# Supplementary material for: Therapeutically Increasing MHC-I Expression Potentiates Immune Checkpoint Blockade
Source: Oxford University Press journal article supplement (doi:10.1158/2159-8290.cd-20-0812), 2021-02-15
Supplement: 21598290cd200812-sup-244871_3_supp_6826075_qmj3gs.xlsx [file 21598290cd200812-sup-244871_3_supp_6826075_qmj3gs.xlsx]

## Sheet: RNAseq_rawcount
	sgCtrl_veh_1	sgCtrl_veh_2	sgTraf3_1_veh_1	sgTraf3_1_veh_2	sgTraf3_2_veh_1	sgTraf3_2_veh_2	sgCtrl_IFNg_1	sgCtrl_IFNg_2	sgTraf3_1_IFNg_1	sgTraf3_1_IFNg_2	sgTraf3_2_IFNg_1	sgTraf3_2_IFNg_2
0610005C13Rik	2	2	1	3	1	3	3	5	7	4	1	1
0610009B22Rik	312	272	301	274	302	306	357	335	361	401	425	534
0610009E02Rik	11	1	5	3	4	5	7	5	5	3	2	4
0610009L18Rik	17	13	11	18	11	15	14	14	15	10	26	22
0610009O20Rik	1039	822	827	897	1049	871	901	849	696	615	580	748
0610010F05Rik	755	530	515	694	738	720	650	634	600	708	626	676
0610010K14Rik	519	488	551	721	723	627	606	520	600	690	561	857
0610012D04Rik	4	0	1	4	1	1	0	0	0	0	4	1
0610012G03Rik	676	532	577	670	826	730	587	696	546	649	657	724
0610030E20Rik	508	434	455	460	624	589	485	485	498	497	419	581
0610037L13Rik	371	287	304	328	399	401	372	435	322	351	325	417
0610038B21Rik	32	27	16	29	36	46	34	27	30	27	14	24
0610040B10Rik	5	5	2	3	2	5	1	9	2	5	2	6
1110002L01Rik	284	269	242	274	269	289	323	304	276	351	328	441
1110004E09Rik	818	743	757	898	953	871	1019	957	1025	1026	1019	1316
1110004F10Rik	4665	4079	4145	5273	5455	4955	4924	5490	5289	6075	5776	7531
1110006O24Rik	5	9	7	10	11	7	10	5	6	3	0	19
1110008F13Rik	2853	2497	2286	2941	3358	2954	2829	3138	2962	3203	3535	4144
1110008L16Rik	320	265	295	347	397	315	380	382	333	251	257	316
1110008P14Rik	338	352	306	349	303	329	392	372	293	337	302	491
1110012L19Rik	192	151	161	198	222	232	175	194	195	220	272	341
1110019D14Rik	38	46	24	48	36	37	51	62	42	52	45	71
1110020A21Rik	3	4	3	1	4	4	7	1	4	0	4	5
1110025M09Rik	1	1	12	4	3	2	8	4	0	4	1	3
1110032A03Rik	79	75	85	72	87	57	74	106	64	58	68	91
1110034G24Rik	59	65	36	74	81	52	63	74	58	81	92	121
1110038B12Rik	915	860	844	840	696	836	806	803	707	796	814	1384
1110038F14Rik	526	453	419	600	521	492	585	776	731	724	721	916
1110046J04Rik	13	7	5	1	5	5	6	9	14	13	11	16
1110051M20Rik	482	368	377	397	441	451	407	445	394	430	381	492
1110059E24Rik	426	297	347	465	523	437	522	542	601	673	732	974
1110059G10Rik	165	145	122	196	147	187	175	216	195	175	251	280
1110065P20Rik	607	523	522	657	690	589	593	700	605	648	610	903
1190001M18Rik	6	0	4	4	5	1	9	6	2	9	7	1
1190005I06Rik	162	169	169	209	140	146	145	159	116	143	109	147
1190007I07Rik	203	158	142	198	199	137	155	194	247	246	232	283
1300002E11Rik	157	158	115	154	134	186	134	130	169	171	164	247
1300017J02Rik	0	0	7	2	5	1	3	0	0	0	3	4
1500002C15Rik	8	3	10	1	8	4	12	2	7	3	3	10
1500004A13Rik	64	73	40	55	75	57	50	60	38	24	36	61
1500009L16Rik	30	25	25	9	16	18	32	30	14	8	12	15
1500011B03Rik	150	149	125	149	143	120	141	118	93	95	111	140
1500011K16Rik	274	316	358	389	384	406	386	407	383	459	467	834
1500015A07Rik	36	30	12	29	33	15	23	25	14	19	12	23
1600002K03Rik	209	225	209	196	214	182	206	262	220	213	263	430
1600012H06Rik	437	282	348	376	453	418	393	469	463	433	439	520
1600014C10Rik	301	240	244	379	368	304	317	295	306	237	207	297
1600019K03Rik	1	2	4	0	7	4	1	2	0	3	4	3
1600020E01Rik	34	36	36	52	38	42	39	51	51	56	66	90
1700001G11Rik	1	1	2	4	6	3	0	4	6	0	3	3
1700001G17Rik	1	4	3	2	2	3	2	4	0	6	0	6
1700001K19Rik	1	0	2	0	0	1	1	2	0	1	0	1
1700001L05Rik	2	5	1	2	5	5	3	4	0	5	1	0
1700003E16Rik	12	6	16	19	19	20	17	12	11	14	18	13
1700003F12Rik	324	290	278	337	328	286	403	366	470	525	621	783
1700007K13Rik	28	29	27	26	36	26	38	26	18	17	14	21
1700007L15Rik	32	25	34	28	35	20	17	25	29	18	45	28
1700008J07Rik	52	66	42	68	58	65	60	41	30	39	28	39
1700008O03Rik	9	0	1	3	0	3	7	1	7	0	0	1
1700010I14Rik	71	53	33	61	32	45	57	67	49	63	41	70
1700012D14Rik	5	3	9	8	5	3	8	6	4	5	8	10
1700016A09Rik	4	0	1	1	1	0	3	0	3	1	0	0
1700017B05Rik	1208	876	939	935	1215	1014	922	925	663	671	460	761
1700018L02Rik	35	32	46	36	62	34	32	24	45	26	15	40
1700019D03Rik	362	279	235	301	351	289	443	512	535	571	488	488
1700020I14Rik	2220	1689	1470	1678	2281	1976	1954	2073	1762	1757	1694	2080
1700021F05Rik	520	492	416	582	583	543	588	575	605	566	629	757
1700022N22Rik	1	2	1	0	0	1	0	0	0	1	3	1
1700024J04Rik	31	20	22	17	19	24	26	22	17	23	13	20
1700025G04Rik	465	364	277	368	407	409	349	421	286	277	220	284
1700027J19Rik	112	136	190	231	237	216	138	142	173	220	158	230
1700028E10Rik	7	6	3	10	6	16	7	11	10	3	4	5
1700028J19Rik	4	7	12	4	2	7	6	6	5	4	4	5
1700029I15Rik	3	3	4	7	8	3	4	2	1	0	5	3
1700030C10Rik	83	61	56	59	63	58	56	46	43	55	36	38
1700030J22Rik	14	13	15	5	9	6	8	11	13	10	8	10
1700030K09Rik	315	226	179	277	303	318	245	310	308	248	202	269
1700034P13Rik	36	33	40	57	100	40	39	44	65	25	21	23
1700037C18Rik	60	43	34	28	47	31	32	64	60	53	57	64
1700037H04Rik	724	706	584	701	740	747	596	601	478	476	404	497
1700040D17Rik	13	1	6	1	2	4	6	6	2	4	0	3
1700047I17Rik1	866	687	780	1019	1003	878	924	1058	895	899	688	877
1700052K11Rik	54	42	42	50	59	33	39	28	32	56	34	45
1700055D18Rik	1	1	2	0	0	6	1	0	1	0	2	0
1700056E22Rik	4	6	1	6	10	2	5	2	2	1	5	7
1700056N10Rik	5	4	1	3	1	2	0	1	0	0	0	8
1700061G19Rik	1	1	0	3	0	0	7	1	2	4	3	9
1700065D16Rik	16	11	10	5	12	9	12	2	4	14	6	17
1700066B19Rik	9	2	4	0	8	11	6	1	2	4	7	12
1700066M21Rik	494	397	377	428	597	520	439	529	601	593	671	773
1700067K01Rik	6	1	2	4	0	5	2	0	2	2	7	2
1700069B07Rik	29	40	51	79	57	41	31	33	31	43	20	42
1700084E18Rik	8	9	3	11	12	9	2	3	3	4	6	10
1700086O06Rik	69	78	36	64	67	62	89	78	48	51	60	59
1700086P04Rik	8	5	5	7	4	1	11	3	3	6	2	5
1700088E04Rik	16	22	18	32	10	14	10	18	12	36	21	29
1700092M07Rik	0	1	3	1	0	7	0	1	1	0	1	4
1700096K18Rik	9	2	12	14	3	5	5	4	3	5	2	3
1700101I11Rik	8	8	5	2	1	1	0	3	2	6	6	10
1700102P08Rik	0	2	5	4	4	3	1	6	6	4	2	5
1700105P06Rik	18	5	7	6	17	10	8	9	8	11	0	17
1700109G14Rik	0	0	3	1	2	2	2	15	1	1	0	2
1700109H08Rik	3	8	0	5	4	4	4	6	10	13	16	9
1700113A16Rik	7	12	3	0	4	5	4	6	3	6	6	8
1700120C14Rik	3	6	1	4	3	1	6	4	0	10	4	4
1700123M08Rik	8	8	16	11	7	10	10	9	8	6	9	9
1700123O20Rik	442	420	434	568	545	534	483	584	518	520	610	858
1700124L16Rik	1	2	2	6	0	2	5	0	1	4	0	5
1810009A15Rik	755	620	709	811	801	846	745	932	1006	992	1271	1718
1810010H24Rik	12	18	7	12	10	14	10	6	4	4	8	1
1810013L24Rik	1037	831	792	1108	1240	1051	1018	1009	966	1054	792	1004
1810014B01Rik	135	96	125	128	181	131	149	108	139	154	125	183
1810019N24Rik	0	0	2	0	0	1	0	1	1	5	2	1
1810021B22Rik	0	3	3	0	2	3	3	3	6	1	1	1
1810022K09Rik	616	654	535	648	675	676	737	721	703	879	925	1351
1810024B03Rik	11	17	12	11	11	6	11	5	11	6	19	6
1810026B05Rik	58	62	73	83	57	85	65	79	84	87	82	114
1810030O07Rik	653	569	500	735	737	642	642	658	665	601	480	621
1810032O08Rik	222	234	215	208	194	205	208	197	256	290	305	441
1810034E14Rik	57	54	55	71	38	46	60	56	40	57	44	40
1810037I17Rik	1082	1079	1183	1392	1438	1388	1299	1425	1602	1902	1885	3034
1810043G02Rik	752	607	543	714	754	632	844	834	718	656	562	749
1810044D09Rik	22	10	17	26	12	22	18	34	12	21	17	22
1810049J17Rik	228	219	287	316	265	221	214	238	184	156	136	184
1810055G02Rik	439	364	292	406	471	388	404	434	356	326	263	366
1810058I24Rik	1437	1271	1442	1514	1657	1460	1279	1335	1168	1099	975	1264
1810059H22Rik	0	2	2	2	2	4	2	0	3	6	8	4
1810062G17Rik	13	8	15	25	12	17	5	16	10	4	24	45
1810062O18Rik	5	7	0	0	6	3	6	2	0	1	3	12
1810065E05Rik	38	34	12	31	12	7	26	34	15	13	13	5
2010001A14Rik	13	18	19	20	20	13	20	13	21	11	18	24
2010008C14Rik	103	74	60	82	110	75	91	68	70	58	34	66
2010015M23Rik	8	8	7	11	9	7	7	13	3	8	13	6
2010107E04Rik	2022	2126	2223	2172	1879	2162	2120	2485	2099	2340	2459	4328
2010110K18Rik	9	6	8	6	5	5	3	13	4	11	16	14
2010111I01Rik	111	109	80	123	100	100	134	140	104	145	158	195
2010204K13Rik	118	140	123	139	111	118	116	130	86	138	100	142
2010300C02Rik	4	5	2	4	5	4	4	9	5	8	3	3
2010315B03Rik	65	53	66	73	81	73	84	102	92	86	125	140
2010320M18Rik	72	57	51	83	71	48	45	64	58	68	46	70
2210008F06Rik	3	10	2	4	2	3	4	3	2	5	5	1
2210010C04Rik	1	3	0	0	0	4	1	0	3	1	3	0
2210011C24Rik	1	1	0	2	2	3	0	1	0	1	1	0
2210016F16Rik	1308	1059	923	1160	1257	1093	1176	1297	1245	1175	909	1096
2210016L21Rik	716	626	625	630	783	724	773	785	691	707	733	917
2210406O10Rik	1	1	2	2	6	2	2	4	5	5	0	2
2210408F21Rik	241	288	286	376	272	323	275	304	265	272	267	376
2210408I21Rik	175	118	109	135	176	176	173	195	191	192	155	194
2210417A02Rik	4	5	2	3	6	6	4	9	1	1	1	5
2210418O10Rik	182	1	3	6	6	208	89	173	217	18	349	433
2300009A05Rik	171	142	151	151	157	148	113	99	102	147	110	137
2310001K24Rik	4	38	20	26	11	18	23	8	26	15	15	31
2310009A05Rik	78	68	71	68	83	74	89	98	62	68	68	89
2310009B15Rik	221	279	270	324	288	256	252	257	228	293	231	411
2310010J17Rik	3	3	13	14	2	5	3	2	4	8	4	7
2310011J03Rik	1462	1400	1418	1724	1768	1604	1549	1677	1617	1677	1623	2212
2310014F06Rik	5	2	2	8	3	1	3	3	2	0	3	1
2310015A10Rik	126	73	87	107	96	101	84	92	71	64	52	77
2310022A10Rik	630	554	558	682	683	581	549	533	503	429	318	492
2310022B05Rik	1845	1486	1285	1550	1747	1474	1322	1209	1046	1026	636	1058
2310030G06Rik	41	30	25	34	14	17	55	29	46	37	38	51
2310033P09Rik	443	377	378	503	456	420	469	440	384	333	305	384
2310034G01Rik	3	10	3	2	2	10	5	6	0	4	5	7
2310035C23Rik	1058	777	745	865	1031	947	930	929	745	745	497	727
2310039H08Rik	261	240	218	284	296	248	273	248	261	216	226	262
2310043P16Rik	8	16	5	10	9	10	8	6	6	6	9	5
2310057J18Rik	30	15	8	9	14	8	21	23	9	15	25	19
2310057M21Rik	652	618	623	786	729	716	728	653	579	562	397	608
2310058D17Rik	94	66	56	55	74	70	70	77	59	58	63	96
2310061I04Rik	631	563	619	658	619	615	489	517	417	437	308	450
2310068J16Rik	28	52	14	30	21	38	41	23	20	16	13	22
2310069B03Rik	7	5	3	6	12	9	5	3	8	8	6	20
2410002F23Rik	1275	1197	1175	1432	1278	1316	1152	1196	980	1160	912	1376
2410004B18Rik	447	459	409	485	566	541	544	579	552	625	693	859
2410004P03Rik	6	6	1	4	1	3	0	0	0	2	1	7
2410006H16Rik	1165	1200	1006	1013	961	1102	1035	1252	1005	1343	1340	2138
2410015M20Rik	1086	1182	1220	1325	1203	1287	1255	1405	1343	1475	1780	2711
2410022M11Rik	46	34	23	17	32	19	25	34	14	29	17	41
2410089E03Rik	978	589	571	708	930	686	691	579	510	503	347	538
2410131K14Rik	769	503	473	643	755	660	639	562	458	525	370	550
2500002B13Rik	9	14	16	10	12	6	18	9	9	15	11	42
2500004C02Rik	10	8	17	11	14	9	12	16	10	18	5	8
2510009E07Rik	482	328	281	383	465	394	484	438	324	320	247	303
2510016D11Rik	12	10	1	9	6	4	5	7	7	3	2	6
2510039O18Rik	2264	1746	1757	2172	2447	1994	1881	1870	1380	1357	993	1563
2510046G10Rik	16	13	23	14	16	6	7	11	16	22	18	29
2610001J05Rik	959	777	886	1072	1057	1029	1004	1016	1036	1076	1115	1502
2610002M06Rik	643	420	436	528	620	634	821	888	1009	1127	992	1289
2610005L07Rik	581	427	396	598	620	457	547	643	526	612	635	750
2610008E11Rik	206	167	103	193	211	160	164	203	170	225	197	198
2610017A05Rik	5	6	11	13	0	4	1	18	5	3	5	8
2610020C07Rik	24	18	21	12	18	20	23	29	19	29	39	23
2610021A01Rik	512	397	376	550	627	496	463	595	532	551	556	658
2610027K06Rik	16	4	3	5	3	1	4	2	4	3	3	1
2610028D06Rik	1	2	1	1	0	0	1	2	0	0	1	0
2610035D17Rik	86	101	98	113	116	110	119	114	83	94	87	125
2610035F20Rik	4	6	10	19	9	17	4	4	8	1	3	7
2610037D02Rik	7	5	6	3	9	4	10	6	1	2	0	10
2610044O15Rik8	150	132	122	119	155	124	137	172	182	182	154	222
2610203C22Rik	20	28	29	31	25	23	23	33	29	14	15	21
2610301B20Rik	376	291	256	274	333	329	359	352	291	301	341	369
2610306M01Rik	63	54	73	77	80	72	70	74	80	89	84	139
2610307P16Rik	0	6	4	4	2	2	0	1	11	1	1	8
2610318N02Rik	99	60	96	113	116	82	77	75	67	90	83	80
2610507B11Rik	9100	6562	6030	7786	9555	7485	8793	8545	6708	6365	4326	6223
2610507I01Rik	35	31	48	46	36	25	33	30	35	23	38	54
2610524H06Rik	134	163	108	117	157	143	170	190	199	194	203	349
2700012I20Rik	8	3	1	0	3	1	4	3	1	6	1	3
2700033N17Rik	64	61	48	61	61	70	67	66	49	62	40	63
2700038G22Rik	50	78	65	67	42	43	54	63	58	46	39	45
2700046G09Rik	14	14	24	12	11	28	15	16	23	12	27	37
2700049A03Rik	677	495	482	544	590	533	559	517	424	336	261	399
2700062C07Rik	177	153	129	201	184	179	176	186	153	168	186	218
2700081O15Rik	923	765	666	988	1055	888	771	710	620	597	526	652
2700097O09Rik	61	55	69	61	74	70	64	74	69	83	65	105
2700099C18Rik	43	41	35	31	53	42	57	66	52	49	61	79
2810001G20Rik	112	94	96	104	103	127	92	100	79	89	130	153
2810002D19Rik	109	105	70	109	114	118	90	105	88	99	78	154
2810004N23Rik	1503	1204	1317	1730	1600	1482	1466	1632	1434	1546	1440	1612
2810006K23Rik	302	246	214	301	362	313	268	306	280	316	310	339
2810013P06Rik	96	70	40	47	76	71	44	50	57	68	63	81
2810021J22Rik	270	265	251	336	372	323	290	338	225	297	210	253
2810025M15Rik	665	539	547	655	784	695	645	693	586	602	669	837
2810029C07Rik	20	27	13	17	18	8	13	18	16	15	20	26
2810032G03Rik	19	18	7	20	16	17	14	13	10	11	15	20
2810039B14Rik	15	16	15	16	12	4	7	21	13	16	9	11
2810402E24Rik	19	41	25	40	57	46	27	49	36	31	30	59
2810403A07Rik	1170	983	997	1032	1261	1006	1005	1005	900	829	687	962
2810403D21Rik	8	21	12	29	23	20	22	18	18	19	17	27
2810405F17Rik	4	0	1	0	3	2	4	9	3	10	0	12
2810408A11Rik	6	7	2	6	6	5	2	2	6	2	0	1
2810408I11Rik	79	46	70	93	95	107	107	94	112	95	99	131
2810410L24Rik	31	69	46	48	28	37	46	42	44	21	27	34
2810414N06Rik	20	6	13	10	13	11	9	7	7	11	4	5
2810425M01Rik	6	1	3	7	4	5	0	0	1	2	0	2
2810429I04Rik	139	102	90	122	113	107	106	103	105	106	105	147
2810454H06Rik	8	9	1	4	7	5	9	1	4	6	5	9
2810455O05Rik	14	9	15	15	16	18	26	9	20	13	19	8
2810468N07Rik	26	8	3	15	19	12	9	9	7	2	0	12
2810474O19Rik	406	266	391	488	610	452	346	369	430	386	316	442
2900005J15Rik	5	6	1	7	4	3	5	4	1	2	3	4
2900009J06Rik	3	1	2	4	3	3	0	4	2	0	1	6
2900041M22Rik	54	38	50	44	52	71	64	62	50	56	87	109
2900052L18Rik	63	58	27	39	61	38	24	33	32	23	31	11
2900076A07Rik	35	26	17	27	15	29	33	15	28	28	40	55
2900089D17Rik	7	8	7	15	9	6	4	9	9	2	15	9
2900093K20Rik	5	17	9	11	3	4	7	11	9	15	13	15
2900097C17Rik	5109	3504	3137	3916	5066	3867	3858	3893	3018	3147	2314	3287
3000002C10Rik	45	17	25	36	37	38	31	30	23	37	45	28
3010001F23Rik	4	1	1	0	0	1	0	3	0	1	2	7
3010003L21Rik	23	31	37	46	36	38	35	37	30	24	38	53
3110001I22Rik	53	47	53	44	55	42	67	57	47	77	89	77
3110002H16Rik	284	215	215	239	273	211	255	235	243	217	187	233
3110006O06Rik	3	4	2	3	4	9	1	1	5	0	2	2
3110009E18Rik	25	29	31	55	20	34	29	38	34	38	29	34
3110021N24Rik	15	13	7	9	35	34	2	15	12	7	19	6
3110035E14Rik	1	0	2	0	0	2	2	3	1	2	2	1
3110040N11Rik	137	167	194	185	194	194	156	203	193	232	250	321
3110043O21Rik	190	150	192	207	226	165	210	228	205	214	242	282
3110045C21Rik	28	22	19	10	20	14	26	28	27	23	27	44
3110053B16Rik	25	31	30	24	26	26	21	34	23	34	22	11
3110056K07Rik	24	18	20	33	28	30	26	19	16	18	28	26
3110062M04Rik	440	346	395	511	471	458	427	453	373	460	346	480
3110070M22Rik	2	3	11	8	6	4	9	9	2	3	8	3
3110082I17Rik	845	707	717	988	844	846	887	901	799	878	952	1129
3110083C13Rik	9	13	4	13	6	9	8	3	12	6	2	10
3222401L13Rik	14	12	18	20	19	13	11	23	19	9	19	10
3300002I08Rik	20	19	34	25	25	42	26	29	21	31	39	50
3830406C13Rik	335	286	248	367	363	357	358	418	348	370	345	453
3830408C21Rik	4	2	1	2	3	2	0	2	3	6	2	4
3930402G23Rik	12	3	4	8	6	5	3	0	1	0	0	6
4430402I18Rik	19	23	25	21	31	30	21	19	15	28	17	34
4632404H12Rik	168	159	130	205	181	155	126	165	146	162	146	196
4632415L05Rik	306	261	265	316	409	330	265	267	232	265	216	289
4632427E13Rik	18	9	6	10	10	14	11	7	15	18	24	26
4632428C04Rik	1	0	1	3	1	0	3	4	2	2	0	0
4633401B06Rik	2	0	3	0	1	0	0	2	1	0	1	3
4731419I09Rik	0	0	1	2	0	0	0	1	1	3	2	1
4732416N19Rik	15	16	19	4	15	7	8	3	15	24	17	27
4732419C18Rik	24	38	19	29	16	30	22	31	27	21	33	26
4732440D04Rik	3	11	1	8	5	16	12	11	10	6	4	7
4732487G21Rik	12	13	6	0	14	4	8	10	4	7	1	5
4732491K20Rik	68	72	58	83	93	75	76	86	51	76	62	88
4732496C06Rik	7	3	1	2	1	4	6	4	1	2	1	3
4833412K13Rik	2	4	1	2	5	0	2	5	0	4	2	6
4833413G10Rik	14	10	7	12	20	9	22	12	6	13	4	16
4833417C18Rik	1	6	1	3	1	3	2	9	5	1	0	8
4833418N02Rik	5	3	1	4	5	6	10	8	5	1	2	4
4833420G17Rik	529	465	438	513	493	488	503	502	440	428	282	378
4833439L19Rik	2324	1972	1806	2276	2353	2057	2064	2148	1844	2011	1368	1687
4833445I07Rik	2	0	3	0	2	7	2	1	3	3	5	5
4921504A21Rik	18	2	7	12	18	7	4	19	18	20	27	27
4921507P07Rik	1	3	6	2	4	4	6	1	4	3	0	1
4921514A10Rik	11	11	14	12	1	7	2	7	7	7	8	7
4921515L22Rik	3	3	3	4	8	1	18	8	4	7	2	9
4921523L03Rik	2	3	0	0	0	3	2	0	1	0	1	2
4921524J17Rik	444	447	388	405	341	379	430	540	465	475	473	604
4921531C22Rik	51	31	58	55	53	72	28	58	39	46	42	59
4921536K21Rik	132	78	83	136	163	108	116	104	86	93	98	100
4930402H24Rik	403	280	230	310	322	299	256	281	225	214	148	260
4930404N11Rik	4	4	2	0	9	5	0	1	7	6	4	26
4930405A21Rik	6	6	1	3	1	3	3	5	2	3	3	3
4930412C18Rik	8	10	0	10	9	7	6	6	2	1	6	9
4930412F12Rik	0	7	0	4	4	0	5	1	1	4	7	0
4930412M03Rik	4	0	0	4	1	0	2	0	1	2	0	5
4930429F24Rik	20	21	11	17	13	19	11	12	20	3	8	10
4930430E12Rik	0	0	0	1	1	0	1	1	0	1	1	1
4930430F08Rik	254	255	249	298	347	255	297	362	333	362	296	359
4930431P19Rik	11	23	13	14	11	6	13	6	14	6	13	19
4930432K21Rik	158	149	144	151	157	138	144	177	191	173	122	122
4930447F24Rik	0	8	9	9	17	11	7	0	6	5	5	8
4930451G09Rik	8	5	3	2	3	1	5	0	4	4	1	2
4930453N24Rik	856	692	744	911	959	885	917	978	1031	996	963	1235
4930455G09Rik	31	35	13	14	41	28	42	23	23	18	31	32
4930466K18Rik	2	0	8	0	8	1	4	3	3	2	5	10
4930471E19Rik	8	6	6	8	5	6	5	13	7	3	10	17
4930478K11Rik	1	0	0	1	3	2	0	3	0	1	0	1
4930480K23Rik	15	15	4	9	15	10	6	11	18	10	8	6
4930481A15Rik	2	1	2	2	5	5	0	0	3	2	5	4
4930481B07Rik	4	6	2	4	9	4	2	3	1	4	0	2
4930500M09Rik	6	10	18	62	75	16	8	15	14	19	0	15
4930503L19Rik	441	368	314	366	357	350	408	348	439	404	399	511
4930505A04Rik	2	7	1	0	1	2	2	1	0	2	1	1
4930507D05Rik	7	0	6	2	3	0	3	6	0	1	2	1
4930509E16Rik	48	36	35	47	50	41	38	42	54	48	53	45
4930509G22Rik	2	3	0	3	2	2	0	0	1	0	1	1
4930512J16Rik	2	0	0	2	0	3	4	1	1	4	4	2
4930513N10Rik	96	54	66	55	102	61	50	36	46	57	24	44
4930515G01Rik	5	2	6	4	5	5	0	3	1	3	2	5
4930516B21Rik	4	3	0	5	8	0	5	3	4	5	8	5
4930518I15Rik	0	0	0	1	3	1	0	0	3	2	3	7
4930520O04Rik	13	8	7	17	19	9	12	9	7	5	13	12
4930522L14Rik	48	29	27	63	38	24	53	44	77	53	46	77
4930524J08Rik	19	16	23	27	25	20	31	8	12	7	8	27
4930524O07Rik	3	5	7	3	17	6	6	15	16	6	2	7
4930526A20Rik	0	1	1	1	0	1	1	1	1	4	1	1
4930532G15Rik	2	1	3	1	0	0	0	2	1	0	3	2
4930535I16Rik	0	2	0	0	3	1	0	5	1	3	0	9
4930537H20Rik	2	2	2	2	1	1	2	0	2	1	0	4
4930539E08Rik	8	1	1	3	0	4	1	1	5	4	0	1
4930539J05Rik	0	0	6	13	0	2	0	1	0	2	6	3
4930540M05Rik	1	4	0	2	2	6	2	0	5	0	2	0
4930547M16Rik	3	1	3	11	3	4	2	3	0	7	2	2
4930555B11Rik	8	10	10	7	7	16	12	13	24	18	31	23
4930556H04Rik	1	2	0	1	2	4	1	2	5	0	0	1
4930556M19Rik	10	7	17	7	18	16	14	17	23	13	22	17
4930558J18Rik	61	48	27	51	75	50	51	46	57	55	70	63
4930558J22Rik	0	0	1	2	3	0	0	5	3	2	0	1
4930563E22Rik	5	3	10	8	3	7	4	5	6	11	11	9
4930565N06Rik	6	2	0	3	5	2	2	3	0	1	4	5
4930570G19Rik	0	6	0	3	2	2	0	0	2	4	1	1
4930577N17Rik	7	11	16	8	17	14	14	16	21	13	3	11
4930578M01Rik	0	0	2	1	0	0	1	2	0	1	1	1
4930579G18Rik	2	2	1	0	0	0	1	2	0	1	0	1
4930579G24Rik	579	476	440	559	630	596	568	585	580	531	501	644
4930579K19Rik	2	2	2	6	2	2	3	9	1	8	6	9
4930581F22Rik	46	30	32	25	40	29	30	33	21	28	23	50
4930590J08Rik	3	8	7	7	5	7	6	3	13	11	3	4
4930594M22Rik	18	10	9	9	17	14	11	8	6	24	16	12
4930599N23Rik	0	1	1	0	0	3	2	5	4	7	0	8
4931406C07Rik	1653	1292	1141	1428	1450	1295	1780	1887	1620	1543	1355	1636
4931406P16Rik	2635	1926	1821	2334	2644	2051	2309	2206	1875	1848	1255	1828
4931408C20Rik	2	0	0	6	1	1	0	1	2	2	0	1
4931414P19Rik	130	115	112	135	172	116	142	132	117	97	80	130
4931422A03Rik	0	5	0	2	2	6	2	1	4	0	2	6
4931428F04Rik	68	57	89	96	73	66	33	69	53	54	43	32
4931440P22Rik	24	28	25	29	52	33	12	30	28	11	12	14
4932422M17Rik	11	11	15	6	17	3	8	17	18	17	15	13
4932438A13Rik	1042	678	567	675	923	713	823	703	586	498	383	606
4932441J04Rik	20	51	36	59	30	29	41	26	62	18	32	22
4932442E05Rik	4	2	2	5	1	0	0	1	0	2	4	0
4932702P03Rik	4	2	0	2	6	1	4	3	1	2	5	1
4933402D24Rik	8	4	2	3	3	5	10	7	12	5	4	3
4933404O12Rik	119	124	121	145	139	94	141	99	121	114	72	97
4933405L10Rik	0	1	3	6	0	5	2	6	0	3	0	2
4933406P04Rik	1	1	3	7	5	2	2	2	7	2	2	2
4933407K13Rik	30	26	20	22	30	26	31	33	23	21	33	37
4933408B17Rik	0	5	6	3	3	5	8	3	2	2	4	8
4933408J17Rik	2	5	5	1	0	3	1	2	0	6	2	1
4933411K16Rik	4	1	2	1	0	0	1	1	0	0	1	0
4933412E12Rik	9	6	11	22	16	15	76	64	74	75	61	119
4933415A04Rik	25	20	40	22	36	32	22	23	12	16	15	6
4933417C20Rik	0	2	0	1	5	4	0	1	0	1	3	4
4933421O10Rik	68	75	72	105	94	102	106	85	77	112	80	101
4933423P22Rik	1	2	0	2	0	2	1	2	1	2	2	2
4933424G06Rik	0	3	0	3	0	2	2	0	0	3	8	6
4933427D14Rik	355	213	303	325	287	322	250	283	242	189	174	231
4933427G23Rik	0	2	0	7	2	2	3	0	0	0	1	1
4933430I17Rik	3	13	9	10	8	8	13	8	7	12	9	10
4933431C10Rik	3	2	5	0	0	3	5	2	1	5	3	9
4933431E20Rik	584	385	292	474	434	420	401	459	354	316	269	398
4933431K14Rik	9	9	4	13	5	10	12	9	8	11	8	10
4933433G19Rik	0	2	2	1	0	2	7	0	7	4	3	4
4933434E20Rik	2061	1710	1592	2159	2469	2178	2203	2719	2631	2764	3001	3580
4933437G19Rik	2	2	0	5	2	0	0	6	2	1	0	3
4933439C10Rik	31	32	12	21	14	12	10	25	15	23	24	38
4933440N22Rik	98	73	85	156	144	106	82	87	64	76	63	94
5031425E22Rik	140	121	108	125	112	100	106	113	73	81	89	94
5031434O11Rik	3	11	3	17	4	10	5	8	6	10	6	8
5031439G07Rik	10281	7566	7668	10027	11780	9290	10245	9981	9051	8287	5395	7985
5033403F01Rik	3	0	0	1	7	0	0	2	1	0	2	2
5033406O09Rik	87	57	66	90	78	83	80	86	82	119	71	80
5033417F24Rik	5	1	1	2	1	0	3	2	0	3	3	1
5033421B08Rik	2	2	0	4	0	1	3	1	0	3	0	2
5033430I15Rik	16	22	31	18	28	32	21	11	21	16	21	23
5330417C22Rik	9	15	11	5	17	15	17	27	19	6	7	5
5330438D12Rik	13	18	16	23	11	15	16	6	18	11	16	9
5430402O13Rik	3	5	6	7	6	7	1	1	1	0	1	6
5430403G16Rik	6	9	7	6	6	8	15	11	5	23	14	18
5430405H02Rik	24	24	6	21	13	13	8	16	9	10	23	21
5430414B19Rik	1	5	0	3	1	6	3	1	0	1	2	1
5430416N02Rik	84	62	65	101	74	72	71	69	71	62	92	90
5430430B14Rik	6	5	1	1	1	2	1	2	0	0	1	0
5430431A17Rik	3	0	0	0	3	0	1	1	1	4	2	2
5530601H04Rik	208	171	163	196	201	234	218	235	232	230	267	310
5730409E04Rik	188	211	165	221	257	248	196	213	174	191	193	230
5730455P16Rik	652	550	531	573	672	554	613	609	572	502	410	520
5730480H06Rik	188	168	222	201	232	242	226	278	320	305	316	441
5730507C01Rik	156	111	126	111	173	116	122	115	149	166	139	182
5730559C18Rik	26	8	19	11	22	27	15	18	18	10	9	18
5730596B20Rik	2	5	1	3	2	4	3	3	4	3	2	4
5830417I10Rik	2437	1744	1646	2206	2646	2029	1969	1738	1380	1368	831	1324
5830432E09Rik	10	10	9	17	19	12	9	7	13	8	12	16
5830444B04Rik	4	4	11	2	16	6	18	15	20	16	21	21
5830454E08Rik	5	4	3	3	0	3	4	3	0	0	4	5
5830462I19Rik	5	1	4	4	3	0	1	7	1	2	2	2
5930403N24Rik	11	11	10	10	27	17	7	8	20	23	11	16
5930420M18Rik	8	5	4	10	8	10	13	12	8	5	12	11
5930430L01Rik	17	8	16	16	18	18	16	35	20	18	14	20
6030442K20Rik	16	12	11	7	12	17	9	15	11	16	14	26
6030443J06Rik	5	8	7	5	20	1	10	4	10	5	14	7
6030445D17Rik	0	5	1	1	4	1	3	2	0	3	1	3
6030458C11Rik	992	744	811	868	914	810	891	924	716	722	582	788
6230400D17Rik	22	6	9	12	16	8	3	11	12	19	15	12
6330403K07Rik	4	0	1	3	0	1	0	2	1	1	0	6
6330403L08Rik	106	58	90	111	135	93	69	48	51	37	39	62
6330418K02Rik	22	13	15	31	17	23	10	35	27	18	34	35
6330537M06Rik	9	18	11	16	17	10	4	12	11	3	1	13
6330549D23Rik	10	7	7	10	13	7	16	7	5	10	9	11
6330562C20Rik	15	33	22	41	18	26	22	31	20	13	24	20
6430511E19Rik	23	5	7	2	10	4	4	7	13	5	10	11
6430531B16Rik	3	1	0	3	3	1	0	0	0	1	0	3
6430548M08Rik	291	226	226	256	265	216	287	235	212	239	128	173
6430550D23Rik	8	7	2	2	2	1	6	0	2	0	1	6
6430562O15Rik	2	2	3	1	1	0	4	6	3	1	2	8
6430571L13Rik	8	5	6	4	4	4	4	2	4	3	2	3
6430573F11Rik	17	8	9	7	4	15	14	21	5	4	3	4
6430573P05Rik	11	2	2	8	3	1	3	3	5	0	0	1
6430590A07Rik	1	3	1	3	1	0	2	0	2	2	1	3
6530402F18Rik	393	288	271	372	484	395	389	390	324	352	253	376
6530409C15Rik	4	0	7	9	1	7	4	0	2	5	1	8
6720427I07Rik	9	1	3	6	11	6	3	7	13	4	16	10
6720469O03Rik	6	5	10	8	9	8	2	6	2	7	6	8
6720489N17Rik	120	111	122	109	116	117	135	174	168	201	177	261
6820431F20Rik	638	576	619	584	656	620	697	663	677	651	746	909
8030462N17Rik	490	392	366	458	600	516	460	493	497	473	330	411
8430422M14Rik	3	9	5	4	3	3	6	2	3	0	7	7
8430429K09Rik	91	93	87	57	94	100	100	82	78	93	69	80
8430432A02Rik	6	2	7	5	2	1	8	5	2	0	8	6
9030407P20Rik	49	25	32	37	37	39	36	32	28	24	32	19
9030612E09Rik	2	5	0	2	2	0	0	2	5	0	1	7
9030624G23Rik	1	3	6	3	2	1	2	2	3	3	2	6
9030624J02Rik	2279	1755	1842	2239	2542	2217	2025	1988	1847	1604	1112	1582
9130008F23Rik	83	56	71	64	59	64	64	86	34	77	90	113
9130011E15Rik	486	366	349	446	571	432	442	464	363	438	306	344
9130019O22Rik	65	52	81	71	104	77	77	62	83	58	44	87
9130023H24Rik	70	78	63	76	113	75	68	70	49	64	57	80
9130024F11Rik	4	1	5	3	12	0	5	2	4	6	6	5
9130208D14Rik	1	0	1	0	3	1	1	4	0	0	2	1
9130221H12Rik	101	65	84	95	86	81	77	92	46	67	31	64
9130230N09Rik	5	3	6	1	0	4	2	0	2	0	3	2
9130401M01Rik	866	745	783	1042	1114	925	836	949	1012	954	930	1186
9130604C24Rik	4	12	6	4	9	2	6	7	1	4	6	9
9230110C19Rik	155	131	147	169	180	219	202	179	192	243	209	246
9230111E07Rik	0	1	1	2	2	4	3	4	2	1	9	6
9230112E08Rik	131	91	70	99	103	74	73	86	59	42	40	54
9230114K14Rik	75	53	56	80	87	53	55	62	49	65	75	54
9230116N13Rik	1	1	10	3	8	10	11	4	5	11	12	9
9330020H09Rik	52	38	12	22	17	26	17	16	34	25	14	33
9330102E08Rik	22	30	18	48	36	33	34	16	26	32	30	21
9330104G04Rik	28	14	11	22	15	10	17	24	10	15	3	22
9330151L19Rik	33	15	28	40	22	26	46	33	20	41	18	31
9330159F19Rik	26	32	35	24	29	39	45	41	18	27	18	33
9330159M07Rik	11	7	11	9	10	9	4	10	9	3	8	9
9330160F10Rik	1	5	9	0	9	5	0	0	1	6	1	4
9330161L09Rik	2	3	4	3	4	2	3	5	2	3	5	11
9330162012Rik	10	14	3	10	5	7	15	3	10	6	13	1
9330162G02Rik	31	13	27	32	17	22	14	21	46	46	18	38
9330175E14Rik	0	0	0	0	1	0	142	126	128	110	85	119
9330179D12Rik	1	0	0	5	3	2	6	4	1	9	8	2
9330182L06Rik	313	195	147	228	222	240	210	222	163	146	121	144
9430002A10Rik	6	0	3	4	2	2	3	2	2	1	0	3
9430015G10Rik	450	349	344	451	513	415	421	410	358	444	406	535
9430034N14Rik	14	4	4	1	4	2	7	5	8	3	4	7
9430037G07Rik	0	0	2	0	1	1	2	2	7	0	0	3
9430037O13Rik	2	1	5	2	4	8	3	5	2	7	1	3
9430038I01Rik	155	130	137	128	161	125	178	169	190	205	217	308
9430053O09Rik	3	3	1	2	1	0	5	13	3	1	6	4
9430064I24Rik	4	0	3	8	2	4	3	5	8	5	4	4
9430081H08Rik	11	7	9	12	15	9	11	14	15	18	22	17
9430091E24Rik	5	0	4	6	5	1	1	10	3	3	5	14
9430092D12Rik	0	1	0	1	2	1	4	11	0	4	5	1
9530018F02Rik	1	8	7	3	7	12	4	3	7	4	7	8
9530026P05Rik	3	4	3	2	2	3	2	9	9	10	7	6
9530027J09Rik	3	3	0	3	1	0	0	0	6	2	1	2
9530052C20Rik	3	4	2	1	7	0	7	7	1	2	1	4
9530053A07Rik	0	3	2	6	6	2	1	5	1	0	2	2
9530056K15Rik	4	4	0	1	1	3	4	7	1	2	6	5
9530062K07Rik	0	2	0	1	1	1	0	1	3	1	1	1
9530068E07Rik	4668	3778	3837	4594	4971	4465	4148	4208	3992	4282	4038	4942
9530077C05Rik	19	18	8	19	15	11	26	12	16	32	20	18
9530082P21Rik	8	4	8	1	2	7	52	39	51	57	52	57
9530085L11Rik	0	1	3	2	0	7	6	2	0	0	1	4
9630013D21Rik	9	6	7	15	5	10	8	15	14	26	17	29
9830144P21Rik	14	6	3	6	6	4	2	1	2	3	8	11
9930012K11Rik	209	169	153	167	228	192	194	200	157	174	233	238
9930014A18Rik	280	194	214	301	309	214	265	324	231	220	159	142
9930021J03Rik	563	370	341	404	503	461	423	429	291	349	161	281
9930104L06Rik	147	131	114	157	139	134	139	131	122	120	134	205
A030001D20Rik	41	32	24	33	42	19	17	44	20	34	28	33
A130010J15Rik	329	282	238	312	345	367	344	308	340	328	338	346
A130014A01Rik	12	6	15	7	7	12	8	7	15	8	5	11
A130051J06Rik	22	25	24	22	32	28	11	14	24	15	24	18
A230020J21Rik	80	100	103	160	232	127	107	138	114	140	88	152
A230050P20Rik	2	1	1	4	2	0	2	2	9	20	8	1
A230056P14Rik	24	12	17	26	31	24	25	33	23	28	44	64
A230060F14Rik	16	30	55	57	20	32	35	18	24	37	45	36
A230065N10Rik	7	15	1	12	2	17	26	27	24	33	14	28
A230072C01Rik	10	14	6	7	7	11	6	10	5	13	17	22
A230103J11Rik	8	8	2	7	11	7	3	7	2	5	3	9
A2ml1	0	0	0	1	8	1	0	1	2	3	4	0
A330009N23Rik	16	20	16	23	13	17	13	14	13	18	16	21
A330035P11Rik	15	4	8	17	17	12	4	3	2	3	6	17
A330049N07Rik	1	4	3	5	2	4	4	1	1	2	0	3
A330069E16Rik	16	10	11	18	19	11	14	15	13	4	8	15
A330074K22Rik	0	2	1	2	3	5	1	0	0	3	1	1
A430005L14Rik	512	432	485	565	694	558	577	677	685	735	665	880
A430018G15Rik	19	7	12	21	13	12	12	18	11	10	11	11
A430033K04Rik	148	86	111	109	125	113	101	125	105	109	61	92
A430035B10Rik	2	5	1	3	7	1	3	3	4	13	0	3
A430046D13Rik	19	9	8	19	6	8	11	18	8	25	8	6
A430057M04Rik	53	35	39	33	36	44	36	46	69	65	49	51
A430078I02Rik	1	0	1	4	6	1	0	6	2	1	1	6
A430103D13Rik	2	30	5	16	6	5	10	10	7	12	5	4
A430105I19Rik	110	79	77	92	136	141	55	77	47	62	64	88
A430105J06Rik	3	1	5	5	0	2	4	3	2	4	11	5
A430108G06Rik	24	12	8	8	7	11	9	6	12	11	13	14
A430110L20Rik	2	2	3	3	3	1	0	4	4	1	0	1
A530016L24Rik	41	32	24	34	30	46	19	27	24	24	15	32
A530017D24Rik	73	102	88	68	78	60	78	80	67	30	27	56
A530064N14Rik	7	10	2	9	13	8	5	12	13	3	3	18
A530072M11Rik	1	0	2	2	0	2	0	0	2	9	0	2
A530083I20Rik	1	4	1	1	8	2	0	3	0	3	5	1
A630001G21Rik	135	127	106	128	140	128	100	110	103	99	87	130
A630052C17Rik	34	28	22	13	38	34	29	22	20	31	16	38
A630072M18Rik	112	93	58	87	168	110	134	96	81	45	49	70
A730011C13Rik	0	7	2	3	2	6	9	8	2	3	7	12
A730015C16Rik	8	0	4	0	0	4	0	8	0	5	13	8
A730017L22Rik	50	57	51	43	41	53	63	64	48	51	26	48
A730071L15Rik	2	6	0	2	0	0	0	2	4	8	1	3
A730085K08Rik	0	0	1	0	4	3	0	1	4	0	3	1
A730089K16Rik	11	19	0	4	10	8	4	23	4	0	4	6
A730091E23Rik	8	2	3	0	2	2	3	3	1	2	1	12
A830005F24Rik	3	4	5	2	5	0	1	1	4	4	4	6
A830010M20Rik	90	98	62	103	99	118	86	120	83	84	81	90
A830019P07Rik	315	196	165	154	247	241	252	289	277	282	292	387
A830035O19Rik	4	3	8	15	12	5	1	6	3	0	1	0
A830052D11Rik	1	0	2	0	1	0	10	6	0	2	3	5
A830073O21Rik	2	2	2	6	4	3	9	6	3	5	9	6
A830082K12Rik	138	151	101	122	123	125	108	161	120	135	168	170
A830082N09Rik	19	15	12	10	42	9	20	16	6	27	9	22
A930001C03Rik	1	4	7	7	5	3	3	3	0	7	0	10
A930003O13Rik	1	3	2	0	2	0	0	4	0	1	2	1
A930004D18Rik	361	235	243	285	311	243	250	266	235	238	147	203
A930004J17Rik	23	34	18	18	18	19	42	33	27	24	33	47
A930005H10Rik	43	59	48	54	39	44	44	39	34	39	45	45
A930007I19Rik	5	7	5	5	5	5	6	9	5	5	15	6
A930012O16Rik	3	4	4	7	8	4	5	15	2	1	5	3
A930016O22Rik	3	2	0	1	2	0	3	3	2	0	0	0
A930024E05Rik	30	16	9	12	19	7	9	13	14	17	11	20
A930029G22Rik	6	4	11	11	5	16	10	2	5	7	0	10
A930033H14Rik	9	4	1	1	12	5	6	4	4	3	1	2
A930035D04Rik	3	23	6	21	7	12	3	9	1	7	5	1
A930037H05Rik	27	9	19	15	21	22	14	6	9	10	5	9
AA386476	3	1	3	1	0	1	0	3	3	0	1	6
AA465934	10	30	13	26	14	8	13	14	8	25	14	27
AA467197	4	3	9	11	7	9	13	14	16	14	22	24
AA474408	3	3	4	6	2	2	7	7	1	3	7	9
AA543186	7	6	0	9	8	8	5	7	3	2	1	7
AA914427	1	3	0	5	1	0	3	0	0	0	2	1
AA986860	9	9	18	3	8	9	10	16	15	10	2	16
Aaas	1414	1033	1165	1324	1355	1184	1131	1282	1015	947	722	999
Aacs	3067	2500	2461	2926	2852	2715	2986	2941	2388	2299	1553	2236
Aaed1	404	337	333	400	488	397	401	380	404	412	374	532
Aagab	1054	845	800	1051	1005	976	1029	1121	1015	1013	948	1029
Aak1	3426	2678	2663	3171	3699	2873	3052	2621	2310	2353	1594	2436
Aamdc	59	64	44	56	66	66	66	73	38	73	44	78
Aamp	3618	3136	3155	3785	3995	3602	3444	3600	2964	2898	2285	3265
Aar2	2159	1692	1688	2128	2524	2110	2095	2188	1750	1970	1886	2072
Aars	11964	9921	10277	12815	14252	11987	10606	10597	9123	8429	5914	8641
Aars2	604	420	437	632	610	507	463	443	370	334	239	317
Aarsd1	1524	1277	1290	1556	1624	1474	1406	1510	1349	1277	932	1254
Aasdh	125	94	87	140	123	137	153	144	140	101	103	137
Aasdhppt	797	635	717	788	783	754	797	902	795	1092	1041	1225
Aass	15	16	17	28	23	15	41	33	42	22	11	27
Aatf	1409	1221	1256	1610	1548	1521	1400	1414	1201	1128	853	1157
Aatk	184	96	86	85	138	103	85	67	53	56	36	42
Abat	500	374	309	449	571	451	407	356	332	351	255	355
Abca1	303	196	270	358	430	350	292	173	217	239	140	303
Abca12	1877	1324	1015	1204	1185	877	1132	1020	628	621	347	488
Abca13	17	8	11	9	6	5	3	17	8	2	2	6
Abca2	1498	1146	1278	1600	1959	1597	901	876	817	862	674	992
Abca3	1500	934	867	1268	1449	1139	1025	992	836	843	482	833
Abca4	5	12	8	9	12	9	14	13	5	11	5	21
Abca5	407	273	293	359	407	441	411	386	432	353	251	361
Abca7	795	603	595	674	883	636	645	588	476	498	304	543
Abca8a	22	26	10	11	17	10	9	12	1	6	9	9
Abca8b	68	51	47	60	82	61	89	63	88	61	59	78
Abca9	2	2	0	2	0	0	0	1	0	3	1	1
Abcb10	853	724	667	803	808	753	762	796	705	712	657	670
Abcb1a	2	1	1	1	1	0	0	2	1	2	1	5
Abcb1b	871	648	716	1077	1220	989	909	891	997	987	868	970
Abcb4	3	2	3	2	2	0	2	0	3	0	1	0
Abcb6	1808	1426	1348	1921	2205	1726	1753	1918	1761	1707	1410	1631
Abcb7	3926	2784	2681	3361	4234	3662	3674	3759	3838	3777	3338	3737
Abcb8	1739	1440	1326	1717	1730	1595	1419	1509	1329	1211	1011	1210
Abcb9	77	53	28	48	45	46	41	40	18	17	16	23
Abcc1	1576	1211	1220	1462	1797	1532	1189	1143	1011	1054	633	1044
Abcc10	187	149	176	173	187	149	151	137	137	147	97	128
Abcc2	2	3	4	2	29	11	6	9	2	2	12	15
Abcc4	1622	1140	1043	1159	1435	1297	1243	1348	1031	1000	674	972
Abcc5	1657	1354	1394	1503	1657	1469	1560	1385	1300	1380	960	1362
Abcd1	197	164	145	175	182	162	185	202	134	159	84	149
Abcd2	12	10	8	6	6	9	10	9	9	12	5	14
Abcd3	2849	2209	2200	2674	3042	2688	2563	2682	2346	2267	1885	2343
Abcd4	199	150	156	168	148	169	146	135	154	108	94	144
Abce1	7305	5648	5280	6702	8039	7034	6793	7089	6679	6519	5477	6428
Abcf1	6590	5418	5241	6580	7170	6112	6206	6167	4790	4520	3277	4596
Abcf2	4713	3655	3820	4390	5078	4483	4285	4036	3667	3566	2997	3439
Abcf3	1382	1123	1144	1517	1661	1494	1527	1604	1431	1416	1135	1269
Abcg2	374	295	296	395	424	394	351	427	317	367	414	381
Abcg4	11	6	11	13	6	7	9	5	3	9	5	12
Abhd1	9	14	11	8	5	9	15	15	9	13	4	10
Abhd10	501	387	379	495	505	498	488	559	505	527	569	595
Abhd11	264	234	255	339	296	297	293	278	277	325	265	448
Abhd12	1494	1267	1139	1513	1790	1504	1364	1536	1428	1387	1306	1437
Abhd13	1321	863	902	1112	1308	1138	1232	1257	1142	1306	1281	1465
Abhd14a	279	224	224	301	301	259	297	322	279	348	265	324
Abhd14b	161	143	133	149	150	160	138	133	111	126	68	145
Abhd15	70	59	57	56	75	55	66	55	43	39	36	50
Abhd16a	876	715	730	997	991	811	1860	1906	1962	1894	1598	1901
Abhd17a	1674	1485	1399	1845	2025	1852	1621	1714	1561	1606	1386	1718
Abhd17b	507	388	343	397	476	496	462	525	502	485	511	587
Abhd17c	1183	802	833	954	1129	1032	978	1030	825	822	569	838
Abhd18	81	81	71	105	106	91	84	132	99	84	64	129
Abhd2	975	792	809	940	1183	1037	903	913	848	795	683	888
Abhd3	7	9	2	4	7	13	15	15	7	3	1	7
Abhd4	1205	923	842	1055	1238	1064	912	1020	771	767	567	784
Abhd5	1257	924	957	1251	1250	1241	1258	1426	1410	1471	1531	1572
Abhd6	257	242	219	281	320	245	272	322	271	275	315	330
Abhd8	2900	2302	2253	2887	3360	2883	2618	2787	2340	2268	1675	2290
Abi1	2409	1925	1930	2162	2571	2309	1938	2051	1982	1955	1825	2273
Abi2	2469	1961	1755	2201	2659	2146	2113	2270	2079	2036	1394	1792
Abi3	46	45	20	36	57	45	39	51	20	26	10	30
Abl1	5214	4255	3769	4595	5247	4382	3820	3681	2812	2617	1755	2787
Abl2	2242	1596	1461	1774	2157	1706	1709	1495	1197	1108	778	1238
Ablim1	594	425	379	452	539	390	554	528	373	400	237	346
Abr	1182	817	881	964	1216	1011	962	995	763	725	601	863
Abracl	1299	1180	1175	1315	1457	1482	1350	1447	1459	1668	1494	2468
Abraxas1	219	226	231	298	280	268	241	297	322	323	323	446
Abraxas2	688	560	536	718	867	703	682	766	630	619	531	713
Abt1	440	345	319	420	501	440	409	424	339	393	332	450
Abtb1	312	302	301	362	366	323	319	315	324	303	251	276
Abtb2	440	365	431	566	694	513	382	352	340	290	198	358
Acaa1a	860	749	803	1020	894	839	798	928	937	869	683	989
Acaa1b	2	0	0	2	2	1	0	4	0	1	2	2
Acaa2	679	574	503	631	676	572	590	664	530	584	488	550
Acaca	5784	4238	3704	4687	5697	4351	4980	4343	3534	3155	1922	3112
Acacb	178	152	128	168	175	132	174	177	137	141	99	138
Acad10	125	106	103	121	99	116	144	119	110	101	98	133
Acad11	441	332	375	453	512	430	434	362	331	322	218	326
Acad12	53	36	30	49	54	40	44	63	47	46	29	42
Acad8	597	512	482	580	641	565	549	596	525	526	452	548
Acad9	1361	1161	1124	1469	1516	1302	1250	1327	1323	1241	1051	1427
Acadl	2189	1829	1888	2200	2216	2093	2374	2441	2381	2479	2127	2565
Acadm	1460	1251	1154	1308	1326	1230	1401	1508	1287	1350	1377	1548
Acads	1276	1149	969	1260	1359	1297	1189	1254	1154	1160	1108	1362
Acadsb	996	778	834	892	1108	1014	1026	1020	1031	1075	940	1127
Acadvl	1043	872	1074	1117	1427	1191	1010	1130	977	966	795	1014
Acap1	11	9	3	3	2	2	5	1	1	0	0	3
Acap2	1728	1189	1141	1405	1704	1453	1256	1292	1102	1084	750	1096
Acap3	750	549	539	701	736	623	506	615	459	473	290	426
Acat1	3820	2918	2813	3293	3636	3414	3415	3732	3292	3487	3291	4035
Acat2	5334	4321	4525	5271	5904	5300	5584	6177	5526	5565	5012	6030
Acat3	3	1	0	0	1	1	0	1	5	5	0	3
Acbd3	1667	1286	1324	1605	1819	1475	1390	1522	1264	1140	916	1180
Acbd4	176	129	148	199	234	175	189	172	144	162	125	192
Acbd5	586	441	450	485	599	562	554	522	532	523	423	511
Acbd6	1503	1218	1176	1464	1747	1370	1422	1633	1252	1247	963	1367
Accs	89	69	87	91	96	100	58	68	75	77	63	66
Acd	622	591	553	704	706	551	611	577	541	540	380	503
Ace	3	0	1	1	1	0	0	1	3	0	1	0
Acer2	433	291	237	277	383	303	348	383	252	294	167	240
Acer3	255	198	168	214	285	249	285	314	303	373	391	479
Ache	58	40	34	41	80	55	22	27	17	20	14	32
Acin1	4738	4012	4027	4764	4684	4288	3852	3598	2847	2513	1807	2914
Ackr3	195	134	64	97	93	80	177	181	110	91	75	126
Ackr4	2	0	2	0	0	2	6	3	0	2	1	0
Acly	19807	16142	15369	19357	19987	17826	18170	18291	14803	13272	8709	12013
Aco1	1770	1368	1353	1800	2046	1670	1615	1673	1491	1189	960	1349
Aco2	11502	8836	8466	10476	11953	10703	9833	10320	8312	7947	6662	8309
Acot1	677	494	363	475	530	442	721	748	507	585	394	440
Acot11	78	83	53	58	32	44	87	79	39	53	25	38
Acot13	720	701	595	732	772	871	797	945	1002	1096	1251	1653
Acot2	445	354	350	454	484	411	430	492	473	436	329	426
Acot7	2709	2415	2123	2575	2718	2644	2373	2528	1961	2033	1871	2386
Acot8	132	160	123	159	161	152	157	210	146	191	174	211
Acot9	850	699	651	819	1065	950	871	981	1051	1065	1212	1564
Acox1	1852	1377	1384	1586	2000	1601	1612	1513	1154	1035	735	1130
Acox3	250	211	205	224	270	237	217	221	174	151	131	205
Acp1	2733	2204	2280	2821	3226	2751	2767	3202	2861	3270	3008	3683
Acp2	909	695	636	848	953	874	789	888	730	667	628	700
Acp6	419	343	377	407	471	425	402	472	380	373	293	451
Acp7	8	12	11	13	12	6	21	24	11	11	7	16
Acpp	797	500	496	656	715	666	505	605	493	486	399	620
Acrbp	16	9	11	16	13	11	10	6	12	16	18	24
Acsbg1	25	17	18	26	31	23	16	20	21	14	11	9
Acsf2	1108	881	868	1101	1077	865	1009	963	787	730	460	669
Acsf3	580	531	533	539	679	572	523	559	495	469	388	444
Acsl1	878	679	654	807	928	820	851	877	724	645	527	670
Acsl3	2865	2335	2194	2606	2772	2419	2809	2708	2601	2541	2229	2559
Acsl4	1100	916	876	979	1401	1086	1161	1111	1309	1373	1110	1242
Acsl5	2809	2348	2280	2978	3205	2869	4114	4269	3808	4012	3793	4663
Acsl6	21	21	30	12	38	23	41	39	15	17	16	17
Acsm3	0	3	1	7	3	1	3	7	5	0	0	0
Acss1	52	56	35	45	49	24	38	61	28	22	21	17
Acss2	330	286	244	356	366	317	357	361	321	294	185	302
Actb	66138	52616	53515	69508	81219	69698	60086	62543	58569	53601	40186	52376
Actg1	49442	39784	41008	48630	53451	49063	43470	44844	39835	38123	31017	42010
Actg2	0	2	2	4	4	5	0	0	5	0	2	6
Actl10	2	4	0	1	5	2	3	6	0	5	1	6
Actl6a	3234	2805	2708	3119	3332	3293	2996	3339	2996	3470	3322	3723
Actn1	3198	2532	2447	3194	3508	3018	2227	2208	1826	1794	1150	1910
Actn2	0	2	2	2	2	0	0	1	0	5	0	1
Actn3	13	10	10	11	12	11	3	8	4	5	7	3
Actn4	15535	12664	11761	15157	16588	14059	12353	12051	9679	8721	5999	9260
Actr10	2471	2135	1936	2518	2730	2435	2494	2909	2632	2759	2784	3379
Actr1a	4256	3357	3307	4292	4738	4206	3983	4110	3350	3344	2758	3333
Actr1b	7146	5619	5389	7175	7839	6762	6641	6977	5948	5411	4085	5719
Actr2	7517	5530	5289	7210	9194	7734	7095	7456	7416	6992	5639	6822
Actr3	10095	8096	7851	10021	12183	10804	10339	11437	11366	11675	11060	12629
Actr3b	85	54	59	66	86	76	83	62	81	79	84	94
Actr5	402	329	250	386	434	418	361	386	334	367	281	345
Actr6	249	244	202	218	241	294	308	278	320	401	417	449
Actr8	647	570	547	745	754	668	541	679	493	493	433	510
Actrt3	0	1	1	3	1	1	0	1	1	3	2	0
Acvr1	587	479	395	565	580	572	489	475	410	374	312	467
Acvr1b	174	175	154	150	150	189	185	127	119	107	84	109
Acvr2a	595	461	446	485	669	611	604	619	573	568	552	568
Acvr2b	84	53	54	83	70	67	62	87	33	56	60	64
Acvrl1	751	645	484	691	845	634	571	602	424	403	371	434
Acy1	160	120	135	165	153	167	147	169	94	100	80	117
Acy3	78	77	88	68	81	70	76	69	68	46	34	79
Acyp1	125	125	85	127	79	94	111	132	110	140	130	203
Acyp2	99	77	94	76	75	95	109	93	82	103	150	185
Ada	218	153	159	248	251	192	293	329	283	319	305	345
Adal	224	136	137	181	211	154	219	202	150	175	132	211
Adam10	3258	2526	2326	2952	3332	2884	2912	2916	2788	2666	1987	2561
Adam11	67	45	60	49	61	50	54	35	21	47	20	28
Adam12	1281	859	702	779	797	631	599	613	341	326	199	303
Adam15	1546	1289	1168	1553	1542	1311	1311	1292	1072	1096	847	1109
Adam17	1965	1481	1675	2100	2393	2155	1547	1739	1735	1613	1208	1698
Adam19	350	292	301	339	421	373	151	141	119	91	83	156
Adam1a	13	13	11	10	25	25	12	15	17	3	11	19
Adam21	0	0	3	1	3	0	4	3	1	1	0	1
Adam22	19	7	12	17	10	20	11	5	10	12	4	15
Adam23	233	209	150	170	150	125	148	151	75	83	46	85
Adam32	1	1	0	2	2	0	0	0	3	1	1	2
Adam33	2	0	1	9	2	0	2	1	2	1	3	3
Adam4	7	2	5	1	0	2	3	2	1	13	5	7
Adam8	11	18	6	16	8	10	5	6	2	8	14	5
Adam9	7824	6026	5460	6141	6723	6078	5270	5353	4361	4056	2985	4183
Adamts1	4032	3283	3381	3900	4728	4252	2288	2110	2067	1882	1534	2265
Adamts10	246	156	155	163	185	184	152	176	153	188	154	236
Adamts12	495	309	276	296	378	315	293	284	203	165	132	223
Adamts13	18	18	11	27	16	17	27	15	12	17	13	21
Adamts14	212	163	159	224	296	245	135	157	126	144	118	189
Adamts20	237	204	248	287	336	288	240	197	227	158	156	266
Adamts4	800	596	433	564	687	571	620	580	362	331	311	411
Adamts5	96	88	104	115	127	152	64	54	89	53	61	50
Adamts6	15	20	16	23	16	12	28	24	14	35	30	31
Adamts7	13	10	22	19	14	25	15	5	15	5	1	3
Adamts9	47	28	14	20	37	14	17	22	3	16	6	13
Adamtsl1	8	1	6	1	2	1	3	3	2	2	2	1
Adamtsl2	26	18	16	22	18	33	23	15	6	17	14	25
Adamtsl4	231	189	193	255	253	242	219	223	220	191	168	261
Adamtsl5	428	340	370	402	537	521	289	301	286	265	268	414
Adap1	3	1	3	4	8	10	1	3	2	0	0	5
Adar	1324	1171	1036	1258	1490	1248	2295	2133	1923	1826	1300	1868
Adarb1	190	132	86	147	170	100	122	132	71	100	63	122
Adat1	161	171	134	196	190	179	147	209	144	144	119	116
Adat2	224	212	204	286	268	274	235	215	273	200	252	353
Adat3	94	95	82	112	116	103	94	65	70	111	67	94
Adck1	461	347	397	479	480	441	484	454	334	437	313	468
Adck2	417	372	414	531	542	447	395	427	416	434	372	486
Adck5	308	287	306	357	430	318	277	289	332	262	312	340
Adcy2	61	66	40	58	62	34	44	46	43	43	32	15
Adcy3	1323	964	908	1122	1264	1045	1014	984	810	819	537	851
Adcy6	808	630	605	708	804	684	553	577	415	422	277	409
Adcy7	1779	1492	1256	1674	1772	1643	1324	1405	1108	1134	859	1124
Adcy9	210	120	136	177	206	157	162	118	138	158	74	118
Add1	2388	1999	1846	2511	2602	2292	2216	2292	1805	1752	1263	1687
Add3	797	603	538	667	723	638	692	689	567	543	385	557
Adgb	132	120	115	152	176	103	145	131	145	129	74	84
Adgra2	1354	1037	959	1188	1432	1276	916	976	613	624	556	772
Adgra3	3544	2476	2140	2735	3136	2517	2622	2631	1973	1924	1405	1750
Adgre5	260	200	185	187	212	141	173	171	132	134	80	111
Adgrf2	17	14	16	16	19	11	14	2	4	23	7	6
Adgrg1	3296	2304	2086	2538	2702	2266	2347	2247	1598	1570	994	1588
Adgrg3	0	2	0	4	2	1	2	2	2	1	0	4
Adgrl1	1335	992	844	901	956	900	880	833	552	574	315	629
Adgrl2	5884	4493	3829	4949	5666	5094	4515	4054	3188	3081	2429	3698
Adh1	29	35	24	29	41	47	34	41	38	29	26	51
Adh5	2553	2196	2205	2606	2836	2648	2467	2710	2482	2437	2297	2939
Adh7	568	431	352	504	625	586	488	557	472	529	732	737
Adhfe1	382	325	304	334	294	281	327	350	318	306	251	327
Adi1	2379	2008	1921	2194	2239	2221	2303	2412	2140	2194	2021	2435
Adipor1	4420	3460	3317	4131	4749	4193	3955	4083	3381	3356	2897	3710
Adipor2	2422	2063	1987	2653	3085	2537	2343	2520	2504	2191	1830	2321
Adk	967	809	710	828	842	827	799	998	863	866	858	1003
Adm	15	15	7	13	11	14	10	5	10	1	1	6
Adnp	2626	2578	2405	2899	3227	2568	2519	2364	1928	1916	1471	2176
Adnp2	950	738	717	981	1046	966	854	863	789	697	530	717
Ado	1887	1361	1189	1434	1924	1499	1421	1432	1306	1354	806	1082
Adora2a	17	20	11	15	13	21	6	8	7	5	6	9
Adora2b	17	4	8	4	1	8	4	9	10	6	6	2
Adpgk	1086	860	921	1034	1068	956	1050	975	938	942	943	1066
Adprh	1687	1494	1626	1967	1880	1751	1596	1733	1731	1898	1721	1903
Adprhl2	603	665	630	863	810	679	642	651	643	652	599	765
Adprm	238	175	173	217	237	186	179	200	292	221	215	306
Adrm1	4011	3772	3874	4400	4448	4247	3825	3802	3350	3349	2724	3882
Adsl	3653	3026	2917	3912	4047	3796	3647	4121	3776	3803	3770	4124
Adss	1631	1465	1422	1818	2054	1826	1636	1947	1904	1996	1768	2090
Adssl1	149	126	121	138	150	142	144	142	112	110	82	65
Aebp1	8051	6450	6642	7842	8107	7367	6424	5986	4964	4715	3367	5463
Aebp2	3509	2636	2900	3482	3683	3131	2792	2611	2304	2183	1370	2325
Aen	2238	1737	1686	1989	2415	2017	1676	1699	1438	1284	1295	1661
Aes	6633	5413	5484	6109	5804	5534	5091	5075	3947	3740	2769	3886
Afap1	861	610	593	691	852	709	789	576	467	462	319	567
Afap1l1	74	59	18	60	36	35	54	58	18	21	8	22
Afap1l2	39	31	18	25	33	34	6	18	11	6	5	10
Afdn	4467	3411	3508	4205	5049	4191	3512	3189	2725	2592	1795	2811
Aff1	772	566	631	741	910	774	820	727	636	656	442	744
Aff3	954	683	576	754	843	742	893	667	587	636	340	609
Aff4	5183	3749	3564	4247	5604	4391	4248	3826	3736	3822	2682	3497
Afg1l	191	176	137	197	217	196	226	209	204	193	139	190
Afg3l1	2827	2147	2204	2692	2865	2515	2599	2547	2278	1902	1422	1854
Afg3l2	2473	1900	1907	2137	2463	2149	2175	2153	1661	1605	1115	1556
Afmid	179	128	192	188	202	182	131	180	148	120	116	135
Aftph	985	723	754	961	999	899	961	1007	842	860	721	892
Aga	680	564	598	675	689	664	640	702	669	824	747	1027
Agap1	1186	869	822	980	1291	1054	948	958	755	740	470	800
Agap2	0	0	0	6	1	1	1	7	1	0	1	2
Agap3	1525	1277	1247	1561	1540	1408	1256	1226	924	813	562	862
Agbl3	89	46	49	98	102	98	96	64	109	110	130	121
Agbl5	167	124	94	144	182	134	170	135	100	105	72	103
Ager	5	3	5	12	4	3	7	6	2	1	6	4
Agfg1	2842	2141	2127	2621	3293	2621	2895	2917	2796	2957	2254	2921
Agfg2	403	406	292	421	321	263	395	422	283	271	181	218
Aggf1	1677	1290	1216	1504	1601	1430	1471	1499	1121	1014	586	900
Agk	812	656	698	774	937	792	746	804	674	666	583	705
Agl	2021	1462	1401	1860	2384	1957	1810	1720	1497	1324	915	1331
Ago1	1142	920	798	1126	1297	1107	977	841	686	721	505	740
Ago2	8346	5785	5147	6234	7574	5900	6621	5434	4447	4849	3018	5380
Ago3	329	244	192	246	290	241	213	204	155	209	169	237
Agpat1	3498	2670	2409	3513	3643	3059	2836	2990	2162	2090	1366	1967
Agpat2	641	535	558	668	730	557	638	650	559	629	583	705
Agpat3	4151	3067	3199	4007	4482	4116	3389	3496	2865	2737	2069	2758
Agpat4	406	285	266	393	426	409	316	401	337	326	312	314
Agpat5	2174	1666	1577	1803	2151	1926	1929	1964	1875	2004	1696	2074
Agps	2981	2242	2197	2789	3405	2874	2810	2941	2973	3082	2454	2901
Agrn	2252	1725	1526	1869	2111	1814	1525	1453	1160	1103	873	1080
Agt	189	209	136	174	259	242	269	326	209	162	158	182
Agtpbp1	245	160	169	214	235	196	184	155	131	128	97	145
Agtrap	339	308	285	358	330	318	335	363	328	281	247	351
Ahctf1	3565	2610	2420	3014	3739	3011	2851	2683	2226	2192	1527	2135
Ahcy	8960	6886	6741	8747	9274	8083	7508	7626	6558	6640	5564	6764
Ahcyl1	4772	3740	3301	4034	5180	4059	4351	4121	3813	3639	2537	3373
Ahcyl2	1729	1222	1269	1585	1832	1400	1417	1313	1251	1185	778	1242
Ahdc1	867	668	683	791	836	762	547	496	405	476	258	468
Ahi1	1443	1126	949	1166	1416	1120	1168	1175	898	884	684	794
Ahnak	251	198	284	261	511	315	175	122	199	305	192	406
Ahnak2	666	428	416	448	506	350	419	366	275	375	308	458
Ahr	289	239	204	258	262	220	239	185	206	185	118	183
Ahrr	51	19	35	31	49	26	40	27	31	33	35	50
Ahsa1	4972	4267	4164	4967	5032	4742	5003	5376	4804	4672	4376	5374
Ahsa2	1461	1231	1103	1320	1525	1407	1411	1343	985	966	812	906
AI182371	1	1	2	0	3	0	0	0	0	1	1	1
AI197445	5	1	0	4	5	0	2	3	6	1	0	0
AI314180	4735	3358	3212	4185	5089	3983	4576	4404	3978	3844	2467	3384
AI413582	490	561	669	831	731	676	583	680	803	973	966	1538
AI427809	6	0	3	3	9	8	4	3	4	1	6	15
AI429214	45	27	21	42	33	47	37	42	45	54	49	57
AI464131	76	62	53	70	91	87	51	71	39	49	36	57
AI480526	7	10	9	12	4	2	8	5	10	6	13	7
AI506816	15721	12932	12146	14218	14130	13881	11595	11413	8892	8599	6742	9853
AI597479	1041	834	823	937	1148	946	852	944	978	918	1015	1176
AI606181	107	62	65	56	115	61	73	60	47	45	38	72
AI662270	1337	1095	1097	1288	1441	1407	1288	1524	1424	1523	1585	2058
AI837181	447	392	406	518	556	475	419	420	341	386	293	383
AI839979	9	4	2	3	3	2	3	4	0	3	7	4
AI846148	654	522	474	653	682	640	551	613	515	498	465	607
AI847159	0	2	0	0	2	2	2	2	2	0	1	0
AI987944	224	179	179	248	336	279	221	282	313	327	382	388
Aida	1239	914	949	1177	1337	1227	1375	1482	1433	1462	1548	1807
Aif1l	463	434	317	426	412	430	389	462	313	286	271	373
Aifm1	1604	1294	1409	1734	1661	1654	1408	1550	1369	1097	961	1176
Aifm2	255	202	189	261	353	248	305	266	250	283	218	274
Aig1	129	92	83	117	80	115	128	115	114	123	76	98
Aim2	2	0	6	5	2	0	2	0	5	5	8	3
Aimp1	2046	1704	1885	2234	2521	2194	2170	2507	2510	2671	2799	3443
Aimp2	1010	921	902	1175	1306	1120	1075	1208	1280	1432	1519	1804
Aip	1259	1110	1055	1334	1385	1145	1203	1279	1160	1280	1243	1490
Aipl1	7	4	7	3	6	11	3	2	2	3	3	1
Airn	21	18	18	15	8	17	21	21	8	9	7	13
Ajuba	2854	2330	2124	2924	3488	2794	2450	2463	1975	1822	1428	1723
Ak1	488	432	374	390	576	488	308	286	209	168	166	264
AK157302	5	0	0	2	1	3	4	1	0	2	0	1
Ak2	3502	3067	3071	3936	3903	3706	3722	3907	3518	3301	2912	4053
Ak3	2508	1786	1764	2202	2856	2185	2409	2640	2197	2278	1675	2118
Ak4	342	277	246	318	323	345	335	349	229	219	266	335
Ak5	57	39	18	33	13	13	15	33	19	14	16	22
Ak6	3018	2657	2428	3061	3254	2995	3225	3571	3187	3434	3364	4393
Ak8	2	0	3	1	1	2	2	5	7	5	3	0
Akap1	2258	1767	1716	2230	2294	2035	1978	1724	1600	1569	1389	1627
Akap10	1153	830	892	1150	1142	1041	953	1048	1002	902	877	1030
Akap11	1738	1300	1079	1239	1614	1413	1398	1323	1052	1088	781	1030
Akap12	1831	1382	1008	1341	1529	1209	1031	1016	560	444	363	631
Akap13	586	444	387	398	495	383	371	302	200	217	149	341
Akap17b	122	81	66	102	130	80	67	110	64	67	48	65
Akap2	6176	3959	4445	5679	6714	5465	4550	4231	4015	3626	2530	4291
Akap5	12	7	2	4	8	1	10	8	5	2	1	7
Akap6	206	134	109	158	233	230	116	139	68	77	81	120
Akap7	481	366	481	546	661	497	480	583	557	659	539	718
Akap8	4085	3166	2960	3753	4082	3619	3403	3326	2771	2422	1886	2558
Akap8l	572	497	435	526	522	472	511	476	405	395	363	461
Akap9	1712	1267	1020	1313	1745	1233	1411	1130	909	934	742	916
Akip1	655	525	494	613	677	646	631	639	549	623	459	667
Akirin1	1060	804	845	921	1222	1064	1028	1220	1040	1192	1126	1329
Akirin2	1085	876	822	917	1116	973	833	956	853	809	655	847
Akna	444	324	312	470	544	407	290	289	248	246	180	308
Akr1a1	11816	9599	9654	11275	11766	10660	11331	11996	10013	9883	8579	10806
Akr1b10	479	407	463	483	526	498	670	701	764	738	725	912
Akr1b3	4325	3729	4062	5021	4890	4933	4788	5213	4921	5422	5945	7068
Akr1b8	1073	846	960	1212	1342	1240	1094	996	950	947	908	1076
Akr1c12	2	3	4	1	13	3	0	3	2	2	7	5
Akr1c13	176	150	176	217	228	171	193	216	254	225	326	370
Akr1e1	575	503	462	606	618	565	599	655	625	716	639	771
Akr7a5	606	409	499	571	623	557	533	578	487	439	430	438
Akt1	26689	21237	19769	23851	26655	23598	23370	24033	18462	17484	13461	18602
Akt1s1	2805	2427	2572	3306	3247	2927	2538	2709	2264	2391	1629	2324
Akt2	3518	2684	2402	3139	4057	3131	2886	3064	2610	2374	1806	2521
Akt2-ps	0	2	2	5	2	3	5	1	1	1	2	2
Akt3	530	398	305	390	454	379	410	444	363	362	283	328
Aktip	498	410	423	468	559	468	385	390	375	472	448	513
Alad	643	646	650	742	821	802	653	749	723	891	688	950
Alas1	935	702	820	984	1038	929	749	722	789	711	678	836
Alcam	672	466	387	412	497	476	445	396	296	315	225	273
Aldh16a1	1093	838	926	1156	1265	1111	1001	1137	967	951	635	753
Aldh18a1	2644	2125	2057	2675	3141	2768	2182	2211	1824	1639	1320	1929
Aldh1a1	3	1	0	0	13	7	0	1	0	0	17	25
Aldh1a3	232	188	127	145	155	132	147	122	73	50	60	74
Aldh1a7	0	0	0	1	1	1	1	2	0	1	3	1
Aldh1b1	28	20	26	56	41	58	36	29	16	27	37	37
Aldh1l1	1330	1115	1083	1364	1348	1216	1356	1371	1249	1094	736	963
Aldh1l2	1157	927	1045	1170	1706	1535	885	830	791	694	669	912
Aldh2	4723	4508	3804	4432	3773	3643	4099	4381	2721	2768	2179	2804
Aldh3a2	631	457	469	532	679	563	517	606	510	454	407	409
Aldh3b1	232	155	144	208	160	122	167	169	116	95	82	101
Aldh4a1	1034	876	757	963	1152	933	908	990	844	861	654	811
Aldh5a1	354	253	267	301	312	282	242	284	208	218	121	196
Aldh6a1	220	157	111	184	211	130	204	243	171	171	132	159
Aldh7a1	830	659	610	785	762	687	692	732	617	566	514	599
Aldh9a1	2995	2472	2505	3019	3176	3057	2996	3180	2987	2986	3158	3234
Aldoa	39438	32221	32559	40809	47484	42708	38928	41662	37077	36801	32917	39574
Aldoc	299	281	223	242	278	243	446	380	278	316	313	350
Alg1	724	621	560	688	842	758	738	706	713	764	604	732
Alg11	540	361	358	443	584	480	442	513	506	593	564	665
Alg12	234	193	200	257	269	271	252	290	252	314	232	321
Alg13	319	302	314	370	418	347	356	404	393	414	333	491
Alg14	928	677	655	699	858	815	767	898	733	795	641	836
Alg2	1731	1322	1360	1781	1913	1688	1761	1730	1825	1821	1548	1620
Alg3	480	332	332	438	445	382	414	345	400	369	212	336
Alg5	1411	1036	1180	1332	1512	1206	1350	1633	1696	1876	1875	2221
Alg6	973	698	764	983	1217	951	999	957	1180	1209	1116	1365
Alg8	642	562	489	623	678	578	568	621	577	504	414	540
Alg9	933	791	768	917	1039	964	950	903	777	797	637	775
Alkbh1	425	379	401	463	473	374	384	493	485	543	531	653
Alkbh2	164	152	146	152	156	146	158	224	186	204	225	248
Alkbh3	644	480	522	658	684	674	632	760	677	728	831	940
Alkbh4	135	87	126	146	175	128	138	168	131	175	144	202
Alkbh5	5093	4032	3944	5204	6409	5021	4887	4723	4256	4070	2481	3673
Alkbh6	346	336	396	410	413	399	374	413	324	397	358	557
Alkbh7	447	522	540	716	731	680	719	758	870	1002	987	1384
Alkbh8	1037	775	820	1023	1211	1045	954	989	942	968	852	1127
Alms1	1132	751	710	972	1236	958	1047	901	848	778	564	822
Alox5ap	6	6	1	7	3	6	8	4	8	3	1	1
Alox8	1	0	2	2	1	2	4	2	0	1	0	1
Aloxe3	3	0	5	3	4	0	8	1	3	0	0	0
Alpk1	48	54	39	73	42	47	54	74	57	41	54	75
Als2	3178	2284	2161	2674	3188	2557	2593	2444	2051	1802	1214	1681
Als2cl	82	43	77	58	50	34	72	46	49	48	22	46
Alx1	631	551	508	647	637	621	588	661	580	589	613	812
Alx4	1	6	1	0	9	1	1	0	0	0	2	1
Alyref	4534	4079	4096	5315	5337	4900	4586	4914	5001	4737	4391	4892
Alyref2	27	27	38	25	24	27	15	15	24	31	32	41
Amacr	381	233	280	313	344	317	278	327	356	351	316	381
Ambra1	1559	1135	1118	1434	1746	1374	1291	1234	1000	1033	618	1112
Amd-ps3	37	35	24	32	50	51	37	61	46	56	46	53
Amd1	5163	3972	3402	4338	5226	4430	5110	5581	4592	4737	4349	5319
Amd2	34	26	29	32	51	28	21	28	47	19	43	26
Amdhd1	17	14	9	21	13	7	9	9	14	15	13	14
Amdhd2	860	727	721	892	909	919	904	824	851	818	624	815
Amer1	131	86	113	110	158	137	146	160	126	138	75	114
Amfr	6040	4569	4649	5709	6389	5376	5761	6057	5632	5592	4266	4885
Amh	8	7	2	2	5	7	7	8	4	6	8	5
Amhr2	0	1	4	3	5	1	2	2	1	0	2	1
Amigo1	15	20	20	23	16	21	12	16	6	2	8	13
Amigo3	37	17	22	30	54	37	26	33	16	35	34	43
Ammecr1	406	311	352	445	457	427	333	388	390	350	214	345
Ammecr1l	1119	935	773	1005	1211	1071	980	998	798	751	591	831
Amn	1	1	4	7	7	6	2	4	1	3	4	10
Amn1	140	134	159	184	175	169	150	156	229	221	275	378
Amot	261	189	175	195	176	178	218	170	142	136	99	164
Amotl1	6790	4716	4137	4990	6805	5186	4984	4740	3451	3308	2302	3549
Amotl2	1917	1505	1436	1618	1699	1603	1413	1410	975	1068	735	1133
Ampd1	5	3	3	3	2	1	2	7	0	1	4	1
Ampd2	2259	1687	1591	1877	1934	1859	1713	1655	1280	1203	900	1356
Ampd3	92	74	104	139	135	147	56	41	51	89	51	91
Amt	13	11	2	10	10	9	8	6	9	12	11	11
Amz1	35	26	24	17	36	34	18	27	19	21	25	48
Amz2	876	709	693	853	908	813	853	891	663	693	509	782
Anapc1	7491	5319	4970	6298	7565	5826	5704	5483	4623	4462	3014	4522
Anapc10	195	162	207	185	231	240	245	233	260	297	351	482
Anapc11	1346	1377	1282	1510	1503	1358	1356	1452	1409	1521	1534	2230
Anapc13	490	541	555	559	431	504	503	509	487	562	557	815
Anapc15	546	472	476	463	532	499	506	575	398	487	481	654
Anapc16	1136	1203	1107	1222	1331	1242	1178	1396	1215	1370	1456	2059
Anapc2	1592	1143	1168	1593	1710	1494	1321	1430	1215	1193	819	1038
Anapc4	2521	2093	1962	2526	2946	2463	2294	2307	2289	2230	1888	2420
Anapc5	10434	7744	7351	9279	11006	8930	7648	7856	6240	5826	4838	6001
Anapc7	2289	2067	2028	2563	2671	2477	2375	2569	2376	2142	1931	2203
Angel1	148	93	94	106	145	102	106	151	87	99	59	94
Angel2	895	685	680	908	1029	886	826	797	866	796	679	797
Angpt1	1	1	0	0	2	0	6	12	4	6	10	9
Angpt2	833	704	667	756	911	733	562	598	483	439	403	467
Angpt4	1	7	3	1	0	3	0	0	2	2	2	5
Angptl2	2946	2142	1675	2094	2000	1844	2009	1942	1442	1180	903	1251
Angptl6	41	32	42	57	43	43	37	43	31	48	35	41
Ank	499	317	307	398	482	334	436	339	292	282	180	259
Ank1	1	2	5	4	1	4	1	2	1	3	0	7
Ank2	1344	1013	1036	1124	1556	1212	1007	996	732	777	499	885
Ank3	39	11	11	25	17	27	19	27	12	19	11	11
Ankdd1b	4	2	2	6	2	4	6	6	2	2	4	6
Ankef1	1	3	5	4	6	0	3	3	2	5	2	3
Ankfn1	2139	1614	1455	1771	2132	1691	1849	1646	1321	1292	830	1289
Ankfy1	2247	1669	1733	2138	2931	2269	2417	2342	2195	2119	1509	2057
Ankhd1	2138	1694	1514	1983	2222	1890	1870	1619	1344	1353	865	1381
Ankib1	2554	1891	1773	2055	2498	2224	2241	2173	1889	1854	1269	1808
Ankle1	176	169	148	129	141	134	157	156	160	163	154	168
Ankle2	954	730	634	820	1131	912	875	793	828	818	711	741
Ankmy1	0	2	0	2	2	2	1	1	5	7	1	1
Ankmy2	668	491	525	618	659	613	629	579	560	576	438	594
Ankra2	188	176	183	198	199	168	161	197	162	155	174	212
Ankrd10	857	650	656	651	775	654	577	662	602	771	655	753
Ankrd11	6598	5005	4539	5771	6305	5185	4710	4224	3160	3315	2097	3447
Ankrd12	662	455	394	451	527	473	532	471	465	342	295	485
Ankrd13a	2537	1986	1736	2493	2736	2317	2303	2104	1786	1762	1156	1643
Ankrd13b	1042	802	765	894	907	871	688	706	464	501	397	624
Ankrd13c	2032	1561	1625	1914	2219	2091	1920	2002	1860	1791	1515	1840
Ankrd13d	8	23	13	9	10	13	10	8	14	7	8	11
Ankrd16	135	163	158	167	164	138	158	143	162	168	191	230
Ankrd17	4221	3115	2669	3396	4095	3396	3205	2979	2272	2283	1438	2478
Ankrd2	83	71	85	129	124	111	88	143	79	73	91	143
Ankrd23	54	49	49	46	77	65	39	49	54	75	84	70
Ankrd24	103	79	111	99	107	105	93	106	87	108	130	129
Ankrd26	965	729	737	807	904	731	771	642	600	640	353	599
Ankrd27	1245	1047	970	1380	1570	1247	1083	1108	1009	1064	1006	1136
Ankrd28	2361	1648	1500	2107	2556	2004	2099	2124	2038	2066	1646	1940
Ankrd29	113	100	90	116	165	155	107	124	124	114	115	124
Ankrd34a	262	183	150	161	180	148	178	198	115	95	74	105
Ankrd37	12	9	18	7	6	10	13	8	15	14	6	9
Ankrd39	269	284	302	314	288	319	264	356	313	279	358	414
Ankrd40	3150	2519	2264	2860	3118	2640	2618	2716	1957	2014	1551	2214
Ankrd42	28	35	27	33	45	43	41	37	36	23	10	24
Ankrd44	346	226	162	231	296	202	252	284	177	175	116	138
Ankrd46	1008	759	788	895	1120	931	900	982	832	798	593	819
Ankrd49	491	398	391	545	580	530	514	532	593	656	754	838
Ankrd50	2235	1767	1361	1684	2080	1699	1927	1571	1234	1158	786	1156
Ankrd52	4335	3354	2682	3269	3565	2904	3075	2841	1863	2015	1178	2049
Ankrd53	0	0	1	5	3	5	5	3	0	0	7	3
Ankrd54	625	507	451	587	727	619	558	549	478	476	330	471
Ankrd6	15	24	23	13	18	27	31	18	17	8	0	13
Ankrd61	3	0	1	2	3	2	1	0	2	0	1	7
Ankrd9	184	173	136	193	231	190	156	190	177	148	112	160
Anks1	1020	759	780	990	946	855	881	756	638	609	361	631
Anks1b	1	0	1	2	0	1	1	0	2	4	0	0
Anks3	294	310	259	318	282	280	279	303	255	259	249	283
Anks6	61	77	74	106	106	82	59	61	52	36	29	46
Ankzf1	171	122	139	206	192	164	141	162	175	163	123	168
Anln	6443	4788	4360	5676	6975	5886	5207	5620	5123	4946	3449	4204
Ano1	17	29	15	16	17	15	8	12	9	14	12	15
Ano10	857	541	579	689	909	688	631	646	527	548	388	498
Ano2	3	4	0	1	0	1	0	2	1	4	0	0
Ano3	695	432	379	505	532	501	555	619	455	473	446	505
Ano6	2235	1591	1574	1980	2549	1929	1808	1684	1548	1448	899	1414
Ano8	893	728	740	958	1039	974	651	685	600	590	480	618
Anp32a	3399	3099	2906	3506	2886	3159	3213	3183	2371	2200	1634	2261
Anp32b	11085	9310	9349	11117	11558	10476	10527	10917	8370	7874	6069	8247
Anp32b-ps1	0	1	2	3	2	1	1	2	0	2	1	2
Anp32e	10332	9057	8344	9868	9383	9202	9511	9489	6999	6377	4329	6169
Anpep	29	23	44	35	35	52	20	17	29	15	9	32
Antxr1	1087	899	809	999	1167	949	857	806	660	637	471	643
Antxr2	1132	814	787	909	1146	1023	891	840	623	659	544	719
Anxa1	3336	2883	4500	5262	7080	6878	2277	2572	3610	4112	4931	6269
Anxa11	1624	1133	1189	1471	1729	1363	1348	1361	981	1060	677	1000
Anxa11os	1	1	1	2	5	0	0	6	4	4	2	8
Anxa2	3159	2652	2785	3338	3884	3658	2555	2731	2664	2591	2863	3450
Anxa4	715	640	992	1114	1183	1077	718	760	1138	1129	953	1054
Anxa5	9023	7779	7298	8406	9186	8529	7369	7697	5983	5805	5084	6785
Anxa6	1090	883	964	1058	1317	1200	802	826	613	642	486	690
Anxa7	977	806	837	982	1219	1066	1010	1135	1013	1134	1118	1214
Anxa9	75	51	65	84	75	55	53	74	62	72	35	65
Aoc2	50	50	41	44	40	44	68	47	35	47	24	53
Aoc3	6	3	5	1	11	0	1	5	4	7	5	0
Aox1	151	96	101	130	151	144	109	100	95	105	84	102
Ap1ar	1610	1346	1248	1459	1611	1264	1456	1549	1291	1193	890	1143
Ap1b1	3306	2604	2525	3286	3597	3129	2915	2736	2483	2448	1496	2197
Ap1g1	3074	2420	2167	2966	3292	2656	2728	2758	2466	2421	1500	2144
Ap1g2	288	244	280	282	351	257	317	312	269	230	167	268
Ap1m1	1831	1590	1537	1885	1988	1796	1693	1858	1627	1685	1474	1765
Ap1s1	3392	2870	2858	3589	3550	3413	3093	3448	2947	2886	2733	3372
Ap1s2	862	627	529	611	682	721	889	997	841	929	631	849
Ap1s3	91	79	48	65	81	80	88	105	93	74	57	78
Ap2a1	4664	3499	3492	4244	4842	4089	3715	3605	2943	2825	1739	2917
Ap2a2	2563	1946	2075	2504	2990	2601	2315	2247	1748	1766	1282	1693
Ap2b1	5641	3987	4066	5410	6504	5152	4806	4525	3926	3695	2328	3601
Ap2m1	8770	7455	7498	10002	9551	8858	8054	8450	7373	7193	6033	8073
Ap2s1	2450	2217	2316	2558	2614	2473	2432	2575	2256	2212	2155	2716
Ap3b1	2888	2287	2248	2895	3179	2822	2545	2670	2424	2312	1535	1974
Ap3d1	5752	4452	4063	5653	6566	5146	4973	4858	4190	4042	2502	3979
Ap3m1	2237	1719	1612	1897	2238	1989	2163	2105	1808	1772	1556	1780
Ap3m1-ps	4	4	2	1	4	1	2	1	2	1	3	2
Ap3m2	223	170	137	192	201	160	232	239	210	182	185	183
Ap3s1	1302	1116	919	1128	1305	1206	1316	1445	1160	1349	1327	1597
Ap3s1-ps1	1	3	0	1	0	2	0	1	1	0	2	0
Ap3s2	1721	1417	1404	1705	1833	1554	1584	1649	1504	1548	1421	1716
Ap4b1	438	338	433	521	486	473	470	489	474	410	443	454
Ap4e1	591	424	367	470	618	529	496	531	441	412	324	432
Ap4m1	355	332	295	368	397	290	319	311	233	275	219	298
Ap4s1	397	373	385	439	402	399	452	524	463	488	461	594
Ap5b1	181	149	165	175	263	204	181	185	149	141	110	138
Ap5m1	490	385	356	427	515	452	533	557	486	465	458	551
Ap5s1	186	121	164	167	211	162	155	126	123	115	120	150
Ap5z1	542	444	432	514	570	490	388	438	401	304	268	358
Apaf1	2023	1338	1192	1555	1821	1524	1487	1410	1030	1038	622	1010
Apba1	13	8	6	3	6	4	7	10	5	2	1	2
Apba3	661	700	726	934	1033	860	719	756	655	630	529	736
Apbb1	23	20	18	26	30	36	17	17	24	28	23	12
Apbb1ip	7	4	10	7	4	9	7	5	12	3	7	5
Apbb2	444	362	392	420	610	432	412	321	307	359	222	357
Apc	3373	2282	2100	2554	3378	2588	2443	2029	1733	1571	1187	1898
Apc2	8	4	3	5	5	5	6	6	0	5	4	8
Apeh	1135	812	823	1093	1176	977	1006	1084	936	873	658	833
Apex1	2153	1853	1935	2559	2432	2212	2001	2324	1825	1791	1505	1840
Apex2	209	139	115	161	164	159	176	112	157	96	136	145
Aph1a	4836	3764	3841	4818	4720	4328	4043	3998	3399	3250	2474	3358
Aph1b	275	190	182	236	266	213	249	262	188	196	168	248
Aph1c	2138	1476	1716	1845	2079	1875	2176	2408	2669	2751	2474	2962
Api5	5488	3992	3739	4895	5867	5058	4776	5110	4586	4475	3702	4623
Apip	558	496	497	593	691	591	581	719	778	847	923	1250
Aplf	656	494	544	698	678	607	590	536	451	480	383	513
Apln	37	38	18	19	17	16	21	20	8	24	6	11
Aplp2	9796	7239	6738	8156	8927	7776	7229	7347	5220	5010	3544	5081
Apmap	758	598	611	775	798	726	636	688	604	587	522	696
Apoa2	16	14	7	12	11	16	11	16	14	20	18	12
Apobec1	27	27	29	44	52	45	115	87	121	120	118	148
Apobec2	3	1	5	7	1	0	3	2	1	2	1	2
Apobec3	0	2	4	1	0	5	0	0	4	3	2	2
Apobr	8	24	26	26	22	25	11	9	23	14	8	6
Apod	12	3	5	11	2	5	5	12	14	6	0	3
Apoe	20986	18346	17974	21521	19924	18510	19420	20380	17302	17193	13777	17172
Apol10b	0	0	1	0	0	0	15	15	21	15	33	32
Apol7d	0	0	0	3	3	1	0	1	0	2	3	3
Apol8	5	0	4	1	0	4	2	1	0	3	4	0
Apol9a	6	2	1	4	0	6	202	192	249	213	299	320
Apol9b	2	0	1	7	2	2	231	188	235	226	276	324
Apold1	2137	1647	1603	1853	2265	1909	1762	1913	1802	1880	1702	1951
Apom	2	2	0	9	2	5	2	0	0	3	1	0
Apon	17	6	5	10	2	2	5	2	5	0	5	5
Apoo	659	593	599	621	641	724	685	851	746	918	967	1337
Apoo-ps	0	0	1	0	5	4	4	4	4	3	0	7
Apool	107	93	125	147	145	167	133	180	150	209	169	203
Apopt1	899	852	879	1100	1025	920	913	926	1030	1145	1260	1672
App	6078	4843	5001	6149	6578	5821	6264	6029	5413	5084	3952	5126
Appbp2	3861	2620	2452	2923	3922	3299	3131	3252	3147	2942	2542	3026
Appbp2os	31	17	19	4	86	31	22	31	19	45	28	44
Appl1	555	464	420	425	627	524	474	496	493	489	409	535
Appl2	1036	860	838	884	891	809	816	889	758	693	568	783
Aprt	1903	1784	1833	1901	1956	1994	1580	1718	1522	1733	1778	2223
Aptx	443	389	334	406	424	420	467	494	405	461	484	595
Aqp1	22	12	12	32	18	18	14	9	12	6	1	6
Aqp11	43	35	21	29	33	26	73	62	39	35	28	45
Aqp4	18	9	5	11	14	19	10	7	5	7	7	4
Aqp5	13	0	3	3	3	3	1	0	3	4	3	0
Aqr	2712	1894	2002	2315	2535	2183	2113	1931	1409	1651	939	1593
Araf	1382	1252	1202	1417	1669	1394	1564	1599	1361	1456	1257	1598
Arap1	677	545	566	744	726	669	559	525	428	384	331	504
Arap2	871	684	546	744	829	628	794	650	600	602	452	526
Arap3	64	51	66	64	87	74	60	31	34	37	13	17
Arcn1	7051	5139	5115	6666	7635	6538	6492	6743	6553	6335	4919	6258
Arel1	1283	1099	954	1100	1292	1091	1362	1277	1059	1018	727	1099
Arf1	10238	9396	9704	11592	11335	10588	9911	9993	9787	9706	8672	11187
Arf2	1194	960	862	1017	1165	1059	1140	1205	1039	1053	964	1245
Arf3	6235	4941	4413	5868	6671	5524	5969	5807	4622	4669	3037	4790
Arf4	5112	3972	3764	4573	5407	4631	5069	5507	5337	5665	5231	6224
Arf5	2608	2283	2650	3375	3461	3022	2659	2862	2960	3191	2729	3267
Arf6	4289	3784	4016	5206	5394	4654	4037	4068	3820	3780	2471	3433
Arfgap1	1422	1169	1169	1477	1597	1323	1283	1233	1206	1018	834	1134
Arfgap2	2744	2089	2266	2521	2885	2424	2388	2606	2369	2553	2228	2666
Arfgap3	513	404	411	486	570	561	507	453	523	483	441	467
Arfgef1	3298	2271	2171	2669	3700	2904	2808	2643	2401	2228	1765	2352
Arfgef2	2192	1606	1444	1813	2285	1742	1789	1615	1310	1170	851	1327
Arfgef3	1864	1239	915	1025	1120	844	1551	1100	701	721	431	697
Arfip1	2122	1594	1544	1806	2188	2010	1934	2049	1949	1849	1530	1761
Arfip2	1757	1595	1439	1889	1902	1677	1812	1877	1575	1621	1395	1658
Arfrp1	554	457	470	512	609	537	572	595	527	629	558	634
Arg2	0	2	1	1	0	3	2	4	3	3	1	4
Arglu1	1315	1123	1005	1447	1438	1243	1202	1246	1131	1130	853	1068
Arhgap1	1997	1738	1475	1748	1994	1638	1665	1713	1253	1255	836	1238
Arhgap10	981	761	809	1000	1074	860	906	921	757	717	476	651
Arhgap11a	3000	2434	2228	2887	3003	2543	2451	2357	1893	1833	1369	1915
Arhgap12	644	559	466	626	692	659	666	657	605	598	532	678
Arhgap15	1	0	1	0	1	0	1	4	1	1	2	5
Arhgap17	614	454	547	665	731	573	499	488	476	404	279	465
Arhgap18	839	643	628	709	791	708	782	833	679	697	544	665
Arhgap19	1876	1393	1292	1575	1830	1609	1610	1527	1307	1289	924	1264
Arhgap20	11	6	5	9	3	2	2	5	3	3	2	2
Arhgap20os	2	0	0	3	3	0	1	1	0	1	4	6
Arhgap21	3508	2630	2165	2668	3441	2655	2751	2538	1824	1669	1188	2097
Arhgap23	1242	975	908	1121	1130	912	982	904	666	677	472	750
Arhgap26	118	91	99	110	139	113	88	89	64	63	70	94
Arhgap27	404	350	348	363	469	421	283	298	208	224	157	254
Arhgap28	153	116	127	172	225	186	125	152	90	141	104	129
Arhgap29	1286	967	937	1144	1353	1096	1158	1194	1143	972	826	965
Arhgap30	3917	2993	2982	3705	4130	3617	3286	3252	2797	2423	1721	2460
Arhgap31	3142	2196	2048	2580	2985	2125	2642	2304	1792	1760	1155	1870
Arhgap32	941	652	561	621	804	576	729	551	410	427	289	387
Arhgap33	8	3	11	1	8	9	4	9	3	1	1	5
Arhgap35	5087	3583	3195	4181	4885	3839	3542	3432	2504	2593	1693	2724
Arhgap39	1613	1296	1213	1537	1492	1353	1351	1222	1062	986	619	1041
Arhgap4	0	2	3	0	2	1	0	0	4	2	0	3
Arhgap42	533	359	362	434	563	462	402	407	389	394	263	411
Arhgap45	2	2	8	10	15	16	9	3	11	4	9	9
Arhgap5	2706	1928	1797	1907	2425	2140	2428	2634	2509	2586	2105	2505
Arhgap6	240	183	188	208	279	229	247	205	209	207	154	192
Arhgap8	1	2	1	0	3	1	0	1	0	0	5	2
Arhgap9	477	480	442	621	672	575	531	513	514	446	479	642
Arhgdia	28372	22630	22576	28133	31125	27120	24126	24563	19732	18841	13216	19182
Arhgdib	6825	6024	8038	9564	10759	10624	7344	8005	9618	10085	12737	15760
Arhgdig	0	5	6	6	7	2	2	6	3	1	2	0
Arhgef1	2497	2017	2084	2151	2572	2186	1828	1729	1362	1467	985	1421
Arhgef10	538	438	452	499	591	456	369	398	316	305	228	360
Arhgef10l	1301	1072	1007	1233	1588	1371	942	935	748	668	565	831
Arhgef11	2259	1675	1564	1964	2013	1605	1822	1745	1377	1327	868	1289
Arhgef12	5734	4084	3710	4614	5859	4509	4673	4204	3330	3403	2256	3620
Arhgef15	3	4	2	5	7	5	2	2	2	2	2	0
Arhgef16	4	0	10	12	11	2	3	6	9	6	2	6
Arhgef17	2102	1591	1430	1871	2305	1854	1565	1471	1018	981	655	1170
Arhgef18	1234	938	818	1034	1210	959	1116	1018	895	855	551	832
Arhgef19	128	103	80	108	164	130	57	96	57	46	32	73
Arhgef2	5014	3845	3945	4787	5657	4652	4127	4265	3640	3425	2605	3496
Arhgef25	293	336	312	328	320	278	245	282	214	270	205	250
Arhgef28	8	2	6	14	12	11	1	6	1	7	1	8
Arhgef37	45	23	34	40	33	39	47	63	39	48	56	53
Arhgef39	322	237	221	299	281	245	262	273	245	270	208	291
Arhgef4	46	42	49	65	76	65	24	31	38	22	42	43
Arhgef40	464	306	700	840	1212	1036	230	294	450	372	324	548
Arhgef5	57	41	25	50	33	33	54	52	36	44	19	40
Arhgef6	1	1	0	3	1	1	1	0	0	0	0	1
Arhgef7	1270	1055	1051	1345	1377	1265	1072	1033	891	801	619	998
Arhgef9	59	40	40	56	61	39	48	53	50	32	38	43
Arid1a	5039	3992	3422	4525	4861	3796	3799	3048	2199	2468	1509	2807
Arid1b	2228	1628	1504	1835	2338	1813	1795	1632	1487	1484	883	1496
Arid2	2486	1813	1750	2165	2489	2109	1936	1850	1527	1458	967	1475
Arid3a	322	228	285	309	377	300	268	258	234	225	159	218
Arid3b	50	35	46	69	77	53	48	56	33	36	36	49
Arid4a	789	574	509	638	695	556	614	527	468	464	280	398
Arid4b	559	437	382	456	535	463	542	514	422	411	298	405
Arid5a	269	227	244	263	322	263	308	300	320	297	188	287
Arid5b	397	305	304	360	401	385	368	319	214	206	156	231
Arih1	3186	2522	2497	2928	3617	3136	3027	3169	2768	2656	1995	2475
Arih2	1358	1082	1124	1429	1484	1329	1252	1328	1274	1175	805	1126
Arl1	3091	2564	2627	3167	3379	3471	3370	3819	4085	4829	5192	6427
Arl10	442	414	311	439	484	393	458	423	386	391	303	378
Arl11	220	161	184	198	239	237	191	177	191	225	229	296
Arl13b	290	180	246	260	352	310	236	296	220	218	247	213
Arl14ep	726	476	623	696	980	739	776	671	757	623	570	694
Arl15	430	327	265	297	347	384	336	427	335	318	251	351
Arl16	175	151	142	174	170	164	169	165	177	157	136	163
Arl2	849	848	852	977	893	879	915	999	943	963	846	1155
Arl2bp	2920	2345	2218	2836	2905	2534	2407	2521	2225	2342	1939	2503
Arl3	746	715	689	837	807	741	805	878	788	733	761	981
Arl4a	111	79	85	120	107	70	101	128	113	153	169	177
Arl4d	9	13	18	9	13	11	5	11	17	10	7	14
Arl5a	3346	2305	2169	2525	3396	2918	2688	2899	2634	2532	2286	2852
Arl5b	795	495	501	613	818	722	704	705	639	729	548	616
Arl5c	1	1	0	5	0	6	0	1	1	0	3	6
Arl6	376	296	290	326	357	312	347	461	468	490	536	612
Arl6ip1	7141	5437	4969	6216	7227	6045	7131	7612	6823	6821	7050	8098
Arl6ip4	1625	1223	1257	1545	1997	1437	1547	1735	1571	1697	1740	2169
Arl6ip5	1158	940	1189	1388	1765	1504	1241	1457	1496	1811	1959	2594
Arl6ip6	1023	756	742	828	874	809	856	869	917	975	902	1081
Arl8a	1544	1504	1316	1441	1361	1397	1325	1287	991	927	780	1196
Arl8b	4380	3378	3546	4615	5240	4615	4233	4428	4506	4905	4666	5435
Armc1	2165	1679	1503	1870	2317	2006	2128	2465	2198	2345	2495	2836
Armc10	758	606	647	829	849	794	792	848	752	766	826	1002
Armc2	113	86	125	177	142	129	108	113	112	150	107	144
Armc5	1108	904	879	999	1162	963	852	867	617	705	488	712
Armc6	438	371	390	457	509	462	391	441	435	417	371	465
Armc7	112	89	92	112	133	73	103	106	72	71	61	87
Armc8	756	595	620	763	887	797	677	813	712	823	661	834
Armc9	343	225	230	260	283	225	253	280	234	293	210	281
Armcx1	313	214	177	202	227	174	203	212	204	136	114	133
Armcx2	1639	1148	1293	1474	1726	1439	1370	1498	1444	1413	1172	1447
Armcx3	453	302	354	434	448	413	424	406	367	416	345	423
Armcx4	363	240	185	214	169	157	219	177	106	112	71	108
Armcx5	102	91	71	121	107	106	93	96	61	81	67	85
Armt1	653	466	517	577	701	565	548	646	605	560	473	565
Arnt	1679	1290	1329	1639	1763	1572	1655	1720	1499	1303	947	1343
Arnt2	36	24	22	30	32	49	24	21	16	13	5	9
Arntl	234	137	170	180	211	180	163	173	99	112	73	151
Arntl2	11	18	14	23	29	29	29	28	12	23	13	28
Arpc1a	2277	2171	2051	2476	2864	2527	2531	2748	2714	3054	2954	4087
Arpc1b	5692	5246	5515	6474	6509	6503	5463	5734	5587	5578	5236	6487
Arpc2	5528	4997	4725	6163	6255	5457	4976	5182	4585	4639	3483	4759
Arpc3	3101	2797	2815	3211	3065	3154	3176	3502	3130	3383	3480	4705
Arpc4	5467	5516	5727	7365	7351	6873	6213	6691	6606	7148	6734	8642
Arpc5	5784	5475	5235	6613	6721	6654	6830	7110	6885	7308	7182	9477
Arpc5l	1706	1564	1378	1748	1997	1816	1856	2001	1926	2010	2205	2790
Arpin	868	658	712	802	972	865	745	840	716	766	676	879
Arpp19	3446	3140	2847	3580	3371	3320	3555	3679	3445	3439	3561	4778
Arrb1	509	355	388	501	539	398	350	381	270	249	192	279
Arrb2	452	329	374	476	517	467	349	353	320	299	269	328
Arrdc1	164	151	153	142	160	153	220	157	150	176	168	149
Arrdc2	38	34	40	40	39	43	30	28	21	38	28	24
Arrdc3	437	312	291	388	452	392	369	483	506	443	377	411
Arsa	1019	813	780	911	1017	928	885	961	674	613	539	700
Arsb	2429	1753	1848	2205	2276	1953	2030	2160	1718	1454	1105	1427
Arsg	122	103	82	114	122	126	139	147	115	95	108	127
Arsk	105	89	90	102	138	113	113	94	134	148	151	146
Art1	3	8	1	1	7	3	6	11	11	10	15	14
Art3	70	39	39	30	37	21	67	48	18	52	32	27
Art4	12	7	4	11	10	8	10	7	6	4	3	8
Art5	27	23	40	35	63	54	22	37	51	38	42	63
Artn	14	5	3	13	14	20	9	8	3	10	2	11
Arv1	133	131	153	158	152	137	155	145	113	195	158	193
Arvcf	174	164	131	164	193	171	130	124	87	87	63	90
Arxes1	38	38	15	28	14	16	28	33	17	12	8	13
Asah1	2582	2246	2026	2411	2415	2320	2585	2872	2565	2547	2670	3291
Asah2	171	121	92	127	146	147	170	187	167	165	121	189
Asap1	2296	1649	1571	2153	2087	1876	1780	1704	1288	1237	830	1332
Asap2	641	460	379	445	495	432	399	376	251	260	195	287
Asap3	18	8	13	11	16	14	8	7	7	16	7	13
Asb1	712	505	496	588	724	645	647	754	644	591	381	530
Asb10	10	16	21	19	20	12	13	13	11	21	6	7
Asb13	218	228	184	247	277	249	304	261	264	227	211	308
Asb15	8	10	2	15	7	13	19	34	24	7	18	34
Asb2	26	27	8	19	28	9	21	36	13	13	1	12
Asb3	194	156	168	197	216	215	176	176	185	184	165	180
Asb4	7	6	3	2	6	4	13	9	5	8	1	3
Asb5	0	4	6	3	1	2	0	3	2	3	1	5
Asb6	1084	943	864	1168	1136	1020	917	927	888	770	611	835
Asb7	527	430	377	455	546	480	451	457	419	410	244	401
Asb8	754	726	679	741	867	849	726	804	720	757	628	877
Ascc1	412	410	399	466	496	448	436	514	430	486	461	513
Ascc2	2169	1643	1684	2119	2289	2004	1932	1841	1590	1602	1129	1688
Ascc3	1490	894	858	1118	1538	1236	1341	1232	1228	1099	727	1031
Ascl3	6	1	1	0	0	0	5	3	0	1	0	2
Asf1a	868	805	793	915	1028	918	1001	1060	1143	1210	1164	1468
Asf1b	1453	1139	1184	1395	1272	1257	1239	1332	1242	1173	926	1217
Ash1l	2518	1650	1472	1736	2054	1643	1671	1356	1099	1226	763	1361
Ash2l	4527	3736	3549	4237	4878	4211	4144	4417	4005	3899	3486	4074
Asic1	107	71	54	85	127	121	72	74	41	58	32	59
Asic3	6	2	2	4	0	3	0	3	0	1	0	4
Asl	1166	1103	1136	1383	1515	1345	1289	1287	1429	1410	1266	1421
Asna1	2947	2884	2846	3484	3089	3030	3067	3364	3122	3283	3170	4095
Asns	3203	2603	2818	3439	4289	3609	2648	3020	2693	2643	2338	2794
Asnsd1	2236	1765	1791	2107	2591	2285	2167	2502	2499	2712	2725	3063
Aspg	24	25	11	28	26	16	15	14	22	7	8	21
Asph	1920	1427	1421	1685	1824	1724	1784	1818	1621	1470	1245	1608
Asphd2	73	85	58	70	102	70	54	81	36	39	32	56
Aspm	2300	1603	1652	1988	2362	1925	1822	1506	1273	1402	898	1455
Aspscr1	1582	1340	1260	1625	1547	1345	1205	1302	1253	1029	851	1081
Asrgl1	331	242	275	293	283	263	288	303	274	240	184	223
Ass1	2034	1705	1418	1889	2322	1946	1608	1655	1417	1302	1379	1612
Aste1	163	156	132	187	192	177	160	191	183	224	164	189
Astl	3	2	1	6	0	2	0	4	2	9	5	0
Asxl1	3074	2354	2000	2601	2928	2322	2473	2251	1741	1706	1104	1809
Asxl2	1467	1150	1069	1358	1572	1277	1386	1278	1001	1017	702	1086
Atad1	2185	1633	1415	1555	1906	1710	1945	1981	1694	1687	1573	1924
Atad2	7283	5216	5074	5973	6555	5781	6079	5908	5338	5154	3827	5065
Atad2b	1219	853	788	1029	1226	989	1062	1003	797	727	513	717
Atad3a	1690	1368	1415	1740	1881	1684	1502	1526	1379	1249	1026	1352
Atad3aos	0	2	3	3	1	0	1	2	1	1	1	3
Atad5	1397	1096	978	1067	1472	1162	1294	1204	965	942	675	869
Atat1	163	167	138	146	168	168	150	151	120	122	134	100
Ate1	1569	1272	1228	1485	1704	1482	1473	1639	1308	1091	991	1227
Atf1	1504	1146	1264	1517	1666	1635	1398	1438	1359	1492	1290	1609
Atf1-ps	1	1	0	1	3	2	0	0	1	1	1	0
Atf2	1157	938	863	1000	1288	1059	1072	1110	1014	1010	737	1049
Atf3	83	62	93	95	171	157	105	89	154	151	171	241
Atf4	5523	5183	6270	6886	6932	6536	5015	5313	5016	5104	5260	6836
Atf5	1169	947	952	1146	1152	1066	888	823	522	487	435	616
Atf6	1286	855	808	1135	1358	1084	1215	1167	1127	1010	753	945
Atf6b	3637	3100	3297	3939	4214	3711	3572	3513	2649	2602	2021	2811
Atf7	1603	1153	959	1219	1418	1055	1208	1019	695	766	459	863
Atf7ip	1609	1093	1118	1333	1732	1166	1091	1026	1013	967	587	970
Atg10	106	63	66	75	82	67	86	110	87	107	85	111
Atg101	735	641	678	824	920	755	770	750	720	693	703	825
Atg12	475	393	382	448	492	433	432	582	528	580	605	784
Atg13	920	743	678	887	1142	848	825	838	701	741	502	652
Atg14	185	145	139	146	181	122	169	195	154	132	87	140
Atg16l1	634	559	538	689	731	611	640	709	636	667	555	646
Atg16l2	113	110	101	176	201	165	104	122	100	142	92	144
Atg2a	657	474	509	642	709	542	584	448	408	395	215	428
Atg2b	1608	1127	1111	1266	1615	1297	1295	1078	983	883	611	964
Atg3	1800	1640	1561	2003	2086	1969	1961	2040	1938	1888	1669	2219
Atg4a	702	651	539	615	640	599	882	941	808	995	961	1143
Atg4a-ps	0	0	1	2	0	0	2	4	0	4	3	5
Atg4b	949	802	853	984	1053	1012	958	1003	886	894	779	1039
Atg4c	318	232	215	291	352	281	273	305	256	245	206	257
Atg4d	1259	1058	1008	1338	1810	1458	1371	1523	1498	1526	1371	1574
Atg5	729	552	599	758	741	706	767	772	743	888	947	1033
Atg7	986	872	930	1143	1146	1058	965	878	883	779	502	871
Atg9a	1622	1211	1086	1361	1457	1212	1157	1116	698	671	533	711
Atg9b	11	4	4	10	22	11	8	13	2	1	10	8
Atic	7098	5560	5306	6998	7521	6614	5981	6130	5163	5089	4106	4993
Atl1	259	174	153	190	239	199	207	207	200	157	132	158
Atl2	1370	1117	1192	1510	1557	1469	1457	1511	1397	1495	1318	1578
Atl3	2206	1584	1650	1837	2336	2064	1965	2005	1741	1775	1275	1607
Atm	1480	928	893	1004	1195	1023	1212	1116	918	945	630	1063
Atmin	1163	775	729	1021	1068	910	881	935	702	702	397	694
Atn1	5308	4406	4934	5936	6146	5252	4075	3578	2887	2947	1994	3673
Atoh8	61	35	41	74	53	58	64	47	50	49	23	37
Atox1	1426	1486	1977	2041	1753	2106	1385	1563	1784	2029	2434	3724
Atp10b	11	8	10	8	8	6	5	8	2	3	3	3
Atp10d	35	18	19	31	33	22	26	19	36	25	15	51
Atp11a	7785	5639	5035	6077	7408	5949	6173	5685	4979	4804	3284	4860
Atp11b	1343	1047	886	1105	1395	1198	1255	1121	1039	914	804	1117
Atp11c	833	512	480	554	666	636	594	600	477	475	324	457
Atp13a1	2850	2149	2091	2651	3154	2538	2443	2517	2326	2057	1434	1992
Atp13a2	10614	8453	7716	9937	9694	7824	8215	8012	6075	5823	3574	5631
Atp13a3	6807	4702	4276	4975	6014	5225	4787	4658	3966	4126	2900	4020
Atp1a1	54435	40356	38496	49159	49884	41997	43728	42286	35724	33923	22120	31090
Atp1a3	5	8	9	18	29	16	10	4	10	8	9	11
Atp1b1	0	1	4	0	0	4	5	1	0	5	1	1
Atp1b2	10	9	2	0	13	1	3	8	7	3	3	3
Atp1b3	5323	4366	3978	4769	4947	4705	5246	5653	4995	5241	5260	6418
Atp23	148	102	107	147	132	139	131	173	148	165	169	198
Atp2a2	18417	14088	12988	16186	17851	15654	15015	14329	11786	11277	8280	11625
Atp2b1	2721	2008	1757	1996	2405	2097	1791	1766	1282	1246	890	1418
Atp2b4	40	33	19	30	20	25	22	21	20	8	8	9
Atp2c1	1414	1076	962	1123	1395	1185	1223	1243	1189	1039	882	1006
Atp5a1	24528	20003	19299	23857	28207	24470	23447	24842	21548	20970	18060	21700
Atp5b	44622	37516	35322	42070	46526	41698	42461	44748	36110	35700	31743	39409
Atp5c1	6669	5992	5723	7263	7734	7546	7133	8230	7323	8491	9333	11790
Atp5d	4928	4168	4093	4757	4722	4615	4130	4233	3567	3680	2869	3989
Atp5e	2705	2783	2732	2842	2600	2719	2731	3246	3086	3574	4064	6703
Atp5f1	7470	6887	6853	8188	7364	7601	8024	8921	8559	9298	10509	13308
Atp5g1	2956	2930	2938	3497	3426	3680	3017	3284	2820	3094	3364	4676
Atp5g2	4777	5189	5234	5504	4493	5028	4913	5261	4374	4466	4561	6339
Atp5g3	9292	8873	9468	10314	10214	10244	9509	10460	9794	10534	11013	16111
Atp5h	3256	2932	2908	3013	3215	3419	3104	3695	3402	3709	4179	6130
Atp5j	3450	3737	3803	4481	3828	3941	3625	4010	4124	4561	4306	6723
Atp5j2	2775	2505	2730	2616	2656	2697	2653	2855	2732	3175	3748	5460
Atp5k	706	1008	1019	1084	628	942	817	831	642	773	1092	1916
Atp5l	2317	2402	2261	2494	2197	2375	2216	2663	2555	2919	3377	5406
Atp5o	6807	5497	5574	6943	7687	6932	6567	7206	6961	7984	8650	10927
Atp5s	117	100	92	101	147	121	110	107	116	112	92	136
Atp6ap1	3454	2952	2637	3433	3271	3108	3258	3390	2774	2610	2164	2716
Atp6ap2	2369	2023	1857	2076	2183	2217	2492	2653	2540	2706	2457	2837
Atp6v0a1	5095	3660	3504	4182	4822	4025	3932	3729	2994	2837	1947	2889
Atp6v0a2	4275	3244	2920	3419	4106	3473	4557	4364	3762	3642	2796	3322
Atp6v0a4	118	99	87	111	145	127	116	87	78	97	99	119
Atp6v0b	4213	3753	3341	4344	4457	4276	4513	5086	5248	5800	6530	8788
Atp6v0c	20069	16407	18219	21380	23014	20979	17494	18350	16424	16724	13367	18107
Atp6v0d1	3076	2456	2562	3120	3113	2834	2956	3183	3072	3015	2272	2963
Atp6v0e	2144	2041	1944	2273	2284	2218	2319	2599	2324	2509	2780	3668
Atp6v0e2	3204	2719	2717	2927	2991	2753	2606	2794	2124	2112	1738	2399
Atp6v1a	9001	6706	6776	8525	9670	8372	8155	8567	7842	7375	5978	6859
Atp6v1b2	7935	6014	6173	7853	9066	7517	8023	8700	8298	8347	6831	7907
Atp6v1c1	4052	3319	3306	3996	4146	3558	3957	4234	4006	4380	3966	4804
Atp6v1d	2845	2461	2371	2890	3142	2672	2763	2812	2572	2600	1960	2455
Atp6v1e1	7056	5761	5426	6704	7223	6371	6321	7195	6329	6456	5799	7203
Atp6v1f	2653	2663	2888	3594	3645	3310	2849	3110	3614	4004	4172	5996
Atp6v1g1	5404	4893	4899	5915	5655	5334	5769	6369	6533	7049	7529	9943
Atp6v1g2	8	5	5	8	20	10	12	25	7	16	5	7
Atp6v1h	1803	1384	1602	1779	2050	1898	1739	2006	1797	1905	1976	2283
Atp7a	1394	1084	849	1084	1303	994	1254	1152	900	964	701	842
Atp7b	4	8	1	9	4	8	8	13	7	0	1	10
Atp8a1	314	228	198	190	263	243	321	337	292	311	207	299
Atp8b2	1141	895	824	1197	1337	1131	944	970	773	661	470	774
Atp8b3	3	0	2	2	7	3	0	1	0	3	2	5
Atp8b4	2	3	2	0	2	2	15	16	11	6	8	5
Atp8b5	1	5	0	4	0	0	1	1	2	0	1	2
Atp9a	2991	2406	2067	2679	3256	2420	2862	2885	2565	2272	1872	2400
Atp9b	760	614	559	705	879	743	573	665	639	526	407	565
Atpaf1	823	806	796	1022	1027	901	927	910	998	985	1002	1145
Atpaf2	712	581	581	703	873	779	699	720	678	731	580	700
Atpif1	1972	2243	2247	2345	2107	2405	2252	2638	2304	2821	2872	4539
Atr	674	421	441	580	759	587	580	561	517	540	321	511
Atraid	469	416	411	439	538	413	401	503	447	506	567	648
Atrip	429	348	360	410	517	434	432	404	439	417	333	481
Atrn	1963	1446	1299	1530	1909	1494	1572	1539	1152	1074	722	1181
Atrnl1	1483	1162	1082	1324	1492	1231	1151	1202	764	843	507	816
Atrx	8149	5354	5344	6107	7827	6228	6162	5705	4803	4661	3059	4698
Atxn1	181	128	120	160	222	189	152	140	121	145	82	114
Atxn10	4805	3611	3431	4106	4849	4230	4386	4708	4106	4272	3707	4175
Atxn1l	1625	1256	1203	1507	1504	1261	1323	1199	850	929	627	988
Atxn2	1884	1321	1237	1372	1663	1392	1334	1205	913	823	612	1021
Atxn2l	6368	5239	5200	6176	6130	5495	4623	4455	3510	3328	2367	4226
Atxn3	948	655	621	719	810	820	818	961	791	784	676	714
Atxn7	339	250	225	230	309	247	304	298	201	213	153	249
Atxn7l1	252	179	171	216	208	221	234	232	170	162	141	215
Atxn7l2	272	236	208	217	262	254	233	184	145	176	121	163
Atxn7l3	2084	1499	1389	1695	1953	1657	1531	1624	1244	1133	888	1271
Atxn7l3b	1875	1635	1240	1684	2063	1700	1628	1822	1484	1517	1335	1628
AU019823	605	449	451	552	611	500	491	539	559	572	570	730
AU020206	571	340	350	379	565	450	795	724	763	838	585	1090
AU022252	427	347	347	305	468	355	345	392	357	342	314	429
AU040320	890	738	721	897	1018	805	834	886	636	627	432	641
AU041133	56	49	34	57	65	66	55	51	64	98	115	112
Auh	381	273	277	309	280	315	346	418	342	304	288	394
Aunip	295	233	252	314	312	300	273	324	300	289	233	342
Aup1	4863	4126	4347	5355	5645	4825	4619	4886	4715	4619	4252	5274
Aurka	3027	2300	2280	2854	3105	2948	2722	2958	2526	2730	2548	2909
Aurkaip1	1160	921	899	1095	1443	1132	1099	1245	1291	1389	1410	1806
Aurkb	2954	2779	2721	3417	3208	3007	2656	2823	2585	2484	1865	2451
AV039307	0	1	1	1	0	1	0	1	1	5	0	1
AV099323	10	6	2	10	2	5	8	8	3	3	3	10
AV356131	5	4	6	3	10	9	5	0	6	2	4	23
Aven	1066	784	791	1071	1226	911	992	1083	951	812	697	840
Avl9	2160	1456	1524	1979	2492	1937	1999	2029	2201	2348	1847	2021
Avpi1	498	427	455	564	570	537	515	626	640	698	879	1176
AW011738	13	18	8	16	15	3	22	25	18	20	19	23
AW046200	10	1	11	0	7	3	3	3	1	1	2	5
AW146154	72	59	80	71	81	92	100	111	106	97	157	134
AW209491	351	337	284	383	471	379	350	382	341	474	448	568
AW549877	1302	985	848	1019	1237	1096	1247	1175	1093	1057	897	1142
AW554918	138	126	104	151	151	141	136	128	148	149	117	128
Awat2	3	12	2	1	4	5	5	5	6	9	7	13
Axin1	2088	1494	1526	1838	2133	1907	1843	1857	1565	1454	1257	1564
Axin2	216	231	203	272	274	242	336	266	282	225	155	210
Axl	148	94	167	220	361	331	185	174	251	217	184	300
AY036118	10249	7261	3523	5984	19373	13975	21326	19526	30648	20215	10944	8779
AY074887	1	2	0	1	1	0	0	1	1	1	0	5
Azgp1	55	39	39	46	17	28	40	51	42	25	34	42
Azi2	1247	918	1024	1115	1337	1194	1374	1344	1409	1499	1277	1456
Azin1	2676	1956	2100	2328	2732	2378	2416	2658	2541	2536	2194	2742
Azin2	51	21	33	47	40	36	22	29	52	19	32	60
B130021K23Rik	5	0	3	5	7	6	13	0	5	2	6	9
B130024G19Rik	6	3	5	1	1	0	0	3	5	0	1	4
B130034C11Rik	5	7	15	14	15	4	4	16	5	6	7	2
B130046B21Rik	1	3	2	11	6	1	2	12	3	15	1	13
B130055M24Rik	85	88	62	79	103	77	54	102	73	78	32	73
B230118H07Rik	393	376	350	490	505	426	467	475	486	463	432	542
B230206L02Rik	35	28	35	37	10	34	25	40	16	21	29	39
B230208H11Rik	34	20	37	30	39	23	33	31	18	27	23	25
B230216N24Rik	1	1	1	0	0	5	4	3	3	2	0	1
B230217C12Rik	133	99	99	95	128	116	89	93	92	81	75	121
B230217O12Rik	46	40	32	49	25	34	44	39	42	20	37	36
B230219D22Rik	1997	1535	1337	1617	1734	1660	1309	1465	1283	1282	1209	1409
B230307C23Rik	16	48	34	55	40	58	49	47	50	52	64	81
B230319C09Rik	0	1	1	2	2	1	0	2	0	3	3	2
B230354K17Rik	406	296	228	278	317	328	297	317	300	228	200	240
B230369F24Rik	4	7	3	2	1	7	1	0	2	3	2	7
B230377A18Rik	56	119	130	101	82	76	90	66	54	75	60	79
B2m	1779	1464	2368	2263	2486	2429	11810	11569	13261	12725	11048	15768
B330016D10Rik	26	22	32	12	18	20	43	28	15	28	18	28
B3galnt2	346	289	272	388	449	333	331	378	370	363	275	382
B3galt1	175	123	99	182	164	188	172	165	185	165	98	156
B3galt4	28	31	36	48	37	42	39	34	29	30	39	50
B3galt5	209	161	145	192	186	159	190	227	170	149	126	164
B3galt6	242	212	199	289	333	267	267	261	265	271	292	300
B3gat2	3	4	6	7	9	7	14	6	9	18	9	15
B3gat3	696	735	577	703	758	784	677	719	594	676	524	692
B3glct	661	518	464	611	655	557	555	543	487	446	335	492
B3gnt2	488	445	413	540	538	544	581	583	567	666	761	719
B3gnt3	57	66	52	113	129	93	84	101	100	88	79	106
B3gnt4	0	9	1	2	1	7	4	6	4	2	5	0
B3gnt7	2	5	0	1	7	2	0	3	1	3	2	0
B3gnt8	1	1	3	1	2	2	7	0	1	0	0	2
B3gnt9	150	152	117	177	202	177	161	117	133	110	131	120
B3gntl1	64	42	54	56	64	57	67	55	55	91	62	74
B430212C06Rik	11	4	1	8	2	18	9	3	1	1	9	3
B430218F22Rik	566	556	610	772	908	672	540	672	858	761	644	838
B430219N15Rik	3	3	3	6	8	0	2	0	1	2	0	0
B430305J03Rik	1228	1016	1058	1596	1643	1136	878	800	963	1058	678	921
B430319F04Rik	0	2	4	1	7	5	2	1	3	1	4	2
B4galnt1	0	3	0	0	11	0	3	1	2	0	0	2
B4galt1	701	633	530	632	837	700	710	791	676	628	559	674
B4galt2	290	271	198	270	252	257	163	178	143	162	117	132
B4galt3	533	478	442	571	600	549	539	527	511	470	331	510
B4galt4	147	108	88	91	91	110	83	140	103	101	58	110
B4galt5	1928	1410	1464	1770	2106	1796	1706	1728	1539	1681	1148	1606
B4galt6	845	610	553	661	827	584	692	624	494	449	311	464
B4galt7	550	494	408	576	577	498	555	543	522	576	490	515
B4gat1	361	322	298	370	469	328	316	317	333	332	302	371
B630019K06Rik	32	23	7	8	31	11	18	15	5	9	3	13
B930036N10Rik	5	3	5	11	13	5	2	2	10	3	5	5
B930082K07Rik	3	2	7	1	1	2	2	1	0	1	0	2
B930094E09Rik	27	21	28	34	40	31	13	5	9	38	23	22
B930095G15Rik	41	29	34	18	47	30	22	16	14	29	19	25
B9d1	145	175	191	215	192	219	163	199	257	246	304	381
B9d2	172	161	216	270	243	244	241	202	293	305	359	461
Baalc	4	6	3	2	10	6	1	10	1	5	4	0
Babam1	1933	1732	1697	2107	2101	1968	1936	1954	1902	1734	1662	1860
Babam2	607	481	573	594	697	632	468	520	497	487	369	501
Bace1	1231	859	737	919	1073	872	970	1022	824	704	546	771
Bace2	4047	3192	3269	4052	4086	3456	4893	5134	5030	4843	4035	5044
Bach1	868	690	778	950	1270	916	866	824	858	782	671	744
Bach2	64	64	51	47	89	72	53	56	51	27	16	33
Bach2os	3	1	2	5	0	1	2	2	5	0	0	0
Bad	474	464	513	559	471	524	543	547	499	540	559	732
Bag1	4210	3259	3065	3820	4427	3824	3940	4282	3759	4003	4008	4378
Bag2	1032	860	873	1033	1183	1124	977	1111	928	1025	941	1283
Bag3	1085	936	898	958	1125	976	960	947	771	749	512	899
Bag4	1026	828	716	947	1084	872	801	910	739	728	580	775
Bag5	1894	1633	1539	1718	1882	1655	1609	1631	1397	1516	1151	1377
Bag6	9819	7711	7129	9017	9889	8490	7995	7416	5480	5230	3436	5373
Bahcc1	2902	2054	1645	1962	2313	1715	1740	1404	919	1050	604	1075
Bahd1	784	599	586	679	850	693	619	636	451	447	291	473
Baiap2	628	500	544	594	580	525	426	446	366	372	265	378
Baiap2l1	573	432	445	466	516	467	545	510	374	383	298	339
Baiap2l2	15	13	14	5	9	5	9	6	2	5	5	10
Bak1	4284	3596	3171	4346	4999	4029	5467	5567	5000	4492	3619	4825
Bambi	338	237	238	320	306	269	251	345	260	276	319	335
Banf1	2706	2675	2610	3055	3024	3073	2714	3126	2847	2959	2862	4002
Banp	489	385	387	453	474	479	423	412	356	298	271	334
Bap1	2214	1729	1494	2002	2271	1957	2003	2003	1878	1891	1589	1881
Bard1	844	623	536	727	813	747	670	698	689	612	387	630
Basp1	197	152	159	209	232	182	147	158	132	151	97	118
Batf	20	10	26	16	39	32	12	8	34	33	27	43
Batf2	0	0	0	0	3	2	128	95	112	149	95	134
Batf3	37	42	33	46	33	49	46	57	40	53	56	91
Bax	4711	4128	4327	4709	5014	4679	4041	4229	3713	3945	3610	4854
Baz1a	3172	2366	2195	2726	3055	2474	2651	2494	2031	1859	1074	1889
Baz1b	6296	4846	4388	5485	6366	5243	5523	5111	4019	3761	2550	3897
Baz2a	2202	1575	1524	1695	1851	1586	1886	1584	1141	1088	602	1239
Baz2b	437	382	359	444	422	415	357	299	235	287	221	385
BB557941	1	0	4	2	4	0	1	0	3	3	4	6
Bbc3	148	151	166	197	234	165	106	109	134	103	137	192
Bbip1	290	280	334	311	380	325	391	382	405	427	491	685
Bbof1	14	9	8	10	10	13	9	21	3	12	14	2
Bbs1	105	106	78	92	104	68	77	114	68	78	45	72
Bbs10	68	49	29	51	61	61	53	44	76	85	55	57
Bbs12	104	62	57	53	72	70	59	70	50	79	54	68
Bbs2	148	110	140	162	139	131	141	128	128	164	128	134
Bbs4	337	243	217	306	293	241	312	317	290	281	330	388
Bbs5	73	73	64	67	79	77	62	76	81	98	91	101
Bbs7	368	300	279	373	368	318	351	362	318	335	317	333
Bbs9	223	168	158	208	214	169	176	188	168	168	108	132
Bbx	994	724	680	820	959	808	1022	962	860	836	473	753
BC002059	88	76	68	69	82	87	59	122	85	98	92	115
BC002163	1	0	0	5	1	1	0	1	0	0	1	3
BC003331	674	612	535	647	685	693	670	783	773	777	618	693
BC003965	376	293	319	349	418	358	361	361	394	390	412	593
BC004004	1655	1393	1306	1658	1761	1616	1631	1820	1552	1665	1575	1787
BC005537	2468	1873	1925	2305	2516	2243	2302	2196	1983	2015	1401	2011
BC005561	124	86	69	120	113	119	88	84	80	89	83	115
BC005624	840	757	732	858	875	840	869	885	726	689	651	800
BC017158	492	364	397	520	528	443	467	450	398	401	280	331
BC017643	711	582	497	661	788	708	832	1009	913	886	926	1123
BC022687	200	135	172	183	193	142	161	195	151	182	135	202
BC022960	7	3	9	7	8	4	7	7	5	1	8	6
BC024063	101	47	78	63	73	63	70	82	112	118	118	161
BC024978	229	195	169	223	246	230	189	183	181	130	92	162
BC025920	12	3	5	7	12	4	8	6	0	4	9	6
BC028528	2	3	1	0	0	3	0	1	1	4	8	2
BC029722	583	529	484	648	594	547	649	677	579	519	433	522
BC030336	694	585	521	589	679	624	756	609	589	601	479	608
BC030343	5	1	7	6	6	5	5	3	4	5	5	2
BC030867	734	605	600	752	851	625	603	595	463	467	300	478
BC031181	1167	956	887	1093	1096	999	1110	1133	881	1115	981	1428
BC034090	1	1	0	3	0	1	4	1	1	0	3	0
BC037032	4	10	1	11	7	10	9	20	12	18	9	18
BC037034	233	222	205	205	221	209	194	223	149	138	87	200
BC039771	1	2	6	1	2	1	2	0	5	2	1	1
BC043934	57	47	41	63	79	63	52	73	53	49	27	31
BC048403	236	248	230	256	308	256	264	237	241	186	137	210
BC048644	0	7	9	4	4	2	1	5	0	3	1	0
BC049715	65	69	54	61	81	46	58	67	52	47	43	39
BC049762	4	1	6	5	1	3	2	3	1	10	6	7
BC051019	4	5	1	4	1	6	2	1	0	0	3	3
BC051226	38	34	54	45	29	42	37	39	43	58	43	39
BC052040	439	313	368	370	454	404	385	408	324	288	235	335
BC055324	830	624	579	798	973	792	839	821	819	834	741	844
BC064078	3	3	0	4	4	1	9	6	7	0	2	4
BC065397	2	4	2	3	3	0	2	0	6	7	1	8
BC065403	2	7	0	0	0	2	4	3	0	2	1	0
BC067074	10	7	23	39	51	55	22	10	24	26	21	34
BC106179	9	5	2	9	10	0	3	5	7	10	6	10
Bcam	48	34	84	94	151	110	23	35	63	49	80	89
Bcan	175	124	103	90	123	105	126	165	55	69	45	51
Bcap29	1246	891	950	1041	1382	1160	1257	1251	1395	1449	1565	1725
Bcap31	2478	2449	2233	2765	2357	2463	2544	2663	2499	2532	2769	3663
Bcar1	1983	1621	1834	2291	2536	2188	1360	1402	1239	1185	823	1389
Bcar3	79	72	31	44	31	44	43	43	12	11	17	17
Bcas1	3	3	0	4	2	0	5	4	1	5	1	8
Bcas2	2158	2026	1968	2357	2321	2229	2306	2459	2530	2627	2802	3464
Bcas3	875	702	642	753	753	731	663	692	542	531	423	503
Bcat1	2574	2065	2159	2890	3381	2921	2408	2411	2188	2270	1820	2328
Bcat2	1473	1295	1266	1553	1475	1460	1311	1524	1210	1254	1169	1433
Bccip	1707	1406	1510	1990	2099	1858	1695	2021	1922	1966	1866	2220
Bcdin3d	222	204	209	262	266	247	216	225	279	269	258	300
Bche	4	2	5	4	5	3	4	3	15	16	3	2
Bckdha	392	346	367	436	503	433	330	388	306	332	267	362
Bckdhb	257	299	236	277	321	293	263	264	262	298	238	303
Bckdk	1934	1528	1481	1839	2171	2008	1772	1862	1694	1795	1525	1828
Bcl10	553	477	550	555	786	639	553	598	599	627	686	904
Bcl11a	39	30	20	14	35	22	22	28	13	16	14	17
Bcl2	675	490	437	501	656	574	474	485	414	394	298	485
Bcl2l1	1111	869	800	1159	1245	1032	911	896	778	803	591	826
Bcl2l11	124	111	73	93	87	95	83	120	70	57	60	108
Bcl2l12	185	149	159	160	160	172	157	143	138	159	150	167
Bcl2l13	3309	2632	2801	3598	3966	3480	3114	3201	3038	3153	2399	3117
Bcl2l2	391	320	298	347	363	357	368	352	241	210	196	327
Bcl3	2	9	17	52	56	49	9	12	33	9	32	39
Bcl6	55	45	51	65	93	52	72	98	54	48	32	68
Bcl7a	826	681	509	685	788	597	657	637	533	536	368	455
Bcl7b	724	642	683	755	827	702	694	689	587	634	516	686
Bcl7c	1101	962	1122	1335	1380	1254	1011	1030	1027	1077	917	1123
Bcl9	730	544	480	543	680	492	584	524	445	439	295	481
Bcl9l	2139	1784	1542	1905	2112	1863	1661	1474	1086	1100	772	1301
Bclaf1	5618	4424	4312	5247	5706	4920	4899	4851	4013	3965	2831	3884
Bclaf3	226	176	177	224	231	237	186	182	224	160	164	231
Bco2	15	6	14	8	14	6	16	22	24	18	15	30
Bcor	1696	1241	1120	1342	1589	1309	1286	1120	806	815	603	808
Bcorl1	422	285	315	372	455	379	323	271	200	224	193	315
Bcr	1661	1293	1248	1565	1935	1486	1270	1191	995	1005	656	1060
Bcs1l	239	203	240	271	360	306	242	322	265	269	286	266
Bdh1	1958	1603	1722	2428	2529	2243	1964	2081	1960	1936	1636	2019
Bdh2	275	243	226	227	319	276	298	323	308	303	342	362
Bdnf	36	24	34	31	28	39	14	10	24	41	20	44
Bdp1	1290	857	840	1009	1146	1000	1099	1016	772	873	456	721
Becn1	2785	2338	2388	2556	3031	2662	2457	2752	2351	2271	2017	2388
Begain	11	4	5	5	16	6	6	6	5	9	4	3
Bend3	937	644	695	769	941	776	695	615	535	482	328	559
Bend4	704	511	378	544	774	468	478	473	354	384	236	384
Bend6	786	633	594	730	856	779	703	850	655	674	728	852
Bend7	4	5	0	0	1	0	4	1	3	5	1	2
Bet1	1005	816	890	1009	1128	1148	986	1073	1194	1366	1284	1769
Bet1l	170	171	178	202	212	197	228	190	248	304	252	370
Bex3	954	1003	1035	1235	1057	1079	1017	1051	1022	1023	1056	1256
Bfar	909	638	674	866	931	811	777	867	886	1029	973	1153
Bfsp2	1359	1070	946	1152	1156	1067	1358	1430	1080	1031	1135	1240
Bglap2	6	2	6	0	6	8	6	5	3	4	2	8
Bhlhb9	614	434	471	478	663	555	527	533	498	481	350	479
Bhlhe40	1612	1271	1326	1497	1768	1486	1519	1478	1247	1322	917	1318
Bhlhe41	4887	4253	4226	5677	6065	4733	5319	5061	4788	4727	3039	4627
Bicd1	617	486	483	549	695	602	537	583	666	660	554	634
Bicd2	2594	1982	1864	2349	2528	2089	2245	2200	1711	1751	1086	1633
Bicdl1	7	15	7	12	19	12	10	12	10	16	10	9
Bicra	356	272	260	259	345	292	209	190	145	155	99	218
Bicral	426	334	249	331	449	383	314	302	194	254	146	293
Bid	361	296	344	414	522	523	651	684	715	785	769	955
Bin1	940	869	850	974	1067	1038	872	924	689	641	539	666
Bin2	0	0	1	2	2	6	1	0	0	1	1	1
Bin3	1201	999	1081	1312	1407	1328	1232	1402	1360	1433	1469	1782
Birc2	240	195	205	243	315	326	222	270	366	354	443	411
Birc3	23	49	69	83	108	98	31	30	70	68	61	80
Birc5	2811	2748	2618	3138	3149	3167	2891	3229	2931	2993	2931	3855
Birc6	4438	2808	2563	2884	4112	2954	3255	2404	1961	1849	1227	2284
Bivm	767	534	609	782	835	778	709	839	882	950	835	1075
Blcap	551	453	416	578	667	595	538	561	459	533	394	612
Blm	1176	904	848	1060	1298	1090	1035	1123	949	985	669	875
Blmh	2689	2098	2096	2808	3108	2823	2634	2834	2650	2606	2608	2816
Bloc1s1	348	446	385	482	334	369	381	503	390	473	495	678
Bloc1s2	1394	1476	1330	1788	1736	1568	1425	1666	1577	1750	1832	2365
Bloc1s2-ps	2	1	3	4	2	0	2	1	5	5	4	8
Bloc1s3	280	182	201	271	301	245	197	219	216	242	188	244
Bloc1s4	464	406	371	460	513	473	411	422	442	484	363	484
Bloc1s5	704	501	466	709	790	637	686	727	740	758	813	865
Bloc1s6	470	357	374	455	522	438	434	503	477	478	408	609
Blvra	716	729	630	803	873	812	841	881	894	1098	1097	1392
Blvrb	601	564	635	783	754	626	642	725	715	755	694	1053
Blzf1	927	717	719	877	897	927	859	894	777	795	797	879
Bmf	33	34	42	30	44	19	41	37	26	36	28	26
Bmi1	4234	3297	2997	3555	4181	3946	3701	3916	3665	3840	3549	4076
Bmp1	343	246	244	330	449	336	217	233	158	156	160	247
Bmp2k	524	398	412	537	791	648	461	564	539	478	468	512
Bmp8a	2	0	0	5	1	2	0	0	5	2	1	3
Bmpr1a	1390	966	990	1113	1389	1294	1299	1401	1255	1351	1161	1336
Bmpr1b	4	2	1	3	5	2	5	12	5	1	0	3
Bmpr2	2748	1628	1409	1820	2271	1776	1932	1670	1301	1453	993	1521
Bms1	5193	4037	4484	5512	6410	5216	4665	4399	3875	3344	2427	3496
Bmt2	885	635	750	738	969	846	831	841	925	1001	756	930
Bmyc	335	303	407	505	446	436	347	310	464	432	322	483
Bnc2	658	496	538	680	638	575	613	616	495	524	345	513
Bnip1	347	303	340	428	397	366	377	462	442	429	523	598
Bnip2	3520	2811	2773	3727	3985	3467	3441	3843	3635	3633	3350	3644
Bnip3	331	218	205	259	298	322	323	370	359	437	520	594
Bnip3l	1101	906	784	1081	1189	1082	947	1253	1226	1231	1402	1572
Bnip3l-ps	5	0	1	0	2	1	3	6	5	5	0	3
Boc	783	674	586	751	814	787	571	696	462	484	426	534
Bod1	1493	1355	1500	1953	1909	1856	1605	1731	1883	1964	1972	2407
Bod1l	1438	1035	877	1039	1272	1010	1130	848	706	877	437	791
Bok	7	9	11	12	15	23	8	19	12	15	16	3
Bola1	322	261	289	339	321	325	260	299	310	419	405	593
Bola2	1491	1473	1688	1785	1496	1718	1439	1672	1631	1787	1927	3074
Bola3	1199	1268	1525	1813	1618	1752	1329	1451	1631	1940	2062	2832
Bop1	5443	4795	4862	6157	6432	5758	5496	5850	5270	5118	4317	5330
Bora	490	353	374	436	468	406	368	358	350	301	294	396
Borcs5	274	194	201	278	268	261	227	218	248	241	193	182
Borcs6	361	368	344	476	538	404	355	410	401	382	299	387
Borcs7	116	79	105	113	155	132	108	106	124	105	132	144
Borcs8	261	235	240	250	298	285	287	266	214	243	151	273
Bpgm	909	871	840	966	952	974	1019	839	989	914	1032	1157
Bphl	327	272	221	261	237	195	266	289	287	266	229	323
Bpnt1	4040	3355	3344	3761	3667	3553	4296	4486	3732	3603	2770	4040
Bptf	3905	2762	2587	2997	3531	2944	2614	2244	1641	1569	987	1882
Braf	1065	841	811	978	1277	909	922	809	781	758	456	819
Brap	1525	1228	1157	1549	1699	1435	1450	1443	1294	1234	865	1222
Brat1	464	365	323	397	435	353	337	367	255	237	170	253
Brca1	2803	2224	2342	3107	2989	2597	2951	3026	3341	3466	2629	3454
Brca2	900	622	630	737	896	687	729	672	555	567	320	521
Brcc3	1057	778	810	933	1053	970	1099	1163	1289	1333	1227	1477
Brd1	2121	1684	1570	1788	1916	1745	1595	1596	1110	1026	763	1185
Brd2	7744	6295	6527	7451	7834	6922	6273	6287	5329	4888	3629	5449
Brd3	2338	1814	1620	2269	2425	2021	1908	1771	1350	1397	868	1363
Brd3os	91	98	77	127	96	138	102	71	88	114	116	126
Brd4	6463	5024	4749	5811	6523	5303	4985	4578	3512	3546	2629	4142
Brd7	1905	1591	1569	1909	1964	1666	1791	1756	1600	1430	1027	1334
Brd8	1214	1067	1005	1179	1080	1037	896	1009	744	757	619	869
Brd9	1030	690	747	905	812	769	876	881	767	647	444	747
Brdt	15	13	12	15	13	25	25	26	22	15	27	25
Brf1	936	822	801	990	1037	901	947	976	863	772	582	716
Brf2	334	321	304	328	423	370	340	338	297	335	295	335
Bri3	1255	1002	933	1085	1646	1226	1134	1405	1280	1425	1392	1679
Bri3bp	1853	1653	1439	1883	2028	1844	1709	1769	1624	1500	1351	1833
Bricd5	4	4	2	2	0	2	1	0	0	1	0	0
Brip1	1156	887	940	987	1248	1124	1322	1367	1176	1167	744	984
Brip1os	2780	2159	1905	2561	2714	2398	2829	2984	2427	2451	2372	2780
Brix1	1843	1678	1593	1924	1864	1728	1854	2137	1989	2079	2077	2756
Brk1	3342	2942	3160	3934	3630	3609	3144	3479	3654	3997	3791	5372
Brms1	863	816	816	1080	1008	939	847	892	869	858	880	1116
Brms1l	587	512	432	671	634	582	594	603	580	586	498	608
Brox	1338	1066	1080	1203	1437	1295	1188	1307	1173	1263	1124	1336
Brpf1	1747	1495	1407	1719	1848	1590	1519	1410	1275	1161	851	1234
Brpf3	1624	1227	1053	1314	1544	1289	1127	1162	942	908	619	957
Brs3	444	310	303	379	545	371	452	443	474	489	486	554
Brsk1	6	9	10	9	18	16	6	7	7	7	3	22
Brwd1	1270	945	888	1040	1338	998	1074	968	862	847	667	950
Brwd3	1808	1166	996	1211	1594	1271	1450	1322	1054	1020	580	995
Bscl2	267	220	171	214	216	200	250	215	192	207	85	152
Bsdc1	363	307	322	366	360	331	308	266	247	214	134	272
Bsg	11606	9180	8832	10645	11975	11095	10568	11794	10483	10810	10213	12922
Bsn	155	135	105	124	108	120	76	79	72	61	47	83
Bst2	669	605	698	695	833	840	6309	6630	6143	5940	5641	7767
Btaf1	1666	1133	1086	1453	1650	1504	1354	1237	1053	1115	731	1133
Btbd1	1575	1345	1286	1487	1810	1471	1329	1513	1349	1314	1178	1312
Btbd10	963	788	824	993	1019	832	942	979	905	927	755	866
Btbd16	0	0	1	3	0	1	6	1	0	0	2	1
Btbd18	8	2	8	6	0	2	6	1	2	6	5	4
Btbd19	350	259	229	335	369	299	258	204	213	243	149	304
Btbd2	583	508	522	625	647	563	512	542	492	508	315	377
Btbd3	1219	1072	936	1339	1542	1286	1266	1290	1390	1428	1165	1352
Btbd6	331	285	258	381	373	343	266	260	265	233	196	233
Btbd7	1594	1281	1091	1330	1680	1356	1223	1237	1108	1066	752	1035
Btbd9	975	709	712	865	1044	899	943	903	700	716	508	723
Btd	417	356	403	418	468	459	454	455	389	385	394	425
Btf3	11525	10879	10372	12424	11583	11671	13380	14984	13841	15194	16499	22101
Btf3l4	1710	1508	1425	1619	1802	1640	1717	1980	1749	1824	1971	2539
Btg1	211	188	193	246	296	268	216	196	239	256	193	218
Btg2	113	104	73	94	89	103	54	60	31	33	51	32
Btg3	1085	967	942	1164	1240	1089	1208	1256	1412	1535	1700	2088
Btla	3	4	5	1	10	1	3	14	12	5	3	5
Btn2a2	13	12	101	148	100	79	12	16	109	99	53	77
Btrc	641	552	511	671	695	618	650	627	507	447	367	510
Bub1	2413	1885	1777	2025	2480	2248	2241	2428	2265	2266	2030	2210
Bub1b	3545	2868	2931	3667	3947	3400	3107	3162	2636	2283	1548	2326
Bub3	5116	4335	4254	5026	5085	4582	4333	4633	4015	4137	3692	4703
Bud13	609	570	564	629	644	615	593	570	394	487	410	458
Bud23	1474	1111	1231	1463	1750	1604	1414	1621	1389	1455	1506	1800
Bud31	2203	1870	1786	2053	2127	2317	2231	2632	2437	2766	3382	4618
Bvht	150	139	98	102	138	165	136	161	85	113	139	204
Bysl	2359	2021	1957	2312	2796	2434	2076	2215	1922	1897	1578	1992
Bzw1	15328	11540	11431	14002	17428	14979	14935	16191	16152	17507	17173	19377
Bzw2	2458	2015	2049	2524	2598	2431	2368	2559	2237	2187	2219	2684
C030006K11Rik	359	325	311	312	358	336	309	323	239	231	154	248
C030014I23Rik	11	10	2	19	25	1	13	27	5	2	5	11
C030015A19Rik	82	47	51	70	78	74	74	49	65	31	31	38
C030029H02Rik	28	5	4	18	15	15	16	12	11	15	12	15
C030034I22Rik	16	18	19	20	14	16	8	37	14	11	19	32
C030037D09Rik	54	52	56	56	51	39	30	39	34	35	32	54
C130013H08Rik	62	36	35	28	42	43	60	63	26	31	9	34
C130021I20Rik	109	68	74	87	89	88	78	78	71	79	65	71
C130032M10Rik	8	0	3	0	2	1	5	4	1	4	1	0
C130036L24Rik	38	23	34	35	45	44	47	32	28	45	45	47
C130046K22Rik	22	37	23	16	25	19	28	19	25	14	13	16
C130050O18Rik	0	11	3	5	8	3	0	1	3	1	0	4
C130051F05Rik	3	1	2	0	0	0	0	1	0	1	2	2
C130060C02Rik	2	1	5	0	4	2	5	15	1	15	6	2
C130071C03Rik	69	71	71	57	59	64	62	76	75	68	93	119
C130083M11Rik	25	13	25	17	37	24	21	29	17	4	6	20
C1d	831	625	697	802	856	868	956	1019	1049	1280	1502	2074
C1galt1	2412	1786	1633	1977	2772	2153	2291	2363	2431	2506	2005	2317
C1galt1c1	145	120	158	151	133	194	126	184	195	175	200	204
C1qbp	4447	3811	4048	4670	4855	4726	4409	4730	4203	4127	3889	5235
C1ql1	42	19	21	15	14	9	18	25	10	9	17	12
C1ql3	132	110	128	179	291	209	121	162	148	167	179	254
C1qtnf1	3	4	15	10	10	10	2	3	5	4	2	2
C1qtnf12	0	4	2	1	1	3	1	1	1	0	0	1
C1qtnf5	35	37	47	57	50	26	30	38	32	26	40	44
C1qtnf6	2717	2126	2121	2509	3019	2603	2044	2109	1664	1640	1330	1794
C1ra	89	56	112	121	125	91	207	239	354	347	268	354
C1rl	153	117	153	166	194	183	157	158	179	172	195	172
C1s1	19	1	24	22	31	28	12	9	30	32	30	27
C2	1031	758	756	897	827	837	1489	1426	1431	1403	1052	1348
C230035I16Rik	6	1	2	5	2	5	6	4	1	4	12	6
C230037L18Rik	2	4	4	0	6	2	2	0	3	4	2	1
C230038L03Rik	1	3	7	0	2	1	3	0	2	0	0	1
C230062I16Rik	27	26	27	8	26	28	23	29	18	19	9	23
C230096K16Rik	2	5	3	3	8	1	3	3	0	1	1	5
C2cd2	228	133	157	196	275	198	195	183	142	178	122	149
C2cd2l	2484	1961	1695	2058	2338	1963	2044	2048	1424	1378	1040	1461
C2cd3	1054	745	684	817	966	797	778	686	582	524	344	602
C2cd4d	5	18	7	5	14	0	3	9	5	8	3	6
C2cd5	960	681	942	999	1161	1037	741	834	848	934	706	861
C330007P06Rik	1006	828	749	845	1056	931	950	1043	1034	973	951	1164
C330011M18Rik	5	8	4	1	2	4	7	3	1	5	4	5
C330013E15Rik	3	4	4	9	6	12	5	6	5	4	3	10
C330018A13Rik	89	102	90	112	81	104	108	121	95	89	107	129
C330018D20Rik	135	112	117	102	150	113	144	152	160	195	212	305
C330027C09Rik	3555	2746	2738	3301	3856	3669	3205	3692	3778	3936	3778	4146
C430014B12Rik	8	16	5	14	5	6	9	7	7	3	0	9
C430042M11Rik	10	9	12	9	23	21	22	20	14	18	14	23
C430049B03Rik	12	15	10	16	21	14	11	16	5	15	23	19
C430049E01Rik	6	0	2	3	1	3	5	3	5	3	3	4
C4a	2	7	6	8	2	4	6	4	4	4	3	12
C4b	2	0	3	10	0	0	76	70	74	44	40	64
C530005A16Rik	0	1	1	3	4	1	0	3	2	2	1	0
C530008M17Rik	1114	909	694	891	963	798	696	596	377	370	192	467
C530044C16Rik	9	1	6	2	5	5	16	9	3	1	3	2
C630004M23Rik	21	16	25	22	9	15	24	11	3	19	6	10
C630043F03Rik	13	11	14	12	14	0	11	21	23	14	17	10
C730034F03Rik	5	3	17	4	15	16	21	11	3	15	9	7
C77080	1031	814	2106	2525	3087	2622	790	796	1593	1645	1265	1871
C78283	0	2	4	1	0	2	1	2	0	0	1	0
C78859	1	0	2	1	4	6	2	0	0	0	2	0
C79130	18	8	24	13	14	6	10	12	4	8	4	21
C87436	323	281	280	336	384	354	303	328	255	258	230	342
C8g	15	23	9	31	19	21	27	22	11	22	32	17
C920006O11Rik	1	7	3	4	10	5	13	6	5	7	10	3
C920009B18Rik	224	176	167	201	296	217	193	214	155	183	155	230
C920021L13Rik	4	9	8	9	4	4	1	1	2	7	1	6
Caap1	298	307	261	323	342	392	322	388	306	388	303	424
Cab39	2856	2022	2081	2329	2847	2452	2411	2276	2006	1766	1495	1997
Cab39l	781	631	542	691	796	712	765	877	768	852	805	857
Cabin1	1388	1109	1104	1285	1564	1284	1223	1145	833	945	654	994
Cables1	27	27	9	12	27	6	13	13	9	6	2	3
Cables2	224	161	184	208	212	235	205	183	132	149	85	169
Cabp1	20	27	22	20	16	17	12	23	12	16	17	19
Cabp7	9	1	11	9	21	5	5	5	9	2	7	18
Cabyr	8	1	0	6	3	8	0	1	8	5	6	7
Cacfd1	647	497	382	562	584	514	476	504	380	368	340	408
Cachd1	120	108	108	111	150	112	87	66	57	44	61	67
Cacna1a	46	45	41	32	61	42	24	43	31	31	19	37
Cacna1c	276	203	215	219	237	217	198	161	141	155	83	139
Cacnb1	19	11	4	20	16	12	13	11	1	12	2	6
Cacnb3	203	148	165	200	237	208	201	185	130	139	119	121
Cacnb4	55	33	30	22	32	37	42	49	39	40	28	51
Cacng7	86	93	86	103	138	108	52	52	42	24	34	60
Cacng8	13	14	10	8	9	9	11	12	12	17	14	11
Cactin	1600	1583	1346	1702	1796	1415	1290	1278	1094	997	697	1065
Cacul1	3106	2353	2474	2893	3693	3099	2979	2964	2533	2736	2261	2836
Cacybp	4847	3993	3886	4688	5410	4981	5323	6044	6232	6619	6271	8151
Cad	9324	6865	6671	8247	9578	7676	6500	5238	4036	4323	2733	5302
Cadm1	4105	3471	3011	3734	4237	3933	5564	5569	4802	4520	3721	5452
Cadm2	8	1	1	0	4	7	0	9	1	0	5	0
Cadm4	1500	1305	1352	1693	2061	1854	1215	1178	957	860	762	1082
Cage1	15	4	10	22	6	5	9	12	9	5	3	6
Calcoco1	440	426	393	481	549	430	466	383	272	295	228	345
Calcrl	90	55	49	67	95	56	82	82	101	79	90	108
Cald1	3703	3053	3241	3858	5179	4778	2905	2849	2752	2751	2810	3268
Calhm2	179	161	152	191	215	213	163	170	111	122	98	139
Calm1	19213	15087	14944	19209	22069	18943	18259	21116	19671	20932	19239	22908
Calm2	9475	8585	8324	9413	9048	9313	9465	10115	9410	10060	9789	13303
[truncated: 13,077 more rows]

## Sheet: RNAseq_normalized
	sgCtrl_veh_1	sgCtrl_veh_2	sgTraf3_1_veh_1	sgTraf3_1_veh_2	sgTraf3_2_veh_1	sgTraf3_2_veh_2	sgCtrl_IFNg_1	sgCtrl_IFNg_2	sgTraf3_1_IFNg_1	sgTraf3_1_IFNg_2	sgTraf3_2_IFNg_1	sgTraf3_2_IFNg_2
0610009O20Rik	9.92333	9.90249	9.94328	9.78217	9.85553	9.78232	9.86919	9.75481	9.64237	9.49256	9.67785	9.67875
0610010F05Rik	9.49806	9.32143	9.3156	9.4423	9.38955	9.52946	9.43571	9.36921	9.44656	9.67882	9.77964	9.54466
0610010K14Rik	9.0135	9.21454	9.40366	9.49242	9.36275	9.34823	9.34416	9.11313	9.44656	9.64461	9.63361	9.86056
0610012G03Rik	9.35335	9.32633	9.46407	9.39624	9.53741	9.54765	9.30275	9.49141	9.32342	9.56349	9.84438	9.63543
0610030E20Rik	8.98637	9.06424	9.15562	8.91393	9.17212	9.26704	9.05733	9.02436	9.20432	9.21506	9.25117	9.34613
0610037L13Rik	8.59659	8.55068	8.64998	8.49837	8.6121	8.77948	8.72496	8.88714	8.6562	8.77506	8.92702	8.92143
1110004E09Rik	9.60384	9.76698	9.82438	9.78366	9.72711	9.78232	10.0352	9.9154	10.1631	10.1785	10.441	10.4439
1110004F10Rik	12.0126	12.1327	12.19	12.2462	12.1496	12.1997	12.2348	12.3527	12.4624	12.6749	12.8867	12.9033
1110008F13Rik	11.3178	11.4381	11.3479	11.4193	11.4627	11.4671	11.4498	11.5594	11.6392	11.7644	12.1863	12.0516
1110008L16Rik	8.41906	8.45498	8.61334	8.56619	8.60599	8.48529	8.75121	8.72568	8.69736	8.36944	8.63611	8.57894
1110008P14Rik	8.48428	8.80076	8.65799	8.57315	8.28436	8.53753	8.78971	8.69306	8.5416	8.72477	8.83511	9.12875
1110012L19Rik	7.84002	7.81702	7.91258	7.91875	7.93257	8.12832	7.85031	7.93421	8.06678	8.21582	8.70558	8.67169
1110032A03Rik	6.98565	7.12998	7.26572	6.94308	7.01654	6.7799	7.01689	7.31637	6.96888	6.89627	7.20449	7.23898
1110034G24Rik	6.75168	7.00571	6.5692	6.96586	6.95636	6.71025	6.88334	6.99487	6.88789	7.18294	7.49221	7.5124
1110038F14Rik	9.0305	9.11894	9.0503	9.25278	8.94253	9.0362	9.29832	9.63513	9.70761	9.70857	9.96949	9.95016
1110051M20Rik	8.92012	8.85613	8.91674	8.7306	8.73469	8.92621	8.83641	8.91566	8.90628	9.02974	9.12882	9.13135
1110059E24Rik	8.76606	8.59213	8.81308	8.92752	8.94736	8.88662	9.15128	9.16625	9.44874	9.61152	9.98994	10.0331
1110059G10Rik	7.67969	7.77378	7.61889	7.90766	7.50119	7.88862	7.85031	8.05333	8.06678	7.95787	8.60735	8.43375
1110065P20Rik	9.21379	9.30416	9.33315	9.37066	9.30198	9.26704	9.31595	9.49895	9.45744	9.56145	9.74504	9.93089
1190005I06Rik	7.66066	7.93916	7.96581	7.9782	7.45298	7.62698	7.65177	7.7207	7.51487	7.74019	7.66413	7.71138
1190007I07Rik	7.90035	7.8658	7.7773	7.91875	7.81406	7.56219	7.72118	7.93421	8.33839	8.34577	8.51222	8.44643
1500009L16Rik	6.29788	6.31935	6.33379	5.76604	5.94986	6.06377	6.39877	6.34318	6.0018	5.78053	6.02711	6.01294
1600002K03Rik	7.93219	8.26246	8.20523	7.90766	7.89249	7.85925	8.02933	8.27381	8.20392	8.17868	8.66431	8.9601
1600012H06Rik	8.79767	8.52949	8.81666	8.66385	8.76786	8.83108	8.79287	8.98186	9.11078	9.03857	9.3116	9.20245
1600014C10Rik	8.34678	8.33776	8.38574	8.67358	8.51432	8.44286	8.53005	8.41309	8.59412	8.30213	8.37646	8.50417
1700003E16Rik	5.85645	5.69093	6.09014	6.0757	6.02708	6.11589	6.05118	5.88668	5.89773	6.00652	6.2344	5.94911
1700003F12Rik	8.43381	8.56324	8.54146	8.5309	8.37728	8.37055	8.8241	8.67311	9.12998	9.28592	9.76892	9.73967
1700007K13Rik	6.25815	6.41013	6.38064	6.23993	6.37119	6.25657	6.51011	6.2594	6.12295	6.09935	6.10161	6.18007
1700008O03Rik	5.75169	5.05844	5.32153	5.46969	5.05844	5.47576	5.70274	5.30054	5.73133	5.05844	5.05844	5.30909
1700010I14Rik	6.89734	6.8383	6.50989	6.80965	6.30054	6.60521	6.8039	6.91227	6.75539	6.96436	6.77898	7.00674
1700017B05Rik	10.1273	9.98828	10.1152	9.83774	10.0537	9.98668	9.90017	9.86965	9.57803	9.60758	9.37243	9.70168
1700019D03Rik	8.56683	8.51662	8.34148	8.39605	8.45769	8.38286	8.94263	9.09332	9.29699	9.39525	9.44972	9.1209
1700021F05Rik	9.01594	9.22507	9.04116	9.21345	9.08509	9.16219	9.30496	9.2424	9.45744	9.38376	9.78603	9.69466
1700025G04Rik	8.87509	8.84248	8.53711	8.63757	8.63628	8.804	8.64667	8.84623	8.51249	8.48655	8.44868	8.45064
1700029I15Rik	5.46124	5.50745	5.58246	5.68385	5.6937	5.47576	5.5472	5.40042	5.31474	5.05844	5.69046	5.4915
1700030J22Rik	5.91862	5.98111	6.05865	5.58818	5.73157	5.6466	5.74643	5.8523	5.9686	5.86371	5.85417	5.84239
1700030K09Rik	8.40039	8.26761	8.02962	8.29843	8.28436	8.49665	8.22616	8.47214	8.60203	8.35529	8.34767	8.38625
1700037C18Rik	6.76452	6.67873	6.53001	6.28208	6.54416	6.36004	6.39877	6.87512	6.91548	6.82419	7.04803	6.93179
1700037H04Rik	9.443	9.69884	9.4799	9.45546	9.39309	9.57806	9.32251	9.29967	9.15162	9.15951	9.20411	9.14431
1700066B19Rik	5.75169	5.42554	5.58246	5.05844	5.6937	5.85036	5.65564	5.30054	5.42043	5.57167	5.80393	5.91518
1700066M21Rik	8.95108	8.95132	8.91674	8.82375	9.1154	9.10674	8.93121	9.1351	9.44874	9.44473	9.87269	9.72252
1700067K01Rik	5.62626	5.31837	5.42999	5.53278	5.05844	5.59597	5.40487	5.05844	5.42043	5.4223	5.80393	5.41247
1700088E04Rik	5.97614	6.24551	6.14997	6.36139	5.76728	5.94891	5.82586	6.06619	5.93397	6.54026	6.32319	6.36486
1700092M07Rik	5.05844	5.31837	5.51288	5.29641	5.05844	5.69301	5.05844	5.30054	5.31474	5.05844	5.34289	5.55788
1700102P08Rik	5.05844	5.42554	5.64353	5.53278	5.50944	5.47576	5.30369	5.64805	5.6822	5.57167	5.46007	5.61614
1700123O20Rik	8.8118	9.02256	9.09513	9.18209	8.99941	9.14075	9.05207	9.26248	9.25515	9.27352	9.74504	9.86213
1810009A15Rik	9.49806	9.52675	9.73678	9.64786	9.49693	9.74341	9.61547	9.87979	10.1376	10.1326	10.7464	10.8126
1810010H24Rik	5.85645	6.13741	5.74887	5.87287	5.76728	5.94891	5.82586	5.64805	5.56905	5.57167	5.85417	5.30909
1810013L24Rik	9.92074	9.91715	9.88506	10.0667	10.0813	10.0351	10.0339	9.98676	10.0825	10.2152	10.0966	10.0742
1810022K09Rik	9.23278	9.59727	9.36519	9.35268	9.27348	9.44656	9.60117	9.53789	9.65566	9.96876	10.3083	10.48
1810030O07Rik	9.30832	9.41403	9.27724	9.51773	9.38778	9.37905	9.41949	9.41776	9.58201	9.46231	9.42806	9.43309
1810037I17Rik	9.97803	10.2716	10.4309	10.378	10.2831	10.4146	10.3661	10.4576	10.7775	11.0311	11.2969	11.61
1810043G02Rik	9.49282	9.49885	9.38455	9.47959	9.41759	9.35857	9.78159	9.73102	9.68372	9.57766	9.63597	9.68052
1810055G02Rik	8.80334	8.84248	8.60092	8.75828	8.81622	8.73873	8.82719	8.88426	8.77977	8.68398	8.66431	8.75876
1810058I24Rik	10.3643	10.4963	10.7043	10.4935	10.4776	10.4842	10.3448	10.368	10.3414	10.2722	10.3804	10.3885
2010107E04Rik	10.8362	11.212	11.3086	10.9942	10.6512	11.029	11.0448	11.231	11.1545	11.3216	11.6716	12.1134
2010111I01Rik	7.28797	7.48106	7.20989	7.42592	7.13789	7.2572	7.57109	7.58922	7.40745	7.75485	8.06523	8.0168
2010300C02Rik	5.52305	5.63658	5.42999	5.53278	5.56216	5.53977	5.5472	5.77812	5.62858	5.78053	5.54955	5.4915
2210016F16Rik	10.2356	10.246	10.0918	10.129	10.0998	10.0883	10.23	10.3284	10.4291	10.3638	10.2844	10.1934
2210016L21Rik	9.42844	9.53945	9.56932	9.31603	9.46706	9.53677	9.66443	9.65044	9.63281	9.67694	9.99178	9.95163
2210408I21Rik	7.74127	7.56035	7.50509	7.51776	7.68441	7.82316	7.83793	7.93985	8.04354	8.06098	8.04374	8.01108
2300009A05Rik	7.71697	7.75164	7.84303	7.63124	7.5672	7.64097	7.4023	7.25253	7.38868	7.76935	7.6736	7.63825
2310009A05Rik	6.97495	7.04428	7.10294	6.89622	6.97674	6.99065	7.1789	7.24315	6.94246	7.02893	7.20449	7.21857
2310009B15Rik	7.99375	8.51662	8.50633	8.48367	8.22552	8.24115	8.25875	8.25145	8.24512	8.55408	8.50703	8.90323
2310011J03Rik	10.388	10.6298	10.681	10.6729	10.567	10.614	10.6085	10.6825	10.7904	10.8555	11.0871	11.1654
2310022A10Rik	9.26184	9.37912	9.42018	9.41946	9.28875	9.24935	9.21615	9.14476	9.2172	9.02678	8.89967	9.13135
2310022B05Rik	10.709	10.7123	10.5448	10.5259	10.5505	10.4973	10.3902	10.2324	10.1907	10.1785	9.80084	10.1454
2310030G06Rik	6.49259	6.43165	6.33379	6.39887	5.8939	6.0365	6.77622	6.32288	6.70776	6.55904	6.72119	6.75183
2310033P09Rik	8.81461	8.88635	8.92007	9.02679	8.77604	8.83703	9.01471	8.90147	8.87406	8.71007	8.84744	8.81831
2310034G01Rik	5.46124	5.87076	5.51288	5.3946	5.37799	5.81435	5.60425	5.64805	5.05844	5.57167	5.69046	5.71672
2310035C23Rik	9.94776	9.82687	9.80298	9.73365	9.83231	9.89453	9.91179	9.87545	9.7329	9.7467	9.4737	9.64091
2310039H08Rik	8.18133	8.33776	8.2539	8.3276	8.25721	8.20454	8.35221	8.21029	8.40338	8.19472	8.4808	8.35517
2310057J18Rik	6.29788	6.04706	5.79556	5.76604	5.8939	5.73606	6.15697	6.19154	5.8195	6.03859	6.43069	6.12775
2310057M21Rik	9.30633	9.52249	9.56508	9.60634	9.37353	9.52212	9.58491	9.40778	9.39992	9.3745	9.18161	9.4054
2310061I04Rik	9.26389	9.40017	9.55657	9.37264	9.16178	9.32308	9.06779	9.10574	8.97775	9.05026	8.85966	9.01761
2410004B18Rik	8.8258	9.13579	9.01961	8.98062	9.04739	9.15745	9.20436	9.25136	9.33763	9.51379	9.91609	9.86369
2410004P03Rik	5.62626	5.69093	5.32153	5.53278	5.28462	5.47576	5.05844	5.05844	5.05844	5.4223	5.34289	5.71672
2410015M20Rik	9.98301	10.3965	10.4733	10.3104	10.0402	10.311	10.3189	10.4382	10.5334	10.6773	11.2165	11.4512
2410089E03Rik	9.842	9.45929	9.45035	9.46851	9.69456	9.46582	9.51607	9.25136	9.23503	9.23054	9.00972	9.24637
2410131K14Rik	9.52225	9.25364	9.20552	9.34259	9.41933	9.41518	9.41336	9.21288	9.09691	9.28592	9.09136	9.27491
2510009E07Rik	8.92012	8.71345	8.55441	8.68645	8.80028	8.75769	9.0547	8.89575	8.66377	8.66123	8.58784	8.52821
2510039O18Rik	10.9938	10.9366	10.9791	10.9942	11.0186	10.9161	10.878	10.8337	10.5709	10.562	10.4055	10.6813
2610001J05Rik	9.81569	9.82687	10.0364	10.022	9.86573	10.0065	10.0151	9.9961	10.1776	10.2434	10.5651	10.6262
2610301B20Rik	8.61286	8.5674	8.44267	8.28574	8.39515	8.53753	8.68124	8.62547	8.53334	8.58668	8.98764	8.76886
2610507B11Rik	12.9653	12.8106	12.7244	12.802	12.9493	12.7879	13.0625	12.9844	12.8017	12.7415	12.4739	12.6307
2700049A03Rik	9.35527	9.23292	9.22983	9.12669	9.10033	9.13834	9.23945	9.10574	8.99881	8.72111	8.65497	8.86611
2700062C07Rik	7.75326	7.83113	7.67644	7.93522	7.7309	7.84132	7.85646	7.88823	7.80092	7.91309	8.2514	8.14236
2700081O15Rik	9.7645	9.80602	9.65349	9.91183	9.86319	9.80819	9.66099	9.51762	9.48961	9.45354	9.54837	9.49704
2810004N23Rik	10.426	10.4218	10.5788	10.6777	10.4295	10.5048	10.5325	10.6448	10.6239	10.7425	10.92	10.7241
2810006K23Rik	8.35068	8.36679	8.23247	8.39605	8.49459	8.47767	8.33051	8.45663	8.48706	8.64585	8.86775	8.66448
2810403A07Rik	10.0839	10.1445	10.1967	9.97057	10.1041	9.97598	10.0165	9.98139	9.98668	9.88985	9.90438	10.0163
2810474O19Rik	8.70674	8.45948	8.96266	8.98842	9.14299	8.92899	8.63614	8.68312	9.01661	8.89352	8.89176	8.99488
3110001I22Rik	6.67162	6.74515	6.85757	6.56882	6.65489	6.55708	6.93357	6.78376	6.72385	7.13749	7.45946	7.08891
3110002H16Rik	8.27882	8.20993	8.23786	8.12855	8.16411	8.02156	8.27248	8.14863	8.31926	8.20002	8.25761	8.21858
3110009E18Rik	6.19536	6.41013	6.4685	6.73017	6.0513	6.41746	6.33839	6.49281	6.49482	6.57752	6.52834	6.46541
3110035E14Rik	5.2915	5.05844	5.42999	5.05844	5.05844	5.39957	5.40487	5.4768	5.31474	5.4223	5.46007	5.30909
3110040N11Rik	7.49081	7.92611	8.12017	7.84503	7.78689	7.92872	7.72794	7.98418	8.05521	8.27729	8.6025	8.59798
3110043O21Rik	7.82876	7.8099	8.10843	7.96758	7.95218	7.75444	8.05084	8.11427	8.12326	8.18405	8.56308	8.44222
3110062M04Rik	8.80616	8.77943	8.97551	9.04684	8.81622	8.94559	8.89639	8.93807	8.83776	9.11569	9.00607	9.09977
3110082I17Rik	9.6469	9.70073	9.75175	9.91183	9.56587	9.74341	9.84816	9.83437	9.82648	9.96722	10.3477	10.2339
3830406C13Rik	8.47362	8.54646	8.40497	8.63425	8.49789	8.63657	8.67782	8.83731	8.75165	8.84058	9.0024	9.02604
4430402I18Rik	6.05547	6.27074	6.33379	6.12569	6.28207	6.34017	6.15697	6.0927	6.03372	6.3771	6.20292	6.46541
4833420G17Rik	9.03772	9.15244	9.10685	9.0518	8.87318	9.02584	9.10381	9.06817	9.04581	9.02382	8.75008	8.79874
4833439L19Rik	11.0303	11.1066	11.0175	11.0596	10.9639	10.9595	11.0074	11.0269	10.9734	11.109	10.8486	10.7873
4921507P07Rik	5.2915	5.50745	5.69851	5.3946	5.50944	5.53977	5.65564	5.30054	5.56905	5.50349	5.05844	5.30909
4921524J17Rik	8.81742	9.10189	8.95295	8.75523	8.42329	8.70982	8.90518	9.1615	9.11629	9.15681	9.40883	9.39677
4921536K21Rik	7.45412	7.16502	7.24367	7.52514	7.60531	7.32932	7.42775	7.29845	7.2281	7.31049	7.5554	7.32707
4930402H24Rik	8.69763	8.52092	8.31628	8.43098	8.35553	8.42314	8.27703	8.35567	8.22981	8.18405	7.99226	8.34616
4930404N11Rik	5.52305	5.57622	5.42999	5.05844	5.73157	5.59597	5.05844	5.30054	5.73133	5.68539	5.62462	6.29952
4930430F08Rik	8.15026	8.40925	8.40974	8.38421	8.44403	8.23662	8.45197	8.65966	8.69736	8.81336	8.81013	8.73491
4930432K21Rik	7.63487	7.80275	7.79218	7.63124	7.5672	7.56954	7.64463	7.83461	8.04354	7.94522	7.78239	7.52062
4930453N24Rik	9.66408	9.67219	9.80118	9.80289	9.73548	9.80366	9.89285	9.94464	10.171	10.1381	10.3634	10.3567
4930503L19Rik	8.80899	8.85613	8.68961	8.63093	8.47793	8.61245	8.83947	8.61156	9.04292	8.95082	9.18808	9.17998
4930505A04Rik	5.38768	5.74071	5.32153	5.05844	5.28462	5.39957	5.40487	5.30054	5.05844	5.4223	5.34289	5.30909
4930539E08Rik	5.71273	5.31837	5.32153	5.46969	5.05844	5.53977	5.30369	5.30054	5.62858	5.57167	5.05844	5.30909
4930563E22Rik	5.57734	5.50745	5.8804	5.7263	5.44941	5.69301	5.5472	5.5973	5.6822	5.90196	5.98726	5.80306
4930579G24Rik	9.15305	9.18248	9.11267	9.16157	9.18442	9.28235	9.2601	9.2647	9.40217	9.30066	9.48424	9.48081
4930590J08Rik	5.46124	5.78687	5.74887	5.68385	5.56216	5.69301	5.65564	5.4768	5.9686	5.90196	5.54955	5.55788
4931406C07Rik	10.557	10.5189	10.3813	10.4131	10.2945	10.3195	10.8012	10.8463	10.793	10.7398	10.8353	10.7446
4931406P16Rik	11.2062	11.0736	11.0291	11.0948	11.1269	10.9554	11.1644	11.0642	10.9967	10.9908	10.7288	10.8989
4931414P19Rik	7.43916	7.53443	7.53221	7.51776	7.66056	7.39771	7.63023	7.52982	7.52344	7.3504	7.35613	7.58462
4931428F04Rik	6.86253	6.89666	7.30873	7.1927	6.87131	6.89595	6.41815	6.93644	6.81607	6.83895	6.81602	6.42632
4932438A13Rik	9.92722	9.64504	9.44113	9.40596	9.6845	9.51659	9.74792	9.50458	9.41563	9.21765	9.13553	9.40109
4933405L10Rik	5.05844	5.31837	5.51288	5.6381	5.05844	5.59597	5.40487	5.64805	5.05844	5.50349	5.05844	5.41247
4933411K16Rik	5.52305	5.31837	5.42999	5.29641	5.05844	5.05844	5.30369	5.30054	5.05844	5.05844	5.34289	5.05844
4933424G06Rik	5.05844	5.50745	5.05844	5.46969	5.05844	5.39957	5.40487	5.05844	5.05844	5.50349	5.85417	5.66863
4933427D14Rik	8.54325	8.19918	8.64596	8.48736	8.22151	8.51165	8.24951	8.36402	8.31444	8.04333	8.17462	8.20865
4933430I17Rik	5.46124	5.98111	5.83924	5.80351	5.6937	5.73606	5.93046	5.73772	5.73133	5.93837	5.90115	5.84239
4933434E20Rik	10.8628	10.9075	10.8417	10.9858	11.0311	11.0393	11.0986	11.3574	11.472	11.5561	11.9537	11.8441
5031439G07Rik	13.14	13.0142	13.068	13.164	13.249	13.0969	13.2814	13.2069	13.2304	13.1189	12.7891	12.987
5330417C22Rik	5.75169	6.04706	5.91939	5.58818	5.97642	5.97916	6.05118	6.28101	6.15082	5.68539	5.80393	5.61614
5730409E04Rik	7.81741	8.18835	7.93945	8.0403	8.09551	8.20454	7.97406	8.03768	7.9402	8.05512	8.29433	8.20366
5730455P16Rik	9.30633	9.36966	9.3554	9.19337	9.26771	9.18797	9.35912	9.31684	9.38403	9.22797	9.22312	9.20245
5730480H06Rik	7.81741	7.93265	8.275	7.93522	7.9811	8.17644	8.13371	8.34305	8.64859	8.6027	8.89176	8.99202
5730559C18Rik	6.21675	5.78687	6.17848	5.83903	6.09781	6.27813	5.99303	6.06619	6.12295	5.86371	5.90115	6.10042
6030458C11Rik	9.86107	9.76878	9.91696	9.73826	9.67147	9.68546	9.8542	9.8682	9.68001	9.70488	9.68243	9.74816
6330403K07Rik	5.52305	5.05844	5.32153	5.46969	5.05844	5.29994	5.05844	5.40042	5.31474	5.31606	5.05844	5.66863
6430548M08Rik	8.3072	8.26761	8.29579	8.2071	8.13023	8.04773	8.41125	8.14863	8.16148	8.31194	7.83372	7.88511
6430550D23Rik	5.71273	5.74071	5.42999	5.3946	5.37799	5.29994	5.65564	5.05844	5.42043	5.05844	5.34289	5.66863
6430571L13Rik	5.71273	5.63658	5.69851	5.53278	5.50944	5.53977	5.5472	5.40042	5.56905	5.50349	5.46007	5.4915
6430573F11Rik	6.00343	5.78687	5.83924	5.68385	5.50944	5.97916	5.96236	6.14345	5.62858	5.57167	5.54955	5.55788
8030462N17Rik	8.94083	8.93535	8.8796	8.90846	9.12182	9.09687	8.99017	9.04514	9.20173	9.15139	8.94624	8.90323
9030624J02Rik	11.003	10.9437	11.0451	11.0367	11.0718	11.0641	10.9808	10.9189	10.9757	10.7936	10.5614	10.6981
9130008F23Rik	7.02758	6.88233	7.10294	6.8475	6.70651	6.8711	6.89609	7.12499	6.49482	7.13749	7.47046	7.44479
9130011E15Rik	8.93052	8.84932	8.82023	8.87518	9.05858	8.87221	8.93978	8.96832	8.80394	9.05317	8.85152	8.68242
9130401M01Rik	9.67952	9.77057	9.8697	9.98359	9.9364	9.86294	9.76885	9.9041	10.1457	10.0796	10.3156	10.3012
9230110C19Rik	7.6152	7.66728	7.8142	7.74855	7.70785	8.0632	8.00748	7.84671	8.04939	8.33137	8.38781	8.28145
9330159F19Rik	6.21675	6.47343	6.54978	6.19588	6.24409	6.50678	6.62722	6.54398	6.12295	6.35483	6.2344	6.44604
9330182L06Rik	8.39286	8.09858	7.8142	8.07528	7.93257	8.16695	8.05084	8.08413	7.86899	7.76212	7.77364	7.68985
9430015G10Rik	8.83413	8.79013	8.80228	8.88914	8.92306	8.82211	8.87866	8.81325	8.78672	9.07049	9.21048	9.23914
9530068E07Rik	12.0135	12.0238	12.0802	12.0502	12.0176	12.0517	11.991	11.9746	12.062	12.1764	12.3757	12.3021
9530077C05Rik	6.05547	6.13741	5.79556	6.0757	5.92239	5.85036	6.27422	5.88668	6.06449	6.46175	6.29446	6.10042
9930012K11Rik	7.93219	7.93916	7.85722	7.736	7.96189	7.91738	7.96274	7.96772	7.82855	7.95156	8.51739	8.24309
9930021J03Rik	9.11714	8.8629	8.79141	8.75217	8.89833	8.95382	8.88459	8.86975	8.53334	8.76798	8.0864	8.43799
9930104L06Rik	7.56132	7.66728	7.55	7.67147	7.44595	7.53989	7.60836	7.52221	7.56553	7.55928	7.88321	8.07278
A130010J15Rik	8.45205	8.52949	8.35639	8.43863	8.43715	8.67033	8.62907	8.4644	8.72295	8.69148	8.97647	8.68953
A230050P20Rik	5.38768	5.31837	5.32153	5.53278	5.37799	5.05844	5.40487	5.40042	5.8195	6.1834	5.85417	5.30909
A2ml1	5.05844	5.05844	5.05844	5.29641	5.6937	5.29994	5.05844	5.30054	5.42043	5.50349	5.62462	5.05844
A430005L14Rik	8.99629	9.05836	9.23784	9.17528	9.30949	9.19723	9.28046	9.45506	9.62124	9.72867	9.86063	9.89615
A430033K04Rik	7.56817	7.2541	7.52323	7.31013	7.34344	7.37247	7.29532	7.47561	7.41674	7.46342	7.10715	7.24906
A430105I19Rik	7.27952	7.1765	7.17521	7.15433	7.42464	7.59137	6.77622	7.02867	6.72385	6.95104	7.14977	7.20825
A530016L24Rik	6.49259	6.47343	6.30953	6.39887	6.26327	6.62082	6.10564	6.28101	6.27898	6.28495	6.13664	6.42632
A830010M20Rik	7.09777	7.37733	6.98624	7.25724	7.12895	7.41427	7.14809	7.43551	7.19567	7.21601	7.36801	7.22882
AA467197	5.52305	5.50745	5.83924	5.83903	5.65326	5.77636	5.93046	5.95107	6.06449	6.00652	6.35112	6.25348
AA986860	5.75169	5.83006	6.14997	5.46969	5.6937	5.77636	5.82586	6.01062	6.03372	5.86371	5.46007	6.0431
Aaas	10.3422	10.2121	10.4099	10.3094	10.2019	10.197	10.1768	10.3125	10.1497	10.0696	9.97136	10.0675
Aacs	11.4195	11.4398	11.4517	11.4121	11.233	11.3483	11.5259	11.4679	11.3356	11.2967	11.0254	11.1805
Aaed1	8.70067	8.74682	8.762	8.73988	8.86043	8.76707	8.81791	8.71922	8.9378	8.97557	9.1051	9.23188
Aagab	9.94265	9.93966	9.89857	9.99521	9.79809	9.93514	10.0484	10.1294	10.1497	10.1611	10.3419	10.1076
Aak1	11.5756	11.5367	11.563	11.5254	11.5991	11.4279	11.5568	11.3058	11.2889	11.3294	11.0619	11.3008
Aamdc	6.75168	6.99259	6.71371	6.74379	6.79173	6.89595	6.9212	6.9834	6.57033	7.09037	6.83412	7.10023
Aamp	11.6526	11.7598	11.8026	11.7755	11.7079	11.7472	11.7275	11.7535	11.6402	11.6229	11.5679	11.7137
Aar2	10.9275	10.8928	10.9232	10.9657	11.0619	10.995	11.0283	11.0527	10.9004	11.0802	11.2977	11.0738
Aars	13.3572	13.4024	13.4877	13.5157	13.5221	13.4622	13.3311	13.2927	13.2418	13.1432	12.9204	13.1
Aars2	9.20741	9.02256	9.10393	9.32015	9.14299	9.07442	8.9984	8.91	8.8277	8.71376	8.54801	8.58277
Aarsd1	10.4451	10.5028	10.5502	10.5312	10.4499	10.4973	10.4749	10.5375	10.5395	10.4782	10.3186	10.3776
Aasdh	7.40101	7.33752	7.2874	7.55426	7.32813	7.56219	7.70758	7.61797	7.70708	7.38915	7.6059	7.63825
Aasdhppt	9.56944	9.55829	9.75175	9.6097	9.46706	9.5904	9.70511	9.83586	9.81975	10.2635	10.4704	10.3455
Aass	5.9479	6.07822	6.12055	6.28208	6.12018	5.97916	6.5618	6.4018	6.64109	6.2355	5.98726	6.32177
Aatf	10.3373	10.4411	10.5133	10.5783	10.3841	10.5406	10.469	10.447	10.3796	10.3079	10.1976	10.2673
Aatk	7.79443	7.35757	7.2766	7.08431	7.43888	7.28471	7.13765	6.91227	6.81607	6.86794	6.68104	6.60917
Abat	8.96631	8.87635	8.66993	8.88357	9.05858	8.92621	8.83641	8.63925	8.69367	8.77506	8.62659	8.7211
Abca1	8.35456	8.10436	8.50633	8.60403	8.70359	8.61245	8.43176	7.8101	8.18815	8.31194	7.93099	8.52821
Abca12	10.7329	10.5527	10.2211	10.1796	10.0198	9.7915	10.178	10.0014	9.50648	9.50533	9.00972	9.1209
Abca13	6.00343	5.78687	5.91939	5.76604	5.60969	5.59597	5.48222	6.03886	5.77688	5.4223	5.46007	5.66863
Abca2	10.4214	10.354	10.5373	10.5697	10.709	10.6079	9.86919	9.79667	9.85637	9.94241	9.87869	10.0579
Abca3	10.4232	10.0751	10.0071	10.2503	10.2935	10.1443	10.0431	9.96382	9.88726	9.91239	9.4335	9.82245
Abca4	5.57734	5.94603	5.79556	5.76604	5.83342	5.77636	5.96236	5.91954	5.62858	5.90196	5.69046	6.18007
Abca5	8.70977	8.49053	8.60507	8.60742	8.63628	8.89804	8.84861	8.73853	9.0225	8.7821	8.60735	8.74176
Abca7	9.56612	9.49015	9.50444	9.40402	9.62566	9.3668	9.4256	9.27132	9.14624	9.21765	8.84334	9.25833
Abca8b	6.86253	6.80804	6.76361	6.79676	6.96659	6.83285	7.1789	6.86248	7.24927	6.93757	7.07793	7.10023
Abca9	5.38768	5.42554	5.05844	5.3946	5.05844	5.05844	5.05844	5.30054	5.05844	5.50349	5.34289	5.30909
Abcb10	9.65941	9.73239	9.65548	9.6347	9.50838	9.58864	9.6454	9.66892	9.65943	9.68632	9.84438	9.53291
Abcb1a	5.38768	5.31837	5.32153	5.29641	5.28462	5.05844	5.05844	5.40042	5.31474	5.4223	5.34289	5.61614
Abcb1b	9.68718	9.58507	9.74989	10.0283	10.0593	9.95298	9.88107	9.81941	10.1254	10.1257	10.2213	10.0275
Abcb4	5.46124	5.42554	5.51288	5.3946	5.37799	5.05844	5.40487	5.05844	5.50121	5.05844	5.34289	5.05844
Abcb6	10.6809	10.6552	10.6109	10.8231	10.8733	10.7155	10.7799	10.869	10.9092	10.8802	10.8907	10.7404
Abcb7	11.7681	11.5915	11.5725	11.6075	11.7901	11.7705	11.819	11.8146	12.0061	11.9981	12.1048	11.9049
Abcb8	10.6271	10.6688	10.5882	10.6673	10.537	10.6062	10.4875	10.5365	10.5189	10.4052	10.4302	10.3286
Abcb9	6.96415	6.8383	6.4033	6.63013	6.51469	6.62082	6.5618	6.52718	6.12295	6.09935	6.17037	6.22962
Abcc1	10.4912	10.4298	10.4733	10.4454	10.5895	10.5505	10.245	10.1558	10.1443	10.2152	9.79451	10.1273
Abcc10	7.8117	7.80275	8.01078	7.77331	7.74794	7.64791	7.69384	7.56725	7.68448	7.76935	7.54507	7.5689
Abcc2	5.38768	5.50745	5.58246	5.3946	6.24409	5.85036	5.65564	5.77812	5.42043	5.4223	6.02711	6.01294
Abcc4	10.5309	10.3469	10.2583	10.1278	10.2802	10.3216	10.3057	10.3813	10.171	10.1435	9.87869	10.0303
Abcc5	10.5603	10.5836	10.6574	10.4835	10.4776	10.4926	10.6183	10.4185	10.4885	10.5852	10.3591	10.4912
Abcd1	7.86777	7.9063	7.79956	7.78553	7.71943	7.73508	7.91062	7.97871	7.66151	7.85331	7.40304	7.72555
Abcd2	5.85645	5.87076	5.79556	5.6381	5.60969	5.77636	5.82586	5.77812	5.8195	5.93837	5.69046	5.98165
Abcd3	11.3158	11.2657	11.294	11.2854	11.3236	11.3343	11.3108	11.3382	11.3106	11.277	11.2969	11.2461
Abcd4	7.87872	7.8099	7.87824	7.74229	7.50794	7.77982	7.65887	7.5524	7.80788	7.45436	7.5136	7.68985
Abce1	12.6512	12.5963	12.5348	12.5879	12.7023	12.6991	12.6935	12.7174	12.7955	12.7756	12.8107	12.677
Abcf1	12.5043	12.537	12.5242	12.5617	12.539	12.4986	12.5645	12.5185	12.3212	12.2533	12.0786	12.1988
Abcf2	12.0272	11.9769	12.0739	11.9857	12.0479	12.0574	12.0372	11.9154	11.9415	11.9165	11.9518	11.7872
Abcf3	10.3108	10.3263	10.3849	10.4962	10.4809	10.5159	10.5887	10.6209	10.6211	10.6208	10.5897	10.3939
Abcg2	8.60638	8.58393	8.61746	8.72437	8.68634	8.75769	8.65365	8.86391	8.63709	8.83043	9.23566	8.80856
Abcg4	5.82326	5.69093	5.91939	5.90522	5.60969	5.69301	5.78732	5.5973	5.50121	5.82336	5.69046	5.91518
Abhd1	5.75169	6.01473	5.91939	5.7263	5.56216	5.77636	5.99303	5.98139	5.8195	5.97316	5.62462	5.84239
Abhd10	8.96883	8.91921	8.92339	9.00645	8.90331	9.05161	9.06518	9.20598	9.22232	9.29085	9.65241	9.37717
Abhd11	8.19443	8.30812	8.43801	8.53803	8.25721	8.41517	8.43582	8.34305	8.47417	8.68021	8.67358	9.01196
Abhd12	10.4177	10.492	10.3789	10.4926	10.5841	10.5251	10.4331	10.561	10.6182	10.5922	10.7841	10.5651
Abhd13	10.2491	9.96809	10.0606	10.0716	10.1538	10.1431	10.2936	10.2855	10.3106	10.5091	10.7572	10.5918
Abhd14a	8.25819	8.2573	8.28543	8.39605	8.27666	8.25464	8.45197	8.51766	8.48278	8.76443	8.67358	8.60928
Abhd14b	7.65426	7.75906	7.70827	7.61757	7.52133	7.72203	7.60099	7.53739	7.47115	7.60883	7.20449	7.69707
Abhd15	6.88584	6.92483	6.91641	6.74379	6.89313	6.75253	6.9212	6.75634	6.65812	6.5957	6.68104	6.73681
Abhd16a	9.69479	9.71572	9.77576	9.92404	9.77932	9.6871	10.8623	10.8602	11.06	11.0252	11.0654	10.9535
Abhd17a	10.5744	10.7114	10.6623	10.767	10.7549	10.8133	10.6714	10.7127	10.7415	10.7953	10.8668	10.8126
Abhd17b	8.98388	8.92245	8.79867	8.7306	8.82937	9.04649	8.99566	9.12538	9.21463	9.18358	9.51024	9.35951
Abhd17c	10.0989	9.86937	9.95303	9.86474	9.95444	10.0105	9.97965	10.0146	9.86945	9.87845	9.65241	9.83048
Abhd18	7.00679	7.19915	7.10294	7.27511	7.19025	7.17103	7.12713	7.52982	7.36002	7.21601	7.14977	7.57678
Abhd2	9.83788	9.85252	9.91363	9.8449	10.0176	10.017	9.87217	9.85212	9.90643	9.83361	9.89652	9.90833
Abhd3	5.67111	5.83006	5.42999	5.53278	5.65326	5.91745	5.99303	5.98139	5.73133	5.50349	5.34289	5.71672
Abhd4	10.1239	10.059	9.96753	10.0003	10.0791	10.0518	9.8855	10.0014	9.77872	9.78559	9.64773	9.74137
Abhd5	10.1814	10.0605	10.141	10.2318	10.0922	10.2612	10.3221	10.4586	10.6006	10.6735	11.0055	10.6893
Abhd6	8.16366	8.34751	8.2592	8.31517	8.34821	8.19056	8.3479	8.51766	8.44804	8.47787	8.88778	8.63162
Abhd8	11.3407	11.3237	11.3275	11.3932	11.4635	11.4328	11.3407	11.3922	11.307	11.2777	11.1312	11.214
Abi1	11.0806	11.0729	11.1104	10.9878	11.0877	11.121	10.9195	10.9624	11.0742	11.0695	11.2515	11.2035
Abi2	11.115	11.0988	10.9775	11.0127	11.1348	11.0186	11.0402	11.1042	11.1411	11.1263	10.8748	10.8712
Abi3	6.57066	6.71241	6.20615	6.43506	6.68099	6.60521	6.52761	6.69952	6.17787	6.33207	5.94538	6.38575
Abl1	12.1707	12.1928	12.0548	12.0505	12.0944	12.025	11.8742	11.785	11.5658	11.479	11.1966	11.4902
Abl2	10.9802	10.8115	10.7224	10.7126	10.8427	10.6993	10.7446	10.5237	10.3751	10.2834	10.0724	10.36
Ablim1	9.18591	9.03758	8.92339	8.89191	8.9854	8.74508	9.22785	9.13268	8.83776	8.93829	8.53788	8.68953
Abr	10.0977	9.89428	10.0287	9.87875	10.0548	9.98268	9.95738	9.96789	9.76477	9.71041	9.72521	9.86993
Abracl	10.2262	10.3942	10.4216	10.3	10.3011	10.5048	10.419	10.4787	10.6479	10.848	10.9714	11.3191
Abraxas1	7.98368	8.26761	8.32136	8.38421	8.19311	8.29434	8.2072	8.42111	8.6562	8.67265	8.91926	9.00629
Abraxas2	9.37629	9.39318	9.36762	9.48693	9.60143	9.498	9.49881	9.61793	9.51066	9.50109	9.56086	9.61513
Abt1	8.80616	8.77584	8.70902	8.80029	8.89334	8.8952	8.84252	8.8551	8.71933	8.91608	8.95386	9.01761
Abtb1	8.38907	8.61241	8.63787	8.61754	8.50777	8.51538	8.53762	8.49128	8.66377	8.59471	8.60735	8.41666
Abtb2	8.80616	8.84591	9.08627	9.17756	9.30949	9.08943	8.7577	8.62547	8.72295	8.54166	8.32421	8.73147
Acaa1a	9.67027	9.77773	9.90361	9.95479	9.64208	9.73232	9.70678	9.87401	10.0412	9.95332	9.89652	10.0538
Acaa1b	5.38768	5.05844	5.05844	5.3946	5.37799	5.29994	5.05844	5.54096	5.05844	5.31606	5.46007	5.41247
Acaa2	9.35912	9.42548	9.285	9.31809	9.2754	9.22918	9.30937	9.42964	9.28481	9.42469	9.44972	9.27491
Acaca	12.3183	12.1871	12.0301	12.0786	12.2114	12.0149	12.2508	12.0194	11.8891	11.7431	11.3242	11.6459
Acacb	7.75922	7.82409	7.66837	7.74229	7.67848	7.52481	7.84413	7.83461	7.68448	7.72538	7.56565	7.64574
Acad10	7.40101	7.45356	7.44915	7.40998	7.12895	7.39771	7.64463	7.42735	7.46223	7.38915	7.5554	7.60786
Acad11	8.80899	8.72838	8.91006	8.89468	8.9206	8.86641	8.9168	8.65966	8.68997	8.66885	8.4378	8.61677
Acad12	6.67162	6.55249	6.44721	6.64496	6.64162	6.5238	6.61121	6.86248	6.72385	6.71548	6.52834	6.60917
Acad8	9.19239	9.27659	9.22983	9.20901	9.20671	9.21329	9.21615	9.28883	9.27252	9.28839	9.34956	9.27019
Acad9	10.2899	10.3719	10.3607	10.452	10.3554	10.3268	10.3134	10.3598	10.5127	10.4389	10.4836	10.5555
Acadl	10.9468	11.0014	11.0796	11.0121	10.8802	10.9837	11.2033	11.2059	11.3314	11.4027	11.4669	11.3733
Acadm	10.3861	10.4745	10.3968	10.2927	10.1724	10.249	10.47	10.5356	10.4747	10.5548	10.8577	10.668
Acads	10.2018	10.3576	10.1579	10.2416	10.2059	10.3216	10.245	10.2823	10.3249	10.3462	10.5564	10.4912
Acadsb	9.86648	9.8286	9.95465	9.77469	9.92913	9.98668	10.0445	10.0014	10.171	10.2421	10.3303	10.2315
Acadvl	9.92851	9.9821	10.2983	10.0777	10.2726	10.2051	10.0232	10.1403	10.0979	10.0965	10.1018	10.0877
Acap1	5.82326	5.83006	5.51288	5.46969	5.37799	5.39957	5.60425	5.30054	5.31474	5.05844	5.05844	5.4915
Acap2	10.6183	10.4046	10.3813	10.3908	10.5162	10.4775	10.32	10.3231	10.2618	10.2535	10.0228	10.1934
Acap3	9.48932	9.36729	9.3749	9.45546	9.38601	9.33989	9.11141	9.32959	9.09969	9.15139	8.7847	8.94831
Acat1	11.7294	11.6579	11.6404	11.5787	11.5749	11.6714	11.7155	11.8044	11.7886	11.8848	12.0846	12.0138
Acat2	12.2031	12.2147	12.3148	12.2456	12.2622	12.2954	12.4139	12.5208	12.5249	12.5497	12.6839	12.5857
Acat3	5.46124	5.31837	5.05844	5.05844	5.28462	5.29994	5.05844	5.30054	5.62858	5.6315	5.05844	5.4915
Acbd3	10.5686	10.5125	10.5861	10.574	10.6063	10.4982	10.4591	10.5484	10.4499	10.3224	10.2949	10.2943
Acbd4	7.74728	7.65136	7.82147	7.92426	7.9906	7.81705	7.93402	7.8039	7.73664	7.87352	7.80829	7.99956
Acbd5	9.16848	9.08464	9.14145	8.98062	9.11968	9.20643	9.22785	9.11805	9.28969	9.28098	9.26346	9.17998
Acbd6	10.426	10.4377	10.4228	10.4473	10.5505	10.3967	10.4905	10.6457	10.4368	10.4455	10.3634	10.4962
Accs	7.08798	7.05688	7.2874	7.14455	7.10176	7.2572	6.81751	6.92442	7.10503	7.13749	7.13572	6.95727
Acd	9.24531	9.46374	9.4084	9.46107	9.33177	9.18098	9.35486	9.24688	9.31146	9.3225	9.12546	9.15971
Ace	5.46124	5.05844	5.32153	5.29641	5.28462	5.05844	5.05844	5.30054	5.50121	5.05844	5.34289	5.05844
Acer2	8.78625	8.5674	8.35143	8.29843	8.56247	8.43893	8.64317	8.7289	8.36195	8.55819	8.12781	8.25278
Acer3	8.15474	8.11585	7.95927	8.00441	8.21345	8.20917	8.40297	8.48747	8.58217	8.85066	9.16204	9.0971
Ache	6.73871	6.62632	6.53001	6.52054	6.94604	6.75253	6.1816	6.28101	6.0942	6.1834	6.10161	6.42632
Acin1	12.0347	12.1092	12.1489	12.1018	11.9333	11.9942	11.886	11.7527	11.5833	11.4219	11.2376	11.553
Ackr3	7.85674	7.69081	7.01312	7.20211	7.07398	7.05726	7.86258	7.8587	7.46223	7.29007	7.29505	7.553
Ackr4	5.38768	5.05844	5.42999	5.05844	5.05844	5.39957	5.65564	5.4768	5.05844	5.4223	5.34289	5.05844
Acly	14.0809	14.1013	14.0655	14.1079	14.0077	14.0319	14.1039	14.0761	13.9363	13.7943	13.4748	13.5723
Aco1	10.6515	10.5978	10.6161	10.7327	10.7692	10.6697	10.6662	10.6792	10.6779	10.3801	10.3591	10.478
Aco2	13.3007	13.2364	13.2098	13.2267	13.2699	13.2998	13.2226	13.2547	13.1084	13.0589	13.0909	13.044
Acot1	9.35527	9.23031	8.8693	8.95432	8.96413	8.90088	9.57214	9.58645	9.22742	9.42693	9.17186	8.98914
Acot11	6.97495	7.22141	6.85757	6.77057	6.30054	6.5894	7.15844	7.05072	6.58844	6.82419	6.43069	6.53961
Acot13	9.43574	9.68938	9.50444	9.51234	9.4485	9.78232	9.70511	9.89841	10.1322	10.2685	10.7244	10.759
Acot2	8.82022	8.8078	8.82379	8.89745	8.85015	8.81006	8.90518	9.04256	9.13813	9.04734	8.94242	8.94831
Acot7	11.245	11.3911	11.244	11.2325	11.1655	11.3111	11.2027	11.2551	11.0593	11.1242	11.2864	11.2716
Acot8	7.45412	7.87943	7.62726	7.68462	7.59273	7.66853	7.73466	8.02184	7.75119	8.05512	8.17462	8.10532
Acot9	9.65473	9.68558	9.62326	9.66089	9.87586	9.89878	9.82375	9.94877	10.1972	10.2293	10.6805	10.6822
Acox1	10.7143	10.6069	10.6474	10.5576	10.7377	10.6114	10.6637	10.5402	10.3249	10.1904	9.99546	10.2351
Acox3	8.1322	8.18835	8.18305	8.0554	8.1515	8.15259	8.0877	8.07905	7.9402	7.79791	7.85868	8.07278
Acp1	11.2574	11.2626	11.3442	11.3607	11.4062	11.3669	11.4186	11.5879	11.5902	11.7937	11.957	11.8843
Acp2	9.74409	9.67795	9.59239	9.70719	9.72711	9.78692	9.69168	9.81489	9.70579	9.59966	9.7839	9.59076
Acp6	8.74558	8.76864	8.91674	8.76132	8.81622	8.85179	8.82101	8.98993	8.86097	8.85066	8.79747	9.02043
Acp7	5.71273	5.94603	5.91939	5.90522	5.83342	5.6466	6.15697	6.2147	5.89773	5.90196	5.80393	6.0431
Acpp	9.56944	9.2459	9.26684	9.36867	9.34826	9.42703	9.10888	9.30828	9.19132	9.18623	9.18808	9.43098
Acrbp	5.97614	5.83006	5.91939	5.99487	5.86428	5.85036	5.82586	5.64805	5.93397	6.0695	6.2344	6.25348
Acsbg1	6.19536	6.1083	6.14997	6.23993	6.28207	6.18885	6.02261	6.11843	6.20416	6.00652	5.98726	5.80306
Acsf2	10.0101	9.99597	10.0086	10.0581	9.89093	9.77307	10.0218	9.92381	9.8062	9.71957	9.37243	9.53094
Acsf3	9.15526	9.32388	9.3603	9.11487	9.28114	9.22918	9.15374	9.20598	9.19654	9.1405	9.15216	9.0006
Acsl1	9.69783	9.647	9.62936	9.64129	9.69169	9.70179	9.79264	9.79819	9.6948	9.55532	9.55088	9.53291
Acsl3	11.3237	11.3437	11.2902	11.2493	11.1931	11.1862	11.4398	11.3517	11.4558	11.4375	11.5329	11.37
Acsl4	10.0003	10.0487	10.021	9.89952	10.2475	10.0795	10.2125	10.1172	10.4981	10.5782	10.5589	10.3644
Acsl5	11.2959	11.3515	11.3442	11.4369	11.397	11.426	11.9794	11.995	11.995	12.0838	12.2865	12.2194
Acsl6	6.10455	6.21962	6.44721	5.87287	6.40479	6.18885	6.5618	6.51013	6.03372	6.09935	6.17037	6.07223
Acsm3	5.05844	5.50745	5.32153	5.68385	5.44941	5.29994	5.48222	5.69457	5.62858	5.05844	5.05844	5.05844
Acss1	6.65773	6.88233	6.54978	6.58446	6.57287	6.21196	6.51011	6.83681	6.37074	6.2355	6.32319	6.07223
Acss2	8.45566	8.54646	8.38574	8.59722	8.50777	8.49287	8.67439	8.65628	8.6524	8.55819	8.24516	8.52423
Actb	15.8165	15.8021	15.8615	15.9483	16.026	15.9948	15.8255	15.8459	15.9159	15.8031	15.6743	15.6905
Actg1	15.3973	15.3994	15.4779	15.4336	15.4232	15.4889	15.3591	15.3666	15.3606	15.3122	15.3013	15.3728
Actg2	5.05844	5.42554	5.42999	5.53278	5.50944	5.59597	5.05844	5.05844	5.62858	5.05844	5.46007	5.66863
Actl10	5.38768	5.57622	5.05844	5.29641	5.56216	5.39957	5.48222	5.64805	5.05844	5.6315	5.34289	5.66863
Actl6a	11.4942	11.6021	11.5866	11.5021	11.4517	11.6204	11.5306	11.647	11.6553	11.8778	12.098	11.8996
Actn1	11.4784	11.4577	11.4437	11.5356	11.5243	11.4973	11.1137	11.0654	10.9597	10.9495	10.6078	10.9601
Actn2	5.05844	5.42554	5.42999	5.3946	5.37799	5.05844	5.05844	5.30054	5.05844	5.6315	5.05844	5.30909
Actn3	5.88818	5.87076	5.8804	5.83903	5.83342	5.85036	5.48222	5.73772	5.56905	5.6315	5.80393	5.4915
Actn4	13.7319	13.7527	13.6812	13.7565	13.7399	13.691	13.5497	13.477	13.3266	13.192	12.9409	13.1991
Actr10	11.1161	11.2179	11.1147	11.2011	11.1717	11.1955	11.2725	11.4525	11.4725	11.5536	11.8473	11.7623
Actr1a	11.8825	11.8563	11.8693	11.9537	11.9495	11.9668	11.9335	11.9412	11.8133	11.8254	11.834	11.7429
Actr1b	12.6198	12.589	12.5639	12.6853	12.6663	12.6428	12.6612	12.6946	12.6299	12.5097	12.3922	12.5102
Actr2	12.6921	12.5662	12.5372	12.6922	12.8942	12.8347	12.7556	12.7895	12.9452	12.8758	12.8524	12.7619
Actr3	13.1138	13.1111	13.1018	13.1631	13.2972	13.3132	13.2945	13.402	13.557	13.6103	13.8178	13.6441
Actr3b	7.04803	6.85316	6.94481	6.8721	7.0067	7.01325	7.11653	6.84971	7.1736	7.16041	7.40304	7.269
Actr5	8.69458	8.7172	8.41449	8.69602	8.71498	8.83108	8.68806	8.73853	8.70105	8.83043	8.74569	8.68598
Actr6	8.12764	8.35718	8.16618	8.02503	8.02337	8.40314	8.49544	8.34305	8.64859	8.94143	9.24498	9.01479
Actr8	9.29634	9.41633	9.39414	9.53554	9.41759	9.43096	9.19724	9.45893	9.19132	9.20464	9.29374	9.17746
Actrt3	5.05844	5.31837	5.32153	5.46969	5.28462	5.29994	5.05844	5.30054	5.31474	5.50349	5.46007	5.05844
Acvr1	9.17067	9.19056	8.97551	9.17528	9.07851	9.22918	9.06779	8.99795	8.95637	8.854	8.8758	9.06474
Acvr1b	7.73523	7.9776	7.86426	7.62442	7.52133	7.9002	7.91062	7.49132	7.54044	7.44524	7.40304	7.40966
Acvr2a	9.18807	9.14136	9.13001	8.98062	9.26192	9.3146	9.33986	9.33802	9.38631	9.38837	9.61217	9.31669
Acvr2b	7.03785	6.8383	6.87254	7.06358	6.83784	6.90819	6.87045	7.13526	6.47511	6.86794	7.09263	6.93179
Acvrl1	9.49107	9.57894	9.23517	9.43663	9.56744	9.36269	9.26692	9.30183	8.99881	8.9477	9.09481	8.97179
Acy1	7.64782	7.57736	7.72391	7.72334	7.54118	7.76719	7.66593	7.78514	7.31083	7.37957	7.35613	7.47902
Acy3	6.97495	7.15345	7.29811	6.89622	6.95636	6.9442	7.03972	6.93644	7.0201	6.71548	6.63945	7.11145
Acyp1	7.40101	7.61897	7.26572	7.45724	6.93564	7.20039	7.38505	7.52982	7.46223	7.71791	7.85041	8.06176
Acyp2	7.18271	7.15345	7.3606	6.98824	6.89313	7.21003	7.36759	7.19522	7.18468	7.40811	8.00716	7.95848
Ada	7.97861	7.83113	7.89895	8.17068	8.06889	7.91738	8.43582	8.54356	8.49984	8.6574	8.84744	8.68598
Adal	8.00873	7.70627	7.73938	7.82154	7.87715	7.6821	8.09806	7.97871	7.77982	7.95787	7.86691	8.10532
Adam10	11.5046	11.4544	11.3723	11.4246	11.4517	11.4333	11.4905	11.4559	11.5537	11.5052	11.371	11.3711
Adam11	6.8507	6.71241	6.95877	6.64496	6.73149	6.68119	6.76214	6.43913	6.20416	6.73163	6.29446	6.34354
Adam12	10.2072	9.96182	9.72354	9.59449	9.49035	9.35651	9.32904	9.32535	8.72657	8.68398	8.33012	8.52821
Adam15	10.4648	10.5157	10.4134	10.5286	10.3788	10.3363	10.3787	10.3231	10.2242	10.2685	10.1879	10.2095
Adam17	10.7965	10.7077	10.9125	10.9472	10.9874	11.0245	10.6067	10.7328	10.8884	10.8014	10.6759	10.7963
Adam19	8.52616	8.57155	8.63787	8.53803	8.67763	8.69021	7.69384	7.59646	7.54044	7.29007	7.39147	7.77403
Adam21	5.05844	5.05844	5.51288	5.29641	5.44941	5.05844	5.5472	5.4768	5.31474	5.31606	5.05844	5.30909
Adam22	6.05547	5.74071	5.95651	6.02268	5.76728	6.11589	5.8624	5.5973	5.85967	5.93837	5.62462	6.01294
Adam23	8.05271	8.17744	7.83588	7.75478	7.52133	7.47068	7.67296	7.66687	7.10503	7.20508	6.86953	7.17678
Adam32	5.2915	5.31837	5.05844	5.3946	5.37799	5.05844	5.05844	5.05844	5.50121	5.31606	5.34289	5.41247
Adam33	5.38768	5.05844	5.32153	5.76604	5.37799	5.05844	5.40487	5.30054	5.42043	5.31606	5.54955	5.4915
Adam8	5.82326	6.13741	5.69851	5.99487	5.6937	5.81435	5.60425	5.64805	5.42043	5.78053	6.10161	5.61614
Adam9	12.7493	12.6888	12.5826	12.4632	12.4472	12.4906	12.3314	12.3167	12.1877	12.0993	11.9461	12.0649
Adamts1	11.8059	11.8247	11.9007	11.8179	11.9465	11.9823	11.1516	11.002	11.133	11.0163	11.0082	11.1986
Adamts10	8.1139	7.85204	7.87127	7.71055	7.73661	7.87107	7.70073	7.82852	7.80092	8.0374	8.0365	8.23334
Adamts12	8.95363	8.64033	8.53275	8.37626	8.5466	8.48529	8.43582	8.36817	8.11214	7.89345	7.86691	8.16823
Adamts13	6.02985	6.13741	5.91939	6.26123	5.94986	6.0365	6.29607	5.98139	5.93397	6.09935	6.06516	6.18007
Adamts14	7.94784	7.89963	7.89895	8.0554	8.25721	8.19056	7.57863	7.70744	7.59828	7.74754	7.74707	7.9821
Adamts20	8.07182	8.14978	8.40497	8.33993	8.40577	8.37877	8.20242	7.95106	8.24003	7.8465	8.05094	8.37301
Adamts4	9.5744	9.47481	9.09218	9.17301	9.29633	9.22692	9.37393	9.25359	8.80051	8.70267	8.87178	8.90323
Adamts5	7.15502	7.27546	7.45864	7.361	7.35858	7.66853	6.89609	6.74239	7.25973	6.82419	7.10715	6.73681
Adamts6	5.9479	6.19301	6.09014	6.17307	5.94986	5.88466	6.31745	6.2147	6.0018	6.52115	6.55145	6.40623
Adamts7	5.88818	5.87076	6.2592	6.0757	5.8939	6.23452	5.99303	5.5973	6.03372	5.6315	5.34289	5.4915
Adamts9	6.58564	6.38817	6.02597	6.10104	6.38812	5.94891	6.05118	6.16781	5.50121	6.0695	5.7497	5.94911
Adamtsl1	5.71273	5.31837	5.69851	5.29641	5.37799	5.29994	5.48222	5.4768	5.42043	5.4223	5.46007	5.30909
Adamtsl2	6.21675	6.13741	6.09014	6.14968	6.00214	6.39866	6.20561	5.98139	5.6822	6.09935	6.10161	6.27676
Adamtsl4	8.04305	8.06337	8.11431	8.20259	8.07782	8.17644	8.09806	8.0892	8.20392	8.05512	8.13459	8.35067
Adamtsl5	8.77186	8.75777	8.89322	8.74604	8.9807	9.1092	8.41949	8.43701	8.51249	8.4337	8.68738	8.91236
Adap1	5.46124	5.31837	5.51288	5.53278	5.6937	5.81435	5.30369	5.4768	5.42043	5.05844	5.05844	5.61614
Adar	10.2522	10.3837	10.2491	10.2395	10.3317	10.2689	11.1559	11.0171	11.032	10.9741	10.7777	10.9291
Adarb1	7.82876	7.67517	7.2766	7.60375	7.64847	7.2572	7.47724	7.52982	7.05719	7.37957	7.13572	7.52062
Adat1	7.65426	7.95209	7.71611	7.90766	7.76477	7.84132	7.66593	8.01652	7.73664	7.74754	7.75599	7.47054
Adat2	8.00873	8.19378	8.17744	8.33583	8.14303	8.3202	8.17826	8.04813	8.45681	8.10699	8.61218	8.71415
Adat3	7.13621	7.34758	7.23251	7.33581	7.2731	7.28471	7.22867	6.88763	7.04495	7.48136	7.19102	7.269
Adck1	8.86428	8.783	8.9819	8.9649	8.8398	8.89804	9.0547	8.94085	8.70105	9.05026	8.8798	9.06747
Adck2	8.73967	8.86964	9.03504	9.09576	8.99242	8.91501	8.79917	8.86391	8.97471	9.0415	9.09825	9.11565
Adck5	8.37384	8.55068	8.65799	8.60063	8.70359	8.49665	8.36933	8.38877	8.69367	8.42017	8.8758	8.66809
Adcy2	6.77721	7.0187	6.64372	6.77057	6.74378	6.41746	6.61121	6.62439	6.65812	6.66565	6.5963	6.01294
Adcy3	10.2512	10.118	10.0696	10.0837	10.1073	10.0274	10.0285	9.95289	9.84482	9.87354	9.57571	9.85113
Adcy6	9.58756	9.54785	9.52639	9.46851	9.50185	9.46199	9.22552	9.24688	8.97167	9.00592	8.728	8.89711
Adcy7	10.6586	10.7179	10.5133	10.6322	10.5701	10.6472	10.3923	10.4382	10.2693	10.3151	10.2071	10.2278
Adcy9	7.93742	7.57736	7.73167	7.79763	7.85121	7.70221	7.76777	7.41913	7.69206	7.8465	7.28249	7.48744
Add1	11.0683	11.1257	11.0481	11.1972	11.1044	11.1107	11.1068	11.1177	10.9436	10.9164	10.7376	10.7873
Add3	9.56944	9.49015	9.37248	9.39038	9.36275	9.37089	9.51797	9.47812	9.37257	9.3297	9.1422	9.29131
Adgb	7.45412	7.57736	7.5588	7.63803	7.68441	7.28471	7.65177	7.52221	7.74393	7.63295	7.28249	7.16612
Adgra2	10.2828	10.2174	10.1438	10.1614	10.2774	10.2992	9.89138	9.94188	9.47469	9.51168	9.62174	9.7208
Adgra3	11.6234	11.4262	11.2552	11.3171	11.3664	11.2419	11.3428	11.3112	11.0679	11.0471	10.8857	10.8382
Adgre5	8.17693	8.12725	8.06655	7.85663	7.88228	7.59137	7.83793	7.79768	7.64597	7.67222	7.35613	7.42734
Adgrf2	6.00343	6.01473	6.09014	5.99487	6.02708	5.85036	5.96236	5.40042	5.56905	6.26054	5.80393	5.66863
Adgrg1	11.521	11.3249	11.2193	11.2122	11.1573	11.0947	11.1873	11.0899	10.774	10.7638	10.4069	10.7033
Adgrg3	5.05844	5.42554	5.05844	5.53278	5.37799	5.29994	5.40487	5.40042	5.42043	5.31606	5.05844	5.55788
Adgrl1	10.2635	10.1569	9.97073	9.78812	9.7313	9.82617	9.83753	9.72942	9.33763	9.4021	8.88778	9.44987
Adgrl2	12.3427	12.2702	12.0773	12.156	12.2036	12.239	12.1114	11.9217	11.7432	11.7095	11.6542	11.8901
Adh1	6.27821	6.53325	6.30953	6.3025	6.45326	6.63621	6.43718	6.54398	6.57033	6.39891	6.45594	6.75183
Adh5	11.1618	11.2574	11.2972	11.2493	11.2251	11.3132	11.2572	11.3528	11.3899	11.3787	11.5753	11.5651
Adh7	9.12846	9.05541	8.83089	9.02931	9.17418	9.26043	9.06518	9.20136	9.13542	9.29577	9.98994	9.65905
Adhfe1	8.63214	8.70215	8.64998	8.52014	8.24935	8.34979	8.56753	8.61853	8.64093	8.60668	8.60735	8.62049
Adi1	11.063	11.132	11.1038	11.0083	10.8946	11.0667	11.1607	11.1892	11.1816	11.2311	11.3949	11.3002
Adipor1	11.9361	11.8991	11.8736	11.8994	11.9528	11.9624	11.9234	11.9318	11.8264	11.8305	11.9036	11.8947
Adipor2	11.0881	11.1698	11.1512	11.2744	11.3433	11.2531	11.1849	11.2506	11.4023	11.2292	11.2553	11.2328
Adk	9.82683	9.88105	9.73866	9.67542	9.56274	9.71311	9.70845	9.97196	9.93004	9.94866	10.2055	10.0729
Adm	5.9479	6.04706	5.74887	5.90522	5.80115	5.94891	5.82586	5.5973	5.85967	5.31606	5.34289	5.66863
Adnp	11.2014	11.4831	11.4193	11.399	11.4066	11.2701	11.2865	11.161	11.0356	11.0413	10.9497	11.1424
Adnp2	9.80306	9.75796	9.75175	9.90226	9.85169	9.92127	9.79735	9.77667	9.8096	9.65801	9.55838	9.62254
Ado	10.7402	10.5907	10.4379	10.4188	10.684	10.5205	10.4895	10.4644	10.4949	10.5589	10.1204	10.1759
Adora2a	6.00343	6.19301	5.91939	5.96609	5.86428	6.14086	5.65564	5.73772	5.73133	5.6315	5.7497	5.80306
Adora2b	6.00343	5.57622	5.79556	5.53278	5.28462	5.73606	5.5472	5.77812	5.85967	5.68539	5.7497	5.41247
Adpgk	9.98301	9.96339	10.0889	9.97318	9.87965	9.90726	10.0758	9.9405	10.0426	10.0624	10.3346	10.1556
Adprh	10.5851	10.7198	10.8711	10.856	10.6519	10.7354	10.6498	10.728	10.8852	11.0281	11.1692	10.955
Adprhl2	9.20527	9.61936	9.57985	9.73056	9.51164	9.45237	9.41949	9.40377	9.53758	9.56958	9.72077	9.70866
Adprm	8.07656	7.9776	7.99169	8.0199	8.00474	7.88279	7.87475	7.96772	8.53748	8.22104	8.42134	8.54008
Adrm1	11.7985	12.0216	12.0939	11.9889	11.86	11.9806	11.8761	11.8308	11.8133	11.8275	11.8164	11.9589
Adsl	11.6662	11.7093	11.6917	11.8223	11.7262	11.8214	11.8085	11.945	11.983	12.0078	12.2779	12.0448
Adss	10.5385	10.6926	10.6849	10.7465	10.7747	10.7936	10.6841	10.8899	11.0181	11.0985	11.207	11.0859
Adssl1	7.57499	7.62714	7.61047	7.53978	7.52133	7.59857	7.64463	7.60367	7.48001	7.47242	7.37979	6.9446
Aebp1	12.7902	12.786	12.8625	12.8123	12.7143	12.7652	12.6138	12.476	12.372	12.3135	12.1171	12.4449
Aebp2	11.6094	11.5144	11.6834	11.6575	11.593	11.5492	11.4312	11.3005	11.2852	11.224	10.8506	11.2353
Aen	10.9777	10.9294	10.9216	10.8715	11.0002	10.9321	10.7176	10.7005	10.6278	10.4857	10.7723	10.7657
Aes	12.5135	12.5357	12.5888	12.4558	12.2378	12.357	12.2822	12.2408	12.0459	11.9841	11.8396	11.9604
Afap1	9.67182	9.50534	9.50001	9.43663	9.57834	9.50918	9.69168	9.24464	9.12179	9.12124	8.90361	9.3144
Afap1l1	6.93119	6.92483	6.14997	6.79676	6.37119	6.43592	6.76214	6.79724	6.12295	6.2098	5.85417	6.20517
Afap1l2	6.45974	6.45275	6.14997	6.21816	6.31866	6.41746	5.65564	6.06619	5.89773	5.68539	5.69046	5.84239
Afdn	11.9511	11.8789	11.953	11.9246	12.0397	11.9618	11.7552	11.5821	11.5215	11.4655	11.2282	11.5023
Aff1	9.52738	9.40711	9.58195	9.52844	9.66564	9.62508	9.74304	9.54882	9.52315	9.57766	9.32045	9.67162
Aff3	9.80869	9.6548	9.46179	9.55138	9.5643	9.56919	9.85721	9.43555	9.41786	9.53678	8.98392	9.40755
Aff4	12.1622	12.0129	11.9754	11.9387	12.188	12.0279	12.0249	11.8397	11.9679	12.0149	11.7944	11.8109
Afg1l	7.8344	7.9839	7.73938	7.91321	7.90765	7.93997	8.13371	8.01652	8.11771	8.06682	7.92314	7.98794
Afg3l2	11.1173	11.0546	11.0936	10.9715	11.0277	11.0206	11.0807	11.0302	10.8278	10.7945	10.5651	10.6751
Afmid	7.76515	7.64334	8.10843	7.86239	7.8301	7.85925	7.54823	7.85272	7.76558	7.55928	7.72907	7.62314
Aftph	9.85157	9.73055	9.81906	9.87456	9.79008	9.82468	9.95598	9.98408	9.89687	9.93928	9.96949	9.91438
Aga	9.36103	9.40249	9.51106	9.40596	9.3001	9.42309	9.41541	9.5027	9.58994	9.88172	10.0174	10.105
Agap1	10.1023	9.97744	9.9351	9.90089	10.136	10.039	9.93762	9.9168	9.7507	9.73771	9.40051	9.76835
Agap2	5.05844	5.05844	5.05844	5.6381	5.28462	5.29994	5.30369	5.69457	5.31474	5.05844	5.34289	5.41247
Agap3	10.446	10.5028	10.5034	10.5357	10.377	10.4343	10.32	10.2514	10.0223	9.86366	9.63597	9.86837
Agbl3	7.08798	6.72889	6.79575	7.21146	7.15558	7.23854	7.24806	6.87512	7.45326	7.47242	7.85041	7.5124
Agbl5	7.69223	7.61075	7.3606	7.58276	7.71943	7.53989	7.81915	7.5524	7.36964	7.4268	7.257	7.35517
Ager	5.57734	5.50745	5.64353	5.87287	5.50944	5.47576	5.70274	5.64805	5.42043	5.31606	5.7497	5.55788
Agfg1	11.3123	11.2219	11.2466	11.2573	11.4352	11.2988	11.4823	11.4564	11.5578	11.6514	11.5486	11.5564
Agfg2	8.69763	8.97962	8.60092	8.80324	8.35187	8.27242	8.79917	8.84919	8.49984	8.46037	8.21991	8.14236
Aggf1	10.5769	10.5168	10.4688	10.4844	10.4303	10.4556	10.5371	10.5274	10.2852	10.1624	9.69154	9.92641
Agk	9.5941	9.60131	9.71592	9.58597	9.70454	9.65558	9.61725	9.68222	9.5998	9.59768	9.68471	9.60018
Agl	10.8355	10.6898	10.6643	10.7782	10.9821	10.89	10.8244	10.7176	10.6835	10.528	10.2934	10.4595
Ago1	10.051	10.0546	9.89521	10.0886	10.1424	10.1055	9.97827	9.74217	9.62318	9.70304	9.49469	9.66445
Ago2	12.8416	12.6305	12.4984	12.4847	12.6172	12.4482	12.6569	12.3381	12.2154	12.3534	11.9617	12.423
Ago3	8.45205	8.35718	8.10843	8.16143	8.23351	8.1717	8.06675	7.98962	7.8148	8.15701	8.14134	8.23822
Agpat1	11.6049	11.5325	11.4217	11.67	11.5776	11.5163	11.4533	11.4912	11.196	11.163	10.8465	11.0012
Agpat2	9.28426	9.33364	9.42018	9.39234	9.37532	9.19492	9.41132	9.40176	9.35404	9.52219	9.68471	9.60018
Agpat3	11.8471	11.7283	11.8223	11.8562	11.8708	11.9361	11.7047	11.712	11.5922	11.5423	11.4279	11.4755
Agpat4	8.70674	8.54224	8.48843	8.71812	8.69211	8.804	8.52624	8.78569	8.71204	8.68398	8.8758	8.57125
Agpat5	10.9372	10.8712	10.8285	10.735	10.8388	10.8678	10.9131	10.902	10.9967	11.1041	11.1487	11.0752
Agps	11.3795	11.2866	11.2921	11.3446	11.4823	11.4284	11.4403	11.4679	11.6444	11.71	11.6687	11.5467
Agrn	10.9864	10.9197	10.7828	10.785	10.8127	10.7845	10.5869	10.4844	10.332	10.2772	10.2292	10.1734
Agt	7.8231	8.17744	7.73167	7.77943	8.10427	8.17644	8.33488	8.53252	8.14522	7.87352	8.06523	7.9405
Agtpbp1	8.10928	7.87943	7.96581	8.00441	7.99533	7.93997	7.9047	7.69405	7.63814	7.62496	7.54507	7.69707
Agtrap	8.48782	8.63637	8.5715	8.60403	8.38446	8.49665	8.59682	8.66304	8.6788	8.50373	8.58784	8.70716
Ahctf1	11.6317	11.5005	11.4281	11.4538	11.6143	11.494	11.4607	11.3387	11.2369	11.2298	11.0019	11.1158
Ahcy	12.9431	12.8795	12.8837	12.9685	12.9066	12.8978	12.8365	12.8217	12.7694	12.8019	12.8332	12.7497
Ahcyl1	12.0448	12.0095	11.8667	11.8658	12.0761	11.9164	12.0589	11.945	11.9969	11.9453	11.7157	11.7598
Ahcyl2	10.6191	10.4422	10.5275	10.5567	10.6162	10.4264	10.4856	10.3452	10.4357	10.3754	10.0724	10.3644
Ahdc1	9.68105	9.62533	9.68699	9.61474	9.55329	9.60437	9.21145	9.05286	8.94091	9.15951	8.64085	9.06747
Ahi1	10.37	10.3299	10.1296	10.136	10.262	10.1214	10.2207	10.1934	9.98367	9.97642	9.89849	9.75829
Ahnak	8.13673	8.11585	8.56725	8.22938	8.91815	8.48529	7.85031	7.4517	8.08965	8.6027	8.28828	8.88788
Ahnak2	9.33394	9.04652	9.04116	8.88078	8.9058	8.61245	8.8727	8.67311	8.46552	8.85734	8.85966	9.03998
Ahr	8.29915	8.33287	8.17744	8.21605	8.11731	8.06832	8.19762	7.88237	8.12878	8.01944	7.74707	7.94652
Ahrr	6.64367	6.16562	6.54978	6.34213	6.57287	6.25657	6.54483	6.28101	6.43458	6.48191	6.66043	6.73681
Ahsa1	12.1031	12.1968	12.1965	12.1611	12.035	12.1372	12.2574	12.3228	12.3254	12.3004	12.4903	12.4214
AI182371	5.2915	5.31837	5.42999	5.05844	5.44941	5.05844	5.05844	5.05844	5.05844	5.31606	5.34289	5.30909
AI314180	12.0338	11.8567	11.828	11.9179	12.051	11.8896	12.1305	12.0392	12.057	12.023	11.6762	11.7644
AI429214	6.55548	6.36573	6.23304	6.53687	6.31866	6.63621	6.49233	6.56052	6.69145	6.83895	6.9208	6.8382
AI464131	6.95326	6.96592	6.85757	6.91987	7.05512	7.13082	6.71887	6.96014	6.58844	6.76329	6.68104	6.8382
AI597479	9.92592	9.922	9.93674	9.84061	9.97696	9.89311	9.79421	9.89699	10.0992	10.0274	10.4356	10.2896
AI837181	8.8258	8.93535	9.01028	9.06415	9.02474	8.99162	8.8727	8.84327	8.72657	8.89352	8.79747	8.81507
AI846148	9.31031	9.30168	9.20824	9.3627	9.28685	9.37498	9.22084	9.32535	9.24764	9.21765	9.38654	9.40325
Aida	10.1617	10.0457	10.1296	10.1487	10.1837	10.2457	10.4442	10.5116	10.623	10.665	11.0209	10.8828
Aif1l	8.86969	9.06424	8.70129	8.81792	8.65119	8.86641	8.78018	8.96287	8.62161	8.52493	8.70105	8.78221
Aifm1	10.5155	10.5211	10.6722	10.6809	10.4809	10.6564	10.4768	10.5735	10.5599	10.2698	10.3606	10.2896
Aifm2	8.15474	8.13856	8.09063	8.22938	8.46447	8.20454	8.48372	8.29144	8.35257	8.51225	8.4378	8.40804
Aig1	7.43161	7.31715	7.24367	7.37753	6.94604	7.38935	7.52498	7.39418	7.49755	7.58428	7.3075	7.308
Aim2	5.38768	5.05844	5.69851	5.58818	5.37799	5.05844	5.40487	5.05844	5.62858	5.6315	5.85417	5.4915
Aimp1	10.8527	10.9026	11.0774	11.0335	11.0602	11.0496	11.0774	11.2434	11.4057	11.5078	11.8549	11.7888
Aimp2	9.88524	10.0561	10.0606	10.1464	10.1518	10.1214	10.1077	10.2312	10.4672	10.6363	10.9945	10.8805
Aip	10.1835	10.3103	10.2739	10.3197	10.2318	10.1514	10.261	10.3093	10.332	10.4814	10.7155	10.6151
Aipl1	5.67111	5.57622	5.74887	5.46969	5.60969	5.85036	5.48222	5.40042	5.42043	5.50349	5.54955	5.30909
Ajuba	11.3183	11.3407	11.2447	11.4111	11.5162	11.3887	11.2475	11.2185	11.0693	10.9711	10.9083	10.8166
Ak1	8.93568	9.05836	8.90671	8.70869	9.06969	9.02584	8.49544	8.37645	8.14522	7.91309	8.12099	8.36412
AK157302	5.57734	5.05844	5.05844	5.3946	5.28462	5.47576	5.5472	5.30054	5.05844	5.4223	5.05844	5.30909
Ak2	11.6066	11.7283	11.7644	11.8309	11.675	11.7875	11.8374	11.8694	11.8827	11.8071	11.911	12.0201
Ak3	11.1369	10.9682	10.9847	11.0134	11.235	11.0438	11.2238	11.316	11.2185	11.2838	11.1312	11.1046
Ak4	8.49838	8.50798	8.39539	8.46133	8.35918	8.59496	8.59682	8.61505	8.25018	8.21057	8.6782	8.64997
Ak5	6.7256	6.60831	6.14997	6.3803	5.86428	5.91745	5.99303	6.4018	6.15082	6.00652	6.17037	6.20517
Ak6	11.3969	11.5256	11.4327	11.4756	11.4184	11.4865	11.6346	11.742	11.7427	11.8631	12.1158	12.1345
Ak8	5.38768	5.05844	5.51288	5.29641	5.28462	5.39957	5.40487	5.5973	5.73133	5.6315	5.54955	5.05844
Akap1	10.9901	10.9532	10.9462	11.031	10.9284	10.9445	10.948	10.7208	10.7758	10.763	10.8698	10.737
Akap10	10.064	9.91553	10.0455	10.1172	9.96989	10.0222	9.94471	10.0381	10.1322	10.0037	10.2354	10.1089
Akap11	10.6263	10.5274	10.3047	10.2187	10.4414	10.4391	10.467	10.3556	10.1985	10.2585	10.0777	10.1089
Akap12	10.6985	10.6119	10.2117	10.3268	10.3671	10.2255	10.051	9.9961	9.35637	9.07049	9.06701	9.45403
Akap13	9.16848	9.09329	8.94969	8.7337	8.87824	8.72274	8.72165	8.44095	8.0953	8.20002	7.99973	8.67169
Akap2	12.4118	12.0903	12.2894	12.3518	12.4453	12.3391	12.1224	11.9823	12.0702	11.9402	11.7118	12.1012
Akap5	5.85645	5.74071	5.42999	5.53278	5.6937	5.29994	5.82586	5.73772	5.62858	5.4223	5.34289	5.71672
Akap6	7.91636	7.69081	7.50509	7.67807	7.98586	8.1185	7.42775	7.58193	7.0201	7.13749	7.36801	7.50413
Akap7	8.91751	8.84932	9.22714	9.13139	9.24636	9.04906	9.04415	9.26026	9.34937	9.5837	9.58063	9.62439
Akap8	11.8243	11.7733	11.7124	11.7635	11.7384	11.7538	11.7105	11.6415	11.5451	11.37	11.2977	11.3695
Akap8l	9.13745	9.23812	9.09807	9.08369	8.94495	8.9836	9.12399	9.00061	8.94091	8.92246	9.06701	9.04828
Akap9	10.6054	10.492	10.2279	10.2979	10.549	10.2524	10.4798	10.1403	10.0001	10.0508	10.0083	9.95016
Akip1	9.31229	9.30912	9.26161	9.28053	9.27732	9.38716	9.39689	9.37946	9.33054	9.50957	9.36959	9.52699
Akirin1	9.9503	9.87272	9.97233	9.81752	10.0615	10.0518	10.0471	10.2447	10.1828	10.3835	10.5787	10.4574
Akirin2	9.98177	9.98828	9.9351	9.81168	9.93882	9.93099	9.76405	9.91399	9.91434	9.85704	9.84029	9.8448
Akna	8.81742	8.69837	8.68177	8.94098	8.99709	8.79791	8.42359	8.38877	8.34313	8.34577	8.21353	8.54793
Akr1a1	13.3393	13.3551	13.398	13.3321	13.2473	13.294	13.4259	13.4704	13.3752	13.3713	13.4533	13.4204
Akr1b10	8.91228	8.98273	9.17801	8.9754	8.95457	9.05161	9.47547	9.50083	9.76653	9.7341	9.97696	9.94426
Akr1b3	11.9053	12.0053	12.1612	12.1765	11.9943	12.1933	12.1949	12.279	12.3596	12.5126	12.9279	12.8126
Akr1b8	9.96675	9.94125	10.1453	10.1886	10.1888	10.2601	10.1315	9.96925	10.0598	10.0696	10.2829	10.1683
Akr1e1	9.14416	9.25364	9.17523	9.26566	9.15971	9.21329	9.32904	9.41178	9.50018	9.69377	9.80714	9.71907
Akr7a5	9.21167	8.98893	9.27465	9.18887	9.17006	9.19492	9.17807	9.24912	9.17557	9.05607	9.28472	8.98338
Akt1	14.5097	14.4957	14.4275	14.4081	14.4215	14.4352	14.4657	14.4687	14.2537	14.1904	14.1001	14.2004
Akt1s1	11.2939	11.3981	11.5139	11.5842	11.4153	11.4542	11.2971	11.3523	11.2607	11.3519	11.0923	11.2347
Akt2	11.613	11.5399	11.4176	11.5111	11.7297	11.5492	11.4779	11.5257	11.4607	11.3418	11.2368	11.349
Akt3	9.04012	8.95449	8.65399	8.70869	8.77059	8.70982	8.84557	8.91283	8.80394	8.81336	8.75445	8.62421
Aktip	8.96125	8.99202	9.06239	8.93561	9.03158	8.97285	8.76738	8.75125	8.84443	9.14868	9.33799	9.18501
Alad	9.28829	9.58099	9.62122	9.53022	9.52941	9.67226	9.44174	9.58821	9.69296	9.98707	9.90634	9.99937
Alas1	9.78177	9.69128	9.93182	9.90637	9.84139	9.86873	9.62257	9.53972	9.8096	9.68445	9.88664	9.82727
Alcam	9.34562	9.1552	8.94969	8.77643	8.88329	8.99428	8.9483	8.77014	8.55389	8.64198	8.4755	8.40371
Aldh16a1	9.99169	9.92845	10.0963	10.1243	10.1084	10.1104	10.0111	10.1487	10.0839	10.0753	9.79874	9.68761
Aldh18a1	11.2109	11.2113	11.1997	11.286	11.3686	11.3755	11.0852	11.0673	10.9582	10.8236	10.7989	10.9739
Aldh1a1	5.46124	5.31837	5.05844	5.05844	5.86428	5.69301	5.05844	5.30054	5.05844	5.05844	6.20292	6.27676
Aldh1a3	8.04789	8.05741	7.66025	7.58979	7.55425	7.52481	7.66593	7.4517	7.08133	6.7788	7.09263	7.05435
Aldh1a7	5.05844	5.05844	5.05844	5.29641	5.28462	5.29994	5.30369	5.40042	5.05844	5.31606	5.54955	5.30909
Aldh1b1	6.25815	6.19301	6.35748	6.74379	6.45326	6.79336	6.47425	6.32288	6.06449	6.35483	6.70129	6.52152
Aldh1l1	10.2584	10.3165	10.3098	10.3501	10.1949	10.2334	10.4251	10.4045	10.4335	10.266	9.9973	10.0177
Aldh1l2	10.0687	10.0649	10.2609	10.1406	10.5178	10.5532	9.84513	9.72461	9.81299	9.65228	9.86868	9.94426
Aldh2	12.0302	12.275	12.068	11.9992	11.6271	11.7632	11.9742	12.0318	11.5194	11.5581	11.5009	11.4988
Aldh3a2	9.26389	9.13019	9.19458	9.09817	9.28114	9.20872	9.13894	9.31042	9.23503	9.09891	9.21365	8.89711
Aldh3b1	8.04789	7.84511	7.79218	7.9729	7.58639	7.44679	7.8001	7.78514	7.51487	7.3306	7.37979	7.3365
Aldh4a1	9.91684	9.98828	9.82438	9.87736	9.98166	9.8745	9.87959	9.96109	9.90007	9.94085	9.83824	9.78661
Aldh5a1	8.53985	8.39993	8.49292	8.39605	8.31852	8.35396	8.21196	8.36817	8.13976	8.20531	7.77364	8.0225
Aldh6a1	7.98872	7.85894	7.52323	7.83919	7.87715	7.50956	8.01845	8.18689	7.92113	7.93246	7.86691	7.79429
Aldh7a1	9.62314	9.60735	9.53725	9.60465	9.43141	9.46774	9.51797	9.55787	9.48323	9.38376	9.51795	9.38591
Aldh9a1	11.3861	11.4239	11.4767	11.4562	11.3842	11.5154	11.5306	11.5781	11.6511	11.6652	12.026	11.7002
Aldoa	15.0717	15.0957	15.1456	15.1811	15.2527	15.2891	15.2002	15.2606	15.2572	15.2614	15.3869	15.2868
Aldoc	8.33895	8.52521	8.28023	8.14274	8.18488	8.18116	8.95113	8.71922	8.47848	8.64585	8.8798	8.70365
Alg1	9.443	9.52888	9.42486	9.43093	9.56274	9.5974	9.60297	9.51018	9.67443	9.78035	9.73185	9.65001
Alg11	9.0639	8.83217	8.85197	8.86673	9.08727	9.00487	8.93978	9.09581	9.22487	9.44473	9.64069	9.52303
Alg12	8.05751	8.08694	8.15482	8.21158	8.14728	8.30733	8.25875	8.39285	8.36195	8.6381	8.51222	8.59798
Alg14	9.77172	9.64308	9.63139	9.45172	9.58762	9.69365	9.65408	9.8299	9.71125	9.83361	9.81133	9.82727
Alg2	10.6207	10.5506	10.6232	10.718	10.676	10.6846	10.7863	10.7256	10.9589	10.9703	11.0209	10.731
Alg3	8.9149	8.72838	8.75828	8.85255	8.74584	8.71952	8.85769	8.60104	8.92527	8.83721	8.40467	8.65361
Alg5	10.3393	10.216	10.4274	10.3176	10.3518	10.2221	10.419	10.6457	10.8568	11.0118	11.2894	11.1711
Alg6	9.83512	9.68368	9.83672	9.905	10.0559	9.9002	10.0084	9.9154	10.3555	10.403	10.5663	10.4942
Alg8	9.28628	9.39784	9.24845	9.30152	9.27923	9.24266	9.2601	9.34222	9.39539	9.2331	9.23566	9.25116
Alg9	9.7789	9.85083	9.84373	9.81168	9.84268	9.91847	9.94046	9.83734	9.78909	9.83698	9.80295	9.72597
Alkbh1	8.76316	8.89299	8.99458	8.9221	8.82149	8.6935	8.76416	9.04514	9.17028	9.3297	9.56086	9.49906
Alkbh2	7.67337	7.82409	7.8069	7.63803	7.56074	7.62698	7.74134	8.09425	8.01393	8.12944	8.4755	8.29088
Alkbh3	9.29031	9.19324	9.33315	9.37264	9.29065	9.44267	9.39896	9.60751	9.60568	9.71591	10.162	9.98507
Alkbh4	7.47625	7.26482	7.65207	7.59679	7.67848	7.49414	7.60099	7.77883	7.63814	7.95787	7.96196	8.05622
Alkbh5	12.1373	12.1163	12.1193	12.2274	12.379	12.2185	12.224	12.1386	12.153	12.1042	11.6842	11.8804
Alkbh6	8.51234	8.74315	8.97871	8.77041	8.65415	8.77329	8.73157	8.82232	8.66377	8.92881	9.04935	9.29131
Alkbh7	8.8258	9.30168	9.37732	9.48327	9.37711	9.4543	9.56847	9.60402	9.94093	10.1462	10.3972	10.5133
Alkbh8	9.92074	9.82342	9.93182	9.95875	10.0492	10.0274	9.94612	9.95973	10.0484	10.0993	10.196	10.2315
Alms1	10.0391	9.7813	9.73866	9.88986	10.0769	9.91007	10.0719	9.83437	9.90643	9.80465	9.64069	9.80464
Alox5ap	5.62626	5.69093	5.32153	5.68385	5.44941	5.6466	5.74643	5.54096	5.77688	5.50349	5.34289	5.30909
Alox8	5.2915	5.05844	5.42999	5.3946	5.28462	5.39957	5.5472	5.40042	5.05844	5.31606	5.05844	5.30909
Aloxe3	5.46124	5.05844	5.64353	5.46969	5.50944	5.05844	5.74643	5.30054	5.50121	5.05844	5.05844	5.05844
Alpk1	6.60043	6.85316	6.62554	6.95452	6.46895	6.63621	6.76214	6.99487	6.87386	6.6312	7.00182	7.06597
Als2	11.4696	11.3126	11.2689	11.2854	11.3895	11.2641	11.3272	11.2077	11.1221	10.9557	10.6827	10.7823
Als2cl	7.01723	6.67873	7.17521	6.77057	6.58696	6.41746	6.99364	6.62439	6.75539	6.74756	6.35112	6.67474
Alx1	9.26389	9.37203	9.29783	9.35067	9.19864	9.33571	9.30496	9.42371	9.40217	9.43586	9.75159	9.78826
Alx4	5.2915	5.69093	5.32153	5.05844	5.73157	5.29994	5.30369	5.05844	5.05844	5.05844	5.46007	5.30909
Alyref	11.9722	12.1327	12.1731	12.2574	12.1186	12.1838	12.1336	12.195	12.3826	12.3201	12.4951	12.2876
Alyref2	6.23767	6.36573	6.60707	6.21816	6.14201	6.27813	5.99303	5.98139	6.27898	6.44121	6.5963	6.59218
Amacr	8.62894	8.30312	8.55011	8.44244	8.4337	8.49287	8.37358	8.53621	8.77977	8.77506	8.89176	8.80856
Ambra1	10.4763	10.3408	10.3533	10.4188	10.5497	10.4007	10.3576	10.2603	10.1295	10.1877	9.76244	10.2132
Amd1	12.1567	12.095	11.9095	11.9688	12.0887	12.0405	12.2875	12.3761	12.2611	12.3201	12.4814	12.4068
Amd2	6.37294	6.3428	6.42548	6.36139	6.60087	6.29924	6.15697	6.30217	6.72385	6.15623	6.81602	6.29952
Amdhd1	6.00343	6.01473	5.83924	6.12569	5.86428	5.69301	5.78732	5.77812	6.0018	6.03859	6.06516	5.98165
Amdhd2	9.67027	9.73791	9.75918	9.77469	9.66418	9.8542	9.87366	9.71494	9.91118	9.8719	9.77536	9.7932
Amer1	7.44666	7.2541	7.54114	7.31875	7.57362	7.56219	7.65887	7.72728	7.59828	7.70285	7.29505	7.45343
Amfr	12.38	12.2941	12.3533	12.3593	12.3746	12.3157	12.4584	12.4928	12.552	12.5566	12.454	12.2856
Amh	5.71273	5.74071	5.42999	5.3946	5.56216	5.69301	5.70274	5.73772	5.56905	5.68539	5.85417	5.61614
Amhr2	5.05844	5.31837	5.58246	5.46969	5.56216	5.29994	5.40487	5.40042	5.31474	5.05844	5.46007	5.30909
Amigo1	5.9479	6.19301	6.20615	6.17307	5.94986	6.14086	5.8972	6.01062	5.6822	5.4223	5.85417	5.94911
Amigo3	6.42587	6.1083	6.2592	6.32251	6.64162	6.47193	6.27422	6.4018	6.06449	6.52115	6.63945	6.62592
Ammecr1	8.70674	8.6482	8.83089	8.87237	8.77875	8.85766	8.58956	8.7449	8.89348	8.77152	8.4158	8.68598
Ammecr1l	10.0235	10.0765	9.85244	9.93481	10.0492	10.0607	9.98241	9.97196	9.8248	9.75741	9.70285	9.81923
Amn	5.2915	5.31837	5.58246	5.68385	5.65326	5.6466	5.40487	5.54096	5.31474	5.50349	5.62462	5.84239
Amn1	7.51235	7.69081	7.89895	7.83919	7.67848	7.77982	7.68691	7.70076	8.25018	8.22104	8.71908	8.79874
Amot	8.18133	8.06337	8.00445	7.90208	7.68441	7.83529	8.09289	7.79142	7.72194	7.68762	7.56565	7.82741
Amotl1	12.5469	12.3392	12.1872	12.1677	12.4645	12.2645	12.252	12.1437	11.8554	11.8101	11.5784	11.8318
Amotl2	10.7621	10.73	10.6985	10.5852	10.5121	10.6131	10.4817	10.4431	10.0951	10.2332	9.99546	10.2387
Ampd1	5.57734	5.50745	5.51288	5.46969	5.37799	5.29994	5.40487	5.69457	5.05844	5.31606	5.62462	5.30909
Ampd2	10.9907	10.8887	10.8408	10.7909	10.6912	10.8185	10.7479	10.6642	10.4672	10.3961	10.2708	10.4851
Ampd3	7.11714	7.11808	7.45864	7.54703	7.41746	7.634	6.79014	6.54398	6.78611	7.26934	6.95384	7.23898
Amt	5.88818	5.90932	5.42999	5.80351	5.76728	5.77636	5.74643	5.64805	5.8195	5.93837	5.98726	5.87968
Amz1	6.39088	6.3428	6.30953	6.02268	6.37119	6.41746	6.07883	6.28101	6.15082	6.2098	6.43069	6.70618
Amz2	9.69479	9.70449	9.70635	9.71502	9.66272	9.69038	9.79578	9.81941	9.57803	9.65036	9.50507	9.73796
Anapc1	12.6872	12.5107	12.4485	12.4992	12.6155	12.4302	12.4442	12.3509	12.2707	12.2349	11.9598	12.1757
Anapc10	7.85674	7.89293	8.19418	7.84503	7.97632	8.16695	8.22616	8.1389	8.39884	8.57047	9.02426	9.10508
Anapc11	10.2747	10.6069	10.5416	10.4899	10.3436	10.3846	10.4251	10.4835	10.5996	10.7198	11.0082	11.1767
Anapc13	8.94083	9.34816	9.41312	9.16157	8.70645	9.06686	9.10381	9.08582	9.17557	9.3745	9.62412	9.7932
Anapc15	9.07798	9.17163	9.21366	8.9221	8.96888	9.05417	9.11141	9.2424	8.91897	9.18887	9.43078	9.50107
Anapc16	10.0439	10.4207	10.3398	10.1998	10.1776	10.2623	10.2323	10.4294	10.3956	10.5751	10.9354	11.065
Anapc2	10.5051	10.3505	10.4134	10.5637	10.521	10.5159	10.3891	10.4625	10.3956	10.3847	10.1422	10.1194
Anapc4	11.1442	11.19	11.1334	11.2055	11.2785	11.2115	11.1552	11.1268	11.2761	11.2539	11.2992	11.2915
Anapc5	13.1611	13.0475	13.0076	13.053	13.1516	13.0404	12.8629	12.8642	12.6984	12.6151	12.6335	12.5788
Anapc7	11.0091	11.1725	11.1798	11.2259	11.1411	11.2195	11.2039	11.2777	11.3285	11.1974	11.3308	11.1597
Angel1	7.56817	7.32737	7.3606	7.28395	7.48759	7.27561	7.34095	7.66687	7.23873	7.36992	7.07793	7.269
Angel2	9.72338	9.65868	9.68114	9.79848	9.82971	9.80517	9.75278	9.67059	9.93472	9.8353	9.88862	9.76333
Angpt1	5.2915	5.31837	5.05844	5.05844	5.37799	5.05844	5.65564	5.88668	5.56905	5.68539	5.94538	5.80306
Angpt2	9.62792	9.69507	9.65548	9.55488	9.6671	9.55307	9.24637	9.29318	9.16498	9.05607	9.20092	9.06474
Angpt4	5.2915	5.74071	5.51288	5.29641	5.05844	5.47576	5.05844	5.05844	5.42043	5.4223	5.46007	5.61614
Angptl2	11.3629	11.2225	10.9125	10.9432	10.7377	10.8073	10.9697	10.8863	10.6316	10.3696	10.2753	10.3743
Angptl6	6.49259	6.47343	6.67924	6.75725	6.48441	6.57335	6.49233	6.57683	6.43458	6.74756	6.66043	6.59218
Ank	8.96378	8.67157	8.66198	8.7337	8.84498	8.55573	8.92258	8.57975	8.53748	8.508	8.21353	8.34164
Ank1	5.2915	5.42554	5.64353	5.53278	5.28462	5.53977	5.30369	5.40042	5.31474	5.50349	5.05844	5.71672
Ank2	10.2727	10.1854	10.2491	10.0861	10.3912	10.2289	10.0191	9.96925	9.70943	9.80293	9.47898	9.90378
Ank3	6.45974	5.90932	5.91939	6.21816	5.97642	6.27813	6.10564	6.28101	5.93397	6.15623	5.98726	5.87968
Ankdd1b	5.52305	5.42554	5.42999	5.6381	5.37799	5.53977	5.65564	5.64805	5.42043	5.4223	5.62462	5.66863
Ankef1	5.2915	5.50745	5.64353	5.53278	5.60969	5.05844	5.48222	5.4768	5.42043	5.6315	5.46007	5.4915
Ankfn1	10.9146	10.8271	10.7167	10.7102	10.8265	10.6871	10.8541	10.6566	10.5106	10.4943	10.1603	10.4154
Ankfy1	10.9833	10.8737	10.9599	10.9722	11.2714	11.0966	11.2285	11.1479	11.2172	11.1823	10.9853	11.0637
Ankhd1	10.9139	10.8944	10.7719	10.8673	10.884	10.8415	10.8698	10.6337	10.5344	10.5579	10.2166	10.5103
Ankib1	11.1624	11.048	10.9918	10.917	11.0474	11.0685	11.1225	11.0431	11.007	10.9954	10.7442	10.8836
Ankle1	7.74728	7.93916	7.82147	7.47262	7.45997	7.53989	7.73466	7.70076	7.84892	7.8802	8.0365	7.85335
Ankle2	9.80869	9.74341	9.58822	9.66252	9.95683	9.84394	9.82989	9.6639	9.87433	9.8719	9.95064	9.66625
Ankmy1	5.05844	5.42554	5.05844	5.3946	5.37799	5.39957	5.30369	5.30054	5.62858	5.73475	5.34289	5.30909
Ankmy2	9.33784	9.22244	9.34061	9.29106	9.24245	9.31885	9.39274	9.25136	9.35637	9.40664	9.30864	9.37497
Ankra2	7.81741	7.9839	8.05434	7.91875	7.81406	7.77352	7.76121	7.95106	7.86233	7.82589	8.17462	8.11067
Ankrd10	9.66563	9.58915	9.63341	9.3587	9.45358	9.40324	9.28046	9.42569	9.45092	9.79255	9.84029	9.68761
Ankrd11	12.506	12.4239	12.3192	12.3747	12.3557	12.2642	12.1716	11.98	11.7307	11.8131	11.4469	11.7905
Ankrd12	9.32611	9.12458	8.97231	8.88914	8.95696	8.98628	9.17565	8.98724	9.11629	8.74294	8.80592	9.11301
Ankrd13a	11.153	11.1165	10.9623	11.1871	11.1748	11.1259	11.1607	10.998	10.9288	10.9244	10.615	10.7506
Ankrd13b	9.92722	9.86937	9.83848	9.77769	9.66125	9.78232	9.51034	9.51018	9.11354	9.2254	9.18161	9.4394
Ankrd13c	10.8431	10.7807	10.8702	10.818	10.8821	10.9824	10.9065	10.9287	10.9854	10.9471	10.9908	10.9081
Ankrd13d	5.71273	6.27074	5.99197	5.76604	5.76728	5.91745	5.82586	5.73772	6.0018	5.73475	5.85417	5.87968
Ankrd16	7.47625	7.89963	7.89208	7.736	7.61156	7.56954	7.74134	7.61084	7.86233	7.91309	8.2822	8.20366
Ankrd17	11.8708	11.7503	11.5662	11.6222	11.7429	11.6639	11.6258	11.486	11.2656	11.2869	10.9181	11.3248
Ankrd2	7.02758	7.08171	7.26572	7.47262	7.3358	7.35538	7.16871	7.61084	7.15115	7.09037	7.48138	7.6826
Ankrd23	6.68535	6.77701	6.79575	6.59989	6.91456	6.88359	6.52761	6.67005	6.83078	7.11415	7.40304	7.00674
Ankrd24	7.21875	7.1765	7.52323	7.22075	7.19877	7.30274	7.21887	7.31637	7.23873	7.45436	7.85041	7.57678
Ankrd26	9.82405	9.74158	9.78853	9.64129	9.65685	9.54946	9.66099	9.38558	9.44656	9.54505	9.03147	9.38591
Ankrd27	10.1683	10.2305	10.1594	10.3661	10.4035	10.2678	10.1178	10.1136	10.1416	10.228	10.4234	10.2423
Ankrd28	11.0524	10.8561	10.759	10.9518	11.0795	10.9231	11.0309	11.0112	11.1132	11.1468	11.1068	10.9819
Ankrd29	7.30472	7.3968	7.31927	7.36929	7.61778	7.68884	7.34989	7.46769	7.582	7.50784	7.71998	7.5369
Ankrd34a	8.18571	8.02725	7.83588	7.69765	7.70785	7.64097	7.86868	7.95664	7.50624	7.3306	7.28249	7.37359
Ankrd37	5.85645	5.83006	6.14997	5.68385	5.60969	5.81435	5.93046	5.73772	6.03372	6.00652	5.7497	5.80306
Ankrd39	8.21601	8.538	8.64192	8.44624	8.22552	8.50041	8.31291	8.63925	8.62161	8.49516	9.04935	8.91236
Ankrd40	11.4571	11.4504	11.3343	11.38	11.3583	11.309	11.3407	11.3559	11.0565	11.1111	11.0236	11.1667
Ankrd42	6.25815	6.53325	6.38064	6.3803	6.51469	6.57335	6.5618	6.47521	6.53322	6.26054	5.94538	6.25348
Ankrd44	8.51234	8.26761	7.91935	8.09001	8.25721	7.97318	8.25875	8.36817	7.959	7.95787	7.72907	7.64574
Ankrd46	9.88257	9.79548	9.87825	9.77918	9.94365	9.87162	9.8677	9.95015	9.88081	9.83867	9.70735	9.79975
Ankrd49	8.9434	8.95449	8.96266	9.12904	9.07851	9.13111	9.13148	9.14235	9.43118	9.57766	10.03	9.83048
Ankrd50	10.9758	10.9532	10.6242	10.6404	10.7921	10.6936	10.9116	10.5921	10.4169	10.3438	10.0863	10.2662
Ankrd52	11.9085	11.855	11.573	11.5684	11.547	11.443	11.5674	11.4192	10.9877	11.1118	10.6411	11.0582
Ankrd53	5.05844	5.05844	5.32153	5.58818	5.44941	5.59597	5.60425	5.4768	5.05844	5.05844	5.80393	5.4915
Ankrd54	9.25153	9.26388	9.14429	9.22448	9.36995	9.33151	9.23714	9.18274	9.15162	9.15951	8.94624	9.07561
Ankrd6	5.9479	6.29534	6.28468	5.90522	6.00214	6.27813	6.37903	6.06619	6.0942	5.78053	5.05844	5.94911
Ankrd61	5.46124	5.05844	5.32153	5.3946	5.44941	5.39957	5.30369	5.05844	5.42043	5.05844	5.34289	5.71672
Ankrd9	7.79443	7.9649	7.73167	7.89086	7.97632	7.90595	7.72794	7.91141	7.959	7.77655	7.69234	7.80098
Anks1	9.89849	9.79548	9.86454	9.91455	9.71728	9.75754	9.83906	9.60053	9.52729	9.47967	9.05997	9.45403
Anks1b	5.2915	5.05844	5.32153	5.3946	5.05844	5.29994	5.30369	5.05844	5.42043	5.57167	5.05844	5.05844
Anks3	8.31919	8.64427	8.45655	8.46133	8.20128	8.3456	8.37782	8.44489	8.37589	8.40652	8.59763	8.44643
Anks6	6.77721	7.15345	7.13958	7.28395	7.19025	7.07871	6.83096	6.83681	6.80118	6.54026	6.52834	6.67474
Ankzf1	7.71697	7.59416	7.75467	7.96224	7.77588	7.74802	7.62298	7.74035	7.94649	7.8802	7.79107	7.85335
Anln	12.4721	12.3608	12.2619	12.351	12.4997	12.4448	12.3143	12.3861	12.4169	12.3816	12.1513	12.072
Ano1	6.00343	6.41013	6.05865	5.99487	5.97642	5.97916	5.74643	5.88668	5.8195	6.00652	6.02711	6.01294
Ano10	9.66563	9.34816	9.46861	9.43283	9.66418	9.46965	9.39689	9.39369	9.27745	9.34163	9.15216	9.14689
Ano2	5.46124	5.57622	5.05844	5.29641	5.05844	5.29994	5.05844	5.40042	5.31474	5.57167	5.05844	5.05844
Ano3	9.3895	9.05836	8.92339	9.03183	8.96888	9.05926	9.23018	9.33802	9.08851	9.15139	9.33216	9.1648
Ano6	10.9758	10.8071	10.8259	10.8652	11.0756	10.87	10.8229	10.6882	10.7299	10.6517	10.2693	10.5428
Ano8	9.7204	9.73975	9.79396	9.87036	9.84268	9.93238	9.43772	9.47048	9.44656	9.43808	9.42806	9.42675
Anp32a	11.5644	11.743	11.6863	11.6672	11.2497	11.5617	11.6293	11.5795	11.3255	11.2349	11.0965	11.1961
Anp32b	13.2478	13.3113	13.352	13.3118	13.2217	13.269	13.3203	13.3353	13.1184	13.0457	12.9575	13.0332
Anp32e	13.147	13.2718	13.189	13.1411	12.9233	13.0833	13.1749	13.1344	12.8624	12.7442	12.4749	12.6182
Anpep	6.27821	6.27074	6.71371	6.41712	6.35398	6.71025	6.13167	6.03886	6.39245	6.03859	5.90115	6.42632
Antxr1	9.98425	10.0233	9.91363	9.92674	9.99914	9.89737	9.80204	9.68553	9.57203	9.53885	9.40329	9.47877
Antxr2	10.0391	9.88933	9.87655	9.79995	9.97461	9.99862	9.8542	9.74058	9.49596	9.5837	9.59284	9.62624
Anxa1	11.538	11.6409	12.3069	12.2432	12.521	12.6671	11.1448	11.2793	11.9193	12.1188	12.6607	12.6412
Anxa11	10.5326	10.3384	10.4379	10.4538	10.5362	10.3896	10.4169	10.3945	10.1034	10.2229	9.88466	10.0688
Anxa2	11.4612	11.523	11.6262	11.5978	11.6681	11.769	11.3064	11.3636	11.4896	11.465	11.8869	11.7917
Anxa4	9.42661	9.56865	10.1899	10.074	10.0176	10.0683	9.56663	9.60751	10.3058	10.3091	10.3491	10.1402
Anxa5	12.9531	13.0539	12.9973	12.9116	12.8929	12.9746	12.8098	12.835	12.6383	12.61	12.7043	12.7542
Anxa6	9.98798	9.99903	10.1509	10.0042	10.1632	10.2153	9.71344	9.71817	9.47469	9.54917	9.44433	9.57173
Anxa7	9.84062	9.87606	9.95949	9.90363	10.0581	10.0543	10.0232	10.1463	10.147	10.3151	10.5688	10.3332
Anxa9	6.94228	6.80804	7.02634	7.07399	6.89313	6.75253	6.74789	6.99487	6.94246	7.07832	6.66043	6.9446
Aoc2	6.62944	6.79263	6.66162	6.56882	6.43735	6.5894	6.94582	6.63981	6.51419	6.73163	6.40483	6.78131
Aoc3	5.62626	5.50745	5.64353	5.29641	5.80115	5.05844	5.30369	5.5973	5.56905	5.73475	5.69046	5.05844
Aox1	7.58853	7.35757	7.42997	7.48025	7.52798	7.61285	7.36759	7.26184	7.32081	7.4268	7.40304	7.34587
Ap1ar	10.5206	10.5754	10.5045	10.4426	10.4389	10.2863	10.523	10.5727	10.479	10.3847	10.2555	10.2507
Ap1b1	11.5253	11.4972	11.4879	11.5757	11.5596	11.5483	11.492	11.3662	11.3904	11.385	10.9732	11.1559
Ap1g1	11.4227	11.394	11.2728	11.4312	11.4347	11.3174	11.3986	11.3775	11.3808	11.3694	10.9769	11.1217
Ap1g2	8.29511	8.35718	8.55011	8.31933	8.45769	8.24566	8.53005	8.47983	8.43922	8.26723	8.12781	8.38185
Ap1m1	10.6985	10.8063	10.7928	10.7968	10.7293	10.7706	10.7316	10.8247	10.799	10.8621	10.9526	10.8501
Ap1s1	11.5615	11.6345	11.6628	11.7003	11.5411	11.6709	11.5756	11.6924	11.632	11.6171	11.8211	11.7593
Ap1s2	9.67336	9.54156	9.35049	9.2763	9.28685	9.53129	9.85119	9.9706	9.89528	10.0436	9.79028	9.84797
Ap1s3	7.10749	7.1765	6.77978	6.85986	6.95636	7.05726	7.16871	7.30744	7.30077	7.10232	7.04803	7.10023
Ap2a1	12.0123	11.915	11.9465	11.9377	11.9803	11.9268	11.8347	11.7554	11.6301	11.5869	11.1838	11.5545
Ap2a2	11.1673	11.088	11.2119	11.1933	11.2994	11.288	11.168	11.0899	10.8988	10.9275	10.7583	10.7922
Ap2b1	12.2827	12.1003	12.1626	12.2827	12.4	12.2551	12.2002	12.0777	12.0383	11.9669	11.5942	11.8524
Ap2m1	12.9125	12.9931	13.0359	13.1604	12.9487	13.0288	12.9369	12.9685	12.9369	12.9163	12.9489	13.0027
Ap2s1	11.1042	11.2708	11.3663	11.2232	11.1109	11.2172	11.2372	11.281	11.2557	11.2426	11.4853	11.4538
Ap3b1	11.3349	11.3145	11.3244	11.3971	11.3856	11.4027	11.3009	11.3319	11.3566	11.3046	11.0092	11.0061
Ap3d1	12.3104	12.2572	12.1616	12.3452	12.4135	12.2535	12.2488	12.1787	12.1308	12.0944	11.6961	11.9939
Ap3m1	10.977	10.9148	10.8591	10.8056	10.894	10.9126	11.0729	10.9987	10.9459	10.9322	11.0281	10.8619
Ap3m2	8.00375	7.94564	7.73938	7.88521	7.82477	7.72203	8.16357	8.16789	8.15066	8.00126	8.24516	7.94652
Ap3s1	10.2293	10.3177	10.086	10.091	10.1507	10.2221	10.3839	10.4768	10.332	10.5538	10.8063	10.7112
Ap3s2	10.6127	10.6465	10.6673	10.6576	10.6169	10.5702	10.6394	10.6592	10.6899	10.7443	10.9015	10.8109
Ap4b1	8.8005	8.75048	9.09218	9.07151	8.8553	8.98628	9.01741	9.03479	9.14084	8.96942	9.32339	9.02884
Ap4e1	9.1794	9.03459	8.88302	8.94098	9.15971	9.12869	9.08591	9.13994	9.0487	8.97557	8.92314	8.96595
Ap4m1	8.54325	8.72838	8.61334	8.63757	8.60599	8.38694	8.53762	8.47599	8.27027	8.47787	8.44325	8.5082
Ap4s1	8.67922	8.873	8.94316	8.8554	8.62122	8.77329	8.96799	9.12294	9.11078	9.19151	9.37526	9.37497
Ap5b1	7.77694	7.80275	7.93945	7.78553	8.12163	7.98408	7.88681	7.88237	7.77272	7.72538	7.6736	7.64574
Ap5m1	8.94083	8.9127	8.84498	8.82084	8.92795	8.92899	9.17807	9.20136	9.17293	9.12953	9.36675	9.27727
Ap5s1	7.80597	7.58578	7.93278	7.736	7.87715	7.73508	7.72118	7.48349	7.57379	7.51655	7.76484	7.73258
Ap5z1	9.06861	9.09329	9.08923	9.05428	9.05635	9.03103	8.77699	8.89575	8.92842	8.59871	8.68738	8.73147
Apaf1	10.8369	10.5672	10.4413	10.5303	10.6078	10.5433	10.5521	10.4431	10.1697	10.1943	9.77107	10.0823
Apba1	5.88818	5.78687	5.69851	5.46969	5.60969	5.53977	5.70274	5.8162	5.62858	5.4223	5.34289	5.41247
Apba3	9.32414	9.68748	9.76842	9.83631	9.83491	9.76533	9.56847	9.60053	9.56198	9.52428	9.55588	9.65725
Apbb1	6.15107	6.19301	6.14997	6.23993	6.26327	6.45408	6.05118	6.03886	6.27898	6.3771	6.37832	5.91518
Apbb1ip	5.67111	5.57622	5.8804	5.68385	5.50944	5.77636	5.70274	5.5973	5.93397	5.50349	5.80393	5.61614
Apbb2	8.81742	8.83561	8.96589	8.80029	9.14299	8.87221	8.85164	8.51392	8.59808	8.80301	8.45947	8.72802
Apc	11.5536	11.3114	11.2287	11.221	11.4711	11.281	11.2435	10.9474	10.8868	10.7647	10.6516	10.9513
Apc2	5.71273	5.57622	5.51288	5.58818	5.56216	5.59597	5.65564	5.64805	5.05844	5.6315	5.62462	5.76132
Apeh	10.0427	9.88603	9.93674	10.0482	10.0095	9.93652	10.0178	10.0838	10.0397	9.95952	9.84642	9.82245
Apex1	10.9237	11.0196	11.114	11.2237	11.01	11.061	10.9642	11.1371	10.9589	10.9471	10.9816	10.9081
Apex2	7.93219	7.72914	7.5588	7.69765	7.61156	7.71545	7.85646	7.36875	7.82855	7.34054	7.89932	7.69707
Aph1a	12.0637	12.0186	12.0817	12.1178	11.9441	12.0074	11.9547	11.902	11.8339	11.7851	11.6802	11.7535
Aph1b	8.24147	8.0693	8.0482	8.11422	8.13451	8.03209	8.24487	8.27381	8.02585	8.08418	8.13459	8.29088
Aph1c	10.9139	10.703	10.9462	10.767	10.7915	10.8304	11.0813	11.1869	11.4922	11.5495	11.6802	11.5761
Api5	12.2436	12.1021	12.0435	12.1404	12.2532	12.2289	12.1913	12.2506	12.2592	12.2391	12.252	12.2071
Apip	9.10574	9.23552	9.26945	9.23761	9.30386	9.27143	9.28942	9.53422	9.79081	9.91876	10.3053	10.3732
Aplf	9.31427	9.23031	9.38696	9.44984	9.27923	9.30607	9.30937	9.15196	9.07725	9.17026	9.13553	9.18501
Apln	6.42587	6.59001	6.14997	6.0757	5.97642	6.00832	6.15697	6.11843	5.77688	6.28495	5.7497	5.87968
Aplp2	13.0708	12.951	12.883	12.8684	12.852	12.8424	12.7824	12.7684	12.4437	12.3999	12.1899	12.3416
Apmap	9.50327	9.47921	9.53941	9.58768	9.492	9.54041	9.40721	9.47622	9.45527	9.4314	9.5383	9.58318
Apoa2	5.97614	6.01473	5.74887	5.87287	5.80115	6.00832	5.8624	6.01062	6.0018	6.1834	6.2344	5.91518
Apobec1	6.23767	6.36573	6.42548	6.56882	6.61462	6.60521	7.41932	7.13526	7.55722	7.55928	7.74707	7.71849
Apobec2	5.46124	5.31837	5.64353	5.68385	5.28462	5.05844	5.48222	5.40042	5.31474	5.4223	5.34289	5.41247
Apobec3	5.05844	5.42554	5.58246	5.29641	5.05844	5.59597	5.05844	5.05844	5.56905	5.50349	5.46007	5.41247
Apobr	5.71273	6.29534	6.35748	6.23993	6.09781	6.23452	5.8624	5.77812	6.25467	6.00652	5.85417	5.66863
Apod	5.85645	5.50745	5.64353	5.83903	5.37799	5.59597	5.60425	5.88668	6.0018	5.68539	5.05844	5.4915
Apoe	14.164	14.2852	14.2906	14.2602	14.0031	14.086	14.1995	14.2316	14.1604	14.1662	14.1334	14.0854
Apol10b	5.05844	5.05844	5.32153	5.05844	5.05844	5.05844	5.99303	5.98139	6.20416	6.03859	6.61808	6.42632
Apol8	5.57734	5.05844	5.58246	5.29641	5.05844	5.53977	5.40487	5.30054	5.05844	5.50349	5.62462	5.05844
Apol9a	5.62626	5.42554	5.32153	5.53278	5.05844	5.6466	8.00748	7.92285	8.34786	8.17868	8.82267	8.59419
Apol9b	5.38768	5.05844	5.32153	5.68385	5.37799	5.39957	8.15864	7.89987	8.2802	8.24689	8.72355	8.60928
Apold1	10.9133	10.8552	10.8513	10.773	10.9107	10.8554	10.7871	10.8653	10.9412	11.0148	11.1536	10.9898
Apom	5.38768	5.42554	5.05844	5.76604	5.37799	5.59597	5.40487	5.05844	5.05844	5.50349	5.34289	5.05844
Apoo	9.3202	9.46818	9.51326	9.29734	9.20671	9.53677	9.50458	9.75795	9.73469	10.0274	10.3691	10.4657
Apool	7.25382	7.32737	7.64385	7.60375	7.48759	7.76719	7.56352	7.85272	7.77982	8.15701	8.14134	8.06176
Apopt1	9.72933	9.95078	10.0257	10.0569	9.82448	9.85566	9.88697	9.87111	10.1697	10.3284	10.7343	10.7748
App	12.389	12.3771	12.4573	12.4651	12.4161	12.429	12.5778	12.4862	12.4955	12.4208	12.345	12.3541
Appbp2	11.7445	11.5058	11.4466	11.4107	11.6818	11.6229	11.5928	11.6097	11.7248	11.6442	11.7185	11.6063
Appl1	9.09885	9.14968	9.05333	8.815	9.17828	9.11654	9.02817	9.05286	9.19132	9.19415	9.21997	9.23914
Appl2	9.91944	9.96339	9.9611	9.76265	9.63762	9.68381	9.73652	9.8164	9.75599	9.65036	9.65007	9.73967
Aprt	10.752	10.9666	11.0383	10.8085	10.7068	10.9161	10.6359	10.7159	10.7064	10.9012	11.2149	11.1723
Aptx	8.81461	8.92569	8.76571	8.75828	8.68634	8.83703	9.00929	9.04772	8.94091	9.11847	9.43893	9.37717
Aqp1	6.12811	5.94603	5.95651	6.36139	6.00214	6.06377	5.96236	5.77812	5.93397	5.68539	5.34289	5.66863
Aqp11	6.52448	6.53325	6.23304	6.3025	6.31866	6.25657	7.00532	6.84971	6.58844	6.52115	6.50473	6.65869
Aqp4	6.02985	5.83006	5.64353	5.83903	5.8939	6.09022	5.82586	5.69457	5.62858	5.73475	5.80393	5.55788
Aqp5	5.88818	5.05844	5.51288	5.46969	5.44941	5.47576	5.30369	5.05844	5.50121	5.57167	5.54955	5.05844
Aqr	11.2466	11.0502	11.1617	11.0833	11.0679	11.0425	11.0402	10.8784	10.5996	10.8337	10.3288	10.7077
Araf	10.3108	10.4756	10.4528	10.4024	10.4876	10.4205	10.6218	10.6166	10.5518	10.6593	10.731	10.712
Arap1	9.35527	9.35776	9.43882	9.53377	9.36815	9.43292	9.23945	9.12538	9.0107	8.88701	8.95005	9.16226
Arap2	9.68718	9.65674	9.39175	9.53377	9.5422	9.3503	9.70009	9.40176	9.44656	9.46449	9.34956	9.21724
Arap3	6.81451	6.80804	7.03943	6.8475	7.01654	6.99065	6.84427	6.36309	6.49482	6.55904	6.06516	6.07223
Arcn1	12.6007	12.4616	12.4895	12.5802	12.6287	12.5947	12.6288	12.6459	12.7683	12.7347	12.6572	12.6387
Arel1	10.2093	10.2967	10.1367	10.0569	10.1371	10.0858	10.4311	10.3071	10.2075	10.1678	9.98068	10.1971
Arf1	13.134	13.3245	13.4054	13.3718	13.1938	13.2843	13.2339	13.2086	13.3425	13.3454	13.4687	13.4701
Arf2	10.1114	10.1123	9.99924	9.95081	9.99682	10.0454	10.1876	10.2278	10.1815	10.2139	10.3648	10.3677
Arf3	12.4253	12.4056	12.2791	12.3984	12.4361	12.3544	12.5089	12.4327	12.2704	12.2995	11.9706	12.2576
Arf4	12.1426	12.095	12.053	12.0437	12.1371	12.1035	12.2761	12.3571	12.4753	12.5751	12.745	12.6309
Arf5	11.1917	11.312	11.5561	11.6134	11.5053	11.4992	11.3625	11.4296	11.6382	11.7591	11.819	11.7146
Arf6	11.8934	12.0261	12.145	12.228	12.1337	12.1106	11.9526	11.9266	11.9995	11.9992	11.6785	11.7847
Arfgap1	10.3499	10.3813	10.4146	10.4594	10.4269	10.3488	10.3491	10.2592	10.3854	10.1678	10.1669	10.2399
Arfgap2	11.263	11.1874	11.3356	11.2027	11.2492	11.1891	11.2115	11.2978	11.3243	11.4441	11.5323	11.4277
Arfgap3	8.99876	8.97338	9.0258	8.98323	9.05635	9.20414	9.11393	8.93807	9.26758	9.17826	9.31751	9.06474
Arfgef1	11.5219	11.3046	11.2754	11.2828	11.5995	11.443	11.4393	11.3176	11.3432	11.2527	11.2046	11.2515
Arfgef2	10.9487	10.8202	10.7062	10.7427	10.923	10.7283	10.8082	10.6303	10.4991	10.358	10.1944	10.4553
Arfgef3	10.7232	10.4612	10.08	9.96138	9.94365	9.74025	10.6103	10.1037	9.65188	9.70304	9.28773	9.58508
Arfip1	10.9034	10.8097	10.7991	10.7373	10.8625	10.9273	10.9167	10.961	11.0507	10.9916	11.0046	10.8469
Arfip2	10.6413	10.8106	10.7014	10.7997	10.668	10.6755	10.826	10.8389	10.7539	10.8083	10.8758	10.7632
Arfrp1	9.09654	9.13019	9.19732	9.04932	9.14089	9.14793	9.26919	9.28665	9.27745	9.52219	9.6265	9.46026
Arg2	5.05844	5.42554	5.32153	5.29641	5.05844	5.47576	5.40487	5.54096	5.50121	5.50349	5.34289	5.55788
Arglu1	10.2429	10.3263	10.2076	10.4312	10.2831	10.2634	10.2598	10.2735	10.2974	10.3103	10.1976	10.1582
Arhgap1	10.8189	10.9302	10.7356	10.6921	10.7335	10.643	10.7085	10.7119	10.4379	10.4543	10.1701	10.36
Arhgap10	9.84611	9.799	9.91363	9.92809	9.88718	9.76533	9.87663	9.86383	9.75423	9.69563	9.4171	9.49502
Arhgap11a	11.3884	11.4021	11.3118	11.3932	11.3055	11.2564	11.2481	11.1569	11.01	10.9795	10.8496	10.9638
Arhgap12	9.29031	9.39085	9.18632	9.30775	9.30574	9.4132	9.46761	9.41577	9.45744	9.45574	9.56335	9.54856
Arhgap15	5.2915	5.05844	5.32153	5.05844	5.28462	5.05844	5.30369	5.54096	5.31474	5.31606	5.46007	5.61614
Arhgap17	9.22859	9.12176	9.39414	9.38646	9.37711	9.23143	9.09361	9.03219	9.14624	8.95082	8.73687	9.05928
Arhgap18	9.63744	9.57483	9.57564	9.47036	9.48041	9.50732	9.67982	9.72942	9.60958	9.65801	9.59284	9.52303
Arhgap19	10.7321	10.6229	10.5523	10.548	10.6146	10.6183	10.6619	10.5529	10.4959	10.4911	10.3068	10.3885
Arhgap20	5.82326	5.69093	5.64353	5.76604	5.44941	5.39957	5.40487	5.5973	5.50121	5.50349	5.46007	5.41247
Arhgap21	11.609	11.5112	11.2715	11.2823	11.4971	11.3169	11.4104	11.2606	10.9582	10.8488	10.6528	11.0906
Arhgap23	10.165	10.1334	10.0696	10.0825	9.95563	9.84394	9.98516	9.83883	9.584	9.61938	9.40606	9.6823
Arhgap26	7.34569	7.30685	7.41052	7.31875	7.44595	7.37247	7.16871	7.15556	6.96888	6.96436	7.23101	7.269
Arhgap27	8.70067	8.79368	8.81666	8.6209	8.81093	8.83999	8.39463	8.4251	8.13976	8.23661	8.05811	8.31879
Arhgap28	7.60193	7.54313	7.66025	7.76716	7.9473	7.88279	7.50132	7.67372	7.27011	7.72538	7.61578	7.57678
Arhgap29	10.2125	10.1222	10.1123	10.1101	10.1999	10.092	10.2089	10.2153	10.3118	10.1049	10.1538	10.0206
Arhgap30	11.7649	11.6938	11.7228	11.7453	11.7549	11.753	11.6611	11.6097	11.5583	11.3706	11.1692	11.3145
Arhgap31	11.4535	11.2574	11.1935	11.2352	11.297	11.0049	11.3535	11.125	10.9335	10.9228	10.6138	10.9306
Arhgap32	9.79032	9.59322	9.4272	9.29734	9.50185	9.23818	9.58673	9.18742	8.95637	9.02085	8.78042	8.828
Arhgap33	5.71273	5.50745	5.91939	5.29641	5.6937	5.77636	5.5472	5.77812	5.50121	5.31606	5.34289	5.61614
Arhgap35	12.1356	11.9486	11.8205	11.9165	11.9929	11.8374	11.7672	11.6859	11.4023	11.4661	11.1462	11.458
Arhgap39	10.5232	10.5232	10.4654	10.5143	10.3336	10.3795	10.42	10.247	10.2114	10.1244	9.76461	10.1234
Arhgap4	5.05844	5.42554	5.51288	5.05844	5.37799	5.29994	5.05844	5.05844	5.56905	5.4223	5.05844	5.4915
Arhgap42	9.0473	8.82525	8.86585	8.8411	9.04064	8.95656	8.82101	8.80412	8.89027	8.91927	8.66431	8.90323
Arhgap45	5.38768	5.42554	5.79556	5.80351	5.92239	6.00832	5.78732	5.4768	5.89773	5.57167	5.90115	5.80306
Arhgap5	11.2435	11.075	11.0105	10.8129	11.0059	11.0147	11.2348	11.3128	11.4051	11.4622	11.4522	11.34
Arhgap6	8.08599	8.02725	8.08465	7.9729	8.189	8.11356	8.23555	7.99504	8.14522	8.14605	8.0365	7.99956
Arhgap8	5.2915	5.42554	5.32153	5.05844	5.44941	5.29994	5.05844	5.30054	5.05844	5.05844	5.69046	5.41247
Arhgap9	8.90702	9.19324	9.11848	9.29734	9.26771	9.23593	9.17323	9.09581	9.24513	9.07622	9.42533	9.47672
Arhgdia	14.5977	14.5871	14.6185	14.6456	14.6446	14.6353	14.5115	14.5	14.3494	14.2978	14.0737	14.2445
Arhgdib	12.5542	12.6884	13.1355	13.0963	13.1191	13.2891	12.8049	12.8911	13.3175	13.4003	14.0206	13.9621
Arhgdig	5.05844	5.63658	5.69851	5.6381	5.65326	5.39957	5.40487	5.64805	5.50121	5.31606	5.46007	5.05844
Arhgef1	11.1308	11.1382	11.218	10.9807	11.0882	11.0444	10.8382	10.7248	10.5528	10.6697	10.3944	10.5496
Arhgef10	9.05918	9.07593	9.14713	9.01666	9.10249	8.94008	8.71499	8.77638	8.63324	8.6027	8.49135	8.73834
Arhgef10l	10.2283	10.2627	10.2104	10.2121	10.4191	10.3977	9.92906	9.88411	9.73826	9.60165	9.64304	9.81923
Arhgef11	10.9907	10.8787	10.817	10.8539	10.7467	10.6148	10.8336	10.7376	10.5679	10.5311	10.2213	10.4154
Arhgef12	12.306	12.1345	12.0324	12.0564	12.2513	12.0656	12.1603	11.9733	11.8048	11.8502	11.5499	11.8598
Arhgef15	5.46124	5.57622	5.42999	5.58818	5.65326	5.59597	5.40487	5.40042	5.42043	5.4223	5.46007	5.05844
Arhgef16	5.52305	5.05844	5.8804	5.87287	5.80115	5.39957	5.48222	5.64805	5.8195	5.68539	5.46007	5.66863
Arhgef17	10.8902	10.8071	10.6927	10.7864	10.9351	10.8148	10.6227	10.5014	10.1537	10.1174	9.84029	10.2826
Arhgef18	10.1562	10.0809	9.92853	9.97318	10.0481	9.91147	10.1586	9.99876	9.97915	9.93142	9.60977	9.82084
Arhgef19	7.42403	7.42548	7.20989	7.30146	7.61156	7.50956	6.8039	7.22419	6.87386	6.71548	6.5963	7.04261
Arhgef2	12.1151	12.0488	12.1197	12.1086	12.2013	12.1099	11.9838	11.9937	11.931	11.8593	11.7532	11.8105
Arhgef25	8.31521	8.74315	8.68177	8.49837	8.34821	8.33718	8.22616	8.35985	8.17221	8.45596	8.36502	8.30024
Arhgef28	5.71273	5.42554	5.69851	5.93625	5.83342	5.85036	5.30369	5.64805	5.31474	5.73475	5.34289	5.76132
Arhgef37	6.55548	6.27074	6.53001	6.50397	6.31866	6.50678	6.65858	6.86248	6.58844	6.74756	7.03281	6.78131
Arhgef39	8.42645	8.32302	8.26975	8.38816	8.1972	8.19056	8.30403	8.32178	8.32886	8.45596	8.38215	8.47971
Arhgef4	6.57066	6.66153	6.79575	6.85986	6.90389	6.88359	6.22902	6.36309	6.57033	6.2355	6.79764	6.62592
Arhgef40	8.87239	8.62843	9.71974	9.69456	10.0503	10.0157	8.15369	8.40907	9.07442	8.84731	8.92314	9.27019
Arhgef5	6.7256	6.64406	6.33379	6.6596	6.31866	6.39866	6.76214	6.71398	6.53322	6.6825	6.26489	6.57493
Arhgef6	5.2915	5.31837	5.05844	5.46969	5.28462	5.29994	5.30369	5.05844	5.05844	5.05844	5.05844	5.30909
Arhgef7	10.1954	10.2408	10.2687	10.3309	10.2239	10.2874	10.1039	10.0185	9.97311	9.8437	9.76461	10.0661
Arhgef9	6.75168	6.62632	6.64372	6.74379	6.73149	6.50678	6.67394	6.72827	6.77085	6.46175	6.72119	6.62592
Arid1a	12.1222	12.1021	11.9178	12.0287	11.9859	11.8214	11.8664	11.5183	11.2198	11.3965	10.9853	11.5003
Arid1b	10.9714	10.8391	10.7627	10.7595	10.9549	10.7837	10.8128	10.6448	10.6742	10.6857	10.2447	10.6207
Arid2	11.1246	10.9891	10.9735	10.9897	11.0423	10.9943	10.9181	10.8187	10.711	10.6612	10.3691	10.6012
Arid3a	8.42645	8.27785	8.5715	8.42714	8.54341	8.4271	8.33051	8.25595	8.27524	8.24176	8.07233	8.14236
Arid3b	6.62944	6.53325	6.74721	6.9081	6.91456	6.72451	6.67394	6.77013	6.47511	6.54026	6.68104	6.72159
Arid4a	9.55611	9.42548	9.30038	9.33243	9.31136	9.19261	9.36125	9.13025	9.12452	9.12677	8.74129	8.86297
Arid4b	9.10802	9.07302	8.93331	8.90296	8.97599	8.95929	9.19961	9.0983	8.99282	8.9725	8.8185	8.88479
Arid5a	8.21601	8.27274	8.38574	8.2382	8.35553	8.27242	8.49544	8.43305	8.64859	8.57047	8.2638	8.46317
Arid5b	8.67922	8.62444	8.64998	8.6108	8.61818	8.72916	8.71165	8.50642	8.17221	8.14053	8.05094	8.20865
Arih1	11.4731	11.4521	11.4722	11.4131	11.5675	11.5514	11.5452	11.5732	11.5436	11.4999	11.3767	11.3231
Arih2	10.2869	10.2754	10.3607	10.414	10.3262	10.355	10.3156	10.3608	10.4607	10.3638	10.1187	10.2303
Arl1	11.4305	11.4754	11.5438	11.5236	11.4715	11.6948	11.6968	11.8371	12.0947	12.3475	12.7343	12.6767
Arl10	8.8118	9.00431	8.67784	8.8554	8.85015	8.75454	8.98466	8.85215	8.88057	8.90967	8.83923	8.79874
Arl11	7.98872	7.8862	8.06046	7.91875	8.01409	8.15259	7.94558	7.83461	8.04354	8.24176	8.4966	8.50012
Arl13b	8.30318	8.00884	8.39539	8.22496	8.46108	8.46616	8.18313	8.41711	8.20392	8.20531	8.58784	8.116
Arl14ep	9.44661	9.18248	9.56508	9.44608	9.7644	9.56383	9.66958	9.44338	9.75423	9.50957	9.65474	9.57938
Arl15	8.77764	8.70969	8.48392	8.38024	8.44403	8.72595	8.60044	8.86391	8.70472	8.65356	8.60735	8.70716
Arl16	7.74127	7.81702	7.7773	7.77943	7.64847	7.74802	7.81283	7.75973	7.959	7.83966	7.89932	7.82085
Arl2	9.65317	9.94443	9.98347	9.89677	9.6406	9.79455	9.88991	9.97331	10.0498	10.0923	10.1863	10.265
Arl2bp	11.3504	11.3497	11.3055	11.3681	11.2589	11.2514	11.2227	11.2512	11.2363	11.3228	11.3366	11.3389
Arl3	9.48229	9.71572	9.69864	9.6898	9.50675	9.5674	9.71842	9.79972	9.8079	9.72503	10.0425	10.0428
Arl4a	7.28797	7.1765	7.26572	7.40194	7.19877	6.9442	7.29532	7.49911	7.48881	7.81197	8.14134	7.91
Arl4d	5.75169	5.98111	6.14997	5.76604	5.86428	5.85036	5.60425	5.8523	6.0942	5.86371	5.80393	5.98165
Arl5a	11.5422	11.3255	11.2741	11.205	11.4785	11.4498	11.3778	11.4477	11.4736	11.4325	11.5685	11.5227
Arl5b	9.56612	9.23292	9.27983	9.28053	9.52458	9.53312	9.54063	9.50832	9.52935	9.71774	9.60254	9.4225
Arl5c	5.2915	5.31837	5.05844	5.58818	5.05844	5.6466	5.05844	5.30054	5.31474	5.05844	5.54955	5.66863
Arl6	8.61286	8.58804	8.59258	8.49104	8.47793	8.47384	8.63966	8.96013	9.12452	9.19678	9.57325	9.41398
Arl6ip1	12.6188	12.542	12.4482	12.4805	12.5503	12.4829	12.7629	12.8191	12.826	12.8404	13.1719	13.0071
Arl6ip4	10.5334	10.4433	10.5144	10.5214	10.7356	10.4623	10.6067	10.7296	10.7504	10.872	11.1846	11.1379
Arl6ip5	10.0699	10.0837	10.4379	10.3741	10.5647	10.5251	10.3035	10.4882	10.6825	10.9626	11.351	11.3891
Arl6ip6	9.90244	9.79018	9.79757	9.67542	9.61208	9.68381	9.80048	9.78593	10.012	10.1091	10.2738	10.1746
Arl8a	10.463	10.729	10.5777	10.4255	10.2079	10.4235	10.3933	10.3178	10.1172	10.0406	10.0759	10.3127
Arl8b	11.9232	11.8651	11.9683	12.0567	12.0925	12.0986	12.0198	12.0469	12.2342	12.3697	12.5818	12.4375
Armc1	10.9314	10.882	10.7617	10.7857	10.9424	10.9245	11.0501	11.2197	11.2191	11.3246	11.6921	11.5148
Armc10	9.50327	9.49668	9.61509	9.67703	9.57368	9.65893	9.69673	9.75324	9.74538	9.78384	10.1538	10.0715
Armc2	7.30472	7.2541	7.64385	7.79763	7.46693	7.50188	7.35877	7.37728	7.48001	7.79082	7.645	7.68985
Armc5	10.0101	10.0308	10.0257	9.92674	9.99334	9.91708	9.79421	9.78285	9.48323	9.67318	9.44972	9.61327
Armc6	8.8005	8.86627	8.95943	8.90571	8.91322	8.95656	8.78654	8.90432	9.03129	8.99082	9.09481	9.05928
Armc7	7.29637	7.28601	7.34009	7.33581	7.40298	6.9792	7.31376	7.31637	7.06932	7.06615	7.10715	7.19785
Armc8	9.4998	9.4726	9.5587	9.56705	9.63165	9.66394	9.48913	9.69703	9.67256	9.88009	9.85253	9.82406
Armc9	8.50188	8.26246	8.31628	8.22496	8.20535	8.09363	8.26334	8.35148	8.27524	8.55408	8.39346	8.43799
Armcx1	8.39286	8.20456	8.01709	7.94066	7.95704	7.81091	8.01298	8.03242	8.11771	7.68762	7.71083	7.60786
Armcx2	10.5453	10.3564	10.5534	10.4566	10.5338	10.4642	10.4392	10.5265	10.6336	10.6178	10.634	10.5747
Armcx3	8.84242	8.61241	8.83795	8.8411	8.75414	8.8161	8.88755	8.80107	8.81756	8.98779	9.0024	8.93941
Armcx4	8.57017	8.33776	8.06655	8.00441	7.64239	7.70221	8.09806	7.83461	7.42596	7.49025	7.24407	7.40073
Armcx5	7.20983	7.30685	7.10294	7.40998	7.19877	7.31166	7.21887	7.22419	6.92904	7.18294	7.19102	7.17678
Armt1	9.30832	9.1552	9.32063	9.20233	9.32253	9.21329	9.2138	9.39369	9.45744	9.36985	9.40883	9.30981
Arnt	10.5786	10.5168	10.5913	10.603	10.5631	10.5861	10.7001	10.7176	10.6853	10.506	10.3404	10.4718
Arnt2	6.40852	6.29534	6.2592	6.32251	6.30054	6.66639	6.22902	6.14345	6.06449	5.97316	5.69046	5.80306
Arntl	8.05751	7.71394	7.97233	7.8156	7.87715	7.84732	7.7743	7.8101	7.36002	7.49025	7.26981	7.73958
Arntl2	5.82326	6.13741	6.02597	6.17307	6.24409	6.31991	6.33839	6.30217	5.93397	6.26054	6.06516	6.34354
Arpc1a	11.0018	11.2414	11.1956	11.1775	11.2389	11.2475	11.2932	11.3724	11.5158	11.697	11.9313	12.032
Arpc1b	12.2955	12.491	12.5969	12.5385	12.4011	12.587	12.3827	12.4147	12.5406	12.553	12.7464	12.69
Arpc2	12.2539	12.4217	12.3764	12.4683	12.3444	12.337	12.2497	12.2705	12.2589	12.2903	12.1652	12.2484
Arpc3	11.435	11.5981	11.6414	11.5431	11.3342	11.5595	11.613	11.7144	11.7172	11.8419	12.164	12.2321
Arpc4	12.2381	12.5626	12.6507	12.7226	12.5746	12.666	12.5661	12.6349	12.7798	12.9073	13.1063	13.1002
Arpc5	12.3183	12.5519	12.5225	12.5688	12.4468	12.6198	12.7013	12.7216	12.8389	12.939	13.1985	13.2323
Arpc5l	10.6006	10.7833	10.6414	10.6921	10.7356	10.786	10.8593	10.928	11.0341	11.1083	11.5176	11.4917
Arpin	9.68259	9.60534	9.74241	9.63305	9.75345	9.77307	9.61547	9.74058	9.68001	9.78384	9.88267	9.89462
Arpp19	11.5838	11.7616	11.6573	11.6967	11.4681	11.6319	11.7724	11.7842	11.8529	11.8651	12.1967	12.254
Arrb1	8.98885	8.8113	8.95295	9.02173	8.9854	8.77018	8.65017	8.72245	8.44364	8.36002	8.28828	8.4295
Arrb2	8.83966	8.7172	8.90671	8.95697	8.93283	8.97014	8.64667	8.62893	8.64859	8.5786	8.69196	8.62421
Arrdc1	7.67337	7.81702	7.85722	7.56858	7.58639	7.67533	8.10321	7.70744	7.77982	7.96415	8.13459	7.72555
Arrdc2	6.44294	6.51367	6.64372	6.50397	6.42119	6.57335	6.35891	6.30217	6.20416	6.57752	6.50473	6.25348
Arrdc3	8.79767	8.65213	8.59675	8.70237	8.76513	8.75139	8.71499	9.01911	9.22487	9.06762	9.11531	8.90323
Arsa	9.89717	9.88768	9.86454	9.80289	9.81398	9.86729	9.84513	9.92101	9.5998	9.48828	9.58063	9.59076
Arsb	11.0921	10.9421	11.0497	11.0153	10.9175	10.8872	10.9842	11.0347	10.8747	10.6574	10.5527	10.5555
Arsg	7.37758	7.42548	7.23251	7.35265	7.3204	7.47855	7.60836	7.63914	7.50624	7.3306	7.6546	7.56097
Arsk	7.2364	7.28601	7.31927	7.24821	7.43888	7.37247	7.4023	7.20495	7.66151	7.77655	8.01455	7.70424
Art1	5.46124	5.78687	5.32153	5.29641	5.65326	5.47576	5.65564	5.8523	5.89773	5.86371	6.13664	5.98165
Art3	6.88584	6.60831	6.62554	6.32251	6.38812	6.14086	6.93357	6.65503	6.12295	6.80925	6.5963	6.32177
Art4	5.85645	5.74071	5.58246	5.83903	5.76728	5.73606	5.82586	5.69457	5.6822	5.57167	5.54955	5.76132
Art5	6.23767	6.27074	6.64372	6.41712	6.75595	6.7386	6.1816	6.47521	6.78611	6.57752	6.79764	6.91884
Artn	5.91862	5.63658	5.51288	5.90522	5.8939	6.11589	5.78732	5.73772	5.50121	5.86371	5.46007	5.87968
Arv1	7.46153	7.66728	7.85722	7.67807	7.53459	7.56219	7.72118	7.62506	7.48881	8.07841	8.06523	8.00533
Arvcf	7.73523	7.9063	7.69245	7.71696	7.7814	7.79234	7.54053	7.46769	7.23873	7.24827	7.13572	7.22882
Arxes1	6.44294	6.59001	6.05865	6.28208	5.8939	6.00832	6.31745	6.4018	6.0942	5.93837	5.85417	5.94911
Asah1	11.1777	11.2891	11.1784	11.1402	11.0002	11.1277	11.3229	11.4345	11.4362	11.4408	11.788	11.7249
Asah2	7.71697	7.58578	7.34009	7.45724	7.49441	7.634	7.81915	7.89406	7.89531	7.89345	7.77364	7.9821
Asap1	11.0134	10.8569	10.8232	10.982	10.7968	10.8312	10.8012	10.7046	10.4758	10.4344	10.1603	10.4605
Asap2	9.28426	9.13858	8.92339	8.87237	8.87824	8.87221	8.81169	8.7062	8.35727	8.41108	8.30636	8.46317
Asap3	6.02985	5.78687	5.99197	5.83903	5.94986	5.94891	5.74643	5.69457	5.73133	6.0695	5.80393	5.94911
Asb1	9.4211	9.25877	9.26684	9.22668	9.36456	9.38514	9.42965	9.59702	9.53963	9.4403	9.12882	9.22702
Asb10	5.78843	6.07822	6.23304	6.0757	6.0513	5.88466	5.93046	5.91954	5.89773	6.2098	5.7497	5.71672
Asb13	7.97861	8.27785	8.06046	8.16606	8.18075	8.20917	8.47979	8.26936	8.41693	8.252	8.39908	8.54793
Asb15	5.71273	5.87076	5.42999	5.96609	5.65326	5.91745	6.10564	6.42063	6.27898	5.73475	6.2344	6.46541
Asb2	6.21675	6.36573	5.79556	6.0757	6.22453	5.77636	6.15697	6.45732	5.9686	5.97316	5.34289	5.91518
Asb3	7.85119	7.85204	7.95927	7.91321	7.90261	8.04254	7.85646	7.82852	8.00793	8.01341	8.11414	7.92838
Asb4	5.67111	5.69093	5.51288	5.3946	5.60969	5.53977	5.93046	5.77812	5.62858	5.78053	5.34289	5.4915
Asb5	5.05844	5.57622	5.69851	5.46969	5.28462	5.39957	5.05844	5.4768	5.42043	5.50349	5.34289	5.61614
Asb6	9.98052	10.0881	10.0024	10.1383	9.96278	9.99465	9.89285	9.87256	9.96855	9.79081	9.74723	9.82567
Asb7	9.03291	9.05245	8.91674	8.90021	9.00173	9.00487	8.9652	8.94914	8.9838	8.96942	8.57304	8.87236
Asb8	9.49631	9.73607	9.67918	9.52844	9.60143	9.74813	9.58128	9.68222	9.68743	9.76804	9.7839	9.89156
Ascc1	8.7248	8.99202	8.98825	8.93022	8.88077	8.91782	8.92258	9.0983	9.01661	9.18623	9.37526	9.18501
Ascc2	10.934	10.8519	10.9199	10.9597	10.9254	10.9231	10.9152	10.812	10.7671	10.7919	10.5823	10.7881
Ascc3	10.414	10.0158	9.99295	10.0789	10.3752	10.2557	10.4098	10.2581	10.4102	10.2722	9.98068	10.1102
Ascl3	5.62626	5.31837	5.32153	5.05844	5.05844	5.05844	5.60425	5.4768	5.05844	5.31606	5.05844	5.41247
Asf1a	9.68259	9.87439	9.88675	9.80876	9.8284	9.85274	10.0111	10.0535	10.3118	10.4041	10.6245	10.5946
Asf1b	10.3795	10.3456	10.4321	10.381	10.1159	10.2787	10.3013	10.3649	10.4258	10.3615	10.3097	10.3365
Ash1l	11.1425	10.8578	10.7328	10.6825	10.7747	10.6472	10.7135	10.3894	10.2581	10.4221	10.046	10.4902
Ash2l	11.97	12.008	11.9695	11.9354	11.9908	11.9685	11.9897	12.0434	12.0666	12.0432	12.1664	12.0274
Asic1	7.25382	7.08171	6.87254	7.08431	7.35858	7.43874	6.99364	6.99487	6.62381	6.89627	6.5963	6.86567
Asic3	5.62626	5.42554	5.42999	5.53278	5.05844	5.47576	5.05844	5.4768	5.05844	5.31606	5.05844	5.55788
Asl	10.0792	10.3017	10.3752	10.3691	10.3545	10.3714	10.3555	10.3178	10.6191	10.6149	10.7409	10.5496
Asna1	11.3634	11.6414	11.6568	11.6583	11.3452	11.5029	11.5637	11.6576	11.7136	11.7994	12.0314	12.0347
Asns	11.4806	11.4967	11.6429	11.6399	11.8084	11.7499	11.3567	11.5053	11.5048	11.493	11.6003	11.4937
Asnsd1	10.9764	10.9517	11.0059	10.9518	11.0985	11.1064	11.0755	11.2406	11.3995	11.5293	11.8169	11.6235
Aspg	6.17348	6.31935	5.91939	6.28208	6.18417	6.00832	5.99303	5.95107	6.22975	5.73475	5.85417	6.18007
Asph	10.7643	10.6562	10.6839	10.6413	10.6101	10.7138	10.8043	10.7945	10.7939	10.6726	10.7177	10.7207
Asphd2	6.92001	7.2433	6.93069	6.91987	7.15558	6.9442	6.76214	7.07238	6.53322	6.5957	6.5963	6.82423
Aspm	11.0158	10.8176	10.8932	10.8708	10.9692	10.8671	10.8336	10.5338	10.4597	10.607	10.2677	10.5823
Aspscr1	10.4965	10.5692	10.5177	10.5911	10.3832	10.3714	10.2633	10.3337	10.4379	10.1824	10.1944	10.1746
Asrgl1	8.45927	8.34751	8.52838	8.36425	8.20535	8.27242	8.41538	8.44489	8.46117	8.31682	8.23889	8.16823
Ass1	10.8445	10.9034	10.681	10.7997	10.9454	10.8822	10.6602	10.6642	10.6075	10.5049	10.8597	10.7241
Aste1	7.66703	7.85204	7.70038	7.85663	7.77588	7.82924	7.75462	7.91714	7.99586	8.23661	8.10726	7.9821
Astl	5.46124	5.42554	5.32153	5.6381	5.05844	5.39957	5.05844	5.54096	5.42043	5.82336	5.69046	5.05844
Asxl1	11.4227	11.3551	11.1603	11.2466	11.2699	11.1289	11.2606	11.0924	10.8932	10.8794	10.5514	10.8844
Asxl2	10.3927	10.3588	10.292	10.3441	10.4052	10.3003	10.4552	10.3082	10.1308	10.1665	9.93347	10.1809
Atad1	10.9442	10.8434	10.6781	10.5303	10.671	10.7025	10.9246	10.914	10.8551	10.8638	11.0433	10.9703
Atad2	12.6469	12.4828	12.478	12.4237	12.4111	12.4192	12.535	12.4573	12.4756	12.4403	12.2992	12.3371
Atad2b	10.1396	9.95236	9.87825	9.96664	10.0659	9.95298	10.0912	9.9787	9.82312	9.71408	9.51538	9.62254
Atad3a	10.5876	10.5978	10.6781	10.6857	10.6527	10.6813	10.5659	10.552	10.5699	10.4477	10.4505	10.481
Atad5	10.3256	10.293	10.1705	10.0156	10.3151	10.1715	10.3608	10.2267	10.0811	10.0624	9.88068	9.87924
Atat1	7.66703	7.92611	7.74705	7.59679	7.63628	7.77352	7.68691	7.66687	7.54885	7.576	7.88321	7.32707
Ate1	10.4851	10.4974	10.4823	10.4669	10.5162	10.5048	10.539	10.6507	10.497	10.2623	10.4028	10.3477
Atf1	10.4269	10.354	10.5221	10.4962	10.4851	10.6404	10.467	10.4701	10.5497	10.6932	10.767	10.7215
Atf1-ps	5.2915	5.31837	5.05844	5.29641	5.44941	5.39957	5.05844	5.05844	5.31474	5.31606	5.34289	5.05844
Atf2	10.0687	10.0809	10.0008	9.92809	10.1329	10.0454	10.1039	10.116	10.1484	10.1571	9.99914	10.1338
Atf3	7.02758	6.96592	7.35039	7.18321	7.65453	7.70221	7.33195	7.15556	7.80788	7.79791	8.15475	8.2576
Atf4	12.2526	12.4738	12.7801	12.6266	12.4908	12.5943	12.2608	12.3061	12.3869	12.4264	12.7529	12.7649
Atf5	10.0827	10.0938	10.1339	10.1125	9.98166	10.0543	9.84967	9.71332	9.2651	9.18887	9.29972	9.4225
Atf6	10.2125	9.95552	9.91197	10.0994	10.2049	10.077	10.2746	10.1841	10.2925	10.1571	10.0282	9.99224
Atf6b	11.66	11.7435	11.865	11.832	11.7834	11.7894	11.7791	11.7189	11.4816	11.4709	11.3949	11.5023
Atf7	10.5146	10.3624	10.1438	10.1965	10.264	10.0403	10.2667	10.0001	9.64047	9.78384	9.36959	9.86993
Atf7ip	10.5198	10.2892	10.3533	10.3186	10.5386	10.1762	10.1278	10.0093	10.147	10.0979	9.69381	10.0275
Atg10	7.24514	6.97933	7.03943	6.9771	6.96659	6.90819	7.14809	7.35152	7.23873	7.44524	7.41452	7.42734
Atg101	9.46278	9.57071	9.67722	9.66898	9.68017	9.59215	9.65927	9.58998	9.68743	9.65036	9.93539	9.80952
Atg12	8.90175	8.93856	8.93331	8.88078	8.87064	8.87511	8.911	9.25804	9.27991	9.4157	9.73406	9.74137
Atg13	9.76015	9.76698	9.67722	9.76718	9.96989	9.74656	9.75116	9.7374	9.65188	9.73951	9.48686	9.49704
Atg14	7.80021	7.77378	7.75467	7.59679	7.71365	7.44679	7.81283	7.93985	7.80788	7.65665	7.43718	7.6606
Atg16l1	9.27003	9.39085	9.37248	9.43283	9.37711	9.3146	9.41541	9.51577	9.52315	9.59966	9.61935	9.48488
Atg16l2	7.30472	7.4901	7.42997	7.79159	7.82477	7.75444	7.32289	7.4517	7.36964	7.7328	7.49221	7.68985
Atg2a	9.31625	9.17706	9.30038	9.34057	9.33729	9.15982	9.2961	8.9241	8.95021	8.92246	8.42134	8.95422
Atg2b	10.5189	10.3311	10.3447	10.2481	10.4423	10.3216	10.3619	10.0763	10.1062	9.97489	9.74723	10.0192
Atg3	10.6748	10.8493	10.8143	10.8813	10.7961	10.8985	10.936	10.9549	11.0428	11.0208	11.1262	11.1698
Atg4a	9.4026	9.59118	9.3749	9.28475	9.2047	9.28886	9.84058	9.89271	9.8415	10.1367	10.3606	10.2507
Atg4a-ps	5.05844	5.05844	5.32153	5.3946	5.05844	5.05844	5.40487	5.54096	5.05844	5.57167	5.54955	5.61614
Atg4b	9.80165	9.86937	9.98505	9.90637	9.86064	9.98401	9.95176	9.9787	9.96551	9.99161	10.0742	10.1207
Atg4c	8.41162	8.2981	8.23786	8.35619	8.46108	8.34979	8.35221	8.45273	8.38051	8.34099	8.37075	8.33254
Atg4d	10.1835	10.2447	10.2117	10.3238	10.5995	10.4823	10.4402	10.5493	10.6844	10.7244	10.8516	10.6911
Atg5	9.45202	9.3744	9.51326	9.55837	9.39485	9.5036	9.65408	9.62828	9.72932	9.98251	10.3404	10.1129
Atg7	9.85293	9.9821	10.1021	10.1089	9.97461	10.0441	9.96159	9.79972	9.96093	9.80637	9.48686	9.88233
Atg9a	10.5309	10.4298	10.3136	10.3471	10.3011	10.2289	10.2078	10.1233	9.64618	9.60758	9.56583	9.61141
Atg9b	5.82326	5.57622	5.58246	5.80351	6.09781	5.85036	5.74643	5.91954	5.42043	5.31606	5.94538	5.76132
Atic	12.6102	12.5739	12.5418	12.6496	12.6072	12.6112	12.5118	12.5099	12.428	12.4222	12.3995	12.3167
Atl1	8.17252	7.97127	7.85722	7.87385	8.01409	7.95668	8.03474	8.00582	8.0953	7.83966	7.86691	7.78757
Atl2	10.2989	10.3189	10.4413	10.4899	10.392	10.4926	10.524	10.5384	10.5878	10.6959	10.7968	10.6946
Atl3	10.9576	10.801	10.8915	10.761	10.9537	10.9642	10.9388	10.9308	10.8932	10.9346	10.7507	10.7198
Atm	10.4048	10.0663	10.047	9.93347	10.0312	9.99862	10.2712	10.1233	10.0134	10.0667	9.78816	10.1518
Atmin	10.0757	9.82342	9.77393	9.95611	9.87965	9.84099	9.83906	9.88411	9.65377	9.66751	9.18161	9.57938
Atn1	12.1961	12.2424	12.4381	12.4148	12.3193	12.2825	11.9658	11.7448	11.603	11.6466	11.376	11.8804
Atoh8	6.77721	6.53325	6.66162	6.96586	6.6282	6.79336	6.89609	6.63981	6.77085	6.76329	6.37832	6.52152
Atox1	10.3538	10.7123	11.1441	10.9074	10.5553	10.9924	10.4542	10.5851	10.9272	11.1215	11.6571	11.9
Atp10b	5.82326	5.78687	5.8804	5.7263	5.6937	5.6466	5.60425	5.73772	5.42043	5.50349	5.54955	5.4915
Atp10d	6.39088	6.13741	6.17848	6.34213	6.31866	6.16516	6.27422	6.0927	6.53322	6.30879	6.13664	6.75183
Atp11a	12.7421	12.5941	12.467	12.4483	12.5856	12.46	12.5569	12.4025	12.3763	12.3401	12.0816	12.2782
Atp11b	10.2717	10.2305	10.0364	10.063	10.2416	10.2131	10.3189	10.1294	10.1815	10.0215	10.1171	10.2193
Atp11c	9.62792	9.27659	9.22446	9.15004	9.25611	9.3668	9.31814	9.29751	9.14893	9.15681	8.92314	9.03721
Atp13a1	11.3163	11.2271	11.2227	11.2733	11.3744	11.2536	11.2435	11.249	11.2986	11.1407	10.9142	11.0188
Atp13a2	13.1856	13.1729	13.077	13.1511	12.9699	12.8512	12.9652	12.8923	12.6601	12.6144	12.2019	12.488
Atp13a3	12.5505	12.335	12.2343	12.1634	12.2884	12.2752	12.1946	12.1189	12.0527	12.1236	11.9051	12.0085
Atp1a1	15.5359	15.4199	15.3868	15.4492	15.3237	15.2649	15.3677	15.282	15.2037	15.1441	14.8145	14.9393
Atp1a3	5.57734	5.78687	5.83924	6.0496	6.24409	6.00832	5.82586	5.54096	5.85967	5.78053	5.90115	5.87968
Atp1b1	5.05844	5.31837	5.58246	5.05844	5.05844	5.53977	5.60425	5.30054	5.05844	5.6315	5.34289	5.30909
Atp1b2	5.78843	5.83006	5.42999	5.05844	5.86428	5.29994	5.48222	5.73772	5.73133	5.50349	5.54955	5.4915
Atp1b3	12.2001	12.2294	12.1315	12.1033	12.0108	12.126	12.3249	12.3944	12.3809	12.4641	12.7529	12.6747
Atp23	7.56817	7.41599	7.4867	7.60375	7.39568	7.57686	7.54823	7.8101	7.76558	7.89345	8.14134	8.03383
Atp2a2	13.9763	13.9057	13.8237	13.8509	13.8453	13.8453	13.8299	13.7255	13.609	13.5605	13.4024	13.5252
Atp2b1	11.2512	11.132	10.9791	10.8764	10.9944	10.9864	10.8097	10.7542	10.4693	10.4444	10.2555	10.5467
Atp2b4	6.47629	6.49374	6.17848	6.32251	6.0513	6.23452	6.1816	6.14345	6.17787	5.78053	5.85417	5.80306
Atp2c1	10.3422	10.2678	10.1481	10.0849	10.2416	10.1982	10.2835	10.2702	10.3659	10.1956	10.2432	10.0769
Atp5a1	14.3882	14.4096	14.3929	14.4084	14.5029	14.4874	14.4705	14.5163	14.476	14.4518	14.5227	14.4219
Atp5b	15.2495	15.3148	15.2629	15.2249	15.2233	15.2546	15.3253	15.3635	15.2192	15.2176	15.3346	15.2807
Atp5c1	12.5213	12.6807	12.6497	12.7027	12.6471	12.7995	12.7633	12.9307	12.9271	13.1537	13.5741	13.5454
Atp5d	12.0905	12.1634	12.172	12.0997	11.9447	12.0986	11.9849	11.983	11.9023	11.9612	11.8899	11.9975
Atp5e	11.243	11.591	11.5991	11.3711	11.1034	11.3504	11.4001	11.6071	11.6972	11.9197	12.3848	12.7368
Atp5f1	12.6831	12.8797	12.9072	12.874	12.5771	12.8099	12.9316	13.0461	13.1504	13.2838	13.7445	13.7192
Atp5g1	11.3676	11.6637	11.7018	11.6636	11.4909	11.7775	11.5405	11.6236	11.5698	11.7154	12.1158	12.2233
Atp5g2	12.0463	12.4754	12.5223	12.3072	11.8742	12.2205	12.2316	12.2921	12.1919	12.2362	12.5493	12.657
Atp5g3	12.9952	13.2424	13.3701	13.2044	13.0447	13.2369	13.1746	13.274	13.3435	13.4628	13.8117	13.9937
Atp5h	11.5038	11.6647	11.6873	11.4534	11.4014	11.6734	11.5806	11.7903	11.8351	11.9723	12.4246	12.6092
Atp5j	11.5854	12.0083	12.0676	12.0148	11.6475	11.8745	11.8	11.9062	12.1082	12.2662	12.4673	12.7411
Atp5j2	11.2788	11.4426	11.5981	11.2547	11.1332	11.339	11.3594	11.4261	11.5251	11.752	12.2695	12.4441
Atp5k	9.41003	10.1787	10.2265	10.037	9.18033	9.88741	9.73815	9.72621	9.53553	9.79602	10.5363	10.9645
Atp5l	11.0261	11.3835	11.3325	11.1876	10.8683	11.1605	11.1068	11.3282	11.4307	11.6331	12.1213	12.4299
Atp5o	12.5505	12.5577	12.6121	12.6383	12.6384	12.6782	12.6452	12.7408	12.8546	13.0656	13.4651	13.4364
Atp5s	7.3376	7.3968	7.34009	7.23912	7.50119	7.43874	7.37635	7.32525	7.51487	7.49025	7.49221	7.63072
Atp6ap1	11.5871	11.6743	11.5491	11.6375	11.4257	11.5388	11.649	11.6685	11.5466	11.4753	11.4912	11.4538
Atp6ap2	11.0571	11.1424	11.0564	10.9311	10.8594	11.0641	11.2714	11.3229	11.4224	11.5262	11.6704	11.5153
Atp6v0a1	12.1379	11.9788	11.9514	11.9168	11.9744	11.9044	11.9152	11.8033	11.6544	11.5929	11.3424	11.5409
Atp6v0a2	11.8888	11.8077	11.6931	11.6317	11.7467	11.6956	12.1246	12.0263	11.9778	11.9464	11.8534	11.7382
Atp6v0a4	7.34569	7.3871	7.2874	7.32731	7.48759	7.48637	7.42775	7.13526	7.13977	7.3504	7.56565	7.49581
Atp6v0b	11.8681	12.0144	11.8838	11.9707	11.8628	11.9903	12.1108	12.2439	12.4513	12.6087	13.0622	13.1242
Atp6v0c	14.0998	14.1247	14.3101	14.2508	14.2103	14.266	14.0494	14.0807	14.0856	14.1265	14.09	14.1616
Atp6v0d1	11.4236	11.4148	11.5084	11.5025	11.356	11.4087	11.5117	11.5795	11.6907	11.6789	11.5599	11.5766
Atp6v0e	10.9178	11.1548	11.1205	11.0577	10.9224	11.0648	11.1704	11.294	11.2974	11.4197	11.8452	11.8785
Atp6v0e2	11.4811	11.5582	11.5913	11.4126	11.2998	11.3679	11.3342	11.3957	11.1711	11.1777	11.183	11.2792
Atp6v1a	12.9496	12.8416	12.8911	12.9317	12.9664	12.948	12.9547	12.9881	13.0251	12.952	12.9358	12.7697
Atp6v1b2	12.7694	12.686	12.7579	12.8143	12.8741	12.794	12.9314	13.0102	13.106	13.1292	13.1268	12.973
Atp6v1c1	11.8129	11.8401	11.8689	11.8523	11.7604	11.7298	11.9242	11.9833	12.067	12.2086	12.35	12.2618
Atp6v1d	11.3138	11.4176	11.3993	11.3947	11.3691	11.3259	11.4165	11.4048	11.44	11.4699	11.3518	11.3117
Atp6v1e1	12.6017	12.6246	12.5737	12.5883	12.5495	12.5578	12.5907	12.7386	12.7186	12.7618	12.8924	12.8396
Atp6v1f	11.2157	11.5288	11.6775	11.7023	11.5784	11.6276	11.4597	11.5467	11.9208	12.081	12.4222	12.5776
Atp6v1g1	12.2216	12.3917	12.428	12.4098	12.2008	12.3046	12.4603	12.5645	12.7639	12.8874	13.2661	13.3011
Atp6v1g2	5.71273	5.63658	5.64353	5.7263	6.0513	5.81435	5.8972	6.23731	5.73133	6.0695	5.69046	5.71672
Atp6v1h	10.6771	10.6139	10.8504	10.7165	10.772	10.8474	10.7688	10.9315	10.9374	11.0333	11.3632	11.2097
Atp7a	10.3227	10.2779	9.97871	10.037	10.1486	9.95978	10.3178	10.1665	9.98668	10.0937	9.93155	9.83686
Atp7b	5.52305	5.78687	5.32153	5.76604	5.50944	5.73606	5.74643	5.91954	5.73133	5.05844	5.34289	5.84239
Atp8a1	8.39663	8.27785	8.14336	7.87385	8.12163	8.18116	8.54516	8.57259	8.53748	8.6264	8.37646	8.51222
Atp8b2	10.0498	10.0173	9.93838	10.1717	10.1837	10.1347	9.93192	9.93357	9.78218	9.58771	9.40051	9.72425
Atp8b3	5.46124	5.05844	5.42999	5.3946	5.65326	5.47576	5.05844	5.30054	5.05844	5.50349	5.46007	5.61614
Atp8b4	5.38768	5.50745	5.42999	5.05844	5.37799	5.39957	5.99303	6.01062	5.89773	5.68539	5.85417	5.61614
Atp9a	11.3842	11.3858	11.2065	11.2881	11.4192	11.1868	11.4661	11.4408	11.4362	11.2801	11.2872	11.2798
Atp9b	9.50674	9.51394	9.42252	9.46293	9.61964	9.57097	9.27145	9.43161	9.52935	9.28839	9.21365	9.30981
Atpaf1	9.61191	9.87606	9.89183	9.95743	9.8271	9.82766	9.90744	9.8477	10.1267	10.123	10.4179	10.2531
Atpaf2	9.4211	9.44136	9.47314	9.4592	9.61056	9.63361	9.53123	9.53606	9.60763	9.72139	9.67785	9.59076
Atpif1	10.8014	11.2872	11.3237	11.1014	10.8101	11.1781	11.1294	11.3149	11.2852	11.5849	11.8914	12.181
Atr	9.34949	9.02557	9.11558	9.20901	9.42624	9.26264	9.28718	9.21058	9.25265	9.3225	8.91145	9.17998
Atraid	8.88581	9.01042	9.0258	8.8554	8.98305	8.8161	8.81791	9.0707	9.0659	9.23822	9.64773	9.48895
Atrip	8.77475	8.78657	8.85893	8.77041	8.93283	8.87799	8.911	8.79493	9.04292	8.99082	8.95765	9.10243
Atrn	10.7951	10.6745	10.5598	10.508	10.6731	10.5159	10.6289	10.5637	10.3225	10.2408	9.97136	10.2954
Atrnl1	10.4076	10.3731	10.3085	10.3094	10.3336	10.2501	10.2007	10.2244	9.76653	9.91239	9.49989	9.79484
Atrx	12.8074	12.5201	12.5519	12.4553	12.6641	12.5254	12.5543	12.4075	12.3251	12.297	11.9808	12.23
Atxn1	7.77694	7.64334	7.60199	7.69115	7.93257	7.9002	7.70073	7.58922	7.55722	7.75485	7.37979	7.45343
Atxn10	12.0546	11.9597	11.9215	11.8908	11.9824	11.9749	12.0703	12.1341	12.102	12.173	12.2539	12.0622
Atxn1l	10.5334	10.48	10.454	10.4871	10.3445	10.2831	10.3912	10.221	9.9096	10.0436	9.78177	10.0524
Atxn2	10.738	10.5495	10.4923	10.3581	10.4826	10.4185	10.4026	10.2278	10.0061	9.88009	9.74941	10.097
Atxn2l	12.4554	12.4891	12.513	12.4713	12.3156	12.3469	12.145	12.0556	11.8794	11.8186	11.6177	12.0795
Atxn3	9.80024	9.59929	9.56083	9.48876	9.51164	9.70179	9.73979	9.92101	9.81299	9.81494	9.88267	9.61698
Atxn7	8.48782	8.38582	8.29062	8.08512	8.30723	8.19989	8.47979	8.4251	8.10094	8.17868	8.02922	8.29557
Atxn7l1	8.14126	8.00265	7.97881	8.01476	7.86164	8.07342	8.17338	8.13401	7.91472	7.87352	7.9388	8.12661
Atxn7l2	8.2288	8.31807	8.19972	8.0199	8.11731	8.23209	8.16848	7.87649	7.74393	7.96415	7.77364	7.82085
Atxn7l3	10.8783	10.7244	10.6524	10.6494	10.7047	10.6589	10.5923	10.638	10.428	10.3139	10.2524	10.3961
Atxn7l3b	10.7314	10.8451	10.4957	10.6404	10.7807	10.6944	10.6773	10.7975	10.6714	10.7162	10.8146	10.7378
AU019823	9.20954	9.1076	9.14429	9.1454	9.14509	9.05671	9.07299	9.15912	9.35404	9.39753	9.65474	9.64638
AU022252	8.76897	8.783	8.81308	8.41168	8.80827	8.62972	8.63261	8.75758	8.78325	8.74294	8.8838	8.95716
AU040320	9.71591	9.75796	9.75918	9.78217	9.8153	9.67722	9.76565	9.81187	9.52315	9.51799	9.29074	9.47467
Auh	8.62894	8.49053	8.53711	8.42714	8.19311	8.48529	8.63614	8.83731	8.73018	8.59871	8.77612	8.85036
Aunip	8.32317	8.30312	8.42395	8.44624	8.31852	8.4271	8.35221	8.52511	8.57012	8.53749	8.51739	8.67527
Aup1	12.0716	12.149	12.2577	12.2681	12.1983	12.1619	12.1438	12.1868	12.2987	12.2842	12.4493	12.3947
Aurka	11.401	11.3225	11.3442	11.377	11.3524	11.4642	11.3955	11.4761	11.4146	11.5386	11.7219	11.5506
Aurkaip1	10.0722	10.0561	10.0561	10.0507	10.2878	10.1359	10.1377	10.2724	10.479	10.5942	10.8907	10.8821
Aurkb	11.3667	11.589	11.5934	11.6309	11.3983	11.4922	11.361	11.4103	11.4471	11.4056	11.2819	11.3094
Aven	9.95792	9.8389	9.88336	10.0207	10.0659	9.84246	9.99885	10.0826	10.0613	9.86201	9.92384	9.83367
Avl9	10.9282	10.6841	10.781	10.8645	11.044	10.8757	10.9628	10.9474	11.221	11.3264	11.2683	11.039
Avpi1	8.96125	9.04355	9.15562	9.17301	9.05635	9.14793	9.13397	9.35266	9.53141	9.65991	10.2385	10.2896
AW209491	8.52959	8.74682	8.56725	8.68645	8.81622	8.70982	8.65017	8.72568	8.72657	9.1541	9.33799	9.31669
AW549877	10.2293	10.1473	9.97711	9.95346	10.078	10.092	10.3101	10.1934	10.2506	10.219	10.2662	10.2495
AW554918	7.49802	7.62714	7.45864	7.63124	7.52798	7.59137	7.58612	7.49911	7.76558	7.7837	7.7381	7.5689
Awat2	5.46124	5.94603	5.42999	5.29641	5.50944	5.59597	5.60425	5.5973	5.6822	5.82336	5.80393	5.94911
Axin1	10.8809	10.7198	10.7828	10.7617	10.8271	10.854	10.8495	10.824	10.7451	10.6574	10.731	10.6822
Axin2	7.96843	8.29307	8.17182	8.27721	8.16829	8.17644	8.60044	8.29144	8.49559	8.24176	8.04374	8.09995
Axl	7.56817	7.33752	7.9527	8.03523	8.49127	8.54484	7.91062	7.81627	8.35727	8.20002	8.23889	8.51624
Azgp1	6.69892	6.60831	6.62554	6.59989	5.97642	6.29924	6.54483	6.69952	6.64109	6.30879	6.63945	6.60917
Azi2	10.1705	10.0516	10.2332	10.0752	10.1837	10.2085	10.4432	10.3772	10.5996	10.6996	10.7529	10.5832
Azin1	11.2278	11.0952	11.2287	11.0912	11.1727	11.1623	11.2279	11.3255	11.423	11.4347	11.5106	11.4673
Azin2	6.64367	6.21962	6.50989	6.61511	6.43735	6.45408	6.1816	6.32288	6.80118	6.15623	6.5963	6.87918
B230118H07Rik	8.66682	8.88303	8.82379	8.9936	8.90331	8.85473	9.00929	8.99795	9.17293	9.12401	9.29074	9.25595
B230219D22Rik	10.8189	10.7574	10.5996	10.5843	10.5402	10.6614	10.3766	10.4958	10.4704	10.4836	10.677	10.5379
B2m	10.6586	10.6917	11.3975	11.0516	11.0407	11.192	13.4852	13.4185	13.7783	13.7339	13.8163	13.9628
B3galnt2	8.51234	8.55906	8.51519	8.70237	8.75689	8.55211	8.58225	8.71272	8.8277	8.81679	8.71908	8.81182
B3galt1	7.74127	7.60248	7.41052	7.82745	7.61156	7.89442	7.8317	7.75973	8.00793	7.89345	7.5554	7.77403
B3galt4	6.25815	6.45275	6.5692	6.63013	6.38812	6.55708	6.52761	6.42063	6.39245	6.42027	6.74077	6.73681
B3galt5	7.93219	7.8862	7.79956	7.88521	7.74229	7.71545	7.93981	8.10929	7.91472	7.7837	7.81682	7.82741
B3galt6	8.09535	8.19378	8.1491	8.34808	8.39515	8.28998	8.32613	8.26936	8.42141	8.46037	8.79323	8.51624
B3gat2	5.46124	5.57622	5.69851	5.68385	5.73157	5.69301	5.96236	5.64805	5.8195	6.12823	5.90115	6.01294
B3gat3	9.39138	9.75252	9.46407	9.4592	9.42452	9.6421	9.48913	9.53422	9.43339	9.61742	9.54335	9.57556
B3glct	9.32414	9.29169	9.18079	9.2763	9.23458	9.19492	9.23018	9.16861	9.17557	9.07622	8.96521	9.13135
B3gnt2	8.93568	9.09616	9.03196	9.11725	8.98305	9.16455	9.28942	9.26026	9.37257	9.59768	10.0425	9.62624
B3gnt3	6.7256	7.0187	6.8424	7.34426	7.37354	7.19068	7.12713	7.27109	7.36964	7.25884	7.34414	7.3827
B3gnt4	5.05844	5.83006	5.32153	5.3946	5.28462	5.69301	5.5472	5.64805	5.56905	5.4223	5.69046	5.05844
B3gnt7	5.38768	5.63658	5.05844	5.29641	5.65326	5.39957	5.05844	5.4768	5.31474	5.50349	5.46007	5.05844
B3gnt8	5.2915	5.31837	5.51288	5.29641	5.37799	5.39957	5.70274	5.05844	5.31474	5.05844	5.05844	5.41247
B3gnt9	7.58178	7.82409	7.57625	7.79763	7.8301	7.82924	7.76121	7.41087	7.65376	7.47242	7.85868	7.50413
B3gntl1	6.81451	6.66153	6.87254	6.74379	6.768	6.7799	6.93357	6.75634	6.84531	7.29007	7.12152	7.05435
B4galnt1	5.05844	5.50745	5.05844	5.05844	5.80115	5.05844	5.48222	5.30054	5.42043	5.05844	5.05844	5.41247
B4galt1	9.40074	9.55412	9.35295	9.32015	9.55487	9.49237	9.55183	9.66055	9.60372	9.52009	9.62888	9.54076
B4galt2	8.30318	8.48173	8.14336	8.26864	8.07337	8.24566	7.7743	7.84067	7.72931	7.87352	7.7381	7.60016
B4galt3	9.0473	9.18787	9.11848	9.18887	9.12182	9.17631	9.19247	9.13025	9.23756	9.14323	8.95005	9.17746
B4galt4	7.56132	7.47195	7.29811	7.14455	7.05512	7.34675	7.11653	7.58922	7.3981	7.38915	7.06307	7.41853
B4galt5	10.7701	10.6396	10.7252	10.7094	10.8094	10.7706	10.7422	10.724	10.7218	10.8588	10.6054	10.719
B4galt6	9.6469	9.50534	9.4084	9.37858	9.53901	9.25601	9.51797	9.34849	9.19393	9.08477	8.87178	9.05654
B4galt7	9.08729	9.23031	9.01651	9.20009	9.0719	9.05161	9.23018	9.16861	9.2651	9.40664	9.45508	9.19001
B4gat1	8.56349	8.69076	8.62566	8.64419	8.81093	8.53386	8.52624	8.49887	8.69736	8.70638	8.83511	8.77555
B9d1	7.54751	7.9776	8.10252	8.0096	7.77588	8.0632	7.7743	7.96219	8.38512	8.34577	8.84334	8.80856
B9d2	7.72308	7.8862	8.24323	8.26864	8.0326	8.18587	8.2072	7.97871	8.5416	8.6027	9.0529	9.04828
Baalc	5.52305	5.69093	5.51288	5.3946	5.76728	5.6466	5.30369	5.8162	5.31474	5.6315	5.62462	5.05844
Babam1	10.7737	10.9253	10.9306	10.9518	10.8061	10.8978	10.9181	10.8949	11.0166	10.902	11.1203	10.9231
Babam2	9.21379	9.19592	9.45494	9.23979	9.31509	9.35857	9.01201	9.11313	9.20173	9.18887	9.08791	9.15459
Bace1	10.1529	9.96182	9.78853	9.8146	9.88592	9.78385	9.96856	10.0041	9.86782	9.67129	9.5977	9.71907
Bace2	11.8111	11.7849	11.8529	11.8721	11.7398	11.6886	12.2258	12.2573	12.3908	12.3516	12.3746	12.3312
Bach1	9.68259	9.66835	9.86109	9.8591	10.1138	9.84981	9.81603	9.71494	9.92221	9.81152	9.87269	9.67162
Bach2	6.81451	6.99259	6.82705	6.61511	7.03598	6.96764	6.74789	6.77013	6.78611	6.35483	6.17037	6.44604
Bad	8.89911	9.14968	9.31054	9.16157	8.81622	9.11654	9.20199	9.17805	9.2069	9.3225	9.62888	9.65001
Bag1	11.8671	11.8143	11.7617	11.7885	11.8533	11.8318	11.9181	11.9993	11.9766	12.0806	12.3651	12.1297
Bag2	9.91423	9.96339	10.0164	9.97188	10.0176	10.1262	9.97827	10.1172	10.0281	10.1771	10.3317	10.409
Bag3	9.98177	10.078	10.0546	9.87036	9.94965	9.93514	9.95458	9.90126	9.77872	9.75385	9.51281	9.92491
Bag4	9.90638	9.91228	9.74989	9.85485	9.89964	9.78385	9.71178	9.8477	9.72212	9.71591	9.67785	9.72597
Bag5	10.7454	10.8434	10.7946	10.6681	10.6534	10.6573	10.6611	10.644	10.5878	10.7153	10.609	10.5063
Bag6	13.0741	13.0414	12.9637	13.012	12.9984	12.9681	12.9264	12.7818	12.513	12.4612	12.1459	12.4212
Bahcc1	11.3417	11.1637	10.8873	10.8525	10.9399	10.7066	10.7696	10.4372	10.0149	10.21	9.73185	10.1671
Bahd1	9.54772	9.4814	9.4844	9.41369	9.57523	9.47916	9.37182	9.37332	9.07725	9.07908	8.78897	9.08101
Baiap2	9.25772	9.2459	9.38696	9.23979	9.07851	9.11898	8.89345	8.91848	8.81417	8.84731	8.67358	8.79874
Baiap2l1	9.13969	9.05836	9.12713	8.93022	8.93039	8.97014	9.20673	9.08833	8.8411	8.88374	8.8185	8.66448
Baiap2l2	5.9479	5.98111	6.02597	5.58818	5.73157	5.59597	5.78732	5.64805	5.42043	5.6315	5.69046	5.84239
Bak1	11.8918	11.9538	11.8098	11.9714	12.0256	11.9059	12.3837	12.3726	12.3823	12.2445	12.2197	12.268
Bambi	8.48428	8.32302	8.35639	8.46882	8.29584	8.29868	8.25414	8.60104	8.39884	8.48222	8.90361	8.64997
Banf1	11.2435	11.5351	11.5346	11.4729	11.3153	11.5228	11.3913	11.554	11.5833	11.6524	11.8864	12.0021
Banp	8.93826	8.9127	8.94969	8.89468	8.82412	9.00223	8.88459	8.8193	8.77977	8.57454	8.70105	8.64632
Bap1	10.9626	10.9229	10.7534	10.8806	10.9144	10.89	10.9656	10.9294	10.9989	11.023	11.0575	10.9388
Bard1	9.64533	9.53312	9.36762	9.50332	9.51651	9.57806	9.47547	9.49519	9.62896	9.48613	9.14885	9.45195
Basp1	7.86777	7.82409	7.89895	7.9782	7.9811	7.85925	7.66593	7.71408	7.64597	7.79791	7.54507	7.48744
Batf	6.08035	5.87076	6.35748	5.99487	6.42119	6.37953	5.8972	5.73772	6.49482	6.48191	6.48061	6.62592
Batf2	5.05844	5.05844	5.05844	5.05844	5.44941	5.39957	7.52498	7.2146	7.48001	7.7837	7.52417	7.61552
Batf3	6.42587	6.66153	6.50989	6.59989	6.31866	6.66639	6.643	6.78376	6.60626	6.82419	7.03281	7.23898
Bax	12.0265	12.1497	12.2511	12.0853	12.0299	12.1182	11.954	11.9817	11.9592	12.0599	12.2162	12.2765
Baz1a	11.4669	11.3622	11.2908	11.3125	11.3296	11.2178	11.3583	11.2361	11.1084	10.9991	10.5134	10.9447
Baz1b	12.4392	12.3779	12.2711	12.3023	12.3694	12.2801	12.3982	12.2509	12.0716	11.9921	11.723	11.9644
Baz2a	10.955	10.7931	10.781	10.6494	10.6304	10.5984	10.8817	10.6035	10.3094	10.2585	9.72743	10.3611
Baz2b	8.79767	8.90288	8.85545	8.86955	8.68054	8.82211	8.67439	8.42908	8.2802	8.52913	8.45408	8.82155
Bbc3	7.56817	7.81702	7.94609	7.91321	7.9906	7.75444	7.34095	7.34282	7.66151	7.40811	7.90731	7.99956
Bbip1	8.30318	8.52092	8.76571	8.43481	8.55297	8.5228	8.78654	8.72568	8.94091	9.02085	9.45776	9.56213
Bbof1	5.91862	5.83006	5.79556	5.80351	5.76728	5.91745	5.78732	6.14345	5.50121	5.93837	6.10161	5.41247
Bbs1	7.2364	7.45356	7.18688	7.15433	7.17303	6.92031	7.05098	7.38575	7.0201	7.149	6.85195	7.03077
Bbs10	6.86253	6.77701	6.42548	6.67406	6.73149	6.83285	6.74789	6.5929	7.11671	7.22685	7.01741	6.8382
Bbs12	7.22761	6.96592	6.91641	6.70245	6.86026	6.9442	6.83096	6.94835	6.77085	7.16041	7.00182	6.98225
Bbs2	7.56817	7.4901	7.76226	7.70412	7.44595	7.51721	7.62298	7.49911	7.61436	7.88684	7.83372	7.61552
Bbs4	8.48074	8.35235	8.24857	8.41556	8.24541	8.1717	8.51092	8.49887	8.5292	8.50373	8.94624	8.83122
Bbs5	6.92001	7.10607	7.01312	6.88422	6.93564	7.0244	6.87045	7.01751	7.1736	7.3602	7.48138	7.3365
Bbs7	8.58674	8.60433	8.54579	8.65405	8.51432	8.49665	8.65365	8.65966	8.64093	8.71744	8.89572	8.64266
Bbs9	8.00375	7.93265	7.89208	7.9729	7.89249	7.77982	7.85646	7.89987	7.90181	7.91309	7.6546	7.60016
Bbx	9.86378	9.73239	9.68114	9.66252	9.73548	9.68217	10.0392	9.92241	9.92535	9.90116	9.40883	9.68761
BC003331	9.34949	9.50964	9.36519	9.35067	9.29254	9.47916	9.47547	9.64705	9.78218	9.80293	9.76244	9.57747
BC003965	8.61286	8.57569	8.70902	8.57315	8.66887	8.63998	8.68806	8.65628	8.90628	8.90646	9.2294	9.37278
BC004004	10.5587	10.6229	10.5672	10.6189	10.5615	10.6243	10.6799	10.796	10.7335	10.8455	11.0451	10.8673
BC005537	11.1144	11.0346	11.1068	11.0773	11.0574	11.0804	11.1601	11.0578	11.0749	11.1118	10.8818	11.0321
BC005624	9.63902	9.79195	9.77942	9.72281	9.6136	9.73391	9.82067	9.81035	9.69847	9.64268	9.83208	9.76835
BC017158	8.94597	8.84248	8.9819	9.06906	8.95936	8.90372	9.00929	8.92971	8.91897	8.94143	8.74129	8.63531
BC017643	9.41926	9.44361	9.26945	9.37858	9.47542	9.50732	9.76244	9.98676	10.0061	9.97947	10.3097	10.2266
BC022687	7.88416	7.69856	7.98526	7.83333	7.7814	7.59857	7.76121	7.93985	7.78689	8.00126	7.89129	8.05622
BC024978	8.03333	8.09858	7.96581	8.05038	8.04632	8.1185	7.93402	7.87059	7.98368	7.6409	7.49221	7.81426
BC025920	5.85645	5.50745	5.64353	5.68385	5.83342	5.53977	5.74643	5.64805	5.05844	5.57167	5.90115	5.66863
BC028528	5.38768	5.50745	5.32153	5.05844	5.05844	5.47576	5.05844	5.30054	5.31474	5.57167	5.85417	5.41247
BC030336	9.38762	9.45035	9.33065	9.22887	9.28114	9.34198	9.63491	9.31684	9.42232	9.46231	9.42533	9.4054
BC030867	9.46099	9.49451	9.51546	9.54788	9.57679	9.34407	9.3377	9.28665	9.11078	9.13503	8.82683	9.09443
BC031181	10.0804	10.1067	10.0379	10.0482	9.91446	9.96656	10.1513	10.1439	9.95787	10.292	10.3888	10.5564
BC034090	5.2915	5.31837	5.05844	5.46969	5.05844	5.29994	5.5472	5.30054	5.31474	5.05844	5.54955	5.05844
BC037034	8.05271	8.24691	8.18305	7.95688	7.92762	8.01095	7.96274	8.0892	7.77272	7.70285	7.43718	8.04507
BC048403	8.06707	8.37634	8.31628	8.2071	8.30344	8.24115	8.31291	8.15829	8.3096	8.02545	7.90731	8.09995
BC049715	6.82669	7.05688	6.87254	6.80965	6.95636	6.62082	6.81751	6.91227	6.80118	6.73163	6.81602	6.55741
BC051019	5.52305	5.63658	5.32153	5.53278	5.28462	5.6466	5.40487	5.30054	5.05844	5.05844	5.54955	5.4915
BC052040	8.80334	8.65604	8.88643	8.64419	8.77059	8.78873	8.76738	8.80717	8.66377	8.53332	8.52767	8.64997
BC055324	9.62314	9.53523	9.46861	9.62642	9.75482	9.65558	9.77364	9.71008	9.85965	9.89794	10.0065	9.84004
Bcam	6.60043	6.51367	7.25474	7.17365	7.52798	7.34675	6.20561	6.43913	6.95574	6.76329	7.35613	7.21857
Bcan	7.74127	7.61075	7.44915	7.13471	7.32813	7.30274	7.50926	7.75973	6.84531	7.04146	6.85195	6.75183
Bcap29	10.1694	10.0112	10.131	9.9823	10.2288	10.1691	10.3211	10.279	10.5858	10.6527	11.0362	10.8182
Bcap31	11.1201	11.4108	11.3149	11.3325	10.9662	11.2115	11.3004	11.3282	11.3995	11.4325	11.8396	11.8766
Bcar1	10.8092	10.8331	11.039	11.0688	11.0685	11.0457	10.4291	10.4353	10.4224	10.3754	10.1488	10.5182
Bcar3	6.98565	7.09395	6.4685	6.56882	6.28207	6.5894	6.59498	6.57683	5.93397	5.90196	6.20292	6.07223
Bcas1	5.46124	5.50745	5.05844	5.53278	5.37799	5.05844	5.60425	5.54096	5.31474	5.6315	5.34289	5.76132
Bcas2	10.9269	11.1445	11.1377	11.1085	10.9448	11.0717	11.1626	11.2163	11.4168	11.4844	11.8564	11.7974
Bcas3	9.69327	9.69128	9.60482	9.54963	9.41586	9.54946	9.46168	9.48383	9.31386	9.30066	9.26346	9.15971
Bcat1	11.1733	11.1712	11.2676	11.3947	11.4723	11.4513	11.2232	11.1886	11.2127	11.2789	11.2476	11.2371
Bcat2	10.3983	10.5221	10.5243	10.5286	10.3179	10.4842	10.3787	10.5502	10.3899	10.4532	10.6305	10.5613
Bccip	10.6014	10.6357	10.7682	10.8722	10.8048	10.8178	10.7332	10.9418	11.0312	11.0773	11.2827	11.1704
Bcdin3d	7.99876	8.14978	8.20523	8.2338	8.13451	8.19989	8.08249	8.09928	8.48278	8.45153	8.64085	8.51624
Bche	5.52305	5.42554	5.64353	5.53278	5.56216	5.47576	5.5472	5.4768	6.03372	6.0695	5.54955	5.41247
Bckdha	8.6637	8.77943	8.88302	8.84684	8.89833	8.87511	8.57859	8.7449	8.59412	8.70638	8.6828	8.74518
Bckdhb	8.16366	8.60028	8.34647	8.29843	8.35187	8.39911	8.30848	8.28265	8.40791	8.57454	8.54295	8.52821
Bckdk	10.7744	10.751	10.7413	10.7625	10.8517	10.9259	10.7949	10.8277	10.8551	10.9502	11	10.8989
Bcl10	9.09424	9.18517	9.40129	9.15235	9.47208	9.37294	9.22552	9.29318	9.44437	9.51799	9.90242	9.93238
Bcl11a	6.45974	6.43165	6.20615	5.93625	6.35398	6.16516	6.1816	6.30217	5.9686	6.0695	6.10161	6.07223
Bcl2	9.35142	9.21981	9.10393	9.02173	9.23655	9.23369	9.02817	9.02436	8.96863	8.91927	8.8185	9.11301
Bcl2l1	10.0138	9.97744	9.89857	10.1278	10.0868	10.0105	9.88402	9.82691	9.79081	9.84705	9.70285	9.81115
Bcl2l11	7.39324	7.49909	7.12748	7.16403	7.01654	7.21003	7.11653	7.43551	7.04495	6.88219	7.09263	7.40073
Bcl2l12	7.80021	7.80275	7.89895	7.69115	7.58639	7.79856	7.73466	7.61084	7.69206	7.85331	8.00716	7.84691
Bcl2l13	11.5266	11.5123	11.6343	11.7038	11.6976	11.6984	11.5851	11.5874	11.675	11.7422	11.6367	11.6481
Bcl2l2	8.66058	8.68312	8.62566	8.56619	8.49789	8.63657	8.71165	8.62547	8.3096	8.16246	8.31234	8.62049
Bcl3	5.38768	5.83006	6.12055	6.68834	6.66801	6.66639	5.78732	5.88668	6.47511	5.82336	6.5963	6.55741
Bcl6	6.69892	6.71241	6.82705	6.85986	7.07398	6.71025	6.99364	7.24315	6.83078	6.74756	6.5963	6.98225
Bcl7a	9.61673	9.6509	9.30038	9.4252	9.47542	9.28452	9.44975	9.37537	9.29213	9.31283	9.08445	9.03164
Bcl7b	9.443	9.57277	9.68699	9.55313	9.53901	9.49612	9.52177	9.47812	9.41786	9.53263	9.52306	9.56405
Bcl7c	10.0015	10.1152	10.3582	10.3207	10.2269	10.2754	10.0245	10.0146	10.1657	10.2446	10.2964	10.2266
Bcl9	9.45382	9.35536	9.22446	9.12434	9.28305	9.0362	9.2961	9.12294	9.06019	9.05607	8.80592	9.10243
Bcl9l	10.9146	10.9666	10.7973	10.8115	10.8134	10.8215	10.7051	10.5042	10.2419	10.2735	10.0619	10.4281
Bclaf1	12.2769	12.2482	12.2462	12.2391	12.2136	12.1896	12.2275	12.1766	12.0695	12.0671	11.871	11.9597
Bclaf3	8.01862	7.9839	8.01709	8.0554	7.97632	8.15259	7.9165	7.86465	8.22467	7.86008	8.10726	8.20865
Bco2	5.9479	5.69093	6.02597	5.7263	5.8939	5.6466	6.02261	6.16781	6.27898	6.12823	6.13664	6.38575
Bcor	10.5925	10.4634	10.3558	10.3278	10.42	10.3342	10.3523	10.1282	9.83818	9.86696	9.72964	9.78166
Bcorl1	8.7544	8.54224	8.69351	8.65077	8.77332	8.70982	8.55265	8.31318	8.0953	8.23661	8.29433	8.5751
Bcr	10.5637	10.52	10.5045	10.5392	10.6919	10.5085	10.3351	10.2119	10.1227	10.1503	9.84234	10.1479
Bcs1l	8.08128	8.14418	8.36624	8.27293	8.48795	8.45067	8.21196	8.51766	8.42141	8.45153	8.76749	8.37301
Bdh1	10.7915	10.8176	10.951	11.1501	11.0646	11.0804	10.9381	10.9827	11.0586	11.0558	11.0983	11.0376
Bdh2	8.24147	8.35235	8.29579	8.07034	8.34453	8.32872	8.45597	8.52139	8.60203	8.59471	8.99134	8.74518
Bdnf	6.40852	6.29534	6.53001	6.34213	6.22453	6.50678	5.96236	5.8162	6.27898	6.6312	6.29446	6.64242
Bdp1	10.2167	9.95867	9.96432	9.94017	9.97461	9.96791	10.1377	9.9961	9.78045	9.95952	9.36104	9.62992
Becn1	11.2839	11.3455	11.4093	11.2221	11.3185	11.3206	11.2515	11.3744	11.3136	11.2795	11.3921	11.2728
Begain	5.82326	5.57622	5.64353	5.58818	5.94986	5.6466	5.65564	5.64805	5.62858	5.82336	5.62462	5.4915
Bend3	9.78462	9.57689	9.71018	9.5774	9.71022	9.6285	9.52367	9.32959	9.29699	9.1756	8.93858	9.29595
Bend4	9.40632	9.27406	8.92007	9.12669	9.45189	8.97285	9.03884	8.99261	8.77279	8.88701	8.53278	8.81831
Bend6	9.55108	9.55412	9.50223	9.50874	9.58453	9.63361	9.53876	9.75638	9.56198	9.61349	9.98253	9.8527
Bend7	5.52305	5.63658	5.05844	5.05844	5.28462	5.05844	5.5472	5.30054	5.50121	5.6315	5.34289	5.41247
Bet1	9.87857	9.89263	10.0425	9.94017	9.95324	10.155	9.99066	10.07	10.3716	10.5711	10.7605	10.8533
Bet1l	7.71082	7.95209	8.02337	7.94066	7.88228	7.94556	8.14374	7.91141	8.34313	8.59871	8.61218	8.77221
Bex3	9.80869	10.1719	10.2478	10.2143	9.86573	10.0708	10.0325	10.0419	10.1591	10.1745	10.4901	10.3798
Bfar	9.74409	9.56452	9.66935	9.73519	9.69599	9.6871	9.67129	9.78285	9.96551	10.1824	10.3776	10.2626
Bfsp2	10.2879	10.2601	10.1253	10.1196	9.98634	10.0556	10.4271	10.4625	10.2343	10.1851	10.5897	10.3622
Bglap2	5.62626	5.42554	5.69851	5.05844	5.60969	5.73606	5.65564	5.5973	5.50121	5.57167	5.46007	5.76132
Bhlhb9	9.22859	9.06424	9.20006	8.96226	9.25027	9.19029	9.16352	9.14476	9.20432	9.17293	9.02064	9.0971
Bhlhe40	10.5224	10.4963	10.5882	10.478	10.567	10.5085	10.5815	10.5079	10.4313	10.5259	10.2964	10.446
Bhlhe41	12.0786	12.1921	12.2175	12.3513	12.3005	12.1345	12.3446	12.2369	12.3206	12.3171	11.9715	12.2083
Bicd1	9.23488	9.20924	9.2325	9.13841	9.31136	9.29534	9.18768	9.26026	9.584	9.5857	9.61696	9.46026
Bicd2	11.1842	11.1137	11.0617	11.1037	11.0641	10.981	11.125	11.0604	10.869	10.9156	10.5287	10.7421
Bicdl1	5.67111	6.04706	5.74887	5.87287	6.02708	5.88466	5.82586	5.88668	5.85967	6.0695	5.94538	5.80306
Bicra	8.54664	8.48614	8.46115	8.22051	8.43715	8.39506	8.04549	7.91141	7.74393	7.82589	7.56565	8.14236
Bicral	8.76606	8.73578	8.40974	8.5093	8.75689	8.72274	8.5186	8.44095	8.06101	8.38346	7.97719	8.48791
Bid	8.56349	8.58804	8.80228	8.78243	8.94495	9.1141	9.43772	9.46856	9.67816	9.81665	10.0567	10.0065
Bin1	9.7889	9.97744	9.9803	9.89263	9.87839	10.0183	9.82529	9.8682	9.62896	9.54711	9.58063	9.52501
Bin2	5.05844	5.05844	5.32153	5.3946	5.37799	5.6466	5.30369	5.05844	5.05844	5.31606	5.34289	5.30909
Bin3	10.1194	10.1665	10.3072	10.2969	10.2533	10.3539	10.2936	10.4353	10.5508	10.6373	10.9478	10.8634
Birc2	8.08599	8.09858	8.18305	8.14743	8.32973	8.5265	8.11345	8.30886	8.81417	8.78561	9.32339	8.90323
Birc3	6.15107	6.77701	7.07791	7.06358	7.20724	7.23854	6.37903	6.34318	7.04495	7.02893	7.10715	7.12257
Birc5	11.2969	11.5731	11.5389	11.5107	11.3722	11.5653	11.4803	11.5997	11.6243	11.6685	11.9202	11.949
Birc6	11.9418	11.6036	11.509	11.3917	11.7487	11.4671	11.6477	11.1845	11.0593	10.9916	10.6975	11.2103
Bivm	9.51881	9.33121	9.53508	9.59958	9.55171	9.63191	9.54997	9.73899	9.9594	10.0739	10.1685	10.1671
Blcap	9.08961	9.11894	9.04116	9.20456	9.25805	9.28017	9.19008	9.21058	9.09969	9.30554	9.17186	9.41398
Blm	10.0908	10.0308	9.97711	10.0067	10.1434	10.0845	10.0563	10.1318	10.0584	10.123	9.86868	9.88849
Blmh	11.2346	11.1934	11.226	11.3542	11.3538	11.4032	11.3493	11.4157	11.4821	11.4731	11.7548	11.5048
Bloc1s1	8.51926	9.09903	8.94316	8.97278	8.3987	8.67699	8.75446	9.0707	8.89348	9.15139	9.46841	9.54856
Bloc1s2	10.3227	10.703	10.5924	10.7235	10.5418	10.5826	10.4934	10.6734	10.7557	10.9148	11.2569	11.2592
Bloc1s3	8.26234	8.02114	8.16051	8.27293	8.27666	8.19056	7.97968	8.06882	8.18286	8.32654	8.2638	8.27196
Bloc1s4	8.87239	8.97962	8.8966	8.91393	8.92306	8.98628	8.84861	8.84919	9.05158	9.18092	9.06701	9.11037
Bloc1s5	9.40632	9.24848	9.18632	9.47036	9.47875	9.36885	9.5065	9.54882	9.72392	9.76981	10.1322	9.87304
Bloc1s6	8.88848	8.81829	8.90671	8.90021	8.94495	8.88948	8.9168	9.0707	9.14893	9.16489	9.21681	9.40755
Blvra	9.42844	9.74158	9.57985	9.6347	9.61056	9.68874	9.77683	9.80429	9.97764	10.271	10.5426	10.5212
Blvrb	9.20099	9.40249	9.5903	9.60127	9.41759	9.34615	9.41949	9.54519	9.67816	9.76451	9.91803	10.1389
Blzf1	9.77028	9.71944	9.75547	9.75203	9.64653	9.86584	9.80516	9.82391	9.78909	9.83361	10.1052	9.89462
Bmf	6.35468	6.51367	6.67924	6.32251	6.49965	6.09022	6.5618	6.47521	6.32589	6.54026	6.50473	6.29952
Bmi1	11.8751	11.8307	11.7299	11.6868	11.7723	11.8763	11.8294	11.8726	11.9407	12.0216	12.1919	12.0281
Bmp1	8.50188	8.36679	8.38574	8.50567	8.75689	8.56294	8.0877	8.1389	7.83537	7.83279	8.07938	8.28617
Bmp2k	9.02566	8.95449	9.02889	9.11012	9.48041	9.3912	8.99292	9.21746	9.30665	9.16489	9.39494	9.1825
Bmp8a	5.38768	5.05844	5.05844	5.58818	5.28462	5.39957	5.05844	5.05844	5.62858	5.4223	5.34289	5.4915
Bmpr1a	10.3187	10.1208	10.1871	10.0728	10.2357	10.3184	10.3661	10.4343	10.4401	10.5559	10.621	10.4646
Bmpr1b	5.52305	5.42554	5.32153	5.46969	5.56216	5.39957	5.60425	5.88668	5.62858	5.31606	5.05844	5.4915
Bmpr2	11.2651	10.8391	10.6722	10.7481	10.9144	10.7551	10.9152	10.6767	10.4896	10.6565	10.4055	10.6436
Bms1	12.165	12.118	12.3019	12.3093	12.3792	12.2727	12.1579	12.0376	12.0198	11.8254	11.6531	11.8105
Bmt2	9.70841	9.55829	9.81193	9.52309	9.74932	9.74341	9.76084	9.74217	10.0237	10.1449	10.0336	9.97063
Bnc2	9.31823	9.23552	9.37248	9.41561	9.20066	9.23593	9.35912	9.3317	9.19654	9.28345	9.0024	9.18501
Bnip1	8.51581	8.61643	8.78777	8.82375	8.60599	8.66699	8.74143	8.96287	9.05158	9.02678	9.54083	9.38373
Bnip2	11.6138	11.6051	11.6201	11.7537	11.7044	11.6931	11.7263	11.846	11.929	11.9429	12.1099	11.8692
Bnip3	8.45927	8.22589	8.18305	8.22051	8.26502	8.51165	8.55265	8.68644	8.79018	9.05026	9.53324	9.37497
Bnip3l	10.0015	10.0338	9.87141	10.0333	10.0244	10.0745	9.93619	10.2812	10.4079	10.4277	10.8827	10.6893
Bnip3l-ps	5.57734	5.05844	5.32153	5.05844	5.37799	5.29994	5.48222	5.64805	5.62858	5.6315	5.05844	5.4915
Boc	9.54604	9.63719	9.4844	9.54612	9.51812	9.64717	9.26692	9.49141	9.10802	9.18092	9.27261	9.23672
Bod1	10.4168	10.5846	10.759	10.8461	10.6731	10.8163	10.6576	10.7264	11.0026	11.0759	11.3603	11.2839
Bod1l	10.3653	10.2147	10.0226	9.9797	10.1159	9.98134	10.1756	9.75324	9.66132	9.96568	9.30567	9.75324
Bok	5.67111	5.83006	5.91939	5.87287	5.92239	6.18885	5.74643	6.0927	5.93397	6.03859	6.17037	5.4915
Bola1	8.42645	8.43687	8.58839	8.53803	8.35187	8.5228	8.29509	8.42908	8.6099	8.99688	9.2073	9.37278
Bola2	10.415	10.7002	10.9232	10.7211	10.3372	10.709	10.5068	10.6783	10.8024	10.944	11.3279	11.6285
Bola3	10.1171	10.4931	10.7819	10.7427	10.4449	10.7362	10.3974	10.4825	10.8024	11.0587	11.4232	11.5128
Bop1	12.2318	12.3629	12.4172	12.4669	12.3841	12.4135	12.3912	12.4432	12.4573	12.4303	12.4709	12.4097
Bora	8.94083	8.80428	8.90671	8.84684	8.80827	8.79485	8.71165	8.64609	8.75873	8.58668	8.8017	8.85668
Borcs5	8.23726	8.09277	8.16051	8.30263	8.14303	8.26356	8.13873	8.06368	8.34313	8.32169	8.29433	7.9405
Borcs6	8.56349	8.85613	8.80228	8.95697	8.98305	8.78873	8.66752	8.81325	8.92842	8.88047	8.82267	8.828
Borcs7	7.32946	7.1765	7.46806	7.34426	7.55425	7.52481	7.35877	7.31637	7.582	7.4268	7.86691	7.68985
Borcs8	8.18133	8.31311	8.36624	8.17987	8.26502	8.36642	8.41125	8.29144	8.17221	8.33137	8.01455	8.40371
Bpgm	9.74409	9.98055	9.96432	9.88154	9.72571	9.93238	10.0352	9.73899	10.1144	10.0215	10.4585	10.2673
Bphl	8.44478	8.48614	8.26975	8.22938	8.00474	7.93436	8.32174	8.38877	8.51669	8.43818	8.4966	8.60552
Bpnt1	11.8087	11.8554	11.8851	11.7665	11.5868	11.7278	12.0408	12.0654	11.9664	11.9312	11.8401	12.0155
Bptf	11.7605	11.5803	11.5221	11.4459	11.5335	11.4623	11.3385	11.0881	10.8109	10.763	10.3972	10.9395
Braf	9.95665	9.93326	9.91696	9.89814	10.1212	9.83952	9.90017	9.69047	9.79596	9.76981	9.36104	9.79975
Brap	10.446	10.449	10.4004	10.525	10.5121	10.4604	10.5173	10.4749	10.4822	10.4311	10.2166	10.3422
Brat1	8.87239	8.84591	8.72436	8.7306	8.71781	8.62283	8.60405	8.67646	8.37589	8.30213	8.14806	8.31418
Brca1	11.2929	11.2752	11.382	11.4967	11.2989	11.2859	11.5093	11.5081	11.8095	11.8762	11.7661	11.7934
Brca2	9.73081	9.531	9.57985	9.52131	9.64505	9.46774	9.58673	9.44534	9.34469	9.38606	8.90754	9.20493
Brcc3	9.94648	9.8286	9.91529	9.83487	9.86064	9.92683	10.1377	10.1795	10.4768	10.5374	10.6975	10.603
Brd1	10.9028	10.8862	10.8223	10.7235	10.6782	10.7306	10.649	10.614	10.2717	10.1785	10.046	10.3
Brd2	12.7346	12.7512	12.8376	12.7392	12.6654	12.6762	12.5798	12.546	12.4731	12.3648	12.2236	12.4412
Brd3	11.0387	10.9899	10.8659	11.0553	11.0059	10.9349	10.8978	10.7581	10.5406	10.6021	10.2213	10.4922
Brd4	12.4765	12.4293	12.3836	12.3845	12.4041	12.2963	12.2523	12.0943	11.8802	11.9086	11.7661	12.0509
Brd7	10.7534	10.8071	10.8214	10.8144	10.7125	10.6664	10.8097	10.7463	10.7758	10.6344	10.4518	10.4626
Brd8	10.134	10.2563	10.2076	10.1511	9.89467	10.017	9.86172	9.98676	9.73111	9.76804	9.76461	9.87924
Brd9	9.91162	9.66835	9.80657	9.79405	9.51488	9.61648	9.83142	9.80429	9.77176	9.55941	9.32632	9.67697
Brdt	5.9479	5.98111	5.95651	5.96609	5.86428	6.23452	6.25188	6.2594	6.22975	6.03859	6.48061	6.27676
Brf1	9.7832	9.90249	9.90026	9.91455	9.84009	9.82766	9.93619	9.94188	9.93004	9.79428	9.68243	9.62069
Brf2	8.47005	8.68695	8.64998	8.49837	8.68344	8.68031	8.61483	8.57618	8.55797	8.71744	8.80592	8.64997
Bri3	10.1792	10.1706	10.1065	10.0383	10.4685	10.2446	10.1804	10.4382	10.4672	10.6295	10.8728	10.7807
Bri3bp	10.715	10.8603	10.7014	10.7953	10.757	10.8073	10.7446	10.7565	10.7964	10.7006	10.8312	10.9027
Bricd5	5.52305	5.57622	5.42999	5.3946	5.05844	5.39957	5.30369	5.05844	5.05844	5.31606	5.05844	5.05844
Brip1	10.0675	10.0051	10.1166	9.91047	10.09	10.1262	10.3902	10.4005	10.3508	10.3544	10.0119	10.047
Brix1	10.7075	10.8812	10.8426	10.8253	10.6401	10.7171	10.8578	11.0198	11.0792	11.1556	11.4334	11.4744
Brk1	11.5405	11.6695	11.8049	11.8302	11.5725	11.7499	11.5987	11.7051	11.9364	12.0785	12.2858	12.4209
Brms1	9.6749	9.89263	9.92523	10.032	9.80208	9.88312	9.78633	9.82091	9.93938	9.93614	10.2401	10.2181
Brms1l	9.17067	9.27659	9.08923	9.39819	9.19257	9.25157	9.31814	9.30398	9.40217	9.42917	9.47634	9.4054
Brox	10.2666	10.255	10.306	10.1785	10.2821	10.3195	10.2438	10.3389	10.3473	10.463	10.5762	10.4646
Brpf1	10.6334	10.7207	10.6702	10.6689	10.6282	10.6018	10.5815	10.4431	10.4618	10.3474	10.1944	10.3555
Brpf3	10.5326	10.4478	10.2713	10.299	10.3805	10.3131	10.172	10.1783	10.0484	10.0126	9.76461	10.0093
Brs3	8.81742	8.64427	8.64596	8.67358	8.99941	8.68362	8.96799	8.91	9.14084	9.19415	9.44433	9.2843
Brsk1	5.62626	5.83006	5.8804	5.76604	6.00214	6.00832	5.65564	5.69457	5.73133	5.73475	5.54955	6.20517
Brwd1	10.1954	10.0909	10.0394	9.981	10.1847	9.9652	10.1065	9.93079	9.92848	9.91876	9.86466	9.99937
Brwd3	10.6809	10.3778	10.1954	10.1875	10.4243	10.2939	10.5173	10.3546	10.2011	10.1705	9.67785	10.062
Bscl2	8.20742	8.23644	7.97881	8.00441	7.90261	7.9622	8.24951	8.04813	8.04939	8.14605	7.41452	7.74654
Bsdc1	8.57017	8.63241	8.72054	8.63093	8.48795	8.54484	8.49544	8.29144	8.33839	8.18405	7.88321	8.39936
Bsg	13.3136	13.2911	13.2705	13.2497	13.2725	13.3513	13.3259	13.4461	13.441	13.4998	13.7034	13.677
Bsn	7.6152	7.69856	7.46806	7.43382	7.20724	7.43063	7.03972	7.05072	7.06932	6.93757	6.88686	7.15537
Bst2	9.33979	9.49451	9.71592	9.44419	9.54855	9.73391	12.588	12.6218	12.676	12.6428	12.8529	12.9474
Btaf1	10.5678	10.3384	10.3136	10.4369	10.4718	10.5251	10.423	10.2636	10.1998	10.292	9.98809	10.2387
Btbd1	10.4904	10.5744	10.5459	10.4687	10.5995	10.4945	10.3974	10.5402	10.5395	10.5176	10.6411	10.4397
Btbd10	9.82127	9.84573	9.93838	9.91863	9.81662	9.72115	9.92906	9.94602	9.99416	10.0406	10.0318	9.87459
Btbd16	5.05844	5.05844	5.32153	5.46969	5.05844	5.29994	5.65564	5.30054	5.05844	5.05844	5.46007	5.30909
Btbd18	5.71273	5.42554	5.79556	5.6381	5.05844	5.39957	5.65564	5.30054	5.42043	5.68539	5.69046	5.55788
Btbd19	8.52616	8.42772	8.31118	8.52374	8.51758	8.42314	8.28609	7.98962	8.16685	8.33137	7.99973	8.53217
Btbd2	9.16188	9.26643	9.33315	9.30568	9.21872	9.20872	9.12649	9.16625	9.18871	9.24332	8.88778	8.79545
Btbd3	10.1396	10.2627	10.1108	10.3248	10.3788	10.3099	10.3308	10.321	10.5809	10.6325	10.6257	10.481
Btbd6	8.45927	8.54224	8.45194	8.68003	8.53055	8.58791	8.32174	8.26491	8.42141	8.28229	8.31234	8.21858
Btbd7	10.5069	10.5071	10.3198	10.3155	10.4966	10.3826	10.2835	10.2636	10.2693	10.2306	10.0264	10.1155
Btbd9	9.83788	9.70449	9.74241	9.73365	9.84912	9.82468	9.93049	9.83734	9.64998	9.69377	9.50249	9.63359
Btd	8.73967	8.8148	9.00088	8.79436	8.80827	8.94834	8.97357	8.94362	8.89027	8.89027	9.17186	8.94535
Btf3	13.3036	13.5346	13.5009	13.4712	13.2248	13.4239	13.6643	13.7896	13.8398	13.9886	14.3927	14.4482
Btf3l4	10.6038	10.7327	10.6878	10.586	10.5933	10.6447	10.7511	10.9133	10.8996	10.9726	11.3596	11.359
Btg1	7.94264	8.05741	8.11431	8.16143	8.25721	8.29434	8.08249	7.94547	8.29987	8.39273	8.29433	8.14236
Btg2	7.30472	7.4349	7.12748	7.17365	7.03598	7.28471	6.76214	6.82376	6.43458	6.48191	6.95384	6.42632
Btg3	9.98177	10.1222	10.1195	10.1336	10.0813	10.0833	10.2667	10.2845	10.6026	10.7326	11.152	11.0846
Btla	5.46124	5.57622	5.64353	5.29641	5.76728	5.29994	5.48222	5.95107	5.93397	5.6315	5.54955	5.61614
Btn2a2	5.88818	5.94603	7.42997	7.61068	7.13789	7.0464	5.8972	6.01062	7.45326	7.36992	6.98603	7.08891
Btrc	9.28426	9.3744	9.30547	9.39819	9.31136	9.32941	9.43571	9.35474	9.22742	9.07908	9.08097	9.17746
Bub1	11.0829	11.0435	10.9949	10.8965	11.0373	11.0836	11.1225	11.1985	11.2613	11.2764	11.4011	11.1641
Bub1b	11.6238	11.6335	11.6984	11.7307	11.6908	11.6656	11.582	11.5701	11.4747	11.2869	11.0209	11.2359
Bub3	12.1437	12.2193	12.2269	12.1779	12.0498	12.0884	12.053	12.1112	12.0702	12.1274	12.2481	12.2315
Bud13	9.21804	9.41633	9.43418	9.31396	9.21273	9.32308	9.31595	9.23111	8.90628	9.18887	9.22312	9.03998
Bud23	10.3992	10.3116	10.4856	10.4463	10.5529	10.614	10.4827	10.6355	10.5799	10.6584	10.9825	10.8774
Bud31	10.9557	11.0323	11.002	10.9156	10.8232	11.1259	11.1162	11.3117	11.3641	11.5571	12.1234	12.2056
Bysl	11.0512	11.141	11.1298	11.0815	11.2052	11.1949	11.0155	11.0699	11.0312	11.0274	11.0478	11.0188
Bzw1	13.7126	13.6192	13.6404	13.6428	13.8109	13.782	13.8222	13.9009	14.0616	14.1922	14.4503	14.2591
Bzw2	11.1087	11.1368	11.1942	11.2044	11.1023	11.1932	11.1997	11.2722	11.2438	11.2266	11.5266	11.4371
C030006K11Rik	8.55677	8.70215	8.67784	8.43863	8.48128	8.56294	8.49933	8.52139	8.29987	8.27227	8.0365	8.29088
C1d	9.62473	9.53734	9.71401	9.63305	9.58453	9.7777	9.94895	10.0001	10.1946	10.4814	10.9788	11.0752
C1galt1	11.0823	10.9682	10.8771	10.8631	11.1931	11.0232	11.1534	11.1604	11.3607	11.418	11.3837	11.2304
C1galt1c1	7.54751	7.57736	7.89208	7.63124	7.40298	7.92872	7.50926	7.87649	8.06678	7.95787	8.33599	8.06728
C1qbp	11.9447	12.0362	12.1563	12.0735	11.9841	12.1324	12.0777	12.1407	12.1352	12.124	12.3221	12.3841
C1ql1	6.50865	6.16562	6.23304	5.96609	5.8939	5.77636	6.07883	6.23731	5.85967	5.82336	6.20292	5.91518
C1ql3	7.45412	7.4901	7.66837	7.80964	8.23749	8.01095	7.46912	7.74035	7.76558	7.90657	8.20712	8.31879
C1qtnf1	5.46124	5.57622	6.05865	5.80351	5.76728	5.81435	5.40487	5.4768	5.62858	5.57167	5.46007	5.41247
C1qtnf12	5.05844	5.57622	5.42999	5.29641	5.28462	5.47576	5.30369	5.30054	5.31474	5.05844	5.05844	5.30909
C1qtnf5	6.39088	6.5714	6.76361	6.75725	6.58696	6.25657	6.35891	6.49281	6.45504	6.33207	6.76003	6.64242
C1qtnf6	11.2492	11.212	11.2427	11.1961	11.3129	11.2891	10.9938	11.0013	10.8303	10.8245	10.8094	10.8728
C1ra	7.08798	6.88233	7.53221	7.40998	7.34344	7.17103	8.03474	8.16789	8.77279	8.76087	8.68738	8.71763
C1rl	7.60193	7.55177	7.85722	7.72968	7.78689	7.86517	7.73466	7.71408	7.97139	7.93886	8.30636	7.87882
C1s1	6.05547	5.31837	6.30953	6.14968	6.28207	6.29924	5.8972	5.77812	6.41372	6.46175	6.55145	6.32177
C2	9.91292	9.79371	9.82261	9.78217	9.53901	9.72914	10.5539	10.4586	10.6211	10.608	10.4849	10.477
C2cd2	8.02845	7.68301	7.88518	7.90766	8.17246	7.95113	7.96841	7.87059	7.72194	7.97663	7.78239	7.72555
C2cd2l	11.1235	11.0988	10.929	10.919	10.9549	10.8943	10.9938	10.9604	10.6143	10.5832	10.4691	10.588
C2cd3	9.94265	9.77057	9.68894	9.65765	9.74518	9.66394	9.673	9.47239	9.40667	9.28345	8.99872	9.39244
C2cd4d	5.57734	6.13741	5.74887	5.58818	5.8939	5.05844	5.48222	5.77812	5.62858	5.78053	5.54955	5.66863
C2cd5	9.81709	9.6509	10.1195	9.92674	9.99217	10.017	9.60834	9.73102	9.90643	10.0508	9.94113	9.86681
C330007P06Rik	9.8799	9.91228	9.81015	9.70247	9.86446	9.87162	9.94046	10.0316	10.175	10.1063	10.3462	10.2756
C330018D20Rik	7.47625	7.50801	7.57625	7.24821	7.52133	7.37247	7.64463	7.67372	7.84892	8.07841	8.40467	8.53613
C330027C09Rik	11.6278	11.5721	11.6022	11.5821	11.6578	11.7733	11.6258	11.7892	11.9838	12.0566	12.2809	12.0523
C4a	5.38768	5.74071	5.69851	5.7263	5.37799	5.53977	5.65564	5.54096	5.56905	5.57167	5.54955	5.91518
C4b	5.38768	5.05844	5.51288	5.80351	5.05844	5.05844	7.03972	6.94835	7.09324	6.6825	6.76003	6.93179
C530008M17Rik	10.0174	10.0383	9.70827	9.77319	9.74103	9.66561	9.52556	9.28883	8.85107	8.84058	8.28828	9.06474
C77080	9.91292	9.88933	11.2327	11.205	11.3442	11.2993	9.69337	9.66892	10.7697	10.8287	10.7398	10.9313
C87436	8.43014	8.52521	8.55011	8.52732	8.56563	8.62628	8.47584	8.53989	8.37589	8.40194	8.50183	8.67527
C8g	5.9479	6.27074	5.83924	6.34213	6.02708	6.14086	6.29607	6.16781	5.89773	6.2355	6.5963	6.07223
Caap1	8.33502	8.63241	8.46573	8.47997	8.42677	8.75139	8.54891	8.7449	8.59412	8.9	8.83923	8.94238
Cab39	11.3192	11.1417	11.216	11.0918	11.2306	11.2052	11.225	11.1079	11.0911	10.9275	10.9723	11.0223
Cab39l	9.54266	9.54995	9.38215	9.43663	9.4887	9.51474	9.65061	9.79819	9.7735	9.92669	10.1187	9.86056
Cabin1	10.3168	10.3091	10.3361	10.2685	10.3982	10.3078	10.2835	10.1582	9.88242	10.0667	9.83824	10.0607
Cables1	6.23767	6.36573	5.83924	5.87287	6.20456	5.6466	5.93046	5.91954	5.8195	5.68539	5.46007	5.4915
Cables2	8.00873	7.8862	8.06046	7.9729	7.88228	8.14293	8.0239	7.87059	7.64597	7.7837	7.41452	7.85976
Cabp1	6.08035	6.36573	6.2592	6.10104	5.94986	6.0365	5.8972	6.19154	5.93397	6.0695	6.20292	6.12775
Cabp7	5.75169	5.31837	5.91939	5.76604	6.07487	5.59597	5.60425	5.5973	5.8195	5.4223	5.80393	6.10042
Cabyr	5.71273	5.31837	5.05844	5.6381	5.44941	5.73606	5.05844	5.30054	5.77688	5.6315	5.7497	5.71672
Cacfd1	9.29634	9.23812	8.93331	9.16844	9.08727	9.09191	9.03351	9.07323	8.86097	8.83383	8.98392	8.89404
Cachd1	7.36173	7.47195	7.49593	7.32731	7.52133	7.36395	7.15844	6.90001	6.87386	6.6825	7.10715	6.96983
Cacna1a	6.57066	6.71241	6.66162	6.36139	6.73149	6.55708	6.22902	6.57683	6.43458	6.44121	6.26489	6.52152
Cacna1c	8.24567	8.14418	8.23786	8.03014	8.00474	8.05291	7.98529	7.73383	7.71453	7.82589	7.39147	7.65319
Cacnb1	6.05547	5.90932	5.58246	6.10104	5.94986	5.88466	5.93046	5.8523	5.31474	5.93837	5.46007	5.66863
Cacnb3	7.90035	7.79557	7.93945	7.92975	8.00474	8.00562	8.00197	7.88237	7.63026	7.7104	7.75599	7.5124
Cacnb4	6.69892	6.49374	6.44721	6.14968	6.30054	6.47193	6.57851	6.67005	6.58844	6.61359	6.50473	6.75183
Cacng7	7.05813	7.32737	7.2766	7.25724	7.43888	7.32932	6.73347	6.71398	6.64109	6.28495	6.63945	6.87918
Cacng8	5.88818	6.01473	5.8804	5.7263	5.73157	5.77636	5.8624	5.88668	5.93397	6.09935	6.10161	5.87968
Cactin	10.5121	10.8001	10.6089	10.6551	10.5887	10.4411	10.3566	10.3082	10.2519	10.1394	9.92384	10.1543
Cacul1	11.4373	11.3545	11.4592	11.3961	11.5968	11.5347	11.5226	11.4789	11.4185	11.5417	11.553	11.5148
Cacybp	12.067	12.1024	12.0983	12.079	12.1379	12.2071	12.3457	12.4897	12.6965	12.7974	13.0043	13.0165
Cad	13.0001	12.8751	12.8688	12.8843	12.9527	12.8239	12.6305	12.2858	12.0776	12.1899	11.8211	12.4022
Cadm1	11.8313	11.9036	11.7365	11.7563	11.7911	11.8717	12.4088	12.3731	12.3248	12.2533	12.2593	12.442
Cadm2	5.71273	5.31837	5.32153	5.05844	5.50944	5.69301	5.05844	5.77812	5.31474	5.05844	5.69046	5.05844
Cadm4	10.4232	10.5327	10.615	10.6478	10.7794	10.8148	10.2746	10.1969	10.0698	9.93928	10.0443	10.1759
Cage1	5.9479	5.57622	5.8804	6.14968	5.60969	5.59597	5.78732	5.88668	5.8195	5.6315	5.54955	5.66863
Calcoco1	8.80616	9.04057	8.9691	8.97016	9.00868	8.86641	9.00658	8.7289	8.45243	8.5623	8.49135	8.68598
Calcrl	7.09777	6.86783	6.79575	6.88422	7.09257	6.76629	7.10583	7.08308	7.37919	7.16041	7.47046	7.40073
Cald1	11.6854	11.7219	11.8407	11.8026	12.0759	12.1479	11.4871	11.4232	11.5354	11.5495	11.8604	11.715
Calhm2	7.76515	7.8862	7.85014	7.87954	7.89756	8.03209	7.7743	7.79142	7.47115	7.576	7.5554	7.65319
Calm1	14.0371	14.0041	14.0252	14.0969	14.1501	14.1193	14.1109	14.2826	14.3449	14.4492	14.6137	14.4998
Calm2	13.0231	13.1951	13.1856	13.0735	12.8713	13.1005	13.168	13.226	13.2862	13.3967	13.6426	13.7187
Calm3	13.0778	13.1889	13.1215	13.3166	13.2306	13.2084	13.1649	13.1796	13.096	13.0488	12.9511	13.044
Calml4	5.71273	5.50745	5.58246	5.68385	5.6937	5.53977	5.74643	5.30054	5.56905	5.4223	5.69046	5.94911
Calr	14.8988	14.9944	15.1577	15.098	14.9742	15.0927	15.0697	15.1227	15.275	15.3048	15.4707	15.3618
Calr3	6.05547	6.01473	5.79556	6.10104	6.07487	6.18885	5.93046	5.77812	6.30271	6.3771	6.32319	6.34354
Calu	13.4864	13.4667	13.52	13.623	13.5249	13.5814	13.4908	13.4922	13.5091	13.4167	13.3552	13.2905
Camk1	9.80869	9.9929	10.0455	9.95875	10.0813	10.0657	9.76084	9.9706	9.77176	9.92669	10.2859	10.1872
Camk2a	5.67111	5.63658	5.83924	5.87287	6.00214	6.0365	5.40487	5.8523	5.62858	5.31606	5.7497	5.84239
Camk2b	6.45974	6.24551	6.05865	5.93625	6.16333	6.18885	5.93046	6.0927	6.15082	6.2098	6.06516	6.25348
Camk2d	10.5711	10.5306	10.4367	10.3947	10.6861	10.5711	10.4895	10.448	10.4302	10.3938	10.3303	10.4677
Camk2g	9.7587	9.89428	9.83848	9.89814	9.81793	9.92683	9.77045	9.72461	9.65943	9.69934	9.86868	9.76333
Camk2n1	7.71082	8.11585	7.72391	7.80964	7.61778	7.7861	7.60836	7.72728	7.45326	7.74754	7.44837	7.50413
Camk2n2	7.77106	7.99018	7.86426	8.17068	7.81943	7.83529	7.5559	7.74684	7.70708	7.67222	7.61578	7.70424
Camk4	5.88818	5.63658	5.58246	5.83903	5.37799	5.53977	5.65564	5.69457	5.62858	5.4223	5.69046	5.4915
Camkk1	6.42587	6.60831	6.58829	6.48715	6.49965	6.23452	6.29607	6.49281	6.43458	6.26054	6.06516	6.20517
Camkk2	9.94648	9.98519	9.77209	9.91727	9.92181	9.88884	9.81912	9.88123	9.7735	9.62719	9.52561	9.74986
Camkmt	6.49259	6.85316	6.62554	6.61511	6.45326	6.60521	6.33839	6.47521	6.80118	6.44121	6.5741	6.36486
Caml	8.95363	8.91921	9.02271	8.92481	8.68344	9.10674	9.12899	9.12538	9.30906	9.57766	9.98994	9.80301
Camsap1	10.7277	10.6475	10.6303	10.6857	10.7928	10.6396	10.4914	10.3536	10.1868	10.3163	10.1103	10.1696
Camsap2	10.7915	10.6475	10.5996	10.5619	10.6854	10.6001	10.5778	10.5181	10.3285	10.2383	9.9373	10.1696
Camsap3	6.57066	6.67873	6.71371	6.61511	6.815	6.69581	6.54483	6.51013	6.53322	6.30879	6.72119	6.32177
Camta1	7.08798	7.28601	7.32972	7.34426	7.18167	7.09981	7.42775	7.48349	7.55722	7.51655	7.9388	7.97034
Camta2	8.59003	8.38582	8.45655	8.52014	8.52732	8.4271	8.65365	8.17743	8.2802	8.20002	7.88321	8.22843
Cand1	11.7171	11.5309	11.5566	11.5169	11.7594	11.6293	11.6486	11.4964	11.418	11.3953	11.147	11.2645
Cand2	10.8486	10.6793	10.825	10.8432	10.8977	10.8349	10.6568	10.4274	10.4553	10.4857	10.1847	10.4376
Cant1	10.8175	10.7807	10.8771	10.868	10.9138	10.7974	10.7973	10.7368	10.6182	10.6178	10.4731	10.6336
Canx	14.3649	14.337	14.4227	14.4488	14.4634	14.4916	14.3672	14.3351	14.4748	14.4005	14.3679	14.2448
Cap1	12.0377	12.1035	12.0776	12.0603	12.1305	12.1139	12.1524	12.2196	12.1277	12.0824	11.9437	11.8777
Capg	9.48581	9.54156	10.1253	10.0946	10.1528	10.33	9.49494	9.56865	10.0469	10.1758	10.6952	10.4502
Capn1	8.37001	8.12725	8.29579	8.08021	8.2882	7.99489	8.54139	8.36817	8.3096	8.20531	7.98475	8.40371
Capn10	9.26799	9.23552	9.29014	9.34865	9.29254	9.22918	9.40515	9.28229	9.29941	9.20202	9.32045	9.16988
Capn12	5.71273	5.57622	5.32153	5.6381	6.12018	5.59597	5.48222	5.05844	5.05844	5.05844	5.69046	5.4915
Capn15	9.35142	9.43684	9.45722	9.43663	9.4451	9.48861	9.39066	9.12049	9.21206	9.18623	8.90754	9.22945
Capn2	11.4576	11.4555	11.4379	11.311	11.4581	11.3781	11.3114	11.1892	11.045	10.8769	10.7199	10.9179
Capn5	6.87424	6.89666	6.74721	6.61511	6.82648	7.01325	6.95795	6.84971	6.96888	7.2376	6.5963	7.06597
Capn6	7.20086	7.19915	7.03943	6.88422	6.55861	6.5238	7.02835	6.94835	6.45504	6.6312	5.94538	6.42632
Capn7	9.47522	9.34816	9.26161	9.49606	9.50675	9.52763	9.33338	9.42569	9.47254	9.26352	9.0775	9.15459
Capns1	12.1974	12.3488	12.4314	12.3038	12.1003	12.251	12.1017	12.0859	11.9898	11.8725	11.7444	11.9843
Capns2	5.71273	5.05844	5.32153	5.3946	5.44941	5.29994	5.30369	5.4768	5.9686	5.4223	5.69046	5.61614
Caprin1	14.166	14.0581	13.98	14.0257	14.1224	14.1155	14.2133	14.2175	14.1517	14.1076	13.9173	13.9026
Caprin2	8.0382	7.79557	7.91258	7.95688	7.86683	7.70221	7.63745	7.83461	8.07826	7.67994	7.6059	7.82741
Capza1	12.4131	12.3685	12.3072	12.4064	12.3908	12.4155	12.5044	12.6192	12.7209	12.8612	13.0887	12.9573
Capza2	12.2234	12.1383	12.3267	12.2211	12.3189	12.3575	12.2602	12.3761	12.5937	12.7655	13.0428	12.9406
Capzb	12.2089	12.2766	12.3512	12.3553	12.3663	12.3459	12.3446	12.3462	12.3351	12.3341	12.3757	12.2937
Car11	6.17348	6.07822	6.28468	5.83903	6.20456	6.34017	6.13167	5.91954	6.0018	6.03859	5.69046	6.18007
Car12	6.47629	5.98111	6.35748	6.10104	6.45326	6.0365	6.27422	6.36309	6.15082	5.82336	5.85417	6.20517
Car13	9.70086	9.54785	9.80657	9.81897	9.93034	9.87162	9.95317	10.0419	10.345	10.3296	10.5552	10.4871
Car14	12.3703	12.5131	12.3088	12.3354	11.8375	12.0353	12.4643	12.4342	12.1507	12.0628	12.0129	12.0417
Car5a	5.38768	5.50745	5.32153	5.3946	5.28462	5.53977	5.30369	5.88668	5.31474	5.6315	5.05844	5.61614
Car5b	6.00343	6.21962	6.17848	5.90522	5.92239	6.0365	6.05118	5.95107	6.06449	5.86371	5.94538	6.15428
Car6	11.2445	11.4754	11.2831	11.3627	11.0418	11.154	11.0382	11.2214	10.8494	10.9954	11.1894	11.0623
Car7	5.52305	5.42554	5.79556	5.80351	5.28462	5.59597	5.60425	5.30054	5.42043	5.73475	5.69046	5.91518
Car8	6.52448	6.3428	6.38064	6.32251	6.28207	6.71025	6.61121	6.67005	6.58844	6.64856	7.06307	7.14453
Car9	6.55548	6.62632	6.73058	6.47006	6.24409	6.45408	6.41815	6.72827	6.34856	6.55904	6.35112	6.44604
Card10	6.02985	6.19301	6.09014	5.83903	5.94986	5.88466	5.82586	5.95107	5.50121	5.4223	5.69046	5.71672
Card14	8.59986	8.75048	8.59258	8.76132	8.46108	8.60198	8.71165	8.67646	8.39884	8.46477	8.72355	8.52024
Card19	8.67304	8.783	9.04421	8.97278	8.5844	8.83999	8.7447	8.71597	8.84775	8.5623	8.76749	8.79215
Card6	8.81742	8.67928	8.72436	8.72437	8.663	8.79179	8.77699	8.58332	8.46985	8.40194	8.20712	8.34164
Carf	7.72308	7.47195	7.51419	7.48025	7.92265	7.41427	7.57109	7.56725	7.85564	7.90003	7.93099	7.84691
Carhsp1	9.49282	9.46818	9.15562	9.29943	9.4887	9.41717	9.16108	9.46086	9.30906	9.34637	9.40329	9.39244
Carm1	11.5141	11.4748	11.4569	11.4203	11.553	11.425	11.2555	11.3176	11.1262	11.1468	10.7031	11.0596
Carmil1	7.40101	7.69081	7.25474	7.52514	7.66056	7.58413	7.38505	7.32525	7.59828	7.58428	7.57583	7.68985
Carmil2	8.44842	8.45498	6.4685	6.8721	6.35398	6.21196	8.18797	8.28705	6.47511	6.61359	6.37832	6.07223
Carmil3	6.65773	6.67873	7.05239	7.23912	7.3204	6.9792	6.94582	6.49281	7.05719	7.31049	6.83412	6.86567
Carnmt1	9.67952	9.56244	9.53291	9.61641	9.80341	9.76221	9.63491	9.69376	9.84647	9.78907	9.86265	9.75155
Carns1	7.15502	7.11808	7.02634	6.85986	6.93564	6.62082	6.83096	6.84971	6.58844	6.33207	6.76003	6.57493
Cars	10.9913	11.1927	11.2473	11.3042	11.3891	11.3617	11.0122	11.1238	11.1518	11.1194	11.0557	10.9926
Cars2	9.07798	9.35056	9.14429	9.17073	9.18033	9.22012	9.14636	9.20828	9.40442	9.45134	9.7006	9.34164
Casc1	5.2915	5.31837	5.05844	5.53278	5.50944	5.47576	5.30369	5.5973	5.05844	5.31606	5.69046	5.66863
Casc3	10.5794	10.5998	10.6171	10.6289	10.5576	10.5666	10.4885	10.3639	10.3154	10.1745	9.99178	10.1683
Casc4	10.4956	10.3202	10.1339	10.0994	10.1486	10.1238	10.2519	10.2278	10.0992	9.97642	10.0137	9.98507
Casd1	11.1684	11.1759	11.0306	11.1338	11.1911	11.0584	11.0742	11.098	11.1371	11.1522	11.0451	11.0139
Cask	9.07798	8.94176	8.90671	8.86391	9.05412	8.88662	8.79287	8.87266	9.03711	8.75014	8.55808	8.67885
Caskin1	6.00343	5.83006	5.83924	5.83903	5.86428	5.6466	5.70274	5.40042	5.62858	5.78053	5.7497	5.4915
Caskin2	9.43574	9.44136	9.39414	9.49788	9.61662	9.50173	9.16352	9.15912	9.24764	8.9725	8.81013	9.195
Casp1	5.52305	5.42554	5.79556	5.68385	5.05844	5.59597	5.48222	5.5973	5.50121	5.57167	5.69046	5.71672
Casp12	5.05844	5.50745	5.69851	5.80351	5.50944	5.77636	6.52761	6.52718	7.44422	7.40811	8.22627	8.15794
Casp2	9.98301	10.0127	10.08	10.0495	10.0164	10.1831	10.1203	10.0535	10.1117	10.2242	10.1069	10.0303
Casp3	10.4103	10.5998	10.5427	10.5843	10.5701	10.5397	10.6858	10.7005	10.9605	10.9695	11.2902	11.0335
Casp4	5.2915	5.78687	6.12055	6.4527	6.64162	6.41746	5.60425	5.73772	7.41674	7.39866	8.12099	8.0168
Casp6	8.04789	8.31311	8.10843	8.13802	7.89756	8.29434	8.13371	8.10929	8.12326	8.24176	8.42685	8.42095
Casp7	7.29637	7.55177	7.47741	7.33581	7.59903	7.44679	8.68124	8.59751	8.68626	8.74654	8.84334	8.79545
Casp8	10.3973	10.4942	10.6037	10.5374	10.3635	10.4401	10.6671	10.7159	10.7697	10.7585	10.9277	10.7198
Casp8ap2	10.2167	10.059	10.0102	9.81897	10.047	10.0026	10.1537	10.1123	10.1564	9.97183	9.80505	9.816
Casp9	8.77186	8.46842	8.5587	8.60063	8.8553	8.60198	8.85769	8.89862	8.70839	8.59471	8.2514	8.52024
Casq1	6.05547	5.50745	5.42999	5.46969	5.65326	5.81435	5.40487	5.4768	5.05844	5.05844	5.7497	5.30909
Casq2	6.15107	5.74071	5.8804	5.46969	5.6937	5.73606	6.05118	5.5973	5.73133	5.50349	5.69046	5.91518
Cast	9.59083	9.54785	9.65747	9.72125	9.58453	9.64549	9.60117	9.77512	9.61543	9.53885	9.38091	9.33488
Casz1	6.76452	6.55249	6.64372	6.67406	6.60087	6.37953	6.79014	6.56052	6.39245	6.3771	6.61808	6.42632
Cat	10.6111	10.6337	10.5545	10.4807	10.5787	10.643	10.6628	10.6558	10.5075	10.4685	10.3986	10.4058
Catsper2	5.78843	5.90932	5.83924	5.68385	5.83342	5.69301	5.74643	5.69457	5.77688	5.6315	5.34289	6.15428
Catsperd	5.2915	5.69093	5.42999	5.6381	5.50944	5.53977	5.60425	5.5973	5.77688	5.6315	5.98726	6.20517
Cav1	7.60858	7.91293	7.72391	7.46495	7.50794	7.33806	7.63745	7.75973	7.54885	7.6409	7.33204	7.5689
Cav2	10.7629	10.6436	10.614	10.3995	10.5826	10.7868	10.706	10.7667	11.065	11.2875	11.6343	11.6608
Cavin1	10.1318	10.0487	10.0741	10.1383	10.1297	10.1502	10.0797	9.96653	9.79081	9.78733	9.68699	9.83207
Cavin2	10.4825	10.3517	10.2465	10.1694	10.2259	10.23	10.4591	10.626	10.5759	10.666	10.7076	10.6244
Cavin4	5.38768	5.31837	5.42999	5.05844	5.28462	5.39957	5.05844	5.30054	5.56905	5.05844	5.05844	5.05844
Cbarp	6.98565	7.12998	7.03943	6.83501	7.08331	6.96764	6.57851	7.00624	6.73972	6.6825	6.77898	6.52152
Cbfa2t2	10.1573	10.0924	9.90193	10.0777	10.3427	10.1335	10.1315	9.99743	10.0164	9.92511	9.86667	9.8079
Cbfa2t3	5.46124	5.42554	5.42999	5.53278	5.56216	5.47576	5.48222	5.05844	5.42043	5.05844	5.05844	5.05844
Cbfb	11.3964	11.4649	11.3844	11.2728	11.2923	11.2832	11.4125	11.2956	11.4113	11.2514	11.0923	11.1704
Cbl	10.7929	10.5007	10.3921	10.3631	10.5218	10.4498	10.4251	10.1934	9.93627	10.2522	9.75594	10.3677
Cblb	8.27061	7.9839	8.02337	8.07034	8.15572	8.12832	7.98529	7.83461	7.59828	7.58428	7.62559	7.79429
Cbll1	9.42661	9.44361	9.43882	9.43663	9.25611	9.43683	9.42356	9.3211	9.1543	9.09891	9.1187	9.03721
Cbr1	8.53302	8.71345	8.86239	8.80324	8.32973	8.60548	8.73486	8.64949	8.78325	8.96015	9.29972	9.4054
Cbr3	8.36231	8.48173	8.57574	8.60063	8.24145	8.30301	8.54516	8.66641	8.87406	9.0415	8.99504	8.9601
Cbr4	7.74728	7.8099	8.14336	7.87385	7.97632	7.93436	8.24487	8.15829	8.24512	8.48655	8.47018	8.36412
Cbs	6.61503	6.04706	6.05865	5.90522	6.0513	6.06377	6.10564	6.11843	5.93397	6.00652	5.54955	5.71672
Cbwd1	9.15968	8.91921	9.15562	9.08853	9.14299	9.17865	9.19485	9.35474	9.38403	9.44694	9.58553	9.39894
Cbx1	11.0249	11.2093	11.2294	11.3466	11.1896	11.2826	11.2209	11.3952	11.4323	11.2746	11.3865	11.3512
Cbx2	9.33199	9.27406	9.22983	9.34664	9.40189	9.40324	9.08848	9.09581	8.73018	8.94457	8.70105	8.82478
Cbx3	13.4134	13.1998	13.2612	13.3335	13.4824	13.4077	13.3712	13.4011	13.5738	13.5739	13.5585	13.3638
Cbx4	10.3178	10.2239	10.4286	10.143	10.4043	10.3896	10.2242	10.1771	10.2901	10.153	9.99914	10.2169
Cbx5	12.883	12.7535	12.5705	12.4954	12.7166	12.7247	12.7532	12.6854	12.5057	12.5311	12.5113	12.6076
Cbx6	12.4408	12.3329	12.2538	12.3974	12.607	12.4363	12.3569	12.2372	12.1676	12.0975	11.7731	11.9943
Cbx7	7.51235	7.75164	8.02962	8.2338	8.43023	8.37055	7.50926	7.59646	7.72931	8.00126	8.13459	8.05622
Cbx8	8.86428	8.75048	8.92339	8.74911	8.73189	8.89234	8.79287	8.97917	9.06874	8.93198	9.05644	9.02043
Cby1	9.3202	9.39551	9.36762	9.44796	9.40889	9.51843	9.49881	9.40978	9.73469	9.82346	10.2055	10.0607
Cc2d1a	9.91684	9.95552	9.89689	9.99264	10.0346	9.76998	9.76244	9.85359	9.94865	9.61152	9.40051	9.47057
Cc2d1b	10.4549	10.3953	10.4413	10.5295	10.4567	10.469	10.2757	10.2845	10.2481	10.1063	9.79451	10.1207
Cc2d2a	9.65004	9.59727	9.61509	9.48876	9.44339	9.42703	9.59216	9.37537	9.24009	9.28839	8.85966	9.08101
Ccar1	11.1771	11.1038	11.1284	11.096	11.112	11.0879	11.0593	11.006	10.7272	10.7162	10.4207	10.7016
Ccar2	10.125	10.132	10.0164	10.1774	10.0998	10.1202	9.98928	10.1391	10.0441	9.98403	9.95632	9.93685
Ccdc102a	8.35844	8.46842	8.21619	8.56968	8.44059	8.3202	8.18797	8.04292	8.07826	7.90003	8.01455	7.97623
Ccdc103	6.02985	5.87076	6.17848	6.21816	5.86428	6.18885	6.05118	5.88668	6.15082	6.2355	6.40483	5.87968
Ccdc106	5.05844	5.63658	5.05844	5.29641	5.28462	5.6466	5.40487	5.05844	5.31474	5.4223	5.46007	5.55788
Ccdc107	8.89114	9.08753	9.08923	8.99618	9.15763	9.1527	9.04415	9.19208	9.37945	9.57565	10.001	9.81277
Ccdc112	6.54009	6.62632	6.5692	6.61511	6.57287	6.50678	6.22902	6.60875	6.70776	6.12823	6.63945	6.64242
Ccdc115	9.42478	9.50749	9.8155	9.83343	9.63315	9.71954	9.56847	9.69211	9.8096	9.99463	10.1355	10.0957
Ccdc116	5.38768	5.31837	5.42999	5.58818	5.05844	5.47576	5.40487	5.05844	5.05844	5.31606	5.7497	5.30909
Ccdc117	9.95412	9.84573	9.86282	9.84347	9.9364	9.86148	10.0537	10.0738	10.2506	10.1785	10.226	10.1784
Ccdc12	9.10574	9.38147	9.33564	9.08611	8.9854	9.14315	9.27145	9.20828	9.11629	8.96634	9.09136	9.27491
Ccdc120	7.49802	7.70627	7.57625	7.95149	7.77033	8.01095	7.67996	7.82241	7.7584	7.3602	7.33204	7.41853
Ccdc122	7.12671	7.04428	7.54114	7.58276	7.70785	7.62698	7.23841	7.42735	7.89531	8.30704	8.50183	8.58658
Ccdc124	10.5884	10.8977	11.0152	11.0583	10.6512	10.7354	10.6201	10.7518	10.6611	10.5589	10.6793	10.6527
Ccdc125	6.21675	6.19301	5.8804	6.19588	6.22453	6.25657	6.15697	6.2147	6.06449	6.15623	6.43069	6.18007
Ccdc126	8.59659	8.24168	8.58839	8.39211	8.46785	8.71952	8.39045	8.52882	8.72295	8.57047	9.06349	9.05654
Ccdc127	10.2251	10.2002	10.1747	10.1383	10.1019	10.1878	10.4057	10.3263	10.4057	10.4879	10.5044	10.4636
Ccdc13	8.71881	9.09616	8.81666	8.88078	8.79761	8.66029	9.09361	9.21058	9.19654	9.2585	9.5307	9.57173
Ccdc130	7.63487	7.64334	8.00445	7.71055	7.7309	7.93436	7.97968	7.82241	7.94649	7.86682	8.0864	7.75346
Ccdc134	8.33108	8.38109	8.29579	8.22496	8.28051	8.03732	8.18797	8.1389	8.06678	8.3881	8.16802	8.2576
Ccdc136	8.24986	7.79557	8.13181	8.25133	8.37368	8.21378	7.97968	7.96772	8.02585	7.89345	7.98475	8.0225
Ccdc137	10.2146	10.2226	10.3236	10.222	10.0944	10.182	10.3068	10.3556	10.4291	10.3984	10.5527	10.4502
Ccdc138	7.18271	7.03155	7.15157	6.8475	6.94604	6.66639	7.05098	7.03974	7.00749	6.89627	6.83412	7.20825
Ccdc14	8.10001	7.87264	8.14336	8.24259	8.27279	8.05806	8.04012	8.13401	8.2802	8.19472	8.00716	8.07826
Ccdc141	8.58674	8.55488	8.62974	8.48367	8.45769	8.63657	9.0228	9.14476	8.87406	8.91927	8.8798	9.03442
Ccdc142	6.49259	7.18787	7.34009	6.75725	6.768	6.7799	6.5618	6.62439	6.78611	6.76329	6.63945	7.31757
Ccdc148	6.05547	5.69093	5.69851	5.46969	5.73157	5.94891	6.02261	6.2147	5.8195	5.78053	5.80393	6.12775
Ccdc149	7.45412	7.2324	7.18688	7.29274	7.10176	7.16109	7.0732	7.19522	7.42596	7.18294	6.85195	7.04261
Ccdc15	8.67304	8.67928	8.55011	8.4538	8.48462	8.49287	8.55265	8.67311	8.34313	8.50373	8.42685	8.61677
Ccdc151	5.52305	5.57622	5.83924	5.58818	5.56216	5.59597	5.70274	5.5973	5.50121	5.78053	5.05844	5.71672
Ccdc157	7.3376	7.05688	7.22125	7.51034	7.43178	7.29376	7.41932	7.39418	7.60635	7.55084	7.34414	7.41853
Ccdc159	6.23767	6.07822	5.83924	5.58818	5.94986	5.94891	5.99303	6.19154	6.03372	6.00652	6.20292	6.0431
Ccdc160	5.78843	5.87076	5.79556	5.7263	5.50944	5.59597	5.40487	5.64805	5.56905	5.31606	5.69046	5.66863
Ccdc166	5.52305	5.31837	5.32153	5.46969	5.05844	5.29994	5.05844	5.05844	5.56905	5.05844	5.34289	5.05844
Ccdc167	8.34287	8.61643	8.72436	8.62425	8.38803	8.58791	8.3479	8.66641	8.76929	8.81679	9.35244	9.27962
Ccdc169	5.05844	5.05844	5.32153	5.6381	5.05844	5.29994	5.30369	5.4768	5.31474	5.05844	5.34289	5.05844
Ccdc17	5.46124	5.31837	5.32153	5.05844	5.05844	5.29994	5.40487	5.54096	5.31474	5.31606	5.34289	5.71672
Ccdc171	6.86253	6.55249	6.42548	6.56882	6.61462	6.54056	6.83096	6.23731	6.70776	6.61359	6.52834	6.65869
Ccdc173	6.25815	6.38817	6.14997	6.36139	6.02708	6.39866	6.35891	6.30217	6.57033	6.1834	6.13664	6.12775
Ccdc174	9.93495	9.80951	10.0455	9.95214	9.95085	10.0326	9.96298	10.0067	10.0252	10.1598	10.1438	9.94426
Ccdc18	7.19182	6.79263	7.20989	7.22997	7.14676	7.28471	7.19904	7.03974	7.15115	7.44524	7.33204	7.10023
Ccdc181	8.1681	7.69081	8.01709	8.15211	8.15572	8.14777	8.21671	8.14377	8.25523	8.4292	8.49135	8.44222
Ccdc183	5.57734	5.50745	5.05844	5.29641	5.05844	5.39957	5.40487	5.30054	5.42043	5.05844	5.05844	5.30909
Ccdc186	9.72189	9.69507	9.53291	9.57224	9.7313	9.67557	9.92189	9.64705	9.71125	9.72321	9.63597	9.59265
Ccdc189	6.17348	5.74071	6.35748	5.96609	6.14201	6.0365	6.13167	6.11843	5.56905	6.03859	6.20292	6.36486
Ccdc191	7.17355	7.2324	7.59347	7.42592	7.40298	7.0464	7.33195	7.34282	7.56553	6.82419	7.00182	7.01881
Ccdc22	9.68412	9.7213	9.71974	9.88015	9.78067	9.77924	9.63666	9.79972	9.82144	9.83024	10.0794	9.85899
Ccdc24	5.85645	5.57622	5.42999	5.6381	5.56216	5.77636	5.65564	5.54096	5.50121	5.82336	5.54955	5.30909
Ccdc25	9.54772	9.54366	9.45722	9.40014	9.57834	9.55846	9.90308	9.89271	10.167	9.93614	10.1288	10.0538
Ccdc28a	6.80221	6.82327	7.02634	6.94308	6.94604	7.03545	7.12713	7.18542	7.11671	7.17172	7.63533	7.67531
Ccdc28b	6.19536	5.90932	6.20615	6.14968	5.94986	6.29924	6.02261	5.88668	6.06449	5.97316	6.2344	6.20517
Ccdc30	5.52305	5.50745	5.05844	5.58818	5.28462	5.47576	5.40487	5.30054	5.42043	5.57167	5.46007	5.4915
Ccdc32	8.52616	8.63241	8.56298	8.6768	8.48128	8.66699	8.65365	8.70946	8.9378	9.08477	9.31456	9.26546
Ccdc34	9.61673	9.73791	9.79396	9.68662	9.67147	9.72275	9.59216	9.82541	9.84647	9.72503	9.78177	9.77834
Ccdc38	5.38768	5.74071	5.32153	5.29641	5.50944	5.53977	5.5472	5.54096	5.05844	5.31606	5.94538	5.80306
Ccdc39	6.21675	6.19301	6.23304	6.36139	5.92239	5.97916	6.29607	6.19154	6.41372	6.33207	6.29446	6.10042
Ccdc40	9.01594	8.92569	9.11848	8.99101	8.96174	8.95109	8.73486	8.90716	8.86753	8.77506	8.69196	8.67169
Ccdc43	9.78748	9.64895	9.72164	9.80289	9.71446	9.83508	9.86471	9.88267	9.91434	9.97029	10.0407	10.062
Ccdc47	12.0223	11.8663	11.8503	11.797	11.7901	11.7962	11.8838	11.8588	11.7307	11.698	11.6531	11.6326
Ccdc50	11.2289	11.0995	11.2038	11.1156	11.2656	11.1972	11.2697	11.2907	11.4218	11.5581	11.6938	11.5281
Ccdc51	8.25819	8.13292	8.49292	8.44624	8.24145	8.47767	8.26334	8.35985	8.57415	8.60668	8.99504	8.48791
Ccdc57	7.65426	7.8099	7.50509	7.83919	7.77588	7.81091	7.65177	7.84671	7.44422	7.75485	7.61578	7.58462
Ccdc58	8.60312	8.57569	8.68177	8.64748	8.55615	8.67699	8.29509	8.53621	8.9031	9.09609	9.33508	9.47672
Ccdc59	8.86428	8.89959	9.04726	8.9649	8.78146	8.77639	8.99017	9.31684	9.10247	9.23822	9.46575	9.4225
Ccdc6	10.4585	10.325	10.374	10.4293	10.5903	10.5038	10.4352	10.257	10.2456	10.4176	10.1912	10.1922
Ccdc60	5.05844	5.05844	5.42999	5.05844	5.44941	5.29994	5.30369	5.05844	5.05844	5.31606	5.46007	5.30909
Ccdc61	8.50538	8.55488	8.62157	8.54866	8.28051	8.45067	8.23555	8.27381	7.98978	8.19472	7.89932	8.27671
Ccdc62	6.17348	6.13741	5.99197	6.0496	6.00214	5.88466	5.8624	5.8162	6.06449	5.93837	6.32319	6.32177
Ccdc63	5.2915	5.42554	5.32153	5.58818	5.56216	5.29994	5.05844	5.5973	5.31474	5.50349	5.54955	5.30909
Ccdc65	5.9479	5.87076	5.42999	5.90522	6.00214	5.91745	5.60425	5.73772	5.77688	5.68539	6.02711	5.98165
Ccdc66	8.16366	8.02114	8.01709	7.99399	7.9906	7.98408	7.88079	8.17267	8.01393	7.86682	7.6059	8.13188
Ccdc69	7.66703	7.67517	7.82869	7.91321	7.81406	7.7861	7.67296	7.69405	7.93387	7.87352	8.17462	8.05066
Ccdc71	9.77603	9.62929	9.77393	9.80876	9.7507	9.72595	9.63315	9.72139	9.70213	9.64845	9.67556	9.64274
Ccdc71l	8.31121	8.45048	8.45655	8.57315	8.11298	8.42314	8.06675	7.97871	8.11214	8.28229	8.0864	8.42095
Ccdc73	6.21675	5.98111	5.8804	6.14968	5.83342	6.11589	6.25188	5.73772	6.0018	5.93837	6.10161	6.36486
Ccdc74a	6.00343	6.04706	6.2592	6.0757	6.12018	6.16516	6.13167	6.16781	6.15082	5.93837	5.98726	6.44604
Ccdc77	8.44478	8.69837	8.82734	8.94098	8.52083	8.70657	8.64317	8.67979	8.9031	8.8739	8.94242	8.92444
Ccdc80	7.80597	7.65934	7.55	7.61757	7.87715	8.1717	7.72118	7.55984	7.28041	7.43605	7.87508	7.80764
Ccdc82	8.08599	8.00265	7.91935	7.72968	7.99533	7.90595	8.10321	8.11427	8.16685	7.79791	7.82529	7.82741
Ccdc84	6.65773	6.79263	7.06522	6.8475	6.92514	7.002	7.21887	6.68488	7.30077	7.02893	7.645	7.61552
Ccdc85b	7.49802	7.91954	7.54114	7.60375	7.46693	7.64791	7.52498	7.33406	7.31083	7.70285	7.5136	7.45343
Ccdc85c	10.6207	10.6484	10.4016	10.6841	10.6101	10.4343	10.6697	10.531	10.5769	10.6421	10.1171	10.2459
Ccdc86	9.20954	9.50749	9.51326	9.51234	9.47041	9.62679	9.39482	9.37332	9.42897	9.33925	9.36675	9.37717
Ccdc88a	9.87589	9.59322	9.62326	9.57396	9.91569	9.7591	9.66099	9.45118	9.67816	9.4403	9.33799	9.61327
Ccdc88b	5.2915	5.50745	5.05844	5.29641	5.37799	5.59597	5.60425	5.4768	5.05844	5.31606	5.34289	5.30909
Ccdc88c	9.36103	9.17435	9.0503	9.08853	9.05188	9.14315	8.86371	8.90716	8.57415	8.57454	8.37646	8.47971
Ccdc9	9.76884	9.71385	10.0303	9.94683	9.99798	9.86148	9.68492	9.65213	9.53347	9.46231	9.32632	9.55439
Ccdc90b	8.48074	8.65213	8.79141	8.74297	8.71214	9.04393	8.97078	8.91848	9.21463	9.55737	9.97323	9.86056
Ccdc91	9.91423	9.92361	10.368	10.499	10.4983	10.3724	10.1402	10.056	10.5252	10.5374	10.5577	10.2826
Ccdc92	8.25819	8.32302	8.17182	8.38816	8.55615	8.47767	8.17338	8.06882	7.87561	7.99514	7.86691	8.23334
Ccdc93	10.6916	10.7574	10.8126	10.7039	10.7453	10.7243	10.6926	10.6026	10.6441	10.6411	10.5134	10.6599
Ccdc94	8.55003	8.55906	8.71287	8.84397	8.60905	8.55573	8.42768	8.35567	8.59015	8.57047	8.4378	8.47971
Ccdc96	6.3361	6.19301	6.20615	6.34213	6.28207	6.11589	6.31745	5.73772	6.17787	6.3771	6.06516	6.18007
Ccdc97	10.3786	10.3299	10.4367	10.4844	10.4226	10.4235	10.1983	10.3284	10.0426	9.98403	9.81342	10.1607
Cchcr1	9.11031	9.30168	9.32815	9.33039	9.24245	9.3273	9.33121	9.1351	9.13542	9.00291	9.02064	8.89711
Ccl2	5.05844	5.05844	5.69851	5.80351	5.6937	5.85036	5.05844	5.05844	5.05844	5.4223	5.34289	5.84239
Ccl25	7.35374	7.28601	7.60199	7.58276	7.35858	7.50188	7.63745	7.74035	7.61436	7.54235	7.9696	7.91
Ccl27a	6.61503	6.62632	6.74721	6.53687	6.40479	6.50678	6.35891	6.54398	6.55193	6.80925	6.88686	6.95727
Ccl28	5.91862	6.04706	6.05865	5.7263	5.83342	6.18885	5.96236	6.11843	6.0018	6.09935	5.46007	5.61614
Ccl5	5.97614	5.87076	6.50989	6.19588	6.37119	6.16516	5.40487	5.77812	6.37074	6.33207	6.13664	6.52152
Ccl9	5.05844	5.05844	6.79575	6.80965	7.13789	7.24791	5.05844	5.05844	6.15082	6.15623	6.9208	6.86567
Ccm2	10.6817	10.7555	10.8027	10.8187	10.8147	10.7891	10.829	10.6841	10.7697	10.6754	10.516	10.7224
Ccna2	12.3943	12.3575	12.2923	12.3085	12.405	12.4095	12.2845	12.3342	12.4211	12.2476	12.2695	12.1848
Ccnb1	12.224	12.2226	12.1996	12.1488	12.044	12.0672	12.2437	12.2439	12.3392	12.3836	12.4893	12.4746
Ccnb1-ps	5.78843	5.63658	5.79556	5.6381	5.60969	5.85036	5.70274	5.8523	5.6822	5.78053	5.85417	5.76132
Ccnb2	10.7665	10.8297	10.8591	10.8224	10.6364	10.8304	10.7018	10.824	10.9719	11.0081	11.2046	11.1282
Ccnc	9.35335	9.1076	9.21095	8.89468	8.95696	9.14793	9.32251	9.28447	9.60176	9.82176	9.90242	9.84004
Ccnd1	12.4925	12.479	12.3821	12.4452	12.532	12.562	12.2847	12.3183	12.2081	12.1339	12.1521	12.1916
Ccnd2	13.5249	13.4949	13.4529	13.5238	13.7065	13.5787	13.4848	13.4371	13.4278	13.3299	13.1502	13.272
Ccnd3	12.7061	12.7086	12.6864	12.7139	12.7069	12.684	12.6262	12.6086	12.5811	12.4306	12.1513	12.339
Ccndbp1	9.31229	9.43684	9.25373	9.47036	9.28685	9.38108	9.51416	9.40578	9.64428	9.67506	9.84029	9.74816
Ccne1	10.6717	10.8132	10.7271	10.6849	10.5553	10.7409	10.7217	10.7368	10.5858	10.5952	10.8506	10.7782
Ccne2	9.8879	9.80427	9.57143	9.47221	9.6845	9.66061	9.70511	9.73899	10.0923	10.2859	10.4138	10.3195
Ccnf	10.8148	10.9245	10.929	11.0761	11.0361	11.0141	10.9102	10.8195	10.9139	10.9346	10.8104	10.7831
Ccng1	12.8951	12.7371	12.4274	12.36	12.7603	12.7292	12.3352	12.4845	12.3532	12.4745	12.8301	12.6302
Ccng2	7.14565	7.08171	7.16345	6.96586	7.17303	7.11023	7.45272	7.4517	7.55722	7.49907	7.61578	7.73958
Ccnh	9.60222	9.80602	9.72544	9.80876	9.48207	9.66727	9.81912	10.0027	10.0584	10.0881	10.3691	10.2919
Ccni	11.5702	11.4638	11.4739	11.4331	11.5903	11.5374	11.5155	11.611	11.5194	11.5874	11.4655	11.3162
Ccnj	8.18133	8.42313	8.30607	8.24697	8.51758	8.32872	8.30848	8.56177	8.46117	8.30704	8.49135	8.38625
Ccnjl	8.68231	8.56324	8.65799	8.97802	8.85273	8.77639	8.53384	8.32178	8.10094	8.23144	7.88321	8.03946
Ccnk	10.9423	10.9556	11.0707	11.0694	10.8651	10.8649	10.7527	10.7352	10.5839	10.5761	10.3548	10.6253
Ccnl1	9.33979	9.34334	9.42018	9.19337	9.05412	9.07944	9.2138	9.15912	9.2069	9.43808	9.50766	9.61884
Ccnl2	9.26389	9.30664	9.26161	9.12434	9.04964	9.15032	9.20673	9.22658	9.31626	9.39525	9.40329	9.48285
Ccno	5.91862	5.87076	5.8804	5.46969	5.60969	5.29994	5.70274	5.88668	5.31474	5.68539	5.46007	5.30909
Ccnt1	10.6484	10.5104	10.4367	10.4678	10.5856	10.3977	10.4372	10.3295	10.4553	10.4836	10.2814	10.3589
Ccnt2	9.74115	9.65674	9.66738	9.70876	9.63613	9.63702	9.47743	9.62139	9.48536	9.82006	9.64304	9.65905
Ccny	10.8154	10.6717	10.5683	10.6189	10.7522	10.6379	10.7815	10.8485	10.5819	10.5579	10.6539	10.5458
Ccnyl1	9.79458	9.68748	9.74241	9.83774	9.95802	9.9002	9.64365	9.71817	9.7003	9.5716	9.39215	9.63176
Ccp110	9.67336	9.71385	9.5903	9.56705	9.63762	9.48295	9.7463	9.53606	9.70761	9.54299	9.64069	9.32126
Ccpg1	8.68231	8.4773	8.70516	8.51292	8.71781	8.71952	8.81791	8.74172	8.53334	8.67644	8.31234	8.58277
Ccpg1os	5.75169	6.16562	6.14997	6.12569	6.07487	6.00832	5.74643	5.98139	6.30271	6.2098	5.94538	6.22962
Ccr10	6.44294	6.62632	6.60707	6.58446	6.07487	6.41746	6.5618	6.56052	6.32589	6.26054	6.90395	6.27676
Ccrl2	5.2915	5.05844	5.05844	5.05844	5.05844	5.05844	6.10564	5.8162	6.30271	6.2355	6.32319	6.27676
Ccs	8.34678	8.55906	8.66596	8.46882	8.48462	8.34979	8.62197	8.72245	8.47848	8.46915	8.84744	8.74176
Ccsap	8.32713	8.36679	8.65399	8.31101	8.53378	8.54484	8.57491	8.34305	8.2802	8.23661	8.02922	8.19865
Ccser2	10.7808	10.5877	10.7469	10.6889	10.9472	10.952	10.7267	10.6166	10.7853	10.8074	10.5426	10.7112
Cct2	13.4989	13.4807	13.3953	13.4274	13.354	13.3831	13.5267	13.6321	13.5369	13.5527	13.756	13.6572
Cct3	13.799	13.7998	13.8421	13.8356	13.8118	13.8747	13.9174	14.0286	14.0855	14.1874	14.4992	14.2778
Cct4	13.0184	12.9683	13.1285	13.1367	13.2476	13.2567	13.1652	13.3147	13.6682	13.7826	14.1646	13.9736
Cct5	13.6536	13.6994	13.6501	13.761	13.7872	13.7539	13.8943	14.0228	14.0732	14.2011	14.4341	14.2017
Cct6a	13.2595	13.3065	13.3086	13.3365	13.3885	13.4395	13.4552	13.5859	13.6547	13.8206	14.2025	14.0231
Cct6b	5.05844	5.50745	5.42999	5.7263	5.44941	5.05844	5.40487	5.30054	5.05844	5.4223	5.05844	5.4915
Cct7	14.311	14.359	14.4653	14.5365	14.465	14.5022	14.4646	14.5692	14.78	14.8183	14.9713	14.8321
Cct8	13.7419	13.7233	13.747	13.7297	13.6473	13.7376	13.7439	13.8489	13.8712	13.8943	14.1282	13.9723
Ccz1	10.4736	10.5579	10.6201	10.6633	10.5964	10.6681	10.7259	10.8404	10.89	10.8842	10.8063	10.699
Cd109	10.6794	10.4952	10.5871	10.7008	11.0828	11.018	10.628	10.5402	10.8386	10.7893	10.8229	10.8414
Cd151	11.7864	11.8191	11.7547	11.9066	11.9477	11.9051	11.9242	12.0705	12.0043	12.1202	12.4338	12.2457
Cd164	12.0646	11.9687	11.9885	11.871	11.922	12.0123	12.0523	12.1509	12.0709	12.166	12.1762	12.2049
Cd180	5.67111	5.05844	5.64353	5.29641	5.50944	5.05844	5.30369	5.30054	5.05844	5.31606	5.62462	5.30909
Cd1d1	5.75169	5.74071	5.99197	5.80351	5.60969	5.85036	5.99303	5.91954	5.8195	6.09935	5.98726	6.25348
Cd200r1	5.52305	5.42554	5.42999	5.05844	5.37799	5.05844	5.05844	5.40042	5.05844	5.68539	5.62462	5.05844
Cd247	5.05844	6.1083	5.05844	6.26123	5.05844	5.29994	5.70274	5.73772	6.25467	5.97316	5.80393	5.30909
Cd248	6.25815	6.47343	6.28468	6.36139	6.48441	6.71025	6.31745	6.45732	6.06449	6.35483	6.10161	6.18007
Cd274	6.55548	6.51367	6.12055	6.63013	6.77992	6.69581	8.43582	8.50265	8.79363	8.71007	8.89967	8.65725
Cd276	8.38907	8.12156	7.7698	7.94066	7.89249	7.76083	8.28157	8.36402	7.84892	7.8465	7.58593	7.69707
Cd2ap	11.1514	10.9173	10.9364	10.7968	10.9387	10.8865	11.1169	11.0616	10.9787	10.8777	10.8778	10.8759
Cd2bp2	10.1507	10.2015	10.3261	10.2264	10.1663	10.2244	10.1695	10.1618	10.1117	10.0377	10.1322	10.1746
Cd302	8.18571	8.33776	8.34148	8.16143	8.23351	8.32872	8.45997	8.46827	8.60203	8.72111	8.93474	9.22214
Cd320	9.15968	9.45706	9.51984	9.62475	9.62716	9.72435	9.49107	9.60053	9.6632	9.86531	10.2339	10.0957
Cd37	5.46124	5.63658	5.05844	5.3946	5.28462	5.6466	5.30369	5.05844	5.62858	5.31606	5.85417	5.30909
Cd38	5.91862	6.29534	6.05865	6.0757	6.35398	6.31991	5.82586	6.0927	6.25467	6.1834	6.32319	6.15428
Cd3eap	8.8938	9.11328	8.85197	9.12434	9.06525	9.16691	9.15864	9.0808	8.98681	8.95082	9.07051	9.05379
Cd44	12.8094	12.6577	12.8877	12.9039	13.1147	13.0935	12.8942	12.8691	13.2493	13.2166	13.1288	13.0351
Cd46	5.62626	5.90932	5.74887	5.68385	5.65326	5.6466	5.96236	5.88668	6.0942	5.93837	5.98726	5.94911
Cd47	9.31229	9.17977	9.46407	9.37066	9.36636	9.46582	9.67812	9.63513	9.99864	9.9471	10.2904	10.3555
Cd59a	7.67337	7.72914	7.42028	7.49538	7.51465	7.72857	7.84413	7.92854	7.74393	7.83279	8.15475	8.16823
Cd63	13.891	14.0505	14.0345	14.1576	13.8824	13.9861	14.2289	14.3397	14.35	14.4583	14.6886	14.6644
Cd68	6.05547	5.87076	5.91939	6.0496	6.33647	6.11589	5.82586	5.98139	6.0942	6.39891	5.90115	6.20517
Cd72	5.82326	5.57622	6.09014	6.70245	6.00214	6.06377	5.96236	6.28101	6.12295	6.2098	6.66043	6.27676
Cd74	5.05844	5.05844	5.58246	5.80351	5.76728	5.81435	5.74643	5.40042	6.43458	5.93837	6.40483	6.70618
Cd79a	5.2915	5.63658	5.42999	5.68385	5.44941	5.81435	5.30369	5.4768	5.31474	5.31606	5.05844	5.30909
Cd81	12.1958	12.2813	12.119	12.2255	12.1397	12.246	11.9697	11.9498	11.7997	11.7798	11.8381	11.85
Cd82	8.86157	8.57569	8.97551	9.03434	8.96651	9.06938	8.76094	8.64609	9.0342	8.77506	9.09481	8.91842
Cd9	9.5777	9.78663	10.2609	10.1534	10.1041	10.2039	9.59938	9.61273	10.3636	10.5363	10.9648	10.9955
Cd99l2	9.06861	9.04057	9.12137	9.24196	9.07631	9.00223	9.17323	9.27572	9.07159	9.3273	9.39773	9.37497
Cda	5.85645	5.90932	5.95651	5.90522	5.8939	5.47576	5.8624	5.91954	5.73133	5.86371	5.62462	5.87968
Cdadc1	8.34678	8.44142	8.44267	8.51654	8.311	8.47001	8.45197	8.64267	8.70839	8.59871	8.87178	8.7211
Cdan1	10.1092	10.0383	10.0786	9.94949	10.0559	9.84394	9.90599	9.99876	9.96855	9.76274	9.79663	9.7932
Cdc123	11.1099	11.1123	11.2153	11.1227	11.112	11.1027	11.2915	11.3502	11.4395	11.4785	11.7324	11.6436
Cdc14a	8.7544	8.70593	8.75081	8.79139	8.92306	8.76707	8.86071	8.83134	8.8277	8.72111	8.6828	8.88169
Cdc14b	8.17252	8.26246	7.97233	7.94609	8.18488	8.09864	8.00197	7.88237	8.21951	7.989	7.79971	8.00533
Cdc16	10.7621	10.8063	10.8771	10.9578	10.8765	10.8327	10.869	11.025	11.2268	11.2406	11.4669	11.2256
Cdc20	11.569	11.8099	11.9818	11.926	11.6409	11.8199	11.7147	11.738	11.826	11.7386	11.7488	11.7327
Cdc23	10.3861	10.3872	10.3423	10.3888	10.3179	10.4047	10.3308	10.367	10.313	10.3067	10.3663	10.2495
Cdc25a	11.6643	11.5813	11.4784	11.5761	11.5964	11.479	11.4808	11.4325	11.2582	11.2014	10.9287	11.016
Cdc25b	10.9301	10.6504	10.8241	10.779	10.716	10.8452	10.6748	10.6524	10.6123	10.4663	10.3916	10.5043
Cdc25c	9.05681	9.03758	9.15844	9.13373	9.11326	9.16927	9.18529	9.22885	9.47469	9.33209	9.1913	9.16988
Cdc26	9.65317	9.78841	9.86109	9.92269	9.912	9.82766	9.92763	10.0277	10.1802	10.345	10.5477	10.6733
Cdc27	11.6502	11.6201	11.6499	11.4917	11.6527	11.7361	11.6947	11.6764	11.7661	11.7277	11.734	11.5785
Cdc34	11.7939	11.9303	11.9566	11.955	11.86	11.9482	11.9148	11.9235	12.0249	12.1315	12.4586	12.4121
Cdc37	12.7136	12.8371	12.787	12.8194	12.6797	12.7435	12.7804	12.771	12.6702	12.7257	12.8564	12.7705
Cdc37l1	9.96297	9.98982	9.95949	9.91319	9.8984	9.91847	10.0784	10.0432	10.0754	10.2547	10.379	10.4143
Cdc40	10.5469	10.5007	10.5079	10.4053	10.4843	10.4195	10.6067	10.5762	10.5588	10.5144	10.6493	10.4605
Cdc42	12.5498	12.6392	12.5773	12.5716	12.6049	12.6677	12.6939	12.7392	12.6483	12.6926	12.8299	12.7628
Cdc42bpa	10.5794	10.4343	10.357	10.3248	10.601	10.5433	10.2891	10.1197	9.93004	10.0363	9.65241	10.0289
Cdc42bpb	12.8257	12.69	12.6057	12.6553	12.6774	12.5404	12.4792	12.3384	12.0584	12.0842	11.6876	12.0865
Cdc42bpg	10.2501	10.1827	10.1065	9.981	9.97814	9.88598	9.74467	9.65719	9.46825	9.3511	9.12208	9.56598
Cdc42ep1	9.56778	9.52888	9.42486	9.3587	9.64357	9.72595	8.81481	8.76073	8.06678	8.02545	8.30036	8.47146
Cdc42ep2	5.78843	5.87076	5.91939	6.10104	5.94986	6.09022	5.82586	5.8162	5.9686	5.90196	5.80393	5.91518
Cdc42ep3	7.80597	7.92611	7.70827	7.71696	7.89249	7.64791	7.97968	8.1389	7.82855	7.99514	8.12099	7.86614
Cdc42ep4	9.56112	9.47701	9.58404	9.60634	9.60448	9.33151	9.92189	9.94188	9.90166	9.88823	9.56583	9.70692
Cdc42se1	11.1646	11.2834	11.1853	11.2226	11.0724	11.1664	11.3009	11.2902	11.1992	11.1583	11.3184	11.2775
Cdc42se2	10.9442	10.887	10.8949	10.8917	11.0969	10.979	10.9374	11.0112	11.1986	11.2105	11.3453	11.1918
Cdc45	10.2919	10.288	10.3813	10.2513	10.2318	10.2267	10.4036	10.3985	10.5002	10.4576	10.4953	10.5023
Cdc5l	10.9783	11.0233	10.9703	10.9531	11.0243	11.0335	11.0703	11.0937	11.06	11.063	11.0415	10.9058
Cdc6	10.5753	10.7428	10.8072	10.891	10.7004	10.7737	10.7894	10.632	10.6316	10.5176	10.4055	10.5271
Cdc7	8.5735	8.58804	8.56725	8.52732	8.51105	8.61592	8.59319	8.56177	8.68253	8.92881	8.99134	8.844
Cdc73	10.7614	10.5958	10.5448	10.5232	10.5987	10.7042	10.7226	10.5466	10.9068	10.682	10.6493	10.6225
Cdca2	9.91553	9.91228	9.9611	9.89125	10.0255	9.87738	9.90017	9.82691	9.69296	9.57565	9.64069	9.52896
Cdca3	11.2909	11.3852	11.5308	11.3751	11.2828	11.4007	11.3815	11.4002	11.4827	11.4661	11.6396	11.5747
Cdca4	10.4648	10.5877	10.3716	10.4169	10.476	10.4756	10.3839	10.3854	10.3944	10.4964	10.5787	10.5162
Cdca5	9.38574	9.62533	9.62122	9.60465	9.55802	9.61993	9.68152	9.62999	9.67256	9.71957	9.96949	9.77002
Cdca7	10.415	10.3116	10.3423	10.3042	10.4183	10.3987	10.2924	10.4284	10.1802	10.1718	10.2245	10.3622
Cdca7l	11.1104	11.1271	11.1652	11.1518	11.1671	11.1711	11.1424	11.1005	11.0269	11.0674	10.8445	10.7757
Cdca8	10.7075	10.7086	10.7186	10.7335	10.6312	10.6871	10.6705	10.5438	10.48	10.4277	10.3832	10.4922
Cdh1	5.9479	6.3428	5.74887	6.02268	5.83342	5.53977	5.96236	6.14345	6.12295	5.73475	5.69046	5.80306
Cdh10	6.3361	6.38817	6.12055	6.14968	5.92239	6.31991	6.05118	6.49281	6.22975	6.55904	5.90115	6.12775
Cdh11	5.38768	5.50745	5.05844	5.3946	5.50944	5.6466	5.30369	5.05844	5.42043	5.6315	5.05844	5.55788
Cdh13	6.82669	6.8383	6.60707	6.3803	6.45326	6.16516	6.37903	6.65503	6.34856	6.0695	6.06516	5.98165
Cdh15	5.46124	5.05844	5.05844	5.05844	5.28462	5.05844	5.40487	5.05844	5.56905	5.50349	5.34289	5.4915
Cdh17	5.05844	5.57622	5.42999	5.05844	5.28462	5.29994	5.40487	5.77812	5.50121	5.31606	5.46007	5.30909
Cdh19	10.7022	10.4833	10.2158	10.1875	10.1434	10.2612	10.7487	10.7336	10.8494	10.914	11.061	10.8821
Cdh2	11.7108	11.569	11.4321	11.4641	11.629	11.5223	11.3439	11.27	11.0686	11.0163	10.9544	11.0953
Cdh24	6.54009	6.3428	6.33379	6.3025	6.09781	6.31991	6.20561	6.2594	6.17787	6.12823	6.26489	6.27676
Cdh6	5.88818	5.98111	5.83924	5.7263	5.76728	5.85036	6.02261	6.03886	6.25467	5.97316	5.98726	6.25348
Cdh9	5.05844	5.50745	5.05844	5.05844	5.37799	5.05844	5.40487	5.54096	5.50121	5.05844	5.54955	5.61614
Cdhr2	6.50865	6.3428	6.20615	6.43506	6.16333	6.18885	6.29607	6.51013	5.73133	6.1834	5.80393	5.61614
Cdhr4	7.47625	7.72156	8.08465	7.69765	7.58639	7.58413	7.63023	7.63212	7.61436	7.6409	7.43718	7.3827
Cdip1	10.3899	10.3324	10.4263	10.339	10.1444	10.2199	10.3724	10.2425	10.124	10.1544	10.0932	10.081
Cdipt	11.0677	11.163	11.0595	11.0675	11.1327	11.115	11.0992	11.1491	11.0392	10.9322	10.8698	10.9103
Cdk1	11.7963	12.0366	12.037	11.804	11.6312	11.8513	11.8623	11.9491	12.0684	12.125	12.4719	12.5635
Cdk10	8.67922	8.62044	9.0503	8.88914	8.87824	8.75454	8.79287	8.73212	9.00179	9.06474	9.17837	9.02884
Cdk11b	10.4423	10.4138	10.4676	10.5436	10.4243	10.4756	10.4442	10.3629	10.2974	10.0824	10.0425	10.005
Cdk12	10.0804	9.9571	9.94165	9.88154	9.99798	9.85857	9.85119	9.611	9.53963	9.44694	9.19451	9.62992
Cdk13	10.247	10.0293	10.1453	10.3031	10.4776	10.2221	10.1623	9.9787	10.0641	9.95797	9.73626	9.99509
Cdk14	8.15921	8.20993	7.88518	8.0096	8.08227	8.1717	7.76777	7.70076	7.75119	7.64879	7.70161	7.62314
Cdk15	9.78605	9.80602	9.81015	9.89677	9.84397	9.7355	9.8421	9.89128	9.72392	9.8098	9.78816	9.7104
Cdk16	11.2884	11.3065	11.2838	11.3587	11.3529	11.4067	11.3466	11.276	11.1364	11.0208	10.7616	10.8913
Cdk17	10.4378	10.1975	10.1775	10.201	10.1755	10.182	10.3818	10.3221	10.1723	10.1353	9.85658	9.9575
Cdk18	8.42276	8.40925	8.40019	8.30263	8.60905	8.55211	8.43988	8.1963	7.98978	8.01341	7.75599	8.116
Cdk19	9.74702	9.74888	9.60688	9.66413	9.61813	9.66561	9.73979	9.80124	9.72932	9.67694	9.37809	9.60206
Cdk2	12.5582	12.5472	12.6515	12.612	12.4387	12.4424	12.7104	12.7097	12.7953	12.7741	12.7158	12.688
Cdk20	7.8117	7.91954	8.06655	8.14274	8.05539	8.15259	8.04549	8.06368	7.959	7.93886	8.18118	7.99376
Cdk2ap1	12.7445	12.9784	12.9191	12.9371	12.8327	12.8739	12.8361	12.9056	12.7343	12.836	12.8584	12.8162
Cdk2ap2	8.59003	8.52521	8.54579	8.49104	8.43715	8.30733	8.64317	8.1963	8.45681	8.36474	8.61218	8.47146
Cdk4	12.8479	12.9502	12.9659	12.9557	12.8129	12.9412	12.9308	12.9516	13.0533	13.1632	13.4176	13.3008
Cdk5	9.11031	9.44811	9.22177	9.52666	9.11754	9.37294	9.28046	9.45699	9.30424	9.21246	9.4524	9.54466
Cdk5r1	6.19536	6.36573	5.74887	6.10104	6.09781	6.16516	6.1816	6.36309	6.22975	6.03859	5.98726	6.10042
Cdk5r2	6.55548	6.89666	6.74721	6.93153	6.8491	7.0244	6.52761	6.5929	6.41372	6.61359	6.26489	6.69056
Cdk5rap1	8.03333	8.17195	8.37114	8.24259	8.18075	8.4623	8.42359	8.15347	8.49559	8.71744	8.78897	8.92143
Cdk5rap2	11.576	11.2759	11.3175	11.334	11.5195	11.3699	11.3272	11.111	10.9772	10.9924	10.6759	11.0321
Cdk5rap3	9.45561	9.43231	9.61509	9.65927	9.59684	9.54765	9.39896	9.43555	9.51066	9.51589	9.34956	9.3029
Cdk6	8.95871	8.84248	8.59258	8.74911	9.39309	9.11165	8.98742	8.88714	8.93468	8.72477	8.82267	8.90628
Cdk7	9.66097	9.81474	9.84547	9.76265	9.57834	9.81721	9.91034	10.012	9.94248	10.3391	10.6352	10.6581
Cdk8	10.3842	10.4646	10.3728	10.3621	10.5097	10.3805	10.2746	10.2222	10.0979	10.2009	10.0619	10.1922
Cdk9	11.0642	11.1725	11.188	11.227	11.0833	11.0848	10.9614	11.0112	11.1492	11.0915	11.0424	11.0732
Cdkal1	7.46891	7.50801	7.37073	7.59679	7.55425	7.49414	7.60836	7.8587	7.67687	7.64879	7.89129	7.63825
Cdkl1	5.2915	5.31837	5.32153	5.46969	5.6937	5.39957	5.30369	5.64805	5.56905	5.50349	5.05844	5.30909
Cdkl2	7.51235	7.42548	7.17521	7.24821	7.3358	7.61994	7.65177	7.34282	7.57379	7.43605	7.44837	7.65319
Cdkl3	8.17693	7.9063	7.99808	7.90766	8.01874	7.84132	8.09806	8.10929	7.88221	8.16246	8.1614	8.23822
Cdkl4	5.2915	5.05844	5.05844	5.3946	5.44941	5.39957	5.40487	5.30054	5.05844	5.31606	5.62462	5.61614
Cdkl5	7.74127	7.71394	7.38079	7.48784	7.78689	7.47068	7.73466	7.62506	7.70708	7.6007	7.33204	7.64574
Cdkn1a	12.2007	12.1767	11.8031	11.8161	11.9375	11.9062	11.5098	11.5918	11.077	10.9817	10.9469	11.1269
Cdkn1b	10.2778	10.2486	10.489	10.4111	10.455	10.5755	10.5268	10.5798	10.9343	11.1697	11.236	11.1066
Cdkn1c	5.2915	5.05844	5.42999	5.46969	5.6937	5.39957	5.48222	5.30054	5.05844	5.73475	5.34289	5.41247
Cdkn2aip	8.39663	8.54224	8.46115	8.53803	8.42329	8.65017	8.47584	8.42111	8.47848	8.5786	8.70558	8.55964
Cdkn2aipnl	11.3441	11.3551	11.4379	11.5859	11.6282	11.5388	11.5517	11.5732	11.8587	11.9708	12.1179	12.0169
Cdkn2c	10.6562	10.6465	10.7506	10.7086	10.7699	10.6813	10.8359	10.7907	10.8444	10.8613	10.7354	10.8759
Cdkn2d	9.83788	9.85929	9.84023	9.88848	9.82187	9.90303	9.93049	9.94464	10.0441	10.1257	10.4356	10.2838
Cdkn3	8.31919	8.42772	8.38574	8.5309	8.41631	8.47001	8.39463	8.71597	9.0342	9.02085	9.23566	9.19749
Cdnf	5.75169	5.63658	5.99197	5.7263	5.83342	5.77636	5.82586	5.8523	5.56905	5.57167	5.80393	5.66863
Cdon	10.2584	10.0353	9.97711	9.74134	9.91937	9.86584	9.92906	9.8164	9.30183	9.55737	9.21997	9.44778
Cdpf1	8.41534	8.4046	8.47939	8.54158	8.18488	8.35813	8.43988	8.70292	8.91581	9.00592	9.09481	9.19001
Cdr2	9.09885	9.11611	9.14429	9.15466	9.08946	9.17162	9.11645	9.06817	9.18609	9.01191	9.08445	9.16988
Cdr2l	11.0393	10.9461	10.7991	10.9033	11.0254	10.895	10.6824	10.5921	10.4991	10.3438	10.0425	10.36
Cdrt4	5.62626	5.83006	5.79556	5.7263	5.86428	5.85036	5.96236	5.30054	5.6822	5.4223	6.06516	5.98165
Cds2	11.1369	11.1354	11.0489	11.1025	11.1865	11.0891	11.1362	11.1286	11.0078	11.0178	10.8956	10.9797
Cdsn	5.88818	5.69093	5.42999	5.6381	5.50944	5.6466	5.60425	5.88668	5.50121	5.31606	5.05844	5.76132
Cdt1	11.594	11.5844	11.824	11.6781	11.6293	11.6701	11.4607	11.3957	11.4395	11.3246	11.1059	11.408
Cdv3	13.1202	12.9716	12.9569	13.1003	13.1842	13.0922	13.0901	13.0791	13.0014	12.9854	12.7296	12.7977
Cdv3-ps	5.9479	6.07822	6.14997	6.10104	5.76728	5.81435	5.8624	5.88668	5.89773	5.78053	5.85417	5.87968
Cdyl	8.82022	8.74682	8.75828	8.69284	8.50777	8.60198	8.7577	8.70292	8.68253	8.76798	8.45408	8.53217
Cdyl2	6.23767	6.07822	6.09014	6.14968	6.02708	6.25657	6.41815	6.14345	6.17787	5.93837	6.17037	6.15428
Ceacam1	6.49259	6.31935	5.95651	6.0496	6.12018	6.16516	6.43718	6.34318	5.93397	5.97316	5.80393	6.07223
Cebpb	8.12308	8.29307	8.36132	8.31933	8.28051	8.21378	8.13873	8.21954	8.43479	7.99514	8.1614	8.42523
Cebpd	6.68535	6.64406	6.94481	6.98824	7.3358	6.9792	6.57851	6.43913	6.53322	6.73163	6.88686	7.32707
Cebpg	9.52053	9.32388	9.51326	9.54612	9.7299	9.66061	9.49494	9.60751	9.71125	9.71041	9.81342	9.68937
Cebpz	10.8028	10.8141	10.7375	10.7827	10.8491	10.7025	10.7283	10.7706	10.8469	10.777	10.7809	10.7412
Cebpzos	8.94083	8.9951	9.05938	9.09094	8.99476	9.16691	9.17807	9.34222	9.44437	9.47967	10.1103	10.1063
Cecr6	5.38768	5.05844	5.05844	5.3946	5.05844	5.53977	5.40487	5.40042	5.05844	5.4223	5.34289	5.41247
Cela1	8.19008	8.2573	8.46573	8.35619	8.12163	8.43893	8.01845	8.23331	8.49984	8.68774	8.92314	9.22702
Celf1	11.9383	11.7897	11.8271	11.8345	11.8462	11.8561	11.9159	11.8544	11.7774	11.752	11.5549	11.7331
Celf2	12.0543	11.9363	11.8512	11.6753	11.8946	11.9282	11.837	11.6953	11.6694	11.6073	11.4669	11.5969
Celf3	5.46124	5.50745	5.42999	5.29641	5.44941	5.39957	5.70274	5.05844	5.56905	5.4223	5.54955	5.05844
Celf5	5.05844	5.63658	5.51288	5.68385	5.65326	5.59597	5.05844	5.05844	5.05844	5.4223	5.34289	5.30909
Celsr1	5.67111	5.63658	5.69851	5.3946	5.05844	5.59597	5.48222	5.64805	5.31474	5.73475	5.62462	5.41247
Celsr2	9.91162	9.83719	9.28757	9.3587	9.24832	9.16691	9.54624	9.16625	8.63709	8.55408	8.30636	8.55185
Celsr3	5.91862	5.90932	5.79556	5.93625	6.07487	5.47576	5.60425	5.77812	5.77688	5.86371	6.06516	5.84239
Cemip	5.71273	5.05844	5.64353	5.6381	5.76728	5.39957	5.40487	5.4768	5.05844	5.31606	5.05844	5.05844
Cenpa	10.8383	10.9358	10.9941	10.9611	10.9339	10.9581	10.9565	11.023	11.2413	11.414	11.7428	11.8314
Cenpb	12.7526	12.873	12.8662	12.9417	12.8741	12.856	12.8337	12.8183	12.7093	12.7122	12.6201	12.6242
Cenpc1	8.97386	8.9951	8.8796	8.95697	8.85273	8.85179	8.78971	9.04256	9.20173	9.10172	9.15876	8.9601
Cenpe	11.3973	11.1016	11.1575	11.2166	11.3816	11.2285	11.268	11	10.9847	11.0059	10.6528	11.0019
Cenpf	11.3069	10.9705	10.9615	10.9525	11.1173	10.9424	11.1181	10.8558	10.7688	10.7487	10.4138	10.7438
Cenph	9.35527	9.7213	9.61099	9.6898	9.30949	9.38108	9.55925	9.36303	9.57003	9.72685	9.76892	9.493
Cenpi	8.82858	8.82525	8.52838	8.6768	8.81622	8.80096	8.93121	8.86391	9.16231	9.23566	9.55838	9.33714
Cenpj	8.54325	8.538	8.44267	8.5627	8.45769	8.55211	8.90809	8.77638	8.8277	8.5907	8.55808	8.62792
Cenpk	8.58014	8.50798	8.4703	8.30263	8.36645	8.60897	8.75121	8.7062	8.73737	9.12953	9.3116	9.25116
Cenpl	8.53302	8.42313	8.63787	8.51292	8.60905	8.44677	8.60405	8.64609	8.72295	8.90323	8.8798	8.98338
Cenpm	8.89114	9.07593	8.82379	9.12198	8.83459	9.02843	8.97635	9.16625	9.07442	9.00592	9.14885	9.18501
Cenpn	9.06626	9.23292	9.32815	9.22887	9.18033	9.04393	9.00386	9.22203	9.16498	9.18358	9.25425	9.05654
Cenpo	9.0473	9.0613	9.11267	9.27205	8.86299	9.03103	8.90518	9.00327	9.00477	8.92246	8.95386	9.12614
Cenpp	7.10749	7.2541	7.43959	7.31875	7.25694	7.22911	7.69384	7.4517	7.57379	7.71791	7.87508	7.89137
Cenpq	9.21167	9.21718	9.18355	9.25278	8.94253	9.33151	9.26238	9.50832	9.5478	9.68445	10.021	10.0387
Cenps	8.87509	9.02557	8.88302	8.93561	8.82937	8.96472	9.08334	9.11559	8.98982	9.12677	9.51538	9.30521
Cenpt	8.49135	8.45048	8.39539	8.43863	8.26112	8.22753	8.20242	8.37231	8.3897	8.16789	8.0864	8.20865
Cenpu	8.41906	8.26246	8.4703	8.49471	8.28051	8.37466	8.23555	8.36817	8.64477	8.8739	8.65497	8.60552
Cenpv	7.80597	7.94564	7.70827	7.58979	7.70203	7.77352	7.89876	7.7207	7.97755	7.79791	8.28828	8.24794
Cenpw	9.45561	9.54366	9.53508	9.28475	9.492	9.46582	9.49107	9.63342	9.9096	9.99161	10.1288	10.3918
Cenpx	8.66058	9.08464	9.05636	8.95697	8.75414	8.96472	8.89051	8.94085	9.12998	9.28839	9.48161	9.52303
Cep104	9.91684	9.71758	9.82261	9.74899	9.95085	9.67557	9.81603	9.77667	9.62704	9.70488	9.49209	9.52303
Cep112	6.37294	6.43165	6.4685	6.39887	6.61462	5.94891	6.37903	6.49281	6.30271	6.2098	6.55145	6.18007
Cep120	9.3359	9.21718	9.23517	8.97016	9.32623	9.24042	9.24407	9.20828	9.0107	9.12953	8.84744	8.88788
Cep126	6.44294	6.31935	6.62554	6.34213	6.16333	6.31991	6.57851	6.2147	6.41372	6.66565	6.2344	6.53961
Cep128	9.36868	9.36729	9.34802	9.38449	9.42452	9.29964	9.41132	9.36921	9.28481	9.18092	8.75881	8.95716
Cep131	9.65629	9.66256	9.65548	9.73519	9.71446	9.70016	9.57763	9.30828	9.22742	9.20202	8.8798	9.1648
Cep135	9.52567	9.33607	9.4754	9.51414	9.36636	9.28886	9.44174	9.53422	9.67256	9.61546	9.64069	9.64456
Cep152	8.98885	8.90943	8.73953	8.9112	8.7093	8.71306	8.81791	8.75758	8.75519	8.6146	8.44868	8.395
Cep162	9.27614	8.95449	9.38935	9.30568	9.68738	9.50732	9.02549	9.00061	9.2069	9.31283	9.10851	9.34164
Cep164	10.4531	10.4723	10.3034	10.3631	10.2591	10.1855	10.2633	10.2187	9.95173	9.95797	9.52816	9.7932
Cep170	10.7306	10.3778	10.446	10.3083	10.5306	10.5622	10.4352	10.3494	10.3356	10.2087	9.98253	10.2779
Cep170b	11.6021	11.5048	11.2838	11.3089	11.513	11.3332	11.362	11.2145	10.9076	10.8777	10.6006	10.938
Cep19	8.5534	8.538	8.5587	8.31517	8.70645	8.53753	8.40297	8.41309	8.61772	8.69148	8.41025	8.67885
Cep192	10.4603	10.2512	10.1885	10.2043	10.3095	10.0795	10.3211	10.0813	9.99267	10.0508	9.62174	9.84163
Cep250	11.2372	10.9814	10.9815	11.0669	11.1495	10.9286	10.948	10.6758	10.3531	10.463	10.0282	10.3765
Cep290	9.1967	8.79368	8.93001	8.70237	8.95696	8.92341	9.01471	9.06308	8.8411	9.09327	8.82683	8.77221
Cep295	9.98549	9.90902	9.82615	9.77169	9.97461	9.90726	10.0043	9.91117	9.88886	9.933	9.74066	9.66983
Cep295nl	5.78843	5.90932	5.64353	5.68385	5.6937	5.85036	5.82586	5.8523	5.31474	5.57167	5.80393	5.84239
Cep350	10.0235	9.76698	9.75175	9.63635	9.92059	9.78232	9.85119	9.64025	9.7185	9.6694	9.42259	9.47057
Cep41	7.77694	7.94564	7.70827	7.91875	7.69031	7.7861	7.81915	7.70076	7.95276	7.74754	7.9388	8.3049
Cep44	8.19877	8.20993	8.16051	8.14743	8.23351	7.87695	8.22616	8.05333	8.60203	8.7357	8.84334	8.89096
Cep55	9.83925	9.74706	9.83321	9.82766	9.76304	9.95707	9.92045	9.90126	10.1172	10.0479	10.1766	10.1181
Cep57	9.7746	9.99444	9.88506	9.90363	9.8388	9.93514	9.87366	9.90693	10.1185	10.365	10.8073	10.7138
Cep57l1	7.96331	7.8658	7.93278	7.92426	7.80326	7.9002	7.7937	7.96772	8.13976	7.98283	8.21991	8.08915
Cep63	8.97637	8.98893	9.13574	9.13607	9.11326	9.05417	9.13397	9.10326	9.07159	8.88701	8.94624	8.58658
Cep68	9.8143	9.88271	9.85764	9.92269	9.83621	9.8217	9.77523	9.81187	9.77698	9.74311	9.84846	9.74986
Cep70	8.59986	8.38109	8.46115	8.47626	8.51758	8.39911	8.41538	8.60455	8.65999	8.74654	8.96897	8.79215
Cep72	7.47625	7.42548	7.41052	7.50288	7.09257	7.24791	7.35877	7.29845	7.50624	7.29007	7.33204	7.25907
Cep76	9.53758	9.19056	9.08331	8.93561	9.13878	9.15982	9.24176	9.29534	9.17293	9.30798	9.29673	9.12352
Cep78	8.79482	8.77225	8.72817	8.82084	8.98775	8.78565	8.78971	8.68975	8.90947	8.92881	8.67358	8.63899
Cep83	9.34755	9.11894	9.22714	9.25708	9.27923	9.13834	9.39896	9.24912	9.15698	9.37218	9.25117	9.26309
Cep85	8.93052	8.95449	8.92007	8.90846	8.82937	8.84295	8.73486	8.86391	8.67506	8.46477	8.6828	8.50012
Cep85l	7.32946	7.3871	7.2874	7.22997	7.19877	7.21961	7.44445	7.31637	7.38868	7.10232	7.29505	7.34587
Cep89	9.5941	9.60131	9.71592	9.82622	9.84912	9.74025	9.77683	9.82541	9.94865	9.79602	9.97696	9.76668
Cep95	8.04305	8.06337	8.2592	7.93522	8.0867	7.81091	8.01298	8.07394	7.72194	7.92603	7.95429	8.02818
Cep97	8.40414	8.42313	8.32641	8.31933	8.31477	8.28998	8.40712	8.1389	8.29987	8.32169	8.30036	8.35965
Cept1	8.91751	8.91921	8.82023	8.83245	9.02474	8.92899	8.97357	9.10821	9.10247	9.26352	9.47634	9.29363
Cer1	5.97614	5.74071	5.79556	6.21816	5.86428	5.39957	5.93046	5.4768	5.89773	5.82336	5.62462	5.80306
Cercam	5.85645	5.90932	5.83924	6.26123	5.80115	6.31991	5.8972	6.03886	5.6822	5.78053	5.90115	6.15428
Cerk	11.1133	11.0166	10.8556	10.9571	10.9698	10.8879	10.7902	10.6923	10.5548	10.4543	10.323	10.3633
Cerkl	6.10455	6.3428	6.2592	6.28208	5.97642	6.11589	6.13167	6.4018	6.03372	6.09935	6.52834	6.42632
Cers1	8.41534	8.61241	8.51076	8.43098	8.44059	8.32872	8.33051	8.47983	8.00191	7.86008	8.04374	7.89761
Cers2	12.3136	12.1995	12.2547	12.2895	12.1819	12.1922	12.3118	12.3525	12.3348	12.3542	12.3718	12.2236
Cers3	5.62626	5.57622	5.42999	5.3946	5.50944	5.47576	5.78732	5.4768	5.62858	5.68539	5.54955	5.55788
Cers4	10.0015	10.1052	9.97393	10.0704	9.98751	10.0645	10.0016	10.0393	9.92221	10.0638	10.0724	9.95457
Cers5	10.765	10.778	10.5996	10.6164	10.6131	10.7211	10.7193	10.6148	10.5937	10.6373	10.7883	10.6813
Cers6	9.59246	9.44361	9.4272	9.53554	9.48207	9.39321	9.54997	9.58821	9.53347	9.39296	9.27868	9.3144
Cetn2	9.5171	9.66062	9.65349	9.54084	9.51488	9.45622	9.88107	9.97331	9.93004	10.0022	10.3634	10.4397
Cetn3	10.0126	10.2108	10.3236	10.2503	9.88467	10.282	10.3024	10.4995	10.6507	10.8563	11.0539	11.1571
Cfap100	6.12811	6.1083	5.83924	5.87287	5.97642	6.14086	6.05118	5.5973	5.6822	5.73475	6.06516	5.84239
Cfap126	6.02985	6.19301	6.23304	5.96609	6.0513	6.27813	5.93046	6.23731	6.0018	6.15623	6.32319	6.0431
Cfap20	9.84062	9.94284	10.0933	9.99393	9.67583	9.92683	9.77045	9.97331	10.2925	10.228	10.2385	10.2254
Cfap36	9.71591	9.65674	9.73112	9.78663	9.89591	9.86873	9.93192	10.1499	10.1697	10.2785	10.6222	10.568
Cfap43	8.18133	8.20993	8.12017	8.20259	8.06889	7.77982	8.07202	8.06882	7.89531	7.88684	7.56565	7.71849
Cfap46	5.2915	5.31837	5.42999	5.83903	5.6937	5.85036	5.40487	5.30054	5.42043	5.31606	5.7497	5.41247
Cfap52	5.38768	5.05844	5.74887	5.46969	5.65326	5.29994	5.05844	5.40042	5.05844	5.05844	5.54955	5.05844
Cfap54	11.0967	10.8687	10.4367	10.5188	10.6184	10.5702	10.8548	10.6858	10.3601	10.3054	10.0777	10.062
Cfap57	5.46124	5.63658	5.42999	5.58818	5.60969	5.29994	5.05844	5.54096	5.05844	5.05844	5.34289	5.41247
Cfap69	5.2915	5.69093	5.51288	5.05844	5.8939	5.73606	5.78732	5.5973	5.9686	5.57167	5.54955	5.61614
Cfap70	6.05547	5.78687	6.23304	6.32251	6.02708	6.39866	6.15697	5.8162	5.9686	5.4223	5.94538	6.0431
Cfap74	7.64782	7.79557	7.83588	7.52514	7.67253	7.59857	7.78726	7.62506	7.82855	8.04333	7.53466	7.72555
Cfap77	5.57734	5.31837	5.42999	5.7263	5.44941	5.47576	5.40487	5.54096	5.56905	5.50349	5.34289	5.41247
Cfap97	9.27411	8.95449	9.04421	9.07395	9.15971	9.13834	9.12399	9.00857	9.17557	9.05607	9.1422	8.74176
Cfb	5.85645	6.31935	6.2592	6.0496	5.76728	5.73606	6.31745	6.45732	6.41372	6.52115	6.35112	6.53961
Cfdp1	10.5503	10.7984	10.8779	10.7534	10.4516	10.7017	10.8305	10.8247	10.8278	10.9626	11.2212	11.1609
Cfl1	14.5739	14.65	14.6283	14.5051	14.3962	14.548	14.5258	14.5066	14.3562	14.2989	14.2673	14.337
Cfl2	10.8601	10.7574	10.8923	10.8631	10.704	10.8215	10.941	10.9719	11.1465	11.1139	11.2759	11.2128
Cflar	10.7336	10.5785	10.5373	10.586	10.7181	10.5649	10.8367	10.8202	10.9296	10.9012	10.7978	11.0012
Cfp	6.05547	5.98111	5.64353	6.0757	5.94986	5.81435	6.07883	6.01062	6.0942	5.90196	6.06516	5.91518
Cftr	6.23767	6.45275	6.50989	6.68834	6.74378	6.75253	6.45588	6.28101	6.39245	6.79412	6.66043	6.91884
Cggbp1	11.6009	11.5742	11.5497	11.3878	11.6014	11.6349	11.6871	11.6236	11.804	11.8419	11.8283	11.7995
Cgn	7.21875	6.92483	7.46806	6.83501	6.82648	6.89595	6.99364	7.08308	6.85966	6.82419	6.55145	6.85201
Cgnl1	6.80221	6.99259	6.42548	6.52054	6.52952	6.50678	6.45588	6.43913	6.25467	6.2098	5.90115	5.87968
Cgref1	5.57734	5.57622	5.32153	5.05844	5.28462	5.05844	5.30369	5.30054	5.42043	5.50349	5.62462	5.87968
Cgrrf1	8.90175	8.8078	8.87274	8.68003	8.81358	8.82511	9.01201	9.03219	9.12179	9.15139	9.70285	9.56982
Chac1	8.33895	8.52949	9.01028	8.5627	9.00173	9.10674	8.24951	8.34727	8.37589	8.52071	8.79747	8.81831
Chac2	7.36968	7.4901	7.55	7.40194	7.20724	7.56954	7.45272	7.49132	8.11214	7.91309	8.617	8.60928
Chadl	6.65773	6.64406	7.76226	7.79763	7.98586	7.93436	6.20561	6.34318	6.83078	7.02893	6.98603	7.27886
Chaf1a	12.025	11.9769	11.9606	12.0403	12.0706	12.0325	12.0064	11.9709	11.8681	11.6756	11.311	11.476
Chaf1b	10.8533	10.8985	10.9413	11.0367	11.0214	10.9595	10.9856	11.0692	11.1049	11.0208	11.0424	10.9948
Champ1	9.99539	9.77237	9.84547	9.82332	9.74932	9.93238	9.55925	9.63684	9.65755	9.47318	9.27261	9.52105
Chchd1	9.76305	9.89098	9.77576	9.78663	9.94003	9.86148	10.1065	10.2369	10.3273	10.4109	11.0522	11.2134
Chchd10	11.0261	11.0794	11.3168	11.128	11.297	11.3715	10.9959	11.0887	11.1512	11.1994	11.3914	11.4569
Chchd2	12.8231	12.7663	12.8765	12.6847	12.7469	12.7683	12.7633	12.9102	12.9939	13.1268	13.4509	13.5649
Chchd3	11.7357	11.7233	11.9453	11.928	12.0225	12.0221	11.9274	12.0246	12.1994	12.1935	12.5247	12.386
Chchd4	11.2834	11.3298	11.379	11.4585	11.4975	11.457	11.4567	11.6093	11.8591	12.0374	12.4506	12.3312
Chchd5	8.00375	8.18291	8.04204	8.07034	7.9906	7.99489	7.85031	8.04813	8.03177	8.10699	8.37075	8.30024
Chchd6	9.47522	9.647	9.93018	9.85769	9.80341	9.83804	9.79264	9.84918	10.2114	10.372	10.8281	10.7864
Chchd7	7.88958	8.42313	8.41449	8.49471	8.00942	8.06832	8.06675	8.30017	8.39428	8.64198	8.83098	9.0971
Chd1	11.5397	11.4858	11.5161	11.4491	11.6241	11.6165	11.5479	11.5741	11.6335	11.5627	11.7073	11.7193
Chd1l	10.0162	10.246	10.2319	10.2449	10.0659	10.1419	10.1315	10.2324	10.2717	10.4041	10.3986	10.2058
Chd2	9.21804	8.99818	9.25373	9.02426	9.14089	8.94559	9.01741	8.75758	8.72295	8.69148	8.52254	8.84082
Chd3	11.2199	11.0685	10.9799	11.0942	10.8821	10.854	10.9509	10.607	10.4854	10.4488	9.88862	10.3012
Chd4	13.9127	13.7662	13.7683	13.7794	13.922	13.7812	13.6454	13.4551	13.3342	13.2486	12.8177	13.2529
Chd5	6.05547	6.07822	7.06522	6.80965	7.09257	6.95598	5.8972	5.8523	6.39245	6.33207	6.72119	6.55741
Chd6	10.2828	10.0765	10.047	9.89814	10.0581	9.95162	9.98516	9.76109	9.60176	9.48828	9.38091	9.67162
Chd7	8.84242	8.73209	8.37602	8.22938	8.53055	8.31593	8.3479	8.47214	7.80092	7.88684	7.56565	8.12661
Chd8	11.3823	11.3096	11.2065	11.2314	11.3106	11.2144	11.2708	11.073	10.9397	10.848	10.5096	10.839
Chd9	10.3187	10.1719	10.1079	10.1875	10.0637	9.92266	10.3362	9.98676	9.9175	10.0304	9.38654	9.65182
Chek1	9.97177	9.82687	9.92688	10.008	9.99566	9.99333	9.97827	10.1086	10.2656	10.2332	10.4875	10.1746
Chek2	9.30234	9.22244	9.29783	9.25278	9.30198	9.21557	9.16108	9.30613	9.21463	9.24586	9.73185	9.46026
Cherp	11.5669	11.5905	11.5221	11.5462	11.5114	11.4353	11.2669	11.2174	11.0063	10.984	10.6305	11.1046
Chfr	9.48052	9.49015	9.50223	9.67542	9.54696	9.63361	9.59577	9.60751	9.65566	9.65991	9.71184	9.48692
Chic1	8.92792	8.75413	8.6974	8.60742	8.89833	8.6935	8.81791	8.72568	8.70839	8.88047	8.84334	8.68242
Chic2	9.70388	9.94761	9.87825	9.83343	9.85681	9.92405	9.78633	10.0381	10.1131	10.1624	10.1831	10.2278
Chid1	9.61191	9.52888	9.76842	9.82042	9.74242	9.80969	9.59938	9.73421	9.78045	9.99614	10.2039	10.0769
Chka	8.5534	8.22059	8.47939	8.25133	8.4128	8.32447	8.63966	8.50265	8.29987	8.25709	8.40467	8.57125
Chkb	8.48782	8.62843	8.65399	8.58007	8.5466	8.61938	8.53384	8.56177	8.43479	8.85066	8.77612	8.83122
Chm	8.7158	8.64033	8.56298	8.47997	8.60293	8.67366	8.83641	8.87266	8.95329	9.05607	9.18161	9.12352
Chml	7.72308	7.78108	7.60199	7.30146	7.47385	7.53989	7.42775	7.48349	7.24927	7.3306	7.31982	7.34587
Chmp1a	11.2989	11.2645	11.2126	11.2844	11.288	11.2794	11.4661	11.5435	11.4821	11.55	11.5468	11.4811
Chmp1b	8.73671	8.62843	8.65799	8.33993	8.71214	8.53753	8.5186	8.49508	8.69367	8.71007	8.74129	8.77889
Chmp2a	10.4789	10.7086	10.7534	10.779	10.694	10.8238	10.8963	11.002	11.133	11.3125	11.7129	11.8032
Chmp2b	10.5925	10.5146	10.7224	10.6314	10.7004	10.637	10.8004	10.8232	11.0363	10.9307	11.3395	11.1085
Chmp3	11.1127	11.2284	11.338	11.252	11.1901	11.3545	11.2092	11.2907	11.4174	11.534	11.6408	11.6207
Chmp4b	11.445	11.5021	11.6633	11.6021	11.4781	11.501	11.6481	11.6188	11.7555	11.6619	11.5967	11.6207
Chmp4c	5.71273	5.50745	5.51288	5.7263	5.83342	5.85036	5.70274	6.03886	5.77688	5.78053	5.54955	5.98165
Chmp5	9.98549	10.1095	10.041	9.96533	9.81924	10.0105	10.1178	10.1086	10.2618	10.2673	10.6632	10.5379
[truncated: 10,315 more rows]

## Sheet: DEG_koTraf3_Veh
	log2FC	baseMean	stat	pvalue	padj
C77080	1.12233	1997.2	18.194	5.76005e-74	6.67647e-70
Stum	1.83313	632.342	17.8189	5.0442e-71	2.92337e-67
Nfkb2	1.24	2009	17.562	4.81786e-69	1.86146e-65
Map3k14	1.13539	331.507	14.8321	9.08157e-50	2.63161e-46
Mbp	-1.02321	583.166	-14.3138	1.79352e-46	4.15773e-43
Nfkbie	1.03854	510.118	14.0632	6.3898e-45	1.2344e-41
H2-K1	1.01209	257.318	13.3109	1.99997e-40	3.31166e-37
Tapbp	0.926288	688.633	12.9507	2.32853e-38	3.37375e-35
Carmil2	-0.814212	125.929	-11.539	8.3849e-31	1.07988e-27
Coq8a	0.77319	247.131	10.2709	9.53156e-25	1.1048e-21
Tubb3	0.580044	4678.15	9.86686	5.79503e-23	6.10638e-20
Ttn	0.617246	104.725	9.84635	7.10789e-23	6.86563e-20
Rgs16	0.710064	587.793	9.64494	5.16397e-22	4.60428e-19
Arhgef40	0.703645	742.781	9.5782	9.87549e-22	8.1762e-19
Slc2a6	0.696116	796.725	9.47415	2.68945e-21	2.07823e-18
Relb	0.659427	284.953	9.29114	1.52647e-20	1.10583e-17
Dnm1	0.684678	351.578	9.17564	4.48886e-20	3.06061e-17
Anxa1	0.600754	4914.07	8.73652	2.404e-18	1.54805e-15
Fscn1	-0.647115	187.917	-8.70464	3.18576e-18	1.94348e-15
Dennd2a	0.571795	1291.44	8.63842	5.69965e-18	3.18705e-15
Tnip1	0.601076	1229.38	8.63588	5.82784e-18	3.18705e-15
Chadl	0.610984	136.581	8.63162	6.04909e-18	3.18705e-15
Nfkbia	0.647943	271.456	8.6158	6.94576e-18	3.50036e-15
Entpd2	0.581457	208.491	8.5211	1.58048e-17	7.63307e-15
Rassf4	0.569697	139.36	8.47802	2.29065e-17	1.06204e-14
Plscr1	0.552686	1275.98	8.43355	3.35333e-17	1.49494e-14
Trp53	0.486795	3838.37	8.37603	5.47429e-17	2.35009e-14
Eif2ak3	0.528536	1212.09	8.26966	1.3434e-16	5.56119e-14
Ifngr2	0.550268	1552.44	8.12636	4.42361e-16	1.76807e-13
Mest	-0.575351	898.442	-8.0096	1.15078e-15	4.44624e-13
Btn2a2	0.429973	74.8364	7.87641	3.36912e-15	1.25972e-12
Mvp	0.577342	558.293	7.80684	5.86395e-15	2.12403e-12
Cyfip2	-0.5149	1691.76	-7.69097	1.46029e-14	5.12917e-12
Cxcl10	0.571851	352.364	7.67349	1.67379e-14	5.70615e-12
Ndnf	0.397608	66.6959	7.66059	1.85077e-14	6.05223e-12
Kif26b	-0.553781	102.237	-7.6586	1.87974e-14	6.05223e-12
Arhgdib	0.442264	8559.75	7.54117	4.65774e-14	1.45913e-11
Hmcn1	-0.526098	911.691	-7.45938	8.69296e-14	2.65158e-11
H2-Q4	0.531132	222.784	7.43068	1.08039e-13	3.21096e-11
Capg	0.505274	999.046	7.38784	1.49236e-13	4.23422e-11
Frmpd1	1.07067	214.331	7.38736	1.49774e-13	4.23422e-11
Slc44a3	-0.550035	380.832	-7.33473	2.22163e-13	6.13118e-11
H2-D1	0.460625	1468.65	7.1247	1.04305e-12	2.81164e-10
Col4a1	-0.520793	505.781	-7.08686	1.3719e-12	3.61403e-10
Slc11a2	0.420486	2422.83	6.85924	6.92279e-12	1.78316e-09
Junb	0.493798	442.733	6.77139	1.27552e-11	3.21404e-09
Sema6a	-0.506891	334.771	-6.74772	1.50185e-11	3.70382e-09
Ddx58	0.487413	180.132	6.6812	2.36997e-11	5.72299e-09
Clvs1	-0.491452	575.88	-6.65892	2.7584e-11	6.42268e-09
Anxa4	0.453117	947.72	6.65828	2.77054e-11	6.42268e-09
Ecscr	0.497326	312.767	6.64925	2.94583e-11	6.69511e-09
Psme2	0.472206	621.329	6.63278	3.29415e-11	7.34278e-09
Celsr2	-0.463407	692.227	-6.62123	3.56224e-11	7.79055e-09
Csf1	0.480174	605.93	6.60926	3.86239e-11	8.29055e-09
Kit	0.493072	234.739	6.58937	4.41708e-11	9.30879e-09
Itgb5	-0.435288	1042.72	-6.57265	4.94284e-11	1.02308e-08
Parp3	0.466024	673.573	6.5306	6.55069e-11	1.33209e-08
Psd	0.435003	100.659	6.51027	7.50178e-11	1.49919e-08
Arfgef3	-0.468186	1160.68	-6.50708	7.66269e-11	1.50539e-08
Tgfb1	0.44324	154.293	6.47627	9.40181e-11	1.81627e-08
Limd2	0.45844	1095.01	6.46428	1.0178e-10	1.93399e-08
Cited2	0.374472	4390.65	6.37826	1.79115e-10	3.34858e-08
Ccdc91	0.412677	1240.44	6.35058	2.14508e-10	3.94661e-08
Cyba	0.461617	535.77	6.22187	4.9126e-10	8.76813e-08
Traf2	0.426667	892.657	6.22173	4.91699e-10	8.76813e-08
Enah	-0.434073	1906.42	-6.19563	5.80536e-10	1.01954e-07
Glipr2	0.420833	119.853	6.17564	6.58966e-10	1.14001e-07
Shisa2	-0.413412	77.0132	-5.98494	2.16475e-09	3.68994e-07
Parp12	0.442225	418.688	5.92931	3.04206e-09	5.11021e-07
Cstb	0.410221	1502.07	5.9267	3.09092e-09	5.11812e-07
Ccl9	0.405106	49.8166	5.86566	4.4734e-09	7.30298e-07
Dclk1	0.419192	1382.46	5.75275	8.78039e-09	1.41352e-06
Ctsh	0.387082	126.64	5.73802	9.57879e-09	1.52093e-06
Gjc3	-0.346813	1873.11	-5.70848	1.13988e-08	1.78545e-06
Chd5	0.318101	54.1793	5.69671	1.22141e-08	1.88765e-06
Tspan15	0.424094	335.591	5.67119	1.41809e-08	2.16277e-06
Kif5b	-0.31634	8055.25	-5.6598	1.51551e-08	2.28133e-06
Glis2	0.350468	81.555	5.65663	1.5437e-08	2.29398e-06
Cd9	0.379455	1033.32	5.57785	2.4351e-08	3.57281e-06
Notch1	-0.400394	104.465	-5.55515	2.77375e-08	4.01881e-06
Sord	-0.348538	3955.6	-5.50693	3.65154e-08	5.2253e-06
Neto2	-0.386914	661.839	-5.49036	4.01104e-08	5.66975e-06
Irf1	0.402153	250.609	5.46217	4.70357e-08	6.56856e-06
Angptl2	-0.350386	2105.8	-5.44829	5.08557e-08	7.01748e-06
Ptgds	0.340788	5803.43	5.44601	5.1512e-08	7.02443e-06
Rhbdf1	0.344643	1301.81	5.41047	6.28585e-08	8.47201e-06
Abca12	-0.394417	1241.58	-5.38432	7.27199e-08	9.68846e-06
D630003M21Rik	0.361078	116.416	5.37265	7.75882e-08	1.02196e-05
Cfap54	-0.350136	1683.02	-5.30529	1.12496e-07	1.4651e-05
Kremen1	-0.381946	456.481	-5.2812	1.28343e-07	1.65291e-05
B2m	0.362907	2126.35	5.27282	1.34344e-07	1.71119e-05
Plk2	0.388895	741.599	5.25483	1.48158e-07	1.86156e-05
Src	0.310731	2264.74	5.25334	1.49362e-07	1.86156e-05
Whamm	0.388156	350.076	5.22547	1.73715e-07	2.14205e-05
Phb2	0.279879	14079.1	5.18944	2.10927e-07	2.56369e-05
Sulf2	-0.328423	1969.76	-5.1882	2.12332e-07	2.56369e-05
Ern1	0.369198	557.331	5.17815	2.24103e-07	2.67791e-05
Rasgrp3	-0.343287	2220.42	-5.16444	2.41162e-07	2.85236e-05
Axl	0.354176	214.022	5.14172	2.72236e-07	3.18736e-05
Col4a2	-0.371	561.797	-5.12172	3.02767e-07	3.50937e-05
Tnfrsf9	0.218591	25.4598	5.11454	3.14507e-07	3.60935e-05
Maml3	-0.390214	328.268	-5.10365	3.33157e-07	3.7859e-05
Cib1	0.354093	903.128	5.09866	3.4207e-07	3.84945e-05
Micall2	0.378878	462.261	5.08135	3.74755e-07	4.17671e-05
Ankrd52	-0.293023	3329.86	-5.0745	3.88516e-07	4.28884e-05
Kank4	-0.333695	1008.25	-5.06833	4.01315e-07	4.38835e-05
Bcam	0.322843	84.8235	5.06249	4.1381e-07	4.48268e-05
Adam12	-0.371533	837.5	-5.05141	4.38556e-07	4.70676e-05
Prss12	-0.377512	348.117	-5.00558	5.56951e-07	5.92258e-05
Lgals3	0.243912	1704.72	4.98927	6.06082e-07	6.38645e-05
Wnt10a	0.204221	24.1457	4.98527	6.18741e-07	6.46111e-05
Ngfr	0.211998	24.0754	4.91997	8.65559e-07	8.89062e-05
Mcc	-0.320537	1606.72	-4.91971	8.66742e-07	8.89062e-05
Mmp9	0.181072	25.8302	4.91741	8.76946e-07	8.91639e-05
Ackr3	-0.361046	109.604	-4.91494	8.8808e-07	8.95108e-05
Arl6ip5	0.318534	1307.81	4.90087	9.54115e-07	9.53374e-05
Lipa	-0.270494	3044.26	-4.89769	9.69675e-07	9.60641e-05
Rrad	0.197602	22.8435	4.89083	1.00413e-06	9.86349e-05
Dst	-0.336687	7051.67	-4.87774	1.0731e-06	0.000104523
Cdkn1a	-0.272963	4181.91	-4.84962	1.23696e-06	0.00011948
Tbc1d30	0.299289	86.5992	4.84316	1.27788e-06	0.000122413
Fsd2	0.186881	19.7042	4.83721	1.31675e-06	0.000124711
Cp	0.357737	956.411	4.83621	1.3234e-06	0.000124711
Igf2r	-0.302475	4648	-4.83214	1.35072e-06	0.000126259
Bahcc1	-0.316105	2079.44	-4.82046	1.43225e-06	0.000132007
Pkd1	-0.31182	1269.26	-4.82008	1.43499e-06	0.000132007
Col6a1	0.187931	22.4439	4.81367	1.48182e-06	0.000135189
Dbnl	0.267273	4225.78	4.81218	1.4929e-06	0.000135189
Bcl3	0.177897	29.6654	4.80251	1.56689e-06	0.00014079
Map3k11	0.256059	4507.1	4.76205	1.91632e-06	0.000170862
Tmod1	0.353777	496.148	4.74054	2.13149e-06	0.000188596
Pdia4	0.252843	12950.8	4.73482	2.19251e-06	0.000192526
Cbx7	0.347388	221.017	4.73187	2.22458e-06	0.000193873
Cnih4	0.296965	1293.83	4.72424	2.30974e-06	0.000199792
Eif6	0.279362	4488.97	4.70862	2.49395e-06	0.000214129
Cdh19	-0.311033	1298.94	-4.70653	2.51965e-06	0.000214745
Clstn1	-0.264672	2539.75	-4.69171	2.70929e-06	0.000229222
Zdhhc18	0.325621	808.829	4.67779	2.8998e-06	0.000243562
Il17rc	0.332637	700.178	4.66824	3.03793e-06	0.000253328
Trp53inp1	-0.331758	1073.76	-4.66396	3.10177e-06	0.000256805
Eps8	0.246809	10239.3	4.64801	3.35148e-06	0.00027551
Spr	0.273541	4145.58	4.63811	3.51611e-06	0.000287008
Tenm4	-0.327261	794.806	-4.63109	3.63752e-06	0.000294842
Akap12	-0.297557	1369.64	-4.62057	3.8269e-06	0.000308039
Daam1	0.288581	1686.92	4.54512	5.49048e-06	0.000438898
Zfp36l1	0.285	1226.18	4.54028	5.61786e-06	0.000446004
Zfp704	-0.309372	773.269	-4.53368	5.79659e-06	0.000457063
Mgat4b	0.243701	11079.5	4.52666	5.9924e-06	0.00046931
Gcnt1	-0.338865	140.752	-4.51021	6.47641e-06	0.000503812
Scd1	-0.236427	6593.81	-4.50717	6.56984e-06	0.000507673
Emb	-0.272807	1765.85	-4.5031	6.6969e-06	0.000514042
Lamc1	-0.280968	4585.24	-4.50171	6.74095e-06	0.000514042
Hapln1	-0.296124	67.5832	-4.49869	6.83744e-06	0.000517992
Psmb10	0.329379	474.422	4.49249	7.03945e-06	0.000529833
Rnf144a	-0.300997	917.772	-4.47603	7.60445e-06	0.000568666
Mef2c	-0.270241	1554.44	-4.45726	8.30124e-06	0.000616793
Masp1	-0.27577	2046.18	-4.44729	8.69588e-06	0.000641999
Lmo4	0.300336	948.955	4.44353	8.84935e-06	0.000649195
Rab20	0.333116	209.5	4.43852	9.05802e-06	0.000656748
Rnpep	0.305553	1163.54	4.43834	9.06562e-06	0.000656748
Ctsb	0.2213	8752.73	4.4319	9.34064e-06	0.000669014
Itga4	-0.299572	1622.71	-4.43168	9.35038e-06	0.000669014
Casp4	0.156292	24.1976	4.4214	9.80644e-06	0.00069734
Parp10	0.329965	275.532	4.39341	1.11587e-05	0.000788662
P3h3	0.287425	1244.56	4.37712	1.20257e-05	0.000844081
Zmat3	-0.257263	2999.95	-4.37472	1.21591e-05	0.000844081
Qpct	-0.302643	75.317	-4.37468	1.21613e-05	0.000844081
Maf	0.299184	831.937	4.37205	1.23085e-05	0.000849213
Sdc3	-0.282883	1183.27	-4.36958	1.24487e-05	0.000853807
Nfasc	0.171167	17.6904	4.35917	1.30558e-05	0.000890177
Iqgap2	-0.330473	222.025	-4.33157	1.48049e-05	0.00100353
Sqstm1	0.231028	24090.6	4.32267	1.54151e-05	0.00103882
Podxl2	-0.265565	50.179	-4.32014	1.5593e-05	0.00104473
Cited1	-0.329282	484.103	-4.31483	1.59728e-05	0.00106151
Sdf2l1	0.281607	2239.16	4.31408	1.60266e-05	0.00106151
Snd1	0.217004	10620.2	4.27082	1.94754e-05	0.00128002
Met	0.258151	19973.6	4.27001	1.95465e-05	0.00128002
Ckb	-0.247859	4973.83	-4.26819	1.97065e-05	0.00128325
Sort1	-0.252434	7273.07	-4.25792	2.0634e-05	0.00133614
Adgrl1	-0.291629	984.904	-4.25584	2.08264e-05	0.00134111
Setd7	-0.236362	3521.32	-4.25023	2.13549e-05	0.00136224
Macf1	-0.269886	5466.08	-4.24987	2.13897e-05	0.00136224
Klf6	0.296978	1567.09	4.24522	2.18375e-05	0.00138316
Jdp2	0.308486	658.893	4.23219	2.3143e-05	0.00145788
Rgs3	-0.27933	961.037	-4.20637	2.59507e-05	0.00162591
Armcx4	-0.318081	221.151	-4.20208	2.64472e-05	0.00164811
Cyp2j6	-0.247054	2782.57	-4.18903	2.80143e-05	0.00173644
Il6st	0.247835	2161.5	4.17883	2.93018e-05	0.00180658
Sec61a1	0.206448	13119	4.17559	2.9722e-05	0.00181329
Parvb	-0.245649	4004.68	-4.17557	2.97236e-05	0.00181329
Odf3l1	0.312184	185.785	4.17273	3.0097e-05	0.00182646
Ptpn14	-0.245752	5049.68	-4.15433	3.26239e-05	0.0019695
Pou3f2	-0.125734	8.14559	-4.14696	3.36919e-05	0.00202344
Slc41a2	0.251654	62.1151	4.13875	3.49199e-05	0.00207851
Nfkbib	0.269601	1156.13	4.13778	3.50681e-05	0.00207851
Parp8	0.311231	243.948	4.13727	3.51468e-05	0.00207851
Tet1	-0.314478	191.556	-4.13257	3.58732e-05	0.00211069
Slc4a4	-0.300124	490.543	-4.12275	3.74368e-05	0.00219157
Phldb3	0.288923	629.846	4.11466	3.87753e-05	0.00225851
Itpr3	-0.27913	67.5468	-4.11204	3.92173e-05	0.00227284
Scrn3	-0.312061	314.867	-4.10922	3.96999e-05	0.00228936
Plekha2	0.294211	172.654	4.10757	3.99846e-05	0.00229437
Smad3	0.2967	785.298	4.1063	4.02051e-05	0.00229565
Arf5	0.242419	2877.66	4.1018	4.09947e-05	0.00232926
Pdzrn3	-0.290462	697.181	-4.09769	4.17288e-05	0.00235941
Coa3	0.244147	1708.33	4.06153	4.87528e-05	0.00274318
Dmxl2	-0.235312	5179.15	-4.0594	4.91992e-05	0.00275491
Fuom	0.304552	253.9	4.04869	5.15049e-05	0.00287016
Tnfaip2	0.291185	690.447	4.04494	5.23354e-05	0.00290249
Lrp1	-0.301747	572.557	-4.03841	5.38146e-05	0.00297031
Parp9	0.300025	197.189	4.03698	5.41439e-05	0.00297432
Trib3	0.285257	565.197	4.02764	5.634e-05	0.00308036
Pkp2	0.287673	213.362	4.01895	5.84589e-05	0.0031812
Immt	0.204384	7823.49	4.00994	6.07343e-05	0.00328959
Tmbim1	0.256718	1202.37	4.00663	6.15924e-05	0.00332054
Pfkp	0.256251	1994.01	4.00284	6.25863e-05	0.00335851
Cramp1l	-0.290969	492.612	-3.99634	6.4328e-05	0.00343607
Phf2	-0.284012	1123.61	-3.99344	6.51215e-05	0.00346249
Unc13b	-0.238252	47.3635	-3.96352	7.38523e-05	0.00390878
Htra2	0.261502	3373.49	3.95817	7.5525e-05	0.00397318
Prss23	-0.302043	278.24	-3.95678	7.59666e-05	0.00397318
Rassf2	-0.252142	1146.97	-3.95637	7.60976e-05	0.00397318
Cntn1	-0.231872	39.9964	-3.94429	8.00374e-05	0.00416015
Daam2	-0.281485	548.465	-3.9404	8.13448e-05	0.00420923
Ybx3	0.193324	19747.2	3.93529	8.30955e-05	0.00428071
Chchd3	0.214848	3949.78	3.90331	9.48852e-05	0.00486644
Hist1h1c	-0.295372	377.589	-3.895	9.8197e-05	0.0050141
Wdfy3	-0.2557	1397.11	-3.89088	9.98831e-05	0.00507571
Lpgat1	-0.264013	884.831	-3.88991	0.000100279	0.00507571
Tulp4	-0.218459	3485.25	-3.88167	0.000103742	0.00522813
Ccdc122	0.276764	121.825	3.8732	0.000107413	0.00538974
Sun2	0.253019	986.683	3.86939	0.00010911	0.00545124
Mecom	-0.293619	186.34	-3.86739	0.000110006	0.00547242
Gstp2	-0.271804	660.397	-3.86444	0.000111344	0.00551532
Thbs3	0.271963	582.566	3.85632	0.000115105	0.00567739
Fryl	-0.267567	1316.73	-3.84046	0.000122803	0.00603141
Tbc1d10a	0.261052	746.314	3.83428	0.000125933	0.00614633
Ptp4a3	-0.262635	1227.68	-3.83352	0.000126321	0.00614633
Erap1	0.287537	308.963	3.83272	0.000126734	0.00614633
Acot1	-0.275838	492.081	-3.8239	0.000131358	0.00633266
Sdc4	0.252464	1328.55	3.82294	0.000131869	0.00633266
Birc3	0.215575	71.0285	3.8223	0.000132215	0.00633266
Irf5	0.118846	14.0944	3.81329	0.000137128	0.0065381
Rras	0.260012	103.55	3.81238	0.000137632	0.0065381
Sdk1	-0.289867	215.367	-3.80271	0.000143119	0.00675778
Tmlhe	0.251053	89.6712	3.80219	0.000143423	0.00675778
Wnt6	0.191179	50.7726	3.79532	0.000147452	0.00691948
Ttyh3	-0.23099	1916.24	-3.78444	0.000154058	0.00720033
Lats2	-0.247155	1271.07	-3.77134	0.000162373	0.00755851
Tmem245	-0.26749	2818.2	-3.76985	0.000163345	0.00757331
Pdgfb	0.11405	14.6272	3.76494	0.00016659	0.00769301
Pbxip1	-0.259468	1143.99	-3.76044	0.000169616	0.00780167
Scube3	0.264016	119.401	3.75561	0.000172918	0.00789288
Smim14	0.262401	634.332	3.75507	0.000173291	0.00789288
Kmt2d	-0.255062	2382.01	-3.75457	0.000173642	0.00789288
2810474O19Rik	0.278714	428.074	3.74753	0.000178583	0.00805776
Itgb1bp1	0.248338	933.174	3.74742	0.00017866	0.00805776
Snx25	-0.253222	819.543	-3.73648	0.000186613	0.00838384
Aldh1a3	-0.282905	162.853	-3.73444	0.000188136	0.00840553
Gm11808	-0.261947	116.931	-3.73355	0.000188797	0.00840553
Rab3a	-0.282701	162.811	-3.73292	0.000189271	0.00840553
Zfr	-0.211014	4979.03	-3.7175	0.000201206	0.00888347
Chac1	0.277149	396.949	3.71705	0.000201566	0.00888347
Smurf1	0.24877	1576.86	3.71507	0.000203147	0.00891925
Mbnl2	-0.231015	2659.98	-3.71378	0.000204184	0.00893094
Plagl1	-0.221903	5671.75	-3.70802	0.00020889	0.00910243
Stx11	0.270216	200.532	3.70604	0.000210529	0.00913946
Fam84b	0.275712	527.139	3.70166	0.000214196	0.00926399
Mocos	0.16561	30.544	3.68963	0.000224583	0.00967712
Cpne4	-0.273003	393.279	-3.68809	0.000225941	0.00969957
C530008M17Rik	-0.243637	888.87	-3.68393	0.000229663	0.00982297
Tsen2	0.24674	979.886	3.67975	0.000233461	0.00994872
Ddah1	-0.279711	246.13	-3.67485	0.00023799	0.0101046
Itpkb	-0.236505	1536.63	-3.66086	0.000251367	0.0106335
Tnfrsf19	-0.277964	298.849	-3.65568	0.000256505	0.0108114
St7	0.245059	853.127	3.64773	0.000264562	0.0111107
Rflnb	0.265176	174.398	3.64628	0.000266064	0.0111334
Ankrd50	-0.225073	1787.18	-3.63935	0.000273324	0.0113562
Inpp4b	-0.274584	541.401	-3.63933	0.000273348	0.0113562
Vamp5	0.266721	258.639	3.63386	0.000279208	0.0115582
Tnik	-0.273503	349.194	-3.63047	0.000282903	0.0116396
Klhl30	-0.240319	1033.88	-3.63005	0.000283362	0.0116396
Nmi	0.272984	271.826	3.6293	0.000284188	0.0116396
Sh3d19	0.25971	622.318	3.61936	0.000295332	0.0120264
Chd7	-0.27442	319.425	-3.61903	0.000295706	0.0120264
Slc7a8	-0.190431	30.338	-3.61553	0.000299729	0.0121474
Rev3l	-0.256846	931.621	-3.61134	0.000304621	0.0122815
Tns2	-0.227437	1241.21	-3.61088	0.000305157	0.0122815
Dync2h1	-0.275629	437.166	-3.60785	0.00030875	0.0123831
Frzb	-0.2545	564.451	-3.59935	0.000319008	0.0127504
Tpi1	0.19276	20176.3	3.59082	0.000329635	0.0131299
Trim25	-0.272758	289.978	-3.58945	0.000331373	0.0131539
Crbn	0.247729	682.263	3.58568	0.000336201	0.0133
Fh1	0.208164	2964.12	3.57864	0.000345383	0.0136168
Hpgds	-0.270691	251.098	-3.57527	0.000349867	0.0137468
Hlf	-0.178217	26.4816	-3.57031	0.000356557	0.0139624
St3gal4	-0.229256	1465.78	-3.55868	0.000372716	0.014546
Stau2	-0.266484	326.382	-3.53784	0.000403417	0.0156849
Man1a	0.265033	362.986	3.53706	0.000404607	0.0156849
Fgf1	-0.239321	116.765	-3.53353	0.000410044	0.0158427
Dhrs7b	0.235755	1388.81	3.5318	0.000412734	0.0158937
Stat1	0.252077	970.349	3.5273	0.000419829	0.0160866
Casc4	-0.228858	1190.89	-3.52686	0.000420519	0.0160866
Ifrd1	0.201373	2389.91	3.52244	0.000427593	0.0163034
Megf8	-0.223137	3138.55	-3.52049	0.000430747	0.0163698
Neo1	-0.224186	2813.24	-3.51745	0.000435714	0.0165044
Mtmr14	0.234659	932.954	3.51535	0.000439178	0.0165691
Nav1	-0.225663	2505.5	-3.51468	0.000440279	0.0165691
Rpn1	0.200662	16563.2	3.5135	0.000442253	0.0165891
Svil	-0.267854	287.271	-3.51206	0.000444646	0.0165891
Ptprd	-0.241406	106.726	-3.51179	0.000445104	0.0165891
Csnk1e	-0.228628	1683.33	-3.50754	0.000452277	0.0167446
Rcn3	0.191651	51.6981	3.50725	0.00045276	0.0167446
Tdrkh	-0.229008	1070.42	-3.50675	0.000453611	0.0167446
Rpia	0.252636	585.771	3.50538	0.000455958	0.0167778
Suclg1	0.211166	2311.59	3.50355	0.000459102	0.01684
Top2b	-0.212115	2864.03	-3.49977	0.000465668	0.017016
Ssfa2	-0.217677	1828.43	-3.49814	0.000468515	0.017016
Myh14	-0.204676	66.2816	-3.49777	0.000469166	0.017016
Crim1	-0.217422	1304.74	-3.49743	0.00046977	0.017016
Glrb	-0.205884	4106.44	-3.48468	0.000492718	0.0177916
Megf6	-0.226414	1318.65	-3.48173	0.000498188	0.0179332
Ifitm3	0.258451	332.565	3.47273	0.000515199	0.0184882
Gdf11	-0.246303	566.3	-3.47047	0.00051954	0.0185864
Ptch1	-0.250027	764.751	-3.46819	0.000523969	0.0186872
Bcar1	0.199762	2055.4	3.46476	0.000530711	0.0188695
Tnfrsf14	0.0634817	6.16647	3.46012	0.000539934	0.0190897
Hectd4	-0.250138	1046.33	-3.45976	0.000540661	0.0190897
Bcar3	-0.213655	50.4355	-3.45917	0.000541843	0.0190897
Rabac1	0.222378	1152.64	3.4499	0.000560793	0.0196974
Ash1l	-0.22915	1825.31	-3.44274	0.000575842	0.0201649
Bdh1	0.211765	2056.09	3.44025	0.000581187	0.0202908
Oaf	0.250053	600.447	3.43642	0.000589458	0.0205177
Mr1	-0.252976	405.209	-3.43215	0.000598807	0.0206245
Timm8a1	0.246107	691.442	3.43185	0.000599487	0.0206245
Eno2	0.23218	116.545	3.43183	0.000599533	0.0206245
Lama5	-0.260712	212.629	-3.43178	0.000599643	0.0206245
Adam9	-0.189731	6342.02	-3.42908	0.000605628	0.0207688
Gja3	-0.246694	133.274	-3.42535	0.000614009	0.020994
Ubr4	-0.237605	4291.55	-3.423	0.000619342	0.0210167
S100b	-0.256125	422.602	-3.42214	0.000621314	0.0210167
Filip1	-0.230343	993.209	-3.42142	0.000622943	0.0210167
Col18a1	0.0836725	13.9643	3.42044	0.000625208	0.0210167
Ticrr	-0.215796	1101.46	-3.42041	0.000625268	0.0210167
Plin2	0.204468	1798.32	3.42029	0.000625552	0.0210167
Tmcc3	-0.259029	289.566	-3.41864	0.000629338	0.0210828
Dock11	-0.246714	767.025	-3.4139	0.000640397	0.0213711
Vps37c	0.245441	565.522	3.41338	0.000641632	0.0213711
Lat	0.123943	19.2566	3.4109	0.000647499	0.0214472
Fam49a	0.252537	358.848	3.41085	0.000647618	0.0214472
Adamts4	-0.242836	601.701	-3.40914	0.000651675	0.0215201
Zyx	0.21976	2072.76	3.40243	0.000667895	0.0219627
Kmt2a	-0.226134	1263.71	-3.40203	0.000668868	0.0219627
Tbc1d4	0.235958	1064.04	3.3949	0.000686539	0.0224793
Sema3b	0.212918	1458.67	3.38695	0.000706755	0.0230761
Eif4ebp2	-0.191168	7054.92	-3.38481	0.000712286	0.0231913
Alcam	-0.249227	481.45	-3.38284	0.000717398	0.0232923
Ccl2	0.0614904	5.70991	3.38104	0.000722111	0.0233798
Hdhd5	0.253348	354.521	3.37413	0.000740483	0.0239079
Chrac1	0.228285	790.387	3.36976	0.000752331	0.024223
Use1	0.237283	959.468	3.36887	0.000754777	0.0242344
Rab11fip4	-0.232367	905.733	-3.36603	0.000762587	0.0243889
Bola3	0.243336	1528.98	3.36559	0.000763798	0.0243889
Tmem189	-0.18116	5195.65	-3.36319	0.000770468	0.0245343
P4hb	0.177003	26213.3	3.35904	0.000782145	0.0248379
Ppp1r16a	0.237824	845.573	3.35678	0.000788551	0.0249729
Asap2	-0.242781	471.806	-3.35281	0.00079996	0.0252652
Bod1	0.216087	1666.66	3.35152	0.000803696	0.0252842
Cd44	0.210084	8072.25	3.35103	0.000805108	0.0252842
Nqo1	0.24733	166.766	3.34947	0.000809654	0.0252842
Adam23	-0.251174	173.605	-3.34897	0.000811139	0.0252842
Mrps16	0.239905	619.194	3.34885	0.000811467	0.0252842
Mthfd2	0.181829	4651.14	3.34612	0.000819504	0.0254661
Spen	-0.210588	4263.48	-3.34423	0.000825124	0.0255722
Rnasel	0.248295	173.642	3.34138	0.000833639	0.0257672
Deptor	-0.21424	1074.08	-3.33725	0.000846129	0.0260837
Abtb2	0.243804	494.327	3.33616	0.000849433	0.0261161
Cyp39a1	-0.228905	979.893	-3.32789	0.000875071	0.0268332
Col5a3	-0.253318	287.565	-3.32423	0.000886625	0.0271158
Slc12a7	-0.210658	5066.29	-3.31865	0.000904527	0.0275603
Chchd6	0.22707	846.586	3.31823	0.000905915	0.0275603
Cd74	0.05784	5.44384	3.31713	0.000909469	0.0275959
Ltbp3	-0.208693	1245.19	-3.31549	0.000914837	0.0276864
Edf1	0.226452	2876.47	3.30741	0.000941631	0.028423
Mdn1	-0.230808	1993.35	-3.30622	0.000945629	0.0284696
Hspa5	0.163332	35732.9	3.30452	0.000951401	0.0285692
Olfm1	0.239928	143.774	3.30113	0.000962979	0.0288421
Ston1	-0.225525	708.102	-3.29844	0.000972235	0.0290443
Adgrg1	-0.205847	2510.8	-3.2969	0.000977581	0.0290651
Stard3	-0.225595	716.21	-3.29666	0.000978419	0.0290651
Rreb1	-0.231891	754.035	-3.29608	0.000980454	0.0290651
Ip6k3	0.183111	53.1085	3.29129	0.000997305	0.0294892
Dpy19l1	0.215709	1615.04	3.28768	0.00101018	0.0297839
Scn1a	-0.249471	195.546	-3.28705	0.00101241	0.0297839
Gas7	-0.224362	990.844	-3.2843	0.00102234	0.03
Tmem68	-0.242599	448.673	-3.27938	0.00104035	0.0303904
Trf	-0.199529	2936.57	-3.27907	0.00104151	0.0303904
Rnd1	0.145447	27.7878	3.27786	0.00104597	0.0303904
Creg1	-0.218582	984.814	-3.27782	0.00104614	0.0303904
Cd276	-0.248999	203.012	-3.27463	0.00105799	0.030658
Susd6	-0.199472	1490.61	-3.2684	0.00108159	0.0311545
Hunk	-0.249034	235.838	-3.26801	0.00108306	0.0311545
Myadm	0.215453	3728.44	3.26798	0.00108319	0.0311545
Zfp821	-0.24718	186.119	-3.2655	0.00109271	0.0313074
Ptcd3	0.180517	2948.74	3.26519	0.00109391	0.0313074
Faah	-0.244894	154.129	-3.25918	0.00111734	0.0318993
Mrpl38	0.214481	1546.06	3.25782	0.00112273	0.0319107
Klhdc7a	-0.143122	18.2016	-3.25769	0.00112325	0.0319107
Lysmd2	-0.14703	20.9557	-3.25285	0.00114252	0.0323347
Lmo1	-0.237302	223.114	-3.25255	0.00114375	0.0323347
Dcdc2a	-0.243716	294.751	-3.2419	0.00118736	0.0334208
Abcb1b	0.229126	904.255	3.24112	0.0011906	0.0334208
Tead1	-0.205295	2182.07	-3.24107	0.00119082	0.0334208
Emg1	0.194969	3414.47	3.23739	0.00120628	0.0337729
Kat2b	-0.203579	1294.39	-3.223	0.00126854	0.0353083
Mllt11	-0.240618	405.998	-3.223	0.00126855	0.0353083
Foxo3	0.217076	1286.63	3.22262	0.00127026	0.0353083
Xrn1	-0.224894	776.736	-3.21919	0.00128551	0.0355828
Fat1	-0.217963	4153.69	-3.21903	0.00128627	0.0355828
Med13l	-0.217456	944.817	-3.21739	0.00129363	0.035643
Isyna1	0.232027	816.866	3.21717	0.0012946	0.035643
Prkci	-0.187978	2547.56	-3.21521	0.0013035	0.0358029
Mmp15	-0.219503	77.8755	-3.21215	0.00131745	0.0361005
Pan2	-0.239977	355.156	-3.21056	0.00132479	0.0362161
Nfu1	0.232091	1717.95	3.20818	0.00133579	0.0364175
Pknox2	-0.214984	72.9158	-3.20761	0.00133844	0.0364175
Prkcz	-0.218811	81.7248	-3.20669	0.0013427	0.036448
Igfbp7	0.127688	28.8405	3.20189	0.00136529	0.0369745
Dcaf13	0.190267	1833.27	3.19947	0.00137679	0.037167
Gm3448	0.105419	16.7355	3.19905	0.00137881	0.037167
Dync1h1	-0.225674	9427.69	-3.19811	0.00138329	0.0372012
Zfp317	-0.240196	308.486	-3.19557	0.00139556	0.0374322
Atad1	-0.201167	1720.87	-3.19445	0.00140096	0.0374322
Rap2b	-0.17621	3553.18	-3.19433	0.00140157	0.0374322
Atp2b1	-0.193265	2145.88	-3.19309	0.00140758	0.0374921
Serbp1	0.163488	26725.3	3.19254	0.00141028	0.0374921
C1ql3	0.22569	170.499	3.19001	0.00142266	0.0377346
Fads6	-0.227651	106.697	-3.18845	0.00143039	0.0378452
Arhgap32	-0.231499	685.587	-3.18785	0.00143336	0.0378452
Ctnnbip1	-0.241867	187.896	-3.18435	0.00145078	0.0382182
Parp14	0.190106	66.1997	3.18327	0.00145622	0.0382745
Abca1	0.238738	312.188	3.17678	0.00148919	0.0390524
Carmil3	0.200135	74.734	3.17456	0.00150063	0.0392638
Atp7a	-0.210151	1106.75	-3.17129	0.00151762	0.0396188
Atf7	-0.213392	1221.25	-3.16447	0.00155365	0.0404683
Atp6v1f	0.205778	3111.46	3.15955	0.00158011	0.0410651
Ier2	0.221483	717.489	3.15712	0.00159338	0.0412606
Bod1l	-0.209752	1100.62	-3.15687	0.00159475	0.0412606
Sertad4	0.072592	10.9156	3.15465	0.00160693	0.0414831
Dnpep	0.219258	744.475	3.15366	0.00161236	0.0415308
Zmiz1	0.224064	624.517	3.15008	0.00163225	0.0419499
Eif2s2	0.179001	8647.9	3.14255	0.00167481	0.0429485
Chn1	-0.23367	186.973	-3.14045	0.0016869	0.0430902
Syn1	-0.0837009	6.44017	-3.1403	0.00168777	0.0430902
Pomgnt1	0.208654	1781.54	3.1347	0.00172028	0.0438237
Asns	0.185221	3287.11	3.12938	0.00175174	0.0444486
Fgd4	-0.219957	880.831	-3.12926	0.00175248	0.0444486
Mogs	0.176947	4232.39	3.12761	0.00176235	0.0445206
Tapbpl	0.219922	116.298	3.1275	0.001763	0.0445206
Litaf	0.172775	3334.03	3.12584	0.001773	0.0446757
Cltb	-0.193757	1612.25	-3.12468	0.00177999	0.0447546
Wdr26	-0.200892	3436.09	-3.12356	0.00178677	0.0448278
Lactb	0.19972	1542.32	3.1202	0.00180728	0.0452446
Cct4	0.170262	9349.67	3.11877	0.00181611	0.0453116
Med13	-0.206703	2332.76	-3.11844	0.00181813	0.0453116
Prkg2	0.159921	64.1508	3.11786	0.00182169	0.0453116
Tnfaip3	0.131056	22.4496	3.11325	0.00185039	0.0459269
Rhbdf2	0.225701	495.393	3.11142	0.00186192	0.0461145
Scarf1	-0.137113	19.1662	-3.11058	0.0018672	0.0461465
Hpse	0.228711	189.879	3.10978	0.00187225	0.0461728
Tob1	-0.223986	988.997	-3.10317	0.00191463	0.0470227
Zfp532	-0.229292	444.072	-3.10313	0.00191482	0.0470227
Herc1	-0.226658	1260.25	-3.10146	0.00192569	0.0471896
P3h2	0.218535	752.249	3.098	0.00194833	0.0476437
Ppargc1a	0.231415	734.09	3.09723	0.00195336	0.0476661
Mrpl53	0.20054	1551.25	3.09381	0.00197606	0.0480254
Atf3	0.203034	107.945	3.09376	0.00197637	0.0480254
Cd320	0.222613	708.231	3.09284	0.00198254	0.0480744
Nfic	0.16816	4361.13	3.09156	0.00199108	0.0480805
Plp1	-0.22582	487.538	-3.09156	0.00199108	0.0480805
Syt9	-0.214214	846.272	-3.08928	0.00200642	0.0483501
Ccdc115	0.215035	783.654	3.08717	0.00202073	0.0485941
Gprc5b	0.22289	525.531	3.08218	0.00205489	0.0493131
Get4	0.184604	3044.7	3.07828	0.00208202	0.0498609
Ak5	-0.150894	28.8747	-3.07577	0.00209962	0.0501788
C2cd5	0.210388	955.158	3.07408	0.00211152	0.0503594
Ankrd34a	-0.232915	179.733	-3.07278	0.00212075	0.0504755
Marcksl1	-0.173437	2395.01	-3.06947	0.00214438	0.0509333
Polk	-0.227827	410.267	-3.06822	0.00215337	0.0510424
Ptprm	-0.199742	2096.24	-3.0676	0.00215783	0.0510437
Gm13889	0.192844	75.1037	3.06254	0.0021947	0.0518101
Akr1b8	0.196427	1100.34	3.05967	0.00221578	0.0522015
Rhobtb3	-0.205749	1279.53	-3.05879	0.0022223	0.0522488
Bcat1	0.185447	2629.95	3.04824	0.00230184	0.0540094
Atf4	0.197744	6212.09	3.04346	0.00233871	0.0547636
Dkk3	-0.218614	889.289	-3.0424	0.00234698	0.0548464
Elf1	-0.223219	391.895	-3.03774	0.00238361	0.0555904
Adgra3	-0.187961	2726.62	-3.03287	0.0024224	0.0563815
Pou2f1	-0.222021	710.577	-3.03068	0.00244	0.0566774
Tnfrsf22	-0.227679	300.617	-3.02829	0.00245942	0.0570143
Creld2	0.185864	1925.71	3.02387	0.00249565	0.0575457
Mlf2	0.173169	14145.5	3.02369	0.0024971	0.0575457
Rgs19	0.213831	633.602	3.02368	0.00249724	0.0575457
B9d2	0.22619	216.783	3.02199	0.00251123	0.0577533
Lhfp	0.220832	487.129	3.0177	0.00254697	0.0584593
Pck2	0.202177	922.71	3.01442	0.00257467	0.0589783
Chst11	-0.194064	59.3105	-3.01355	0.00258211	0.059032
Armcx1	-0.229086	216.214	-3.01082	0.00260545	0.0594483
Rbm20	-0.188527	1225.18	-3.00919	0.00261949	0.0595679
Ifi35	0.218235	134.504	3.00901	0.00262097	0.0595679
Cars	0.18718	2496.05	3.00581	0.00264877	0.0600819
Acadvl	0.201504	1112.03	3.00259	0.00267694	0.0605052
Ahnak	0.219693	297.832	3.00248	0.00267787	0.0605052
Lancl2	0.210992	1026.06	2.99847	0.00271343	0.0611894
Dot1l	-0.175395	2747.42	-2.9975	0.00272206	0.0612649
Pdia6	0.163372	12930.7	2.99618	0.00273386	0.0614112
Bid	0.223581	404.851	2.99348	0.00275815	0.061837
Alkbh7	0.221613	602.943	2.98631	0.00282362	0.0631825
Ago2	-0.182394	6423.07	-2.98434	0.00284191	0.0633825
Cep162	0.222279	627.375	2.98411	0.00284404	0.0633825
Dusp6	-0.188723	1975.31	-2.98358	0.00284896	0.0633825
Cops3	0.169126	2682.68	2.98228	0.00286113	0.0635157
Ephb4	0.203329	849.848	2.98177	0.00286591	0.0635157
Etv4	-0.209538	110.096	-2.98036	0.0028791	0.0635977
Rap1gap	0.222578	193.715	2.9802	0.00288058	0.0635977
Adam17	0.178959	1938.65	2.97841	0.00289753	0.0638503
Raf1	0.171285	3450.05	2.97746	0.0029065	0.0639264
Stat3	0.201148	1481.77	2.97648	0.00291578	0.0640092
mt-Co3	0.196893	16139	2.97466	0.00293313	0.0641901
Cald1	0.19994	3916.94	2.97445	0.0029351	0.0641901
Npdc1	0.183896	1336.43	2.97369	0.00294241	0.0642288
Npr3	-0.196752	73.668	-2.9714	0.00296449	0.0645052
Nnt	-0.169977	2063.22	-2.97122	0.0029662	0.0645052
Vamp8	0.195911	1450.4	2.96805	0.002997	0.0650529
Kat6a	-0.196794	1514.7	-2.96604	0.00301663	0.0653565
Zfp346	-0.203584	820.778	-2.9648	0.00302875	0.0654712
Fasn	-0.17203	30521.2	-2.96435	0.00303322	0.0654712
H2afx	-0.192922	1942.57	-2.96193	0.00305717	0.0658656
Gcat	0.193403	911.012	2.95233	0.00315381	0.0678216
Herpud1	0.182995	1693.65	2.95007	0.00317704	0.0680812
Phlpp1	-0.221903	541.984	-2.95001	0.00317763	0.0680812
Pycard	0.211648	551.42	2.94874	0.00319069	0.0682349
Prodh	0.202461	1099.79	2.9462	0.00321704	0.0685542
Arpc4	0.189236	6352.27	2.94616	0.00321745	0.0685542
Aldh1l2	0.211971	1238.91	2.94069	0.00327479	0.0696259
Zc3hav1	0.191962	3699.15	2.94	0.00328212	0.0696259
Stx8	0.202809	807.049	2.93966	0.00328577	0.0696259
Lrig1	0.0764941	8.17163	2.93864	0.00329651	0.0697259
Crocc	-0.214849	1712.46	-2.9342	0.00334411	0.070604
Hscb	0.220238	250.993	2.93145	0.00337381	0.0709383
Mad2l1	0.17623	3542.9	2.93126	0.00337591	0.0709383
Akap13	-0.216692	446.444	-2.93078	0.00338108	0.0709383
0610010K14Rik	0.209986	600.641	2.93011	0.00338843	0.0709383
Tnrc6b	-0.197725	1460.8	-2.92991	0.00339063	0.0709383
Coro2b	-0.210057	571.893	-2.92935	0.00339666	0.0709383
Stom	-0.218584	322.449	-2.92399	0.00345578	0.0719632
Gpnmb	0.14188	92063.3	2.92377	0.00345816	0.0719632
Lrch4	0.179119	1454.79	2.9227	0.00347013	0.072083
Lrp5	-0.201255	981.546	-2.92031	0.00349682	0.072439
Ddx56	0.171392	2508.19	2.92005	0.00349977	0.072439
Mgat5	-0.173879	7854.05	-2.91775	0.00352568	0.0728452
Bcl7c	0.189322	1185.61	2.91349	0.00357411	0.0737144
Cdon	-0.203656	988.957	-2.91056	0.00360781	0.0742774
Cadm4	0.188567	1609.43	2.90854	0.00363125	0.0746274
Srxn1	0.168195	2545.79	2.90631	0.00365715	0.0750266
Kank1	-0.212348	532.824	-2.9035	0.00369021	0.075571
Chchd10	0.18232	2417.97	2.90182	0.00370998	0.0758418
Dgkh	-0.218749	168.25	-2.8994	0.00373873	0.076295
Mrpl19	0.167164	2392.61	2.89836	0.00375115	0.0764141
Smg7	-0.170083	1922.56	-2.89472	0.00379492	0.07717
Tmem56	-0.194261	1087.91	-2.89354	0.0038093	0.0773268
Spire1	-0.184543	1016.98	-2.89065	0.00384451	0.0779051
Irf2bpl	-0.175505	1791.91	-2.88973	0.00385573	0.0779934
Tmem131l	-0.204401	842.717	-2.88919	0.00386232	0.0779934
Itga8	0.160289	42.9585	2.8864	0.00389677	0.078552
2020-03-06	-0.168125	2416.25	-2.88559	0.00390677	0.078617
Fry	-0.214044	146.668	-2.88501	0.00391396	0.0786251
Tnks	-0.186135	2725.32	-2.88422	0.0039239	0.0786884
Spcs2	0.150904	5564.32	2.88254	0.00394488	0.0789725
Retsat	0.178601	1439.35	2.87779	0.00400468	0.0799052
Foxr2	-0.209185	829.181	-2.87712	0.00401329	0.0799052
Nid2	-0.0723492	5.75453	-2.87705	0.00401417	0.0799052
Tmem2	-0.208711	449.37	-2.87666	0.00401904	0.0799052
Sec13	0.169253	4098.1	2.87545	0.00403446	0.0800744
Endog	0.21197	192.475	2.87424	0.00405007	0.0802469
Ampd3	0.203315	113.95	2.87051	0.00409806	0.0810591
Specc1	-0.196768	959.412	-2.86942	0.00411229	0.0812019
Apba3	0.204775	813.267	2.85919	0.00424727	0.0837215
Epb41l4a	0.214956	290.538	2.85866	0.00425433	0.0837215
Zfp142	-0.200721	684.132	-2.8572	0.00427397	0.0839654
Limch1	-0.150954	4563.73	-2.85342	0.00432513	0.0848268
Ppp1r35	0.213439	381.793	2.8487	0.00438989	0.0858409
Fosl2	0.213423	285.077	2.84857	0.00439165	0.0858409
Itga6	-0.185295	3072.99	-2.84775	0.00440292	0.0859163
Ifrd2	0.171529	2140.02	2.84322	0.00446601	0.0870009
Rfc4	0.183163	1186.57	2.84197	0.00448362	0.0870955
Arf6	0.162903	4522.05	2.84129	0.00449315	0.0870955
Hapln4	-0.0918814	8.97319	-2.84127	0.00449341	0.0870955
Crabp2	-0.17061	48.2688	-2.84051	0.00450421	0.0871592
Pyroxd1	0.208534	433.981	2.83954	0.00451785	0.0872773
Bmpr2	-0.20317	1910.26	-2.83845	0.00453328	0.0874297
Kcmf1	0.155382	4733.84	2.83641	0.00456243	0.0878458
Elac2	0.194168	1109.18	2.83239	0.00462019	0.0888103
Mme	-0.207248	131.874	-2.83134	0.00463539	0.088955
Slc6a17	-0.184823	1569.44	-2.83052	0.00464718	0.0890339
Akt3	-0.207666	405.325	-2.82928	0.00466524	0.0892323
Tnfaip8	0.208362	434.445	2.82468	0.00473283	0.090376
Gprin1	-0.0534103	3.29193	-2.82355	0.00474946	1
Rpl32	0.189144	29156.4	2.8224	0.00476657	0.0908706
Syt4	-0.163708	9750.92	-2.82147	0.00478046	0.0909858
Lsm5	0.196512	1023.38	2.81539	0.00487178	0.0925718
Trpv2	0.18435	1042.52	2.81014	0.00495197	0.0939416
Cspg4	0.209322	263.455	2.80848	0.0049776	0.094218
Dag1	-0.154819	7712.27	-2.80814	0.0049828	0.094218
Wdr66	-0.10727	12.352	-2.80609	0.00501466	0.0945556
Pon3	0.211016	210.835	2.80562	0.00502203	0.0945556
Cdkn1b	0.178098	1364.53	2.80542	0.00502513	0.0945556
Odc1	0.156227	12101.4	2.80384	0.00504985	0.0948668
Rack1	0.139846	29194.8	2.80258	0.00506959	0.0950836
Zfp282	0.181587	1463.37	2.80188	0.00508065	0.095137
Ep300	-0.180535	1993.26	-2.80126	0.00509034	0.0951647
Twf1	0.159936	2698.5	2.79949	0.00511832	0.0954916
Pcdh17	-0.211534	186.081	-2.79911	0.0051243	0.0954916
Stxbp2	0.180673	1395.34	2.79783	0.00514464	0.0957168
Phtf2	-0.207487	365.916	-2.79485	0.00519242	0.0962137
Prkd3	-0.180911	1302.58	-2.79447	0.00519852	0.0962137
Ankrd12	-0.203374	489.24	-2.79444	0.00519899	0.0962137
Srm	0.155064	3580.55	2.79396	0.00520676	0.0962137
Dbn1	-0.184949	981.628	-2.79358	0.00521285	0.0962137
Cct7	0.138478	23318.5	2.79226	0.00523411	0.0963456
Pikfyve	-0.180123	1751.31	-2.79166	0.00524379	0.0963456
Atp13a3	-0.168023	5277.26	-2.79159	0.00524494	0.0963456
Manf	0.175839	5192.24	2.79101	0.00525441	0.0963669
Cd72	0.0899848	19.5353	2.78996	0.00527145	0.0964964
Surf4	0.161632	6759.56	2.78955	0.00527812	0.0964964
Spry4	-0.205262	124.585	-2.78871	0.00529185	0.0965596
Etv6	0.193272	1046.47	2.78832	0.00529824	0.0965596
Ndufa9	0.162107	4182.67	2.78451	0.0053608	0.0975065
Slc39a1	0.163908	3478.22	2.7837	0.00537432	0.0975065
Pip5k1b	0.208938	220.618	2.78363	0.00537544	0.0975065
Sdcbp	-0.155025	10287.8	-2.78275	0.00538999	0.0975184
Abca2	0.176804	1493.09	2.78183	0.00540531	0.0975184
Cdkn2aipnl	0.165691	2944.19	2.78174	0.00540684	0.0975184
Pag1	-0.205353	130.454	-2.78137	0.005413	0.0975184
Pik3r3	-0.180661	2156.67	-2.78066	0.00542485	0.0975184
Crip2	-0.184245	2869.35	-2.78056	0.00542657	0.0975184
Bace1	-0.188409	938.004	-2.7797	0.00544098	0.097626
Rere	-0.164717	2288.11	-2.77866	0.0054584	0.0977873
Prkar2b	-0.176746	1627.19	-2.77734	0.00548057	0.0980328
Sucnr1	-0.153544	37.4785	-2.77516	0.0055175	0.0984193
Snrnp27	0.173488	1418.84	2.77506	0.00551916	0.0984193
Gpkow	0.181864	1029.29	2.77276	0.00555828	0.0989648
Trio	-0.165885	2505.79	-2.77062	0.00559499	0.0992602
Gars	0.15518	11585.6	2.77043	0.00559821	0.0992602
Pstk	0.201814	472.441	2.77029	0.00560057	0.0992602
Evl	-0.175496	1347.31	-2.76877	0.0056268	0.0995729
Nemp1	-0.204044	494.307	-2.76724	0.00565338	0.0997438
Bphl	-0.210428	252.218	-2.76715	0.00565493	0.0997438
Tcf7l2	-0.208986	280.061	-2.76634	0.00566895	0.0997438
Ptk2b	-0.193605	87.985	-2.76623	0.00567088	0.0997438
Akap7	0.201194	500.001	2.76507	0.00569108	0.0999475
Prrc2b	-0.166269	8241.41	-2.76349	0.0057187	0.100281
Mtss1l	0.182217	1858.12	2.76009	0.00577862	0.101178
Adamts12	-0.208948	341.075	-2.75934	0.0057918	0.101256
Mrpl58	0.169535	1495	2.75884	0.00580063	0.101258
Bms1	0.149897	5086.1	2.75768	0.00582127	0.101465
Ezr	0.168864	2169.59	2.75673	0.00583832	0.10161
Bcl7a	-0.194073	674.692	-2.75492	0.0058707	0.101872
Bccip	0.165475	1744.53	2.7545	0.00587815	0.101872
Rexo4	0.183431	933.686	2.75441	0.00587977	0.101872
Fzd3	-0.179228	66.3045	-2.75198	0.00592358	0.102478
Vwa5a	0.205932	240.319	2.75061	0.00594847	0.102755
Tns1	-0.191953	85.4138	-2.74999	0.00595966	0.102795
Emp1	0.205554	399.83	2.74823	0.00599189	0.103198
C2cd2l	-0.158792	2067.03	-2.74609	0.00603096	0.103712
Stx18	0.187574	1017.84	2.74562	0.00603965	0.103712
Shroom2	-0.19298	835.049	-2.74469	0.00605689	0.103854
R3hdm2	-0.17458	1324.56	-2.74381	0.00607299	0.103976
Eif4g3	-0.174288	2634.26	-2.74236	0.0061	0.104285
Mtss1	-0.204774	390.172	-2.74153	0.00611534	0.104393
Gpr161	-0.204065	339.72	-2.73989	0.00614604	0.104763
Selenbp1	-0.207592	301.292	-2.73531	0.00623211	0.106074
Naxe	0.184458	1807.23	2.73354	0.00626577	0.106358
Gch1	0.095975	18.6302	2.73347	0.00626717	0.106358
Apln	-0.135321	24.4621	-2.72838	0.00636453	0.107853
Eef1a2	0.0347327	3.63268	2.72809	0.00637021	1
Timm23	0.155479	4010.62	2.72762	0.00637937	0.107946
Sesn1	-0.206035	290.824	-2.72595	0.00641163	0.108289
Sorbs1	-0.182658	2501.33	-2.72523	0.00642565	0.108289
Trim62	-0.199793	571.141	-2.72513	0.00642762	0.108289
Fzd5	-0.207212	228.248	-2.72379	0.00645369	0.108391
Slc36a4	-0.201932	548.763	-2.72377	0.00645415	0.108391
Mvd	0.165	1694.08	2.72338	0.00646177	0.108391
Arhgap21	-0.17173	2810.92	-2.71953	0.00653739	0.109501
Supt3	0.204258	235.305	2.71773	0.00657312	0.109941
Tmem206	0.188377	697.798	2.71623	0.00660299	0.110281
Hip1	-0.1658	2626.29	-2.71395	0.00664863	0.110751
Prrc2c	-0.179029	6189.78	-2.71387	0.00665022	0.110751
Efhd2	0.169839	1488.34	2.7117	0.00669383	0.111317
Ccne2	-0.188033	797.402	-2.71014	0.0067255	0.111684
Ppp2ca	0.138977	11095.6	2.70953	0.00673789	0.111729
Deaf1	-0.173562	3190.5	-2.70704	0.00678855	0.112409
Inpp5a	0.172247	1273.42	2.70532	0.00682396	0.112834
Txndc17	0.181989	868.146	2.70479	0.0068347	0.11285
Dmxl1	-0.196602	776.698	-2.70346	0.00686225	0.113144
Tmem44	-0.178863	65.739	-2.70133	0.00690628	0.113615
Mrpl54	0.198225	786.509	2.70113	0.00691042	0.113615
Zfp131	-0.185186	859.505	-2.70008	0.00693229	0.113664
1810037I17Rik	0.184938	1256.11	2.70004	0.00693301	0.113664
Ahnak2	-0.20465	465.46	-2.69743	0.0069877	0.114399
Cobll1	-0.181723	1071.5	-2.6947	0.00704518	0.11507
Lrch1	-0.197084	428.885	-2.69424	0.00705498	0.11507
Tspan17	-0.20489	282.196	-2.69309	0.00707926	0.11507
Mboat7	-0.194244	695.04	-2.69286	0.0070842	0.11507
Ctdsp2	-0.147455	3251.31	-2.69248	0.0070923	0.11507
Edem2	0.166103	1370.1	2.69189	0.0071048	0.11507
Arhgap45	0.0710767	8.60763	2.69138	0.00711573	0.11507
Stard9	-0.204897	272.477	-2.69098	0.00712421	0.11507
Hadhb	0.149299	2962.96	2.69096	0.0071246	0.11507
Slc35e2	-0.203342	279.015	-2.69081	0.00712798	0.11507
Pex5	0.173907	1066.43	2.68941	0.0071579	0.115181
Fam102b	-0.193989	593.851	-2.68922	0.00716187	0.115181
Mlph	-0.144803	8677.78	-2.68909	0.00716464	0.115181
Dck	-0.179384	1044.62	-2.68663	0.00721776	0.115851
Tor3a	0.201928	260.536	2.68623	0.00722635	0.115851
Med11	0.201858	314.556	2.68556	0.00724087	0.115924
Tmem214	0.175396	1665.65	2.68341	0.00728749	0.11639
Tmem33	-0.154811	2750.83	-2.68329	0.00729007	0.11639
Setd5	0.163852	3484.08	2.67877	0.00738926	0.117811
Nod1	0.0931668	15.8188	2.67754	0.00741642	0.11794
Gas2l3	-0.16805	2006.91	-2.67749	0.00741767	0.11794
Slc9a3r2	-0.19327	515.269	-2.67695	0.00742966	0.117969
Phc3	-0.185383	1273.43	-2.67477	0.00747811	0.118576
Tmem255a	0.111872	24.9103	2.67308	0.00751589	0.119012
Plcb4	-0.196075	435.523	-2.67237	0.00753174	0.1191
Ctnnal1	-0.162697	1674.74	-2.67147	0.00755201	0.119258
Fos	0.197045	213.298	2.67082	0.0075667	0.119327
Spta1	-0.0633113	5.18509	-2.67003	0.00758447	0.119445
Itm2a	-0.0936275	10.216	-2.669	0.00760785	0.119651
Cox10	0.169557	1245.95	2.6661	0.00767377	0.120365
Sos2	-0.176745	887.827	-2.66609	0.00767401	0.120365
Ndufs2	0.147538	5444.17	2.66447	0.00771102	0.120782
Exosc4	0.175094	1062.83	2.66386	0.00772506	0.120838
Med21	0.197791	406.108	2.65826	0.00785443	0.122696
Polr2a	-0.160184	7115.45	-2.6566	0.0078934	0.123139
Brwd3	-0.18722	1321.54	-2.65573	0.00791364	0.123289
Rab1	0.142088	5111.03	2.65445	0.0079439	0.123594
Rtn4rl1	-0.11422	20.6923	-2.65247	0.00799055	0.124153
Cdc42bpg	-0.177862	1060.49	-2.65142	0.00801541	0.124373
Klhl23	-0.201125	276.038	-2.64971	0.0080561	0.124686
Aldh2	-0.190296	4163.03	-2.64967	0.00805707	0.124686
Bcan	-0.193319	119.54	-2.64784	0.00810084	0.125132
Cep76	-0.19746	544.16	-2.64756	0.00810749	0.125132
Slc27a1	0.188477	151.259	2.64579	0.00815001	0.125621
Map4k5	-0.16378	1989.3	-2.64521	0.00816394	0.125668
Irs1	-0.200981	279.151	-2.64329	0.00821041	0.126216
Wfdc1	-0.15058	40.0617	-2.63445	0.00842739	0.12938
Sema4d	-0.196044	186.719	-2.62891	0.00856594	0.131333
Terf1	0.190709	461.549	2.62728	0.00860703	0.13163
4932438A13Rik	-0.192103	755.19	-2.62724	0.00860799	0.13163
St6gal1	-0.194772	845.168	-2.62509	0.00866251	0.132139
Tatdn2	0.16969	2538.49	2.62503	0.00866411	0.132139
Gm20422	0.104502	21.6999	2.62393	0.00869212	0.132298
Hist2h2aa1	0.0509436	10.6917	2.62373	0.00869734	0.132298
Irak2	0.197266	232.963	2.62227	0.00873457	0.13269
Tanc2	-0.197732	483.836	-2.61935	0.00880976	0.133657
Kif13a	-0.189838	701.311	-2.61851	0.00883141	0.133703
Cd82	0.193728	442.387	2.61834	0.00883586	0.133703
B230219D22Rik	-0.159609	1635.32	-2.61718	0.00886593	0.133983
Akap11	-0.173925	1382.98	-2.61648	0.00888428	0.134059
Maf1	0.161854	1969.41	2.6161	0.00889406	0.134059
Prpf4b	-0.156921	2299.46	-2.61499	0.00892311	0.134322
Kmt2c	-0.196948	552.982	-2.61386	0.00895268	0.134592
Bach1	0.183818	898.912	2.61311	0.00897236	0.134713
Ino80b	0.187697	1136.91	2.6118	0.00900662	0.135053
Car13	0.17783	858.142	2.61059	0.00903874	0.135359
Aimp1	0.15085	2080.47	2.60816	0.00910311	0.136129
Rnf44	-0.173833	1394.2	-2.60776	0.00911364	0.136129
Ddit4	0.192275	577.641	2.60615	0.00915668	0.136596
Nipal3	-0.193439	529.448	-2.60533	0.00917871	0.136749
Prmt7	0.165857	1876.47	2.60458	0.00919875	0.136871
Thumpd3	0.18033	1040.62	2.60302	0.00924062	0.137318
Acot11	-0.156763	59.0407	-2.60158	0.00927945	0.137718
Sec16a	-0.162397	1670.5	-2.59781	0.009382	0.13893
Gtpbp3	0.185374	554.876	2.5977	0.00938508	0.13893
Tlr1	-0.119163	20.7479	-2.59555	0.0094441	0.139626
Sidt2	-0.186589	993.737	-2.59483	0.00946365	0.139737
Dhcr24	-0.147923	4818.42	-2.59394	0.00948838	0.139923
Kif26a	-0.191595	427.343	-2.59174	0.00954931	0.140643
Htt	-0.182556	2111.73	-2.59115	0.00956552	0.140703
Lurap1l	0.134213	44.4183	2.58864	0.00963549	0.141401
Timp3	-0.196776	301.441	-2.5879	0.00965624	0.141401
Galnt6	0.194538	364.809	2.58789	0.00965665	0.141401
Krtcap2	0.161218	1992.56	2.5877	0.00966178	0.141401
Asxl1	-0.154656	2521.25	-2.58647	0.00969648	0.141441
Utrn	-0.176152	2859.68	-2.58567	0.00971904	0.141441
Mrps7	0.157648	2287.92	2.58498	0.0097384	0.141441
Bcl2l13	0.141755	3263.35	2.5846	0.00974916	0.141441
Baz2a	-0.167245	1727.92	-2.5844	0.0097549	0.141441
Epg5	-0.192839	345.649	-2.58434	0.00975657	0.141441
Nop2	0.139527	6127.6	2.58418	0.009761	0.141441
Phactr1	-0.179566	654.271	-2.58414	0.0097621	0.141441
Traf1	0.0562065	6.80836	2.58098	0.00985215	0.142404
Fam184b	-0.19399	163.128	-2.58064	0.00986165	0.142404
Mrpl22	0.182508	653.571	2.58051	0.00986548	0.142404
Myo5a	-0.157852	10481.5	-2.5794	0.00989725	0.142685
Lrrc8b	-0.176517	994.592	-2.57894	0.00991053	0.142699
Cebpd	0.158311	69.4011	2.5778	0.00994309	0.142991
Sirpa	-0.145415	4918.57	-2.57467	0.0100336	0.144113
Sertad2	-0.170207	1114.52	-2.57316	0.0100775	0.144468
Gtf2f1	0.160055	2605.89	2.57296	0.0100832	0.144468
Wnk4	-0.180823	605.639	-2.57162	0.0101223	0.144658
Mybbp1a	0.131718	12981.4	2.57149	0.0101262	0.144658
Perp	-0.0808056	8.78975	-2.57123	0.0101339	0.144658
Fgd1	-0.182874	531.089	-2.56975	0.0101771	0.144917
Rpp25l	0.177065	796.521	2.56944	0.0101863	0.144917
Cyld	0.181066	755.728	2.56933	0.0101896	0.144917
Cavin2	-0.163815	1244.88	-2.56812	0.0102251	0.145243
Dapk3	0.173082	1048.46	2.56711	0.010255	0.14549
Kifc3	-0.175836	1502.65	-2.56533	0.0103079	0.146062
Man1c1	-0.171758	963.319	-2.56456	0.0103308	0.146208
Ppp1r14c	-0.171263	68.5041	-2.56393	0.0103494	0.146292
Atp6v0c	0.12909	19876.1	2.56336	0.0103664	0.146355
Upf3b	-0.182311	722.947	-2.56246	0.0103933	0.146556
Selenow	-0.189014	651.915	-2.56124	0.0104299	0.146869
Pdgfa	0.190661	289.542	2.56061	0.010449	0.146869
Atp11a	-0.148619	6246.88	-2.56008	0.0104648	0.146869
Tcf7l1	-0.192005	738.893	-2.55973	0.0104755	0.146869
Rpl10a	0.136613	13620.8	2.55961	0.0104789	0.146869
Kctd12	0.181736	694.407	2.55744	0.0105444	0.147609
Fiz1	0.169117	1173.27	2.55631	0.0105788	0.147912
Mxd4	-0.19271	389.614	-2.55387	0.0106532	0.148757
Cgnl1	-0.156334	46.9448	-2.55349	0.0106649	0.148757
Plxnb2	-0.132633	11841.9	-2.55263	0.0106914	0.148901
Rpl13a	0.158191	48037.3	2.55232	0.010701	0.148901
Fkbp10	0.191197	424.786	2.55114	0.0107371	0.149225
Atm	-0.179225	1075.32	-2.55044	0.0107588	0.149347
Syne2	-0.190216	4314.53	-2.5472	0.0108592	0.150339
Arxes1	-0.123301	25.0323	-2.54712	0.0108615	0.150339
Tes	0.149999	2156.51	2.54688	0.0108691	0.150339
Rad18	0.161139	1559.64	2.54593	0.0108986	0.150518
Pgghg	0.191652	251.197	2.54512	0.010924	0.150518
Afap1l1	-0.143875	46.467	-2.54492	0.0109302	0.150518
Zfp236	-0.183424	605.85	-2.5448	0.010934	0.150518
Mapk8ip3	-0.187327	401.885	-2.54358	0.0109721	0.150618
Atxn2	-0.165702	1464.94	-2.54355	0.0109733	0.150618
Evc	-0.170945	1314.84	-2.54293	0.0109926	0.150618
Smarca2	-0.192114	317.615	-2.54291	0.0109932	0.150618
Sod3	-0.179154	112.369	-2.53999	0.0110857	0.151705
Capn6	-0.159643	67.796	-2.53714	0.0111762	0.152763
Ltbr	0.164688	1368.78	2.53483	0.0112501	0.153523
Cryab	-0.157651	3959.74	-2.53458	0.0112583	0.153523
Trrap	-0.173339	3327.52	-2.53407	0.0112747	0.153566
Crip1	-0.124619	24.7255	-2.53208	0.0113388	0.154258
Crls1	0.166811	962.625	2.53095	0.0113755	0.154575
Zkscan17	0.155234	1660.69	2.52892	0.0114415	0.155291
Dnhd1	-0.179057	107.724	-2.52769	0.0114815	0.155652
Gm14391	0.164449	145.801	2.52643	0.0115227	0.156028
2310022B05Rik	-0.151782	1553.49	-2.52502	0.0115691	0.156144
Pdzd2	-0.112506	19.8815	-2.52472	0.0115789	0.156144
Ccdc9	0.169958	929.187	2.52453	0.0115855	0.156144
Pcdhb18	-0.0971539	15.1909	-2.52442	0.011589	0.156144
Gemin7	0.163427	1065.76	2.52412	0.0115987	0.156144
Ankrd44	-0.191536	239.715	-2.51975	0.0117439	0.157606
Gtse1	-0.148637	2153.64	-2.51956	0.0117501	0.157606
Irs2	-0.190318	328.756	-2.5191	0.0117657	0.157606
Foxred2	-0.191591	291.977	-2.51895	0.0117706	0.157606
Nf1	-0.173143	1476.14	-2.51828	0.011793	0.157606
Plvap	0.143999	74.2513	2.51805	0.0118005	0.157606
Dixdc1	-0.185107	397.009	-2.518	0.0118024	0.157606
Kmt2b	-0.163992	1418.37	-2.51759	0.0118161	0.157606
Tfpi	-0.151155	1960.11	-2.5164	0.011856	0.157957
Hnrnpl	0.13812	11423.7	2.51476	0.0119113	0.158347
Fkbp4	0.126203	22355.7	2.51472	0.0119125	0.158347
Cdh13	-0.144469	42.1528	-2.51322	0.0119633	0.15884
Itgb4	-0.17874	92.3824	-2.51137	0.0120262	0.159492
Mrpl14	0.183206	1282.27	2.50879	0.0121147	0.160482
Gria4	-0.177612	92.4529	-2.50834	0.0121299	0.160499
Usp39	0.149173	3074	2.50721	0.0121689	0.160556
Emc3	0.153888	3525.12	2.5071	0.0121727	0.160556
Spg20	-0.149115	2822.74	-2.50701	0.0121757	0.160556
Bptf	-0.150386	3091.54	-2.50492	0.0122481	0.161326
Bfsp2	-0.162573	1119.29	-2.50419	0.0122733	0.161461
Gstp1	-0.144645	13186.6	-2.50382	0.0122862	0.161461
Pla2g2e	0.167005	920.799	2.50307	0.0123122	0.16162
Chid1	0.168227	816.085	2.50251	0.0123315	0.16169
C1ra	0.168617	98.1959	2.49971	0.0124296	0.162709
Srp9	0.147252	2283.2	2.49949	0.0124372	0.162709
Dmpk	-0.189787	285.787	-2.49725	0.012516	0.163555
Hes1	-0.154859	69.7246	-2.49639	0.0125466	0.16377
Socs5	-0.183756	515.827	-2.49551	0.0125775	0.163814
Pex26	0.18363	402.081	2.49549	0.0125782	0.163814
Cpeb4	-0.167403	1347.92	-2.49509	0.0125925	0.163816
Ythdc2	-0.187655	367.129	-2.4939	0.0126348	0.164182
Mtif3	0.187212	335.27	2.4935	0.012649	0.164182
Derl2	0.160507	1338.87	2.49303	0.0126659	0.164218
Cxcl1	0.0306715	2.822	2.49301	0.0126664	1
Cst6	0.180812	640.232	2.49197	0.0127038	0.164463
Isy1	0.156446	1732.27	2.49138	0.0127248	0.164463
Eif5a2	-0.1824	481.072	-2.49131	0.0127274	0.164463
Eva1c	-0.162861	61.622	-2.49065	0.0127511	0.164586
Tpd52	-0.146385	2107.48	-2.48888	0.0128147	0.165223
Prelid2	0.164189	76.2949	2.48652	0.0129001	0.166139
Mfsd14b	-0.164775	1226.48	-2.48334	0.0130157	0.167441
Sdhaf1	0.186038	326.117	2.48207	0.0130623	0.167831
Anxa2	0.145453	3216.91	2.48155	0.0130812	0.167831
Nlrc5	0.0891512	15.6001	2.48133	0.0130894	0.167831
Ap1s2	-0.178203	667.043	-2.4783	0.013201	0.169074
Trappc8	-0.153019	1276.35	-2.47687	0.0132539	0.169565
Mgat2	0.150988	2747.04	2.47634	0.0132735	0.169629
Kcnk13	-0.11877	25.5805	-2.47537	0.0133099	0.169907
Gmppa	0.166676	856.398	2.47489	0.0133276	0.169945
Ddx47	0.146881	2573.1	2.47185	0.0134415	0.171209
Arl14ep	0.181	695.287	2.47114	0.0134683	0.171362
Cryzl1	0.170391	1002.12	2.4683	0.0135757	0.172534
Gm45799	0.178421	300.727	2.46792	0.0135901	0.172534
Ssbp1	0.174671	1146.11	2.46536	0.0136875	0.17358
Mef2d	-0.148661	2163.98	-2.46492	0.0137046	0.173606
Phc1	0.16228	1134.94	2.46298	0.0137789	0.174357
Copg1	0.12323	9344.81	2.46188	0.0138212	0.174512
Cbl	-0.167703	1463.75	-2.46188	0.0138212	0.174512
Exoc3l4	0.165752	108.776	2.46026	0.0138838	0.175111
Rbm4b	-0.186746	204.215	-2.45966	0.013907	0.175213
Plod1	-0.134467	3348.94	-2.45877	0.0139413	0.175455
Etl4	-0.186715	278.083	-2.45824	0.0139618	0.175522
Cbx5	-0.151642	6903.02	-2.45768	0.0139838	0.175584
Mcrip1	0.151594	1525.78	2.45734	0.013997	0.175584
Mrpl35	0.167151	793.003	2.45569	0.0140613	0.1762
Apool	0.176588	129.924	2.45455	0.0141062	0.176571
Hyi	0.144807	64.5483	2.45187	0.0142115	0.177698
Helz	-0.164798	1397.97	-2.45107	0.0142431	0.1779
Ring1	0.179272	551.716	2.45009	0.014282	0.178183
Plekhg1	-0.184782	173.134	-2.44973	0.0142965	0.178183
Dab2	-0.171576	664.337	-2.44876	0.0143351	0.17824
Pradc1	0.17461	647.501	2.44854	0.0143438	0.17824
Ssr2	0.133247	6567.55	2.44845	0.0143472	0.17824
Aplp2	-0.130311	8038.09	-2.44785	0.0143711	0.178347
Sox9	0.180076	170.661	2.44677	0.0144144	0.178692
Net1	0.171465	599.071	2.44478	0.0144942	0.179401
Psma6	0.143055	4231.27	2.44457	0.0145025	0.179401
Slc38a1	-0.132997	9253.94	-2.44302	0.014565	0.179982
Bcs1l	0.183815	266.772	2.44199	0.0146064	0.180085
Mettl3	0.183819	267.026	2.44179	0.0146145	0.180085
Slc25a22	-0.184065	157.723	-2.44166	0.0146199	0.180085
Rc3h1	-0.163928	1049.17	-2.43963	0.0147021	0.180905
Parp1	0.127179	8485.34	2.43524	0.0148819	0.182922
Rbbp6	-0.143645	2510.15	-2.43291	0.0149779	0.183717
Arl8b	0.13624	4244.45	2.43291	0.0149782	0.183717
Lsp1	0.0687679	11.5928	2.43098	0.015058	0.184501
Fam98c	0.169296	120.598	2.43003	0.0150976	0.184704
Nhp2	0.138359	6454.3	2.42982	0.0151065	0.184704
Actb	0.12828	64665.2	2.42761	0.0151987	0.185635
Qser1	-0.166228	1562.18	-2.42657	0.0152423	0.185972
4931406C07Rik	-0.15225	1367.87	-2.4255	0.0152873	0.186325
Dgkd	-0.149389	1584.4	-2.42336	0.0153778	0.187231
Cops7a	0.141507	4142.48	2.42276	0.0154032	0.187308
Spcs3	0.132837	4418.2	2.42245	0.0154164	0.187308
Cep170b	-0.152558	2828.54	-2.42125	0.0154674	0.18773
Enpep	-0.139124	41.9688	-2.41896	0.0155651	0.188676
Birc6	-0.171589	3244.18	-2.41866	0.0155778	0.188676
Arhgap5	-0.156453	2131.92	-2.41704	0.0156472	0.189256
Man2b1	-0.164366	1828.48	-2.41678	0.0156584	0.189256
Hcn1	-0.18338	211.249	-2.41506	0.0157326	0.189955
Smad5	-0.148335	2706.09	-2.41393	0.0157816	0.190348
Neb	-0.173353	99.091	-2.41256	0.0158407	0.190797
Zfp609	-0.139448	2162.56	-2.41227	0.0158537	0.190797
Kif21a	-0.167467	1014.68	-2.41192	0.0158687	0.190797
Rpl27	0.13448	23777.3	2.4112	0.0158999	0.190797
Huwe1	-0.154787	4982.64	-2.41118	0.0159011	0.190797
Adamts20	0.18122	264.381	2.41011	0.0159476	0.191156
Myo1b	0.155931	1644.19	2.40937	0.0159799	0.191347
Akr1b3	0.144648	4469.66	2.40855	0.0160162	0.191454
Prmt3	0.147833	1702.55	2.40841	0.016022	0.191454
Rtl8a	-0.180377	509.715	-2.40766	0.016055	0.191651
Mier2	-0.17472	576.156	-2.40666	0.0160993	0.1918
Art5	0.126092	39.7455	2.40663	0.0161005	0.1918
Pafah1b3	0.167123	117.251	2.40624	0.0161177	0.191807
C1s1	0.0845124	20.3099	2.40525	0.0161613	0.192084
Cpne3	-0.158532	1284.19	-2.40486	0.0161787	0.192084
Creb3l1	-0.129531	36.2245	-2.40459	0.0161907	0.192084
Kmt2e	-0.15105	1386.62	-2.4011	0.0163457	0.193725
Mpdz	-0.158137	1645.72	-2.40065	0.0163659	0.193767
Lrrc59	0.147753	10739.9	2.39889	0.016445	0.194504
Tgm2	0.102198	26.921	2.39432	0.0166514	0.196745
Grik4	0.0623491	9.42456	2.39295	0.0167136	0.197278
Mtfp1	0.168339	699.911	2.39162	0.016774	0.19773
Polr3g	0.175032	425.444	2.39136	0.016786	0.19773
Ncapg2	-0.143421	3278.02	-2.39099	0.016803	0.19773
Tubb2b	-0.121308	31.6697	-2.38951	0.016871	0.19819
Grik2	-0.179543	346.121	-2.3893	0.0168805	0.19819
Fes	-0.0281156	1.48614	-2.38927	0.0168818	1
Gpm6a	-0.1652	1576.07	-2.38902	0.0168935	0.19819
Gxylt1	-0.151024	1579.35	-2.38861	0.0169122	0.198209
Htatsf1	0.154734	1347.91	2.38792	0.0169442	0.198384
Pusl1	0.177857	204.45	2.38692	0.0169902	0.198721
Ticam1	0.170063	568.202	2.38601	0.0170323	0.199014
Mki67	-0.1576	7165.73	-2.38529	0.0170656	0.199202
Sms	0.149389	1340.42	2.38461	0.0170975	0.199373
Lats1	-0.159133	1941.8	-2.38416	0.0171182	0.199414
Ift20	0.173705	570.744	2.37924	0.0173482	0.201891
Mcm2	0.133239	15963.8	2.37834	0.0173908	0.202183
Zbtb46	0.177267	185.308	2.37695	0.0174563	0.202742
Ldlrad3	-0.161848	1379.25	-2.37519	0.01754	0.203509
Wdr34	0.175814	431.811	2.37472	0.0175621	0.203562
Spc24	0.154656	1124.97	2.37309	0.0176398	0.204205
Dscc1	0.174119	412.471	2.37262	0.0176623	0.204205
Plaur	-0.179951	258.194	-2.3722	0.0176825	0.204205
Ccng1	-0.166456	6748.87	-2.37208	0.017688	0.204205
Dab2ip	-0.150001	1467.07	-2.37087	0.0177464	0.204536
Pigx	0.168914	539.219	2.37053	0.0177625	0.204536
Selenop	-0.173206	613.635	-2.37038	0.0177696	0.204536
Cntfr	-0.169245	1656.26	-2.37001	0.0177878	0.204542
Naglu	0.144773	2357.11	2.36915	0.017829	0.204812
Prelp	-0.111455	23.1254	-2.36849	0.0178609	0.204976
Tpra1	0.169799	654.253	2.36778	0.0178951	0.205112
Eif4ebp1	0.156362	2807.84	2.36751	0.0179081	0.205112
Csdc2	-0.117224	26.4549	-2.36594	0.0179843	0.205781
Arid1a	-0.140866	4235.02	-2.36461	0.0180491	0.206319
Lmtk3	-0.102652	19.2122	-2.36405	0.0180763	0.206426
Atp6v0a2	-0.133303	3540.79	-2.36283	0.018136	0.206904
Znrf1	0.173571	920.25	2.36053	0.0182491	0.207933
Phb	0.130809	7967.47	2.36026	0.0182621	0.207933
Robo2	0.0963061	23.7727	2.35968	0.0182909	0.208056
Pros1	-0.174765	406.698	-2.35839	0.0183545	0.208575
Ctxn1	-0.177373	350.758	-2.35707	0.0184199	0.209113
Plekha8	0.154106	1337.65	2.3549	0.0185277	0.210132
Tnpo1	-0.142829	7997.87	-2.35233	0.0186561	0.211381
Osbpl6	-0.174217	356.308	-2.35167	0.0186892	0.211511
Msto1	0.139654	2575.62	2.35138	0.0187041	0.211511
Epha3	-0.139871	2772.68	-2.34956	0.0187958	0.212219
Prag1	-0.168607	657.922	-2.34941	0.0188033	0.212219
Hes6	-0.178429	409.699	-2.34597	0.0189779	0.213388
Plscr2	0.094221	24.1396	2.34577	0.0189876	0.213388
Pyroxd2	0.144641	81.0363	2.34569	0.0189918	0.213388
Bcl9	-0.170064	573.072	-2.3455	0.0190018	0.213388
Cd109	0.172083	1774.29	2.34496	0.0190291	0.213388
Osbp2	0.046858	4.92701	2.3444	0.0190578	0.213388
Atg9a	-0.149131	1313.81	-2.34422	0.019067	0.213388
Uhmk1	-0.15742	2767.97	-2.34415	0.0190705	0.213388
Fam241a	-0.168332	105.91	-2.34376	0.0190903	0.213388
Haspin	0.167332	577.664	2.34336	0.0191107	0.213388
2020-03-08	0.146441	1779.43	2.34331	0.0191136	0.213388
Srrm2	-0.152211	9005.84	-2.34303	0.0191277	0.213388
Txndc11	0.152572	1667.05	2.34248	0.0191563	0.213501
Agrn	-0.137459	1866.73	-2.34046	0.0192598	0.214447
Ubb	0.149967	38008.9	2.33876	0.019348	0.215223
Arhgap1	-0.143004	1755.46	-2.33813	0.0193804	0.215377
Mrpl2	0.142708	1764.51	2.33658	0.019461	0.21587
Zfp212	0.160793	723.046	2.33656	0.019462	0.21587
Lmbrd2	-0.16484	1685.06	-2.33614	0.0194837	0.215904
Gcdh	0.166495	591.084	2.33483	0.0195524	0.216459
Slx4	-0.164868	564.764	-2.33174	0.0197143	0.217926
Nr4a1	-0.169117	884.579	-2.33158	0.0197226	0.217926
Hyou1	0.143834	10550.5	2.32781	0.0199224	0.219925
Tmtc3	-0.158207	1131.67	-2.32689	0.0199713	0.220254
Psmb6	0.148696	4738.59	2.32647	0.0199937	0.220292
Ptpn11	-0.123926	5132.61	-2.32499	0.0200725	0.220887
Smyd5	0.13883	1905.87	2.32474	0.0200858	0.220887
Nos1	-0.0427285	2.99354	-2.32388	0.020132	1
G3bp1	0.12115	14488.5	2.32387	0.0201325	0.22119
Wwc2	-0.139552	2309.8	-2.32182	0.0202424	0.222077
Fam212b	-0.176186	207.419	-2.32127	0.0202722	0.222077
Ctsl	-0.154632	2414.19	-2.321	0.0202868	0.222077
Ahi1	-0.149853	1191.6	-2.32094	0.0202899	0.222077
Trabd	0.147711	1661.58	2.3193	0.0203789	0.222637
Dagla	0.163852	714.737	2.31929	0.0203795	0.222637
Gnaq	-0.144507	1634.15	-2.3177	0.0204657	0.223369
Pdia5	0.169417	486.311	2.31729	0.0204882	0.223404
Hdac11	-0.171459	145.99	-2.3165	0.020531	0.223478
Pcdhb5	-0.0956791	16.7439	-2.31645	0.0205335	0.223478
Prkaa1	-0.139368	2087.25	-2.31564	0.0205777	0.223749
Rpp14	0.159841	750.069	2.3142	0.0206567	0.224253
Dennd5b	-0.161971	1101.89	-2.31409	0.0206628	0.224253
Tln1	-0.139582	12574.4	-2.31159	0.0208001	0.225533
Tigar	0.149645	1304.72	2.3108	0.0208441	0.225601
Rusc2	-0.131909	3092.59	-2.31077	0.0208454	0.225601
Sspn	0.166035	794.18	2.30815	0.0209907	0.226783
Ptges2	0.162818	677.742	2.3081	0.0209937	0.226783
Pigc	-0.174224	260.651	-2.30732	0.0210369	0.226815
Fzd6	-0.160347	702.47	-2.30726	0.0210404	0.226815
Papd5	-0.150431	1570.35	-2.30699	0.0210554	0.226815
Tpm1	0.128075	14699.3	2.30653	0.0210812	0.226882
Klf16	0.160782	951.118	2.30581	0.0211213	0.227103
Golph3	-0.142563	1603.68	-2.3054	0.0211442	0.227138
Tap2	0.0801487	18.9622	2.30168	0.0213535	0.228885
Far1	0.163611	1229.99	2.30142	0.0213679	0.228885
Spp1	0.0876787	21.0483	2.30139	0.0213695	0.228885
Rslcan18	-0.0548575	5.99983	-2.30109	0.0213868	0.228885
Dtna	-0.157594	97.8827	-2.30075	0.0214055	0.228885
Gpt	-0.160432	85.2081	-2.29958	0.0214719	0.229383
Slc35b1	0.146529	1465.03	2.29889	0.021511	0.229589
Sri	0.142862	1593.59	2.29822	0.0215495	0.229751
Armc2	0.163341	127.663	2.2977	0.0215789	0.229751
Hpn	0.0550929	7.11981	2.29758	0.0215856	0.229751
Notch3	-0.127177	37.7489	-2.29702	0.0216177	0.229881
Lims2	0.127799	55.7593	2.29601	0.021675	0.23028
Ccl5	0.0968054	23.3755	2.29523	0.0217201	0.230547
Chrm1	0.0432342	4.8507	2.2942	0.0217788	0.230799
Mybl1	-0.170609	151.32	-2.29378	0.0218031	0.230799
Enpp1	-0.134563	40.3444	-2.29377	0.0218036	0.230799
Dnaic1	-0.165728	1298.49	-2.29287	0.0218557	0.23114
mt-Nd4l	0.148385	992.191	2.28936	0.0220584	0.23307
Arap2	-0.160791	709.716	-2.28844	0.0221121	0.233426
Cep164	-0.14731	1295.89	-2.28801	0.022137	0.233476
Mib1	-0.155478	1987.7	-2.28657	0.0222212	0.233985
Psmd8	0.135321	8025.87	2.28649	0.0222257	0.233985
Gm20458	0.169372	420.855	2.28575	0.022269	0.234228
Marcks	0.12661	4306.96	2.28484	0.0223224	0.234368
Zrsr2	0.159463	635.32	2.28483	0.0223227	0.234368
Hipk2	-0.152491	1977.09	-2.2836	0.0223952	0.234513
Nfkbiz	-0.153463	73.8196	-2.28358	0.0223962	0.234513
Ing3	0.158361	706.903	2.28349	0.0224016	0.234513
Ing1	0.142212	1482.01	2.28322	0.0224174	0.234513
Pgm3	0.171603	293.909	2.28155	0.0225159	0.234892
Tom1l2	-0.139214	2332.12	-2.28132	0.0225293	0.234892
Nfat5	-0.166257	936.136	-2.28132	0.0225298	0.234892
Fgfr1	-0.0831222	12.9865	-2.28098	0.0225498	0.234892
Kansl1	-0.153084	1588.91	-2.28072	0.0225651	0.234892
Mtch2	0.131791	3020.73	2.28055	0.0225752	0.234892
Pla2g4b	0.0873193	18.8413	2.27946	0.0226395	0.23535
Irf2	0.171515	271.742	2.27865	0.0226879	0.235494
Wscd1	-0.0656737	7.03758	-2.2781	0.0227204	0.235494
Slc20a2	-0.139843	2007.95	-2.27809	0.0227211	0.235494
Parl	0.15734	1973.8	2.2777	0.0227447	0.235494
Slc25a11	0.136587	1681.49	2.27752	0.022755	0.235494
Fam210b	-0.161981	548.884	-2.27655	0.0228129	0.235883
Slc31a2	0.14903	74.9905	2.27595	0.0228489	0.236044
Mon1a	0.171102	298.96	2.27224	0.0230723	0.237655
Agfg2	-0.172361	351.795	-2.27215	0.0230773	0.237655
Tmem243	0.170573	235.99	2.27198	0.0230878	0.237655
Tnfrsf12a	0.159983	1136.62	2.27176	0.0231012	0.237655
Narfl	0.166051	453.383	2.27129	0.0231295	0.237655
Cyb5d1	0.169952	308.503	2.27115	0.0231378	0.237655
Mfsd12	0.163386	560.032	2.27098	0.0231484	0.237655
Scoc	-0.155062	1109.45	-2.2698	0.0232199	0.238159
Degs1	0.14121	2050.09	2.26949	0.0232385	0.238159
Brpf3	-0.142709	1328.29	-2.26841	0.023304	0.238619
Gapdh	0.128664	127272	2.26715	0.023381	0.239039
Mycbp2	-0.15662	1406.94	-2.26668	0.0234097	0.239039
Ctnnd1	-0.122388	5171.43	-2.26649	0.0234214	0.239039
Cpped1	0.143909	1788.13	2.26631	0.0234322	0.239039
Nbea	-0.157099	1050.01	-2.26605	0.0234486	0.239039
Bmp2k	0.169692	541.062	2.26572	0.0234687	0.239039
Trib2	-0.145031	65.5553	-2.26423	0.0235598	0.23955
Uchl3	0.155106	797.063	2.26423	0.0235602	0.23955
Nin	-0.147899	1871.2	-2.263	0.0236358	0.240107
Sema3d	-0.0932993	16.5276	-2.26213	0.0236892	0.240382
Gnas	-0.130349	19551.4	-2.26189	0.0237043	0.240382
Dnaaf3	-0.0259531	1.37032	-2.26155	0.0237253	1
Pard3b	-0.0259531	1.37032	-2.26155	0.0237253	1
Abcb9	-0.139043	48.9149	-2.26015	0.0238122	0.241265
Abcc4	-0.150933	1270.45	-2.25927	0.0238668	0.241405
Tm4sf1	-0.132125	3064.32	-2.25917	0.0238729	0.241405
Phyhd1	0.0972456	24.5998	2.25889	0.02389	0.241405
Retreg3	-0.153725	1641.79	-2.25842	0.0239194	0.241405
Gm28042	-0.105046	24.8016	-2.25825	0.0239302	0.241405
Vcam1	0.0236414	2.48361	2.25809	0.0239398	1
Lyst	-0.166306	873.179	-2.25756	0.0239731	0.241628
Tmem132a	-0.137642	1637.19	-2.25683	0.0240185	0.241737
Mrps35	0.151688	1068.27	2.25672	0.0240256	0.241737
Las1l	0.147237	1097	2.25618	0.0240591	0.241864
Chd3	-0.148123	2115.99	-2.25506	0.0241297	0.242363
Rnf213	0.163599	737.803	2.25393	0.0242008	0.242757
Col4a3bp	-0.146711	1118.78	-2.25348	0.0242287	0.242757
Rilpl2	0.169655	251.688	2.25344	0.0242317	0.242757
Espnl	0.129826	84.4176	2.25204	0.02432	0.243431
Slc4a8	0.151985	850.957	2.25097	0.0243875	0.243896
mt-Atp6	-0.169883	19023.9	-2.25007	0.0244444	0.244254
Pyurf	0.166366	461.929	2.24932	0.024492	0.244375
Pitpnc1	-0.167643	386.431	-2.24905	0.0245093	0.244375
Gmcl1	0.146078	1188.63	2.24889	0.0245197	0.244375
Acer2	-0.170413	316.304	-2.24813	0.0245682	0.244648
Jarid2	-0.161224	650.169	-2.24775	0.0245923	0.244678
Acaca	-0.136506	4687.15	-2.24732	0.0246193	0.244736
Malsu1	0.163569	553.056	2.24642	0.0246773	0.245103
Mapk11	0.168707	335.477	2.24436	0.0248092	0.24602
Cyp4v3	0.125222	43.5272	2.24431	0.0248122	0.24602
Wnk2	-0.0864272	14.488	-2.24376	0.0248476	0.246161
Rab7	0.11047	11468.5	2.24261	0.0249219	0.246336
Cope	0.154667	3412	2.24228	0.0249435	0.246336
Sipa1l2	-0.160225	1151.8	-2.24202	0.0249598	0.246336
Esd	0.132571	2694.88	2.24153	0.0249919	0.246336
Ift57	0.167269	379.184	2.24138	0.0250017	0.246336
Mbd4	0.167845	300.869	2.24126	0.0250091	0.246336
Preb	0.130781	2385.36	2.24119	0.025014	0.246336
Hook1	-0.167366	148.103	-2.2391	0.0251497	0.247147
Zfp784	-0.0713195	11.6708	-2.23909	0.0251501	0.247147
Fam96b	0.164732	1063.87	2.23873	0.0251732	0.247147
Cfap46	0.0450557	5.4309	2.23859	0.0251829	0.247147
Pno1	0.146999	1645.58	2.23807	0.0252166	0.247147
Zc3h11a	-0.139388	2066.02	-2.23776	0.0252366	0.247147
Nagpa	0.1511	837.782	2.23762	0.0252457	0.247147
Tpcn1	-0.135562	1507.42	-2.23542	0.0253901	0.248351
Mrpl10	0.151201	1237.85	2.23483	0.0254286	0.248519
Gpr108	0.157048	641.03	2.2336	0.0255095	0.248915
Ankrd17	-0.133278	3441.25	-2.23356	0.0255121	0.248915
Spred1	-0.142659	1976.33	-2.23169	0.0256353	0.249907
Pnkp	0.156418	618.585	2.23115	0.0256715	0.250049
Itfg2	0.152414	1181.54	2.23039	0.0257215	0.25011
Slc5a3	-0.169771	365.74	-2.23012	0.0257397	0.25011
Nck2	-0.158656	513.701	-2.23004	0.0257449	0.25011
Lig1	0.126934	4683.58	2.22975	0.0257641	0.25011
Exosc3	0.144394	1017.83	2.22905	0.0258104	0.25035
9130401M01Rik	0.14931	903.722	2.22839	0.0258542	0.250362
Ptrh1	0.167397	239.824	2.22807	0.0258756	0.250362
Aldoa	0.116024	38796.1	2.22806	0.0258764	0.250362
Paqr4	-0.169162	280.616	-2.22695	0.0259505	0.250722
Klhl29	-0.168995	242.446	-2.22686	0.0259569	0.250722
Tle3	-0.142872	1338.22	-2.22648	0.0259823	0.250758
Bcl2l11	-0.158691	97.0938	-2.22425	0.0261317	0.25199
Srgap3	-0.0930679	16.5218	-2.22292	0.026221	0.252529
Tubgcp6	-0.157103	1042.35	-2.22277	0.0262311	0.252529
Cdk10	0.165231	407.321	2.2219	0.0262899	0.252624
Prmt1	0.115057	8471.01	2.22177	0.0262988	0.252624
Ranbp2	-0.148606	2622.5	-2.22166	0.0263063	0.252624
Ncf2	-0.131551	47.2076	-2.22045	0.0263884	0.253202
Scd2	-0.113912	58722.4	-2.21991	0.0264251	0.253344
Soga1	-0.164891	713.328	-2.21898	0.0264881	0.253738
Phyhipl	-0.0781594	12.6426	-2.21776	0.026571	0.254074
Prickle1	-0.129357	3445.71	-2.21707	0.026618	0.254074
Ccdc90b	0.166218	384.199	2.21692	0.0266285	0.254074
Arid4a	-0.156747	621.181	-2.21682	0.0266356	0.254074
Lmtk2	-0.142847	1984.62	-2.21679	0.0266371	0.254074
Lrrn3	-0.0841167	15.074	-2.21654	0.0266546	0.254074
Slc26a11	-0.162166	122.889	-2.21533	0.0267373	0.254652
Zbtb41	-0.155032	1336.81	-2.21369	0.0268498	0.255389
Ano3	-0.16421	500.882	-2.21357	0.0268587	0.255389
Akap9	-0.15446	1362.49	-2.21275	0.0269151	0.255715
Ppt2	-0.134562	3535.1	-2.2115	0.0270016	0.256294
Tmem204	-0.103582	21.3932	-2.21123	0.0270202	0.256294
Hspb1	-0.104471	23.1764	-2.21075	0.027053	0.256395
Bend7	-0.0297637	1.70388	-2.20969	0.0271267	1
Aff3	-0.152185	750.27	-2.20916	0.0271638	0.257177
Ddx49	0.135078	2094.37	2.20839	0.0272171	0.257177
Nisch	-0.125291	4925	-2.20831	0.0272227	0.257177
Vldlr	0.0825513	16.5839	2.20829	0.0272242	0.257177
Prnd	0.0405484	4.5166	2.2075	0.0272789	0.257483
Aldh1b1	0.109995	37.432	2.20671	0.0273346	0.2578
Psma1	0.134721	3859.3	2.20528	0.0274347	0.258533
Fam76b	-0.160989	449.818	-2.20459	0.0274828	0.258776
Suz12	-0.117695	4488.32	-2.20398	0.027526	0.258916
Iqsec1	-0.145093	1827.67	-2.20374	0.0275423	0.258916
Taf1	-0.12986	1946.57	-2.20287	0.0276038	0.259283
Bscl2	-0.16711	213.725	-2.20232	0.0276428	0.25944
Sugt1	0.137792	1414.38	2.2016	0.0276933	0.259603
Mast3	-0.147843	1222.98	-2.20126	0.0277178	0.259603
Ppp2r3a	-0.166919	203.642	-2.20112	0.0277274	0.259603
Mrpl16	0.156597	653.192	2.20076	0.0277528	0.259631
Hist1h2be	-0.0866586	15.204	-2.19972	0.0278265	0.26011
Fbxo7	-0.143415	1237.2	-2.19898	0.0278797	0.26039
Hgsnat	-0.120237	5322.54	-2.19841	0.0279196	0.26039
Tmem50b	-0.161864	478.799	-2.19835	0.0279238	0.26039
Tspan14	-0.147258	1024.84	-2.1979	0.0279564	0.260484
Poldip3	0.121471	4312.01	2.19737	0.0279938	0.260621
Efna5	-0.161025	484.952	-2.19705	0.0280166	0.260621
Mapk8ip1	0.12523	6046.78	2.19673	0.02804	0.260621
Slc16a2	-0.0651039	7.1023	-2.19643	0.028061	0.260621
Palm2	-0.150664	89.34	-2.19391	0.0282416	0.262089
Ngdn	0.15405	730.195	2.1931	0.0282999	0.262419
2310057J18Rik	-0.0867786	13.745	-2.19202	0.0283782	0.262879
Mipep	0.158159	588.814	2.19179	0.0283948	0.262879
Slc6a15	-0.157477	491.575	-2.18941	0.0285673	0.264264
Ankrd53	0.0234793	2.23913	2.18928	0.0285765	1
E2f8	-0.145152	1019.59	-2.1886	0.028626	0.264396
Slc45a4	-0.149995	738.825	-2.18858	0.0286271	0.264396
Frs2	-0.151019	852.477	-2.18779	0.0286846	0.264716
Atg16l2	0.156166	141.728	2.18727	0.0287226	0.264856
Mrps24	0.140532	1613.33	2.1867	0.0287648	0.265034
Ssc5d	-0.143565	60.4764	-2.186	0.0288157	0.265181
Intu	-0.15328	812.619	-2.18544	0.0288569	0.265181
Mios	0.149306	1086.97	2.18531	0.0288664	0.265181
Acap1	-0.0562542	5.06651	-2.18523	0.0288723	0.265181
Mettl16	0.135223	1588.99	2.18464	0.0289155	0.265368
Tspyl4	-0.157234	150.966	-2.18373	0.0289822	0.265375
Ercc1	0.161961	348.487	2.18372	0.0289829	0.265375
Bcor	-0.138376	1369.22	-2.18369	0.0289849	0.265375
Npm1	0.1154	31051.2	2.18319	0.0290218	0.265503
Glo1	-0.127654	2806.95	-2.18254	0.0290697	0.265731
Eea1	-0.151864	880.757	-2.18154	0.0291432	0.266193
Drg1	0.132	3402.28	2.18089	0.0291914	0.266423
Sapcd2	0.145143	1147.72	2.18031	0.0292348	0.266609
Lgals3bp	0.144191	1437.75	2.1794	0.0293021	0.26672
Tet3	-0.137211	1993.88	-2.1792	0.0293165	0.26672
Mdfic	0.15506	1235.2	2.17906	0.0293272	0.26672
Fam104a	0.141132	2340.18	2.1789	0.0293389	0.26672
Itgb1	-0.108478	11826.2	-2.17641	0.0295247	0.268198
Gpr162	0.10224	39.0242	2.17579	0.0295712	0.26841
Chd6	-0.148631	1051	-2.17474	0.0296495	0.26891
Atg4a	-0.154925	623.799	-2.17236	0.0298288	0.270139
Lpin1	0.159846	418.46	2.17212	0.0298467	0.270139
Slc25a23	-0.156491	557.332	-2.17201	0.0298549	0.270139
Mgme1	-0.160133	421.5	-2.17154	0.0298906	0.270173
Lactb2	-0.148342	801.204	-2.17119	0.0299165	0.270173
Ift80	-0.151578	618.523	-2.17103	0.0299286	0.270173
Tbcc	0.156123	504.305	2.17002	0.0300053	0.270474
Tmem131	-0.136914	3787.03	-2.16998	0.0300086	0.270474
Ankrd2	0.151035	99.2482	2.16961	0.0300368	0.270518
Speg	0.134348	1952.13	2.16817	0.030146	0.271291
Mri1	0.144851	1074.79	2.16781	0.0301731	0.271324
Tmem229b	0.145379	90.5483	2.16733	0.0302101	0.271446
Clhc1	0.0235216	2.17608	2.16686	0.0302457	1
Ncoa6	-0.140247	1321.9	-2.1657	0.0303338	0.272346
Dpp8	-0.138355	2035.88	-2.16513	0.0303778	0.272505
Coch	-0.0697774	10.076	-2.16474	0.0304074	0.272505
Clip1	-0.139896	1720.9	-2.16455	0.030422	0.272505
Echdc1	0.135873	1756.73	2.16342	0.0305086	0.27307
Pank3	-0.137817	2079.24	-2.16244	0.0305847	0.273539
Cep89	0.146418	820.379	2.1621	0.0306103	0.273558
Gsdmd	0.0966041	27.2437	2.16009	0.0307658	0.274735
Gse1	-0.160447	544.456	-2.15959	0.0308047	0.274797
Art3	-0.118418	39.2387	-2.15939	0.0308201	0.274797
Mob1a	0.122512	4343.23	2.1588	0.0308654	0.274855
Unc5c	-0.147738	3714.58	-2.15869	0.0308741	0.274855
Gdpd5	0.136125	93.8821	2.15569	0.0311081	0.276726
Nwd1	0.150064	112.977	2.15404	0.031237	0.277619
Slc35a1	-0.150605	615.371	-2.15379	0.0312564	0.277619
Adgre5	-0.161767	197.09	-2.15271	0.0313416	0.278162
Dock7	-0.123962	2993.35	-2.15153	0.0314343	0.278299
Ppib	0.122819	4221.32	2.15116	0.0314636	0.278299
Dcp1b	0.158945	181.678	2.1511	0.0314687	0.278299
Golt1b	0.141195	1498.05	2.15102	0.0314746	0.278299
Hspe1	0.144561	9478.34	2.15091	0.0314833	0.278299
Hoxb9	0.152124	126.971	2.15069	0.031501	0.278299
Lin37	0.161309	204.487	2.15009	0.0315485	0.278363
Ttc30a1	0.139717	78.5249	2.14999	0.0315563	0.278363
Rnf167	-0.161951	292.185	-2.14934	0.0316072	0.278391
Hectd1	-0.125427	4920.23	-2.14934	0.0316075	0.278391
Mdm2	-0.136396	2330.52	-2.14892	0.0316409	0.278473
Nat9	0.156916	147.628	2.14831	0.0316889	0.278685
Telo2	-0.125098	2038.85	-2.14671	0.0318165	0.279594
Zmat5	0.160803	342.629	2.14598	0.0318749	0.279895
Slc35b4	0.134721	2148.54	2.14374	0.0320537	0.281252
Mtus1	-0.0540549	5.1431	-2.14269	0.0321376	0.28169
Pdgfrb	-0.162027	317.957	-2.14251	0.0321521	0.28169
4930503L19Rik	-0.159502	365.287	-2.1413	0.0322495	0.282329
Pold1	0.115948	3824.06	2.14052	0.0323125	0.282668
Znrf3	-0.160793	482.263	-2.13812	0.032507	0.284113
Hist1h2bc	-0.158143	147.927	-2.13788	0.0325268	0.284113
Lysmd3	-0.161245	296.447	-2.13654	0.0326353	0.284473
Ap4b1	0.157453	445.685	2.13646	0.0326419	0.284473
Ablim1	-0.157861	458.573	-2.1362	0.0326629	0.284473
Hk2	0.134497	2496.62	2.13613	0.0326691	0.284473
Mex3a	-0.130109	1624.54	-2.13586	0.0326907	0.284473
Rgs12	-0.145486	780.301	-2.13515	0.0327484	0.284761
Mrm3	0.153464	535.612	2.1342	0.0328263	0.285224
Klhdc8a	-0.0493197	4.36757	-2.13256	0.0329612	0.28584
Bud23	0.136176	1422.86	2.13247	0.0329685	0.28584
Atrn	-0.13659	1590.03	-2.13238	0.0329752	0.28584
Ppp1r11	0.134787	1243.53	2.13214	0.0329957	0.28584
A430005L14Rik	0.152243	535.768	2.13111	0.03308	0.286356
Topbp1	-0.118059	4476.72	-2.13024	0.0331517	0.286762
Hps5	-0.136418	1608.82	-2.12948	0.0332145	0.28706
Cluh	0.129216	4168.74	2.12915	0.0332416	0.28706
Cpd	-0.131533	1769.49	-2.12893	0.0332604	0.28706
Pkdcc	-0.157872	377.374	-2.12638	0.033472	0.288641
Fkbp11	0.1515	594.546	2.12595	0.0335073	0.288641
Prdm11	0.15344	563.347	2.1255	0.0335451	0.288641
Tbl1xr1	-0.150831	642.335	-2.12506	0.0335814	0.288641
Fign	-0.159896	170.631	-2.12502	0.0335853	0.288641
Mgat4a	-0.141118	1475.33	-2.12477	0.0336061	0.288641
Uap1l1	0.129807	7190.71	2.12462	0.0336179	0.288641
Tank	0.147264	784.917	2.12349	0.0337125	0.289239
Glis3	-0.159844	190.345	-2.12252	0.0337942	0.289488
Rgma	-0.157848	409.152	-2.12247	0.0337985	0.289488
Prkx	-0.139348	1021.53	-2.12225	0.0338164	0.289488
Brd1	-0.129085	1795.32	-2.12168	0.0338645	0.289685
Atn1	0.121758	5297.05	2.12043	0.0339701	0.290374
Clstn3	0.142322	1147.3	2.11946	0.0340515	0.290856
Zcchc24	-0.151643	117.993	-2.11873	0.0341129	0.291165
B4galt4	-0.151603	105.671	-2.11835	0.0341458	0.291232
Asl	0.138387	1266.94	2.1179	0.0341836	0.29134
Prdm16	-0.115677	3601.41	-2.11729	0.0342355	0.291568
Chchd4	0.120896	2775.75	2.11475	0.0344509	0.292426
Qpctl	0.158863	204.865	2.11468	0.0344571	0.292426
Gm973	-0.148728	92.8684	-2.11458	0.0344657	0.292426
Plxnb1	0.12828	3074.69	2.11428	0.0344915	0.292426
Dennd2c	-0.159769	218.891	-2.11425	0.0344941	0.292426
Nab2	-0.158739	334.954	-2.1141	0.0345067	0.292426
Ankrd11	-0.116598	5516.35	-2.11394	0.0345202	0.292426
Nes	-0.140171	2854.12	-2.11373	0.0345381	0.292426
Mmd	-0.150049	561.453	-2.11316	0.034587	0.292626
Pfn2	-0.143125	771.955	-2.11278	0.0346198	0.29269
Polr3e	0.133358	1270.53	2.10975	0.0348801	0.294676
Pja2	-0.130689	1542.53	-2.10908	0.0349374	0.294945
Dohh	0.129357	1669.54	2.10863	0.0349766	0.295061
Rif1	-0.132381	2158.8	-2.10795	0.0350356	0.295343
Txndc12	-0.135005	1077.49	-2.10712	0.0351072	0.295639
Insr	-0.152836	537.631	-2.10695	0.0351217	0.295639
Gatb	0.156679	466.205	2.10477	0.0353117	0.296829
Smyd3	0.158577	257.604	2.10474	0.0353142	0.296829
Ltv1	0.132783	1266.61	2.10415	0.0353654	0.29689
Ephx1	-0.122806	3296.39	-2.10397	0.0353809	0.29689
Gm6710	-0.146058	147.758	-2.10374	0.0354009	0.29689
Tufm	0.124663	2520.26	2.10337	0.0354338	0.29689
Flnb	-0.15107	1090.54	-2.10319	0.0354495	0.29689
Hcfc1	-0.121564	6724.59	-2.10193	0.0355592	0.297423
Ovca2	0.158105	316.058	2.10168	0.0355814	0.297423
Cnbp	0.110682	21760.2	2.10141	0.0356054	0.297423
Emc4	0.1377	2050.94	2.10091	0.0356489	0.297423
Mitd1	0.157827	328.261	2.10087	0.0356523	0.297423
Peg10	-0.137338	4682.67	-2.1007	0.0356671	0.297423
Foxp2	-0.158355	167.06	-2.09938	0.0357836	0.29818
Arhgef11	-0.137168	1832.68	-2.09867	0.0358462	0.298486
Csad	-0.150092	626.47	-2.09808	0.0358984	0.298707
Crebbp	-0.149378	681.521	-2.09777	0.035925	0.298714
Mars	0.124326	3270.3	2.09743	0.0359559	0.298756
Gng7	-0.137661	884.195	-2.09704	0.0359902	0.298766
Ranbp1	0.116658	7345.45	2.09683	0.0360086	0.298766
Med31	0.151354	156.664	2.09444	0.0362207	0.300158
Tmem246	-0.145334	89.9416	-2.09436	0.0362281	0.300158
Gnptab	-0.125054	2109.94	-2.09361	0.0362943	0.300491
Nme6	0.151304	530.003	2.09209	0.0364308	0.301386
Git1	-0.114965	3710.86	-2.09145	0.0364875	0.301386
Stim2	-0.151808	677.383	-2.09122	0.0365082	0.301386
Pkib	-0.140057	68.4559	-2.0911	0.036519	0.301386
Fam117b	-0.142513	722.692	-2.09095	0.0365324	0.301386
Igf2bp2	0.152804	172.208	2.09006	0.0366127	0.301443
Dpy19l4	-0.143419	870.958	-2.09001	0.0366168	0.301443
Mbd6	-0.141731	1027.29	-2.08982	0.0366341	0.301443
Glg1	-0.132623	2925.59	-2.08972	0.0366433	0.301443
Got1	0.113881	4444.78	2.08931	0.0366794	0.301526
Peli3	-0.0891564	17.5748	-2.08786	0.0368103	0.302278
Slc6a9	0.15641	298.447	2.08735	0.0368567	0.302278
Lyrm9	-0.15819	327.344	-2.08715	0.036875	0.302278
Mpp6	0.120114	3370.67	2.08714	0.0368753	0.302278
Egr1	0.156488	252.651	2.08652	0.0369319	0.302528
Klhl21	-0.131312	1870.15	-2.08582	0.0369953	0.302641
Mrrf	0.148806	560.316	2.08579	0.0369978	0.302641
Tnfrsf10b	-0.157721	292.474	-2.08194	0.0373476	0.305286
Atp1a3	0.0677192	13.6879	2.08071	0.0374605	0.305965
Mrpl48	0.149347	1095.85	2.08033	0.0374949	0.305965
Pus10	0.141594	915.618	2.07921	0.0375977	0.305965
Lmo2	-0.0379049	2.97002	-2.07908	0.03761	1
Mid1ip1	0.130852	1756.59	2.07887	0.037629	0.305965
Ints13	0.128981	1466.49	2.07876	0.0376398	0.305965
Pacs1	-0.138151	1039.18	-2.07845	0.0376679	0.305965
Fbxo4	0.155068	166.77	2.07827	0.0376848	0.305965
Reck	-0.157592	246.562	-2.07795	0.0377136	0.305965
Tmem254c	0.152352	161.274	2.07735	0.0377692	0.305965
Mbnl3	-0.157429	223.169	-2.07716	0.0377866	0.305965
Gm3055	0.130544	77.1136	2.07674	0.0378257	0.305965
Ddc	-0.0342336	2.70292	-2.07637	0.0378597	1
4930402H24Rik	-0.156413	304.103	-2.0763	0.0378664	0.305965
Cftr	0.113134	42.6259	2.07626	0.0378697	0.305965
Dact1	0.152459	191.065	2.07618	0.0378776	0.305965
Ski	-0.117849	3870.64	-2.07612	0.0378831	0.305965
Sipa1	0.139996	807.944	2.07612	0.0378832	0.305965
Rab11fip5	0.0954777	28.3541	2.07598	0.0378962	0.305965
Mro	0.114625	46.4058	2.07587	0.0379057	0.305965
Bin3	0.131105	1212.2	2.07546	0.0379437	0.306058
Ldhb	0.127962	2030.7	2.07387	0.0380911	0.306284
Tsku	0.156309	246.683	2.07375	0.0381029	0.306284
Syngr1	0.131297	5226.67	2.07374	0.0381032	0.306284
Wnt2b	-0.0454205	4.08458	-2.07369	0.0381081	0.306284
Ube4b	-0.121018	2526.61	-2.07366	0.0381113	0.306284
Isca1	-0.129311	1340.5	-2.07328	0.0381467	0.306284
Rbm12b2	-0.15557	186.893	-2.07317	0.0381567	0.306284
Ell2	0.146445	109.962	2.07283	0.0381884	0.306327
Psma7	0.122348	4370.27	2.07231	0.0382369	0.306503
Rictor	-0.143816	1311.24	-2.07177	0.0382872	0.306695
Nop53	0.124701	2794.8	2.07122	0.0383379	0.306784
Set	0.118071	21790.7	2.07108	0.0383513	0.306784
Mettl1	0.145909	558.024	2.07078	0.0383797	0.3068
Zfp986	-0.0262889	1.60254	-2.07069	0.0383879	1
Eng	-0.109872	6151.99	-2.07032	0.0384224	0.306929
Flna	-0.115578	18863.4	-2.06803	0.0386376	0.308436
Napg	-0.153654	494.083	-2.06745	0.0386915	0.308653
Ago3	-0.156476	254.281	-2.06693	0.038741	0.308783
Mrps10	0.137292	1313.18	2.06672	0.038761	0.308783
Smg1	-0.145759	1860.31	-2.06396	0.0390213	0.310306
Amot	-0.155994	195.338	-2.06384	0.0390326	0.310306
Adk	-0.140516	827.847	-2.06351	0.0390645	0.310306
Faxc	-0.152659	622.766	-2.0633	0.0390841	0.310306
Stx12	-0.135321	1236.77	-2.06291	0.0391212	0.310306
Creb5	0.086719	34.6888	2.06282	0.0391299	0.310306
Mrpl13	0.129718	3377.52	2.06272	0.0391396	0.310306
Ndufb10	0.142316	3128.55	2.06118	0.0392858	0.311171
Strap	0.123943	10649.7	2.06089	0.0393134	0.311171
Rnf181	0.134387	1601.96	2.06067	0.0393343	0.311171
Lrp11	0.155218	265.962	2.06044	0.0393561	0.311171
Rab28	0.146302	841.332	2.06004	0.039395	0.311266
Nacc2	-0.127212	2453.43	-2.05889	0.0395049	0.311922
Ppa1	0.1179	2922.33	2.05801	0.039589	0.312373
Sptbn4	-0.0360072	2.44293	-2.05757	0.0396319	1
Ampd2	-0.127229	1856.44	-2.05612	0.0397706	0.313212
Pnma1	-0.074441	13.851	-2.05537	0.0398433	0.313212
Ttf2	-0.133495	1718.77	-2.05508	0.0398715	0.313212
Serpinh1	0.10917	20798.6	2.05499	0.0398802	0.313212
Aatk	-0.144648	113.316	-2.05469	0.0399093	0.313212
Hmgcr	-0.111819	4708.9	-2.05436	0.039941	0.313212
Rab30	0.150028	213.456	2.05401	0.0399751	0.313212
Sec61g	0.152253	1464.36	2.05374	0.040001	0.313212
Fsd1	0.0928299	30.3067	2.05363	0.0400116	0.313212
Prkce	-0.149402	603.455	-2.05355	0.0400194	0.313212
Sypl	-0.132682	1706.99	-2.05354	0.0400207	0.313212
Bcl10	0.149897	588.111	2.05347	0.0400269	0.313212
Atp8a1	-0.15592	237.643	-2.05307	0.0400653	0.313212
Pstpip1	0.0896526	24.157	2.05299	0.0400736	0.313212
Ice1	-0.133705	1202.02	-2.05212	0.0401579	0.313416
Wasf1	-0.146574	813.437	-2.05161	0.0402078	0.313416
Selenos	0.138274	1711.05	2.05157	0.0402112	0.313416
Glod4	0.135142	1725.35	2.05152	0.0402161	0.313416
Chmp6	0.12935	2571.24	2.05133	0.0402349	0.313416
Hps3	-0.139028	876.789	-2.05094	0.0402733	0.313436
Scamp2	-0.135089	1189.33	-2.05075	0.0402916	0.313436
Abl1	-0.10884	4541.67	-2.04951	0.040412	0.314162
G0s2	-0.0795582	14.561	-2.04763	0.0405963	0.315202
Nppb	0.150993	354.221	2.0471	0.0406479	0.315202
Aars	0.102997	11764.4	2.04706	0.040652	0.315202
Tmem64	-0.141671	904.457	-2.04704	0.0406546	0.315202
Slc39a4	0.0412944	5.81085	2.04629	0.0407276	0.315401
Ubl4a	0.127871	1351.19	2.04617	0.0407397	0.315401
Trappc3	0.14638	1580.56	2.04594	0.0407618	0.315401
Setd6	0.151989	533.851	2.04539	0.040816	0.315482
Cog2	0.135389	989.851	2.04529	0.0408267	0.315482
Ubtd2	0.15104	153.768	2.04402	0.0409514	0.316234
Fmn1	-0.129662	2476.52	-2.04358	0.0409954	0.316364
Adgrl2	-0.115514	4933.74	-2.04196	0.0411557	0.317262
Scrg1	-0.0716519	11.1931	-2.04143	0.0412085	0.317262
Plat	0.123348	61.9636	2.0414	0.0412109	0.317262
Tnpo2	-0.119744	2785.54	-2.04113	0.0412379	0.317262
Foxp4	0.127211	1526.83	2.04102	0.0412487	0.317262
Haus1	0.150485	524.346	2.03996	0.0413541	0.317824
Zic1	0.059321	11.4478	2.03974	0.0413766	0.317824
Fez2	0.148912	549.759	2.0382	0.0415299	0.31879
Ttc14	-0.147027	598.926	-2.03735	0.0416153	0.319134
Calr	0.113273	35299.3	2.0372	0.0416298	0.319134
C1ql1	-0.0876128	19.9953	-2.036	0.0417502	0.319757
Zfp367	-0.142843	693.464	-2.03565	0.0417855	0.319757
Spsb2	0.152859	326.7	2.03557	0.0417938	0.319757
Sall2	-0.148818	556.167	-2.03516	0.0418349	0.31986
Osbpl1a	-0.142682	898.232	-2.03447	0.0419041	0.320178
Zfp787	0.143517	570.956	2.03306	0.0420461	0.321051
Vti1b	0.124867	2470.38	2.03234	0.0421193	0.321198
Atp13a2	-0.127641	8986.38	-2.03233	0.0421206	0.321198
Txnip	0.153015	251.936	2.03194	0.0421593	0.321281
Gm28778	0.0122508	21.111	2.03084	0.042271	0.321921
Gstk1	0.148056	132.048	2.02949	0.0424083	0.321999
Nhlrc3	-0.153679	301.273	-2.02947	0.0424104	0.321999
Sgpp2	-0.0484087	4.52171	-2.02916	0.0424425	0.321999
Zdhhc21	-0.149025	727.995	-2.02884	0.0424744	0.321999
Tmod2	-0.0943821	22.7568	-2.02841	0.0425181	0.321999
Ccdc47	-0.116627	3825.99	-2.02819	0.0425409	0.321999
H2afv	-0.142708	670.612	-2.02817	0.0425425	0.321999
Chmp2a	0.131231	1691.27	2.02792	0.0425679	0.321999
M6pr	0.106713	5864.51	2.02791	0.0425689	0.321999
Mmgt1	-0.129607	2481.05	-2.02791	0.0425697	0.321999
Tmcc2	-0.122628	2142.79	-2.0276	0.0426012	0.321999
Nt5c	0.131805	938.522	2.02747	0.0426146	0.321999
Aldoc	-0.153452	260.735	-2.02698	0.0426641	0.322112
Pde1c	-0.148412	120.996	-2.02633	0.0427306	0.322112
Zfp975	0.124853	63.1164	2.02618	0.0427461	0.322112
Mcm5	0.105279	9117.94	2.02601	0.0427643	0.322112
Cdc42bpb	-0.116134	6771.56	-2.02587	0.0427781	0.322112
Meis3	0.148449	148.012	2.02569	0.0427963	0.322112
Zfp326	-0.135391	947.497	-2.02475	0.0428929	0.322629
Papln	-0.148328	222.307	-2.02404	0.0429658	0.322836
Plcb2	-0.0464401	4.53872	-2.02383	0.0429881	0.322836
Apaf1	-0.135769	1554.03	-2.02367	0.043004	0.322836
Uqcrc2	0.107234	3879.59	2.02277	0.0430973	0.323033
Sh3rf1	-0.146358	462.644	-2.02267	0.0431072	0.323033
Trim16	-0.0876928	20.4025	-2.02261	0.0431139	0.323033
Rbm19	0.125233	2312.42	2.02185	0.0431915	0.323406
Cerk	-0.122155	2037.25	-2.02141	0.0432369	0.323511
Mrpl1	0.146029	492.693	2.02118	0.0432613	0.323511
Tinf2	0.149124	790.648	2.02086	0.0432939	0.323546
Rc3h2	-0.147857	998.737	-2.02013	0.0433694	0.323901
Jam2	-0.11616	38.7415	-2.01859	0.0435298	0.32489
Thg1l	0.14815	421.219	2.01758	0.0436352	0.325187
Egln3	-0.0987822	25.7408	-2.01753	0.0436403	0.325187
Col8a1	0.0851171	31.9877	2.0174	0.0436538	0.325187
Gpr89	0.133861	961.352	2.01682	0.0437142	0.325418
Shc1	-0.110079	3847.33	-2.01657	0.0437409	0.325418
Gon4l	-0.125288	2136.46	-2.01622	0.0437774	0.32548
Lrrc4b	-0.152549	274.52	-2.01589	0.0438116	0.325525
Rpf1	0.138067	1093.73	2.01448	0.0439589	0.326411
Mrpl17	0.123759	1908.03	2.0128	0.0441354	0.327511
Cr1l	0.140435	744.35	2.01198	0.0442217	0.327942
1110059E24Rik	0.148471	409.801	2.01171	0.044251	0.327949
Pskh1	-0.14351	731.856	-2.00969	0.0444635	0.329314
Atad2	-0.113507	5930.89	-2.00865	0.0445739	0.329921
Ube4a	-0.133581	1382.66	-2.008	0.0446434	0.330023
Cables1	-0.0816937	17.7801	-2.00798	0.0446458	0.330023
Trim3	0.147054	519.437	2.00772	0.0446732	0.330023
Atg4d	0.141688	1301.3	2.00724	0.0447239	0.330188
Hgh1	0.134079	1049.97	2.00686	0.0447642	0.330275
Eif4a1	0.0992509	23058.8	2.00654	0.0447985	0.330318
Szt2	-0.150312	431.812	-2.00624	0.0448303	0.330318
Shroom4	-0.152541	272.88	-2.00601	0.0448555	0.330318
Cmtm4	0.129078	2024.48	2.00566	0.0448928	0.330382
Nuak2	0.0202134	1.92127	2.0048	0.044984	1
Slc25a16	-0.14759	417.851	-2.00405	0.0450644	0.331317
Atp6v1h	0.123512	1738.83	2.00394	0.045077	0.331317
Pla2r1	0.146763	140.453	2.00336	0.0451385	0.33136
Adck2	0.146777	450.623	2.00331	0.0451437	0.33136
Utp18	0.119477	1879.08	2.00308	0.0451685	0.33136
Whrn	-0.138661	722.011	-2.00258	0.0452219	0.331542
Furin	-0.137975	1222.84	-2.00061	0.0454349	0.33279
Tmed3	0.13373	878.516	2.00047	0.0454496	0.33279
C1qtnf1	0.0538006	8.80902	1.99947	0.0455571	0.333056
Syvn1	-0.137633	1090.52	-1.9989	0.0456188	0.333056
Trpm1	-0.139012	940.01	-1.99874	0.0456365	0.333056
Oxr1	-0.133925	843.198	-1.99839	0.0456745	0.333056
Tarbp1	-0.145932	601.898	-1.99835	0.0456786	0.333056
Mpnd	0.132339	1606.32	1.99817	0.0456977	0.333056
Abcf3	0.124987	1371.96	1.99817	0.0456986	0.333056
Tnpo3	0.112898	6096.19	1.99801	0.0457158	0.333056
Mus81	0.150222	298.021	1.99713	0.0458115	0.333543
Pcif1	0.12879	1224.44	1.99676	0.0458511	0.333622
B3gnt3	0.123803	83.1159	1.99642	0.0458879	0.33368
Gnl1	0.116203	1988.44	1.99452	0.0460956	0.334981
Slc30a5	-0.132087	1610.91	-1.99412	0.0461391	0.335086
Akt1s1	0.120359	2862.6	1.99363	0.0461927	0.335124
Zgrf1	-0.151277	264.732	-1.99329	0.0462301	0.335124
Cdk20	0.150055	209.085	1.99328	0.0462309	0.335124
Adamts9	-0.0959196	26.02	-1.99249	0.0463173	0.33554
Gadd45gip1	0.129779	1706.16	1.99183	0.0463894	0.335852
Mtrr	-0.135411	719.148	-1.99121	0.046458	0.336139
Echs1	0.122582	1671.88	1.99006	0.0465844	0.336843
Tcea3	-0.0620934	8.27839	-1.98861	0.046744	0.337787
Ndufa11	0.137028	1270.8	1.9882	0.0467897	0.337906
Man2a2	-0.131923	1219.28	-1.9876	0.046856	0.338109
Sun1	-0.125434	1195.04	-1.98726	0.0468934	0.338109
Gemin6	0.145323	407.735	1.98715	0.0469052	0.338109
Celf2	-0.12446	3930.62	-1.9865	0.0469783	0.338425
Rassf8	0.144194	541.204	1.98253	0.0474195	0.341391
Abcc2	0.0405007	7.9386	1.98219	0.047458	0.341456
Mrpl52	0.148563	838.605	1.98167	0.0475161	0.341662
Fbxo2	-0.149308	182.904	-1.98054	0.0476427	0.34236
Dhx9	-0.105879	8192.21	-1.97997	0.0477073	0.342612
Arhgap35	-0.122136	4076.05	-1.9796	0.0477481	0.342656
Iqgap3	0.122575	3005.62	1.97939	0.0477725	0.342656
Ceacam1	-0.0956449	23.1168	-1.97899	0.0478171	0.342763
Tfap2b	0.0185323	2.04266	1.97755	0.0479801	1
Mblac2	-0.146453	132.205	-1.97742	0.0479943	0.343571
Chml	-0.146162	137.051	-1.97721	0.0480176	0.343571
Ids	-0.146387	641.001	-1.9772	0.0480187	0.343571
Tpd52l1	-0.139242	921.292	-1.97541	0.0482213	0.344808
Swt1	0.147764	204.982	1.97475	0.0482968	0.345135
Atp11c	-0.145973	605.969	-1.97426	0.0483523	0.345318
Mylip	-0.149726	199.632	-1.9738	0.0484042	0.345411
AW549877	-0.129627	1070.5	-1.97362	0.0484249	0.345411
6430550D23Rik	-0.0440206	3.71079	-1.97265	0.0485354	1
Ldlr	-0.113	4550.45	-1.97217	0.0485902	0.346377
Hip1r	-0.146093	470.874	-1.97118	0.0487032	0.346668
Lpin2	-0.136738	743.057	-1.97104	0.0487198	0.346668
Sash1	-0.120166	2096.24	-1.97103	0.0487208	0.346668
Pcbp1	0.119502	16396.1	1.97071	0.0487568	0.346712
Zfp362	-0.147006	443.26	-1.96957	0.0488876	0.347307
Ssr4	0.124964	1689.05	1.96946	0.0489004	0.347307
Ubr1	-0.133359	1402.51	-1.96885	0.0489698	0.347587
Pde10a	-0.138458	93.0572	-1.96822	0.0490425	0.347682
Gramd4	-0.145066	411.342	-1.96822	0.0490433	0.347682
Slc38a6	-0.149447	306.838	-1.96684	0.049202	0.348571
Pitpna	0.107163	4233.46	1.9666	0.0492288	0.348571
Tmem216	0.132534	81.386	1.96609	0.0492885	0.348781
Arl15	-0.148631	339.37	-1.9654	0.049368	0.349039
Nucb2	0.147288	255.163	1.96502	0.0494118	0.349039
Tmem126a	0.13111	1689.46	1.96499	0.0494153	0.349039
Cubn	0.138508	782.508	1.96378	0.0495561	0.34982
Parva	-0.117033	2223.69	-1.96294	0.0496533	0.349959
Tbrg4	0.111648	3024.55	1.96287	0.0496616	0.349959
Mipol1	-0.148263	169.325	-1.96278	0.0496717	0.349959
Rabepk	0.139242	686.907	1.96241	0.0497146	0.349959
Npnt	0.14535	210.897	1.96231	0.0497268	0.349959
Eif5a	0.110488	33064.1	1.96121	0.0498545	0.350181
Mlkl	0.128407	1136.54	1.96112	0.0498652	0.350181
Mvb12a	0.114157	2209.44	1.96098	0.0498809	0.350181
[truncated: 10,646 more rows]

[truncated: 6 more sheets: DEG_koTraf3_IFNg, ATACseq_diffpeaks, ATACseq_RP, ATACseq_KEGG, ATACseq_BP, ATACseq_Toolkit]
