# Supplementary material for: Therapeutically Increasing MHC-I Expression Potentiates Immune Checkpoint Blockade
Source: Oxford University Press journal article supplement (doi:10.1158/2159-8290.cd-20-0812), 2021-02-15
Supplement: 21598290cd200812-sup-244871_3_supp_6826076_qmj3gs.xlsx [file 21598290cd200812-sup-244871_3_supp_6826076_qmj3gs.xlsx]

## Sheet: koTraf3_signature
HLA-A	1
STUM	0.943375
MAP3K14	0.804272
NFKB2	0.720121
NFKBIE	0.640698
IRF8	0.630424
KIAA1522	0.608158
CXCL10	0.544273
CYBA	0.532159
LGALS3	0.531216
CASP4	0.520841
ADCK3	0.460553
NFKBIA	0.420953
SLC2A6	0.408003
TTN	0.395908
BTN2A2	0.39547
PLSCR1	0.390949
TUBB3	0.390526
SERPINA3	0.387847
CD9	0.37946
FRMPD1	0.376919
CTSH	0.374156
GLIPR2	0.367215
NDNF	0.36547
RPPH1	0.361199
ZBP1	0.356762
CASP12	0.353745
ANXA1	0.350766
TNIP1	0.350524
HPSE	0.347489
IFNGR2	0.347133
RELB	0.344344
ANXA4	0.341414
NUDT7	0.34034
RGS16	0.339804
LSM5	0.329316
SLC11A2	0.325985
ECSCR	0.325898
DNM1	0.325336
IFI16	0.3245
TNFRSF9	0.31626
CCDC122	0.314936
PSMB9	0.309842
PSMB10	0.30901
CSTB	0.308269
JUNB	0.307863
TMLHE	0.304523
TEX30	0.302806
VAMP5	0.301325
ZNHIT3	0.299064
KLF6	0.297792
PSTK	0.29393
MED31	0.29083
VAMP7	0.290258
RPA3	0.289316
DNAJB9	0.288239
ZNF25	0.28736
NQO1	0.286432
IFRD1	0.285957
PLEKHA2	0.285701
CAPG	0.285203
CCL15	0.283807
C1R	0.281588
ARHGEF40	0.281206
MGST1	0.280702
CMTR2	0.280509
SERPINB9	0.280224
PYCARD	0.279813
RAP1B	0.279745
KBTBD8	0.279369
MRPL53	0.278337
CDKN1B	0.277947
MAD2L1	0.277193
SPRYD7	0.276351
ZSWIM7	0.276241
TMOD1	0.27613
JAGN1	0.275596
CCDC58	0.275545
HSCB	0.275414
MRPL14	0.274488
VBP1	0.273683
CYB561D2	0.273542
ETFA	0.273036
MOCOS	0.272647
FBXL5	0.272047
ID3	0.271888
MRPS16	0.271879
CIB1	0.271106
CCT4	0.270479
CNIH4	0.270242
TMEM42	0.269929
IL12RB1	0.268912
PEX7	0.268392
MTRF1	0.267584
GSTA5	0.267381
CCNE2	0.266386
ATP6V1F	0.266311
ERGIC2	0.266188
NAE1	0.265641
ARHGDIB	0.265009
PHB2	0.264913
ISCA2	0.264752
MRPS24	0.264341
GADD45GIP1	0.2643
AMN1	0.26359
HSPA13	0.262709
FKBP11	0.262384
TRNAU1AP	0.26176
CEP44	0.261563
MRPL35	0.261167
NT5C3A	0.260807
TSEN2	0.260759
RBM7	0.260179
ATF3	0.259033
UBE2V2	0.25881
SEC13	0.258792
PIGP	0.258784
ZNF442	0.258563
BIRC2	0.258303
FASTKD2	0.258074
PCGF1	0.257427
BOLA3	0.257325
SAT1	0.256786
CHAC2	0.25678
ZNF616	0.256392
RPP30	0.256352
DGUOK	0.255731
HSPE1	0.255686
BIRC3	0.255669
TAPBPL	0.25561
POLR1C	0.255485
ALG6	0.255344
COMMD2	0.255287
NUDCD2	0.255266
USE1	0.254891
TMED2	0.254652
CHCHD6	0.254447
RTRAF	0.254433
UFM1	0.254429
SMS	0.254367
RFC3	0.253828
TRNT1	0.253638
RPAIN	0.253166
TANK	0.253141
BET1	0.252606
TRAF2	0.252543
MED30	0.252423
ALKBH7	0.25187
SAR1B	0.251081
TAF1D	0.250927
SP140	0.250891
CHADL	0.250503
MRPL22	0.2505
KIT	0.250465
PTPN18	0.25046
PSMA5	0.249975
DCAF13	0.249866
TRMT10C	0.249672
SEC61B	0.249391
ECHS1	0.249337
RNF7	0.249328
NAMPT	0.249309
PDCD10	0.249251
FAM104A	0.249193
ATOX1	0.248918
PPP1R35	0.248511
ARL1	0.248501
TAPBP	0.247804
C4orf3	0.247712
CAV2	0.247505
CNEP1R1	0.247101
B9D1	0.246671
SDF2L1	0.246253
COPS3	0.245977
MANF	0.245896
MRPS10	0.245795
TES	0.245474
HINT1	0.245394
EPS8	0.245219
NFU1	0.244917
GBP6	0.244844
PEX13	0.244782
TMEM219	0.244449
APH1B	0.244334
YIPF5	0.244133
SSR4	0.244051
HLA-E	0.243719
LSM7	0.243364
PGRMC1	0.242503
SELENOS	0.242403
GNG10	0.241309
C20orf144	0.240994
B9D2	0.240986
FGFR1OP2	0.240861
NT5C	0.240438
IDI1	0.240426
KLHDC2	0.240285
CNBP	0.240081
RPL37	0.240024
SERP1	0.239874
ITGA4	-0.188966
WWC1	-0.189062
GPATCH8	-0.189255
ARHGEF17	-0.189417
GAS7	-0.189446
EIF4G1	-0.189509
CYP26B1	-0.189531
GTF2I	-0.189541
MEF2D	-0.189543
FARP1	-0.189702
PKNOX2	-0.189962
NOLC1	-0.190144
ARHGAP32	-0.190271
SETD1B	-0.190449
ENG	-0.190638
NOL6	-0.190984
PDXDC1	-0.191158
MTR	-0.191679
IK	-0.191807
CHSY1	-0.191838
SLC35F1	-0.192295
PHLDB2	-0.19257
TRAK1	-0.193184
DGKZ	-0.193302
MACF1	-0.193386
SORT1	-0.193464
PLD1	-0.193565
ANKRD50	-0.193742
ARID5B	-0.194257
ATRNL1	-0.194549
DLC1	-0.195264
IRF2BPL	-0.195487
SARDH	-0.195673
CEP250	-0.196051
PRUNE2	-0.196165
RASGRP3	-0.196211
FLNA	-0.197015
MARVELD1	-0.197036
PLXNB2	-0.197461
PTPN14	-0.197532
NEO1	-0.197856
CRIM1	-0.197857
CHN1	-0.198097
SCD	-0.19856
SAP130	-0.198578
PPP1R37	-0.198846
TRIM56	-0.198951
ZMAT3	-0.199291
LTBP3	-0.200546
PABPC4	-0.200831
SSBP4	-0.200847
MSN	-0.200919
DGKD	-0.200941
ANP32A	-0.201173
ADAM23	-0.201208
GPR56	-0.201639
ZNF704	-0.201798
CEP170B	-0.201875
ANKRD34A	-0.202209
CNTFR	-0.202586
MAP4K4	-0.20261
DBN1	-0.20359
PRRC2B	-0.203664
PKD1	-0.203815
PHYHIPL	-0.203884
FADS2	-0.204189
BAG6	-0.204364
NACC2	-0.204462
DAAM2	-0.20517
DCDC2	-0.205546
MEGF8	-0.205547
SORBS3	-0.205582
CDC42EP1	-0.206241
AMOTL1	-0.206601
AFAP1L1	-0.206611
BAHCC1	-0.20674
SNX25	-0.207237
SALL2	-0.207311
DAB2IP	-0.207692
ANP32E	-0.207891
LPGAT1	-0.208187
EIF4EBP2	-0.208862
ARMCX4	-0.209274
CDON	-0.209425
BCOR	-0.209679
DENND1A	-0.209699
RNF44	-0.209949
LAMC1	-0.210389
POU3F2	-0.210391
BRD1	-0.210692
HAP1	-0.211482
ANKRD52	-0.211837
EEF2K	-0.213041
RGS3	-0.213143
FLYWCH1	-0.213767
SMARCC2	-0.214245
PRSS12	-0.214679
MTCH1	-0.214797
MEX3A	-0.215339
MCC	-0.215411
TNS2	-0.216445
PYGO1	-0.216636
SCAMP2	-0.21704
IGFBP4	-0.217696
RUSC2	-0.217718
KCTD17	-0.217979
CA14	-0.219295
PIGT	-0.219858
APLP2	-0.219959
CD276	-0.220507
SORBS1	-0.220788
TNS3	-0.221179
TARBP1	-0.221675
PRDM16	-0.221877
ANGPTL2	-0.222276
SOGA1	-0.22285
PITPNM2	-0.223471
MARCKSL1	-0.223553
HUNK	-0.224039
TULP4	-0.224506
TLE3	-0.225776
C2CD2L	-0.22583
ADAMTS4	-0.226641
TTYH3	-0.228078
ATF5	-0.230131
TNS1	-0.230526
SEPN1	-0.231093
MAML3	-0.231304
SDC3	-0.23281
TENM4	-0.232832
ITPKB	-0.232896
NOTCH1	-0.233124
SLC25A23	-0.233256
DAG1	-0.233722
TBC1D16	-0.234522
GJA3	-0.235391
PKDCC	-0.235677
PRSS23	-0.235962
DDAH1	-0.2363
NIBAN2	-0.236642
CEMIP2	-0.237254
TMEM132A	-0.237553
CLMN	-0.237779
CFAP54	-0.238527
SVIL	-0.238702
CORO2B	-0.241239
CKB	-0.241662
R3HDM2	-0.241851
RNF144A	-0.244476
PTCH1	-0.245315
MASP1	-0.246055
FILIP1	-0.246157
CITED1	-0.246793
SDK1	-0.247394
RAB11FIP4	-0.248018
DPYSL3	-0.248769
IGF2R	-0.249643
CSNK1E	-0.250016
SMC1A	-0.251863
PHF2	-0.253546
SIDT2	-0.254825
RASSF2	-0.25727
TUBB2B	-0.258047
BCAN	-0.258235
TCF7L1	-0.260982
COL5A3	-0.261759
PARVB	-0.261843
ABCA12	-0.266859
COL4A2	-0.267791
LMO1	-0.269342
CTDSP2	-0.269359
CLSTN1	-0.269915
LIMCH1	-0.276486
ARFGEF3	-0.277065
SHISA2	-0.278286
CDKN1A	-0.279862
CNTN1	-0.280469
MAN2A2	-0.286097
ALDH2	-0.290928
ATG9A	-0.293398
ADAM12	-0.29352
SLC44A3	-0.304599
MEST	-0.305678
PBXIP1	-0.306663
AKAP12	-0.308582
SULF2	-0.310296
CELSR2	-0.314626
SEMA6A	-0.318127
ITGB5	-0.319658
ENAH	-0.320748
CYFIP2	-0.32101
FRZB	-0.335055
NES	-0.338127
KANK4	-0.352128
CLVS1	-0.363886
KIF26B	-0.367045
COL4A1	-0.438361
MBP	-0.500139
FSCN1	-0.548936
CARMIL2	-0.56743
