# Supplementary material for: Therapeutically Increasing MHC-I Expression Potentiates Immune Checkpoint Blockade
Source: Oxford University Press journal article supplement (doi:10.1158/2159-8290.cd-20-0812), 2021-02-15
Supplement: 21598290cd200812-sup-244871_3_supp_6826077_qmj3gs.xlsx [file 21598290cd200812-sup-244871_3_supp_6826077_qmj3gs.xlsx]

## Sheet: Sheet1
DataSetID	CancerType	Sample/Patient	Treatment	Year	PMID	Journal	Corresponding
Kim2018_PD1_mGC	Gastric cancer	61	pembrolizumab	2018	30013197	NatMed	Won Ki Kang
Nathanson2017_CTLA4_Melanoma	Melanoma	24	aCTLA4	2017	27956380	Cancer Immunol Res	Jeff Hammerbacher
Hugo2016_PD1_Melanoma	Melanoma	26	aPD1	2016	26997480	Cell	Roger S Lo
VanAllen2015_CTLA4_Melanoma	Melanoma	38	aPD1	2015	26359337	Science	Levi A Garraway
Gide2019_PD1+CTLA4_Melanoma	Melanoma	57	aPD1+aCTLA4	2019	30753825	CancerCell	James S Wilmott
Gide2019_PD1_Melanoma	Melanoma	63	aPD1	2019	30753825	CancerCell	James S Wilmott
Riaz2017_PD1_Melanoma	Melanoma	68	aPD1	2017	29033130	Cell	Timothy A Chan
Liu2019_PD1_Melanoma	Melanoma	144	aPD1	2019	31792460	Nat Med	Dirk Schadendorf
Prat2017_PD1_NSCLC-HNSC-Melanoma_Nanostring	Pancancer	65	aPD1	2017	28487385	Cancer Res	Enriqueta Felip
Miao2018_PD1_RCC	RCC	35	aPD1	2018	29301960	Science	Eliezer M Van Allen
Mariathasan2018_PDL1_Bladder_mUC	Urothelial cancer	348	aPDL1	2018	29443960	Nature	Thomas Powles
