# Supplementary material for: Therapeutically Increasing MHC-I Expression Potentiates Immune Checkpoint Blockade
Source: Oxford University Press journal article supplement (doi:10.1158/2159-8290.cd-20-0812), 2021-02-15
Supplement: 21598290cd200812-sup-244871_3_supp_6826078_qmj3gs.xlsx [file 21598290cd200812-sup-244871_3_supp_6826078_qmj3gs.xlsx]

## Sheet: RNAseq_rawcount
	S12-24550_high	S13-56716_high	S14-43413_high	S15-55333_high	S14-04739-A4_high	S14-4793_low	S15-56658_low	G13-77628_low	S16-35474_low	S14-53113-A1_low
MIR648	4	7	17	0	18	3	28	23	28	37
PYCR2	802	236	441	278	683	98	570	313	1114	860
HERC3	878	499	605	498	1852	452	417	811	527	614
ETNK1	821	810	743	914	1011	210	3041	739	1685	2749
HERC4	681	1190	705	1470	2799	407	1969	917	3049	1807
UBE2N	563	485	214	742	1670	200	1651	823	1100	894
CLEC12A	9	104	45	25	310	0	10	3	70	6
PARP8	1036	1696	948	382	1579	97	2970	214	1424	2967
EIF4B	3250	2130	1627	3417	4831	1208	16875	1623	4773	13015
STAT5B	1322	703	1180	953	2029	520	2027	1177	1809	1722
SLC25A24	790	634	359	1109	1926	254	875	804	1632	993
SNORD6	10	15	12	11	18	51	30	44	36	30
MXD1	110	92	66	95	121	26	232	105	103	192
NLRP3	143	124	181	137	465	3	46	416	86	94
CD40	516	592	303	147	914	82	87	131	100	809
SNORD11	7	13	4	18	70	12	42	11	18	46
FCRL1	16	105	27	17	22	0	0	0	8	0
ERC1	1635	1288	1548	1494	4350	2468	2164	1240	2668	3709
TMPRSS9	8	3	15	0	3	0	10	0	32	11
CNNM2	305	371	335	410	1046	7	767	289	842	1392
KLF5	28	19	43	57	286	52	882	93	75	305
DSCAML1	41	7	10	1	19	3	24	0	32	30
TMEM98	781	384	402	322	454	61	1768	477	933	1418
TPTE	3	1	0	1046	0	5	0	1	3	0
FIG4	499	549	413	635	1980	180	593	1159	1249	569
GPATCH11	222	125	106	177	460	49	803	298	272	661
TRIM23	567	263	327	312	459	216	397	314	580	381
GALNT1	767	541	494	1224	3381	465	3770	2194	2017	3178
SSR4P1	5	0	1	0	6	0	3	3	5	3
WAC	1945	2734	1418	3861	5783	887	8974	7946	4946	6065
SGF29	142	72	131	178	225	1	333	69	152	506
ADAM8	68	146	220	47	266	22	99	41	100	70
ZNF454	3	0	4	20	28	2	205	134	9	439
WEE2-AS1	2	3	5	2	0	0	0	0	0	1
C6ORF58	1	0	2	0	4	0	4	0	0	5
GZMM	4	12	9	2	73	0	0	0	18	8
SEL1L3	114	952	868	272	1996	32	908	219	239	1247
NFATC3	1364	1174	818	1218	2371	872	2727	1403	3348	2816
ECD	724	659	472	1319	1945	190	2152	772	1680	1657
XKR6	107	15	54	5	17	3	58	61	108	232
MSH4	4	6	14	16	4	53	82	12	20	71
UBE2K	501	392	277	496	1281	221	1382	589	900	831
HAND2	1	5	0	1	17	0	649	0	0	498
LINC01126	3	2	1	5	11	1	10	1	4	25
RRS1	144	114	118	307	266	83	665	184	208	547
SNAI2	528	1382	535	1184	1519	1226	3799	1716	993	1371
CTSB	1549	4983	5773	8228	15317	391	2387	1946	12480	2035
DAZAP1	1045	618	623	1066	2344	371	2458	746	1877	1749
EXPH5	12	22	19	158	206	17	758	399	9	733
LEPROT	220	135	98	420	437	73	439	287	349	496
MRM2	209	131	151	210	925	105	485	388	401	1003
AKR1A1	442	657	562	767	2743	237	1255	1382	1398	1292
STK11	376	160	309	317	719	124	447	181	625	586
SELENOV	0	1	0	0	0	0	36	10	67	74
HIST1H3F	273	398	515	690	1500	509	5129	760	703	3155
PPIP5K1P1-CATSPER2	83	20	17	37	41	0	0	4	27	6
NDUFB11	587	151	218	220	353	78	474	183	219	525
MCTP1	117	179	241	209	1754	136	108	101	353	135
CRTAC1	501	1780	510	1129	45	336	199	371	125	532
ARHGEF17	653	450	771	1038	1924	500	668	1549	2747	1619
PRR13	1129	845	447	1121	1487	250	620	960	1202	988
BST2	368	1205	544	1371	1395	13	39	249	758	198
CHORDC1	1356	486	274	441	851	279	1907	1877	637	1439
ZCCHC11	2610	1704	1391	2768	5694	926	7458	5792	3920	8979
VCX3A	8	0	1	1	1	0	0	0	0	1
ANKRD29	7	7	9	6	48	7	96	10	8	106
SNORD115-1	1	0	4	0	0	0	0	15	0	0
CCND2	27	184	185	65	313	33	2540	70	37	2333
IGLL1	0	2	2	0	4	0	3	0	0	0
ASNSP1	1	1	0	15	0	0	86	0	0	245
TBX4	2	6	29	0	30	0	12	1	6	2
SCN2A	29	49	3	0	37	27	1902	10	4	5279
HKDC1	453	12	313	25	41	0	0	3	25	14
DENND1A	885	753	1143	748	1612	413	1108	962	1304	1638
MRS2	331	243	319	812	1268	201	610	449	617	1187
TMEM223	87	75	61	93	161	37	173	101	168	165
URB2	374	150	243	274	668	149	982	279	681	1017
MISP	0	1	19	1	0	0	2	0	0	2
TDRD12	3	2	2	1	6	194	778	2	0	346
CD83	156	154	127	155	820	20	207	234	378	467
MYT1	3	2	3	11	4	17	49	1	43	162
LOC101927151	4	8	12	14	19	3	24	10	1	8
MIR1183	1	8	6	4	15	0	13	19	4	38
CDK5RAP1	795	438	253	428	1211	115	511	441	886	954
NSUN5	365	118	145	93	205	35	330	118	244	329
MPND	236	101	158	97	229	69	170	144	469	305
SEMA7A	228	196	145	209	279	58	249	95	504	552
CEP72	145	74	88	78	591	64	659	80	307	1279
DNAJC30	127	35	32	34	60	12	80	60	78	80
CD320	620	248	375	419	562	164	295	233	1248	403
PKP4	2142	721	737	2086	3401	898	7032	1787	3009	6462
SNORD135	3	1	0	1	3	5	3	3	3	1
C1GALT1	198	343	285	214	770	265	804	1321	650	870
TMEM41A	72	52	68	78	101	41	128	83	235	212
EIF1B-AS1	0	2	0	0	0	4	3	0	3	0
SUPT7L	1217	428	402	760	896	211	1773	348	990	1415
ZNF488	0	1	0	0	0	0	26	0	1	23
RP9	337	260	215	260	1217	141	957	775	431	567
GALNT16	13	0	10	45	105	36	18	5	69	59
BIRC2	944	691	454	871	3923	347	1855	2013	1644	1853
HNRNPA3	2438	1548	1221	2981	6966	1209	12036	1135	3846	9015
ATPIF1	267	193	171	365	699	116	975	279	388	1092
PEX19	1897	1736	1299	2262	3258	487	5352	2361	3529	7737
REV1	1040	682	512	944	2558	499	1727	582	1628	3109
PILRB	3	20	4	3	12	18	13	5	6	14
UGT2B17	0	1	5	0	35	0	0	0	0	0
MRPS22	329	124	121	278	556	100	621	321	467	576
PRRT3-AS1	0	10	3	13	22	11	10	7	49	9
FLRT1	23	8	3	3	0	25	235	113	86	404
GTF3C5	302	199	377	657	952	338	1357	624	1051	2593
MRNIP	258	130	140	133	139	56	211	157	299	297
SF3A3	1611	882	611	1984	3893	713	3745	1401	1982	3614
ST3GAL2	249	111	320	302	323	108	405	284	1446	701
LOC441455	14	13	6	75	133	44	73	13	36	328
RNF220	604	428	488	860	1113	273	2276	424	1540	1681
NRL	3	4	12	6	16	0	4	21	10	5
ECI2	486	382	387	1053	1127	217	907	1001	1399	847
DYNC1I2	1286	758	593	1351	2875	421	3254	1066	2341	2543
C1ORF228	19	42	18	9	112	0	72	44	31	56
LINC02506	0	0	0	0	14	0	0	0	0	0
BBS1	808	297	313	549	1784	209	912	482	1034	1536
HLF	6	3	5	1	21	41	31	10	6	32
RHEX	1	0	2	0	11	0	2	0	1	0
SNORD113-1	0	1	0	0	0	0	8	0	1	8
CAST	4166	4447	3323	4190	9703	1232	2296	3494	7726	2137
PPP1R18	570	551	722	1466	2351	136	726	301	1030	1784
VCL	1770	1758	1964	2875	8022	1027	5681	2595	5637	5961
KLK6	3	0	1	0	6	39	6	0	6	79
MARF1	2553	2038	1514	2882	3297	1156	3598	1549	3237	4937
KIAA1147	435	119	208	61	238	54	386	59	238	467
NAPSB	10	93	61	14	82	2	2	37	31	12
ZNF114	7	2	11	323	162	29	53	76	116	85
FAM120A	4575	2257	3160	5331	8981	2137	3725	3186	8953	4678
KLHDC2	351	346	215	483	1324	133	870	554	1113	796
ACHE	25	15	18	3	10	0	29	6	7	51
ZNF843	3	2	4	3	5	0	2	1	5	5
FNDC1	20	46	63	137	968	100	140	25	55	454
SMARCB1	562	870	866	1252	2500	450	6718	2267	2017	6242
DAG1	2097	2844	2292	4624	15215	954	1412	4681	24134	2145
TST	23	7	24	3	105	30	56	44	106	93
SPINT2	20	70	127	21	159	5	110	40	22	436
TGFB2	34	28	24	29	52	5	106	18	5	451
TMEM50A	708	796	352	1393	1515	223	823	940	1198	796
SLC25A45	68	82	51	93	116	57	22	40	156	30
SNORA80A	63	19	20	9	30	23	18	26	34	24
SAMD4A	1704	871	994	1291	1669	917	1779	966	2414	1114
SOX6	1296	55	586	385	2243	1653	3183	627	1802	1753
FLT3	34	49	28	21	140	12	6	1	28	8
ZFP14	79	130	110	137	257	84	211	210	281	252
LOC101927045	8	2	3	9	7	2	7	2	9	1
SLC10A3	127	94	101	126	329	36	111	57	325	268
LOC100507477	7	7	4	1	3	0	0	3	1	0
ZNF788	56	58	87	117	398	103	80	298	170	131
ANKZF1	441	337	262	336	733	222	847	183	518	1211
TFF3	11	6	3	6	44	0	0	4	9	0
ADAM1A	129	33	71	67	471	66	603	87	239	1153
TARBP2	146	167	108	155	216	67	468	135	483	647
BAG4	243	273	410	597	430	235	1555	396	923	589
EIF2AK4	4343	2019	1767	2444	4090	591	3580	1615	6541	5245
PICALM	5907	4783	2497	8739	12311	1800	7269	12035	11316	7144
PSMB6	456	276	179	325	840	92	606	264	575	639
USP9Y	4	14	7	8	5712	0	2	4	5977	0
LANCL3	6	1	1	0	5	0	3	0	1	12
LZTS2	299	312	338	316	892	127	890	449	1068	1221
TFCP2	830	312	338	655	1508	271	449	834	1278	2591
WDR72	1	1	0	2	55	0	10	0	295	320
CREB1	464	326	309	552	961	211	1745	388	695	1775
TSEN2	267	276	337	463	1415	350	555	494	1161	692
TMSB10	3962	4068	2645	2765	10994	772	7753	3780	7614	8269
TECTA	245	35	53	34	92	17	223	27	98	679
FBXO36	10	4	10	6	75	0	37	16	16	77
ZNF345	89	48	128	179	265	323	176	161	139	242
PPP1CB	2502	1710	975	2084	5165	725	6613	1497	2875	4569
MORN3	5	6	2	0	19	0	9	0	4	16
CD96	37	793	147	148	707	5	17	20	35	62
ANKRD20A11P	57	11	2	1	16	0	415	0	10	773
AGPAT5	195	163	174	163	343	71	1396	136	707	556
MAPK15	44	4	7	22	99	0	168	3	31	617
JAGN1	84	137	170	270	456	28	299	248	592	313
ACVR2B	231	196	215	335	1302	150	984	444	1007	809
TSPEAR-AS2	12	1	3	0	1	0	238	5	0	176
INSIG1	223	161	223	167	877	96	468	367	540	425
ELP3	574	452	585	705	978	215	2767	981	1516	1258
STAG1	1528	682	889	1300	3044	716	4027	1004	3060	4118
CD79A	3	38	115	24	329	0	1	10	16	6
C3ORF18	77	46	48	6	210	0	30	4	250	35
OIP5-AS1	61	30	39	38	36	17	101	10	74	66
CCSER2	728	957	663	1401	2660	313	1206	1510	2358	1297
KLC4	159	180	222	400	400	240	478	226	339	630
STARD10	76	159	132	148	470	5	130	434	338	244
ZNRF1	61	77	96	144	232	85	242	120	410	458
PHF8	1769	477	530	653	1309	262	1158	511	833	1798
LOC101928000	1	0	0	4	2	0	2	1	1	3
SYN2	1	5	0	0	3	0	85	0	9	150
TRMT112	231	139	131	189	190	52	362	149	355	339
RNF219	186	139	220	238	375	136	539	333	541	731
FAXC	94	84	76	151	396	17	226	317	784	159
PRRC2B	4010	2222	2517	3566	5277	2236	10654	3514	10523	14596
ABCE1	1001	485	504	952	2466	467	2744	1467	1807	1702
CCDC34	172	87	64	198	363	110	1167	198	341	952
TXNDC5	17	35	49	42	103	71	37	35	118	123
TMEM184A	0	0	13	1	8	0	0	1	2	7
PLCXD2	7	43	36	3	44	10	16	8	17	30
TADA2B	136	106	126	131	180	60	210	190	326	227
TMCC3	163	56	36	22	56	18	58	50	71	44
PTDSS2	278	180	162	345	608	93	337	156	514	576
DNAJC28	6	9	4	14	22	9	7	17	12	20
PLA2G4B	4	4	3	0	0	3	5	0	2	6
KLHL12	1167	489	519	857	1743	315	1529	1373	1464	2050
MAJIN	0	4	2	0	7	0	26	0	0	19
CASP8AP2	486	369	414	417	1765	387	1973	2071	811	1834
CAV2	453	434	170	458	383	103	81	408	458	84
YIF1B	154	123	171	249	455	37	260	160	419	182
LOC646471	2	2	2	1	11	1	7	7	2	9
SLC39A6	1355	1705	1806	3162	5540	1132	4906	7242	9829	3047
PDXK	731	599	582	639	1208	233	535	684	1374	1046
FRMD6-AS1	0	1	1	1	6	1	6	6	3	2
CLUHP3	0	2	6	0	0	2	8	0	8	17
EPS8L1	66	29	28	44	113	68	50	23	173	138
LRRC45	380	161	294	228	878	40	398	309	821	959
OGDHL	22	28	68	2	55	0	374	1	19	400
ZC3H11A	10947	7235	7931	9230	23884	4595	28729	24068	20353	37686
LOC105371814	1	0	0	0	1	0	1	5	2	7
CGN	142	22	155	344	830	0	159	23	170	172
ZBTB25	162	191	167	175	459	71	210	145	372	177
GDAP2	461	488	477	1152	1334	188	1367	1779	1212	1394
GPR179	3	2	4	1	1	9	13	0	15	50
CD207	1	6	4	1	29	7	63	18	22	168
ANO2	32	25	22	24	71	3	253	31	44	233
ABI3BP	351	548	829	73	6042	938	310	156	227	348
NAB1	925	550	335	571	1314	447	2286	788	1247	2381
TPM4	1087	1703	1575	1852	6217	741	3639	2115	3052	3047
CXORF38	164	94	75	95	262	28	85	128	152	151
MBD4	634	363	351	360	1248	165	673	410	1053	1285
CCDC58	248	57	91	160	390	34	842	234	376	785
CDKL3	129	34	46	41	71	55	207	261	66	214
SNORA79B	6	30	23	26	46	7	48	15	56	24
FAM43B	2	0	1	0	0	0	25	0	0	40
ASIC1	5	24	6	85	23	52	270	21	106	506
MRPL4	892	249	335	423	688	188	344	240	760	283
ZNF664	2199	852	537	1248	2129	876	15440	2888	2453	7170
ELMOD3	255	190	162	236	475	127	267	316	483	436
ZNF333	878	243	342	239	802	288	877	314	768	1094
PRPF8	17182	12967	8757	12239	26523	3664	33195	13543	18350	26664
TMEM191A	1	3	1	2	13	0	0	1	29	0
UBE2DNL	12	0	0	0	0	0	0	0	0	0
SEMA3F	43	36	87	147	229	27	181	81	133	417
RIT1	338	239	256	317	712	23	469	501	535	1116
TTC4	3	1	0	3	5	4	6	2	3	4
ZNF56	0	3	3	0	2	1	7	0	0	7
ACSF2	357	181	242	414	585	149	294	238	389	884
MMP16	918	12	25	20	80	54	18617	215	20	17834
POFUT2	607	208	173	201	568	125	442	258	409	747
ATRX	8538	3632	4130	3418	12761	2324	9067	698	5765	19333
KIAA0895	112	129	47	74	363	17	245	607	234	378
POU5F1P5	28	18	24	47	108	0	42	6	72	83
ROCK1	1732	1557	1238	2489	7706	1135	7804	5720	4180	6295
OXTR	4	0	2	12	6	3	33	2	2	20
SRCAP	5790	4322	4413	8525	10186	2459	12471	3928	9636	21485
LOC100506497	0	0	0	0	0	4	11	0	0	2
ARHGEF26	582	90	47	74	279	73	941	224	763	1205
ZRANB2	3414	1292	1125	2311	2877	1367	4480	2480	2301	5521
GNS	1865	3415	1942	3438	4097	557	3336	2230	5250	3408
KCNA6	31	5	2	0	1	24	92	1	1	250
VIPR1	6	8	12	16	50	0	2	0	9	5
PCDHGB8P	122	5	124	64	27	41	62	103	77	373
LOC101927267	1	4	1	10	3	0	0	0	1	8
FAM20A	863	236	420	82	1379	25	1236	116	134	1770
ZNF805	400	351	390	389	842	114	695	414	936	792
PERP	30	75	83	139	404	106	262	195	192	211
LINC00641	5	23	51	19	66	28	43	93	36	22
A4GALT	21	27	51	25	152	0	212	12	20	150
C3ORF67	129	137	173	136	475	26	458	1	224	306
TMLHE	662	131	224	221	452	66	280	164	350	468
SLC2A11	58	83	98	75	199	27	261	156	154	505
LIX1L	420	548	441	656	1131	115	990	566	1305	951
RBBP9	56	112	67	99	138	23	139	58	249	256
BICDL2	0	0	6	0	7	1	1	0	0	1
RIDA	98	79	59	144	88	12	479	207	101	339
C8ORF89	0	0	2	2	1	0	0	0	0	6
LAMC2	6	34	103	3	169	142	19	5	13	15
MIR301A	2	0	0	3	2	0	7	6	5	11
VTA1	335	185	256	801	977	94	1112	772	595	722
TTPA	48	8	2	1	15	30	291	224	55	241
RTL5	314	47	16	12	68	14	138	13	28	452
FAM103A1	58	44	27	46	80	20	69	87	67	66
EPB41L5	765	186	181	433	1010	179	1026	521	628	1836
ZNF583	75	20	76	59	90	20	122	288	198	213
PAPOLA	2112	2373	1577	3789	8825	1883	6831	4093	6290	4943
UBE2E2	112	112	116	259	397	32	452	34	43	342
HDAC1	1143	800	603	1629	2535	567	3667	873	2435	2734
TPCN1	2478	1161	781	2484	3400	583	1667	1102	2332	1521
EFCC1	4	3	5	2	27	8	0	0	120	7
HOXB13	75	25	54	1	208	38	305	55	131	480
SMYD2	816	568	356	606	1447	460	2127	31	2618	3163
TMEM39A	901	340	427	462	657	152	1118	587	939	1570
NISCH	1269	1186	1744	2172	4128	1359	3378	2016	6498	4264
MRPL41	53	15	35	41	95	15	22	27	114	30
ADHFE1	114	158	175	450	184	199	309	282	256	223
INPP5J	3	10	45	3	182	3	62	18	53	56
GPR158	307	85	149	51	130	0	299	269	0	571
ZNF331	173	254	175	106	129	63	471	353	310	685
PIP4K2B	1178	444	588	992	1181	514	2635	1115	2833	2305
AATF	1374	473	601	1009	1557	330	1712	1287	1268	1105
LOC645752	121	5	2	0	2	11	0	2	0	1
ANGPT1	214	23	24	40	105	31	1870	45	20	489
CCL2	99	58	488	341	696	66	170	265	84	169
CCDC12	108	124	204	201	886	78	383	241	408	341
RPL23A	5926	3759	3457	3973	11365	1567	26114	3898	7955	20973
FGFR1	264	265	587	701	2514	422	11898	618	607	7629
DDX31	406	277	357	568	924	267	1179	712	1324	1512
MAMLD1	2217	979	1185	1051	2027	657	552	2476	1001	926
PTGER3	3	1	0	17	50	10	14	2	12	9
AIFM1	2113	498	727	854	3358	370	803	859	1039	1591
LOC105379514	0	6	2	0	8	4	0	39	0	0
DPY30	236	201	94	186	430	25	705	173	361	614
DLL1	41	37	107	71	142	20	74	44	79	151
SLC39A9	426	347	317	781	1345	252	523	383	1142	597
PLEKHG4B	6	4	7	10	23	0	638	2	7	1182
DRG1	364	434	496	345	1466	382	2376	1137	867	1621
S1PR5	1	2	2	8	8	3	3	10	4	3
ZNF733P	0	0	0	0	0	0	1	0	2	23
FRMPD2	0	14	0	0	0	0	0	0	0	0
ZBTB26	93	66	73	75	176	86	279	177	157	381
NID2	197	80	292	598	1393	192	1436	323	646	1624
FRMD7	10	1	2	0	13	0	0	0	0	0
SCUBE1	9	23	3	3	7	0	2406	4	16	2959
GCNT2	423	521	1027	1768	3299	1384	72	1124	4150	267
CD160	0	5	3	2	2	0	0	4	1	2
GCN1	4115	2319	2571	3131	5996	1794	11969	3290	5942	9161
MED16	693	233	399	323	558	116	506	389	663	580
PLEKHG1	327	224	216	866	2402	174	372	193	537	980
ATL1	21	167	39	30	198	9	159	103	127	316
CFAP43	24	59	15	22	65	0	148	17	49	181
WASHC5	2972	2039	1407	7139	6954	1117	7379	3539	4444	9241
PLEKHB1	932	44	334	27	182	33	2	190	36	38
RER1	2630	610	566	1616	2095	474	1930	6320	2062	1920
ARHGAP44	11	14	19	19	64	39	165	19	51	232
LOC100310756	1	10	3	2	19	0	6	3	4	3
FAM96A	455	257	213	260	950	150	422	262	335	597
WSCD2	0	1	0	0	1	0	0	0	0	9
CCDC186	538	595	348	487	1804	239	1696	1125	761	2647
SPTAN1	8151	8554	7929	14051	39261	4957	19396	10073	30631	42755
PRR12	1341	1019	1342	1201	2338	627	3632	793	3212	5637
SAGE1	0	0	3	0	0	0	0	11	0	0
LOC441204	5	1	4	0	7	9	8	7	18	9
FAHD2B	171	130	29	12	530	89	85	127	246	291
KCTD10	380	303	257	507	1412	138	689	359	843	545
GDPD3	116	22	14	55	47	16	65	8	126	179
RAD51AP2	0	0	0	0	0	0	3	0	0	16
FAM72C	13	1	4	6	11	1	51	22	19	29
ENTPD2	1	0	3	0	2	0	0	1	4	18
CNTNAP3B	266	80	151	168	118	16	469	62	395	934
SH3BP4	272	216	871	1668	3066	177	890	358	2726	683
PRDM8	5	20	32	18	62	18	11	0	8	37
THOC1	687	502	418	583	1637	428	2914	656	1282	2236
MS4A14	27	75	39	38	89	93	10	79	20	42
LINC02466	0	0	0	0	0	0	7	0	0	7
MGLL	324	59	187	122	885	71	840	26	177	1024
COQ9	2320	630	967	1096	1912	414	1175	449	657	2275
KCNE1	10	1	2	0	3	0	18	1	0	4
PLA2G4A	502	776	391	62	1530	184	726	769	561	631
A3GALT2	7	0	5	0	18	0	6	11	4	11
ZNHIT1	806	222	204	314	683	120	312	213	350	618
VPS28	764	647	463	971	548	195	1272	224	1039	1660
CIRBP	1655	1105	2052	1250	3959	811	3056	1038	2675	2103
ANO4	456	58	209	1	472	3	873	1	192	326
LAT	113	64	36	39	97	23	36	7	140	160
TDRD3	456	1238	1050	305	1575	286	1099	614	1041	1153
AXIN2	72	245	134	823	696	51	606	474	25	1495
TTC23	328	224	203	248	528	132	443	188	372	684
RLN1	2	1	0	2	2	0	3	1	1	1
GABRA1	1	0	0	0	0	0	17	0	0	15
KCNMA1	126	775	462	369	739	413	6118	199	140	479
KTN1	3499	2987	1785	5216	14404	1505	9363	9414	9126	8212
HIST1H2AD	1	0	1	0	5	0	2	0	1	1
LINC00681	2	8	4	2	0	1	0	1	4	0
KDM8	25	30	40	35	110	8	102	32	54	221
TP53INP1	222	466	210	851	675	49	530	379	641	841
WHRN	543	763	634	478	1905	160	173	349	2460	320
COQ3	65	23	60	26	221	28	83	206	100	60
IGIP	36	53	66	45	74	58	29	120	53	55
TJP1	6075	2514	2685	4162	10945	2311	6253	4123	5489	10524
MIR3911	1	42	2	4	9	0	22	147	2	10
CELF2	1041	1100	698	2084	3645	163	1317	1111	1968	1626
CTDSP2	2192	1212	772	1004	2181	502	4588	731	2112	3186
LCT	1	1	1	0	6	0	18	3	0	8
PEX1	2882	888	938	752	2371	516	2248	1295	1647	1943
NLRP2B	1	0	0	0	0	0	4	0	0	8
RIMBP3	4	14	30	9	20	0	8	41	95	29
ARRDC5	17	55	27	14	77	0	1	8	12	7
LINC00900	2	0	3	0	2	0	21	0	0	4
EXOSC10	2458	1266	848	2854	4156	1026	6727	1942	3705	7153
LOC730234	269	175	133	224	442	305	316	219	173	331
PCP2	0	4	0	5	7	0	0	2	9	2
MET	8081	12418	3320	948	3087	89	2415	18761	10316	3404
PPWD1	675	504	610	641	1180	426	1136	520	976	1455
CACUL1	234	434	231	609	1347	118	1113	712	1086	1493
MAST1	10	9	2	44	39	0	78	6	109	242
GPRASP1	718	142	334	126	365	45	494	216	379	1391
PKHD1	133	1	99	102	93	0	164	6	2	638
MIR1304	0	1	2	1	0	0	2	1	0	5
CLCN3	2055	1439	902	2047	3948	1175	3307	4175	3710	3059
TULP3	664	578	448	925	693	267	873	736	1495	1225
ATCAY	1	0	0	0	2	0	415	0	0	767
P3H3	99	259	297	111	293	78	1043	297	758	1853
SNORD134	0	0	2	1	2	0	3	1	7	8
CSDE1	8559	6671	6943	15509	13959	3218	36819	15064	10380	24113
DIP2A-IT1	1	0	0	2	2	0	2	1	1	2
PYGO2	97	64	76	97	139	8	211	106	267	253
HEXDC	413	268	271	139	254	75	290	114	235	443
LMBR1L	465	816	362	630	733	186	1252	573	1320	2240
TUBGCP5	1206	578	612	846	2928	225	1236	543	1500	1571
HBG2	75	0	0	0	0	0	0	1	0	3
ELP1	1957	1119	1121	1943	4614	750	3255	2934	4262	4535
F7	0	2	0	2	6	6	0	8	23	57
MYO9B	3484	4390	5575	5676	12901	3545	5773	6385	14062	6334
OPRL1	19	20	6	26	7	2	23	7	75	53
STARD6	0	0	0	1	4	0	5	4	0	6
KCNA7	0	0	0	0	0	1	2	3	2	4
GOLIM4	3134	825	885	1370	4640	907	8059	1685	2506	7868
C9ORF139	1	8	4	2	14	0	0	2	7	5
NIPAL1	10	14	16	7	29	40	139	11	103	83
FAM200B	72	113	91	182	260	105	386	403	273	314
NDUFAF8	74	29	30	58	115	25	112	41	80	155
MED8	410	227	181	443	706	51	670	365	396	790
SCAF1	673	362	561	510	947	184	1080	420	1022	1606
LRRC49	91	25	34	8	120	12	536	14	112	629
FAM118B	250	74	118	205	467	37	336	444	446	607
PTBP3	805	1035	812	1776	4360	437	2286	2512	3554	1815
CCDC151	24	35	2	0	7	17	10	1	6	12
PELI3	94	69	73	97	346	27	82	126	422	160
D2HGDH	263	127	245	200	460	109	332	72	682	696
RHOC	1508	550	901	1811	1549	200	1280	1280	2682	2214
SAP30BP	664	581	542	708	1279	246	1177	843	1104	1403
MTHFS	3	0	10	3	9	5	8	6	14	14
SNORD13	1205	896	1607	691	4445	359	2284	788	4874	1851
MIR1296	4	10	5	7	7	3	10	7	11	15
MAGEA1	8	0	1	1	0	0	0	0	0	2
CDK15	60	20	16	403	98	78	2	38	10	6
CPXM1	26	14	108	54	484	21	3130	55	352	7255
RAC2	99	783	379	246	693	10	72	80	270	89
SNORA50A	197	123	163	78	930	94	145	122	81	328
LINC02028	1	0	0	0	0	2	6	2	3	0
GGT8P	5	0	2	0	38	0	2	0	1	1
ACAA2	291	412	139	288	894	164	877	487	630	474
METTL2B	1218	414	357	644	1161	189	1523	457	848	1636
DOLPP1	70	47	46	139	190	26	196	141	119	238
CAV1	1802	2074	680	2736	1498	72	131	827	1614	136
PADI1	1	1	0	0	35	0	0	0	2	0
MIR614	2	2	5	0	1	0	0	5	3	3
LOC107984035	2	0	2	0	4	0	0	1	0	3
CHST14	198	139	182	172	441	7	280	55	658	815
CMA1	1	0	0	0	33	0	0	0	1	0
HIST1H2AI	115	85	147	371	1345	198	1597	177	947	1366
FAM173A	79	31	29	37	88	8	26	9	153	114
FYCO1	828	1191	1901	1698	5097	359	1160	1827	5633	1428
LARS2	393	383	408	654	2322	286	886	698	1727	781
MAL2	1	7	7	0	72	0	166	0	0	171
CAPG	128	325	261	2045	3548	35	493	112	2581	438
SLC4A10	0	3	1	0	4	0	0	0	18	13
FLJ46875	1	3	5	7	1	6	24	5	5	9
ARHGEF1	1322	1314	1596	763	3073	601	869	535	2806	1821
PRRT2	23	67	19	64	151	3	89	11	76	187
NECAB3	603	218	99	260	301	52	178	131	489	635
TNFAIP8	55	157	132	68	296	20	264	83	54	87
SPRED1	2812	1490	1960	2980	1474	759	8515	2810	5140	11201
DUSP9	19	12	1	64	8	15	121	4	17	174
EFR3B	1064	832	445	1354	553	164	2263	678	1142	1782
POLK	1250	666	685	820	1688	301	867	869	1282	811
AK5	49	22	3	23	78	17	7	845	43	14
C11ORF80	196	118	153	304	1535	105	358	356	490	527
LOC100507351	2	0	0	0	0	0	0	1	2	7
TAX1BP3	0	2	2	0	3	1	2	0	4	2
ISPD	102	94	65	121	550	153	543	195	155	663
ESPNL	0	1	1	0	4	0	8	0	2	45
MAK16	395	298	384	407	620	209	2349	667	1013	888
NDRG4	323	1	6	10	234	8	83	22	8	211
USP46-AS1	4	0	0	2	4	1	4	2	5	2
LOC441601	0	0	0	57	0	0	0	0	0	0
TM2D3	174	220	190	129	281	90	253	166	332	350
DNAJC22	91	31	27	122	81	39	4	55	64	17
RNASET2	375	891	552	267	1407	58	244	476	416	395
AASS	4224	991	896	1702	2060	765	6914	1805	1057	5496
LOC728392	193	36	5	6	32	4	52	11	8	107
BAZ1B	10472	2908	2273	2468	6329	889	14898	4350	4499	12226
MIR98	2	0	5	1	2	7	1	8	0	8
S100A1	1841	1807	1841	3176	3042	289	9	103	1650	103
USP12	282	243	343	646	1425	88	992	655	1169	816
FOXF2	7	59	80	428	14	57	126	78	42	130
VPS39	2639	1402	1221	1856	2754	288	1879	1453	2327	3150
TTC21A	209	262	145	293	555	157	196	304	608	360
C9ORF116	7	4	4	9	22	21	3	4	19	22
EIF2B3	390	169	135	423	826	163	695	261	348	628
CCNA2	262	157	165	308	1415	255	1637	957	611	937
WDR26	4911	3091	2553	5627	7689	1262	6544	4004	10839	8739
TESK1	418	249	260	431	547	53	275	545	485	596
ZNF662	185	62	74	20	1166	11	3	133	34	31
RRAGB	482	149	145	253	495	51	291	197	384	527
TTC14	1779	541	897	817	1689	1084	1449	1286	2074	3474
PUS3	143	43	47	112	165	17	223	216	138	242
HSPB11	309	274	117	419	871	44	443	946	448	447
SNORA71E	264	17	45	17	164	0	10	12	23	45
ULBP1	4	0	0	0	2	0	10	0	0	10
RHPN1-AS1	0	3	1	9	4	2	3	4	3	4
PKNOX2	1782	216	625	334	507	396	297	1264	1501	568
ZFP30	152	40	154	269	193	141	336	355	544	505
USH1C	5	2	4	0	0	0	134	0	0	380
DNMT3A	1049	384	589	783	1454	458	4798	366	1050	3946
CATSPER1	2	2	11	12	22	0	9	3	5	12
SNX3	628	413	394	546	1254	168	1017	985	564	534
ZDHHC23	44	10	21	31	116	12	142	58	49	217
HDAC7	1228	690	533	407	1376	132	1507	413	987	2117
PANK2	383	857	640	1164	2153	321	1716	688	2359	3457
TSFM	253	93	112	92	517	41	310	126	332	276
SARM1	291	214	169	175	191	85	103	161	726	199
KCNF1	0	0	0	0	0	0	9	0	0	21
FIP1L1	1805	1238	1055	1687	3876	749	4464	971	3527	2904
PDZD11	966	223	250	347	963	52	499	320	471	488
RAF1	635	800	852	1244	3088	545	2704	1914	2949	2205
ALDH18A1	1492	1664	1011	1839	4054	362	7653	1384	3115	17270
TM9SF2	1097	1645	2257	2121	3776	689	1923	3128	4910	2201
HTATSF1P2	12	25	24	78	34	6	23	46	0	33
NR3C1	2922	2010	2175	1629	4667	949	2334	2879	1358	1837
CELF6	98	36	27	90	96	171	33	15	208	80
HORMAD1	8	561	9	2156	41	2	325	4	337	1274
VPS54	2017	990	596	1947	2454	404	2490	1298	1667	3029
NTN5	6	7	4	0	7	0	7	8	12	11
WDR3	880	657	1098	2040	2124	480	4725	2018	2610	3325
GOT2	743	242	373	320	1050	113	508	509	380	753
ZNF607	6	28	95	279	126	165	370	417	356	518
CD48	40	318	195	104	515	23	15	58	55	26
ERAL1	657	337	291	617	932	263	1214	806	949	1028
IRX3	53	6	23	90	113	45	132	14	48	189
NME7	319	103	166	153	585	127	688	179	258	863
SNAP29	251	218	282	687	1245	203	434	803	634	549
THEM4	453	223	174	391	722	110	604	307	550	744
HOXD13	59	45	16	32	89	22	644	63	70	707
EED	404	291	191	283	594	118	763	551	461	1009
LAMP2	2559	2876	1611	2743	6161	460	1440	4443	4052	2238
TNFRSF12A	26	28	26	68	64	3	48	27	82	61
TMEM242	57	32	73	43	112	1	99	77	71	103
ACTN4	6653	7198	6585	8367	24174	1870	11111	3380	17793	11286
HCG4	4	47	6	9	209	6	11	22	201	55
ZNF350	260	120	140	328	407	35	183	262	227	311
TEX29	2	4	2	0	6	0	8	3	8	8
DBI	1468	829	538	1785	3686	253	861	1114	2365	1438
NKRF	661	363	249	401	681	70	643	429	589	912
EPN3	0	0	3	1	19	1	0	0	0	2
LIMD2	212	166	142	215	257	29	262	217	341	482
GCSAM	6	12	5	6	19	0	0	0	2	1
LOC100128079	13	2	12	3	6	2	0	1	9	2
NDFIP2	324	135	328	357	356	90	589	138	747	475
SH3GL1	519	241	388	409	884	218	722	329	981	964
C1ORF50	114	36	51	97	126	68	145	31	114	178
RPL22	1047	477	358	880	2778	261	2425	533	1046	3151
TRMT12	206	609	295	607	644	339	482	327	893	816
HDAC11	110	104	143	89	334	49	57	178	428	177
CCDC126	60	128	47	40	213	4	226	203	89	409
TMEM250	29	25	35	67	74	4	52	54	95	139
ZG16B	2	1	0	3	7	1	1	0	1	0
LINC02313	0	1	2	4	2	0	2	0	3	0
LETM1	1171	405	553	590	1646	223	1055	526	1341	1394
TRAPPC13	509	281	279	404	798	165	469	428	521	740
PHLPP1	1293	1088	1451	977	1899	462	1935	1630	3206	1901
KALRN	432	256	532	289	788	190	13774	568	359	18976
BLOC1S3	14	12	23	18	33	11	10	16	46	15
EDEM2	8	2	0	2	2	0	0	5	4	4
WDR66	35	21	10	29	69	42	108	90	48	142
XRCC6	1632	1876	2089	3117	8641	1024	23690	6936	4517	14745
XKR4	0	0	1	1	5	0	13	0	4	20
RCL1	146	94	187	234	240	71	516	371	299	659
TRIM51	0	35	27	82	168	33	4	493	460	29
CCL18	12	26	14	226	150	2	0	37	112	3
TMEM53	8	13	15	31	69	16	27	20	84	46
ORMDL3	175	137	129	134	212	83	247	241	237	193
CFAP74	11	5	0	3	1	14	4	9	1	7
CYR61	206	481	677	601	706	207	3038	2257	664	1194
LRCH3	1383	639	1146	1319	2079	1177	3064	1375	3631	4005
RNF26	118	54	108	180	303	45	411	260	411	537
RTP5	0	1	5	1	2	0	0	2	0	0
ARRDC3	1426	703	1011	444	1296	892	1488	1399	840	1880
CRADD	272	127	32	139	141	37	256	47	165	115
FMO2	13	86	110	20	4	0	4	1	53	13
KCNN3	25	32	28	102	215	14	494	43	51	861
AFG3L1P	79	42	46	70	155	11	177	31	80	270
BANK1	17	17	104	30	80	2	2	3	22	8
SCAF11	3095	1723	1260	1856	4968	1033	4987	2623	2694	6912
HIST2H3PS2	707	23	21	6	345	0	15	1	272	99
YY1AP1	3118	3007	1815	2568	5280	683	7387	2829	4672	5808
ZRANB1	620	736	565	1003	2517	554	3645	1091	1739	5114
GAL3ST2	3	0	1	0	0	0	11	2	1	25
AREG	44	210	26	54	23	40	72	203	28	45
PCNX2	1012	513	284	150	1271	179	2286	135	686	2131
TAF8	158	360	316	860	664	187	456	402	543	622
EHF	84	14	105	0	42	30	0	8	0	1
ASAP2	2906	812	838	1280	2687	657	3042	909	3905	10329
RNASEH1-AS1	5	1	0	3	8	1	3	1	8	16
ZFYVE1	330	301	242	651	1196	154	199	289	834	398
CHST5	7	1	3	4	6	0	10	2	8	16
VPS51	605	362	517	134	660	296	1298	551	890	1289
SGSM1	15	3	9	2	5	0	28	0	10	138
VDAC1	2689	1349	1204	2028	3373	556	2234	1497	1695	1479
JPX	5	4	2	3	2	0	5	2	3	11
PLA2G15	127	122	111	331	276	9	79	103	912	194
NHSL1	769	700	848	2543	2807	213	668	1427	2548	804
RINL	33	65	57	16	122	2	29	21	71	15
PCDHB9	493	8	201	18	34	101	957	630	299	949
ZNF418	419	24	209	303	402	272	495	279	488	1006
DUBR	8	13	6	13	8	4	30	8	36	22
GPRIN3	1042	472	287	355	1034	503	102	1064	120	225
TMED9	731	446	480	593	803	158	560	374	1165	785
CNTN3	7	11	37	267	617	0	144	2	21	321
ARHGAP39	321	143	151	1523	446	966	866	361	542	1257
ZNF599	25	14	22	24	75	13	38	41	42	87
C15ORF40	98	62	51	98	385	36	152	122	114	210
DTNBP1	333	507	661	1636	2647	358	751	953	2158	1219
SYMPK	3609	1919	2017	3010	3888	789	3377	1365	5081	2778
HOXD10	31	5	2	2	6	0	444	59	8	525
GPNMB	13724	14355	12954	15878	35931	16295	1531	24423	11090	1534
FAM166A	11	1	0	2	0	0	4	0	10	12
TOX4	756	690	804	947	1990	361	1079	1285	1092	1061
FANCA	1254	541	582	873	2081	293	5775	944	1304	7257
STIL	629	325	226	803	2531	271	2995	1941	1333	2901
HRH4	1	1	4	1	5	0	3	1	1	4
C17ORF100	15	11	6	6	10	0	16	8	20	20
YRDC	118	96	87	239	259	9	239	151	317	276
THUMPD2	216	147	82	154	383	91	883	130	204	871
CYP4Z1	6	0	1	0	0	1	0	3	0	2
CAMKK1	133	49	63	81	263	40	69	64	433	74
CLECL1	5	13	15	4	16	14	1	0	5	0
LOC101927391	1	1	1	0	0	0	0	5	2	3
CPXM2	929	33	7	30	71	9	5	2	33	827
KCTD7	152	188	118	138	432	19	285	102	395	326
ZNF280D	1540	824	983	773	2249	495	2662	777	1448	3437
DNM3	206	37	71	49	272	35	221	26	79	257
CHCHD10	966	390	1010	192	1275	129	208	149	698	192
MARVELD3	0	0	4	2	3	0	10	0	0	21
FRMD5	341	18	125	129	471	1	168	74	126	350
CD24	0	14	35	3	26	29	147	0	3	387
BCKDHB	319	181	226	239	945	98	767	627	649	628
CPO	25	1	5	0	10	0	1	16	20	1
SNORA24B	12	3	1	1	46	3	0	2	6	8
ZCCHC8	683	694	390	776	1558	384	1610	904	1362	1700
JAG1	570	1101	2342	1433	2903	298	951	3059	2085	5308
LRRC37A3	250	307	223	168	893	479	1190	598	422	2748
CHCHD2	328	501	763	544	2407	236	1884	516	1025	1960
SNHG9	3	1	0	1	2	1	0	0	3	1
BPIFC	0	0	0	0	23	1	0	0	0	0
ANKHD1-EIF4EBP3	7	8	12	7	11	0	19	22	5	10
HIST1H3G	137	136	156	53	138	16	1793	9	38	137
LOC101926964	6	0	5	1	0	11	33	0	0	19
LOC100507557	0	1	0	1	1	0	1	2	3	4
PPIL6	7	20	3	5	90	27	64	54	19	73
RAD52	531	172	190	282	259	117	822	234	365	861
OVOL1	2	1	0	0	17	1	0	0	2	2
BEX3	969	257	680	24	920	61	1530	459	1405	2334
DTNB	355	386	236	390	1186	121	2615	508	560	1942
C2CD5	2422	1378	1224	1334	2311	506	12578	2084	2211	9947
NTS	0	0	1	1	1	0	63	0	1	15
DNAJC14	584	229	171	397	760	121	1018	451	686	2043
SP140L	721	636	345	620	802	7	103	99	191	1096
DAPP1	26	84	77	44	268	3	5	13	29	17
CITED2	319	307	362	146	540	5	725	855	292	1185
MTMR4	1453	996	880	1198	2542	636	1961	1072	2372	2830
FIBP	1025	467	358	830	2054	298	1166	664	1889	1186
GLYCTK	107	188	200	138	568	55	242	194	408	342
ZNF304	153	123	159	146	339	98	183	157	297	283
C19ORF12	987	2470	1611	1310	3043	728	596	2558	2901	813
NEURL3	1	9	11	1	5	0	9	0	0	4
PDLIM1	44	93	132	565	600	161	719	152	182	1524
FAT4	104	142	343	123	1427	232	604	136	345	1378
SLC25A42	41	21	60	28	85	18	10	38	39	23
RNU5E-1	59	125	13	184	688	12	754	396	111	846
CASP4	1698	2094	1401	2063	3035	349	247	1901	2406	751
LTA4H	938	1450	792	1184	2975	220	6666	970	2087	2750
LINC01481	4	1	1	1	3	1	4	1	0	1
GLYR1	1302	794	891	1867	2239	449	2410	348	1847	3305
TUBB4B	1213	581	1018	1529	5467	697	2137	1567	6654	3227
ZNF468	252	185	213	417	283	161	385	165	441	508
CUL1	3051	1085	980	1832	3301	323	3418	1102	1723	3242
SKIV2L	825	651	966	2021	1660	695	2100	535	1204	3492
SNAPC3	337	233	257	487	471	276	975	368	496	1207
KLHL20	1214	429	622	376	1199	257	1613	443	999	1935
MMAB	1199	322	330	746	3590	490	1767	672	1153	2093
PGM5	60	15	18	11	119	1	58	14	24	112
BUB1B	819	358	405	595	2929	365	6570	957	1758	7308
NCOR1P1	0	0	0	0	0	0	0	0	0	100
C1ORF185	0	0	0	0	5	0	71	0	0	79
ZNF484	238	207	216	258	884	170	515	350	593	853
OR1J4	7	2	2	0	18	0	0	0	0	0
ALKBH2	133	66	42	100	289	31	394	77	241	257
CCL4L2	13	96	41	24	99	0	5	398	11	11
SBK1	6	9	5	2	27	1	213	17	15	565
SH2D2A	30	67	24	21	78	3	32	5	21	59
ZNF502	3	31	81	59	392	8	259	143	186	226
COL4A5	38	230	94	4	179	342	4382	10	2507	8196
TIMM8B	85	28	42	64	109	28	117	154	58	139
THRA	1020	134	402	461	468	313	569	635	875	550
RPS26P11	0	2	1	1	15	0	9	0	2	4
MFSD7	18	82	57	29	86	1	20	30	353	19
KCNK1	0	1	8	0	11	1	65	1	0	209
ANXA1	3590	1362	1024	6853	3276	1202	1047	813	7184	1404
ADH1A	0	4	4	0	3	0	3	0	1	0
POMP	680	722	960	1135	8222	307	1894	1360	2141	1925
TOMM7	1733	2149	1833	1458	3875	677	1239	1642	3036	2252
PAX8-AS1	0	3	2	11	1	23	121	1	31	99
PHF6	570	271	239	274	1046	121	1099	800	444	1267
FIGN	300	154	249	408	480	322	506	254	361	556
SEPT7P9	2	1	5	0	3	0	8	5	11	17
GCKR	0	3	1	1	1	5	28	0	12	18
BGN	1318	572	1124	1454	3124	759	2740	624	1504	7886
DUSP27	3	0	0	1	1	0	1	0	0	5
EHBP1	2378	1008	949	1259	2410	721	2196	1102	3018	2128
RAB4A	333	239	252	203	734	43	1216	532	596	986
PSPH	53	129	44	100	371	32	368	133	218	388
TM2D2	117	102	138	103	178	77	477	131	359	410
TNFRSF17	0	12	14	3	47	0	0	1	1	0
GEMIN5	1048	434	534	626	1141	316	1492	1014	835	1050
RAB19	2	9	18	4	20	0	0	0	2	0
CLDN23	5	3	2	1	6	0	0	2	3	1
OLFML2B	72	102	167	215	853	40	131	93	395	401
SULF2	183	243	469	213	1608	142	252	234	398	694
LINC02412	9	5	0	0	6	0	0	22	0	0
ZNF587	1112	625	668	1042	1856	846	806	816	1274	1461
GYS2	5	2	5	1	3	0	21	0	5	8
SP9	1	0	0	0	0	0	2	0	0	20
ALMS1P1	0	75	13	5	38	5	12	25	65	15
SLC35C2	798	461	283	582	669	255	402	516	1176	1121
CD74	2627	24653	12341	4848	26123	984	982	4252	2952	1969
BRMS1	368	150	213	284	868	51	307	325	341	413
GET4	238	131	211	112	568	167	444	309	399	828
ADAMTS16	114	46	212	2	18	0	24	787	3	123
TBX6	6	13	11	23	29	1	12	12	37	15
PET117	3	7	0	5	7	0	3	3	11	6
PROSER2	8	7	5	12	21	18	176	11	18	218
YIPF6	633	212	259	239	708	71	457	444	426	714
KCNJ15	1	3	34	0	19	8	3	4	5	1
RASSF8	645	581	283	689	898	45	2752	1063	635	1444
ACP6	261	160	228	49	434	64	223	287	644	432
C1QTNF7	4	3	5	2	8	22	0	5	0	3
ZNF185	87	173	71	38	459	68	129	112	124	284
LONP1	1870	838	1097	2114	2831	374	2707	1385	2468	2667
POU5F2	80	21	47	35	30	1	68	23	71	57
SAMD4B	1773	1003	837	1369	2534	476	2688	1195	1846	2251
METTL23	273	198	114	280	766	90	399	306	448	491
SLC19A2	712	889	774	840	1829	243	680	849	1646	1231
SLC37A3	1335	1013	514	664	1234	120	2092	977	1933	1711
NCS1	229	192	169	509	586	135	658	298	1501	1329
NFKB2	331	525	470	437	1266	60	628	223	613	1214
PTP4A2	1086	1156	466	1257	2392	252	2168	1666	1556	1253
TNIP1	1284	1009	1603	1277	1967	421	1726	535	1055	1355
C2ORF16	0	1	0	0	0	0	3	0	0	7
VEPH1	54	93	105	147	185	65	10	417	1647	34
FAM104A	308	280	240	342	609	124	645	512	469	784
RP1L1	12	12	11	3	22	0	23	2	18	47
TRMT13	570	225	159	436	435	148	1099	295	334	1133
PDXP	28	53	87	139	127	20	410	172	180	242
FIRRE	5	0	9	0	8	3	95	1	8	62
RAB11FIP5	233	125	99	203	198	44	222	154	415	478
SCUBE3	3	3	21	71	84	84	340	230	52	1384
AGAP5	528	279	596	700	1018	207	970	379	1042	1489
DCTN3	190	79	148	249	410	27	222	208	174	373
TEKT4P2	172	35	242	80	209	54	107	54	324	839
NDUFA12	768	313	189	463	1686	121	763	556	536	485
ZNF563	22	78	58	86	269	99	35	223	184	96
MGEA5	2722	3299	2106	3778	8739	966	7109	2982	4627	9093
NOTUM	0	0	2	22	2	0	4	19	26	67
LAMC3	80	76	243	321	404	441	356	226	7076	1196
KCNN1	6	9	0	5	17	0	70	10	31	136
ACAD11	10	4	13	0	10	11	19	4	23	20
LPCAT1	697	661	430	362	949	140	921	290	1200	1590
LTBP4	644	243	306	1000	668	507	816	231	722	1797
MIR5699	0	2	1	0	6	2	2	3	10	2
ZIC1	116	1	39	45	73	81	407	1	416	192
PXDN	260	130	353	1445	1192	539	6585	343	1102	14738
ARL4D	15	8	9	26	56	11	21	25	34	47
SRP14	1457	891	746	1237	2108	161	1973	802	1527	2830
WWC1	14	396	89	588	174	77	546	2	531	719
MAGEC1	8489	1586	19	149	0	59	12	31	8	1
KDM6B	1034	739	953	1122	2174	534	4696	1497	1982	6895
ATG4A	387	126	147	227	396	54	174	353	192	174
MIR942	4	1	3	0	5	2	3	7	1	1
NUTM2A-AS1	1	1	5	9	10	1	14	3	15	9
PMEPA1	22	26	75	51	353	13	803	20	127	1247
RCN3	91	45	44	54	338	16	118	15	89	231
SVOPL	0	1	1	0	1	4	4	0	0	0
CACNG7	0	0	0	0	0	0	26	0	0	80
BMS1	1063	761	678	1372	3854	360	3406	860	1918	3492
PRSS46P	0	5	2	0	9	0	1	0	0	4
AOC3	10	42	91	111	127	23	40	26	114	92
ADGRF5	254	126	292	1124	1017	102	251	788	490	709
NUTM2D	34	13	36	63	52	26	171	98	95	267
TXNL1	446	496	302	632	1918	277	2187	1211	1010	995
ASNS	4	1	2	1	0	2	7	0	0	8
KCNMB4	2	2	3	3	11	7	64	0	3	61
CCNI2	4	11	8	1	5	0	0	0	0	2
DCLRE1A	265	253	112	264	833	161	1070	337	492	1258
BLID	17	0	3	0	3	0	30	3	26	15
KATNA1	127	89	75	219	425	14	418	169	229	318
GRK5	231	383	181	388	757	181	1313	284	503	1361
ABCC5	1820	755	928	1975	1784	1547	2222	1383	4034	3615
RASGEF1B	515	373	240	192	1243	50	217	174	108	217
SMARCAL1	1241	591	399	718	1328	368	1185	507	1386	1696
COL19A1	1	47	13	8	13	51	952	66	82	883
PABPC4L	6	6	13	12	21	18	484	4	43	412
OR2D2	15	0	2	0	17	23	21	0	35	46
ALPL	25	23	35	25	38	1	178	41	39	334
LETMD1	529	335	294	535	1216	253	767	312	659	1036
HCFC2	576	246	171	267	920	98	665	575	460	627
MAPK11	22	27	27	34	31	11	17	4	110	185
MIR573	2	3	8	7	17	11	38	3	7	37
LOC100499484	24	8	10	19	82	1	42	41	31	44
SNORA50B	1	4	0	0	1	0	4	3	0	2
MAPK8	210	158	135	285	904	79	1256	244	397	999
EFNA2	0	1	0	15	0	17	13	3	9	50
DTX4	131	116	1892	42	336	29	74	426	193	132
SCAF4	2187	1477	932	2169	2995	680	6205	2245	2804	9865
MANSC1	134	44	54	38	64	1	26	16	284	94
LOC648987	3	3	0	8	13	4	6	8	6	1
POMT1	547	452	562	783	1888	233	793	888	1688	2147
FARP1	705	893	2669	1730	2166	696	8731	2570	10694	6651
GPX3	374	167	55	65	117	167	36	27	87	77
NBAT1	2	6	3	2	3	9	2	19	6	6
ZIC3	2	0	0	0	0	0	78	0	0	109
GLI4	174	94	100	219	189	97	196	77	263	431
PYGL	929	1773	2540	175	5708	1656	2919	980	6162	3601
FER1L5	1	4	8	3	8	0	1	1	1	5
LOC257396	1	1	1	0	0	0	1	7	4	5
UGP2	839	847	427	2276	3230	286	1406	641	815	1061
SGIP1	174	62	147	54	646	39	30	84	85	75
CYB5D1	189	37	42	41	146	4	162	88	136	182
OGG1	202	209	171	231	554	223	376	249	1124	545
THAP7-AS1	4	11	17	2	40	7	12	49	43	32
ACP5	991	586	795	280	4804	126	39	280	1332	28
PPIL2	515	514	617	879	1790	345	1091	1845	1329	1906
KLHDC8B	44	155	83	218	679	25	25	280	233	60
LONRF3	28	29	21	52	155	16	56	131	90	95
CKS2	145	122	78	325	1186	53	633	534	616	451
CNTFR	25	0	3	208	9	54	136	87	5	309
CHAF1B	386	191	146	264	803	79	618	479	918	701
DPEP1	2	3	1	2	0	0	4	0	0	4
C3	825	9730	5174	349	12869	670	349	1802	1550	1659
BCAS2	595	277	411	547	817	186	1306	1126	668	807
RSBN1	395	332	237	504	517	121	878	509	475	718
VTN	4	48	3	5	2	1	0	0	2	1
MAN2B2	1194	529	832	681	977	118	392	656	1739	536
CGB7	0	0	0	0	6	0	0	1	0	4
ZNF532	1477	1326	971	1909	3634	940	8510	1917	4231	8435
ERICH6-AS1	0	0	0	2	2	0	2	5	0	11
CCDC134	74	74	75	111	304	19	1032	284	140	905
APOLD1	39	7	21	86	141	26	48	177	49	55
LINC01547	18	1	8	10	17	0	15	11	24	28
RASL10A	2	1	0	1	2	0	0	0	5	2
HSPA13	431	309	261	286	975	119	660	375	575	977
LINC01003	1	1	1	2	1	1	3	5	2	3
WHAMM	425	345	297	339	489	173	213	498	522	379
ACVRL1	97	109	248	148	643	41	156	106	272	389
SPRY4-IT1	23	19	11	3	7	6	41	8	12	26
PBXIP1	418	446	780	623	684	118	580	372	1130	1435
UBA5	808	285	457	503	1157	222	1059	615	1498	1284
C19ORF71	16	6	10	1	8	7	10	5	26	39
FRRS1	129	209	106	224	224	48	746	175	283	638
HIST1H2BJ	276	431	576	782	3296	606	2449	379	2063	1628
TCF25	2273	1367	2105	2580	3115	614	2529	1041	2198	5223
HSF1	1260	801	974	2125	1274	492	3914	546	1943	3745
VRK2	591	330	254	426	1121	150	858	251	645	1087
B4GALT5	1338	677	880	2454	2413	215	1344	894	3326	3423
EPB41L2	3726	1686	1597	887	4634	487	7659	3285	2239	4881
CHRNA6	2	12	17	102	17	0	0	21	40	3
SHANK3	848	654	792	963	1816	750	2436	454	1433	4390
AGBL1	7	33	21	3	27	0	1	0	9	2
USH1G	0	0	0	0	1	0	0	0	0	10
COG5	8800	3182	2301	3287	5945	1213	6364	3022	3093	6550
ATP8A2	89	7	24	43	173	0	261	1	46	642
CCDC15	485	89	54	334	829	58	863	730	376	530
SF3B6	790	449	190	984	1447	172	1773	614	1211	980
CCDC130	894	245	228	292	466	156	690	157	529	527
GPR137	271	145	84	110	146	12	72	150	302	249
SNORD116-25	5	5	17	7	202	28	26	35	24	116
AMACR	12	34	24	11	24	8	25	28	20	46
MINPP1	125	213	123	164	690	23	652	315	706	977
DHRS1	116	138	223	231	666	74	56	203	533	124
PRH1-TAS2R14	2	3	0	0	0	0	1	4	1	1
CT83	0	0	0	0	0	0	88	0	0	174
SUCLG1	1186	582	409	500	2081	433	1119	794	1512	1368
ADPRH	99	48	90	44	163	33	18	70	153	48
RRP7A	258	132	263	415	435	32	1822	339	504	1344
ADAM19	75	371	438	254	1916	114	508	278	140	1120
ANAPC7	1498	819	528	1276	4857	521	4365	925	2004	3378
OBSCN-AS1	27	31	2	12	23	4	55	75	59	144
C6ORF163	38	11	26	12	140	97	45	71	30	89
TMEM251	70	222	91	398	948	114	168	349	887	175
BCL7C	264	110	115	162	314	62	185	65	401	387
TMEM229B	237	124	221	92	319	43	43	208	283	89
ZDHHC5	1148	763	625	1190	2052	326	1287	1270	1844	1377
ELF1	1068	1553	1317	1613	2028	588	1123	1679	1944	1640
SMIM17	2	1	1	5	8	3	2	3	38	2
SNRPD3	411	423	399	820	2234	340	2028	1203	1143	2150
KCTD15	504	181	402	358	605	237	514	221	1137	591
RAB3IP	256	87	59	28	235	9	516	39	34	295
SHMT1	1560	314	490	237	1279	214	490	704	563	1103
ZSCAN16	33	35	44	113	332	8	124	136	56	249
ALG1	874	432	484	1240	1615	132	987	180	1552	1713
SCHIP1	0	0	0	0	2	0	3	0	0	7
LOC100130744	125	38	134	57	183	62	154	73	105	425
PNISR	2211	1467	1646	1363	4959	744	5290	3038	2032	7350
KCNA4	1	1	2	0	1	0	285	0	0	174
TNFAIP1	258	239	236	343	500	58	279	387	701	405
ZNF525	213	162	130	340	285	136	227	269	421	418
NSDHL	396	102	175	198	596	127	315	292	374	608
LOC643339	16	7	6	15	10	0	51	31	14	44
ASPM	6868	2232	2262	3395	27348	2013	31651	16909	7669	34204
COL6A5	0	66	208	0	143	0	1	12	12	2
CCDC178	0	0	0	0	0	0	38	0	0	28
AOX1	24	79	77	28	954	18	206	14	91	156
MT1F	8	56	77	117	117	72	22	449	142	34
COPZ2	847	120	179	102	466	96	78	338	258	193
DAAM1	581	324	404	596	2619	305	685	1457	2179	678
HEXB	4029	4323	2175	4319	8965	836	2377	3597	7873	2661
TMCC1-AS1	24	6	13	15	3	10	32	10	28	59
SART1	1149	600	740	863	2780	281	2153	793	1672	2814
STK32B	586	31	11	253	69	13	1501	5	428	1098
ATP6V0D1	836	552	500	1407	1335	484	575	692	2534	1050
RHD	7	8	0	0	3	39	6	13	1	7
MIR502	0	0	3	1	10	0	0	2	1	0
OSBPL3	363	567	418	797	4845	318	816	181	855	1389
ADAMTSL3	48	16	119	79	127	78	159	13	152	435
AGAP2-AS1	157	41	44	29	206	21	28	32	429	41
LENG1	35	24	37	30	99	11	52	41	67	86
MASP1	33	4	17	5	207	15	49	6	0	99
TBC1D20	418	384	503	1451	861	356	480	354	1533	1183
TIMM17B	102	39	76	96	94	19	128	102	168	175
FAM30A	2	21	70	14	87	0	0	15	10	0
RAB29	289	430	399	645	870	70	391	563	811	1008
DYM	841	830	679	1141	2777	612	2607	1811	1901	1422
MTMR11	166	524	212	135	502	48	1039	276	384	429
SELL	101	201	121	69	237	31	9	14	52	72
TMEM191C	1	0	0	0	3	0	1	5	6	2
PDCD7	307	201	219	248	670	122	477	171	665	918
MRPL52	87	96	162	205	541	54	217	186	359	170
BIRC5	158	66	60	134	688	85	1116	360	301	902
SELENOT	278	196	280	384	537	65	234	332	544	475
AKAP12	6534	3490	2341	999	1098	262	13398	6953	3955	10532
ZBTB3	48	59	70	95	155	21	144	101	132	159
RAD50	3630	1147	1367	707	4959	1035	2195	2773	1509	2342
NDUFAF5	1014	542	359	566	1604	184	713	249	769	1877
SNORD44	71	54	39	98	451	38	326	51	180	721
PEG3	8	8	7	105	13	221	989	35	85	15
ARHGAP20	627	66	289	11	340	17	367	833	7	359
INTS2	678	451	296	569	1770	210	999	734	931	1535
PEX11B	156	108	88	137	247	46	110	126	174	126
SLC12A1	2	1	1	1	4	0	6	0	2	8
ZNF692	840	722	492	796	659	229	2018	403	919	1928
MRPL53	472	137	174	229	383	31	324	144	378	430
CSRP1	3374	962	973	987	1316	307	924	975	2537	1525
KRT14	0	1	1	0	4160	707	0	0	1	2
SNORD94	98	207	142	95	307	224	143	85	333	366
NDUFB2-AS1	11	7	7	4	8	10	15	2	6	8
ACSM5	694	10	9	9	42	18	3	12	11	2
HCN2	603	8	59	326	98	40	18	18	502	47
HIVEP3	1001	389	467	261	970	38	285	212	638	345
LILRB1	72	280	517	168	637	43	30	154	91	40
NOC2L	3079	550	636	1855	2450	341	4011	5666	1646	3502
NDP	65	1	1	0	1	0	20	0	0	15
PIEZO2	2210	63	760	1710	2606	65	5402	522	726	8974
SNORD12C	7	4	2	14	46	0	29	1	23	95
DIRC3	5	1	0	1	3	1	3	0	0	6
KIAA1522	125	38	98	147	286	20	151	223	746	237
GORASP1	164	264	351	339	875	97	206	410	721	404
EFNB2	21	23	63	58	148	22	195	143	24	207
GMDS-AS1	2	1	4	3	5	1	2	3	4	2
NACA	8436	5856	3449	8157	22350	3692	44380	6928	9049	58964
HERC5	650	772	364	1403	416	71	429	1276	1116	491
FBXO16	68	36	49	43	38	3	129	85	151	69
GPN3	331	187	155	321	1149	59	842	521	459	473
PLEC	17847	6509	11527	21751	41593	6886	18415	4126	33703	55740
ATN1	4192	2320	1731	2073	2746	607	7360	2517	5560	14709
LOC105369147	4	10	3	22	10	3	8	4	22	3
PIGV	115	104	70	245	326	126	79	120	379	112
KLHDC7B	0	14	12	12	28	0	12	1	0	6
ZNF654	408	472	368	585	1622	113	646	1032	1072	820
GAN	412	160	262	578	1193	88	820	497	498	1417
RAC3	51	14	15	223	218	41	691	119	483	723
HIST2H2AB	70	46	40	48	273	5	1304	63	203	858
B4GALT4	224	118	174	171	461	33	191	335	576	483
PCDHA12	5	0	22	1	19	25	400	120	116	551
DCAF4L2	1	4	0	1	0	0	12	0	0	5
WDR90	349	248	374	339	937	222	1174	130	1310	1730
MIR493	3	0	0	3	4	0	4	0	0	12
CAMK2B	0	3	4	20	3	0	23	2	13	81
WASL	3731	1584	1121	1647	2380	464	3331	2292	2373	2336
CABP1	2	0	2	6	10	0	0	3	5	19
ANTXR2	163	136	139	101	456	8	134	25	80	304
LCA5	102	82	87	39	230	35	392	233	139	345
DDX3X	7696	4389	4409	4049	9821	1915	12646	6329	9239	13669
ZNF595	1000	105	456	947	679	337	2370	1429	1113	3420
ARID1A	4396	4474	2387	6630	8483	2174	15797	5127	8808	13361
FAM126A	1036	1532	689	1804	3345	1694	1885	5750	2653	3767
TXLNGY	0	1	1	0	1370	0	0	0	1269	3
LOC101928100	11	4	22	0	16	0	2	8	1	2
SNRPD1	364	222	334	660	2055	313	3424	883	1014	2224
TNK1	13	20	36	16	48	2	26	0	85	43
NOTCH4	187	99	237	450	408	149	177	208	451	383
KLRC2	30	144	34	70	409	0	31	3	13	19
ZNF275	317	61	109	43	219	16	189	27	129	402
CLMP	64	35	59	15	509	14	1328	6	21	754
NOB1	486	200	292	418	618	306	913	270	1153	919
ZNF192P1	1	0	0	2	1	0	0	5	1	8
PROM2	8	6	15	13	72	36	61	6	22	67
AMMECR1L	443	712	289	845	959	183	1205	317	1626	976
PDE4C	6	4	7	9	23	18	5	10	33	49
GTF2E1	209	87	118	239	450	27	263	77	577	432
SYT3	1	0	1	0	10	0	19	0	3	15
F13B	1	0	0	0	3	0	6	0	1	17
APOB	0	7	2	0	14	0	0	0	0	0
RUNDC3A	75	1	5	2	11	0	15	15	18	29
PLPBP	246	161	183	129	240	96	464	181	454	259
PER2	97	126	200	128	615	130	920	120	276	958
NTPCR	277	96	270	274	549	29	600	176	652	703
SHC1	2755	3200	835	3007	5138	303	1812	599	6386	3204
TTF1	221	203	221	445	859	271	1258	464	545	1999
ZBTB18	316	165	195	55	262	48	844	202	297	1362
PPFIA1	2780	1242	1058	2068	4197	1322	4335	5437	7460	4724
MBLAC1	5	1	9	4	7	2	10	1	9	41
POLR3E	894	452	608	1238	1363	359	1770	479	1513	2512
IL1RL1	8	3	0	1	38	0	2	4	5	13
SSUH2	0	12	31	0	104	0	173	9	10	352
M6PR	998	1116	987	1366	3554	483	1080	1598	3732	1812
LOC102724265	0	1	0	0	11	0	0	0	0	0
JUP	398	73	236	547	930	360	414	357	192	634
RPL35	3121	1398	1782	3873	8814	1276	4939	2276	6525	7574
LNX2	260	136	478	299	1618	49	249	241	706	277
RAB40C	72	37	64	66	127	0	131	38	159	247
CDC42SE2	117	241	191	158	414	51	132	198	133	117
LRP4	176	362	504	316	415	65	2122	1534	1738	2250
ZNF330	816	494	482	659	1801	323	1052	1282	1635	838
FLJ42393	21	19	20	35	40	4	72	31	88	80
NAA38	118	38	53	42	138	31	163	29	102	265
NDST1	2525	889	1675	2580	5260	549	2096	1626	2303	3181
KMO	30	123	79	77	170	7	17	64	19	14
MEP1B	1	2	0	0	3	0	11	0	1	6
SEPT7-AS1	1	1	0	0	0	0	2	7	0	0
WNT6	3	1	2	1	5	11	3	0	1	4
MAN2A1	590	756	495	681	2050	236	1177	571	1652	948
RNF41	307	322	212	498	561	126	936	329	576	1832
ACTG1P20	30	13	19	32	58	3	63	14	28	107
ARSG	22	330	75	451	331	28	412	144	592	876
ZNF555	179	130	147	179	453	118	454	290	339	742
PPIEL	56	1	10	1	36	13	29	17	75	30
PRR14	346	193	179	551	545	187	338	136	474	606
TAF1	5868	1646	2099	2089	6169	1453	4910	2768	4303	8275
CAMSAP2	3994	1369	1166	2417	6639	852	5741	5012	4295	7355
TP53BP2	1676	1247	1106	1540	2689	517	7013	1740	2728	6827
TIGD6	64	39	56	65	93	41	72	54	43	83
TIGD1	65	63	26	81	235	3	302	28	107	615
CENPJ	672	295	620	736	1553	629	4429	564	1353	4480
VAMP8	383	244	274	304	827	124	50	312	658	59
CEP85	314	156	165	696	968	71	1092	448	728	1382
MUC15	84	2	1	3	17	1	1	0	0	0
C4ORF33	83	49	70	87	215	5	108	131	151	95
PGLS	627	269	221	502	487	96	296	226	667	281
CRISPLD2	77	223	147	120	829	18	83	84	190	392
PDE3A	21	228	199	440	352	831	95	114	266	413
NAT16	10	0	2	0	0	0	2	0	1	34
FER1L4	33	94	83	24	157	0	35	19	93	302
SPATA22	2	0	3	2	18	0	0	4	1	4
CARD19	218	83	88	207	445	41	51	74	329	124
IL1RAPL2	0	0	0	0	3	0	22	0	0	12
JADE2	814	942	817	509	967	119	108	551	1132	209
LIPM	0	0	0	0	11	0	0	0	0	0
MT1G	23	12	137	142	25	24	11	815	37	61
TAB1	135	90	184	166	260	40	330	261	309	230
COL3A1	3031	2979	15745	6033	91775	9018	27102	4254	20080	91033
CCDC28B	20	10	21	20	43	0	14	39	39	26
ZNF613	65	47	75	203	104	69	125	190	123	161
VENTX	12	4	11	1	17	0	2	4	1	10
DDX12P	305	77	273	274	441	89	886	226	843	1621
TMEM44-AS1	3	0	1	0	2	1	0	2	1	4
TMEM143	36	11	30	31	62	23	24	9	80	35
SHPRH	748	471	701	965	2033	520	1614	1116	895	2100
CSNK1A1L	7	0	0	2	2	0	8	3	1	1
PAX7	4	0	3	0	0	0	19	0	3	0
BNIP3L	348	530	699	559	1301	291	2996	703	2389	1044
TCTN1	1501	817	423	607	2102	530	1288	994	1716	1358
LINC00634	0	0	0	1	4	0	24	1	2	73
ATP8B3	52	51	46	191	185	38	30	48	252	40
SNORD42A	2	4	1	2	11	16	17	3	6	14
PEMT	103	56	78	118	237	68	174	65	369	201
LINC02175	0	1	0	4	9	1	1	2	1	13
MRPS11	375	287	272	415	1142	50	503	316	549	637
SNORD116-8	306	688	654	482	6151	564	687	1128	1158	4409
ZNF764	96	58	85	76	114	38	151	58	95	321
DDI2	498	764	258	757	810	184	655	616	1154	803
HGS	1226	594	597	1009	2005	253	3012	900	1491	3671
LOC105371795	10	1	1	1	6	0	2	4	2	0
PTPN18	255	235	138	164	341	56	224	128	648	388
GFI1	61	170	84	35	96	3	9	44	19	17
CHMP1B2P	14	8	4	0	0	0	0	0	18	0
CFL2	968	747	1005	899	2670	230	2065	2566	1556	1610
PKMYT1	69	48	50	123	308	25	250	50	308	306
MIR554	8	2	2	4	20	0	10	13	5	32
LOC100507156	1	1	6	0	1	0	1	1	5	5
ZFYVE28	81	142	126	140	208	24	48	103	198	108
MZF1-AS1	19	8	0	4	10	0	9	3	6	6
LYN	147	396	592	406	1315	161	344	363	351	620
MRPS14	84	43	43	53	153	21	161	62	118	205
LEAP2	17	2	2	2	13	0	10	14	1	27
TARSL2	763	316	172	367	772	120	413	40	547	731
KCNH7	0	0	0	0	0	0	1	0	0	20
DLD	5287	1116	1177	1608	5484	287	3145	1305	1594	2651
SLC39A14	272	137	196	111	310	65	632	290	765	374
HSD17B14	269	227	210	262	371	83	23	109	607	72
RELN	98	31	95	5	234	32	10597	25	90	1861
CAMTA2	1497	752	712	938	1578	207	987	768	1729	1226
PABPC5	186	31	87	8	13	52	174	143	121	171
PODN	13	113	178	58	593	88	55	32	163	180
FAM177A1	226	649	172	433	913	288	421	371	1633	366
RASA4B	13	8	35	12	64	0	48	8	13	113
PDE12	324	255	277	444	1682	146	414	597	1027	400
ZNF780B	1271	527	541	528	1639	368	1327	589	1040	2282
MED30	36	32	32	33	124	26	315	31	66	259
WDR7	800	896	777	1119	3244	458	1536	1387	1845	1857
ANKRD12	1241	1562	935	2213	5544	901	4305	3065	2437	2793
DAGLA	400	90	152	80	372	59	3012	532	625	4846
PPP1R3F	104	54	79	29	94	11	45	44	90	164
RGMA	59	21	56	6	112	3	212	2	8	346
TMEM196	6	0	0	0	0	0	3	0	0	8
ALPK2	1	23	38	7	197	16	14	12	9	71
ACKR1	4	5	13	3	68	2	1	0	5	20
RETREG1	245	77	50	35	260	6	216	85	487	853
CCNY	448	405	344	758	1221	190	1475	699	1317	1174
MTIF3	542	325	445	583	2513	240	685	550	572	716
GALNT3	810	340	234	404	1843	73	535	1180	1397	729
ZC3H10	81	52	78	106	216	17	165	79	110	362
EPRS	6723	2846	2408	5301	8283	833	16160	4523	6664	13263
SMAGP	6	8	5	7	32	1	24	6	14	37
LOC101929243	1	6	1	1	0	2	1	1	3	2
SNPH	18	5	46	9	129	1	17	105	430	62
PDS5B	1109	823	1269	1348	9825	874	7072	2078	2272	6321
PMS2P1	2679	695	658	681	2118	382	2050	879	1349	3028
CXCL12	65	432	278	168	1908	180	97	122	397	448
TMEM204	65	10	24	105	86	18	30	16	62	142
MYBPHL	31	2	3	6	8	2	5	3	3	17
RAB22A	1090	450	193	669	1014	182	842	892	1243	992
GLUD1	2483	2051	1267	2641	9131	683	5408	1465	5545	5261
MPHOSPH10	1012	458	319	573	1422	321	1901	679	872	2209
PTPN20	0	7	7	5	31	1	2269	1	867	1786
ANKRD36B	1589	1148	748	598	4661	468	546	703	2607	1590
MAPK6	693	447	380	840	1937	182	1894	1080	1476	1794
TATDN2	623	541	706	573	1512	274	1200	1066	1829	1058
RNF38	550	648	524	1228	1528	156	1017	1446	932	1260
KATNBL1	222	107	135	116	285	73	237	150	344	351
ZBTB17	377	191	256	369	515	64	699	423	383	914
RAB33B	92	57	63	74	168	39	156	91	195	219
CEBPG	79	57	36	89	267	21	374	168	133	219
USF3	1512	1044	991	2489	2641	672	2652	6555	2523	2989
YIPF3	321	655	542	1264	1278	267	745	457	874	835
MAP1LC3C	1	1	4	0	1	8	3	0	0	2
C19ORF25	23	16	33	21	13	10	30	19	30	58
SNORD114-31	0	0	0	0	1	0	5	0	0	6
SDHAP1	493	121	262	275	737	98	522	180	568	1843
ZNF594	1243	391	501	432	1941	275	1189	621	1245	3705
HNRNPUL2	68	67	82	86	135	23	310	110	177	203
DGUOK-AS1	3	3	2	0	17	0	8	0	0	10
DTX2	548	242	417	296	309	124	283	223	467	278
STARD7-AS1	9	6	10	8	35	9	27	3	24	44
MESD	563	540	575	672	1918	168	891	523	1283	1562
GLCE	704	429	417	241	751	155	620	321	1105	751
CCND2-AS1	0	0	1	0	0	0	32	0	0	42
MSI1	2	8	8	48	3	14	842	1	110	1174
TUBD1	100	118	65	118	233	66	384	221	199	471
MTO1	287	306	341	397	1048	204	882	732	1407	781
ALDH5A1	94	202	235	81	347	263	457	456	857	1113
LOC100288069	2	1	0	3	10	2	6	3	1	0
RPL10A	2007	1343	1874	3542	6843	1740	7993	1334	5579	9702
DOC2A	23	16	4	6	16	12	99	4	53	213
MOB1A	757	802	424	893	2192	196	1012	735	1321	1060
TTC19	2790	902	836	1578	4085	789	2271	2673	2680	2578
ATG16L1	372	445	293	516	1207	242	1033	209	835	1359
DHFR2	70	65	62	115	103	6	64	119	222	133
TAS2R9	1	0	7	1	2	0	4	0	0	14
MIR758	0	0	0	0	1	0	1	0	0	14
PKIB	58	11	9	0	102	1	7	2	9	12
RNF44	227	144	178	174	170	39	470	63	277	436
LDOC1	254	5	14	15	24	1	251	6	1	400
LOC102723665	1	1	0	0	0	0	4	0	0	5
C9ORF66	0	4	8	1	2	0	0	0	0	2
MIS12	188	77	71	97	330	68	217	74	164	348
PRPS2	242	299	232	184	400	59	350	270	430	329
KIAA1671	369	250	225	225	1120	107	414	713	731	1075
PLOD3	18785	3277	2842	3647	5126	1451	5181	1856	7149	10505
ZNF728	5	4	43	356	4	2	3	11	0	232
MIR650	0	34	648	289	312	1	0	33	0	4
PAX3	1115	1460	1706	3330	3939	4951	40	4798	3023	50
ASPHD1	30	12	16	45	11	0	28	10	69	53
TBC1D17	710	394	430	572	663	226	547	275	899	700
EEF2	14573	7486	10497	10303	19997	3917	41515	5651	19425	52793
ETFBKMT	22	26	23	26	41	5	50	30	63	41
COG1	1368	734	773	822	2539	319	927	1472	1530	2173
MAGEH1	290	92	179	76	212	51	199	207	173	225
MIR589	4	2	4	2	11	0	20	7	7	31
USE1	192	80	143	166	282	46	91	206	274	171
SEMA3B	44	132	379	65	337	48	363	22	4245	588
PIGT	5453	2767	1811	3390	3457	913	1546	4314	5329	3232
SLC25A1	191	230	442	427	913	92	356	620	1397	710
ALX1	436	183	147	172	191	162	598	2	495	191
MSTO2P	165	72	60	78	198	72	283	77	201	284
SPIN4	84	14	27	31	77	17	112	69	58	155
RPP30	172	138	103	243	728	39	763	281	382	408
MCTP2	10	119	137	48	552	1	371	24	30	750
UHRF1BP1L	1048	568	382	414	1339	222	2783	1416	982	1413
ELAC2	1912	653	1347	1455	4039	530	3086	1044	2669	3533
RNF126	173	94	161	203	250	15	220	113	352	167
MTERF3	441	293	227	642	665	194	1665	469	575	1537
IRAIN	1	3	0	0	0	1	5	0	0	2
AIFM3	34	42	15	15	30	0	8	54	106	22
AKR7L	44	8	13	23	83	20	43	16	29	93
ATIC	1759	968	708	2562	4806	1403	5717	897	3177	4457
TM9SF4	2287	1287	779	1796	2547	190	1485	1192	2995	3589
CSAG4	0	0	0	20	17	0	45	28	0	0
MAP6D1	9	2	3	7	45	26	5	32	176	14
GSR	988	788	958	2006	2792	251	2425	1231	1649	2029
C5ORF56	33	52	69	35	97	1	19	20	13	33
SNORA41	57	85	27	34	378	42	89	34	73	346
MRPS25	557	448	714	667	2362	210	731	673	2934	941
TAF1D	859	571	354	649	1490	328	3305	961	1162	2520
NNT-AS1	21	5	5	16	27	5	23	76	25	12
PLEKHG2	245	582	404	475	1666	178	1890	695	1240	2424
TMEM215	0	4	6	1	15	6	9	33	13	8
ANKDD1B	2	37	17	11	46	12	2	14	12	22
HOXC4	79	111	66	105	104	9	96	85	245	205
KLF12	302	152	184	393	528	106	510	432	639	643
ABCG1	482	589	368	145	350	24	48	150	148	137
BAZ2A	5853	3726	2483	4277	11949	1366	9803	3607	5433	16412
NRXN1	2	1	1	4	14	9	2214	2	0	378
MPPED2	784	45	448	36	816	31	1815	728	873	2217
PDZRN3	247	50	238	958	2589	269	1259	1893	63	1433
TK1	83	32	47	88	382	68	374	134	300	444
KIAA0513	178	361	189	384	362	43	103	154	179	244
SCAMP1	596	314	297	591	754	213	814	606	990	454
ST3GAL4	6046	2052	2257	3231	5738	754	2668	6800	7896	1908
FAM50A	3564	896	1237	1524	3959	304	1408	1317	2241	2424
YTHDF2	848	578	552	1185	2113	310	3602	826	1658	3218
RPS6KL1	34	33	59	74	288	28	20	2	341	44
FRG2C	1	0	1	1	0	0	3	0	2	16
ZNF440	341	479	314	891	1928	413	221	630	1263	836
LHFPL3-AS1	516	150	50	7	158	6	1	6	10	2
FAT2	354	18	98	97	570	225	1	13	171	2
TBX5	14	148	68	28	21	0	1711	0	20	1478
ARL4C	67	186	121	56	201	16	86	64	88	67
GAS2L1	88	93	146	95	216	4	39	181	452	39
YOD1	305	239	188	43	537	133	627	325	223	1099
C5ORF30	104	57	110	183	242	48	158	162	493	201
SDC4	321	190	136	163	485	44	279	212	338	549
LCLAT1	293	140	66	254	697	70	838	265	459	1004
ITPA	253	350	300	775	756	139	547	132	1360	1510
PURB	86	151	210	184	473	80	633	387	372	407
NDUFB8	324	263	327	61	1095	57	774	263	636	943
INPP1	549	209	97	196	792	355	176	303	426	315
CLN8	177	129	193	187	693	124	457	290	495	442
ABAT	108	76	59	28	202	198	278	17	81	587
MIA3	2616	1520	1346	1736	3836	811	5216	2393	3404	5951
FAM212A	12	4	11	3	132	0	43	12	194	68
PYCR1	424	267	231	1000	883	318	2897	474	825	3268
EXD1	1	0	0	0	1	0	4	4	4	6
CACNA1C	84	72	216	204	884	160	1799	100	252	2859
HTR1F	13	0	3	26	56	14	1	8	2	22
TMEM145	106	96	28	9	56	10	109	179	109	126
SYNJ2BP	48	48	38	73	109	38	135	93	114	43
APOA1	0	0	0	0	2	0	6	0	1	12
POLE4	118	123	46	89	346	18	205	89	151	246
MRPS2	159	95	116	212	301	114	366	128	360	376
LOC105369980	11	0	0	0	0	0	1	0	0	0
DPM2	63	32	69	103	155	40	85	104	152	174
CLGN	20	2	9	0	74	0	553	0	7	468
NRXN2	235	26	186	21	110	285	2964	188	56	2961
PLEKHJ1	77	33	28	34	93	1	32	18	109	49
GMEB2	170	85	113	108	137	85	351	123	292	408
TIMM50	779	821	439	1277	2193	313	1124	1421	5285	922
GAREM1	196	218	382	17	110	24	1314	31	1344	853
FAM102A	490	711	448	594	879	127	529	823	1081	1167
C9ORF16	13	14	14	27	54	8	49	20	77	61
LOC283387	0	1	0	0	0	0	7	0	0	5
LOC100289561	197	73	98	104	53	158	179	87	117	135
SNORA73A	58311	53709	23804	64931	141074	14929	143035	11702	104927	249359
SUMO3	323	256	251	299	644	81	759	262	830	940
TIMP1	2112	1252	1549	743	1282	250	570	614	1072	1220
SEZ6	0	0	0	0	0	21	0	3	0	1
TVP23C	65	25	30	24	74	4	83	58	61	91
KIAA1958	35	24	31	115	227	12	394	162	168	526
SLC38A3	9	2	0	5	24	0	44	8	2	63
PLCE1-AS1	2	50	0	1	3	0	0	5	16	0
RSPH3	143	95	116	133	310	55	234	114	161	239
SHISA4	330	167	193	158	276	33	222	550	711	526
KLHL4	2	4	9	3	9	0	22	0	7	49
E2F3	162	227	209	732	1424	371	1535	947	769	2012
FBXL22	0	1	2	1	0	0	4	0	1	4
SLC6A14	0	1	6	0	14	15	2	0	0	1
TUBE1	161	124	107	104	177	54	589	322	93	477
CPA4	8	5	3	204	57	24	0	9	1	18
USP38	781	439	517	585	1777	204	726	713	1051	996
LOC100287497	49	29	23	66	116	16	130	65	73	175
ALDH8A1	21	3	5	1	15	0	14	18	6	8
MLYCD	386	154	221	210	455	105	215	241	230	752
LOC150051	0	1	0	0	7	0	12	1	3	34
TRIM39	41	59	75	153	185	34	119	92	100	176
SLC38A7	241	153	177	345	259	95	203	186	258	440
VPS26B	560	187	243	351	507	48	584	480	945	764
UBL5	906	439	504	612	1446	163	824	615	1226	861
RPS9	2684	1979	2619	1926	5179	1184	9871	1611	4997	8886
WFDC3	13	1	1	9	5	0	1	0	8	7
CHD2	4362	3300	3319	3875	9614	2722	7806	4567	4293	12829
NDUFAF4P1	1	6	0	0	4	2	1	1	0	9
HK1	4554	2712	3402	5130	13211	825	4052	1153	7066	5862
ADAT2	149	113	147	392	313	159	196	201	436	254
BCLAF3	566	248	239	273	784	108	611	1167	507	1070
TAF5L	345	208	232	317	571	61	622	439	601	664
ANGPTL6	18	5	2	9	9	0	0	52	6	7
MPPED1	0	0	0	0	0	0	38	0	0	68
GJA4	14	16	20	50	50	12	17	27	43	53
PLXNB2	2527	3037	4320	5762	5213	1029	4233	876	6619	8983
KIAA0355	1023	620	866	993	1474	443	819	840	2210	1059
LINC01569	4	1	2	0	5	0	4	0	3	3
BORCS6	39	27	61	34	85	4	21	19	55	39
HOXB-AS3	9	4	0	0	0	0	6	3	0	2
C9ORF64	85	86	94	116	617	114	133	86	318	187
AK8	25	4	5	9	60	0	25	22	64	73
RNA5S9	115	154	135	109	1352	23	241	96	340	1159
PRKDC	11651	9267	5743	25416	30759	6422	118136	16089	18142	69551
SFR1	18	20	15	29	118	0	123	42	31	96
TRIT1	455	199	163	405	627	190	1016	312	316	834
KRT222	2	1	4	0	14	0	4	2	1	0
CCT4	2716	1383	1007	2366	3443	1052	6982	1419	3567	4449
PINLYP	1	4	6	5	21	12	2	3	9	7
ELMO3	61	13	46	29	76	57	61	21	149	279
SMC3	1593	1594	1069	2147	8853	1231	16293	3878	4970	11855
SPATA45	2	2	0	1	5	0	0	0	1	9
MRPS36	142	85	87	129	270	51	128	167	223	86
RAI14	1566	1285	1761	1132	2610	435	2873	6957	3125	2791
PCNX1	3441	3556	2618	3458	8474	1627	5581	2862	7435	5501
HABP2	13	0	14	0	4	0	13	0	0	0
FRG1-DT	0	0	0	0	1	0	4	0	2	4
ZFP57	0	72	0	2	0	0	5	21	1	11
LIMS2	28	53	27	345	211	135	56	46	515	199
LINC01597	0	0	1	0	1	0	90	3	0	56
GANC	1101	1061	1642	1494	1936	752	580	438	2449	439
RHOF	7	92	53	35	128	14	77	3	35	51
UBE2H	1594	796	652	1101	964	137	1267	777	828	1210
HRASLS2	2	1	0	0	7	0	0	1	0	0
BMS1P2	58	38	61	38	76	17	176	51	147	118
SNORD101	7	8	4	37	31	37	82	14	22	69
USP32	2427	3168	1301	2839	5527	530	2099	4046	5484	3878
VN1R1	77	11	19	31	6	8	22	34	28	39
ZFP64	603	315	265	646	633	138	1138	386	1207	2224
ERGIC3	5095	2178	1490	3347	4999	640	3342	2559	5050	5742
FAM71A	1	0	0	0	1	0	0	6	0	4
MT2A	5078	3585	1769	3418	2510	165	179	2619	1631	389
SULF1	115	731	2563	709	2821	415	1236	1348	956	2904
CNPY4	154	114	80	102	265	12	234	87	309	353
PPARGC1B	803	169	304	337	446	220	81	182	181	124
HADHA	4774	2455	2178	4463	10991	1029	10359	2550	6692	6684
ANKRD44	1090	2179	1827	2310	5869	1027	1405	3135	2306	1542
LOC100133050	1	2	2	0	0	0	4	0	3	7
PAIP2	969	526	427	834	1206	125	1197	1431	524	929
ME2	591	859	433	596	3147	187	1835	878	1543	1054
RAD51-AS1	2	5	2	2	7	1	7	1	6	8
PLD1	657	390	516	876	2652	199	193	706	2595	418
RFX8	12	4	35	3	130	0	3	23	22	29
KU-MEL-3	4	3	0	6	0	3	0	3	22	0
RPARP-AS1	4	15	11	10	26	2	37	3	25	48
TCAP	4	0	4	1	0	1	9	1	3	14
LOC644794	16	12	19	15	27	11	44	15	20	20
LOC101927021	8	3	2	3	17	6	4	12	4	8
CD1E	13	1	2	0	13	25	0	0	4	0
TXLNG	663	247	237	218	248	59	552	1345	289	707
ZNF519	29	27	58	69	453	37	953	125	131	1214
PCSK2	0	27	0	247	10	1	377	420	93	3556
RPSA	3207	4010	3926	4094	34789	2023	22623	3680	18157	13035
KRT8	21	30	202	9	275	41	36	12	67	513
ATXN2L	3066	2752	2467	4976	5956	1215	9968	2180	6433	12295
PAFAH2	248	142	82	267	154	29	154	96	237	196
C12ORF73	49	22	21	42	94	14	113	59	70	74
SLF2	595	918	735	1268	3585	312	2146	1044	2671	3408
HP09053	4	1	0	0	2	16	8	8	0	4
CEP250	1240	693	615	1133	2920	208	2047	1456	2785	5022
KIAA1456	72	9	75	74	117	85	145	30	246	192
TSGA10IP	0	2	1	0	2	0	0	2	4	1
SLC16A5	138	102	40	177	231	47	6	36	480	36
C15ORF62	0	1	0	1	5	0	5	10	3	3
BROX	1258	1183	729	1627	2185	422	2228	1920	2320	2018
DOK3	11	67	120	23	112	4	53	30	39	59
POLR2L	561	220	134	286	777	85	137	114	911	353
PHACTR2	165	337	261	162	1164	118	1119	890	212	1201
LOC100507516	3	106	8	0	7	2	83	34	14	17
SLC36A4	217	141	108	295	751	106	688	56	502	566
KMT2E	23564	6428	4944	10201	11931	3081	12768	8557	10582	7889
GK3P	1	1	1	0	6	1	3	0	7	1
KLHL15	358	163	179	175	381	71	680	406	322	826
SNORD18C	6	8	1	2	15	0	26	5	9	22
ZNF625-ZNF20	4	4	7	4	21	0	10	8	10	13
HIST1H2BK	442	610	860	1789	4312	644	5229	1073	2919	5720
TRIM41	1070	308	408	656	953	211	798	667	1069	942
DLX6	10	1	1	3	9	1	473	56	0	422
TRA2A	788	703	427	699	1147	16	3106	59	873	3142
LAT2	19	50	71	19	113	1	12	26	18	36
BCL2L1	428	439	309	289	479	26	138	499	883	343
ELAVL1	565	347	407	557	1024	129	1272	494	1032	1068
ZNF576	60	28	59	34	89	81	40	44	89	60
ACTR8	213	393	336	404	1358	125	710	738	1007	787
CYP4F30P	0	0	0	0	0	0	4	0	0	7
CHST7	9	8	30	6	20	1	5	3	1	13
GLMN	380	312	153	470	541	125	909	876	584	1047
ATP6V1D	376	485	376	1034	1430	289	850	1194	1671	658
C8ORF46	85	122	65	286	174	50	18	179	38	26
TUT1	260	113	142	171	241	67	375	199	271	479
POLR2E	806	366	548	889	1579	195	857	611	1276	742
KIF2C	416	144	178	529	2344	273	3304	507	633	2085
ZC3H7A	1515	1255	1003	2452	4197	975	3042	994	1725	4229
LRWD1	580	168	286	348	607	93	732	213	443	788
HFE	175	108	96	30	232	11	175	12	482	229
SRSF2	361	214	290	253	771	196	1094	242	709	1139
EGR1	2523	388	642	1552	728	1095	4810	16931	1695	3956
WDR60	1771	585	562	762	1794	323	1398	285	885	2012
SLC24A1	1984	1020	714	1160	2239	576	1361	1113	2373	1985
LINC02012	9	1	2	2	0	0	0	1	1	4
PRMT9	381	211	240	257	980	148	542	530	570	939
VSIG1	0	2	3	3	8	0	18	5	2	61
RAE1	509	282	208	380	791	279	1132	593	746	1363
TRIM2	1253	1196	961	92	5690	1048	2484	1367	3087	2668
CYP2C9	0	1	1	0	2	0	0	0	0	8
KDSR	214	470	156	508	766	68	346	310	996	383
KMT2A	6975	4130	3405	5046	9632	1645	15867	9949	7732	15242
GPR1	1	6	1	0	16	8	2	0	4	8
ELOVL4	2	11	16	4	103	14	191	51	14	150
SPON1	37	54	113	19	485	180	2205	19	48	3962
NFE2L3	217	356	260	55	763	75	891	58	312	668
ADCY8	0	0	2	0	0	0	1123	0	1	912
IGFBP2	1235	139	100	372	212	50	393	53	145	1042
PIK3R2	703	399	468	651	1245	242	828	740	1599	1429
ING4	307	167	245	246	262	95	322	149	300	724
OCIAD1	869	518	535	708	1361	227	2118	619	1200	1701
ACO2	2594	1388	2781	2616	4986	584	6745	3856	3714	7914
PCDHGA11	795	23	155	115	72	23	60	122	263	515
ACAP3	1487	215	424	565	1023	206	576	2609	783	1255
MTTP	12	11	7	5	14	47	12	19	6	1
ASL	894	375	565	569	2092	169	1049	414	1291	1068
PPARGC1A	5403	797	1351	330	2296	244	190	64	19	105
HSPD1	7101	2416	1838	4050	13827	2467	19654	2317	6063	15809
JAK2	422	598	977	491	2243	216	268	2045	410	520
TENM1	70	11	23	10	184	44	275	6	11	970
SNORD29	16	14	4	18	86	5	180	12	28	151
SCARNA9	615	426	251	321	870	353	430	1569	708	844
TOP1MT	617	329	279	832	669	216	1339	170	1048	1559
PTPN2	448	548	440	738	1972	322	1938	1417	1423	1277
STAC3	53	95	83	69	196	15	147	45	63	218
MRPS9	393	159	153	227	763	77	892	298	485	779
CASTOR1	37	22	18	12	26	16	9	22	47	48
RAB1B	899	554	428	791	1786	215	904	745	1031	929
THBD	49	71	90	298	638	85	39	130	1032	141
IRF2BP1	103	78	128	82	288	49	272	79	326	317
RTF1	1225	847	770	927	2564	107	3220	1136	2209	3522
FOXA1	4	8	21	1	4	1	17	1	6	84
PCF11-AS1	5	4	5	3	1	4	10	17	7	3
MIR506	3	0	1	1	3	0	0	0	5	0
RHOT1	1133	452	515	893	1291	450	1830	1809	1467	1026
TTLL1	105	138	99	359	471	90	793	472	514	1187
ALG2	525	584	518	767	2849	587	867	2079	1292	1644
ASPN	16	35	37	74	642	8	125	57	36	205
CECR2	16	72	79	30	53	207	1104	4	38	1939
UBE2R2	627	653	420	1037	1755	244	1840	912	1115	1950
OOEP	0	1	0	0	0	0	0	0	27	0
C2CD4C	0	1	0	1	1	0	4	0	3	4
DARS2	1376	762	538	1402	2264	222	2340	867	2722	2171
GOLGA1	533	284	362	647	1510	254	538	602	1080	1127
MAL	4	42	3	262	653	61	9	0	159	7
ZFP82	109	84	105	160	300	75	458	256	305	596
C16ORF74	34	4	4	7	14	13	13	7	13	106
ZHX3	1299	268	376	833	789	260	356	946	670	868
CSMD2	37	40	82	12	231	8	140	41	39	284
LMCD1-AS1	5	0	1	0	0	1	2	1	1	1
GJA3	69	114	4	48	144	2	190	93	10	168
EPS15L1	1221	764	728	1152	1776	374	1421	1164	1410	1414
NBPF19	570	661	759	1243	3462	467	3252	828	1065	4148
MOB1B	350	251	150	422	1360	128	629	392	783	468
EFCAB12	2	3	5	0	2	0	13	0	10	30
LINC00346	7	3	7	5	22	0	2	15	19	11
FBLN5	38	328	79	149	891	102	125	78	89	446
SNORD116-27	8	23	18	15	36	7	26	21	37	31
MTMR8	6	40	111	20	90	13	130	179	8	251
RGS20	573	257	149	541	375	210	102	379	252	60
ABCG4	2	1	2	6	15	0	20	2	8	28
MAGEB1	0	0	0	0	0	1	0	19	0	0
SLC16A11	2	2	2	0	0	0	1	0	0	4
TMEM207	0	0	0	0	0	0	0	14	0	0
POLR3GL	686	363	330	491	1124	161	241	643	800	404
MATN1	4	1	0	4	7	0	33	7	3	19
UPP1	154	284	230	469	2761	21	133	1435	635	143
CERK	287	402	640	717	1950	191	3479	1246	1988	4250
EIPR1	212	135	96	292	309	68	184	154	409	420
CRYL1	261	188	746	704	1272	237	177	298	1459	340
ABHD13	110	108	189	176	195	61	174	293	276	233
PPIC	249	27	33	32	157	23	106	45	47	228
PRPF18	227	188	142	318	610	177	732	250	541	576
POLDIP2	2288	882	951	1282	2133	414	1514	1265	2753	1610
MCM3AP	3077	1537	1284	1987	6099	885	2821	1634	5616	4356
SMDT1	84	51	72	85	454	14	838	190	106	764
SPG7	1946	788	1067	1402	2967	386	2237	949	1924	4703
NKAIN2	1	0	0	2	0	0	350	2	0	19
UROC1	0	2	0	0	0	0	8	0	2	6
CD247	17	262	122	69	261	1	25	7	39	28
NCAPH	234	118	108	236	1559	142	1960	283	525	1563
CEP164	1170	306	389	983	1409	183	1754	1185	1452	1879
ADGRL1	347	357	445	512	686	106	2043	1043	975	2134
RSPH4A	12	16	4	3	72	21	74	67	9	45
LAMP1	736	709	1057	2366	1938	587	1016	912	3322	1616
IFIT2	229	468	376	1255	728	24	23	205	195	105
TMEM71	21	34	29	16	168	41	11	24	36	26
LINC01235	8	1	0	8	0	0	0	0	2	14
GPX8	233	360	334	351	577	152	771	343	562	499
ENTPD5	249	187	177	384	674	85	393	340	719	354
QPRT	169	109	128	518	307	37	69	105	251	399
CHRNA3	0	0	0	4	3	0	12	0	0	9
CTBP2	418	502	436	1097	1743	291	4252	386	1788	7098
PRMT2	1858	1205	807	1440	3916	646	733	719	2899	1403
KRT15	5	10	4	1	216	14	0	1	0	0
NPIPB11	957	486	609	1669	1003	721	859	585	1414	1350
CSNK1D	3349	2142	1734	2378	5916	610	4354	2535	3729	8011
OSR1	0	2	6	2	15	20	4	0	1	38
C11ORF58	1620	1019	760	1259	2410	391	2721	1039	2364	2216
MORN2	166	81	28	94	237	38	393	154	145	339
MROH8	16	30	29	34	433	5	39	88	145	68
ATP1A1-AS1	9	60	9	5	19	23	68	197	5	64
TBC1D2B	581	950	626	694	2349	140	632	407	911	995
FOS	2012	695	612	813	1605	161	351	3044	1830	1159
ANAPC1	2366	1103	680	1956	4770	573	7688	1630	3905	5783
PAK5	1	0	0	0	0	0	48	0	0	51
ZNF865	90	79	96	150	229	51	141	101	204	183
SURF4	1108	782	779	1300	2594	312	1201	1166	1833	2064
PDZRN4	0	1	3	0	79	0	99	1	0	239
RUNX2	434	332	182	1971	744	107	1948	322	127	1060
HEXIM2	62	20	66	59	53	52	59	41	85	60
NDUFAF2	417	119	85	169	427	86	187	222	278	118
CDK12	3274	1092	1660	2404	4282	1245	3839	3264	3700	3955
RNPEPL1	991	495	498	574	1145	164	222	196	2719	805
SNORA74C-2	1	3	1	1	15	0	0	0	0	2
VASH1	86	142	154	106	433	138	171	97	411	491
COX7A1	4	26	12	9	56	34	2	16	23	12
ORC6	464	118	126	272	959	104	1554	346	1254	1519
P3H2	1223	17	234	44	492	3	3431	30	79	3123
RPS23	3541	2162	2164	2835	5704	1439	13819	1423	5204	7817
MIOS	757	555	497	594	1937	657	1812	1571	1132	2689
LINC00630	5	1	0	0	5	0	5	0	4	9
SUFU	173	567	294	368	733	107	1048	243	618	1135
EPB41	978	870	512	1878	2589	214	5477	1313	1468	5018
ARL8B	288	482	373	732	1295	138	754	997	1533	428
EXOC3L4	2	15	67	7	25	0	2	3	6	3
PATL2	117	200	90	65	138	9	49	10	23	38
CLSTN2	3	6	13	10	24	5	3	0	25	29
HINT3	48	56	50	153	168	2	108	159	146	109
MTFR1L	656	365	333	702	1167	279	689	511	786	977
LINC01715	0	1	1	1	0	0	3	3	0	4
ATF7IP	4190	2635	2125	2922	4505	2158	8466	4121	4508	8202
ZNF236	683	593	662	1084	2153	360	3483	1077	2799	2893
DPH3	70	173	69	112	326	13	134	301	375	93
THAP7	48	94	121	91	229	31	126	198	286	277
UBQLN3	1	1	1	0	5	0	7	0	1	5
HPS5	3017	3542	762	1302	1567	506	1078	1339	5400	1838
TLN2	808	719	321	800	1302	387	2013	1085	2246	2695
POU6F1	72	47	55	57	91	19	215	116	150	169
DCAF8L2	0	0	0	30	0	0	0	1	2	0
C16ORF86	4	31	64	45	57	73	3	45	146	34
FOXL2	0	0	0	0	0	0	37	2	121	71
RELL2	143	31	37	44	60	4	19	161	93	51
THUMPD3-AS1	4	15	10	8	23	16	22	20	28	36
CCNB1	617	224	333	538	2178	316	2404	839	1464	1644
SMC4	3091	999	1200	1710	5993	1566	12663	4334	4834	7657
TOP2A	3338	1094	1356	2301	11858	1841	23316	9268	5274	11057
ZNF711	8	6	16	9	49	11	1799	0	5	2291
TSPEAR	9	3	4	0	9	0	7	0	0	2
UPF3B	567	214	254	247	1226	60	848	573	391	1463
LOC105377590	13	11	1	3	9	0	10	9	3	16
POP5	180	88	104	278	449	34	259	164	345	285
FAT3	5	4	10	17	93	4	457	20	12	957
TMEM104	363	186	217	327	644	41	345	383	575	526
SNORD114-5	0	0	3	0	6	0	9	0	0	11
NIPAL2	263	310	207	108	316	214	101	439	247	247
KCNIP4	0	11	7	0	4	0	70	8	28	21
MKNK2	1512	496	571	668	1350	75	595	329	1641	920
HES2	0	0	0	1	11	1	0	1	1	0
TNFRSF21	858	449	1708	2743	1877	59	697	850	1413	926
KRT79	0	0	0	0	3	86	0	0	0	2
BHLHE41	601	1411	268	642	1476	109	48	3651	32	112
CCND1	2847	1147	1551	3587	6919	578	9398	3099	7454	4026
CTNNAL1	392	169	354	1475	2976	218	926	1198	1511	1244
ENSA	399	313	225	385	487	110	3068	417	364	2281
KLHL35	1	9	0	37	75	38	19	54	39	73
LRRTM2	16	1	24	1	47	18	8	10	1	4
APP	23610	7365	5990	8066	18296	5214	21936	11084	20974	34832
SAC3D1	46	25	33	102	108	43	61	40	178	114
GPR21	18	17	19	51	96	63	115	53	83	119
FAHD2A	182	259	100	170	581	91	139	125	419	461
HLA-DRB6	48	267	703	201	138	99	12	92	64	28
SLC12A4	838	893	720	1512	1326	463	1189	863	4686	2676
LINC02001	5	4	0	7	10	0	11	10	13	4
EDN3	0	0	0	2	0	0	17	0	0	201
FRG1CP	385	221	96	202	969	95	12	269	338	40
SPIN2B	170	31	72	63	172	60	104	35	75	225
ACTA2-AS1	79	49	45	29	171	14	133	17	91	74
CYTH4	129	247	375	224	1058	67	80	91	139	170
TMEM147-AS1	20	20	25	6	39	3	20	11	58	47
MIR584	1	0	0	0	0	0	2	7	1	4
LYPD6B	0	4	0	0	6	0	19	0	9	31
GRIP2	2	108	27	37	39	0	14	4	25	85
LINC00504	0	0	2	7	1	0	0	1	0	0
MPG	130	106	168	129	396	108	191	45	634	434
UBXN2B	221	405	146	454	719	59	944	458	429	987
RAP2C	201	96	109	69	451	31	209	99	168	298
FKBP14	95	134	91	137	339	54	264	395	200	391
ICAM5	28	4	24	77	7	46	13	50	9	24
ADAM17	1095	1125	531	1454	2230	324	1446	997	1524	4854
SOX17	4	3	8	9	30	0	23	3	10	65
SOD2	1488	3033	2097	728	5052	112	489	739	916	518
AMBRA1	1701	1440	1081	2187	1151	666	2478	2048	2142	2599
ZNF671	26	31	86	144	151	61	3	178	199	22
RPS10P7	55	17	18	33	50	12	25	50	38	42
CNTD1	2	1	2	0	10	1	2	10	7	0
BST1	43	94	75	56	120	14	57	183	331	44
TMEM56	6	23	9	2	39	0	20	116	37	26
SKAP1	421	152	57	34	450	7	28	13	15	51
MAPK13	29	95	120	43	219	57	70	23	84	139
TMEM54	59	109	27	74	16	32	43	41	355	83
ZNF528-AS1	2	0	0	4	0	1	15	9	3	15
MVD	148	54	74	92	285	12	211	80	152	401
NOXA1	20	5	23	26	36	5	5	10	58	28
ZNF69	98	85	192	416	549	345	37	323	860	322
LILRB4	175	819	842	420	2083	23	88	319	389	140
LINC01061	875	348	472	267	418	78	1990	215	640	1597
NAIP	313	370	413	304	1202	234	1046	505	448	1101
GRB10	409	1301	827	711	2113	337	2867	2010	3188	3380
BEAN1	4	6	2	33	76	31	8	36	121	26
RHBDD3	64	56	115	45	148	30	206	123	165	259
POTEF	4	64	3	11	12	2	192	17	10	7023
SNORA63C	3	2	2	2	10	0	6	6	12	15
ANO8	199	81	179	213	417	52	164	272	659	401
AP3S1	601	403	175	375	955	80	764	674	484	519
C21ORF33	54	17	27	21	63	12	16	44	43	62
DDIT4	814	481	161	346	968	43	559	205	723	340
UBAP1L	9	26	27	12	30	13	20	8	174	30
NIF3L1	162	165	108	227	745	87	815	159	449	875
LOC101928020	14	3	19	10	54	8	15	10	20	38
ZNF584	110	79	89	73	196	30	107	106	267	158
HS3ST2	8	6	1	14	31	0	10	0	66	3
DDX56	952	698	845	758	2298	568	2613	1151	1203	2516
KAZALD1	27	55	9	35	30	22	28	18	62	93
MPP5	258	339	269	414	821	117	516	883	655	613
EBI3	7	54	26	9	12	0	1	14	4	5
SCAND2P	54	33	38	33	94	21	90	26	80	136
MAP3K3	1076	538	682	1118	1474	314	501	1313	1448	848
LOC105372419	5	0	3	7	9	1	5	0	5	4
NECAB2	14	1	4	16	9	0	131	0	16	192
NDUFB9	1513	658	596	2006	3784	778	3300	632	1392	4409
GBA	3491	4052	1713	13968	6543	734	2376	3630	7439	3331
DCSTAMP	3	6	4	11	35	1	8	54	29	6
TSSK6	1	1	1	2	3	0	5	2	10	1
GALE	268	266	149	604	1387	94	288	227	967	548
SMTN	417	160	338	436	1520	290	932	439	921	993
ZNF441	274	158	336	245	383	58	156	387	366	290
ETV2	10	3	8	9	27	0	8	22	24	18
LINC02552	0	1	0	0	0	0	9	0	2	0
MOV10L1	0	1	5	1	17	6	22	7	3	69
MIRLET7F1	4	2	4	8	13	8	1	7	5	9
SFXN2	95	67	63	123	370	31	421	77	219	503
DNAJB5	33	37	57	84	266	59	82	176	121	197
STMP1	682	202	176	325	518	94	1062	370	491	708
CRYM	27	3	7	133	74	0	28	17	13	51
BEND3	49	58	35	67	115	48	213	76	162	153
EPHA1	7	44	21	7	56	0	2	4	1	3
LOC730098	9	7	8	5	25	0	6	0	7	29
RHOT2	1172	356	640	747	1624	261	1414	212	1306	2045
ZNFX1	1697	2834	1581	3186	3905	608	922	1751	2419	2913
ABCC6	2	20	59	1	11	0	64	0	22	169
NPW	2	2	1	0	1	0	12	0	9	11
TAF6	1648	549	586	815	1076	286	2011	654	1273	1642
PTER	234	113	73	153	422	37	329	142	236	290
UNC5D	0	0	0	0	3	0	147	3	1	94
WNT3	13	4	6	1	19	0	13	10	25	15
SCN1A	12	17	6	0	4	0	1059	63	0	2475
WDR27	360	162	280	171	511	116	1131	244	887	822
RCE1	84	78	57	118	556	11	209	137	252	279
UBE2L5	1	5	1	10	77	2	2	6	0	7
C6ORF52	13	7	6	7	8	0	36	84	22	28
NBPF20	775	363	482	392	1696	177	2166	874	789	2450
EEF1AKMT4	6	0	9	9	10	5	8	18	11	14
CDC20B	27	2	0	0	1	0	3	1	2	1
LOC283335	32	3	4	1	8	8	47	8	8	76
DDX43	3	5	30	7	17	81	0	1	2012	2
OR6A2	7	1	3	0	14	13	38	0	19	48
LPAL2	52	23	21	7	229	119	118	0	60	393
PIK3R4	1125	540	738	1163	1471	525	1751	1166	3199	2291
PRC1	684	354	503	722	4227	319	3157	1290	1552	3047
NPAS3	180	215	220	5	168	125	336	349	122	400
THAP11	67	74	95	107	157	98	144	57	759	235
PMEL	54	37340	19146	31911	216436	7623	69	56017	219012	74
DDX21	1126	1197	903	2337	5909	525	6122	1478	3371	3170
IQCG	295	101	131	292	599	101	314	466	404	430
SP6	1	1	1	2	2	0	3	3	5	15
SLC41A3	1107	214	352	384	414	65	671	259	847	742
SRSF9	665	377	384	428	1039	206	1958	609	1053	1463
MRPS35	539	257	258	356	607	156	1993	431	633	1335
DLST	936	676	596	1279	2832	228	1783	509	1958	1560
CCDC87	1	8	2	8	30	3	20	9	3	26
MRC1	5101	1601	2463	6068	3499	814	1293	1379	3710	1549
NDRG2	806	174	555	175	366	118	462	289	268	748
UBE3A	3657	1778	1664	2460	10952	1355	6406	2457	4475	9424
TMEM50B	510	234	171	237	413	79	179	285	655	367
IL6	4	21	26	3	16	0	0	14	6	12
HDAC8	681	195	266	279	652	218	614	364	555	981
NRK	2	20	6	1	1	1	1010	1	3	1119
LOC145694	3	19	7	29	37	6	13	12	10	35
PPM1D	521	465	399	763	1087	147	1200	1079	778	1795
OR10AG1	0	0	0	0	0	0	10	0	0	6
PSMB1	526	475	483	559	2358	114	1242	739	737	1043
MEF2A	2099	1163	815	1397	4525	551	2194	1307	1701	2931
TMPRSS6	0	3	4	7	3	0	1	1	3	0
SAR1B	760	412	378	658	1514	165	515	971	536	547
SMCHD1	1972	3522	1853	4160	9068	1102	14773	5024	5663	8829
ARL6IP6	171	105	39	180	561	59	472	112	300	418
DNAJC17	177	131	201	173	284	51	316	119	367	468
DGCR2	305	329	516	372	609	87	614	651	773	968
TBC1D3P1-DHX40P1	3	3	1	2	3	0	6	1	5	11
RWDD2B	145	89	136	112	260	171	203	207	403	177
RHOBTB2	553	268	424	336	444	89	623	337	1167	504
TRIM56	595	363	499	188	504	105	306	282	349	589
CPVL	854	2339	604	935	2194	332	2014	2589	375	1860
DDX60	1187	2655	1804	2922	2446	177	1575	2902	1003	1539
HILPDA	145	65	31	75	62	8	371	34	85	262
PSMG3-AS1	37	30	18	9	85	10	33	58	27	46
GGN	3	2	6	3	3	1	2	0	2	3
ACTB	49432	90587	84348	78350	249023	31444	169333	89164	160367	163447
FAM66C	4	2	0	0	1	1	8	0	1	9
PDCL3P4	116	9	11	9	39	0	54	20	31	118
DCAF13	667	390	280	1329	1484	321	3542	1144	893	2260
TRMT10B	130	88	93	98	183	10	142	141	112	276
SCAMP2	538	554	483	638	985	105	472	363	876	773
POLR2I	331	176	204	361	715	94	329	239	559	293
HTATSF1	1432	506	670	452	2072	304	2709	1105	1715	2407
CASP12	46	2	4	2	5	1	6	0	2	5
GRHL3	0	1	0	0	30	11	0	13	0	0
NKILA	0	0	0	0	4	1	11	2	0	20
CYBB	932	2438	2633	1446	6572	133	357	1541	751	685
TMEM214	1474	1008	972	1479	2552	461	1887	759	1849	2124
ARL9	7	19	12	2	80	0	38	3	4	44
PLOD2	855	259	478	380	1137	61	1503	571	609	2305
ASNA1	555	453	415	923	1065	208	673	515	1084	468
IL20RB	7	4	8	2	85	2	21	2	15	40
GSDMA	4	0	2	2	66	8	2	2	7	1
SZRD1	717	398	305	934	901	220	1212	850	806	925
AZIN1-AS1	3	2	10	3	5	0	6	5	5	14
TGFBR1	1332	948	1098	2464	8372	914	2085	3065	5513	3803
TMTC3	722	338	211	452	1200	179	1878	985	955	977
RPS14	4251	1809	2588	3484	6280	928	6331	1269	3531	6947
IRF5	60	77	114	71	205	1	5	41	118	32
FABP7	73	153	38	0	92	0	183	126	76	134
LMX1A	0	0	0	0	0	0	15	0	0	33
B9D2	14	17	12	9	14	0	14	2	14	23
SNORD50B	4	17	6	7	67	2	35	8	11	38
FAM27E2	145	57	3	41	29	59	51	333	11	144
RENBP	1115	511	577	691	1565	275	131	509	1244	620
C16ORF47	19	1	5	0	7	5	7	5	2	26
CSNK1G3	906	587	671	891	1247	362	1895	1016	772	1237
APOBR	11	50	57	40	202	6	16	15	45	10
ZNF876P	9	3	37	37	84	7	34	6	72	31
ZNF143	478	363	309	554	936	151	2407	435	769	1884
SAYSD1	34	55	60	84	118	53	124	86	82	253
ANXA2P2	61	73	83	182	284	41	85	104	299	50
DMAP1	344	151	143	331	498	73	933	233	405	648
CELF5	4	3	0	9	17	0	10	3	31	52
PNLIPRP2	5	0	0	0	0	0	6	1	15	3
KRAS	302	206	112	173	790	91	1067	309	432	946
FOXN4	2	0	0	0	8	0	26	0	0	86
TLR7	28	133	80	44	248	0	13	137	55	46
WBP2NL	59	13	14	30	34	0	223	24	13	451
PODXL	313	152	215	618	1469	218	663	245	409	907
SPATA7	239	138	107	214	884	67	706	348	452	843
SUMO2	1581	1480	914	2064	4776	503	6928	2868	2062	5895
ELOF1	251	130	122	201	369	72	232	183	236	212
SZT2	3875	1932	2010	2965	4510	1478	6376	3226	4354	6617
PUS10	93	76	44	83	169	38	83	91	151	139
GAS2L3	2389	538	347	1379	2795	1141	3260	3514	2103	1678
ZNF619	120	113	126	90	555	60	163	177	324	137
CTRL	18	11	30	11	48	3	41	10	71	76
LOC101928673	5	7	5	0	12	2	6	6	10	1
ZFHX2	25	83	106	12	62	0	38	17	109	117
AP3B1	2543	1201	1508	2361	5024	741	3207	1611	3541	3576
TNNT1	170	182	2	4	29	0	77	3	113	65
HERC1	11369	5363	11945	7945	16484	3404	9791	6770	8831	13014
UTP23	140	85	54	148	173	49	514	93	95	420
P4HTM	26	91	103	30	323	20	1	14	286	72
ZBTB41	1648	1262	699	1242	2129	323	2556	2715	2189	3405
MBOAT7	193	151	90	102	184	12	175	75	366	254
ART3	12	18	9	0	12	0	119	4	1	15
GMPPB	82	71	130	73	491	46	130	179	217	170
METTL16	756	626	312	396	831	180	1155	726	863	1339
RPS13	1796	1038	650	1441	3027	663	7306	1095	2561	4187
TARID	2	1	0	0	0	0	8	0	0	6
SNCB	2	0	0	3	8	0	2	0	30	26
CEL	34	6	25	12	25	39	67	4	84	234
FAM91A1	1837	3475	1419	4375	4009	842	4322	3951	4553	5362
CHERP	924	400	569	606	1092	273	1572	506	1142	1363
SLURP1	0	0	0	0	24	0	0	0	0	0
TSPAN10	86	931	366	624	513	113	20	1820	1988	31
TIGD2	107	116	51	109	262	15	136	265	79	147
FRAS1	928	37	650	108	235	19	3419	50	1827	5406
TULP2	13	1	1	0	5	0	0	0	2	0
TATDN3	569	207	155	219	249	113	447	177	416	445
LINC02581	30	7	4	9	28	1	49	6	41	63
GIT2	2492	1501	1216	1318	4250	383	2081	1141	3580	1794
LOC100506688	23	12	2	6	3	1	1	5	2	0
CFAP77	0	4	0	0	4	0	2	0	21	1
ABHD2	908	831	645	620	1966	190	615	241	1636	870
RNASE1	2647	125	4955	606	1381	79	652	90	388	266
ABCB1	94	389	99	76	316	77	214	98	63	177
PPT1	1844	1214	741	1997	2774	422	3696	1703	2557	2633
POC1A	86	47	87	205	936	72	251	226	573	204
DUOX2	1	6	9	2	19	15	96	2	0	678
EMC3	536	532	422	915	2005	211	554	1131	1511	493
EBF3	13	9	80	33	124	24	3770	13	34	3956
PLSCR4	496	75	250	64	457	104	141	229	462	404
OPCML	0	0	0	4	3	0	3	0	3	8
C19ORF53	232	113	114	140	187	7	209	155	272	158
CARMIL3	17	150	27	110	122	16	63	212	307	90
DACT1	29	139	42	59	287	18	532	78	231	460
DTD1	978	289	353	408	693	156	747	241	978	1102
RORA-AS1	3	0	0	2	1	3	3	0	1	5
ZMYM2	1812	1389	2026	2075	7634	1147	9782	1898	4134	9882
ISOC2	180	89	177	160	219	14	97	44	169	101
CCDC157	23	33	30	16	63	34	114	77	61	232
CABP7	0	1	0	1	364	1	2	1	0	4
DHRS4L1	7	15	10	10	49	0	18	17	23	22
IQCK	141	111	127	147	440	68	333	127	149	553
H1FX	163	99	130	102	456	61	623	68	593	1072
DIABLO	893	1083	461	1069	2235	863	2929	1679	1897	2227
CLUAP1	346	172	203	389	582	109	678	91	430	1103
CARS	688	405	339	890	1118	261	1445	584	756	1550
MINCR	1	2	0	1	3	0	5	2	3	1
SMIM1	15	7	2	5	13	0	9	15	47	31
TEX30	27	71	61	88	119	30	68	151	586	90
GOLGA6L10	142	31	69	116	481	35	1614	243	154	3562
LOC654342	7	0	0	1	16	0	10	0	3	21
MDS2	0	0	4	0	5	0	1	0	4	1
LIN52	18	30	21	73	146	31	92	40	99	94
OR2M2	5	0	0	0	5	0	125	0	0	47
DERL1	250	444	204	689	1046	178	1253	361	443	1518
RPS15	3907	2251	2167	3108	5042	1153	4403	1788	6463	4317
UTP6	1117	412	573	973	1585	433	2269	1274	1323	1273
USH2A	23	0	4	3	32	0	9	0	10	30
SRSF1	1533	881	838	1096	2944	545	4575	1026	2013	4689
MTRNR2L2	61	30	16	45	51	2	37	17	24	51
ANKRA2	517	330	205	272	442	150	335	215	410	343
GUSB	1884	1679	1160	1151	4589	347	2156	863	3150	2875
RPL21P28	4	5	2	7	36	1	27	9	12	27
BIRC7	854	475	617	475	510	229	3	652	1784	18
KIAA2013	286	215	272	512	637	109	489	258	785	983
C8ORF48	28	17	26	12	61	0	0	19	39	19
CLK4	469	233	299	370	563	241	667	285	387	561
LOC101929124	0	0	2	0	0	0	2	0	0	10
RASSF8-AS1	3	1	3	2	5	0	19	6	1	11
KIAA0232	1414	772	762	832	2069	355	2714	1345	992	3090
RAMP2	50	95	44	80	128	17	230	44	410	199
TXLNB	95	26	41	17	84	0	5	21	5	11
PTPN11	3860	3482	1510	3318	14689	1232	15264	4565	5733	9834
TRIM65	129	90	160	84	307	33	211	141	467	281
LOC644656	2	1	3	0	0	5	5	3	0	4
C1ORF61	2	1	0	2	2	0	49	0	3	160
NAV2-AS2	1	6	0	0	3	22	1	28	1	0
UBN2	3422	892	846	1474	2022	774	3966	1331	1825	4419
CES5AP1	1	0	0	0	0	0	0	0	0	17
PSMC3	1814	906	851	1570	1803	694	3514	1745	2069	3130
MIR1249	4	1	4	1	1	0	0	8	5	8
OPHN1	375	218	220	115	681	103	421	522	534	1010
SSH1	1403	1453	1272	1643	5236	685	1335	2834	5360	1694
MIR186	12	12	7	16	19	9	20	33	26	39
ZMAT1	340	130	290	29	359	93	413	41	348	816
ASAH2B	9	3	5	10	63	0	68	0	21	112
NEXMIF	0	2	6	3	7	5	112	4	1	209
HIST1H2BI	330	331	278	134	501	48	4347	30	83	191
CTBP1-AS2	73	31	26	26	45	8	59	39	98	61
DSE	364	493	370	272	1431	188	1280	532	239	967
ACTL8	0	1	0	2	0	0	15	0	0	16
LOXL1-AS1	3	2	1	1	2	1	3	1	4	3
LRRC43	54	4	8	7	60	1	28	8	59	70
TMCO4	674	187	205	108	834	44	94	116	401	279
SPANXB1	21	0	0	63	0	0	0	8	0	0
PPT2-EGFL8	0	4	1	6	5	0	2	1	0	5
LXN	115	99	347	46	175	75	28	120	535	60
TSPAN6	260	263	124	241	553	93	969	421	270	1205
CORIN	8	10	10	34	132	0	44	15	7	228
KLHL11	276	90	183	297	624	103	588	403	435	501
NRTN	0	0	1	3	4	9	62	1	48	42
LOC103611081	5	4	3	7	11	5	14	13	7	4
DUSP12	430	206	185	229	654	35	1095	237	519	1568
CYP4X1	215	6	11	17	25	34	102	2	10	110
POLR2C	637	315	354	434	774	101	1814	344	462	1729
PPCS	333	176	115	475	523	84	234	342	411	239
IGSF9B	67	30	22	22	40	45	312	2	86	388
MLST8	300	138	188	375	591	25	345	97	589	702
RASSF4	138	425	314	154	400	37	46	235	167	166
TMOD1	275	46	75	111	295	91	52	135	208	335
RBM4B	115	92	61	101	308	35	237	130	217	489
CCDC88B	75	203	260	63	389	15	46	65	60	66
MUC20	25	44	126	9	154	18	43	13	132	38
LOC105373159	10	0	0	3	1	0	19	6	5	20
MTA2	1243	1113	864	1174	2911	376	3846	1813	2184	3752
WWOX	330	185	264	271	689	55	546	404	420	1141
C9ORF147	3	1	4	6	16	1	6	17	8	14
EPOP	3	1	7	13	6	4	29	1	25	24
ACAD9	1683	541	991	1230	2550	425	1871	789	3542	3551
BISPR	6	12	6	11	5	2	1	5	10	0
HERC2P10	33	16	13	28	49	4	88	12	33	138
FAM120B	1662	879	1261	1203	3513	793	2768	1677	2491	3846
FAM84A	5	8	11	7	23	2	51	5	4	61
PPP6R1	1934	1240	1492	1469	2739	337	2972	1147	2757	3104
LOC440910	0	0	0	0	0	0	65	0	0	52
SOCS4	166	186	190	378	866	214	549	756	697	442
LRRC71	7	1	1	5	0	0	8	1	3	53
LOC100505715	2	0	0	2	1	1	3	1	5	2
ZNF714	793	278	482	723	2196	312	1527	938	1358	430
SIX4	3	7	35	40	60	3	190	23	46	166
UBLCP1	497	437	369	579	1368	169	754	1161	445	539
ASB9	235	119	264	74	216	11	31	1234	204	45
FNIP1	2739	1396	1675	2724	3654	1209	2493	3820	1664	2475
CCDC25	143	139	190	399	570	70	838	718	464	339
MSC-AS1	72	209	387	509	190	526	433	341	35	383
RNF187	489	283	260	338	550	84	786	223	871	1035
MUTYH	466	230	212	507	541	218	1458	574	613	1348
LOC100286906	3	1	0	0	0	0	85	0	0	48
WDPCP	338	153	187	357	676	120	618	330	652	1091
SMG1	6689	6413	5663	11835	20102	4231	14913	5299	12333	17721
ARHGEF33	18	8	5	14	56	43	29	9	15	32
SMIM26	482	305	209	380	386	96	369	320	730	549
GSC	2	2	0	7	8	0	85	0	7	87
RNLS	78	62	26	32	102	9	110	58	139	132
FOXM1	694	250	391	662	1874	215	1995	1172	1661	2630
NFASC	2064	700	96	112	245	36	753	97	75	1958
MYL2	0	0	0	0	15	0	0	0	0	0
CLEC16A	924	496	585	1433	1988	312	1138	587	1121	1914
GSE1	1418	570	739	642	870	236	1778	343	765	2267
LINC01579	9	0	0	5	0	0	0	0	0	0
REXO5	207	41	61	116	530	19	271	123	176	264
PLEKHA4	316	339	457	349	1078	202	400	497	798	694
CXORF67	20	0	1	0	0	0	56	0	0	90
CD69	21	227	46	30	107	24	3	44	26	3
PARS2	40	12	17	51	35	6	53	40	39	65
ACER2	13	9	5	34	24	20	43	10	41	48
CAMP	10	3	0	3	1	1	0	0	3	0
PFDN6	47	54	69	277	292	23	159	50	100	172
LOC102724532	0	0	2	0	2	0	3	3	5	1
SYNPR	0	288	3	3	1	0	239	2	859	585
QSER1	1755	1204	870	1488	2913	1030	5447	1956	3558	4672
C16ORF89	70	3	18	23	10	0	6	8	3	14
KIF25	18	1	4	2	3	8	6	0	1	3
SNRPB2	625	357	199	378	1218	34	1123	358	833	1147
LRFN4	51	47	54	69	637	80	180	75	458	316
STX16-NPEPL1	47	16	22	38	72	15	1	22	26	74
ZBED5-AS1	5	8	5	1	9	3	5	3	9	0
SPRR1B	0	0	0	2	41	44	0	0	0	0
SH2D1A	7	81	36	21	87	0	0	4	5	1
PIANP	0	0	5	15	0	0	15	0	2	62
AKR1C3	21	10	8	11	126	5	115	6	31	236
ZNF273	226	234	262	209	1394	87	1822	412	368	3073
LINC01748	1	0	0	0	0	8	6	0	0	0
PCDHGA5	219	9	158	44	24	84	155	26	17	494
ABCA7	741	286	431	457	1527	104	68	348	649	153
UBA6-AS1	75	27	37	43	134	17	68	54	69	100
FAM78A	14	96	39	27	80	11	13	33	115	37
MCF2L	86	51	209	639	1329	1287	204	1659	235	1075
MIR99A	1	0	1	1	0	15	0	0	0	11
LINC01347	489	28	82	23	118	56	56	99	90	94
SLC30A7	774	704	429	917	1518	210	1950	890	1357	1574
ANKRD33	0	0	1	0	0	0	0	0	1	16
TRPM6	38	56	32	4	508	13	57	18	915	92
CHGA	1	2	1	5	0	0	1	0	15	0
CSAG1	28	2	60	682	1101	0	1129	1376	1	1
TAS2R20	151	72	85	84	225	39	270	52	98	812
ZFYVE27	376	452	361	428	1104	64	897	549	1189	1281
LAMTOR5	569	326	213	835	606	62	594	570	919	647
SNORA81	7	4	16	2	12	9	27	1	12	30
LINC00899	0	1	0	0	1	1	7	5	0	7
PURA	138	118	157	112	251	72	160	269	148	189
IGFBP7	706	912	1838	1594	5655	417	605	539	1172	2208
LRCH1	449	381	886	596	1424	203	779	754	1210	956
TOMM22	257	210	307	375	829	128	1447	733	646	974
TIMM13	381	136	252	303	443	79	427	172	496	400
ACOT13	72	101	80	201	293	26	322	361	162	229
LIX1L-AS1	0	11	0	0	5	11	26	6	0	5
EGF	693	165	104	83	67	1	104	191	29	154
PANK4	754	263	338	573	789	121	1125	2001	606	1107
DHDDS	414	295	182	471	984	144	372	339	730	693
[truncated: 17,048 more rows]

## Sheet: RNAseq_normalized
	S12-24550_high	S13-56716_high	S14-43413_high	S15-55333_high	S14-04739-A4_high	S14-4793_low	S15-56658_low	G13-77628_low	S16-35474_low	S14-53113-A1_low
MIR648	-0.846574	-0.0232974	1.03184	-2.29621	-0.229701	-0.228864	0.49532	0.991818	0.546257	0.559408
PYCR2	1.73402	-0.413207	1.13074	-0.889981	-0.635156	-1.011	-0.538041	-0.601122	1.29255	-0.0688068
HERC3	0.666768	0.359365	0.656451	-0.265857	0.646116	1.32893	-1.57455	0.589106	-1.104	-1.30233
ETNK1	-0.336616	0.652265	0.359576	0.0475508	-1.75792	-1.18909	1.68183	-0.51733	0.240244	0.819492
HERC4	-1.67592	1.27689	-0.434619	0.837099	0.356421	-0.0658141	-0.0565187	-0.645574	1.43622	-1.02819
UBE2N	-0.324515	0.377991	-2.03695	0.590425	0.628725	-0.325404	1.2336	0.879151	0.172187	-1.19521
CLEC12A	-0.460837	1.47419	0.755316	0.10596	1.42362	-1.4024	-0.634442	-0.835172	0.438172	-0.864406
PARP8	0.289695	1.40623	0.639017	-0.898568	-0.131215	-1.35442	0.937349	-1.60207	0.0645566	0.649425
EIF4B	-0.0753758	-0.135609	-0.718463	0.103126	-0.790103	0.013615	2.12262	-1.37583	-0.299951	1.15596
STAT5B	0.625118	-0.461733	1.77713	-0.678032	-0.869746	1.08727	0.118938	0.259618	-0.21136	-1.6472
SLC25A24	0.16624	0.717607	-1.17658	1.3835	0.592776	-0.153348	-1.22258	0.336822	0.89604	-1.54047
SNORD6	-0.757573	-0.010225	-0.265648	-0.645337	-0.89049	2.48006	-0.254937	0.841119	-0.0256466	-0.471324
MXD1	0.555569	1.30092	0.0626051	0.190501	-1.62499	-0.813002	1.27983	0.518418	-1.31383	-0.15602
NLRP3	0.309468	0.549817	0.89777	0.306812	0.718101	-1.76835	-1.0963	1.40463	-0.588755	-0.733199
CD40	0.852595	1.45648	0.665453	-0.484288	0.642385	-0.0433963	-1.57038	-0.609652	-1.40559	0.496394
SNORD11	-1.29325	0.232238	-1.52142	0.184615	1.27348	1.33475	0.684049	-0.629364	-0.690367	0.425261
FCRL1	0.350786	2.08733	0.930733	0.40877	0.120675	-0.926758	-0.926758	-0.926758	-0.191256	-0.926758
ERC1	-0.335268	-0.0205314	0.304638	-0.437882	0.116989	2.64236	-0.863976	-0.827782	-0.351972	-0.226571
TMPRSS9	0.529189	0.110488	1.49958	-1.18782	-0.447389	-1.18782	0.291617	-1.18782	1.37858	0.201402
CNNM2	-0.133117	0.530185	0.385041	0.24394	0.400943	-2.73913	0.297608	-0.153309	0.450043	0.717795
KLF5	-1.16147	-1.15766	-0.387431	-0.434519	0.477482	0.581583	2.14596	0.0959379	-0.703864	0.543982
DSCAML1	1.64865	0.0484603	0.370714	-1.28347	-0.0859484	-0.131248	0.339903	-1.93854	0.695762	0.335718
TMEM98	0.881969	0.307172	0.343812	-0.635149	-1.42743	-1.7932	1.38841	0.0565429	0.30326	0.574608
TPTE	-0.139226	-0.253459	-0.529371	2.75298	-0.529371	0.278801	-0.529371	-0.298019	-0.223592	-0.529371
FIG4	-0.419371	0.657516	-0.0290629	0.199775	0.952721	-0.386455	-1.21715	1.52912	0.506683	-1.79377
GPATCH11	0.0255135	-0.449802	-0.938756	-0.460632	-0.0516505	-1.20128	2.02756	0.901234	-0.739638	0.887447
TRIM23	1.25343	0.321125	0.796347	-0.123029	-1.11734	1.42713	-0.940527	-0.118001	0.0778146	-1.57695
GALNT1	-1.21746	-1.1134	-1.39459	0.0152388	0.547682	0.0804653	1.35125	1.43275	-0.0784668	0.376533
SSR4P1	1.33683	-1.34803	0.117039	-1.34803	0.684584	-1.34803	0.263341	0.786595	0.763093	0.0926053
WAC	-1.19433	0.446811	-1.08122	0.431416	-0.452245	-0.636331	1.02547	2.04382	-0.219684	-0.363709
SGF29	0.318977	0.0045201	0.641388	0.618624	-0.0069263	-2.58093	0.672799	-0.413592	-0.147812	0.89295
ADAM8	-0.228147	1.39284	1.97031	-0.642717	0.594955	-0.348877	-0.436882	-0.811839	-0.372279	-1.11737
ZNF454	-0.769803	-1.28624	-0.578443	-0.0152891	-0.249554	-0.586855	1.1765	1.2956	-0.596264	1.61035
WEE2-AS1	0.589371	1.26046	1.80278	0.617489	-0.826229	-0.826229	-0.826229	-0.826229	-0.826229	-0.138954
C6ORF58	0.380873	-0.924294	1.27404	-0.924294	0.855507	-0.924294	1.05751	-0.924294	-0.924294	1.05354
GZMM	-0.072893	1.01235	0.729612	-0.369176	1.70399	-1.16042	-1.16042	-1.16042	0.587937	-0.110545
SEL1L3	-1.16613	1.35292	1.23018	-0.290682	0.927068	-1.38027	0.341823	-0.509171	-0.939652	0.433916
NFATC3	-0.393249	0.572706	-0.969207	-0.684523	-1.20926	1.95395	0.220741	-0.138402	1.20449	-0.557247
ECD	-0.652005	0.389693	-0.865048	1.59139	0.152262	-1.70402	1.27666	-0.303404	0.550623	-0.436155
XKR6	1.16192	-0.457442	0.794833	-1.41623	-1.18844	-1.15414	-0.0780191	0.562532	0.603796	1.17119
MSH4	-0.984918	-0.559174	0.0450034	-0.113094	-1.27082	2.20337	0.870378	-0.333211	-0.349413	0.491886
UBE2K	-0.395115	0.283132	-1.4329	-0.256511	0.441012	0.605202	1.81413	0.518685	0.0109918	-1.58863
HAND2	-0.441047	-0.0538769	-0.676268	-0.436332	-0.0319951	-0.676268	1.99773	-0.676268	-0.676268	1.67059
LINC01126	-0.273621	-0.290736	-1.06916	0.529764	0.514026	-0.354528	0.722367	-1.34712	-0.530693	2.0997
RRS1	-0.822028	-0.420606	-0.397592	1.24732	-1.1821	0.419884	1.76637	-0.106752	-1.14698	0.642482
SNAI2	-1.16597	0.879419	-0.597606	0.108965	-0.719371	1.67796	1.00186	0.666287	-0.96641	-0.88514
CTSB	-0.784435	0.868762	0.998131	1.02769	0.839919	-1.14397	-0.896458	-0.506026	0.898696	-1.30231
DAZAP1	0.17616	-0.555519	-0.651036	0.506141	0.450529	0.171121	1.92095	-1.4764	0.659462	-1.2014
EXPH5	-1.12544	-0.616002	-0.715306	0.508507	0.10713	-0.377782	1.30075	1.24566	-1.41521	1.08769
LEPROT	-0.167817	-0.490985	-1.63126	2.19166	-0.408642	-0.398068	0.346987	0.85803	-0.290277	-0.00962894
MRM2	-0.921238	-1.14676	-0.795782	-0.785874	1.32529	0.134261	0.00109514	1.0904	-0.455322	1.55393
AKR1A1	-1.75508	0.511832	-0.0142866	-0.0592787	1.32326	-0.578012	-0.309031	1.63875	0.12117	-0.879324
STK11	0.763427	-1.02132	1.43107	0.254875	0.336087	0.472384	-0.652695	-1.90189	0.803737	-0.485677
SELENOV	-0.821365	-0.305532	-0.821365	-0.821365	-0.821365	-0.821365	0.980559	0.493615	1.546	1.39218
HIST1H3F	-1.5959	-0.482907	-0.141008	-0.191221	-0.222958	0.833893	1.93761	-0.0549223	-0.951686	0.869092
PPIP5K1P1-CATSPER2	1.62566	0.642024	0.487161	0.87242	0.298477	-1.41142	-1.41142	-0.570053	0.184342	-0.717189
NDUFB11	2.27411	-0.166749	0.684384	-0.106748	-0.899892	-0.211101	0.361762	-0.56885	-1.41755	0.0506366
MCTP1	-0.614792	0.371192	0.712009	0.127543	1.81458	0.833269	-1.3035	-0.743095	0.110623	-1.30784
CRTAC1	0.246008	1.50202	0.533532	0.887059	-1.79246	0.722505	-0.799753	0.0501131	-1.07758	-0.271442
ARHGEF17	-0.788499	-0.745732	0.370776	0.306964	-0.0879285	0.885434	-1.89633	1.17492	1.26132	-0.480929
PRR13	0.974577	1.22742	-0.400591	1.05597	-0.211572	-0.188156	-1.79941	0.662816	-0.0956803	-1.22539
BST2	0.115304	1.28053	0.669482	1.11385	0.534541	-1.38695	-1.62721	-0.13866	0.278302	-0.83918
CHORDC1	1.15165	0.0254298	-1.0223	-0.762772	-1.00725	0.180179	0.798928	1.79726	-1.05837	-0.102746
ZCCHC11	-0.457969	-0.559355	-1.2343	-0.16548	-0.392627	-0.462635	1.05611	2.011	-0.72736	0.932618
VCX3A	2.40467	-0.721354	0.644091	0.440534	0.0603097	-0.721354	-0.721354	-0.721354	-0.721354	0.0571672
ANKRD29	-0.821875	-0.462509	-0.229079	-0.916018	0.423159	0.254607	1.76357	-0.462186	-1.10712	1.55744
SNORD115-1	0.224316	-0.541263	1.25977	-0.541263	-0.541263	-0.541263	-0.541263	2.30475	-0.541263	-0.541263
CCND2	-1.13719	0.395049	0.379931	-0.593877	-0.0619523	-0.382808	1.7136	-0.548275	-1.23104	1.46657
IGLL1	-0.765893	1.38523	1.35871	-0.765893	0.954216	-0.765893	0.897206	-0.765893	-0.765893	-0.765893
ASNSP1	-0.34174	-0.268886	-0.682321	0.586216	-0.682321	-0.682321	1.37425	-0.682321	-0.682321	2.06177
TBX4	-0.336706	0.512345	2.09649	-1.14789	0.900127	-1.14789	0.337499	-0.561384	-0.0604658	-0.592127
SCN2A	-0.218918	0.151174	-0.724988	-1.09433	-0.391433	0.171829	1.51771	-0.536767	-0.815203	1.94092
HKDC1	1.75493	-0.115809	1.75285	0.049564	-0.0833876	-1.04468	-1.04468	-0.633181	-0.177664	-0.457939
DENND1A	-0.140491	0.692505	2.11478	-0.601776	-0.710408	0.844377	-1.26914	0.289631	-0.537496	-0.681988
MRS2	-1.18768	-0.910173	-0.0799924	1.99406	0.787392	0.619555	-0.945395	-0.0429477	-0.769836	0.535016
TMEM223	-0.57916	1.25467	-0.493313	0.217013	-1.62249	0.767275	0.531831	0.807429	0.61995	-1.5032
URB2	0.144769	-1.7191	-0.0887461	-0.830633	-0.497046	0.559867	1.70204	-0.781463	0.513013	0.997294
MISP	-0.621173	0.214381	2.64604	0.0809415	-0.621173	-0.621173	0.121786	-0.621173	-0.621173	0.0427139
TDRD12	-0.524585	-0.52689	-0.531242	-0.668737	-0.535629	1.69135	1.58089	-0.583325	-0.87987	0.978039
CD83	-0.294124	0.471827	0.0281654	-0.227135	1.55835	-2.19993	-0.796592	0.599162	0.488237	0.372042
MYT1	-0.771825	-0.777084	-0.614394	-0.0528836	-0.938431	1.21768	0.698356	-1.10171	0.614812	1.72548
LOC101927151	-0.839238	0.529452	1.16383	0.865385	0.108958	0.0355722	0.798834	0.327182	-2.07966	-0.910316
MIR1183	-1.08488	0.687122	0.345251	-0.30154	0.140365	-1.85903	0.213141	1.33353	-0.65973	1.18578
CDK5RAP1	1.73459	1.06263	-0.807243	-0.162984	0.626194	-1.19408	-1.45631	-0.0798443	0.454967	-0.177919
NSUN5	2.11805	0.314561	0.748357	-1.05222	-1.0693	-1.0134	0.547991	-0.521314	-0.0724445	-0.000278916
MPND	1.05829	-0.173775	0.963404	-1.19082	-1.03585	0.526508	-1.23587	-0.178157	1.57986	-0.313582
SEMA7A	0.443382	1.11573	0.20587	0.313557	-1.06378	-0.471212	-0.783902	-1.80079	1.26924	0.771921
CEP72	-0.317239	-0.730575	-0.514423	-1.15613	0.676706	0.0102022	1.19632	-1.12688	0.0643588	1.89766
DNAJC30	2.44046	0.189386	-0.0749992	-0.660543	-1.13681	-0.759919	-0.0503689	0.621729	-0.0146714	-0.554272
CD320	1.05928	0.0170844	0.78679	0.357738	-0.631196	0.470013	-1.44273	-0.798628	1.46479	-1.28314
PKP4	0.194804	-1.45128	-1.45956	0.227009	-0.505243	0.587051	1.73907	-0.149864	-0.179502	0.997513
SNORD135	0.368672	-0.179276	-1.50277	-0.39064	-0.212455	2.37386	-0.0652875	0.401499	-0.0360132	-0.757589
C1GALT1	-1.41098	0.262175	-0.118745	-1.20653	-0.353456	0.963852	0.118932	2.08422	-0.190684	-0.148781
TMEM41A	-0.606687	-0.386586	0.434027	-0.208456	-1.9332	0.997111	-0.486357	-0.0141752	1.7552	0.449119
EIF1B-AS1	-0.684806	0.855245	-0.684806	-0.684806	-0.684806	2.21763	0.505856	-0.684806	0.530104	-0.684806
SUPT7L	1.72498	-0.0653982	-0.305083	0.541173	-1.17813	-0.241409	1.27724	-1.58529	-0.205117	0.0370303
ZNF488	-0.62839	0.237341	-0.62839	-0.62839	-0.62839	-0.62839	1.99405	-0.62839	-0.0713607	1.61031
RP9	-0.369687	-0.0247479	-0.583899	-0.93495	1.0085	0.055185	0.952493	1.9179	-1.01811	-1.00269
GALNT16	-0.362511	-1.90285	-0.288603	0.737682	0.787847	1.57783	-0.505199	-0.899659	0.627097	0.228372
BIRC2	-0.367032	-0.137013	-1.41162	-0.482943	1.5549	-0.269867	0.0256432	1.9213	-0.203626	-0.629735
HNRNPA3	-0.269796	-0.397163	-0.935189	0.22515	0.329368	0.414393	1.90568	-1.75937	-0.355887	0.842809
ATPIF1	-0.711904	-0.485917	-0.974994	0.47718	-0.0252914	-0.0368798	1.85992	-0.445092	-1.12476	1.46774
PEX19	-0.494446	0.517134	-0.534587	0.225645	-1.21671	-1.57524	1.16833	0.354114	-0.0849832	1.64074
REV1	0.105041	-0.00783279	-1.18437	-0.109573	0.642776	1.24322	-0.014666	-1.94408	-0.0828777	1.35236
PILRB	-0.772902	1.41867	-0.335048	-0.74964	-0.354958	2.21741	-0.111866	-0.416154	-0.655389	-0.240119
UGT2B17	-0.556014	0.327987	1.34793	-0.556014	2.21618	-0.556014	-0.556014	-0.556014	-0.556014	-0.556014
MRPS22	0.828597	-1.60326	-1.80683	0.286405	-0.153891	0.169167	1.23824	0.875764	0.205589	-0.0397832
PRRT3-AS1	-1.97557	0.487359	-0.587424	0.390354	0.114927	1.40407	-0.374261	-0.200427	1.35099	-0.610021
FLRT1	-0.199981	-0.546575	-0.930176	-1.02293	-1.5648	0.552279	1.08126	0.952209	0.333797	1.34491
GTF3C5	-1.47752	-1.53103	-0.201948	0.301285	-0.635056	1.03157	0.624798	0.178177	0.151228	1.55849
MRNIP	1.45282	0.617173	0.75454	-0.297903	-2.26761	0.0590514	-0.617238	0.147831	0.456783	-0.305449
SF3A3	0.0939909	-0.652273	-2.03922	0.977274	0.536023	0.874701	1.17818	-0.274983	-0.936539	0.242849
ST3GAL2	-0.362298	-1.16574	0.868131	0.097735	-1.32089	0.0308152	-0.464848	-0.032722	2.18062	0.169196
LOC441455	-0.903062	-0.651668	-1.23205	0.763176	0.505498	1.31864	0.0938221	-0.93155	-0.542212	1.5794
RNF220	-0.589186	-0.438858	-0.104592	0.657461	-1.05091	0.17171	1.91651	-1.58737	0.799731	0.225495
NRL	-0.462549	0.0780823	1.31241	0.127836	0.306732	-1.85868	-0.623645	1.64345	0.102476	-0.626119
ECI2	-0.773271	-0.327486	-0.36429	1.64315	-0.528607	-0.0997254	-0.522784	1.4785	0.884314	-1.3898
DYNC1I2	0.112137	-0.544843	-1.84456	0.542951	0.336401	-0.282667	1.99285	-0.618696	0.599944	-0.293509
C1ORF228	-0.20296	1.09262	0.100272	-0.781364	0.884803	-2.32486	0.622048	0.717444	-0.210608	0.1026
LINC02506	-0.316228	-0.316228	-0.316228	-0.316228	2.84605	-0.316228	-0.316228	-0.316228	-0.316228	-0.316228
BBS1	1.37373	-1.32329	-1.20473	-0.166724	1.52594	-0.039105	-0.482289	-0.760859	0.255183	0.82215
HLF	-0.407267	-0.573768	-0.294183	-1.12074	-0.0831328	2.54491	0.410609	-0.0453251	-0.671215	0.240109
RHEX	0.39537	-0.830151	1.23403	-0.830151	1.90164	-0.830151	0.492661	-0.830151	0.127049	-0.830151
SNORD113-1	-0.703632	0.713913	-0.703632	-0.703632	-0.703632	-0.703632	1.77845	-0.703632	0.208445	1.52098
CAST	0.339885	1.10666	0.575364	0.416643	0.48649	0.0323541	-1.55388	0.105165	0.5406	-2.04929
PPP1R18	-0.354006	0.349785	0.833987	1.5927	0.944981	-1.12784	-0.931887	-1.52025	-0.170254	0.38278
VCL	-2.33873	-0.454359	-0.036258	0.230972	1.34982	0.0602373	0.732007	-0.292407	0.894916	-0.146198
KLK6	-0.173649	-0.842112	-0.375274	-0.842112	-0.194429	2.25806	-0.121618	-0.842112	-0.107173	1.24041
MARF1	0.43183	1.08013	-0.173429	1.05873	-1.51524	1.37403	-0.327946	-1.36703	-0.579032	0.0179552
KIAA1147	1.6517	0.133154	1.01894	-1.43905	-0.595724	-0.105878	0.537722	-1.49277	-0.184862	0.476769
NAPSB	-0.540347	1.78401	1.29376	-0.300964	0.471785	-0.843663	-1.36859	0.469891	-0.118035	-0.847838
ZNF114	-1.18312	-1.50591	-0.748603	1.94428	0.462729	0.52922	-0.290945	0.496517	0.395603	-0.0997727
FAM120A	0.428728	-0.428277	0.419426	0.955241	0.201143	1.17479	-1.59739	-0.459916	0.902122	-1.59586
KLHDC2	-1.06168	0.358602	-1.52117	0.288808	1.08727	-0.82175	0.325046	0.792398	1.41713	-0.864656
ACHE	0.978908	0.836662	1.02565	-0.806404	-0.565972	-1.9158	0.530424	-0.37092	-0.627193	0.914645
ZNF843	0.442301	0.424573	1.45464	0.496085	0.131786	-2.28978	-0.571755	-0.669682	0.459618	0.122212
FNDC1	-1.34081	-0.331956	-0.0541789	0.400846	1.65273	1.1256	-0.158405	-1.1534	-0.954693	0.814275
SMARCB1	-1.77149	-0.278795	-0.333337	-0.257054	-0.450108	-0.309053	1.751	0.8156	-0.367751	1.20098
DAG1	-0.52821	0.27573	-0.00298726	0.430699	0.885467	-0.243562	-1.59791	0.43986	1.72145	-1.38054
TST	-0.419418	-1.21539	0.0739209	-2.02915	0.54056	1.32538	0.000413828	0.436362	0.923097	0.364223
SPINT2	-0.869669	0.726826	1.38998	-0.799033	0.363757	-1.12976	0.205353	-0.23349	-1.16483	1.51086
TGFB2	0.0401035	0.244682	0.058619	-0.0780583	-0.281203	-0.744804	0.686972	-0.517154	-1.62568	2.21652
TMEM50A	-0.0250565	1.19998	-0.81652	1.70229	-0.0184703	-0.313277	-0.949463	0.741412	0.0422656	-1.56316
SLC25A45	0.143011	0.934666	0.24694	0.618053	-0.143974	1.33632	-1.65999	-0.474626	0.58958	-1.58999
SNORA80A	1.58003	0.252308	0.290892	-1.12715	-0.677704	1.62852	-1.00759	0.18913	-0.186276	-0.942162
SAMD4A	0.777839	0.14069	0.383944	0.235354	-0.994089	1.72888	-0.352695	-0.434642	0.436086	-1.92137
SOX6	0.402773	-2.18273	-0.0161432	-0.738716	0.196974	1.66776	0.757518	-0.272642	0.237421	-0.0522123
FLT3	0.456214	1.29477	0.635206	0.0335178	1.17648	0.449312	-1.16206	-1.56594	-0.18211	-1.1354
ZFP14	-1.86847	0.779939	0.185931	-0.139964	-0.647176	1.42495	-0.581864	1.16493	0.411279	-0.729556
LOC101927045	1.14341	-0.446856	0.0804652	1.46359	-0.313216	0.500834	-0.0062191	-0.864151	0.452974	-2.01083
SLC10A3	0.191798	0.441059	0.568656	0.279444	0.72451	-0.414952	-1.56211	-1.78749	1.41963	0.139451
LOC100507477	1.14774	1.60296	0.949303	-0.225207	-0.0811487	-1.12433	-1.12433	0.415216	-0.435867	-1.12433
ZNF788	-1.05587	-0.452702	0.116891	0.0705188	0.736325	1.44943	-1.29895	1.55366	-0.178217	-0.941086
ANKZF1	0.281103	0.641938	-0.168071	-0.393729	-0.445876	1.30547	0.614627	-2.13611	-0.697205	0.997854
TFF3	0.871503	0.666995	0.0983151	0.366757	1.5737	-1.30384	-1.30384	0.0694409	0.264797	-1.30384
ADAM1A	-0.204329	-1.43186	-0.511626	-1.00362	0.539737	0.296941	1.2092	-0.678016	-0.0428404	1.82642
TARBP2	-0.708746	0.722264	-0.535059	-0.441996	-1.66329	-0.021068	0.99896	-0.821695	1.20156	1.26907
BAG4	-1.21387	-0.18575	0.59971	0.701792	-1.58484	0.831114	1.49089	-0.15383	0.489938	-0.975155
EIF2AK4	1.68669	0.553376	0.0727451	0.066099	-0.789554	-1.21745	-0.529971	-1.19827	1.41879	-0.062459
PICALM	0.0157098	0.457668	-1.19004	1.07009	-0.0419392	-0.35935	-0.792603	1.84166	0.387376	-1.38857
PSMB6	1.59455	1.03387	-1.2736	0.0784542	0.845486	-1.26151	0.301425	-0.986308	0.243179	-0.575549
USP9Y	-0.452885	-0.120069	-0.291903	-0.330754	1.7928	-0.745764	-0.585565	-0.447791	1.9277	-0.745764
LANCL3	1.48525	0.156685	0.139655	-1.20724	0.502175	-1.20724	0.274155	-1.20724	-0.329661	1.39345
LZTS2	-1.60487	0.161069	0.384989	-1.22036	-0.246475	-0.884169	0.642866	0.192518	1.56494	1.0095
TFCP2	0.559031	-0.833281	-0.7047	0.0894945	0.17492	0.356721	-2.15163	0.656071	0.400752	1.45262
WDR72	-0.529254	-0.46864	-0.812617	-0.405779	0.498178	-0.812617	-0.142555	-0.812617	1.81475	1.67115
CREB1	-0.507281	-0.380861	-0.636153	0.185679	-0.603775	0.292717	2.05962	-0.968466	-0.80984	1.36836
TSEN2	-1.43706	-0.397396	0.0341023	0.0119789	0.808544	1.80511	-0.968145	0.162351	0.96484	-0.984321
TMSB10	0.00993979	1.46041	-0.119758	-1.09612	0.919931	-2.06751	0.468946	-0.0291266	0.548275	-0.094992
TECTA	1.4851	-0.462213	-0.0114356	-0.870028	-0.663151	-0.550258	0.648874	-1.10316	-0.304213	1.83048
FBXO36	-0.173112	-0.599442	0.181808	-0.560099	1.24853	-2.13092	0.628674	0.329334	-0.198097	1.27333
ZNF345	-0.652609	-0.930559	0.304351	0.31632	-0.225428	2.56402	-0.471415	0.167003	-0.717602	-0.354083
PPP1CB	0.527141	0.567328	-1.48074	0.0284598	0.411235	-0.185522	2.04323	-1.14015	-0.725645	-0.0453383
MORN3	0.491021	1.0635	0.0623804	-1.34638	1.06643	-1.34638	0.534548	-1.34638	-0.0506493	0.871895
CD96	-0.409132	1.98581	0.716537	0.491282	1.0392	-0.874788	-1.00951	-0.704608	-0.692377	-0.542412
ANKRD20A11P	0.600112	-0.0319429	-0.55703	-0.722337	-0.313663	-0.976176	1.53786	-0.976176	-0.376155	1.8155
AGPAT5	-0.448637	-0.0514197	0.02356	-0.704942	-0.803704	-0.403531	2.30085	-1.0416	1.05112	0.0783039
MAPK15	0.38849	-0.705226	-0.484944	-0.0481032	0.427085	-1.48018	1.01558	-0.911749	-0.163476	1.96253
JAGN1	-1.56427	0.16981	0.563052	0.847132	0.277637	-1.68299	-0.137138	0.660392	1.36855	-0.502172
ACVR2B	-1.65514	-0.986676	-0.788235	-0.440538	1.24599	0.13157	1.06092	0.39133	1.25574	-0.214964
TSPEAR-AS2	0.255794	-0.430877	-0.156886	-0.828734	-0.60382	-0.828734	1.98364	-0.0963159	-0.828734	1.53467
INSIG1	-0.714284	-0.47953	0.595257	-1.58597	1.48337	-0.0325876	0.00545726	1.20137	0.667213	-1.14029
ELP3	-0.750347	-0.328835	0.314027	-0.0734452	-1.3664	-0.6056	2.12153	0.830843	0.557528	-0.699296
STAG1	0.0110043	-1.45079	-0.607017	-0.418313	-0.231998	0.990366	1.5353	-1.34401	0.706836	0.808622
CD79A	-0.677415	0.743589	1.59804	0.205295	1.53642	-1.20923	-0.972122	-0.250453	-0.278136	-0.695976
C3ORF18	0.736437	0.632241	0.646584	-0.858581	0.950102	-1.70216	-0.349119	-1.00871	1.34521	-0.392003
OIP5-AS1	0.957366	0.309396	0.788824	0.0841884	-1.37806	0.457769	0.884822	-2.0502	0.334953	-0.389057
CCSER2	-1.01411	0.870156	-0.243619	0.953028	0.506837	-0.476941	-1.1099	1.15405	0.903822	-1.54332
KLC4	-1.32413	-0.116644	0.324332	0.958839	-0.944206	2.1456	-0.00760129	-0.422054	-0.723366	0.109226
STARD10	-0.660082	0.654384	0.397294	0.143775	0.573479	-2.18391	-0.662278	1.46155	0.488923	-0.213126
ZNRF1	-1.95411	-0.552794	-0.0911067	0.0983735	-0.662813	1.24754	-0.0452885	-0.347318	1.35026	0.957257
PHF8	2.54674	-0.108694	0.12055	-0.217461	-0.510953	0.015756	-0.234725	-0.929774	-1.05745	0.376014
LOC101928000	0.305025	-1.24911	-1.24911	1.87762	0.255893	-1.24911	0.428404	0.332785	-0.0352438	0.582845
SYN2	-0.393817	0.257595	-0.789575	-0.789575	-0.321204	-0.789575	1.58959	-0.789575	0.118011	1.90813
TRMT112	1.02103	0.595462	0.286431	0.432045	-2.35135	-0.633729	0.691587	-0.442071	0.770296	-0.369694
RNF219	-1.37281	-1.02368	0.505372	-0.373681	-1.56827	1.17611	0.471959	0.804545	0.631589	0.748868
FAXC	-0.596823	-0.19556	-0.377446	0.15075	0.400741	-1.49899	-0.109488	1.28372	1.87301	-0.929905
PRRC2B	-0.26567	-0.832007	-0.548776	-0.486432	-1.64524	1.02284	0.987833	-0.540757	1.06972	1.23848
ABCE1	-0.175834	-1.32972	-1.2849	-0.211047	0.324738	0.773882	1.46461	1.28377	0.147564	-0.993055
CCDC34	-0.445333	-0.923921	-1.45519	-0.140092	-0.463865	0.560621	1.95695	-0.147451	-0.130403	1.18869
TXNDC5	-1.41297	0.0128464	0.482099	-0.231295	-0.0899221	2.20937	-1.14409	-0.489294	0.50446	0.158788
TMEM184A	-0.853502	-0.853502	2.31535	-0.0529607	0.647455	-0.853502	-0.853502	-0.0546754	0.0109548	0.547883
PLCXD2	-0.802319	1.74788	1.44455	-1.3274	0.231655	0.607193	-0.566781	-0.667156	-0.476936	-0.19068
TADA2B	-0.215858	0.301274	0.841867	-0.206454	-1.88525	0.569898	-0.588876	1.1376	1.16096	-1.11516
TMCC3	2.17214	0.950526	0.173088	-1.01326	-0.833258	0.133179	-0.478316	0.169304	-0.116418	-1.15699
PTDSS2	0.350236	0.161336	-0.416156	1.49522	0.459508	0.0825095	-1.17193	-2.0148	0.870618	0.183462
DNAJC28	-0.873985	0.458126	-0.928415	0.635319	-0.0163283	1.85234	-1.3745	1.02871	-0.586277	-0.194989
PLA2G4B	0.580379	0.970715	0.65363	-1.30842	-1.30842	1.38522	0.312266	-1.30842	-0.254134	0.277174
KLHL12	1.17158	-1.19199	-1.02416	-0.16031	-0.595744	-0.191393	-0.160158	2.1581	-0.172309	0.166376
MAJIN	-0.874978	0.80399	0.312643	-0.874978	0.389034	-0.874978	1.71777	-0.874978	-0.874978	1.15145
CASP8AP2	-0.888294	-0.65884	-0.482079	-1.10974	0.163434	0.712645	0.823549	2.07602	-0.860382	0.22369
CAV2	0.73102	1.13229	0.0395846	0.789395	-0.303052	0.22565	-1.64014	0.652429	0.180511	-1.80769
YIF1B	-0.297318	0.150034	0.978051	1.11378	0.578244	-1.31501	-0.337353	-0.100377	1.0655	-1.83555
LOC646471	-0.680198	-0.0787401	-0.121234	-1.46391	0.979857	-0.162653	0.503184	1.77277	-1.2993	0.550217
SLC39A6	-1.42537	-0.269477	-0.209681	0.225991	-0.216612	0.165067	-0.0345943	1.76751	1.34045	-1.34329
PDXK	0.407885	1.0297	0.854575	0.104519	-0.411714	0.0586873	-2.29336	0.309151	0.83698	-0.89642
FRMD6-AS1	-2.06972	-0.188708	-0.212195	-0.489109	0.507381	0.508473	0.79709	1.70705	0.014904	-0.575168
CLUHP3	-1.12397	0.255078	1.17857	-1.12397	-1.12397	0.755802	0.594856	-1.12397	0.628976	1.08258
EPS8L1	0.250813	-0.433127	-0.524501	-0.333844	-0.106633	2.14959	-0.993261	-1.26402	1.05119	0.20379
LRRC45	0.485712	-0.565909	0.737101	-0.574975	0.667235	-2.18406	-0.623392	0.0972185	1.11024	0.850827
OGDHL	-0.11254	0.261225	0.861547	-0.95397	-0.025135	-1.372	1.48514	-1.07564	-0.4252	1.35658
ZC3H11A	-0.655616	-0.730753	-0.504473	-1.10053	-0.580045	-0.087782	0.797025	2.1532	-0.238608	0.947584
LOC105371814	0.304476	-0.95025	-0.95025	-0.95025	-0.0892077	-0.95025	0.00999081	1.85369	0.431815	1.29024
CGN	0.381463	-0.64519	0.740627	1.12483	1.19333	-2.12026	0.0592853	-0.824358	0.139352	-0.0490822
ZBTB25	-0.25658	1.32486	0.864878	0.0710447	0.540767	0.331643	-1.02257	-0.464668	0.68312	-2.07249
GDAP2	-1.23358	-0.127917	-0.247431	1.13436	-0.485143	-0.896082	0.117973	2.2132	-0.0789092	-0.396473
GPR179	-0.326999	-0.334387	0.0949186	-0.788995	-1.01043	1.58052	0.309978	-1.46566	0.469216	1.47184
CD207	-1.3353	-0.323473	-0.607867	-1.32452	0.00959558	0.345252	1.00404	0.293355	-0.00401781	1.94294
ANO2	-0.226088	-0.0461793	-0.235889	-0.517179	-0.178467	-1.5505	1.9487	-0.221228	-0.438986	1.46582
ABI3BP	-0.137869	0.513194	0.819793	-1.24514	1.50529	1.44933	-0.636141	-0.718131	-0.832584	-0.717741
NAB1	0.327541	-0.057563	-1.61638	-1.00088	-0.895106	1.25756	1.43508	-0.0478372	-0.272176	0.869766
TPM4	-2.10276	0.867105	0.499967	-0.0824839	1.38076	0.195507	0.259169	0.37218	-0.218244	-1.1712
CXORF38	1.41483	0.927843	0.199786	-0.0562044	0.563046	-0.68718	-1.90316	0.788337	-0.247034	-1.00026
MBD4	1.13601	0.292585	-0.00741978	-1.5272	0.724247	-0.447136	-1.29255	-0.895014	1.18457	0.83191
CCDC58	0.419622	-1.47646	-0.723789	-0.303459	-0.136683	-1.26665	1.7008	0.378468	0.269596	1.13855
CDKL3	0.648642	-0.710362	-0.331792	-0.925891	-1.23632	0.931664	0.547552	1.82666	-1.00474	0.254576
SNORA79B	-1.91157	1.41214	0.792058	0.384307	-0.0434862	-0.204863	0.451111	-0.606949	0.844388	-1.11713
FAM43B	0.244416	-0.652666	0.111215	-0.652666	-0.652666	-0.652666	1.64987	-0.652666	-0.652666	1.91049
ASIC1	-1.34133	-0.239783	-1.10867	0.52232	-1.00018	0.992069	1.06307	-0.587108	0.242506	1.45711
MRPL4	1.69755	0.0332963	0.539067	0.364465	-0.213972	0.708649	-1.07584	-0.688821	0.454268	-1.81866
ZNF664	0.144922	-0.630329	-1.30453	-0.589058	-0.955293	0.304714	2.12341	0.576369	-0.397241	0.727046
ELMOD3	0.0579256	0.465755	-0.302815	-0.0971429	-0.504495	1.47399	-1.95489	1.1052	0.645932	-0.889455
ZNF333	1.64571	-0.659809	0.149848	-1.58872	-0.547839	1.4367	0.243237	-0.913607	0.00710652	0.227381
PRPF8	0.983377	1.48453	-0.408661	-0.371423	-0.483093	-1.32887	1.52563	0.0674067	-0.973175	-0.495725
TMEM191A	-0.246005	0.615322	-0.086781	0.103077	0.886543	-1.04711	-1.04711	-0.231695	2.10088	-1.04711
UBE2DNL	2.84605	-0.316228	-0.316228	-0.316228	-0.316228	-0.316228	-0.316228	-0.316228	-0.316228	-0.316228
SEMA3F	-1.62968	-1.20934	0.637594	1.09459	0.282618	-0.473962	0.246593	-0.259317	-0.340836	1.65174
RIT1	0.150663	0.232952	0.311304	0.107212	0.127293	-2.646	-0.228901	0.933087	0.0809694	0.931415
TTC4	0.224756	-0.416142	-1.96414	0.267847	-0.0240233	2.13437	0.395133	-0.137138	-0.248577	-0.232086
ZNF56	-1.09881	1.06536	1.03901	-1.09881	-0.0888877	0.63639	0.979938	-1.09881	-1.09881	0.763417
ACSF2	0.52611	-0.429282	0.451844	1.15929	-0.353137	1.06701	-1.87953	-0.701235	-0.839933	0.99886
MMP16	0.633885	-0.846343	-0.643948	-0.804631	-0.631762	-0.123723	1.72089	0.0314882	-0.937252	1.60139
POFUT2	2.41366	0.107565	-0.590542	-1.17123	-0.377618	0.555469	-0.482684	-0.362482	-0.603913	0.511779
ATRX	0.848401	0.20389	0.347342	-0.370277	0.352241	0.476932	0.18153	-2.5685	-0.391356	0.919799
KIAA0895	-0.291523	0.460586	-0.956302	-0.792223	0.294549	-1.38695	0.0475269	2.24281	0.0405552	0.340974
POU5F1P5	0.158388	0.106486	0.388199	0.788714	0.829737	-2.37367	0.0208813	-1.08488	0.656119	0.510027
ROCK1	-1.33054	-0.596874	-1.25139	-0.295546	0.560158	0.243688	1.15829	1.83996	-0.345705	0.0179559
OXTR	-0.110863	-1.75275	-0.351348	1.05098	-0.368984	0.588772	1.64514	-0.56071	-0.836287	0.696051
SRCAP	-0.391484	-0.0164911	-0.033921	1.21537	-1.11757	0.279268	0.46809	-1.71569	-0.348107	1.66054
LOC100506497	-0.55448	-0.55448	-0.55448	-0.55448	-0.55448	2.12432	1.50761	-0.55448	-0.55448	0.249425
ARHGEF26	1.14945	-0.66216	-1.41576	-1.27911	-0.683868	-0.147428	1.07529	0.00114431	0.861672	1.10076
ZRANB2	1.18182	-0.44541	-0.904121	0.198035	-1.42275	1.51771	0.431167	0.384009	-1.32023	0.379769
GNS	-0.660912	1.93259	0.396144	1.03273	-0.585673	-1.11107	-0.550237	-0.104375	0.734452	-1.08365
KCNA6	0.578426	-0.21642	-0.542	-1.11225	-0.879915	1.16937	0.98478	-0.76764	-0.847814	1.63346
VIPR1	0.0757558	0.632128	1.0122	0.970959	1.3517	-1.4179	-0.745113	-1.4179	0.0115143	-0.473352
PCDHGB8P	0.680161	-1.73066	1.12353	0.0197397	-1.41011	0.617007	-0.579738	0.529691	-0.336211	1.08659
LOC101927267	-0.146916	1.16204	0.0414455	1.84395	0.0269695	-1.09463	-1.09463	-1.09463	-0.354412	0.710804
FAM20A	1.03868	0.150397	0.688623	-1.14456	0.752029	-1.30689	0.860481	-0.845688	-1.18432	0.991243
ZNF805	-0.39387	1.00293	1.43228	-0.329047	-0.466475	-1.56123	-0.321429	-0.0203868	1.49149	-0.834254
PERP	-2.28895	-0.278031	-0.147688	0.181913	0.661121	1.49379	0.278934	0.779136	-0.192153	-0.488074
LINC00641	-1.59353	0.0967608	1.09215	-0.499895	-0.0153418	1.18771	-0.250082	1.47494	-0.395878	-1.09683
A4GALT	-0.314382	0.218257	0.804131	-0.147391	0.771184	-2.06559	1.35156	-0.676587	-0.690856	0.749679
C3ORF67	0.0608317	0.509144	0.720685	0.151396	0.603699	-0.470137	0.790648	-2.63571	0.11335	0.156088
TMLHE	2.53942	-0.450858	0.77229	-0.0460908	-0.242124	-0.55182	-0.851184	-0.759056	-0.231741	-0.17884
SLC2A11	-1.49753	0.203428	0.5413	-0.847079	-0.442802	-0.907698	0.721263	0.867676	-0.434093	1.79554
LIX1L	-0.990531	1.28278	0.43953	0.684205	-0.192048	-1.8766	0.104676	0.1581	1.20527	-0.815383
RBBP9	-1.18713	1.60493	0.166299	0.332056	-0.842265	-0.840156	-0.282084	-1.01855	1.35648	0.710416
BICDL2	-0.769643	-0.769643	2.05707	-0.769643	1.01003	0.882129	-0.00989323	-0.769643	-0.769643	-0.0911187
RIDA	-0.0966362	0.166794	-0.302356	0.546428	-1.28747	-1.53373	1.53569	1.1103	-0.76311	0.624091
C8ORF89	-0.723635	-0.723635	1.50749	1.17821	0.185382	-0.723635	-0.723635	-0.723635	-0.723635	1.47073
LAMC2	-0.726216	0.361051	1.17089	-0.918733	0.684333	1.99316	-0.489272	-0.774385	-0.627209	-0.673616
MIR301A	0.165052	-1.31216	-1.31216	0.52444	-0.296016	-1.31216	0.779398	1.24538	0.500398	1.01783
VTA1	-0.59131	-1.0589	-0.363184	1.56965	0.141639	-1.13837	0.96925	1.47079	-0.41251	-0.58705
TTPA	0.166614	-0.666159	-1.17073	-1.3796	-0.888239	0.591863	1.16833	1.43942	-0.0811243	0.819626
RTL5	1.85508	0.304224	-0.619015	-1.02206	-0.374387	-0.201438	0.443075	-0.976881	-0.829488	1.42089
FAM103A1	0.554742	0.930184	-0.670538	-0.04853	-0.783125	0.458643	-0.573513	2.02479	-0.539128	-1.35353
EPB41L5	1.22025	-1.41876	-1.55172	-0.158197	-0.0316762	0.129785	0.578609	0.310153	-0.586075	1.50763
ZNF583	-0.113431	-1.42031	0.487336	-0.415681	-0.953765	-0.544234	-0.193503	2.19171	0.639157	0.322712
PAPOLA	-1.53086	0.0873062	-1.29414	0.456797	0.60805	1.39894	0.490172	0.689074	0.357791	-1.26314
UBE2E2	-0.124795	0.407355	0.420674	1.09297	0.56776	-0.410558	1.0614	-1.52761	-1.83676	0.349567
HDAC1	-0.461225	-0.335249	-1.43279	0.949846	-0.323573	0.731938	1.78458	-1.29372	0.462712	-0.0825151
TPCN1	1.36096	0.450837	-0.593839	1.46677	0.263335	0.335974	-0.956952	-0.560685	-0.0264356	-1.73996
EFCC1	-0.233873	-0.184635	0.0762135	-0.493895	0.451043	0.924543	-1.1883	-1.1883	2.16188	-0.324667
HOXB13	0.0547669	-0.615796	0.0935106	-2.4011	0.32566	0.423843	0.98198	-0.216878	0.115718	1.23829
SMYD2	0.157401	0.186096	-0.285668	-0.0897164	-0.0204565	0.603479	0.562513	-2.64477	0.804014	0.727105
TMEM39A	1.61706	-0.350814	0.329534	-0.502849	-1.98196	-0.893897	0.522084	0.286926	0.0720872	0.901821
NISCH	-1.63644	-0.695462	0.352527	0.0405892	-0.413098	1.57395	-0.35889	-0.188979	1.66816	-0.342357
MRPL41	0.824621	-0.765016	0.727467	0.396668	0.478572	0.375586	-1.57724	-0.376943	1.38026	-1.46397
ADHFE1	-0.933041	0.192941	0.317033	1.33504	-1.34785	1.63415	-0.22297	0.555164	-0.454454	-1.076
INPP5J	-1.36198	-0.347096	1.24186	-1.34413	1.59666	-0.781891	0.539827	-0.140422	0.41155	0.185621
GPR158	0.882978	0.283745	0.638831	-0.241779	-0.162791	-1.7492	0.498375	0.816413	-1.7492	0.782621
ZNF331	-0.30512	1.10646	0.374132	-1.08442	-2.05958	-0.261704	0.528528	1.05593	-0.153315	0.799077
PIP4K2B	0.290004	-1.31258	-0.613491	-0.0733408	-1.7802	0.857451	1.02615	0.236964	1.34052	0.0285267
AATF	1.44546	-0.800311	-0.0904726	0.54744	-0.663424	0.137465	0.380076	1.34614	-0.481785	-1.82059
LOC645752	2.3226	0.220349	-0.142603	-0.778309	-0.412817	1.10532	-0.778309	-0.237574	-0.778309	-0.520347
ANGPT1	0.764601	-0.641469	-0.630439	-0.508517	-0.393435	0.0305533	2.20653	-0.430809	-1.21314	0.816124
CCL2	-0.620898	-0.780718	1.78991	0.917273	0.811097	0.117163	-0.618802	0.596698	-1.33322	-0.878495
CCDC12	-1.91763	-0.491434	0.833167	-0.128358	1.82024	0.00551469	0.0554187	0.368094	0.348042	-0.893053
RPL23A	0.0332832	-0.11687	-0.376685	-0.822302	-0.220792	-0.669652	2.28278	-0.877884	-0.450568	1.21869
FGFR1	-1.22756	-0.852351	-0.106445	-0.252103	0.217493	0.225371	1.97697	-0.379062	-0.91076	1.30844
DDX31	-1.36554	-1.32948	-0.482052	0.0328162	-1.12731	0.932869	0.600664	0.864796	1.19165	0.681582
MAMLD1	1.01218	0.404349	0.640578	0.00429333	-0.196103	0.752365	-1.70748	1.2217	-0.824423	-1.30745
PTGER3	-0.508863	-0.837071	-1.62981	0.940684	1.27195	1.50389	0.179909	-0.694192	0.0864323	-0.312926
AIFM1	1.90087	-0.525914	0.282914	-0.0972407	1.21833	0.265912	-1.55468	-0.0937834	-0.878168	-0.518242
LOC105379514	-0.799466	0.711343	0.0837159	-0.799466	0.203366	0.885788	-0.799466	2.11312	-0.799466	-0.799466
DPY30	0.299214	0.798871	-0.862617	-0.122129	-0.0375209	-2.15261	1.50811	-0.283843	0.143628	0.7089
DLL1	-0.945968	-0.264808	2.46606	0.482583	0.216488	-0.198244	-0.827505	-0.700585	-0.579277	0.351258
SLC39A9	-0.406432	0.106782	-0.211718	1.37951	0.672354	0.999479	-1.31275	-0.599454	0.940067	-1.56784
PLEKHG4B	-0.413134	-0.416748	-0.25557	-0.245406	-0.233497	-0.983775	1.71164	-0.642608	-0.499654	1.97875
DRG1	-1.4252	-0.197	0.0390934	-1.45415	-0.0502975	0.932985	1.49475	1.1356	-0.627677	0.151897
S1PR5	-1.22181	-0.269922	-0.298294	1.20228	0.00964783	1.22655	-0.79204	1.60482	-0.480668	-0.980568
ZNF733P	-0.496552	-0.496552	-0.496552	-0.496552	-0.496552	-0.496552	0.262583	-0.496552	0.596063	2.61722
FRMPD2	-0.316228	2.84605	-0.316228	-0.316228	-0.316228	-0.316228	-0.316228	-0.316228	-0.316228	-0.316228
ZBTB26	-0.694943	-0.575641	-0.391256	-1.11312	-0.98301	1.74446	0.706082	1.01561	-0.632405	0.924216
NID2	-1.23905	-2.02112	-0.0162654	0.627747	0.706771	0.393304	1.12277	-0.391402	-0.131523	0.948768
FRMD7	1.87991	0.322033	0.722471	-0.711296	1.34336	-0.711296	-0.711296	-0.711296	-0.711296	-0.711296
SCUBE1	-0.360034	0.051424	-0.512768	-0.566647	-0.559024	-0.881394	1.8503	-0.520359	-0.34098	1.83948
GCNT2	-0.474406	-0.0343345	0.451085	0.613058	0.482738	1.17574	-2.00127	0.271677	0.849388	-1.33368
CD160	-1.15158	1.65593	1.02345	0.371812	-0.124078	-1.15158	-1.15158	0.978659	-0.322844	-0.128192
GCN1	0.174274	-0.528852	-0.227808	-0.729517	-1.30369	0.967399	2.22686	-0.55441	-0.33134	0.307087
MED16	1.96819	-0.245233	1.37515	-0.324693	-1.10529	-0.416785	-0.729796	0.245291	0.24406	-1.0109
PLEKHG1	-0.37222	-0.347921	-0.456845	1.4491	1.85431	0.345863	-1.0867	-1.22676	-0.375401	0.216575
ATL1	-1.41068	1.72345	-0.31804	-1.00387	0.330183	-1.22441	0.329893	0.520829	0.0856155	0.967041
CFAP43	-0.186318	1.12605	-0.27429	-0.226603	0.0269539	-2.22763	1.11316	-0.441066	0.00626878	1.08348
WASHC5	-0.448088	-0.403971	-1.54447	2.19674	-0.182732	-0.286584	0.620275	0.158117	-0.72313	0.613846
PLEKHB1	1.75508	-0.119763	1.26353	-0.594112	0.0500589	0.105128	-1.54437	0.616062	-0.716893	-0.814723
RER1	0.951979	-0.714915	-0.870038	0.252736	-0.585154	-0.1089	-0.372391	2.38528	-0.205825	-0.732768
ARHGAP44	-1.24362	-0.658619	-0.358722	-0.706133	-0.257191	1.45693	1.26587	-0.710509	-0.219182	1.43117
LOC100310756	-0.731741	1.90001	0.316048	-0.296868	1.14926	-1.72974	0.11665	0.0133619	-0.183653	-0.553338
FAM96A	1.31293	0.65698	-0.117339	-0.575102	1.23282	1.0377	-0.913406	-0.563145	-1.58642	-0.485018
WSCD2	-0.555332	1.16583	-0.555332	-0.555332	0.417663	-0.555332	-0.555332	-0.555332	-0.555332	2.30383
CCDC186	-0.841615	0.493819	-1.02726	-1.0017	0.382495	-0.238624	0.811775	1.26048	-1.24732	1.40795
SPTAN1	-1.74689	-0.211174	-0.5647	0.292215	1.0931	0.127126	-0.602757	-0.884015	1.13468	1.36242
PRR12	-0.434377	-0.0957292	0.625894	-0.636426	-1.01561	0.357273	0.886732	-1.83922	0.649799	1.50166
SAGE1	-0.460144	-0.460144	1.32545	-0.460144	-0.460144	-0.460144	-0.460144	2.3557	-0.460144	-0.460144
LOC441204	-0.00966473	-0.831134	0.12046	-1.84567	-0.347433	1.99213	-0.069246	0.345164	0.805737	-0.160345
FAHD2B	0.52312	0.667376	-1.04637	-2.05666	0.983953	0.994447	-0.87604	0.208439	0.360817	0.240916
KCTD10	-0.379978	0.258837	-0.473982	0.89029	1.77318	-0.2964	-0.163559	-0.461055	0.775739	-1.92308
GDPD3	1.5282	-0.333657	-0.905773	0.439262	-0.808039	0.0983337	-0.134691	-1.75871	0.873729	1.00134
RAD51AP2	-0.44406	-0.44406	-0.44406	-0.44406	-0.44406	-0.44406	1.03045	-0.44406	-0.44406	2.52204
FAM72C	0.421714	-1.47221	-0.499678	-0.422949	-0.605103	-1.08791	1.68513	1.2425	0.268458	0.470048
ENTPD2	0.0625621	-0.959433	1.13555	-0.959433	0.0302527	-0.959433	-0.959433	0.0808172	0.623831	1.90472
CNTNAP3B	0.744236	-0.339046	0.470607	0.173615	-1.26953	-1.50018	0.78328	-1.09493	0.603341	1.4286
SH3BP4	-1.14996	-0.942027	0.869147	1.30419	1.04917	-0.36332	-0.308541	-0.748893	1.24122	-0.950998
PRDM8	-0.756607	0.657235	1.15394	0.205227	0.637585	1.26409	-0.611601	-1.90562	-0.771826	0.127582
THOC1	-0.579169	-0.345648	-0.966264	-0.947996	-0.2503	1.1022	2.14173	-0.610218	-0.203462	0.659123
MS4A14	-0.439575	0.956065	0.23719	-0.102424	-0.0530275	1.94954	-1.4423	0.62468	-1.03135	-0.698796
LINC02466	-0.473449	-0.473449	-0.473449	-0.473449	-0.473449	-0.473449	2.02386	-0.473449	-0.473449	1.76374
MGLL	0.592811	-0.885311	0.377301	-0.48187	0.886568	0.0286781	1.08691	-1.99408	-0.662826	1.05182
COQ9	1.78177	0.000473863	0.785611	0.392793	-0.0769418	0.433761	-0.595009	-1.33839	-1.62921	0.245139
KCNE1	1.5676	-0.0418743	0.371825	-1.10942	-0.0686369	-1.10942	1.62859	-0.214286	-1.10942	0.0850565
PLA2G4A	0.159543	1.27539	0.315535	-2.40041	0.63751	0.200899	-0.0663782	0.780203	-0.35258	-0.549717
A3GALT2	0.710569	-1.34307	0.73993	-1.34307	0.898168	-1.34307	0.130925	1.23243	-0.108812	0.426015
ZNHIT1	2.42775	0.181739	-0.088283	0.16869	0.117181	0.249154	-1.24689	-0.786434	-0.87515	-0.147762
VPS28	0.483444	0.938577	0.214046	1.0476	-1.67036	-0.179083	0.425067	-1.86426	0.101548	0.503426
CIRBP	0.0395587	0.00358596	1.80788	-0.689016	0.38612	1.01559	0.265504	-1.26332	-0.014093	-1.5518
ANO4	1.05407	-0.0115876	0.778494	-1.48332	0.575753	-1.06495	1.12855	-1.48383	0.172474	0.334347
LAT	1.18277	0.906081	0.0171729	-0.31931	-0.167173	0.332108	-1.12339	-2.10697	0.741152	0.537557
TDRD3	-0.851001	1.82314	1.45384	-1.5305	0.0661347	0.232319	-0.203134	-0.217633	-0.228412	-0.544751
AXIN2	-1.05402	0.373683	-0.205907	1.19172	0.274582	-0.471589	0.349983	0.660049	-2.10931	0.990803
TTC23	0.835165	0.889652	0.261944	-0.373694	-0.585882	1.46906	-0.367474	-1.77104	-1.03494	0.677217
RLN1	0.993339	0.626597	-1.66971	1.04623	0.162147	-1.66971	0.824371	0.25574	-0.192218	-0.376796
GABRA1	0.288583	-0.561548	-0.561548	-0.561548	-0.561548	-0.561548	2.01652	-0.561548	-0.561548	1.62573
KCNMA1	-1.05835	0.85767	0.371404	-0.115584	-0.205941	0.869506	1.88592	-0.650828	-1.36781	-0.585985
KTN1	-0.873322	-0.242208	-1.69905	0.312648	0.901085	-0.358059	0.329222	1.8975	0.370685	-0.638497
HIST1H2AD	0.639653	-1.07252	0.979953	-1.07252	1.53238	-1.07252	0.775577	-1.07252	0.264783	0.097718
LINC00681	0.126514	1.874	1.0041	0.15249	-1.18122	0.364369	-1.18122	-0.235696	0.257869	-1.18122
KDM8	-1.10652	0.0646048	0.653988	-0.358234	0.396106	-1.301	0.7249	-0.551997	-0.573038	2.05119
TP53INP1	-0.906195	1.2674	-0.32097	1.75837	-0.239238	-1.77687	-0.282377	0.174855	0.159308	0.16572
WHRN	0.0890078	0.962811	0.710036	-0.0142376	0.680809	-0.131796	-1.81302	-0.388078	1.30087	-1.3964
COQ3	0.0422787	-0.901946	0.499319	-1.20351	0.795233	0.346933	-0.403671	2.05189	-0.0615217	-1.165
IGIP	-0.522277	0.533636	0.819997	-0.184142	-0.568656	1.65323	-1.36996	1.22659	-0.658628	-0.929794
TJP1	1.37392	-0.829115	-0.648004	-0.14601	0.612755	1.68048	-0.917704	-0.207756	-1.31863	0.400067
MIR3911	-0.68343	1.33851	-0.433653	-0.3141	-0.309527	-1.04843	0.196779	2.17437	-0.646387	-0.274142
CELF2	-0.100432	0.88763	-0.173294	1.52427	0.993953	-1.88924	-0.767307	0.121785	0.206005	-0.803369
CTDSP2	1.21131	0.683032	-0.568245	-0.73513	-0.793319	0.0548747	1.73872	-1.5738	-0.196314	0.178869
LCT	-0.183787	0.0297794	0.0146468	-1.18217	0.478276	-1.18217	1.9262	0.56161	-1.18217	0.719797
PEX1	2.34047	0.111238	0.19413	-1.34827	-0.363172	0.393322	0.105315	0.170473	-0.65693	-0.946573
NLRP2B	0.749813	-0.594775	-0.594775	-0.594775	-0.594775	-0.594775	1.44689	-0.594775	-0.594775	1.96672
RIMBP3	-0.793155	0.338893	1.09089	-0.298304	-0.297987	-1.78936	-0.716339	1.07021	1.42376	-0.0286109
ARRDC5	0.235261	1.73018	0.956473	0.120564	0.882716	-1.50035	-1.1569	-0.247995	-0.320946	-0.699
LINC00900	0.432591	-0.796931	0.993394	-0.796931	0.0488322	-0.796931	2.12051	-0.796931	-0.796931	0.389324
EXOSC10	0.108393	-0.697562	-1.95892	0.671947	-0.582974	0.587202	1.50155	-0.485384	-0.151668	1.00742
LOC730234	0.291074	0.221478	-0.324191	0.0288796	-0.18634	2.481	-0.396179	-0.0201858	-1.37732	-0.718214
PCP2	-1.06347	1.21714	-1.06347	1.08129	0.653489	-1.06347	-1.06347	0.30872	1.13296	-0.139698
MET	0.700954	1.29745	0.321878	-0.816506	-0.542454	-1.77726	-0.561378	1.33833	0.517001	-0.478023
PPWD1	-0.153125	0.267881	0.966649	-0.201956	-0.989814	2.27779	-0.229969	-1.09739	-0.695281	-0.144787
CACUL1	-1.96876	0.519432	-1.10991	0.486194	0.475577	-1.11899	0.54667	0.868127	0.58792	0.71374
MAST1	-0.426851	-0.254891	-0.976844	0.700618	-0.0433254	-1.65814	0.694825	-0.672258	1.049	1.58787
GPRASP1	1.59229	-0.408137	0.932245	-1.13749	-0.730451	-1.19039	0.0951051	-0.308399	-0.262937	1.41816
PKHD1	0.804576	-1.08311	0.854163	0.650611	0.0899302	-1.39908	0.580947	-0.764657	-1.11237	1.37898
MIR1304	-1.10544	0.676418	1.36693	0.391852	-1.10544	-1.10544	0.478956	0.388645	-1.10544	1.11894
CLCN3	-0.111504	-0.010891	-1.39344	-0.0097425	-0.406822	1.22869	-0.28883	1.98808	0.149938	-1.14548
TULP3	-0.0166133	0.773414	-0.1001	1.14338	-2.21466	0.368259	-0.837933	0.415258	0.962278	-0.493289
ATCAY	-0.300682	-0.527321	-0.527321	-0.527321	-0.307847	-0.527321	1.76232	-0.527321	-0.527321	2.01014
P3H3	-1.44383	0.368232	0.52444	-1.24815	-1.0253	-0.400699	1.02008	0.0628409	0.626412	1.51597
SNORD134	-1.2774	-1.2774	0.885594	0.0325312	-0.0338115	-1.2774	0.415751	0.0297254	1.33338	1.16903
CSDE1	-0.558233	-0.197279	-0.160654	1.04536	-1.23708	-0.415685	1.76781	0.960808	-1.32824	0.12319
DIP2A-IT1	0.523533	-1.37811	-1.37811	1.35217	0.463414	-1.37811	0.6745	0.557501	0.107178	0.456042
PYGO2	0.087849	0.0396639	0.339229	0.16955	-0.698542	-2.51176	0.579806	0.343001	1.16685	0.484354
HEXDC	1.40607	1.32226	1.29253	-0.71128	-1.08621	0.0338536	-0.405343	-1.1003	-0.73611	-0.0154637
LMBR1L	-0.868205	1.66607	-0.562922	0.037853	-1.65744	-0.55731	0.323978	-0.224465	0.573547	1.2689
TUBGCP5	1.30351	0.0375212	0.154027	0.143867	1.78095	-1.06478	-0.589309	-1.49441	0.271829	-0.543193
HBG2	2.78269	-0.420965	-0.420965	-0.420965	-0.420965	-0.420965	-0.420965	0.0451905	-0.420965	0.118878
ELP1	-0.326136	-1.20662	-1.33145	-0.152424	0.200561	0.0729565	-0.484766	2.00478	1.15655	0.0665471
F7	-1.15438	-0.153849	-1.15438	-0.312026	-0.178619	1.10786	-1.15438	0.482871	0.925701	1.59119
MYO9B	-1.17042	0.309306	0.816862	0.083306	0.137981	1.3289	-1.25059	0.352739	0.961258	-1.56934
OPRL1	0.268296	0.912556	-0.662622	0.775421	-1.472	-1.06383	-0.176611	-0.836042	1.61941	0.635418
STARD6	-0.907454	-0.907454	-0.907454	0.288283	0.691076	-0.907454	1.07743	1.44602	-0.907454	1.03445
KCNA7	-0.913177	-0.913177	-0.913177	-0.913177	-0.913177	1.27312	0.505146	1.38187	0.534186	0.871566
GOLIM4	0.839248	-1.16523	-1.07054	-0.836566	0.0598754	0.40139	1.70594	-0.406458	-0.696658	1.16899
C9ORF139	-0.528924	1.64924	0.75812	-0.11427	0.898426	-1.48052	-1.48052	-0.117169	0.454091	-0.0384846
NIPAL1	-0.944118	-0.323335	-0.217551	-1.16521	-0.702266	1.69558	1.25188	-0.844196	0.916804	0.332413
FAM200B	-1.7447	-0.0929881	-0.58407	0.164087	-0.73338	1.10036	0.525035	1.84545	-0.109095	-0.370702
NDUFAF8	1.24734	-1.17465	-1.13916	0.312699	-0.193911	1.01224	0.672224	-1.21694	-0.642682	1.12285
MED8	0.757968	0.162523	-0.582619	1.11159	0.116687	-2.30381	0.61484	0.516568	-0.821544	0.427805
SCAF1	0.68979	-0.407481	1.58284	-0.451853	-1.30841	-0.571182	0.372158	-1.40048	0.303669	1.19095
LRRC49	0.375405	-0.42892	-0.191974	-1.40515	-0.0719766	-0.502386	1.64684	-1.09768	0.101367	1.57447
FAM118B	0.39821	-1.43812	-0.473177	0.0360031	0.0935374	-1.54578	-0.156291	1.82332	0.584908	0.67738
PTBP3	-1.49739	0.128824	-0.550814	0.606488	0.86115	-0.428151	-0.22258	1.47875	1.00309	-1.37937
CCDC151	0.840315	1.62873	-0.522181	-1.34045	-0.469547	1.54034	-0.191658	-0.845961	-0.423628	-0.21596
PELI3	-0.246639	-0.0676974	-0.000540378	-0.0924503	0.962648	-0.696466	-1.62041	0.47383	2.02859	-0.740865
D2HGDH	0.24367	-0.468574	0.882865	-0.253814	-0.180122	0.574972	-0.405592	-2.3147	1.23095	0.690348
RHOC	0.840103	-0.688323	0.4709	1.39644	-0.970614	-1.59439	-0.900741	0.521187	1.03424	-0.108807
SAP30BP	-0.626386	1.48715	0.709568	0.224174	-1.45996	-0.286348	-0.352322	1.61724	-0.540227	-0.772885
MTHFS	-0.518503	-2.18027	1.30097	-0.48579	-0.220406	1.26203	-0.122506	0.179366	0.554367	0.230744
SNORD13	-0.187249	0.0136999	1.19003	-1.26422	0.963873	-0.556237	0.0238256	-1.00009	1.70778	-0.891407
MIR1296	-1.17221	2.18653	0.122139	0.146829	-1.53701	0.525411	-0.382206	0.136042	-0.0636396	0.0381162
MAGEA1	2.36875	-0.652587	0.667132	0.470392	-0.652587	-0.652587	-0.652587	-0.652587	-0.652587	0.40925
CDK15	0.319558	-0.140283	-0.283513	1.85876	0.13691	1.31706	-1.26981	0.0365489	-0.876077	-1.09916
CPXM1	-0.953088	-1.04597	-0.0291056	-0.592305	0.194894	-0.566642	1.51066	-0.585151	0.159666	1.90705
RAC2	-0.350678	1.79789	1.11654	0.444483	0.652481	-1.24834	-0.987765	-0.490118	0.0636915	-0.998175
SNORA50A	0.389259	0.262764	0.675923	-0.975468	1.69734	0.868041	-0.91537	-0.310114	-1.67397	-0.0184049
LINC02028	0.226329	-0.879153	-0.879153	-0.879153	-0.879153	1.6906	1.1661	0.704672	0.608066	-0.879153
GGT8P	0.906524	-0.810848	0.505884	-0.810848	2.2748	-0.810848	0.0329678	-0.810848	-0.200254	-0.276534
ACAA2	-0.630572	1.36364	-1.60664	-0.551714	0.344505	0.606041	0.885789	0.848657	0.102591	-1.36229
METTL2B	2.14129	-0.17028	-0.748481	0.129972	-0.566608	-0.64199	1.07633	-1.0269	-0.746226	0.552898
DOLPP1	-0.853329	-0.872466	-1.01554	1.48848	-0.102668	-0.717359	0.705967	1.52203	-0.752692	0.597575
CAV1	0.768925	1.17199	0.311562	1.11515	0.0616047	-0.841951	-1.49575	0.210444	0.311497	-1.61347
PADI1	0.238479	0.415743	-0.590202	-0.590202	2.56441	-0.590202	-0.590202	-0.590202	0.32258	-0.590202
MIR614	0.309949	0.627418	1.59736	-1.19199	-0.459851	-1.19199	-1.19199	1.19217	0.243299	0.06561
LOC107984035	1.02989	-0.922672	1.41345	-0.922672	0.96869	-0.922672	-0.922672	0.48908	-0.922672	0.712244
CHST14	0.204638	0.251491	0.553007	0.0821098	0.257009	-2.19795	-0.0284726	-1.21836	1.0827	1.01382
CMA1	0.384996	-0.468624	-0.468624	-0.468624	2.69727	-0.468624	-0.468624	-0.468624	0.1981	-0.468624
HIST1H2AI	-1.45392	-1.34248	-0.674496	0.123039	0.790978	0.62193	1.33049	-0.863188	0.666497	0.801146
FAM173A	1.18156	0.281258	0.138019	0.01169	0.115666	-0.743872	-1.22697	-1.7367	1.46842	0.510936
FYCO1	-0.976407	0.294128	1.04254	0.298587	0.808106	-0.643287	-1.31266	0.41503	1.41886	-1.3449
LARS2	-1.30911	-0.324039	-0.221816	0.172469	1.45414	0.628683	-0.573234	0.33785	1.35561	-1.52056
MAL2	-0.56467	0.126912	0.115006	-0.894925	0.812073	-0.894925	1.62755	-0.894925	-0.894925	1.46283
CAPG	-0.959621	0.155824	-0.0567818	1.47559	1.25429	-1.16609	-0.288225	-1.03743	1.20235	-0.579899
SLC4A10	-0.8494	0.87623	0.147438	-0.8494	0.284566	-0.8494	-0.8494	-0.8494	1.7887	1.15007
FLJ46875	-1.24522	-0.16422	0.378031	0.390327	-1.56068	1.62615	1.3165	-0.00381943	-0.513903	-0.223179
ARHGEF1	0.232042	0.960025	1.27951	-0.723005	0.393075	0.696272	-1.55564	-1.39044	0.712169	-0.604013
PRRT2	-0.686784	1.24359	-0.488365	0.661161	0.747189	-1.6222	0.315779	-1.3767	0.159472	1.04686
NECAB3	1.92365	0.746223	-0.729646	0.420905	-0.751728	-0.687263	-1.27881	-0.818453	0.594004	0.581121
TNFAIP8	-0.694797	1.51162	1.1866	-0.33908	0.679304	-0.662974	0.845277	-0.0534974	-1.36742	-1.10503
SPRED1	0.0863615	-0.350454	0.096565	0.262885	-2.42068	-0.407855	1.11163	0.149387	0.275869	1.19629
DUSP9	-0.0895186	-0.142457	-1.37488	1.09872	-1.05429	0.624403	1.16201	-1.01154	-0.525249	1.31281
EFR3B	0.60935	0.891363	-0.359612	1.15234	-2.06283	-0.986418	1.02607	-0.187368	-0.210683	0.127789
POLK	1.33527	0.643161	0.650898	0.224893	0.00446644	0.202809	-1.28321	0.380761	-0.0389399	-2.12011
AK5	0.236605	-0.025674	-0.923498	-0.205722	0.0459358	0.22055	-0.940199	2.54152	-0.155915	-0.793607
C11ORF80	-0.857503	-1.12997	-0.573981	0.297647	2.33913	0.130454	-0.706232	0.674605	0.149829	-0.323982
LOC100507351	1.2264	-0.74336	-0.74336	-0.74336	-0.74336	-0.74336	-0.74336	0.680826	0.797835	1.7551
TAX1BP3	-1.35361	0.994674	0.965724	-1.35361	0.27605	0.937507	0.132715	-1.35361	0.779635	-0.0254734
ISPD	-0.993955	-0.466109	-1.13332	-0.637367	0.629296	1.57418	1.00638	0.190929	-1.12578	0.955746
ESPNL	-0.848202	0.0681479	0.0567062	-0.848202	0.181188	-0.848202	0.756303	-0.848202	-0.0167174	2.34718
MAK16	-0.687115	-0.428815	0.108561	-0.523316	-1.39982	0.249916	2.27273	0.633444	0.35858	-0.584165
NDRG4	1.9269	-1.26532	-0.727815	-0.644447	0.954052	-0.227269	0.295586	-0.219468	-0.95146	0.859242
USP46-AS1	1.11198	-1.75494	-1.75494	0.330929	0.226196	0.6623	0.451051	0.326502	0.754601	-0.353689
LOC441601	-0.316228	-0.316228	-0.316228	2.84605	-0.316228	-0.316228	-0.316228	-0.316228	-0.316228	-0.316228
TM2D3	-0.273537	1.76403	1.19657	-1.08785	-1.14831	0.937253	-0.792702	-0.30952	0.200595	-0.486527
DNAJC22	0.842112	0.0827199	-0.084057	1.24143	-0.109965	1.0646	-1.91185	0.313189	-0.0854765	-1.3527
RNASET2	0.0341122	1.77148	1.06855	-0.369113	0.806961	-1.06744	-1.2421	0.40786	-0.494938	-0.915365
AASS	1.4452	-0.353619	-0.567173	-0.0336158	-1.05979	0.297298	1.36662	0.0587362	-1.74204	0.58838
LOC728392	2.21912	0.778616	-0.77787	-0.853085	-0.321794	-0.515945	0.242457	-0.507782	-0.973075	0.709362
BAZ1B	1.79292	0.0462138	-0.486734	-0.964927	-0.683694	-1.01674	1.42661	0.137173	-0.842568	0.591748
MIR98	-0.115758	-1.18897	0.804162	-0.411345	-0.450729	1.95541	-0.605549	0.938425	-1.18897	0.263321
S100A1	0.609957	0.81527	0.811511	0.932023	0.469748	0.1638	-1.93553	-0.891035	0.277739	-1.25348
USP12	-1.32731	-0.716271	0.0955711	0.883448	0.865585	-1.65038	0.497073	0.907988	1.026	-0.581701
FOXF2	-1.42944	0.252137	0.503638	1.81552	-1.45667	0.810925	0.101807	0.184261	-0.717944	-0.0642355
VPS39	1.64223	0.923239	0.43448	0.709686	-0.492428	-1.87039	-0.976924	-0.0332987	-0.21979	-0.116796
TTC21A	-0.518354	0.974466	-0.515929	0.388376	0.00372087	1.29538	-1.91091	0.467346	0.856569	-1.04066
C9ORF116	-0.269213	-0.414174	-0.435321	0.00819458	0.106671	2.56546	-1.1983	-0.689758	0.228233	0.0982068
EIF2B3	0.668041	-0.758145	-1.54488	1.06265	0.643619	1.19631	0.794509	-0.509259	-1.287	-0.265846
CCNA2	-0.958972	-1.16623	-1.12451	-0.607117	0.68549	0.827809	1.34486	1.41336	-0.348426	-0.0662604
WDR26	0.532922	0.198989	-0.821168	1.36315	-0.925045	-0.993099	-0.652558	-0.260372	1.91787	-0.36069
TESK1	0.719511	0.421567	0.463488	0.887433	-0.427522	-1.65747	-1.49482	1.43742	-0.102421	-0.247195
ZNF662	0.892503	0.330703	0.448321	-0.660326	1.82035	-0.428464	-1.53934	0.65163	-0.664332	-0.851044
RRAGB	2.37156	-0.118316	-0.28214	0.437689	0.0394259	-1.43429	-0.925232	-0.357837	0.0588656	0.210265
TTC14	0.826582	-1.00662	0.0935373	-0.869208	-1.03307	2.0741	-0.882707	0.161065	0.0330916	0.603228
PUS3	0.84537	-0.919949	-0.789019	0.382323	-0.513909	-1.48978	0.629892	1.89282	-0.340226	0.302474
HSPB11	0.0164212	0.49003	-1.01054	0.617651	0.501328	-1.51794	-0.291192	2.0584	-0.201591	-0.662567
SNORA71E	2.02061	-0.00960962	0.717394	-0.236084	0.86232	-1.6221	-0.78944	-0.43785	-0.373681	-0.13156
ULBP1	1.2037	-0.726548	-0.726548	-0.726548	0.220678	-0.726548	1.58646	-0.726548	-0.726548	1.34845
RHPN1-AS1	-1.99868	0.602436	-0.496102	1.70351	-0.289404	0.915033	-0.346055	0.517847	-0.312399	-0.29619
PKNOX2	1.42378	-0.663454	0.586724	-0.56411	-1.01161	0.846009	-1.37445	1.04466	0.600992	-0.888534
ZFP30	-0.492181	-1.94114	0.135613	0.526408	-1.31329	1.12507	-0.073647	0.994501	0.810756	0.227914
USH1C	-0.0186661	-0.16771	0.0285512	-0.684881	-0.684881	-0.684881	1.46767	-0.684881	-0.684881	2.11455
DNMT3A	0.212459	-0.826148	-0.145888	-0.216935	-0.520316	0.564157	1.89618	-1.50171	-0.630763	1.16897
CATSPER1	-0.668453	-0.395278	1.48343	1.13269	0.873168	-1.96083	0.103674	-0.357412	-0.375066	0.164075
SNX3	0.441555	0.369565	0.176352	0.175603	0.264554	-0.312598	0.290293	1.74471	-1.15718	-1.99285
ZDHHC23	0.0216406	-1.69603	-0.626851	-0.521701	0.414621	-0.444568	1.24635	0.607524	-0.655237	1.65425
HDAC7	1.42167	0.972957	0.285407	-1.14433	-0.139571	-1.45562	0.609526	-1.11985	-0.313022	0.88283
PANK2	-2.29471	0.634556	-0.149748	0.521064	0.0686302	-0.203941	0.0495823	-0.785225	0.938488	1.22131
TSFM	1.49521	-0.423457	0.0728089	-1.51451	1.35576	-0.959939	0.425557	-0.58465	0.771815	-0.638596
SARM1	0.752591	0.892488	0.462855	-0.00780179	-1.10273	0.431549	-1.67301	-0.147284	1.44533	-1.05399
KCNF1	-0.468246	-0.468246	-0.468246	-0.468246	-0.468246	-0.468246	1.53399	-0.468246	-0.468246	2.21197
FIP1L1	0.133963	0.190807	-0.509919	0.0298392	0.157671	0.720884	1.52285	-2.06809	0.78515	-0.963163
PDZD11	2.22549	-0.0336013	0.150061	0.152784	0.616367	-1.67003	-0.291718	-0.0236943	-0.326071	-0.799587
RAF1	-2.24506	-0.323805	-0.207477	-0.0462449	0.299061	0.479864	0.567677	1.28128	0.965415	-0.770716
ALDH18A1	-0.585596	0.235343	-0.622442	-0.177925	-0.190319	-1.20748	1.21362	-0.649949	-0.195794	2.18054
TM9SF2	-1.25718	0.510009	1.15771	0.292325	-0.199173	0.00384129	-1.20758	1.14763	0.963323	-1.41091
HTATSF1P2	-0.449217	0.610523	0.538024	1.55345	-0.217525	-0.167174	-0.360691	0.89841	-2.15589	-0.249911
NR3C1	0.784181	0.818929	0.922318	-0.266682	0.224177	0.610179	-0.688596	0.824655	-1.64689	-1.58227
CELF6	0.430497	-0.183668	-0.472917	0.383038	-0.342453	2.238	-1.04562	-1.19652	0.703784	-0.514139
HORMAD1	-0.908614	1.10901	-0.7818	1.65239	-0.66137	-0.986324	0.32795	-1.04498	0.367331	0.92641
VPS54	1.48694	0.321479	-1.6115	1.5043	-0.5593	-0.600782	0.29022	0.0104514	-1.01814	0.176334
NTN5	0.433975	1.07884	0.39346	-1.78083	-0.12397	-1.78083	0.0614197	0.798367	0.648127	0.271428
WDR3	-1.40866	-1.14356	0.158228	0.943058	-1.08162	-0.267934	1.64405	0.902352	0.161958	0.0921235
GOT2	1.81538	-0.291563	0.878085	-0.498179	0.619128	-0.62966	-0.828723	0.820209	-1.52752	-0.357153
ZNF607	-2.08216	-1.01994	-0.0489513	0.634461	-0.752806	1.07765	0.359904	1.00931	0.362116	0.46042
CD48	-0.495496	1.61412	1.1345	0.285839	0.993873	-0.134871	-1.3673	-0.192559	-0.620342	-1.21776
ERAL1	0.49224	-0.673041	-1.39625	0.395712	-1.23116	0.998771	0.811684	1.51478	-0.0592662	-0.853477
IRX3	0.14004	-1.70836	-0.440041	0.921674	0.138895	1.36255	0.644543	-1.30099	-0.588296	0.829977
NME7	0.641995	-1.21866	-0.0913036	-1.11146	0.252706	0.935889	1.23774	-0.733756	-1.14928	1.23614
SNAP29	-1.13468	-0.58332	-0.0679112	1.2035	0.742166	0.694574	-1.11557	1.54886	-0.189096	-1.09852
THEM4	1.83037	-0.195044	-1.92043	1.14223	-0.0375029	-0.601767	0.221567	-0.427787	-0.113637	0.102
HOXD13	-0.227279	-0.103246	-1.08321	-0.77236	-0.566301	-0.178327	1.88267	-0.123769	-0.547441	1.71926
EED	0.368213	0.613702	-1.08448	-0.833459	-1.04684	-0.379779	0.740576	1.70231	-1.0218	0.941554
LAMP2	0.26178	1.15756	0.0928557	0.454335	0.473927	-0.932551	-1.68489	1.29608	0.19456	-1.31366
TNFRSF12A	-0.400733	0.516218	0.311144	1.69622	-0.131702	-2.13552	-0.262149	-0.263645	0.908837	-0.238667
TMEM242	0.277525	0.0150513	1.21127	-0.0630872	0.159362	-2.59212	0.296662	0.778124	-0.112916	0.0301294
ACTN4	-0.250553	0.957445	0.663625	0.440246	1.11508	-0.851619	-0.317117	-1.89368	0.996121	-0.859551
HCG4	-1.16239	0.992708	-0.773024	-0.725693	1.37395	-0.323731	-0.93933	-0.0848087	1.63002	0.0122981
ZNF350	0.912746	-0.0404558	0.278473	1.6081	0.135744	-1.45288	-1.26512	1.02285	-0.656004	-0.543449
TEX29	-0.118933	1.03475	0.208832	-1.78746	0.183709	-1.78746	0.731747	0.282637	0.781755	0.470425
DBI	0.727779	0.325335	-0.696969	1.25772	1.09354	-0.888957	-1.65927	0.188997	0.680687	-1.02886
NKRF	1.64518	0.988045	-0.27505	0.193374	-0.642964	-2.11598	-0.140282	0.391532	-0.285924	0.242075
EPN3	-0.818518	-0.818518	1.13635	0.154242	1.93253	0.768187	-0.818518	-0.818518	-0.818518	0.101279
LIMD2	0.448857	0.884475	0.348673	0.60821	-1.17379	-2.23352	-0.499963	0.622753	0.382659	0.611649
GCSAM	0.554189	1.63915	0.707256	0.586464	0.896915	-1.12729	-1.12729	-1.12729	-0.354395	-0.647704
LOC100128079	1.31889	-0.172422	1.72284	-0.1336	-0.208904	0.36262	-1.64598	-0.766469	0.335599	-0.81257
NDFIP2	0.398179	-0.766595	1.33166	0.734142	-1.19139	-0.199597	0.542178	-1.54865	1.22894	-0.528859
SH3GL1	0.575939	-1.23713	0.944961	-0.385124	-0.517044	1.39206	-0.436304	-1.45324	1.2531	-0.137227
C1ORF50	0.798076	-0.801009	-0.145771	0.530615	-0.596762	1.97914	0.148557	-1.74356	-0.27059	0.101302
RPL22	0.47991	-0.535289	-1.33355	0.134634	1.04408	-0.43374	1.26014	-1.1627	-0.803598	1.35013
TRMT12	-1.49094	1.41931	-0.0812414	0.704911	-0.756044	1.53389	-0.893209	-0.52964	0.401513	-0.308552
HDAC11	-0.259432	0.345165	0.888356	-0.559437	0.375729	0.14485	-2.17861	0.679271	1.32666	-0.762549
CCDC126	-0.409494	1.03333	-0.266721	-0.815857	0.203119	-1.98552	0.557004	1.17386	-0.527753	1.03804
TMEM250	-0.6598	-0.195922	0.437255	1.13874	-0.322287	-2.17024	-0.576131	0.655926	0.723433	0.969024
ZG16B	0.636866	0.374329	-1.26951	1.10067	1.15807	0.983605	-0.233167	-1.26951	-0.211831	-1.26951
LINC02313	-1.07427	0.496291	1.10492	1.5287	0.17863	-1.07427	0.322244	-1.07427	0.666298	-1.07427
LETM1	2.27963	-0.710347	0.561583	-0.603006	0.410582	-0.507074	-0.592927	-1.13043	0.656858	-0.364863
TRAPPC13	1.42442	0.335552	0.16053	0.394861	-0.234151	0.928341	-1.89187	0.681936	-1.11957	-0.680048
PHLPP1	-0.0834378	0.621547	1.46675	-0.852498	-1.27855	-0.0657996	-0.518281	0.775616	1.23565	-1.30099
KALRN	-0.438168	-0.535532	-0.00637103	-0.705478	-0.554582	-0.278847	1.796	-0.206624	-0.938368	1.86797
BLOC1S3	-0.368608	0.0555756	1.33541	0.155666	-0.195518	1.18139	-1.63917	-0.0704249	0.961227	-1.41555
EDEM2	1.60985	0.527047	-1.25012	0.246089	-0.240953	-1.25012	-1.25012	1.07869	0.364308	0.165322
WDR66	-0.370891	-0.545872	-1.54161	-0.58814	-0.488233	1.69316	0.570321	1.25859	-0.636878	0.649548
XRCC6	-1.42537	-0.574426	-0.442707	-0.324478	0.0315923	-0.514836	2.00893	0.955226	-0.592441	0.87851
XKR4	-0.981531	-0.981531	0.0970129	-0.0637734	0.387306	-0.981531	1.42676	-0.981531	0.412307	1.66651
RCL1	-0.950453	-1.06767	0.584773	0.324215	-1.57765	-0.175134	0.86541	1.49785	-0.411421	0.910079
TRIM51	-1.63187	-0.00466796	-0.174325	0.316291	0.262514	0.373125	-1.2276	1.62438	1.16542	-0.703265
CCL18	-0.414892	0.300966	-0.126841	1.83179	0.765585	-0.744373	-1.52234	0.298419	0.739528	-1.12784
TMEM53	-1.81107	-0.459656	-0.244892	0.543317	0.547637	1.26757	-0.806409	-0.32469	1.55555	-0.267351
ORMDL3	0.283621	0.728752	0.469305	-0.391056	-1.37063	1.16078	-0.294857	1.36705	-0.295871	-1.65709
CFAP74	0.697153	0.358789	-1.31692	-0.208464	-0.882326	2.16556	-0.355297	0.549859	-0.822279	-0.186071
CYR61	-1.56452	0.0917344	0.525265	-0.0845717	-0.942731	-0.181537	1.34792	1.73279	-0.677137	-0.247216
LRCH3	-0.367993	-1.38349	0.11119	-0.387572	-1.30442	1.982	0.320684	-0.287747	0.887589	0.429754
RNF26	-0.913034	-1.831	-0.231279	0.230574	-0.461448	-0.741757	0.859511	1.16052	0.965014	0.962902
RTP5	-0.817105	0.55111	2.12972	0.332604	0.274376	-0.817105	-0.817105	0.79771	-0.817105	-0.817105
ARRDC3	0.689111	0.0987974	0.731704	-1.40432	-0.901872	1.75356	-0.239037	0.720324	-1.22151	-0.226746
CRADD	1.70286	1.04863	-1.21235	0.596435	-0.67982	0.0446783	0.650808	-1.13522	-0.016813	-0.999207
FMO2	-0.0657757	1.54372	1.73698	0.193737	-0.742374	-1.18862	-0.691727	-0.855533	0.471371	-0.401778
KCNN3	-1.01608	-0.456953	-0.604436	0.363916	0.307488	-0.627249	1.49773	-0.514046	-0.838034	1.88767
AFG3L1P	0.46005	-0.0887351	0.0590253	0.272414	0.265228	-1.54361	1.09785	-1.47192	-0.626728	1.57642
BANK1	0.0222189	0.333787	2.17618	0.521664	0.689367	-0.65306	-1.19803	-0.906014	-0.149438	-0.836669
SCAF11	0.981681	0.166889	-1.25447	-0.999571	-0.21617	0.717871	0.721604	0.435684	-1.69271	1.13919
HIST2H3PS2	1.91222	-0.0401165	-0.098816	-0.711065	0.889414	-1.30804	-0.608549	-1.05925	0.904258	0.119951
YY1AP1	0.264556	1.68966	-0.433236	-0.351323	-0.660052	-1.66815	1.56085	0.0184222	-0.10925	-0.311472
ZRANB1	-1.6196	-0.247242	-0.955093	-0.351245	-0.052437	0.632605	1.39749	-0.155972	-0.32091	1.67241
GAL3ST2	0.545699	-0.940917	0.0972988	-0.940917	-0.940917	-0.940917	1.20181	0.299915	-0.264461	1.8834
AREG	-0.217537	1.80193	-0.356559	0.00564306	-1.25085	0.693645	-0.258475	1.36568	-0.964239	-0.81924
PCNX2	0.916854	0.527526	-0.298789	-1.54539	0.200463	-0.0239711	1.29272	-1.68154	-0.275657	0.887779
TAF8	-1.80924	0.721475	0.388607	1.84026	-0.419018	0.694852	-0.745879	0.196833	-0.295288	-0.572601
EHF	1.111	0.205885	1.56557	-1.04056	0.17847	1.11473	-1.04056	-0.215489	-1.04056	-0.838484
ASAP2	1.0367	-0.741709	-0.729584	-0.534909	-0.648244	0.124031	0.0416632	-1.22888	0.627888	2.05304
RNASEH1-AS1	0.81207	-0.501913	-2.12471	0.215125	0.432003	0.0995629	-0.362147	-0.763998	0.773172	1.42084
ZFYVE1	-0.125025	0.449996	-0.0174037	1.26398	0.894274	0.396825	-2.04501	-0.30905	0.699605	-1.20819
CHST5	0.966492	-0.758084	0.299104	0.251026	-0.189997	-2.2932	0.697178	-0.481403	0.448108	1.06078
VPS51	0.313806	0.0798431	0.718939	-2.42431	-0.965697	0.933193	0.748201	0.202491	0.0983812	0.295148
SGSM1	0.585261	-0.210908	0.47	-0.532374	-0.489311	-1.25419	0.656281	-1.25419	-0.0419844	2.07142
VDAC1	1.47281	0.694255	0.330936	0.839695	0.0846847	0.0582055	-0.417353	0.0361627	-1.02765	-2.07175
JPX	0.897227	1.15997	0.166828	0.260823	-0.853533	-2.23368	0.179538	-0.191793	-0.316338	0.93095
PLA2G15	-0.0394491	0.374732	0.232016	1.16472	-0.0183367	-1.67938	-1.13136	-0.238349	1.76281	-0.427407
NHSL1	-0.360874	0.112495	0.377702	1.61492	0.49333	-0.754172	-1.42688	0.680717	0.754589	-1.49183
RINL	0.126789	1.49082	1.27424	-0.577476	0.79222	-1.40081	-0.562842	-0.31914	0.441437	-1.26524
PCDHB9	0.783382	-1.49767	0.391765	-1.30493	-1.37655	0.377081	0.876411	0.993859	0.0560419	0.700622
ZNF418	0.537311	-2.46515	0.0958405	0.155635	-0.521827	1.35994	0.0383423	0.0399694	0.0738976	0.686044
DUBR	-0.67907	1.15692	-0.537825	0.348977	-1.82029	-0.0348945	0.930029	-0.615675	1.47654	-0.224723
GPRIN3	0.924398	0.5605	0.0900931	-0.0112342	0.230584	1.20491	-1.5208	0.976164	-1.36841	-1.08621
TMED9	1.13841	0.818028	0.968688	0.607585	-0.929952	-0.414517	-1.36345	-0.838715	1.03851	-1.02459
CNTN3	-0.762843	-0.440051	0.1932	1.33613	1.36574	-1.44668	0.484019	-1.06659	-0.543871	0.880934
ARHGAP39	-0.434141	-0.896344	-0.864592	1.40591	-0.910127	2.0386	0.0802614	-0.261517	-0.404948	0.2469
ZNF599	-0.668656	-1.34284	0.243898	-0.671419	0.651339	0.814627	-1.10447	1.4386	-0.591031	1.22996
C15ORF40	-0.0647199	-0.303984	-1.09105	0.0821654	2.24611	0.0569346	-0.427501	0.881719	-1.3006	-0.0790702
DTNBP1	-1.77882	-0.212061	0.257086	1.39895	0.773663	0.364629	-1.25456	0.325712	0.883767	-0.758368
SYMPK	1.26664	0.589903	0.658622	0.866999	-0.661587	-0.104714	-0.441366	-1.37256	0.826468	-1.62841
HOXD10	0.228302	-0.407536	-0.667984	-0.735308	-0.673725	-1.12416	1.66319	0.636353	-0.537065	1.61793
GPNMB	0.244178	0.55721	0.465399	0.377284	0.390618	1.10849	-1.70158	0.682644	-0.264609	-1.85963
FAM166A	1.67085	0.0054994	-1.02259	0.193377	-1.02259	-1.02259	0.263403	-1.02259	1.01948	0.937743
TOX4	-0.433562	0.545208	0.961542	0.429675	0.248882	0.528066	-1.02627	1.41338	-0.85509	-1.81183
FANCA	0.0972817	-0.68797	-0.60498	-0.467165	-0.343663	-0.636851	1.84246	-0.337992	-0.705684	1.84457
STIL	-0.599585	-1.06654	-1.73543	-0.100964	0.516754	-0.262073	1.20435	1.45497	-0.155636	0.74415
HRH4	-0.266622	0.0935512	2.01068	-0.232868	0.61129	-1.95037	0.269588	-0.236546	-0.63527	0.336572
C17ORF100	0.905222	1.03168	0.14831	-0.229488	-0.521211	-2.50771	0.242905	0.0953746	0.597221	0.237691
YRDC	-0.132303	0.204598	-0.0208854	1.25553	-0.0816532	-2.56675	0.170193	0.382316	0.770386	0.0185754
THUMPD2	0.0733763	0.0880605	-1.11571	-0.523949	-0.299266	0.420219	1.8774	-0.864783	-1.02549	1.37014
CYP4Z1	1.74312	-0.868652	0.437864	-0.868652	-0.868652	0.944756	-0.868652	1.03496	-0.868652	0.182562
CAMKK1	0.702469	-0.342602	0.0365993	-0.0911597	0.566788	0.406823	-1.26218	-0.488792	1.96075	-1.4887
CLECL1	-0.0687062	0.949511	1.06434	-0.168557	0.182605	1.7141	-0.841587	-1.25477	-0.322163	-1.25477
LOC101927391	0.272051	0.552862	0.532965	-1.0407	-1.0407	-1.0407	-1.0407	1.8929	0.405279	0.50672
CPXM2	2.06272	0.0823458	-0.640448	-0.157439	-0.125011	-0.260597	-0.978402	-1.04292	-0.368292	1.42804
KCTD7	-0.0414293	1.34706	0.214075	-0.167814	0.608868	-2.23597	0.160597	-0.839997	1.00287	-0.0482622
ZNF280D	0.941069	0.0971375	0.643028	-1.40016	-0.429665	0.57781	0.971751	-1.39718	-1.07803	1.07424
DNM3	1.57271	-0.708327	0.32202	-0.818335	0.703715	0.254454	0.724084	-1.72945	-0.910349	0.589476
CHCHD10	1.12441	0.544869	1.59118	-0.615774	0.583457	0.0302402	-1.13413	-0.886741	0.202265	-1.43978
MARVELD3	-0.862741	-0.862741	1.09885	0.334423	0.124076	-0.862741	1.10899	-0.862741	-0.862741	1.64737
FRMD5	1.27792	-1.05973	0.625175	0.333271	0.829207	-2.16891	0.0317212	-0.194855	-0.196096	0.522304
CD24	-1.22747	0.0498836	0.606596	-0.697152	-0.217908	0.955544	0.993269	-1.22747	-0.819855	1.58457
BCKDHB	-0.323298	-0.899843	-0.250385	-1.14265	0.772988	-0.804363	0.808155	2.0715	0.384822	-0.61693
CPO	1.62943	-0.429031	0.4308	-1.17426	0.133125	-1.17426	-0.704438	1.1741	0.869206	-0.754667
SNORA24B	1.07203	0.066914	-0.647015	-0.79259	1.86954	0.66897	-1.62352	-0.456442	-0.0862129	-0.0716693
ZCCHC8	-0.950266	1.11233	-1.92263	-0.104563	-0.61441	1.36986	0.659032	0.645913	0.0199395	-0.215211
JAG1	-1.39413	0.230234	1.37073	0.0923854	-0.0509315	-0.80081	-1.43532	1.27074	-0.161089	0.878193
LRRC37A3	-0.91406	-0.0550496	-0.55431	-1.41374	-0.174788	1.55191	0.566665	0.399399	-0.877654	1.47163
CHCHD2	-1.97857	0.0670898	1.07436	-0.615241	1.13647	-0.212344	1.07038	-0.759246	-0.373953	0.591051
SNHG9	1.27858	0.527316	-1.28725	0.237526	0.160303	1.19987	-1.28725	-1.28725	0.723736	-0.265577
BPIFC	-0.448367	-0.448367	-0.448367	-0.448367	2.48582	1.10112	-0.448367	-0.448367	-0.448367	-0.448367
ANKHD1-EIF4EBP3	-0.0225396	0.555858	1.05168	0.017371	-0.305953	-2.11847	0.476618	1.45291	-0.713911	-0.393556
HIST1H3G	0.323177	0.646378	0.742138	-0.384467	-0.267956	-0.528167	2.11093	-1.40854	-0.954119	-0.27937
LOC101926964	0.321715	-0.966618	0.438993	-0.418218	-0.966618	1.71653	1.22897	-0.966618	-0.966618	0.578487
LOC100507557	-1.32002	0.728608	-1.32002	0.401438	-0.161904	-1.32002	-0.0284803	1.09784	0.950364	0.972189
PPIL6	-1.05191	0.24938	-1.34763	-1.24148	0.668515	1.44144	0.520161	1.02901	-0.67414	0.406655
RAD52	1.43181	-0.335436	-0.160248	0.00205328	-2.03524	0.276164	1.1838	-0.449786	-0.658624	0.745507
OVOL1	0.542521	0.331625	-0.988873	-0.988873	1.99064	0.821056	-0.988873	-0.988873	0.20933	0.0603243
BEX3	0.711431	-0.172465	0.723337	-2.38956	-0.0555838	-0.897223	0.633029	0.0366456	0.590811	0.819574
DTNB	-0.745668	0.202215	-0.827809	-0.480242	0.146881	-0.827831	2.1963	0.0383253	-0.82852	1.12635
C2CD5	0.220712	-0.0672716	-0.3082	-0.709843	-1.12367	-0.667843	2.08474	0.0287097	-0.76429	1.30696
NTS	-0.692096	-0.692096	0.0225988	-0.083946	-0.282962	-0.692096	2.49728	-0.692096	-0.226432	0.841847
DNAJC14	0.748034	-0.688674	-1.51111	-0.168754	-0.55917	-0.676581	0.793	0.156547	-0.144975	2.05169
SP140L	0.89275	1.1255	0.57189	0.796407	0.33106	-1.82062	-1.12512	-0.729711	-0.634019	0.59187
DAPP1	-0.132163	1.33073	1.21233	0.344917	1.34143	-0.866127	-1.31608	-0.596098	-0.418464	-0.900479
CITED2	0.136102	0.488348	0.628418	-0.579563	-0.0912593	-2.41261	0.416641	1.16488	-0.432988	0.682033
MTMR4	0.608834	0.709262	-0.32717	-0.452429	-0.769553	2.05882	-1.04906	-1.25232	0.55507	-0.0814566
FIBP	1.07681	-0.424985	-1.52609	0.423794	0.836385	0.310356	-0.485371	-0.441667	1.51148	-1.28071
GLYCTK	-1.61347	1.13113	1.23961	-0.792886	0.999164	-0.58079	-0.841577	0.173602	0.789623	-0.504412
ZNF304	-0.350951	0.298413	1.17642	-0.375989	-0.211394	1.88533	-1.65983	-0.122167	0.266861	-0.906698
C19ORF12	-0.409241	1.27499	0.690308	0.00429638	0.0617272	0.527582	-1.72366	0.859915	0.334535	-1.62045
NEURL3	-0.320579	1.49097	1.69834	-0.305872	0.0619567	-1.05425	0.595668	-1.05425	-1.05425	-0.0577473
PDLIM1	-1.8399	-0.638053	-0.262536	1.10372	0.200562	0.781497	0.686898	-0.48336	-0.883987	1.33516
FAT4	-1.3802	-0.454594	0.736474	-1.11353	1.16502	1.13077	0.258213	-0.988079	-0.457603	1.10353
SLC25A42	0.421645	0.00940929	1.66315	-0.0822156	0.37732	0.754914	-1.8414	0.359996	-0.365463	-1.29735
RNU5E-1	-0.790506	0.229636	-1.61497	0.262567	0.767737	-1.22219	1.07591	1.00673	-0.679162	0.964256
CASP4	0.397524	1.05308	0.587159	0.652948	0.20513	-0.195419	-2.19805	0.559203	0.23538	-1.29695
LTA4H	-0.684333	0.989104	-0.286809	-0.134383	0.114742	-1.51582	2.19903	-0.544971	-0.0760002	-0.0605511
LINC01481	1.51953	0.122502	0.0946205	-0.234115	0.0665223	0.950151	0.682671	-0.238134	-2.11052	-0.853237
GLYR1	0.256479	0.0242932	0.227713	1.16665	-0.232147	0.18852	0.430913	-2.61531	-0.0791372	0.632027
TUBB4B	-0.720306	-1.51809	-0.274724	-0.0876181	1.0257	0.400561	-0.656391	-0.0404349	2.09702	-0.22571
ZNF468	-0.0811294	0.141556	0.453029	1.39479	-1.75823	1.51276	-0.387733	-1.10478	0.0844633	-0.254728
CUL1	1.98936	0.151125	-0.212055	0.642256	0.0442676	-1.46828	0.770301	-0.820223	-1.06645	-0.0303112
SKIV2L	-0.662592	-0.319009	0.501779	1.42138	-0.792437	1.25835	0.214652	-1.53677	-0.927078	0.841732
SNAPC3	-0.543687	-0.481551	-0.28548	0.565878	-1.671	1.74165	0.882133	-0.209315	-0.842893	0.844257
KLHL20	1.59926	-0.257723	0.730748	-1.62412	-0.605027	0.113253	0.866892	-1.17579	-0.384639	0.73715
MMAB	0.762024	-1.4032	-1.40535	-0.263177	1.56591	1.09347	0.404739	-0.518538	-0.503821	0.267942
PGM5	1.26021	-0.11138	0.0821799	-0.827731	1.14828	-1.85032	0.42893	-0.590237	-0.584569	1.04463
BUB1B	-0.455571	-1.08165	-0.941552	-0.858169	0.294127	-0.127548	1.79814	-0.178337	-0.070143	1.62071
NCOR1P1	-0.316228	-0.316228	-0.316228	-0.316228	-0.316228	-0.316228	-0.316228	-0.316228	-0.316228	2.84605
C1ORF185	-0.547188	-0.547188	-0.547188	-0.547188	0.120016	-0.547188	1.91234	-0.547188	-0.547188	1.79795
ZNF484	-1.63352	-0.452867	-0.372364	-1.07111	0.977701	1.66677	-0.544495	0.34552	0.315502	0.768868
OR1J4	1.4368	0.699388	0.681615	-0.742276	1.63586	-0.742276	-0.742276	-0.742276	-0.742276	-0.742276
ALKBH2	0.447411	-0.385057	-1.60458	-0.216314	0.497157	-0.682083	1.98775	-0.912666	0.713948	0.154431
CCL4L2	-0.359967	1.12192	0.490462	-0.0374189	0.330806	-1.3357	-0.854199	1.96676	-0.618394	-0.70427
SBK1	-0.563788	-0.196497	-0.489105	-0.892661	-0.223779	-0.814572	1.45269	-0.039176	-0.385622	2.15251
SH2D2A	0.296395	2.10545	0.489726	-0.103896	0.564431	-1.08266	-0.289397	-1.46094	-0.698337	0.179227
ZNF502	-2.18613	-0.460353	0.498817	-0.177476	1.0072	-1.075	0.784924	0.763043	0.462468	0.382505
COL4A5	-0.822581	0.148388	-0.28967	-1.40911	-0.503802	0.666974	1.16414	-1.22283	0.900139	1.36835
TIMM8B	0.60469	-1.06238	-0.20836	0.0144675	-0.600796	0.418671	0.0724849	2.22362	-1.40454	-0.0578544
THRA	1.44839	-1.40713	0.445391	0.111768	-1.23814	1.18657	-0.529916	0.66865	0.292599	-0.978171
RPS26P11	-1.22105	0.635604	0.0840592	-0.110503	1.59079	-1.22105	1.22733	-1.22105	-0.0218363	0.257699
MFSD7	-0.507122	1.17793	0.782307	-0.121782	0.119101	-1.41802	-0.78357	-0.0979476	1.78827	-0.939158
KCNK1	-0.881851	-0.404766	0.395852	-0.881851	-0.00578642	-0.227939	1.24691	-0.481816	-0.881851	2.1231
ANXA1	0.761249	0.0730612	-0.296129	1.58254	-0.250675	0.690171	-1.33655	-0.959714	0.995319	-1.25928
ADH1A	-0.823622	1.62276	1.59332	-0.823622	0.392266	-0.823622	0.530945	-0.823622	-0.0211779	-0.823622
POMP	-1.24515	-0.282458	0.273483	-0.0676795	2.47992	-0.736357	-0.210786	0.310897	0.139649	-0.661518
TOMM7	0.0681887	1.51979	1.07803	-0.248045	0.17961	0.294139	-2.00438	0.0248071	0.218086	-1.13023
PAX8-AS1	-1.26685	-0.447203	-0.601577	0.0125079	-0.995803	1.3544	1.43749	-0.864818	0.331158	1.0407
PHF6	0.646173	-0.293544	-0.693773	-1.19262	0.241321	-0.727133	0.963229	1.65891	-1.33674	0.734171
FIGN	-0.114699	-0.742317	0.30231	0.692234	-0.772277	2.48585	-0.15169	-0.414567	-0.828295	-0.456547
SEPT7P9	-0.192014	-0.382607	0.994278	-1.57598	-0.412524	-1.57598	0.513586	0.620913	0.903813	1.10651
GCKR	-1.27287	0.213871	-0.41403	-0.542064	-0.781219	1.27456	1.44967	-1.27287	0.609986	0.734973
BGN	-0.130321	-1.02482	0.290752	0.150299	0.0827729	0.851262	0.261512	-1.5654	-0.870086	1.95403
DUSP27	1.70084	-0.846376	-0.846376	0.667342	0.171982	-0.846376	0.289304	-0.846376	-0.846376	1.40241
EHBP1	1.78705	0.121106	-0.184565	-0.340815	-0.869693	1.21907	-0.421177	-0.829843	0.858813	-1.33995
RAB4A	-0.0899397	0.0349088	0.0918473	-1.01688	-0.0230435	-2.11061	1.49394	0.961597	0.0842762	0.573909
PSPH	-1.70669	0.947247	-1.36241	-0.364349	0.739728	-0.664381	1.20935	0.232818	0.147824	0.820863
TM2D2	-0.83039	-0.163461	0.579319	-1.05467	-1.68502	0.809579	1.4985	-0.443304	0.828755	0.460688
TNFRSF17	-0.864264	1.26681	1.38959	0.0818127	1.47501	-0.864264	-0.864264	-0.314081	-0.442082	-0.864264
GEMIN5	1.30919	-0.387431	0.240917	-0.338175	-1.01817	0.738041	0.663924	1.31881	-1.19665	-1.33045
RAB19	-0.0899925	1.14067	1.84007	0.270654	0.833245	-0.930447	-0.930447	-0.930447	-0.272853	-0.930447
CLDN23	1.26659	1.11044	0.608741	-0.243958	0.581533	-1.55333	-1.55333	0.28574	0.173565	-0.675988
OLFML2B	-1.34376	-0.0853422	0.760497	0.624809	1.70528	-0.598216	-1.24697	-0.862405	0.75392	0.292194
SULF2	-0.98536	0.265726	1.47232	-0.635534	1.67988	0.464884	-1.37776	-0.470355	-0.474889	0.0610854
LINC02412	1.06487	0.909813	-0.710283	-0.710283	0.308027	-0.710283	-0.710283	1.97899	-0.710283	-0.710283
ZNF587	0.436681	-0.00681429	0.092011	0.376502	-0.155003	2.2822	-1.62165	-0.22237	-0.433697	-0.747855
GYS2	0.590744	0.128077	0.983945	-0.517071	-0.363216	-1.47735	1.66734	-1.47735	0.148805	0.316067
SP9	0.518158	-0.522857	-0.522857	-0.522857	-0.522857	-0.522857	0.600802	-0.522857	-0.522857	2.54104
ALMS1P1	-1.73453	2.00499	0.155168	-0.686506	0.11274	-0.0704548	-0.528078	0.435191	0.841889	-0.530405
SLC35C2	1.08586	0.686937	-0.608656	0.384984	-1.26588	0.815223	-1.97735	0.0695094	0.805333	0.00402824
CD74	-0.336396	1.68712	1.13444	0.16436	0.845934	-0.296049	-1.49217	0.060291	-0.627873	-1.13966
BRMS1	1.09421	-0.376712	0.565172	0.451662	1.3901	-1.60632	-0.987445	0.833732	-0.573161	-0.791245
GET4	-0.275152	-0.81028	0.377002	-2.09891	0.0200178	1.54661	-0.0517969	0.512144	-0.225567	1.00593
ADAMTS16	0.584886	0.29154	1.19378	-0.90854	-0.598004	-1.23224	-0.432338	1.83235	-0.928929	0.197495
TBX6	-0.936582	0.858973	0.506628	1.28637	0.239099	-1.71651	-0.74334	0.0928113	1.16118	-0.748633
PET117	0.109252	1.50512	-1.63001	0.639029	0.186443	-1.63001	-0.294057	0.139761	0.925925	0.0485505
PROSER2	-0.741889	-0.573521	-0.804439	-0.440779	-0.608414	0.854644	1.6867	-0.506799	-0.535779	1.67028
YIPF6	2.03434	-0.107241	0.420592	-0.800985	0.060778	-1.44691	-0.594791	1.05432	-0.68193	0.0618242
KCNJ15	-0.669751	-0.0722791	2.10149	-1.22545	0.377627	1.20212	-0.492782	-0.109781	-0.26555	-0.845642
RASSF8	0.155141	0.576197	-0.507317	0.310102	-0.463987	-2.13415	1.49794	0.940884	-0.588138	0.213322
ACP6	0.4369	0.25925	0.863703	-2.32803	-0.0164744	-0.234438	-0.806414	0.677274	1.1876	-0.0393666
C1QTNF7	-0.012115	0.0436822	0.339282	-0.306778	-0.0454663	2.4853	-1.0937	0.131122	-1.0937	-0.44763
ZNF185	-0.483151	1.50052	-0.197444	-1.75675	1.16731	0.94607	-0.730982	0.025149	-0.728524	0.257806
LONP1	1.12023	-0.798228	0.340085	1.88275	-0.484411	-1.56262	0.329854	-0.116675	0.0894124	-0.800407
POU5F2	1.38492	0.0108515	1.12606	0.222119	-0.909909	-2.11467	0.339046	-0.322532	0.456794	-0.192689
SAMD4B	1.7942	0.704578	-0.558952	0.453724	-0.662059	0.0750004	1.0411	-0.404879	-1.00813	-1.43458
METTL23	0.164446	0.498691	-2.17972	0.472729	1.46198	-0.187744	-0.581757	0.872548	0.152585	-0.673758
SLC19A2	-0.341159	1.44935	0.969378	0.255452	0.197462	-0.458074	-2.02178	0.273871	0.648291	-0.972798
SLC37A3	0.962382	1.22127	-0.341669	-0.497042	-0.888839	-2.05699	0.762727	0.347452	0.678022	-0.187308
NCS1	-1.10643	-0.635476	-0.970068	0.75224	-0.710589	0.00675848	0.0300357	-0.452275	1.9865	1.09931
NFKB2	-0.465354	1.32855	1.03926	0.196777	0.756069	-1.83004	-0.254718	-1.20115	-0.219774	0.65037
PTP4A2	0.0973417	1.3062	-1.1681	0.591937	0.181282	-1.02813	0.502045	1.3305	-0.268693	-1.54439
TNIP1	0.474896	0.81543	1.80458	0.552847	-0.269644	0.293831	-0.0713577	-1.40193	-1.07937	-1.11928
C2ORF16	-0.608237	1.10168	-0.608237	-0.608237	-0.608237	-0.608237	1.24895	-0.608237	-0.608237	1.90702
VEPH1	-0.547632	0.126888	0.200688	0.208364	-0.217899	0.347651	-1.65093	1.0426	1.745	-1.25473
FAM104A	-0.78076	0.82367	-0.149965	-0.000734794	-1.18929	-0.108531	0.29988	2.17468	-1.19509	0.126145
RP1L1	0.361021	0.832514	0.690554	-0.799045	0.195826	-2.10165	0.488761	-1.0354	0.259382	1.10804
TRMT13	1.08606	-0.182	-1.04291	0.545186	-1.31171	0.342566	1.36682	-0.381027	-1.32093	0.897946
PDXP	-1.86129	-0.376553	0.396331	0.638512	-0.805913	-0.890166	1.52114	1.00049	0.16557	0.211881
FIRRE	-0.13445	-1.23435	0.482749	-1.23435	-0.276795	0.174683	1.90424	-0.724729	-0.149018	1.19202
RAB11FIP5	1.02239	0.296666	-0.501237	0.71329	-1.78505	-0.93357	-0.79811	-0.161254	1.27492	0.87196
SCUBE3	-1.40033	-1.303	-0.523696	0.0221973	-0.374494	0.857038	0.725075	0.863364	-0.500279	1.63412
AGAP5	-0.318981	-1.29952	1.64802	0.977129	-0.724823	0.0753054	-0.0407747	-1.49798	0.411924	0.769697
DCTN3	0.485236	-0.782033	0.798274	1.32299	0.51502	-1.8492	-0.520065	0.823706	-1.03591	0.241986
TEKT4P2	0.392737	-1.17962	1.4136	-0.58946	-0.377169	0.219542	-0.95357	-1.08696	0.584189	1.57671
NDUFA12	1.3755	0.149675	-1.11137	0.244803	1.44472	-0.586662	0.0538177	0.676684	-0.691459	-1.55571
ZNF563	-1.44695	0.33243	-0.0572351	0.022938	0.441684	1.46786	-1.51136	1.2205	0.293308	-0.763179
MGEA5	-1.14732	1.54586	-0.640744	0.54743	0.734428	-1.15332	0.79306	-0.562809	-0.99683	0.880244
NOTUM	-1.07934	-1.07934	-0.231539	1.13553	-0.591905	-1.07934	-0.315044	0.996433	0.805552	1.43898
LAMC3	-1.21124	-0.95252	-0.0232504	-0.0640688	-0.537168	1.07117	-0.461196	-0.361906	2.16872	0.371456
KCNN1	-0.293814	0.216411	-1.4335	-0.368492	-0.130847	-1.4335	1.21902	0.0382416	0.490649	1.69584
ACAD11	0.161664	-0.332322	0.902194	-2.10684	-0.519797	1.61241	0.271565	-0.61066	0.535285	0.0864995
LPCAT1	0.648745	1.57534	0.332346	-1.01073	-0.56704	-0.891671	-0.0571571	-1.6109	0.772558	0.808511
LTBP4	0.318455	-0.71779	-0.355472	1.18509	-0.961258	1.75826	-0.221557	-1.42644	-0.366162	0.786879
MIR5699	-1.56118	0.472172	-0.131862	-1.56118	0.421831	1.21047	-0.274187	0.521353	1.31374	-0.41116
ZIC1	0.46668	-1.5824	-0.0688734	-0.194371	-0.397885	1.01055	1.04443	-1.6407	1.0967	0.265879
PXDN	-1.01536	-1.26118	-0.451511	0.480863	-0.372922	0.48819	1.29905	-0.755189	-0.217696	1.80575
ARL4D	-0.726041	-1.30194	-1.08304	0.928396	0.834428	1.34806	-1.22181	0.79574	0.133882	0.292326
SRP14	1.01577	0.719385	0.116886	0.648335	-0.137176	-2.42262	0.315856	-0.647112	-0.321362	0.712042
WWC1	-1.39861	0.995175	-0.126604	1.02836	-0.4351	0.247879	0.533086	-1.95613	0.542911	0.569045
MAGEC1	1.96182	1.40522	-0.333865	0.266459	-1.02364	0.293284	-0.649033	-0.287306	-0.70863	-0.924315
KDM6B	-0.869602	-0.730027	-0.160468	-0.567072	-0.906437	0.0610286	1.56402	0.140676	-0.489761	1.95764
ATG4A	1.51497	0.0497163	0.30312	0.517555	0.0400486	-0.348003	-1.10819	1.40009	-0.849371	-1.51993
MIR942	0.643246	-0.287944	0.737083	-1.77636	0.0890808	1.07385	-0.159752	1.4378	-0.818683	-0.938323
NUTM2A-AS1	-1.57184	-1.26691	0.72963	1.21304	0.038424	-0.625534	0.953012	-0.507555	1.16051	-0.122775
PMEPA1	-1.03347	-0.657611	0.171577	-0.416401	0.549444	-0.693951	1.52981	-1.07005	-0.115579	1.73623
RCN3	0.606201	0.0456917	-0.0378933	-0.246919	1.66061	-0.615043	0.103815	-2.11874	-0.311615	0.913889
SVOPL	-0.747297	0.411069	0.396606	-0.747297	-0.0924576	2.31961	0.701653	-0.747297	-0.747297	-0.747297
CACNG7	-0.464249	-0.464249	-0.464249	-0.464249	-0.464249	-0.464249	1.42173	-0.464249	-0.464249	2.29226
BMS1	-0.618027	-0.410455	-0.915651	0.442703	1.28902	-0.790365	1.6341	-1.24864	-0.28674	0.90405
PRSS46P	-0.839526	1.78056	0.828314	-0.839526	1.16506	-0.839526	-0.0817188	-0.839526	-0.839526	0.505421
AOC3	-1.83295	0.276703	1.41872	1.21525	0.214203	0.335107	-0.992945	-0.825859	0.434693	-0.24293
ADGRF5	-0.56019	-1.03256	0.232142	1.87393	0.427819	-0.370585	-1.39425	1.2916	-0.31306	-0.15484
NUTM2D	-0.834474	-1.61512	-0.173382	0.216139	-1.30689	0.404947	0.957263	0.989842	0.00146363	1.36021
TXNL1	-1.1547	0.10214	-1.2129	-0.176049	0.617171	0.254597	1.51332	1.47097	-0.350876	-1.06367
ASNS	0.830498	0.00268181	0.515445	-0.208633	-1.3205	1.2133	0.852181	-1.3205	-1.3205	0.756027
KCNMB4	-0.624835	-0.451575	-0.250965	-0.425415	-0.14663	0.957055	1.68985	-1.44452	-0.661209	1.35824
CCNI2	0.517582	1.82502	1.43491	-0.166876	0.193084	-0.899244	-0.899244	-0.899244	-0.899244	-0.206751
DCLRE1A	-0.722091	0.142641	-1.92721	-0.632062	0.247587	0.625131	1.44393	-0.0327523	-0.421451	1.27628
BLID	1.22067	-1.18891	0.0882578	-1.18891	-0.451555	-1.18891	1.25176	-0.100707	1.14421	0.414095
KATNA1	-0.222936	-0.149281	-0.542033	0.986691	0.702232	-2.38614	1.1299	0.43427	-0.0375782	0.0848728
GRK5	-1.3539	0.849619	-1.05851	0.00721237	-0.31216	0.582776	1.605	-0.768495	-0.675875	1.12433
ABCC5	0.202617	-0.858606	-0.465909	0.468498	-1.48633	2.11136	-0.53616	-0.317788	0.853752	0.0285688
RASGEF1B	1.12522	1.22011	0.587852	-0.139229	1.29348	-0.58855	-0.720888	-0.272229	-1.50542	-1.00035
SMARCAL1	1.81379	0.483596	-1.09508	-0.112093	-0.802459	1.12471	-0.406103	-1.43744	0.341188	0.0898921
COL19A1	-1.36851	0.143538	-0.578059	-0.901106	-1.00064	0.627116	1.6167	0.132882	-0.0614203	1.3895
PABPC4L	-0.824417	-0.660913	-0.270992	-0.496212	-0.613599	0.410918	1.91949	-0.955464	-0.0635202	1.55471
OR2D2	0.448691	-1.1943	-0.437951	-1.1943	0.0356569	1.78579	0.305725	-1.1943	0.72041	0.724583
ALPL	-0.358171	-0.0504781	0.378979	-0.31971	-0.665609	-1.79806	1.25401	0.186178	-0.408494	1.78135
LETMD1	0.408806	0.1102	-0.606417	0.646004	0.752393	1.78568	-0.361339	-1.84261	-0.868653	-0.0240687
HCFC2	1.52962	0.0694268	-1.1465	-0.777276	0.604487	-0.801242	0.270176	1.63877	-0.758405	-0.629049
MAPK11	-0.30872	0.430164	0.396233	0.270159	-0.74979	0.0993912	-1.10217	-1.73104	1.15725	1.53853
MIR573	-1.2678	-0.704461	0.288087	-0.238893	-0.144109	1.75659	1.20725	-0.981805	-0.740037	0.825171
LOC100499484	0.340774	-0.723041	-0.450941	0.0241059	1.18834	-2.16384	0.375914	1.38302	-0.0520597	0.0777346
SNORA50B	0.19973	1.81954	-0.97305	-0.97305	-0.168242	-0.97305	0.807733	1.07533	-0.97305	0.158107
MAPK8	-0.812992	-0.568156	-0.983039	-0.0208117	0.81173	-0.683508	2.1138	-0.389027	-0.496345	1.02834
EFNA2	-1.08371	-0.486099	-1.08371	0.74993	-1.08371	1.83555	0.234039	-0.223856	0.0452781	1.09629
DTX4	-0.130423	0.0811107	2.40938	-0.914832	0.0128381	-0.485354	-0.922902	0.852998	-0.215055	-0.687766
SCAF4	-0.00781192	-0.00892146	-1.27401	0.0752067	-1.16293	-0.356096	1.30966	0.153807	-0.657738	1.92884
MANSC1	1.22934	0.427719	0.619228	-0.0719396	-0.325805	-1.75118	-0.871594	-0.806883	1.52745	0.0236649
LOC648987	-0.229738	0.134535	-1.97301	0.866875	0.478373	1.29111	-0.0940475	0.861143	-0.0563751	-1.27886
POMT1	-1.22929	-0.46816	0.262674	0.282022	0.594895	-0.54427	-1.85885	0.7453	1.16079	1.05489
FARP1	-1.63474	-0.758101	0.748786	-0.323721	-1.12754	-0.205424	1.14459	0.227919	1.48986	0.438369
GPX3	1.41968	0.995546	-0.0988682	-0.240573	-0.421472	1.65705	-1.14604	-0.948205	-0.45184	-0.765273
NBAT1	-0.663901	0.52627	-0.145257	-0.641315	-0.845076	1.90805	-0.929152	1.53	-0.276677	-0.462941
ZIC3	0.0320733	-0.537908	-0.537908	-0.537908	-0.537908	-0.537908	1.81731	-0.537908	-0.537908	1.91597
GLI4	0.370168	-0.20254	-0.110146	1.07621	-1.31748	1.55471	-0.694122	-1.5655	0.151789	0.73692
PYGL	-0.65558	0.444467	0.800448	-2.32457	0.464834	1.05688	-0.0150775	-0.561684	0.823673	-0.0333961
FER1L5	-0.469138	1.01205	1.94489	0.335472	0.509453	-1.54155	-0.720833	-0.449982	-0.703937	0.0835695
LOC257396	0.0162201	0.271194	0.253127	-1.17574	-1.17574	-1.17574	-0.263534	1.94884	0.670832	0.630542
UGP2	-0.0764102	0.721281	-0.685492	1.99409	1.09729	-0.158642	-0.120999	-0.53726	-1.11259	-1.12127
SGIP1	0.849447	0.0456097	1.10839	-0.524804	1.58262	0.264602	-1.65906	-0.0178242	-0.617935	-1.03105
CYB5D1	1.68013	-0.312551	-0.162959	-0.668042	0.0199632	-2.21169	0.525165	0.468168	0.312715	0.3491
OGG1	-0.916522	0.0618566	-0.460562	-0.519709	-0.343565	1.73091	-0.72923	-0.357359	1.93404	-0.399855
THAP7-AS1	-1.24939	0.0808307	0.618503	-1.64211	0.257749	0.322084	-0.807827	1.74024	0.7081	-0.0281742
ACP5	0.662755	0.572399	0.762127	-0.154498	1.22268	-0.0259896	-1.59375	-0.157321	0.525843	-1.81425
PPIL2	-1.51154	-0.37038	0.0923969	0.17312	-0.0829543	0.348297	-0.893354	2.36	-0.19383	0.0782512
KLHDC8B	-0.848994	0.795515	0.106782	0.783611	1.15489	-0.420681	-1.68034	1.05302	0.280553	-1.22436
LONRF3	-1.09767	-0.280893	-0.953445	0.197991	0.837398	-0.184028	-0.81283	2.29643	0.220537	-0.223487
CKS2	-0.999158	-0.631088	-1.41444	0.455739	1.33985	-0.95224	0.610722	1.33225	0.635084	-0.376719
CNTFR	-0.184272	-1.46417	-0.889684	1.27985	-0.896828	1.00846	0.53537	0.625334	-0.980073	0.966019
CHAF1B	0.452385	-0.529135	-1.44051	-0.617674	0.371626	-1.2749	0.236309	1.25493	1.63024	-0.083271
DPEP1	0.630688	1.45865	0.371364	0.665379	-1.11581	-1.11581	0.767955	-1.11581	-1.11581	0.569228
C3	-0.48809	1.62927	1.14023	-1.08031	0.981514	0.119384	-1.486	0.112341	-0.391019	-0.537321
BCAS2	0.250807	-0.787986	0.241424	0.12733	-0.977358	-0.108084	0.946969	2.15537	-0.814756	-1.03372
RSBN1	0.0717836	0.869811	-0.451423	1.11013	-1.68658	-0.466754	1.02253	1.13051	-1.06082	-0.539184
VTN	0.11143	2.5971	0.150341	0.246657	-0.399536	-0.0459443	-0.891898	-0.891898	-0.331862	-0.544392
MAN2B2	1.14069	0.453569	1.1495	0.292469	-0.410622	-0.920397	-1.50223	0.224976	0.941782	-1.36975
CGB7	-0.604728	-0.604728	-0.604728	-0.604728	1.8852	-0.604728	-0.604728	0.919147	-0.604728	1.42874
ZNF532	-1.0477	-0.355342	-1.17612	-0.325109	-0.70123	0.373671	1.91562	-0.325471	0.304778	1.3369
ERICH6-AS1	-0.853501	-0.853501	-0.853501	0.690091	0.187624	-0.853501	0.306963	1.54906	-0.853501	1.53377
CCDC134	-0.862327	-0.399064	-0.413666	-0.334022	-0.0753107	-1.22488	1.81725	0.858599	-0.700206	1.33362
APOLD1	-0.193629	-1.52986	-0.490693	0.905799	0.48447	0.623685	-0.579441	1.96954	-0.510198	-0.679677
LINC01547	1.00997	-1.25958	0.420521	0.296544	-0.00176449	-2.26075	0.0994698	0.405363	0.719562	0.570671
RASL10A	1.01437	0.724132	-1.09314	0.43391	0.356572	-1.09314	-1.09314	-1.09314	1.4928	0.350768
HSPA13	0.691113	1.09874	-0.232726	-1.82867	1.09206	-1.03178	-0.080644	-0.0173848	-0.74122	1.0505
LINC01003	-0.727498	-0.214223	-0.250592	0.318067	-1.48036	0.865364	0.0366434	2.23514	-0.48398	-0.298563
WHAMM	0.546733	0.932598	0.564056	0.158464	-0.728943	0.8321	-1.94084	0.955182	-0.0618663	-1.25748
ACVRL1	-1.03436	0.0445354	1.83021	-0.0557389	1.43757	-0.673327	-1.16483	-0.776163	0.0979769	0.294132
SPRY4-IT1	0.962174	1.31807	0.360857	-1.47192	-1.43311	0.456145	1.03002	-0.519307	-0.668158	-0.034771
PBXIP1	-0.49333	0.590669	1.87231	0.548186	-1.11478	-1.03245	-0.988475	-0.683321	0.685583	0.615613
UBA5	1.22186	-1.78531	0.275646	-0.792064	-0.630746	0.0251594	-0.0262034	0.118095	1.78003	-0.186463
C19ORF71	0.769257	-0.0774935	0.607008	-1.86035	-1.00546	1.1135	-0.572345	-0.696846	0.74959	0.973141
FRRS1	-0.916063	1.01496	-0.550953	0.377282	-1.34917	-0.817947	1.79751	-0.17946	-0.295389	0.919226
HIST1H2BJ	-1.84025	-0.460162	-0.0166068	-0.0515835	1.03114	1.19939	0.89897	-1.26462	0.677726	-0.174012
TCF25	0.599975	0.253249	1.46469	1.0973	-0.717278	-0.21633	-0.685394	-1.61273	-0.979924	0.796447
HSF1	-0.00559379	-0.135064	0.226706	1.19487	-1.5834	0.194976	1.26309	-1.69555	-0.143153	0.68312
VRK2	1.27952	0.452387	-0.783491	0.034914	0.767753	-0.177093	0.558811	-2.2375	-0.49453	0.599222
B4GALT5	0.221975	-0.445288	0.100886	1.72226	-0.166688	-1.60084	-1.0085	-0.625469	1.17861	0.623059
EPB41L2	1.05924	0.245293	0.0837156	-1.76103	-0.036449	-0.966856	1.42875	0.875891	-0.98092	0.0523709
CHRNA6	-0.664706	0.361748	0.599797	1.954	-0.125629	-1.23478	-1.23478	0.508813	0.592989	-0.757448
SHANK3	-0.527223	-0.231956	0.139405	-0.153897	-0.519341	1.51917	0.628759	-1.83058	-0.467474	1.44314
AGBL1	0.153886	1.83493	1.32568	-0.255264	0.555366	-1.12083	-0.742365	-1.12083	0.0132655	-0.64385
USH1G	-0.411833	-0.411833	-0.411833	-0.411833	0.594781	-0.411833	-0.411833	-0.411833	-0.411833	2.69989
COG5	2.30777	0.728438	-0.153355	-0.0775443	-0.595116	-0.0833381	0.128615	-0.300257	-1.58376	-0.371453
ATP8A2	0.602118	-0.688356	-0.0536334	0.112338	0.532207	-1.61076	1.02115	-1.30731	-0.184031	1.57628
CCDC15	0.828373	-1.06134	-1.76287	0.332153	0.496895	-0.762512	0.884562	1.49971	-0.281875	-0.173096
SF3B6	0.54638	0.108959	-2.09296	1.20623	0.159859	-0.687643	1.23146	-0.000479318	0.367389	-0.839191
CCDC130	2.18887	0.186131	-0.0261966	-0.198018	-0.907561	0.605544	0.415036	-1.52543	-0.0758169	-0.662557
GPR137	1.38283	1.00432	0.106074	0.0194043	-0.736006	-1.66528	-1.3931	0.491661	0.754233	0.0358636
SNORD116-25	-1.21854	-0.986079	-0.0108325	-0.996048	1.56715	1.32802	-0.45243	0.398499	-0.485303	0.855562
AMACR	-0.853134	1.9316	1.09504	-0.924366	-0.951185	0.225146	-0.543404	0.725356	-0.833208	0.12816
MINPP1	-1.05312	0.434594	-0.502203	-0.564184	0.476643	-2.02689	0.747582	0.492591	0.949818	1.04517
DHRS1	-0.513712	0.249078	0.886401	0.475807	0.843132	0.275865	-2.01625	0.290027	0.896183	-1.38654
PRH1-TAS2R14	0.77724	1.59317	-0.943889	-0.943889	-0.943889	-0.943889	-0.00824927	1.51066	0.0110137	-0.108279
CT83	-0.47235	-0.47235	-0.47235	-0.47235	-0.47235	-0.47235	1.69523	-0.47235	-0.47235	2.08358
SUCLG1	1.32128	0.221109	-1.07094	-1.49735	0.647231	1.4146	-0.726994	0.0642821	0.443493	-0.81671
ADPRH	0.710133	0.203744	1.14125	-0.423638	0.312187	0.61062	-2.07791	0.23495	0.612843	-1.32418
RRP7A	-0.330371	-0.736763	0.244641	0.440077	-0.675195	-1.81696	1.81984	0.128957	-0.0757699	1.00155
ADAM19	-1.70438	0.71786	0.899589	-0.212104	1.35646	0.031044	-0.0688101	-0.104378	-1.56445	0.649169
ANAPC7	0.18855	-0.398375	-1.67924	-0.14523	1.35224	0.128923	1.66548	-1.04678	-0.384861	0.319295
OBSCN-AS1	0.0597164	0.706535	-1.69334	-0.718953	-0.845587	-0.809022	0.260836	1.4281	0.395303	1.21641
C6ORF163	-0.101104	-0.891043	-0.114529	-1.09727	0.505081	2.33608	-0.469749	0.640762	-0.796849	-0.0113854
TMEM251	-1.44873	0.497541	-0.693344	0.809096	0.903591	0.465576	-1.0524	0.626271	1.16675	-1.27435
BCL7C	1.35328	0.056918	0.10691	0.149414	-0.208019	0.239601	-1.00271	-2.15218	1.13615	0.32063
TMEM229B	0.828929	0.472597	1.2499	-0.397439	0.19191	-0.09153	-1.92692	0.696077	0.383438	-1.40696
ZDHHC5	0.648559	0.576253	-0.412129	0.983361	-0.130381	-0.336808	-1.21361	1.25114	0.543243	-1.90963
ELF1	-0.451735	1.38577	0.928179	0.630889	-0.729894	0.59599	-1.612	0.716748	-0.210317	-1.25363
SMIM17	-0.464934	-0.648303	-0.662639	0.321558	0.012449	0.865322	-0.775538	-0.144476	2.38075	-0.884192
SNRPD3	-1.91979	-0.746771	-0.981798	0.125885	0.703936	0.448967	1.0514	1.20017	-0.454343	0.572349
KCTD15	0.641121	-0.8726	0.982703	-0.0874143	-0.738744	1.32357	-0.605703	-1.24036	1.41065	-0.813219
RAB3IP	1.28826	0.486409	0.0298149	-1.01265	0.311078	-1.13075	1.48323	-0.719813	-1.29338	0.557797
SHMT1	2.05106	-0.244616	0.543886	-1.41105	0.232323	0.241302	-1.14281	0.603438	-0.812647	-0.0608835
ZSCAN16	-1.05122	-0.432577	-0.133505	0.836789	1.30253	-1.52276	0.0645373	1.13654	-1.01079	0.810448
ALG1	0.577423	-0.00827533	0.156551	1.31291	0.307139	-1.01352	-0.203413	-2.25241	0.721132	0.402456
SCHIP1	-0.595718	-0.595718	-0.595718	-0.595718	0.820824	-0.595718	1.33291	-0.595718	-0.595718	2.01629
LOC100130744	0.422736	-1.14955	1.34854	-1.05054	-0.342294	1.12731	-0.249705	-0.588022	-0.91371	1.39523
PNISR	-0.0454254	-0.100694	0.172664	-1.39512	0.106358	-0.211533	0.972501	1.03346	-1.81533	1.28311
KCNA4	-0.331416	-0.265976	-0.122066	-0.637337	-0.427402	-0.637337	2.13627	-0.637337	-0.637337	1.55994
TNFAIP1	-0.153989	0.708073	0.603264	0.73354	-0.414043	-1.37434	-1.38144	1.05487	1.22254	-0.998467
ZNF525	-0.151532	0.178823	-0.503161	1.28178	-1.42421	1.50619	-1.44659	0.603132	0.361567	-0.405987
NSDHL	1.51006	-1.72869	-0.0259727	-0.706183	0.315138	1.15696	-1.08569	0.58789	-0.378835	0.355321
LOC643339	0.345217	-0.109343	-0.276433	0.317695	-0.762532	-2.20481	1.12077	1.22687	-0.291788	0.634355
ASPM	-0.0940625	-1.11397	-1.13083	-1.02019	0.776851	-0.362704	1.28722	1.21406	-0.634448	1.07807
COL6A5	-0.86136	1.14975	1.94962	-0.86136	0.90301	-0.86136	-0.660432	0.0216339	-0.171367	-0.608129
CCDC178	-0.470357	-0.470357	-0.470357	-0.470357	-0.470357	-0.470357	2.15581	-0.470357	-0.470357	1.60705
AOX1	-0.988919	0.5435	0.48723	-0.828914	2.11032	-0.326885	0.573925	-1.36137	-0.241054	0.0321656
MT1F	-1.41349	0.13451	0.39216	0.474905	-0.209647	0.947921	-1.18395	1.75734	0.169541	-1.06929
COPZ2	1.94471	-0.100284	0.375662	-0.729486	0.160807	0.433657	-1.67346	0.77132	-0.25545	-0.927477
DAAM1	-0.346293	-0.705682	-0.340118	-0.223041	1.07038	0.390253	-1.04477	1.46631	1.21581	-1.48285
HEXB	0.43187	1.29466	-0.0335441	0.636147	0.509848	-0.569401	-1.54907	0.287129	0.752697	-1.76033
TMCC1-AS1	0.742109	-0.742984	0.325346	0.0360908	-2.31141	1.02821	0.317771	-0.545976	0.169839	0.981005
SART1	0.557843	-0.794329	0.172142	-0.734277	1.21897	-1.40115	1.02701	-1.19962	-0.0869691	1.24038
STK32B	1.07788	-0.558585	-1.0606	0.526184	-0.740534	-0.678088	1.36054	-1.42611	0.517942	0.981374
ATP6V0D1	0.077905	0.0308651	-0.223307	1.23097	-0.513565	1.08123	-1.7675	-0.235347	1.33512	-1.01638
RHD	0.122516	0.427038	-0.980977	-0.980977	-0.474327	2.42701	-0.188947	0.511811	-0.646605	-0.216541
MIR502	-0.843926	-0.843926	1.48966	0.317289	1.58041	-0.843926	-0.843926	0.787051	0.0452226	-0.843926
OSBPL3	-0.842393	0.4448	-0.0664255	0.426902	2.00245	0.54467	-0.429642	-1.82376	-0.295321	0.0387278
ADAMTSL3	-0.559289	-1.25758	0.964532	0.050188	-0.323018	1.28466	0.194303	-1.72023	0.189434	1.177
AGAP2-AS1	1.19133	0.0259888	0.0776964	-0.714269	0.576542	-0.00414873	-1.26101	-0.6215	1.86285	-1.13348
LENG1	-0.44756	-0.370813	1.84956	-1.02953	1.06161	-1.07331	-1.17399	0.58062	0.351456	0.251952
MASP1	0.468054	-0.74812	0.20538	-0.811049	1.58581	0.702018	0.338287	-0.723204	-1.80451	0.787335
TBC1D20	-0.676539	-0.0933113	0.374629	1.79136	-0.743249	0.995669	-1.42598	-0.922134	0.855766	-0.15622
TIMM17B	0.76521	-0.985405	0.99838	0.699402	-1.75624	-1.20805	-0.213085	0.880087	0.768895	0.050807
FAM30A	-0.577603	0.770362	1.80127	0.249687	0.985967	-1.10601	-1.10601	0.289322	-0.20099	-1.10601
RAB29	-0.868273	0.948776	0.715118	1.07355	-0.0831952	-1.72522	-1.3997	0.746389	0.354997	0.237558
DYM	-1.09695	0.0878019	-0.620586	-0.0181205	0.268615	1.14963	0.75863	1.42051	-0.104118	-1.84541
MTMR11	-0.769048	1.89529	0.263391	-1.04205	-0.185373	-1.1061	1.45833	0.148131	-0.198637	-0.463932
SELL	0.447629	1.58667	1.0115	0.115232	0.543037	0.302787	-1.68486	-1.15879	-0.604567	-0.558649
TMEM191C	0.240329	-0.982832	-0.982832	-0.982832	0.464754	-0.982832	-0.0467474	1.75057	1.3255	0.196918
PDCD7	0.0287429	-0.100449	0.147429	-0.680551	0.121115	0.489775	-0.373748	-2.19252	1.16718	1.39302
MRPL52	-1.45601	-0.287119	0.959451	0.727579	1.16729	-0.121938	-0.56811	0.470876	0.784425	-1.67644
BIRC5	-0.520369	-1.21645	-1.38496	-0.704344	0.567395	0.105772	1.67888	0.795851	-0.301248	0.979472
SELENOT	0.075546	0.199659	1.17402	1.14233	-0.213537	-1.1267	-1.9437	0.69986	0.582917	-0.590395
AKAP12	0.846163	0.609949	0.183525	-0.99247	-1.68484	-1.33225	1.02643	0.944602	-0.157178	0.55606
ZBTB3	-1.97924	0.401857	1.01618	0.926043	-0.35737	-1.18074	0.240791	1.16895	0.0501549	-0.28663
RAD50	1.39089	-0.0234969	0.255007	-1.56553	0.559903	0.980379	-0.545664	0.955446	-1.16128	-0.845656
NDUFAF5	1.38756	0.803004	-0.27998	0.0373974	0.641131	-0.280857	-0.817567	-1.97071	-0.53226	1.01229
SNORD44	-0.737817	-0.553048	-1.08995	-0.161856	1.0737	-0.0846698	0.889764	-1.1822	-0.0470972	1.89317
PEG3	-0.782327	-0.646626	-0.704174	0.514813	-0.864729	1.72366	1.66936	-0.140173	0.0552745	-0.82507
ARHGAP20	1.119	-0.213595	0.814526	-1.35429	0.119445	-0.660008	0.328403	1.36017	-1.66548	0.15183
INTS2	0.382491	0.29848	-2.09233	-0.345018	1.47189	-0.356797	-0.431082	1.00385	-0.589458	0.657977
PEX11B	0.936832	1.01122	0.315272	0.664159	0.0402835	0.37308	-1.63467	0.399224	-0.224877	-1.88052
SLC12A1	0.462872	0.165436	0.142182	-0.131987	0.395174	-1.69693	1.14146	-1.69693	-0.00704212	1.22576
ZNF692	0.456421	1.04019	0.0499244	0.423207	-1.93064	-0.182981	1.2759	-1.21922	-0.526051	0.613244
MRPL53	2.038	-0.0119931	0.497264	0.3729	-0.299358	-1.93004	-0.177563	-0.72834	0.285075	-0.0459426
CSRP1	2.1234	0.507648	0.481351	-0.0997583	-1.04252	-0.420903	-1.28901	-0.130503	0.656544	-0.786251
KRT14	-0.55139	-0.368233	-0.37052	-0.55139	1.8873	1.89642	-0.55139	-0.55139	-0.433543	-0.405863
SNORD94	-0.795921	0.966209	0.325241	-0.782807	-0.222627	2.14703	-1.02814	-0.950276	0.306149	0.0351386
NDUFB2-AS1	0.57042	0.483569	0.44724	-0.606963	-0.70709	2.20119	0.249459	-1.1906	-0.732609	-0.714618
ACSM5	2.59259	-0.148024	-0.20799	-0.34553	-0.00756306	0.552241	-0.818068	-0.227172	-0.470123	-0.920356
HCN2	1.61693	-1.07129	0.0761448	1.14448	-0.344149	0.280425	-1.12138	-0.860394	1.05842	-0.779184
HIVEP3	1.6092	0.811381	1.03721	-0.24984	0.474006	-1.49912	-0.920339	-0.542616	0.248875	-0.968753
LILRB1	-0.455931	1.06619	1.61451	0.286692	0.765265	-0.0309339	-1.41375	0.206846	-0.658915	-1.37997
NOC2L	1.0264	-1.05603	-0.870028	0.292587	-0.521122	-0.800502	0.594612	2.04478	-0.735573	0.0248758
NDP	2.3967	-0.162341	-0.169481	-0.734148	-0.410898	-0.734148	0.804819	-0.734148	-0.734148	0.477791
PIEZO2	0.74699	-1.77918	0.164734	0.566706	0.253855	-1.27769	1.04331	-0.415591	-0.580886	1.27775
SNORD12C	-0.173976	-0.290265	-0.702741	0.438205	0.838449	-1.69972	0.584707	-1.09723	0.398856	1.70372
DIRC3	1.50146	0.241717	-1.3141	-0.00675008	0.202714	0.818366	0.375714	-1.3141	-1.3141	0.80907
KIAA1522	-0.0646968	-1.2672	0.132458	0.259967	0.0464644	-1.2662	-0.608931	0.940614	2.09147	-0.263946
GORASP1	-1.21945	0.555644	1.1014	0.342624	0.656676	-0.189077	-1.82652	0.731518	0.79646	-0.94927
EFNB2	-1.34203	-0.773309	0.601127	-0.00312823	0.197158	0.0328579	0.948232	1.36916	-1.71823	0.688161
GMDS-AS1	-0.294147	-0.780905	2.07779	0.565761	-0.00888622	0.348725	-1.11865	0.556518	0.0608778	-1.40708
NACA	-0.286731	-0.239548	-1.20671	-0.275495	0.0906944	0.0766833	1.67094	-0.567834	-1.03233	1.77033
HERC5	0.298886	1.0161	0.0302836	1.3302	-1.18777	-1.15836	-0.886786	1.20307	0.352861	-0.99849
FBXO16	0.531463	0.159393	0.592381	-0.0958116	-1.27411	-2.0024	0.691061	0.943751	1.01061	-0.556326
GPN3	0.105071	-0.337359	-0.858539	0.128419	1.32617	-1.57386	1.09429	1.33331	-0.317651	-0.899845
PLEC	0.315578	-0.827113	0.184836	0.7567	0.478967	0.468188	-0.625061	-2.33025	0.571284	1.00687
ATN1	0.745808	0.335722	-0.317677	-0.617402	-1.67349	-1.09547	0.795276	-0.228491	0.30305	1.75267
LOC105369147	-0.618417	1.0799	-0.540293	1.85905	-0.45892	0.239973	-0.463085	-0.583385	0.914737	-1.42957
PIGV	-0.255227	0.199811	-0.453048	1.0162	0.187839	1.5638	-1.56867	-0.134409	0.849411	-1.4057
KLHDC7B	-1.18984	1.29558	1.10865	0.796799	0.841534	-1.18984	0.329922	-0.589762	-1.18984	-0.213206
ZNF654	-0.751161	0.657452	-0.0641314	0.295443	0.88037	-1.39449	-0.956616	1.7868	0.473812	-0.92747
GAN	-0.0257315	-1.53011	-0.26217	1.02338	0.819013	-1.4103	0.386784	0.591444	-0.8685	1.27618
RAC3	-0.792537	-1.489	-1.45919	0.671158	-0.156283	-0.0379057	1.25636	0.0276452	0.918101	1.06165
HIST2H2AB	-0.334337	-0.358184	-0.497725	-0.616007	0.208538	-1.48955	1.98385	-0.393924	0.174813	1.32253
B4GALT4	0.242331	-0.342144	0.513619	-0.298016	0.156589	-1.76528	-1.36494	1.29483	1.31522	0.247793
PCDHA12	-0.851987	-1.44794	-0.0800789	-1.17122	-0.665354	0.407185	1.26483	0.80052	0.408653	1.3354
DCAF4L2	0.14703	1.49588	-0.829562	0.166608	-0.829562	-0.829562	1.68794	-0.829562	-0.829562	0.650354
WDR90	-0.517164	-0.422679	0.305356	-0.496577	-0.0854472	0.584505	0.760466	-2.24602	1.0493	1.06826
MIR493	0.900191	-0.917358	-0.917358	0.935972	0.526585	-0.917358	0.69047	-0.917358	-0.917358	1.53357
CAMK2B	-1.30817	-0.121609	0.0369757	1.10723	-0.631466	-1.30817	0.682046	-0.488964	0.252023	1.7801
WASL	1.99161	0.77556	-0.192994	-0.0413985	-1.159	-0.749858	0.285663	0.809856	-0.491117	-1.22833
CABP1	0.0062532	-1.33066	0.268875	0.988731	0.691736	-1.33066	-1.33066	0.328011	0.309749	1.39861
ANTXR2	0.665987	0.947826	0.94291	0.0980373	1.02851	-1.60127	-0.268674	-1.47063	-0.820895	0.478199
LCA5	-0.308617	0.0360691	0.103746	-1.98826	-0.200091	-0.377058	1.34483	1.4602	-0.673396	0.602574
DDX3X	1.31487	0.437572	0.329313	-1.79963	-1.34484	-0.528873	1.0965	0.487725	-0.315686	0.323065
ZNF595	0.364984	-2.14639	-0.215113	0.344975	-1.20529	0.291248	0.817015	0.913038	-0.176682	1.01222
ARID1A	-0.801119	0.613747	-1.64286	0.756489	-1.14825	0.340244	1.75674	-0.146662	-0.120575	0.392246
FAM126A	-0.991315	0.289618	-1.05842	-0.0197626	-0.315515	1.51238	-0.894082	1.88045	-0.269112	-0.13425
TXLNGY	-0.555066	-0.329821	-0.332633	-0.555066	1.83735	-0.555066	-0.555066	-0.555066	1.93678	-0.336343
LOC101928100	0.805865	0.307488	1.96713	-1.1776	0.482814	-1.1776	-0.50441	0.562845	-0.690474	-0.576057
SNRPD1	-1.26606	-1.45125	-0.754375	-0.100902	0.526982	0.360733	1.89514	0.431919	-0.301577	0.659387
TNK1	-0.255808	0.561963	1.24015	-0.0323506	0.265138	-0.872007	-0.118896	-2.16631	1.23331	0.144807
NOTCH4	-0.430117	-0.930505	0.847003	1.52878	-0.384088	1.28788	-1.62725	-0.133768	0.373849	-0.531787
KLRC2	0.0281764	1.5269	0.357701	0.64907	1.43581	-1.50359	-0.268087	-0.960587	-0.655286	-0.610099
ZNF275	1.78067	-0.0682347	0.723166	-0.980709	0.109841	-0.973457	0.210969	-1.52008	-0.260495	0.978322
CLMP	-0.10181	-0.240506	0.0936687	-0.90588	0.860219	-0.411326	1.80278	-1.26469	-0.995519	1.16307
NOB1	0.240175	-1.0786	-0.142534	-0.0564901	-1.13614	1.78946	0.486881	-1.22626	1.22904	-0.105533
ZNF192P1	0.233991	-0.961543	-0.961543	0.754942	-0.14112	-0.961543	-0.961543	1.71012	-0.0277642	1.316
PROM2	-0.936858	-0.851873	0.0261053	-0.471595	0.568287	2.17307	0.63796	-1.1275	-0.483111	0.465514
AMMECR1L	-0.651195	1.48147	-0.798114	1.03309	-0.616317	-0.284271	0.479668	-1.3733	1.32222	-0.593262
PDE4C	-0.750973	-0.763133	-0.220759	-0.304436	-0.14648	2.18494	-1.31438	-0.191498	0.659944	0.84678
GTF2E1	0.470477	-0.546353	0.0347285	0.8459	0.489632	-1.59388	-0.183416	-1.49967	1.59761	0.38497
SYT3	-0.122001	-0.970372	0.0466158	-0.970372	0.836325	-0.970372	1.73722	-0.970372	0.170951	1.21238
F13B	0.257549	-0.7908	-0.7908	-0.7908	0.449899	-0.7908	1.14875	-0.7908	0.0280184	2.06979
APOB	-0.597323	1.94194	0.784977	-0.597323	1.45435	-0.597323	-0.597323	-0.597323	-0.597323	-0.597323
RUNDC3A	2.25245	-0.831583	-0.0844492	-0.713245	-0.290041	-1.47914	0.0474533	0.503929	0.213198	0.38143
PLPBP	0.555776	0.466049	0.755906	-1.11401	-1.58511	0.820817	0.826651	-0.202042	0.881158	-1.4052
PER2	-1.43572	-0.356483	0.398819	-0.920933	0.396551	0.817431	1.50284	-1.03425	-0.535955	1.1677
NTPCR	0.238285	-1.09644	0.942203	0.298047	0.0874174	-2.14046	0.720223	-0.60515	0.97791	0.577959
SHC1	0.606459	1.39808	-0.596	0.792687	0.40999	-1.09484	-0.784948	-1.54984	1.10713	-0.288727
TTF1	-1.50573	-0.861714	-0.73567	0.063294	-0.238514	1.14655	1.06279	0.144153	-0.654621	1.57946
ZBTB18	0.522126	0.141198	0.349797	-1.84312	-0.841089	-0.708363	1.18897	-0.0836028	-0.297434	1.57152
PPFIA1	0.10806	-0.876749	-1.31797	-0.501332	-0.716076	0.803343	-0.117333	1.79573	1.27622	-0.453885
MBLAC1	-0.0810261	-1.15311	1.26353	-0.282746	-0.521839	0.0583006	0.102061	-1.36694	0.0241924	1.95757
POLR3E	0.101679	-0.885597	0.0371113	1.35438	-1.04266	0.519772	0.594862	-1.89391	0.198372	1.01599
IL1RL1	0.852288	0.305863	-1.3885	-0.555635	1.83427	-1.3885	-0.507184	0.250762	0.0218893	0.574737
SSUH2	-1.14927	0.0488411	0.606743	-1.14927	0.665555	-1.14927	1.20405	-0.253494	-0.416538	1.59265
M6PR	-0.725131	0.609456	0.215712	0.211527	0.631394	0.0920714	-1.93316	0.616507	1.45373	-1.17211
LOC102724265	-0.450495	1.13783	-0.450495	-0.450495	2.46613	-0.450495	-0.450495	-0.450495	-0.450495	-0.450495
JUP	0.310551	-1.58161	0.075651	0.855118	0.447921	1.74294	-0.43504	0.200469	-1.47564	-0.140363
RPL35	-0.0303825	-1.72824	-0.831514	1.02902	1.12951	0.549878	-0.360458	-1.18752	0.961491	0.468215
LNX2	-0.0957887	-0.491989	1.46142	0.186364	1.61533	-1.0633	-0.985702	-0.158369	0.696656	-1.16463
RAB40C	0.296279	0.0124259	0.565834	0.24661	0.0972325	-2.69461	0.360015	-0.309649	0.616249	0.809611
CDC42SE2	-0.368503	1.57606	1.11261	0.207244	0.49328	-0.0254202	-1.04442	0.591297	-0.968019	-1.57413
LRP4	-1.28364	-0.00034116	0.362215	-0.571879	-1.17207	-1.24065	0.999578	1.30096	0.808929	0.796892
ZNF330	0.195245	-0.144758	-0.299512	-0.342048	0.299798	0.53014	-0.684922	1.71344	0.807688	-2.07507
FLJ42393	-0.735657	-0.088526	-0.0286175	0.531171	-0.972188	-1.92787	0.889667	0.225045	1.52485	0.582117
NAA38	1.23263	-0.52533	0.179263	-1.07299	-0.209902	0.492462	0.700906	-1.83127	-0.305993	1.34022
NDST1	1.11605	-1.02047	0.972082	1.31865	1.03689	-0.495488	-1.25956	-0.211047	-0.818086	-0.639022
KMO	-0.293228	1.56302	1.03231	0.651627	0.645247	-0.63276	-1.0949	0.455111	-1.00211	-1.32432
MEP1B	0.135628	0.933193	-0.995104	-0.995104	0.343094	-0.995104	1.80239	-0.995104	-0.11194	0.878048
SEPT7-AS1	0.462837	0.705183	-0.67009	-0.67009	-0.67009	-0.67009	0.552777	2.29974	-0.67009	-0.67009
WNT6	0.119419	-0.265259	0.0948027	-0.413645	-0.0299028	2.62557	-0.185235	-1.1944	-0.596571	-0.154786
MAN2A1	-0.715829	1.559	-0.0400838	-0.0668316	1.01427	-0.297589	-0.179293	-0.705208	1.17228	-1.7407
RNF41	-0.779797	0.447829	-0.78985	0.684782	-1.20662	-0.380185	0.832064	-0.488993	-0.415435	2.0962
ACTG1P20	0.424274	-0.474465	0.232324	0.652999	0.214273	-1.82484	0.874076	-0.983166	-0.701573	1.5861
ARSG	-2.02827	1.0801	-0.589575	1.03434	-0.208096	-0.912063	0.273355	-0.249666	0.729187	0.870684
ZNF555	-1.11899	-0.831979	-0.442349	-0.959983	-0.438891	1.38254	0.456205	0.97258	-0.558211	1.53908
PPIEL	1.40718	-1.5146	-0.144292	-1.62613	0.00443379	0.858775	0.00729321	0.0471677	1.13581	-0.175641
PRR14	0.404738	-0.0595488	-0.301757	1.64733	-0.328584	1.4342	-0.942612	-1.7217	-0.038857	-0.0932073
TAF1	2.15817	-0.868841	-0.120664	-1.25918	-0.280677	0.912824	-0.312022	-0.307133	-0.624785	0.702314
CAMSAP2	0.984262	-1.06468	-1.62438	-0.412204	0.229049	-0.557356	0.452121	1.77961	-0.300528	0.514106
TP53BP2	-0.322622	-0.0577832	-0.457207	-0.444906	-1.10435	-0.710697	2.13629	-0.121539	-0.351949	1.43476
TIGD6	0.34504	0.0920999	0.933116	0.483182	-0.570949	1.87217	-0.65482	0.0172703	-1.67104	-0.846063
TIGD1	-0.112679	0.292689	-0.680706	0.177286	0.486847	-1.84945	1.05545	-0.922364	-0.112025	1.66496
CENPJ	-0.610116	-1.33329	-0.125726	-0.388612	-0.475463	1.03938	1.68907	-0.845042	-0.26844	1.31824
VAMP8	0.52825	0.46659	0.561588	0.328546	0.540643	0.430654	-1.86802	0.351095	0.573804	-1.91315
CEP85	-0.507507	-1.15742	-1.09323	1.30508	0.28342	-1.45875	1.02334	0.33387	0.229725	1.04147
MUC15	2.57766	-0.00213695	-0.236697	0.0186655	0.476458	-0.0213591	-0.437391	-0.791732	-0.791732	-0.791732
C4ORF33	0.2484	0.0083331	0.606274	0.406071	0.601738	-2.40155	-0.236235	1.16279	0.430593	-0.826414
PGLS	1.53605	0.586092	0.127675	1.15308	-0.553069	-0.211374	-1.10892	-0.500671	0.623752	-1.65262
CRISPLD2	-0.71669	1.33135	0.681783	-0.068457	1.57463	-1.23972	-1.29349	-0.556242	-0.176229	0.463063
PDE3A	-1.6082	0.416954	0.280577	0.677605	-0.177162	2.1039	-1.004	-0.442656	-0.19332	-0.0536953
NAT16	1.45346	-0.746988	0.470566	-0.746988	-0.746988	-0.746988	0.0332708	-0.746988	-0.182385	1.96002
FER1L4	-0.203731	1.09723	0.94801	-0.412944	0.481925	-2.1278	-0.554253	-0.578795	0.244108	1.10624
SPATA22	0.227627	-1.21303	0.884732	0.256243	1.66577	-1.21303	-1.21303	0.841534	-0.413737	0.17693
CARD19	0.979858	0.0422268	0.0948314	0.960278	0.905665	-0.057113	-1.97571	-0.684904	0.835888	-1.10102
IL1RAPL2	-0.56163	-0.56163	-0.56163	-0.56163	0.400319	-0.56163	2.21133	-0.56163	-0.56163	1.31975
JADE2	0.619147	1.1849	1.00794	0.172128	0.0108082	-0.298641	-1.88665	0.249782	0.443626	-1.50304
LIPM	-0.316228	-0.316228	-0.316228	-0.316228	2.84605	-0.316228	-0.316228	-0.316228	-0.316228	-0.316228
MT1G	-0.512098	-0.645282	0.954581	0.728368	-0.836647	0.15409	-1.06504	2.1424	-0.524082	-0.396289
TAB1	-0.533431	-0.572305	1.49308	0.193188	-0.830173	-1.05691	0.516821	1.55054	0.442495	-1.20331
COL3A1	-1.42799	-1.04521	0.634045	-0.683499	1.28867	0.747602	0.262501	-1.04529	-0.00286495	1.27204
CCDC28B	0.280479	-0.0567484	0.8015	0.327943	0.289308	-2.43933	-0.623953	1.19944	0.485954	-0.264593
ZNF613	-0.762169	-0.643324	0.162039	1.46415	-1.25027	1.29537	-0.559759	1.32327	-0.515537	-0.513762
VENTX	1.16934	0.388764	1.54184	-0.756304	0.689798	-1.61443	-0.706383	0.0745568	-0.957359	0.170184
DDX12P	-0.0696861	-1.83057	0.406867	-0.193727	-0.782252	-0.432516	0.918798	-0.554951	0.902211	1.63583
TMEM44-AS1	1.1666	-1.32234	0.415876	-1.32234	0.0818378	1.09025	-1.32234	0.755102	-0.189795	0.647139
TMEM143	0.452478	-0.809536	0.786729	0.260993	0.0825541	1.56436	-1.01541	-1.51676	1.00512	-0.810526
SHPRH	-0.745743	-1.00008	0.347787	0.322604	0.13042	1.69393	0.0881304	0.835767	-1.8916	0.218784
CSNK1A1L	1.67753	-1.11978	-1.11978	0.438323	-0.0688655	-1.11978	1.18689	0.775667	-0.27216	-0.37805
PAX7	0.938238	-0.718786	1.0025	-0.718786	-0.718786	-0.718786	1.96111	-0.718786	0.410865	-0.718786
BNIP3L	-1.61521	0.0375741	0.555837	-0.574795	-0.4794	0.126086	1.69708	-0.114258	1.3114	-0.944307
TCTN1	1.36805	0.737386	-1.24245	-1.14296	0.140881	1.34948	-0.643085	0.271065	0.307187	-1.14555
LINC00634	-0.76296	-0.76296	-0.76296	-0.17478	0.023352	-0.76296	1.28283	-0.17604	-0.12782	2.2243
ATP8B3	-0.339067	0.145533	-0.025417	1.53	0.333481	0.625522	-1.53789	-0.394424	1.14303	-1.48076
SNORD42A	-0.714724	0.0156979	-0.871578	-0.693741	-0.0984272	2.57608	0.504487	-0.460481	-0.354984	0.0976652
PEMT	-0.286302	-0.866092	-0.0450513	0.195519	-0.0812872	1.44934	-0.325528	-1.40198	1.90998	-0.548598
LINC02175	-1.47046	-0.0189455	-1.47046	0.935211	0.95019	0.519048	-0.555367	0.242669	-0.536527	1.40465
MRPS11	0.287261	0.641971	0.416528	0.689849	1.30367	-2.41611	-0.404623	-0.0959877	-0.0430193	-0.379543
SNORD116-8	-1.52572	0.128461	0.0221399	-0.853061	1.59156	0.750562	-1.16021	0.321568	-0.385651	1.11034
ZNF764	0.327376	-0.00951639	1.08277	-0.252327	-1.37378	0.657314	0.0680996	-1.04508	-1.1578	1.70294
DDI2	-0.212003	1.94829	-0.966447	0.991805	-0.916227	-0.110322	-0.898815	0.437843	0.685348	-0.959475
HGS	0.514323	-0.602957	-0.67139	-0.00628419	-0.380194	-1.30804	1.72984	-0.404632	-0.501125	1.63046
LOC105371795	2.02591	-0.0211779	-0.0381319	-0.238024	0.481298	-1.379	-0.171649	0.866693	-0.146929	-1.379
PTPN18	0.647748	1.47445	-0.000122891	-0.397335	-0.566154	-0.60157	-1.07383	-1.03643	1.80923	-0.255989
GFI1	0.462714	1.89137	1.12626	0.0151302	0.192288	-0.952419	-1.16981	0.203971	-0.784169	-0.985327
CHMP1B2P	1.42378	1.26446	0.687635	-0.761428	-0.761428	-0.761428	-0.761428	-0.761428	1.19269	-0.761428
CFL2	-0.335771	0.00335469	0.697362	-0.422071	0.31958	-1.35733	0.222888	2.25674	-0.394882	-0.989869
PKMYT1	-0.82685	-0.764205	-0.731129	0.559004	0.840225	-0.785196	0.865044	-1.42433	1.46167	0.805771
MIR554	0.480059	-0.494239	-0.513953	-0.206817	0.676814	-2.09332	0.123997	1.17637	-0.473594	1.32468
LOC100507156	-0.0920982	0.162622	2.10769	-1.28287	-0.465716	-1.28287	-0.371574	-0.0708283	0.774035	0.521612
ZFYVE28	-0.290744	1.38922	1.1234	0.724101	0.0210343	-0.58841	-1.88709	0.177058	0.385634	-1.0542
MZF1-AS1	1.72446	1.10782	-1.52111	0.0870175	0.181122	-1.52111	0.276442	-0.125023	-0.0126468	-0.196974
LYN	-1.59543	0.854051	1.54557	0.259456	0.945684	0.385479	-1.06211	0.0497717	-0.955828	-0.42665
MRPS14	0.8789	-0.567017	-0.696337	-1.28489	0.0458103	-0.941678	1.47891	-0.518193	0.0477792	1.55672
LEAP2	1.39327	-0.333995	-0.350791	-0.549378	0.231909	-1.69637	0.192727	1.18351	-1.0724	1.00152
TARSL2	1.33967	0.633946	-0.260753	0.345363	0.268167	0.170761	-0.301674	-2.52382	0.148825	0.17952
KCNH7	-0.396511	-0.396511	-0.396511	-0.396511	-0.396511	-0.396511	0.421747	-0.396511	-0.396511	2.75034
DLD	2.21798	-0.00412842	0.0486511	0.0210177	0.838182	-1.35824	0.195937	-0.383857	-1.0152	-0.560347
SLC39A14	0.368556	-0.311314	0.459615	-1.56895	-1.0651	-0.546472	1.08508	0.602405	1.638	-0.661821
HSD17B14	0.535208	0.771821	0.661528	0.549712	0.0801246	0.386469	-2.06629	-0.35306	0.872266	-1.43777
RELN	-0.147026	-0.518379	0.0309171	-1.24706	-0.0882173	-0.190714	2.27031	-0.761415	-0.436793	1.08838
CAMTA2	1.72739	0.818765	0.573789	0.418408	-0.427625	-1.1497	-1.18448	-0.204032	0.643326	-1.21584
PABPC5	1.05116	-0.397095	0.617323	-1.64159	-1.79823	0.784598	0.390455	0.798557	0.0581012	0.136729
PODN	-1.64194	0.634758	1.11235	-0.417669	1.20162	1.07125	-0.983903	-0.956391	0.0763752	-0.096451
FAM177A1	-0.936861	1.34836	-0.793481	0.138063	0.0558077	1.07467	-0.809323	-0.112471	1.40131	-1.36608
RASA4B	-0.175817	-0.253767	1.26069	-0.209499	0.643348	-2.05572	0.568015	-0.526805	-0.560775	1.31033
PDE12	-0.528654	-0.183747	-0.0536795	0.277462	1.50776	0.00914069	-1.18483	0.947578	0.968097	-1.75913
ZNF780B	1.74889	-0.0972245	-0.0944026	-1.40938	-0.155274	0.97259	-0.125238	-1.01714	-0.886271	1.06344
MED30	-0.757982	-0.330738	-0.371534	-0.828327	0.00469827	0.39856	2.10596	-0.927073	-0.592557	1.29899
WDR7	-1.56679	0.728761	-0.0362283	0.137589	1.35193	0.59879	-1.05306	1.0965	-0.0347345	-1.22275
ANKRD12	-1.33385	0.452338	-1.09485	0.441867	0.788456	0.718324	0.691087	1.36821	-0.826879	-1.2047
DAGLA	0.117835	-0.870903	-0.431782	-1.26412	-0.63631	-0.679236	1.51932	0.417478	0.0700346	1.75768
PPP1R3F	1.2886	0.741669	1.48356	-1.06958	-0.410963	-1.02764	-1.29683	-0.347642	-0.00684892	0.645682
RGMA	0.489419	-0.0313552	0.770463	-0.971344	0.388831	-0.834614	1.17263	-1.34254	-1.07231	1.43082
TMEM196	1.95153	-0.597881	-0.597881	-0.597881	-0.597881	-0.597881	0.804795	-0.597881	-0.597881	1.42884
ALPK2	-1.54064	0.480609	0.990372	-0.755412	1.60451	0.773101	-0.685673	-0.399927	-0.916365	0.449428
ACKR1	-0.236746	0.220273	1.16592	-0.388322	1.85383	0.00187468	-1.05758	-1.57757	-0.403889	0.422206
RETREG1	0.889442	0.00791779	-0.484121	-1.15023	0.0823115	-1.77622	0.120103	-0.273092	1.11528	1.46862
CCNY	-1.45841	-0.171692	-1.00699	1.05226	-0.378081	-0.6782	1.44064	0.671158	1.11712	-0.587805
MTIF3	0.00230449	-0.318569	0.459826	0.307186	2.11247	0.596858	-0.814167	0.138159	-1.18424	-1.29982
GALNT3	0.814889	-0.0225871	-0.714826	-0.335371	0.928476	-1.55769	-0.849592	1.54676	0.898471	-0.708526
ZC3H10	-0.317574	-0.466198	0.665123	0.604698	0.343582	-1.78737	0.192906	-0.286189	-0.86905	1.92007
EPRS	0.912401	-0.291952	-0.787427	0.403247	-0.502394	-1.79815	1.78452	-0.016717	-0.392656	0.689126
SMAGP	-0.722648	0.571998	-0.406257	-0.388519	1.10772	-1.78508	0.947552	-0.663199	-0.10139	1.43982
LOC101929243	-0.311591	2.01676	-0.0656053	-0.28678	-1.54923	1.32773	-0.602065	-0.289484	0.11578	-0.355515
SNPH	-0.396408	-0.877426	0.599057	-0.765305	0.517484	-1.2354	-0.736528	1.0516	1.91844	-0.0755119
PDS5B	-1.2366	-1.05099	-0.242209	-0.770829	1.59781	0.345507	1.37855	0.0808145	-0.802313	0.700266
PMS2P1	2.44078	-0.173121	-0.390608	-1.18037	-0.270138	-0.0534505	0.236616	-0.502517	-0.787318	0.680124
CXCL12	-1.34268	1.09854	0.570585	-0.341535	1.48245	0.833809	-1.47156	-0.682794	0.00680159	-0.153614
TMEM204	0.82056	-1.31355	-0.188802	1.74467	0.0416917	0.404735	-1.11478	-1.18008	-0.0612834	0.846831
MYBPHL	2.61207	-0.569798	-0.236412	0.143332	-0.369344	0.0293553	-0.581512	-0.529886	-0.918181	0.420375
RAB22A	1.5484	0.287822	-1.89941	0.401199	-0.56756	-0.378385	-0.483675	1.12551	0.609288	-0.643185
GLUD1	-0.103732	0.536248	-1.07706	0.220256	1.63116	-0.917918	0.659372	-1.66596	0.869784	-0.152146
MPHOSPH10	1.04972	-0.287329	-1.56641	-0.711838	-0.344177	0.669628	1.35685	-0.163021	-1.10187	1.09844
PTPN20	-0.973206	-0.432231	-0.438535	-0.581677	-0.342579	-0.682298	1.65249	-0.795241	1.18085	1.41244
ANKRD36B	0.729255	0.844553	0.0654913	-0.871353	1.27734	0.406694	-1.99184	-0.6045	0.72453	-0.580173
MAPK6	-0.488629	-0.660476	-1.35437	0.37542	0.515003	-1.6051	1.24976	1.29781	0.471482	0.199103
TATDN2	-0.759826	0.157118	1.04129	-0.918486	-0.290405	0.0189229	-0.334117	1.34029	1.3634	-1.61818
RNF38	-0.741648	0.664484	0.0607692	1.39687	-0.0768089	-1.30552	-0.55095	1.80379	-0.667366	-0.583619
KATNBL1	1.37059	-0.253947	0.736432	-1.52327	-1.05549	0.993742	-0.893285	-0.341803	1.07949	-0.112444
ZBTB17	0.522521	-0.423444	0.454916	0.584163	-0.936996	-1.87299	0.78291	1.02319	-1.05318	0.918902
RAB33B	-0.0906896	-0.717525	-0.178186	-1.36729	-1.21211	1.20878	-0.168949	0.0902525	1.78455	0.651171
CEBPG	-0.475626	-0.33347	-1.3469	-0.128621	0.546771	-1.08581	1.85352	1.3155	-0.425891	0.0805261
USF3	-0.396171	-0.353003	-0.50713	0.676863	-0.793654	0.0489795	-0.350349	2.60661	-0.368002	-0.564141
YIPF3	-1.42156	1.09434	0.599306	1.80118	-0.0122219	0.507407	-0.740699	-0.546297	-0.285471	-0.995988
MAP1LC3C	-0.142541	0.0175912	0.86994	-0.891132	-0.377419	2.37908	0.0958568	-0.891132	-0.891132	-0.169109
C19ORF25	0.116902	0.179675	1.84059	0.00876083	-2.15929	0.562006	-0.443543	-0.207789	-0.362563	0.465258
SNORD114-31	-0.573772	-0.573772	-0.573772	-0.573772	0.401793	-0.573772	1.83337	-0.573772	-0.573772	1.78124
SDHAP1	0.880927	-1.32863	0.29056	-0.320553	0.0911296	-0.401683	-0.185064	-1.24223	0.0903935	2.12516
ZNF594	1.18187	-0.816008	-0.238078	-1.46701	0.362053	-0.0602547	-0.345343	-0.540296	-0.118632	2.0417
HNRNPUL2	-1.0291	0.106296	0.65837	-0.208052	-1.23868	-1.17265	2.0295	0.541317	0.35971	-0.0467098
DGUOK-AS1	0.423867	0.747129	0.394881	-1.12314	1.34543	-1.12314	0.792517	-1.12314	-1.12314	0.788754
DTX2	1.31278	0.485233	1.49621	0.195665	-1.21581	0.434909	-0.976357	-0.350686	0.0390233	-1.42096
STARD7-AS1	-0.595105	-0.617037	0.256034	-0.720921	0.513709	1.47307	0.431316	-2.00336	0.277704	0.984588
MESD	-0.762032	0.796862	0.963716	0.202063	1.32201	-1.53339	-1.11482	-0.930013	0.687219	0.368385
GLCE	1.28981	0.999276	0.848054	-1.56783	-0.643811	-0.0501941	-0.568166	-0.798443	1.15738	-0.666082
CCND2-AS1	-0.551064	-0.551064	0.156438	-0.551064	-0.551064	-0.551064	1.82716	-0.551064	-0.551064	1.87385
MSI1	-0.926014	-0.47764	-0.486683	0.175363	-0.979476	0.0490913	1.62644	-1.01895	0.338886	1.69899
TUBD1	-1.12943	0.430255	-1.3025	-0.565296	-0.889978	0.607593	1.15325	1.21802	-0.607744	1.08584
MTO1	-1.6821	-0.286679	-0.0305136	-0.569281	-0.0362175	0.44846	0.108526	1.31921	1.69535	-0.966759
ALDH5A1	-1.47199	0.0543294	0.228281	-1.60602	-0.768648	1.32671	-0.102937	0.691936	0.828994	0.81934
LOC100288069	0.106095	-0.129262	-1.60292	0.521878	0.98237	1.21903	0.64305	0.517409	-0.654737	-1.60292
RPL10A	-0.962784	-0.985576	-0.257405	0.477846	0.146865	1.15172	1.03578	-1.84219	0.27949	0.956264
DOC2A	0.0762208	0.105237	-1.00823	-0.960846	-0.844834	0.478156	1.10841	-1.19011	0.426549	1.80945
MOB1A	0.0610119	1.64847	-0.685481	0.783884	1.13679	-1.04699	-0.809492	0.0829772	0.268229	-1.4394
TTC19	1.50719	-0.784983	-1.09907	-0.142033	0.33383	0.795417	-0.808397	1.48506	-0.167676	-1.11933
ATG16L1	-0.833542	0.819955	-0.466234	0.225978	0.376303	0.917595	0.561049	-2.3611	0.0618277	0.698174
DHFR2	-0.0200915	0.519812	0.394088	0.904842	-0.61528	-2.0379	-1.00033	0.958245	1.1202	-0.22359
TAS2R9	-0.00506556	-0.921051	1.88006	0.0132973	-0.0340236	-0.921051	0.469809	-0.921051	-0.921051	1.36013
MIR758	-0.495119	-0.495119	-0.495119	-0.495119	0.366816	-0.495119	0.466117	-0.495119	-0.495119	2.6329
PKIB	1.7277	0.436292	0.253732	-1.46237	1.50386	-0.629805	-0.464967	-0.745463	-0.314837	-0.304144
RNF44	0.688587	0.555635	0.95056	0.215196	-1.42131	-0.801584	1.09036	-1.79141	0.0640475	0.449923
LDOC1	1.61409	-0.597473	-0.153525	-0.283206	-0.432359	-0.883627	1.17319	-0.658263	-1.14083	1.36201
LOC102723665	0.685793	0.994485	-0.757292	-0.757292	-0.757292	-0.757292	1.43393	-0.757292	-0.757292	1.42954
C9ORF66	-0.750493	1.33107	2.09148	0.141208	0.0960465	-0.750493	-0.750493	-0.750493	-0.750493	0.0926577
MIS12	1.31519	-0.347786	-0.69051	-0.736836	0.6567	1.37546	-0.00535349	-1.59685	-0.777481	0.807472
PRPS2	0.0944264	1.94477	1.08217	-0.605465	-0.669246	-1.02666	-0.414862	0.53438	0.327229	-1.26673
KIAA1671	-0.0979944	-0.0903501	-0.452066	-1.34416	0.885688	-0.659055	-1.26058	1.85158	0.419091	0.747848
PLOD3	2.46376	0.234732	-0.0411047	-0.1678	-0.918222	-0.0480436	-0.541611	-1.28172	0.0541644	0.245849
ZNF728	-0.465878	-0.414155	0.75123	2.08983	-0.699626	-0.43004	-0.712306	-0.175268	-1.08221	1.13842
MIR650	-0.948875	0.253916	1.83534	1.1827	0.785938	-0.617823	-0.948875	0.0851833	-0.948875	-0.678627
PAX3	-0.0416892	0.295214	0.361788	0.537011	0.214766	1.25158	-1.77595	0.7221	0.212447	-1.77727
ASPHD1	0.620331	0.0551412	0.326659	1.16864	-0.928625	-2.20842	-0.0266742	-0.431738	1.02721	0.39747
TBC1D17	1.16948	0.616675	0.790403	0.674872	-1.12767	0.85996	-1.0543	-1.36297	0.434764	-1.0012
EEF2	0.315011	-0.322225	0.404653	-0.398055	-0.711627	-0.334192	1.49693	-1.80349	-0.174377	1.52737
ETFBKMT	-0.532207	1.23403	0.740148	0.0903543	-0.91851	-1.74397	0.325211	0.528595	1.21741	-0.941064
COG1	1.03805	0.230977	0.322929	-0.601977	0.549104	-0.434724	-2.19003	1.4206	-0.311578	-0.023352
MAGEH1	1.65907	-0.100903	1.38317	-1.28626	-0.799125	0.0179788	-0.457149	0.945447	-0.675191	-0.687039
MIR589	-0.148032	-0.416507	0.231774	-0.686579	0.108134	-2.12481	1.14797	0.501103	-0.0882731	1.47521
USE1	0.794262	-0.331733	0.966041	0.544372	-0.0806345	-0.128055	-2.05511	1.04787	0.457726	-1.21475
SEMA3B	-1.0089	0.046522	0.864878	-0.728177	-0.116234	-0.23377	0.10896	-1.38718	2.14526	0.308646
PIGT	1.29192	0.779131	-0.0243204	0.512591	-0.876406	-0.0544404	-1.91382	0.936241	0.359535	-1.01043
SLC25A1	-1.40341	-0.268872	0.999335	0.266376	0.189559	-0.811252	-1.24147	1.0147	1.58565	-0.330631
ALX1	0.846127	0.413258	0.195246	0.0463182	-0.538206	0.887145	0.642272	-2.45541	0.50799	-0.544744
MSTO2P	1.02772	-0.304308	-0.913677	-1.09834	-0.712287	1.67274	1.02983	-1.14762	0.105467	0.340468
SPIN4	1.3888	-1.69367	-0.426266	-0.827528	-0.591753	0.0321742	0.766723	0.987163	-0.641308	1.00567
RPP30	-0.623568	-0.208781	-0.971565	0.314569	1.05838	-1.67728	1.72894	0.663516	0.104226	-0.388435
MCTP2	-1.12512	0.666006	0.757743	-0.259964	0.974604	-1.5252	0.830481	-0.686508	-0.851404	1.21936
UHRF1BP1L	0.695982	0.187583	-0.779348	-1.33761	-0.483484	-0.49348	1.71092	1.476	-0.597602	-0.378952
ELAC2	0.878283	-1.9666	0.94675	-0.0963141	0.835889	-0.160225	0.62675	-1.49771	0.191056	0.242131
RNF126	0.533463	0.0946215	1.13989	0.943496	-0.244855	-2.09624	-0.0653131	-0.245549	0.96935	-1.02886
MTERF3	-0.303758	-0.348978	-1.10081	0.82432	-1.23309	0.27384	1.85009	-0.0409969	-0.927654	1.00703
IRAIN	0.308686	1.58359	-0.877091	-0.877091	-0.877091	1.09585	1.13072	-0.877091	-0.877091	0.266602
AIFM3	0.491562	1.13006	0.0724654	-0.196529	-0.276812	-1.95178	-0.950112	1.01303	1.17051	-0.502388
AKR7L	1.00046	-1.43918	-0.694436	-0.250419	0.731183	1.56018	-0.161384	-0.905778	-0.802051	0.961435
ATIC	-0.211521	-0.648442	-1.36628	0.677161	0.31594	1.51748	1.15611	-1.56566	-0.0124283	0.137647
TM9SF4	1.21405	0.795755	-0.406711	0.752849	-0.270209	-2.08215	-0.996718	-0.191897	0.69221	0.492822
CSAG4	-0.749642	-0.749642	-0.749642	1.17131	0.495897	-0.749642	1.37027	1.46038	-0.749642	-0.749642
MAP6D1	-0.391115	-0.928961	-0.773744	-0.513882	0.2164	1.42673	-0.934414	0.615127	1.85916	-0.575291
GSR	-0.608134	-0.0425017	0.538114	1.95274	0.350221	-1.74696	0.617811	0.264028	-0.559103	-0.76622
C5ORF56	0.244991	1.25579	1.59481	0.353592	0.606186	-1.56023	-0.762872	-0.22794	-1.00448	-0.499839
SNORA41	-0.348015	0.893929	-0.886081	-1.01467	1.46972	0.791049	-0.483856	-1.0204	-0.707052	1.30537
MRPS25	-0.59508	-0.204797	0.788858	-0.101557	0.951521	-0.462759	-1.18875	-0.0911645	2.03648	-1.13275
TAF1D	-0.0468266	-0.0916365	-1.46856	-0.706252	-0.615757	0.151153	2.19221	0.360854	-0.584255	0.809074
NNT-AS1	0.410336	-0.772272	-0.795634	0.107976	-0.220722	-0.0974529	-0.153072	2.54409	-0.00518763	-1.01806
PLEKHG2	-2.18704	0.585823	-0.288242	-0.654018	0.364937	-0.6251	1.14221	0.184389	0.286039	1.19099
TMEM215	-1.74362	-0.0672342	0.260967	-1.02549	0.0746433	0.970981	-0.160387	1.91521	0.177364	-0.402439
ANKDD1B	-1.31863	1.68926	0.624875	-0.178868	0.474028	1.02327	-1.52302	0.0488289	-0.559143	-0.280598
HOXC4	-0.0815234	1.35698	0.273159	0.540572	-0.949155	-1.98854	-0.707228	0.124138	1.15716	0.274439
KLF12	-0.13454	-1.44327	-0.710134	1.23561	-1.02293	-0.189807	-0.201044	1.64671	1.00032	-0.180914
ABCG1	1.04727	1.64709	1.14454	-0.0848038	-0.00669469	-0.802582	-1.48036	-0.0570939	-0.555531	-0.851834
BAZ2A	0.75759	0.53928	-1.04121	-0.245564	0.595187	-0.783265	0.672895	-0.885502	-1.33929	1.72988
NRXN1	-0.520737	-0.562044	-0.565273	-0.392029	-0.288038	0.157694	2.36352	-0.515428	-0.820679	1.14302
MPPED2	0.687632	-1.32193	0.520377	-1.71206	0.0701436	-1.12401	0.949503	0.654324	0.350238	0.925776
PDZRN3	-0.48905	-1.41668	-0.21892	0.678936	0.846587	0.444375	0.418818	1.25923	-1.85926	0.335967
TK1	-0.792919	-1.75741	-1.15145	-0.613951	0.661238	0.792857	1.05381	0.167351	0.697653	0.942827
KIAA0513	0.012003	1.7624	0.67892	1.29106	-0.0618877	-0.571406	-1.56102	-0.155085	-0.72798	-0.667008
SCAMP1	0.662822	-0.0710197	-0.309029	0.756584	-0.871983	0.679718	-0.00739282	0.818054	0.691319	-2.34907
ST3GAL4	1.14018	0.0333842	0.145359	0.197073	-0.161987	-0.541523	-1.0368	1.38694	0.768682	-1.93132
FAM50A	2.1659	-0.185963	0.518541	0.238627	0.610504	-1.22038	-1.31575	-0.117709	-0.122494	-0.571275
YTHDF2	-0.691235	-0.663275	-0.890659	0.505101	-0.197237	-0.601009	2.21685	-0.661135	-0.140946	1.12354
RPS6KL1	-0.315274	0.00203633	0.536262	0.436301	1.01467	0.458872	-1.08338	-1.81817	1.48153	-0.712847
FRG2C	0.199737	-0.968961	0.43202	0.223166	-0.968961	-0.968961	0.571922	-0.968961	0.318345	2.13065
ZNF440	-0.765515	0.380081	-0.324248	0.806484	0.764865	1.16639	-2.22095	0.249911	0.506195	-0.563214
LHFPL3-AS1	1.87734	1.26522	0.509346	-0.581411	0.525624	-0.267652	-1.05656	-0.629754	-0.636435	-1.00571
FAT2	1.02659	-0.512795	0.422187	0.212207	0.837211	1.42474	-1.44448	-0.798445	0.22998	-1.39719
TBX5	-0.475995	0.765542	0.339734	-0.214668	-0.580053	-1.17779	1.62845	-1.17779	-0.519322	1.4119
ARL4C	-0.172199	2.08604	1.32365	-0.372978	0.338868	-0.731153	-0.583249	-0.186879	-0.494278	-1.20782
GAS2L1	0.0549792	0.511936	0.966728	0.171638	0.195221	-1.58708	-1.12577	0.841147	1.25813	-1.28692
YOD1	0.259173	0.486709	0.0804454	-2.42568	-0.03332	0.573764	0.538447	0.41134	-0.947973	1.0571
C5ORF30	-0.62477	-1.12325	0.421537	0.886694	-0.414497	0.0168199	-0.913879	0.564133	2.06904	-0.881826
SDC4	1.55202	1.06659	-0.234084	-0.750321	0.293141	-1.84514	-0.896242	0.171182	-0.0698563	0.712707
LCLAT1	0.204443	-0.548964	-2.16233	-0.0207256	0.443843	-0.657513	1.34307	0.0625274	0.0969929	1.23866
ITPA	-0.905147	0.380198	0.0543388	1.19118	-0.30648	-0.128443	-0.493324	-1.96398	1.23622	0.93543
PURB	-2.2195	-0.0448534	0.685561	-0.409749	-0.0644615	-0.0274782	1.16704	1.36908	-0.0170811	-0.438556
NDUFB8	0.0877625	0.386297	0.701668	-2.38324	0.840011	-1.02689	0.629586	-0.190975	0.375044	0.580742
INPP1	1.03169	0.173441	-0.968327	-0.434118	0.443772	1.94366	-1.39253	0.195685	-0.0880298	-0.90525
CLN8	-1.41257	-1.1139	0.398627	-1.03761	1.02475	1.31916	0.222597	0.708776	0.713218	-0.823062
ABAT	0.0650616	0.106969	-0.175612	-1.14189	-0.0692325	1.87047	0.492428	-1.51383	-0.696134	1.06177
MIA3	0.782566	-0.0545692	-0.869663	-1.26897	-1.29777	0.0251045	1.62285	0.48636	-0.51863	1.09272
FAM212A	-0.245148	-0.64084	-0.0563184	-0.90989	1.12754	-1.65631	0.294168	-0.222065	1.81857	0.490284
PYCR1	-0.72068	-0.837031	-1.11708	0.785849	-0.761019	0.530117	1.61009	-0.476345	-0.442071	1.42818
EXD1	0.195955	-1.04279	-1.04279	-1.04279	-0.192716	-1.04279	0.838158	1.44422	0.876262	1.0093
CACNA1C	-1.19644	-0.972617	0.107366	-0.289351	0.406846	0.495236	1.40512	-0.999177	-0.618638	1.66165
HTR1F	0.338621	-1.5302	-0.41373	1.04123	1.00836	1.46477	-1.11338	-0.010299	-0.930279	0.144917
TMEM145	0.777674	1.1733	-0.409673	-1.74213	-0.867158	-0.796605	0.123568	1.54372	0.174105	0.023203
SYNJ2BP	-0.600324	0.272176	-0.311659	0.428043	-0.466371	1.24482	0.511987	0.992359	0.214807	-2.28584
APOA1	-0.678874	-0.678874	-0.678874	-0.678874	0.43271	-0.678874	1.4448	-0.678874	0.217678	1.97806
POLE4	0.357789	1.55084	-1.13217	-0.283602	1.22735	-1.78508	0.394132	-0.294896	-0.307779	0.273415
MRPS2	-0.502072	-0.940084	-0.317771	0.68871	-0.928869	2.08141	0.567992	-1.14558	0.657825	-0.161562
LOC105369980	2.76383	-0.391458	-0.391458	-0.391458	-0.391458	-0.391458	0.367831	-0.391458	-0.391458	-0.391458
DPM2	-0.753709	-1.59691	0.689087	0.931729	-0.316106	1.09259	-1.46422	0.949283	0.446797	0.0214607
CLGN	0.10803	-0.51293	-0.0752993	-0.945779	0.380714	-0.945779	1.8238	-0.945779	-0.429761	1.54278
NRXN2	0.1118	-0.96438	0.199356	-1.23141	-0.810793	0.941488	1.47458	-0.0104563	-1.02579	1.31561
PLEKHJ1	1.28339	0.595706	0.326976	0.146364	0.432949	-2.14216	-0.640457	-0.641341	1.05006	-0.411483
GMEB2	0.346759	-0.468019	0.23227	-0.766051	-2.18434	1.29683	0.86166	-0.432854	0.465315	0.648429
TIMM50	-0.441996	0.352108	-0.809074	0.513055	0.0521034	-0.223225	-0.747638	0.697174	2.10385	-1.49636
GAREM1	0.0537797	0.442079	0.870053	-1.4988	-0.896634	-0.718909	1.13753	-1.18414	1.1893	0.605736
FAM102A	-0.339474	1.68602	0.390188	0.272675	-0.793364	-1.16227	-1.54093	1.12588	0.43352	-0.0722445
C9ORF16	-1.73238	-0.496707	-0.569293	0.416976	0.0931476	-0.256256	0.470626	-0.495773	2.12477	0.444885
LOC283387	-0.60341	0.947627	-0.60341	-0.60341	-0.60341	-0.60341	1.94341	-0.60341	-0.60341	1.33283
LOC100289561	0.847485	0.00507567	0.376218	0.00767388	-1.75565	2.05015	-0.0409951	-0.237767	-0.546957	-0.705238
SNORA73A	0.112907	0.6068	-0.730601	0.348161	0.312956	-0.409543	0.684246	-2.38864	0.255759	1.20796
SUMO3	-0.296345	0.359167	0.173083	-0.448135	-0.573785	-1.70878	1.00378	-1.00325	1.54588	0.948382
TIMP1	1.39674	1.19143	1.48564	-0.171694	-0.561619	-0.31811	-1.46263	-0.473011	-0.436472	-0.650279
SEZ6	-0.437073	-0.437073	-0.437073	-0.437073	-0.437073	2.73345	-0.437073	0.425565	-0.437073	-0.0995051
TVP23C	1.25508	-0.0534152	0.295092	-0.867608	-0.19376	-2.24615	0.552095	1.06446	-0.0489149	0.243126
KIAA1958	-1.12431	-1.10836	-0.852489	0.376686	0.219524	-1.16264	1.2798	0.83847	0.165654	1.36767
SLC38A3	0.327585	-0.377445	-1.38451	-0.0621118	0.512694	-1.38451	1.34263	0.263439	-0.734048	1.49628
PLCE1-AS1	-0.0804278	2.49342	-0.732764	-0.260097	-0.184366	-0.732764	-0.732764	0.302748	0.659778	-0.732764
RSPH3	0.408721	0.302907	1.40376	0.205584	0.507659	0.907308	0.118521	-0.777432	-1.92255	-1.15448
SHISA4	0.648168	0.137315	0.347067	-0.566651	-0.970463	-1.50998	-0.968098	1.6328	1.13154	0.118299
KLHL4	-0.474147	0.209585	0.945978	-0.23357	-0.0410206	-1.46301	0.933349	-1.46301	-0.034968	1.62081
E2F3	-1.97573	-0.844442	-1.0153	0.473629	0.257936	0.988433	0.737351	0.887175	-0.317302	0.808251
FBXL22	-1.08699	0.654702	1.32965	0.37655	-1.08699	-1.08699	1.09162	-1.08699	0.0336509	0.861787
SLC6A14	-0.767217	-0.10074	0.796078	-0.767217	0.605343	2.33475	-0.174598	-0.767217	-0.767217	-0.391964
TUBE1	0.0227333	0.257906	-0.0520244	-0.67199	-1.11988	-0.0801305	1.41496	1.35997	-1.73332	0.60178
CPA4	-0.267325	-0.301495	-0.508454	2.1606	0.410097	1.11962	-1.22017	-0.196745	-0.948988	-0.24715
USP38	0.956232	0.121107	0.747509	-0.172597	1.24815	-0.438723	-1.8044	0.704612	0.0444185	-1.40631
LOC100287497	-0.366952	-0.808477	-1.62849	0.814547	-0.0121661	-0.650407	1.17441	0.744001	-0.698895	1.43243
ALDH8A1	1.5211	-0.187202	0.238357	-1.01975	0.213273	-1.82463	0.362005	1.35381	-0.335527	-0.321439
MLYCD	1.32099	-0.133073	0.788995	-0.246707	-0.314026	0.578256	-1.71823	0.116382	-1.43686	1.04427
LOC150051	-0.920198	0.0351563	-0.920198	-0.920198	0.490643	-0.920198	1.10858	-0.119135	0.13857	2.02698
TRIM39	-1.9114	0.095249	0.711313	1.86148	0.074744	0.355568	-0.542606	0.34559	-0.901496	-0.0884393
SLC38A7	0.479599	0.30039	0.647107	1.64302	-1.44625	0.779732	-1.51266	-0.159508	-0.740396	0.00897726
VPS26B	1.14781	-0.501992	0.0460388	0.142107	-0.851975	-2.11286	-0.0206078	0.867455	1.2081	0.0759219
UBL5	1.55796	0.217177	0.670207	0.137709	0.385958	-1.17461	-0.987878	0.139958	0.768813	-1.71529
RPS9	-0.306962	-0.0632007	0.64814	-1.11991	-0.587639	0.296544	1.82655	-1.62853	0.0381385	0.896867
WFDC3	1.69905	-0.255495	-0.268856	1.27802	0.0155534	-1.32554	-0.650939	-1.32554	0.585273	0.248474
CHD2	-0.237036	0.176275	0.104159	-0.523145	-0.118946	1.8225	-0.0794018	0.0614407	-2.11214	0.906289
NDUFAF4P1	-0.134496	1.7135	-1.1168	-1.1168	0.222727	1.16662	-0.365043	-0.11695	-1.1168	0.864042
HK1	0.560556	0.309326	0.70985	0.877532	1.1722	-0.778493	-0.742586	-2.09171	0.444	-0.460677
ADAT2	-0.627957	-0.391753	0.101286	1.49864	-0.659894	1.69915	-1.15884	0.0635985	0.571283	-1.09551
BCLAF3	0.709034	-0.284419	-0.426244	-0.863165	-0.282342	-0.711864	-0.350915	2.47951	-0.680555	0.410957
TAF5L	0.337324	-0.113687	0.217577	0.160567	-0.665169	-2.3786	0.538322	1.4424	0.564746	-0.10348
ANGPTL6	0.903759	0.181204	-0.345299	0.349624	-0.159109	-1.26746	-1.26746	2.12881	-0.234233	-0.289831
MPPED1	-0.472727	-0.472727	-0.472727	-0.472727	-0.472727	-0.472727	1.71601	-0.472727	-0.472727	2.0658
GJA4	-1.20724	-0.115929	0.343075	1.86079	-0.139875	0.726499	-1.82096	0.269904	0.109936	-0.0262017
PLXNB2	-0.421506	0.601093	1.18269	1.11413	-0.481505	-0.179953	-0.462182	-2.22687	0.404026	0.470081
KIAA0355	0.395208	0.101304	0.937457	0.423117	-0.663869	0.931253	-1.64838	-0.0409087	1.13412	-1.56929
LINC01569	1.23104	0.225552	0.848371	-1.38163	0.632661	-1.38163	0.628725	-1.38163	0.399523	0.179015
BORCS6	0.458285	0.500314	1.9815	0.293198	0.494689	-1.33909	-1.23865	-0.616321	0.198249	-0.732162
HOXB-AS3	1.67295	1.22039	-0.859736	-0.859736	-0.859736	-0.859736	0.756456	0.666045	-0.859736	-0.0171679
C9ORF64	-0.882252	-0.1257	-0.00341842	-0.226724	1.50783	1.72141	-1.04729	-0.795447	0.692943	-0.841356
AK8	0.583909	-0.732023	-0.591556	-0.387396	0.722324	-2.1656	0.00980416	0.478697	1.12846	0.953378
RNA5S9	-0.631085	0.29655	0.0786184	-0.648776	1.75984	-1.3556	-0.364633	-0.819227	0.160433	1.52387
PRKDC	-0.709579	-0.446347	-1.25916	0.613938	-0.366224	-0.00121645	2.1603	-0.131145	-0.798306	0.937736
SFR1	-0.373911	0.116001	-0.201015	0.136739	0.830891	-2.45356	1.15793	0.544902	-0.331927	0.573946
TRIT1	0.709172	-0.509962	-1.13026	0.49355	-0.516691	1.16693	1.46067	-0.250332	-1.68067	0.257599
KRT222	0.311464	0.101174	1.33619	-1.21553	1.49612	-1.21553	0.431479	0.33849	-0.368335	-1.21553
CCT4	0.655086	-0.20919	-1.25376	0.355745	-0.934857	0.918808	1.8965	-1.21696	-0.0335135	-0.177852
PINLYP	-1.13793	0.0207068	0.411777	-0.0982836	0.557951	2.36062	-1.07133	-0.511622	-0.0530233	-0.478873
ELMO3	0.178889	-1.24595	0.298415	-0.739811	-0.537216	1.64059	-0.538106	-1.11421	0.753376	1.30402
SMC3	-1.24666	-0.551398	-1.30368	-0.647482	0.451296	0.130667	1.92834	0.394873	-0.112593	0.956639
SPATA45	0.702128	1.07352	-1.0549	0.218202	0.843932	-1.0549	-1.0549	-1.0549	-0.0800784	1.46188
MRPS36	0.513067	0.208951	0.203431	0.372085	0.223188	0.540004	-1.05073	1.01798	0.395827	-2.42381
RAI14	-0.27694	0.0794569	0.611832	-0.797221	-0.729082	-0.727495	-0.152297	2.53595	0.0771453	-0.621352
PCNX1	-0.353068	1.60943	0.0773541	-0.145421	0.308138	0.965595	-0.607799	-1.03791	0.905381	-1.7217
HABP2	1.37038	-0.703674	1.81676	-0.703674	0.120604	-0.703674	0.914294	-0.703674	-0.703674	-0.703674
FRG1-DT	-0.731537	-0.731537	-0.731537	-0.731537	0.34472	-0.731537	1.64988	-0.731537	0.995972	1.39865
ZFP57	-0.724148	2.39222	-0.724148	-0.156645	-0.724148	-0.724148	-0.0548632	0.97777	-0.415423	0.153535
LIMS2	-1.13436	-0.232082	-0.867327	1.36799	-0.00445185	1.43065	-1.01243	-0.693157	1.21592	-0.0707519
LINC01597	-0.656049	-0.656049	-0.110657	-0.656049	-0.343834	-0.656049	2.13881	0.138594	-0.656049	1.45733
GANC	0.177239	0.612458	1.11862	0.600454	-0.0590456	0.979472	-1.24533	-0.895944	0.5468	-1.83473
RHOF	-1.28342	1.66306	0.927561	0.0796029	0.636158	0.162949	0.306177	-1.69488	-0.448527	-0.34868
UBE2H	1.61551	0.95889	0.471981	0.89898	-1.09882	-1.43354	-0.0474633	0.136681	-0.86948	-0.632741
HRASLS2	1.18953	0.922787	-0.74741	-0.74741	1.71909	-0.74741	-0.74741	0.653047	-0.74741	-0.74741
BMS1P2	-0.0792337	-0.165472	1.13682	-1.11426	-1.3827	-0.610485	1.60633	-0.338009	1.18235	-0.235343
SNORD101	-1.0157	-0.600403	-1.14714	0.661123	-0.414819	2.04741	0.941449	-0.415959	-0.491649	0.435681
USP32	-0.0149851	1.4882	-0.599666	0.433825	0.133166	-1.12191	-1.56848	1.23285	0.708722	-0.69173
VN1R1	1.95596	-0.377562	0.302872	0.538186	-1.90036	0.0326443	-0.651087	0.669581	-0.323951	-0.24628
ZFP64	0.344303	-0.329679	-0.845134	0.631289	-1.49853	-0.804852	0.597868	-0.727931	0.86148	1.77119
ERGIC3	2.03711	0.551978	-0.759233	0.803646	-0.481621	-1.33098	-1.07474	-0.0800817	0.393348	-0.059427
FAM71A	0.542123	-0.657748	-0.657748	-0.657748	0.165651	-0.657748	-0.657748	2.26675	-0.657748	0.97197
MT2A	1.0493	1.08205	0.537416	0.784324	-0.0360047	-0.714497	-1.74478	0.583102	-0.161807	-1.3791
SULF1	-2.3016	0.180299	1.6066	-0.259151	0.41159	0.268441	-0.285598	0.475478	-0.531819	0.43576
CNPY4	0.556721	0.759891	-0.0726676	-0.251423	0.0850916	-2.47183	0.291442	-0.595317	1.00042	0.697678
PPARGC1B	1.42748	0.12202	0.743495	0.4942	-0.0726707	1.13189	-1.54867	-0.182746	-0.744791	-1.3702
HADHA	0.756213	-0.233181	-0.758924	0.65725	1.03158	-1.05491	1.61188	-1.38551	0.175722	-0.800116
ANKRD44	-0.906079	0.947755	0.601829	0.4442	0.674545	0.759588	-1.38887	0.960482	-0.47816	-1.61529
LOC100133050	0.118898	0.99164	0.965627	-1.11842	-1.11842	-1.11842	0.760358	-1.11842	0.546157	1.09098
PAIP2	0.873937	0.409789	-0.0839487	0.640507	-0.265331	-1.25231	0.180183	1.78136	-1.45663	-0.827551
ME2	-0.76763	1.21336	-0.625115	-0.643207	1.60002	-1.06466	0.766402	0.344769	0.423129	-1.24707
RAD51-AS1	-0.779092	2.0955	-0.13707	-0.714174	0.114454	-0.184644	0.580133	-1.68433	0.333889	0.375337
PLD1	0.138245	-0.0265569	0.297968	0.557836	0.95666	-0.0650222	-2.02038	0.275751	1.26492	-1.37943
RFX8	0.0170853	-0.438869	1.36558	-0.748894	1.58096	-1.60899	-0.961092	0.59051	0.0987619	0.104948
KU-MEL-3	0.389163	0.465253	-1.08579	0.739695	-1.08579	1.01766	-1.08579	0.219672	1.51172	-1.08579
RPARP-AS1	-1.33952	1.07191	0.470664	-0.192064	0.0433405	-0.982064	1.01913	-1.57033	0.397589	1.08135
TCAP	0.618803	-1.55346	1.03617	-0.430601	-1.55346	0.278078	0.922066	-0.433006	-0.0725516	1.18796
LOC644794	-0.226941	0.0388127	1.24405	-0.287851	-0.790179	1.60989	1.05133	-0.298578	-0.881415	-1.45912
LOC101927021	0.521622	-0.298002	-0.776669	-0.695896	0.515022	1.88288	-0.97985	1.27943	-0.942178	-0.506356
CD1E	0.797952	-0.231824	-0.0133519	-0.795589	0.325393	2.3803	-0.795589	-0.795589	-0.0761137	-0.795589
TXLNG	1.03526	0.195108	0.102015	-0.462479	-1.34757	-0.882286	0.0186948	2.10173	-0.807269	0.0467958
ZNF519	-1.30347	-1.04656	-0.381326	-0.526352	0.56371	-0.168326	1.61203	0.0506588	-0.428862	1.62849
PCSK2	-1.16468	-0.14539	-1.16468	0.728462	-0.772139	-0.857992	0.648181	1.00447	-0.00069858	1.72447
RPSA	-1.3155	-0.180359	-0.266458	-0.791647	1.68718	-0.257246	1.2966	-0.996177	0.965766	-0.142164
KRT8	-0.75162	-0.203935	1.54559	-1.2146	0.739	0.634215	-0.751509	-1.06722	-0.272657	1.34274
ATXN2L	-0.697025	0.213154	-0.218931	0.983978	-0.997762	-0.34783	1.35587	-1.67365	0.0822708	1.29992
PAFAH2	1.36339	1.00953	-0.182498	1.60907	-1.1475	-0.9138	-0.727943	-0.528117	0.218683	-0.700824
C12ORF73	0.49107	-1.0756	-1.33558	0.0387564	0.0684492	-0.363794	1.71781	1.40004	-0.0669963	-0.874155
SLF2	-2.16545	0.40659	-0.369336	0.315581	1.07319	-0.95859	0.150286	-0.306614	0.965754	0.888594
HP09053	0.200099	-0.232811	-0.924775	-0.924775	-0.372767	2.37755	0.286837	0.665955	-0.924775	-0.150537
CEP250	0.0306864	-0.476789	-0.863196	-0.103631	0.294666	-1.96633	-0.0698906	0.557176	0.866058	1.73125
KIAA1456	-0.0657624	-1.91878	0.490877	0.024111	-0.418216	1.65092	0.150599	-1.09089	0.953543	0.223593
TSGA10IP	-1.06356	1.34261	0.627828	-1.06356	0.30279	-1.06356	-1.06356	0.957914	1.12227	-0.0991978
SLC16A5	0.532161	0.620589	-0.276157	0.819317	0.297287	0.490641	-1.93385	-0.636843	1.2896	-1.20275
C15ORF62	-1.15783	0.112138	-1.15783	-0.090678	0.433829	-1.15783	0.613609	2.07961	0.249607	0.0753656
BROX	-0.200554	1.12503	-0.915756	0.991157	-1.02308	-0.431006	-0.0694686	1.63917	0.256732	-1.37223
DOK3	-1.12599	1.26319	2.04472	-0.436512	0.440103	-1.10817	-0.169801	-0.163884	-0.446389	-0.29727
POLR2L	1.32773	0.436258	-0.395677	0.291335	0.617781	-0.0592767	-1.72171	-1.15136	1.30619	-0.651263
PHACTR2	-1.19374	0.467446	0.036389	-1.16226	0.605575	-0.154966	0.884159	1.42334	-1.5474	0.641457
LOC100507516	-0.686054	2.11767	-0.0878652	-1.35517	-0.656357	-0.44902	0.96712	0.695228	-0.25406	-0.291493
SLC36A4	-0.135847	-0.208501	-0.745058	0.518233	0.778651	0.46317	1.03136	-2.43367	0.506262	0.225406
KMT2E	2.20408	0.32204	-0.274944	0.549771	-0.779706	0.129511	-0.185165	0.176341	-0.48939	-1.65254
GK3P	-0.113736	0.200355	0.1781	-1.58206	0.85996	0.860995	0.35387	-1.58206	1.40308	-0.578491
KLHL15	0.846909	-0.296989	-0.101233	-1.09435	-1.15055	-0.833745	1.14833	1.32152	-0.892029	1.05213
SNORD18C	0.162873	0.979512	-0.932785	-0.715965	0.333363	-2.0295	1.33464	0.0149831	0.0685796	0.784301
ZNF625-ZNF20	-0.308347	0.160276	0.938057	-0.264092	0.89621	-2.57597	0.141316	0.630765	0.194739	0.187043
HIST1H2BK	-2.12939	-0.886733	-0.327174	0.390635	0.535469	0.342557	1.26721	-0.520344	0.305003	1.02277
TRIM41	2.16904	-0.898032	0.014038	0.546337	-0.971001	0.0449144	-0.823099	0.590562	0.368135	-1.0409
DLX6	-0.183614	-0.676362	-0.680442	-0.531948	-0.458143	-0.555223	1.81567	0.713683	-1.0032	1.55958
TRA2A	0.375658	0.614693	0.165209	0.307303	0.0490849	-1.87998	1.09487	-1.67281	0.0381864	0.907783
LAT2	-0.229899	1.26511	1.6875	-0.193179	0.853067	-1.46459	-0.993704	0.106163	-0.687365	-0.34311
BCL2L1	0.571713	1.1287	0.625863	0.108053	-0.27049	-1.63295	-1.52387	0.823265	0.872817	-0.703107
ELAVL1	0.255698	-0.249899	0.460723	0.392742	-0.608887	-2.0743	1.70825	-0.266502	0.811567	-0.429393
ZNF576	0.198197	-0.342516	0.744863	-0.560018	-0.333575	2.42175	-1.09254	-0.206801	0.0427426	-0.872106
ACTR8	-2.04267	0.64742	0.151105	-0.23433	0.893319	-0.71501	-0.274991	1.39813	0.78682	-0.609792
CYP4F30P	-0.472414	-0.472414	-0.472414	-0.472414	-0.472414	-0.472414	1.69863	-0.472414	-0.472414	2.08069
CHST7	0.255061	0.546323	2.35223	-0.0863886	0.296162	-0.668198	-0.646218	-0.606346	-1.32793	-0.114696
GLMN	-0.208498	0.279663	-1.54486	0.424873	-1.20828	-0.400762	0.62843	1.99578	-0.378156	0.411805
ATP6V1D	-1.23306	0.168594	-0.441919	1.05855	0.0182097	0.442135	-0.636659	1.36663	0.93085	-1.67332
C8ORF46	0.0832383	0.834931	0.17755	1.3624	0.0437819	0.579266	-1.50531	0.862957	-1.01168	-1.42713
TUT1	1.4405	-0.530733	0.368205	-0.256579	-2.22261	-0.00162365	0.66197	0.397667	-0.597461	0.740665
POLR2E	0.798066	-0.552471	0.732562	1.2703	0.506312	-0.508762	-0.822951	-0.0235251	0.666844	-2.06637
KIF2C	-0.485726	-1.44589	-1.18173	-0.0745396	0.951629	0.418424	1.7962	-0.143454	-0.599444	0.764532
ZC3H7A	-0.367031	0.254209	-0.506433	1.22504	0.428684	1.44643	0.115288	-1.53842	-1.48493	0.427169
LRWD1	1.89715	-0.930796	0.748414	0.312419	-0.489238	-0.76313	0.863665	-1.31847	-0.669655	0.34964
HFE	0.783785	0.674947	0.504631	-1.07214	0.222416	-1.08003	0.150542	-1.79975	1.4174	0.198197
SRSF2	-0.291772	-0.709042	0.182075	-1.29318	-0.289097	1.07593	1.55148	-1.44651	0.277132	0.942982
EGR1	0.355069	-1.00333	-0.568096	-0.0569856	-1.47036	0.540332	0.45364	2.15781	-0.470659	0.0625792
WDR60	1.81593	0.207691	0.0612384	0.0119176	0.141841	0.316353	0.0742855	-2.15927	-0.850125	0.380145
SLC24A1	1.71785	0.739266	-0.624083	-0.0586346	-0.558957	0.993698	-1.54814	-0.221528	0.576282	-1.01575
LINC02012	2.04151	0.191917	0.708185	0.435375	-1.14031	-1.14031	-1.14031	-0.0232403	-0.283128	0.350318
PRMT9	0.066967	-0.860438	-0.379678	-1.576	0.945306	0.485007	-0.802452	1.79283	-0.377198	0.705651
VSIG1	-1.32081	-0.115087	0.128513	-0.0833211	0.0313818	-1.32081	0.880434	0.259176	-0.542034	2.08256
RAE1	0.0979843	-0.556356	-1.63223	-0.732763	-0.945296	1.54092	0.963161	0.723443	-0.283633	0.824763
TRIM2	-0.0296049	0.345542	0.0802184	-2.69007	0.791947	0.901996	0.128182	0.103567	0.408958	-0.0407393
CYP2C9	-0.732793	0.95001	0.928999	-0.732793	0.609647	-0.732793	-0.732793	-0.732793	-0.732793	1.9081
KDSR	-0.730354	1.57664	-0.634325	1.03035	0.267165	-0.941716	-0.840899	0.050927	1.29942	-1.07721
KMT2A	0.442866	-0.0014439	-0.736743	-0.512	-1.0218	-0.93679	1.39647	1.75975	-0.885899	0.495589
GPR1	-0.492206	0.901411	-0.344973	-1.23299	0.739186	2.0031	-0.433397	-1.23299	-0.085378	0.178231
ELOVL4	-1.51511	-0.412702	-0.125798	-1.23607	0.583019	0.374657	1.53012	0.679218	-0.860619	0.983296
SPON1	-0.770863	-0.36615	0.0546456	-1.04953	0.26118	0.776757	1.39375	-1.05128	-0.882339	1.63383
NFE2L3	-0.0808184	1.10351	0.644191	-1.7024	0.57976	-0.11694	1.08514	-1.64829	-0.255481	0.391327
ADCY8	-0.531189	-0.531189	-0.201165	-0.531189	-0.531189	-0.531189	2.00673	-0.531189	-0.37815	1.75972
IGFBP2	2.02664	-0.00279149	-0.382669	0.697765	-0.768031	-0.409104	0.115438	-1.34022	-0.887936	0.950901
PIK3R2	0.265977	-0.685075	0.0458996	0.0649753	-0.751136	0.0923379	-1.7752	0.742417	2.04363	-0.0438296
ING4	0.837329	0.205924	1.25207	0.308261	-1.76551	0.433515	-0.580802	-1.13272	-0.665249	1.10719
OCIAD1	0.631897	-0.00492354	0.0297144	-0.205613	-0.937345	-0.929242	2.42938	-0.907783	-0.257765	0.151678
ACO2	-0.236544	-0.968559	1.13545	-0.0841168	-0.564797	-1.66756	1.07419	1.12267	-0.672731	0.861996
PCDHGA11	2.01565	-1.09444	0.658028	0.0257081	-1.10138	-0.553427	-1.07252	0.0796011	0.313963	0.728817
ACAP3	1.27465	-1.05671	-0.079969	-0.139556	-0.447073	-0.16124	-0.976182	2.19574	-0.457914	-0.151742
MTTP	0.0224825	0.256737	-0.0986684	-0.493822	-0.368027	2.50447	-0.330434	0.415814	-0.663786	-1.24477
ASL	1.17434	-0.497886	0.849269	-0.271282	1.49976	-1.03509	-0.156621	-1.39154	0.715134	-0.886083
PPARGC1A	1.55252	0.669283	0.959634	-0.0319077	0.616305	0.358927	-0.638445	-0.890833	-1.56391	-1.03158
HSPD1	0.697159	-0.657319	-1.24619	-0.332684	0.516158	0.652533	1.64483	-1.44154	-0.597855	0.764912
JAK2	-0.364799	0.525803	1.09278	-0.136371	0.734739	0.0717079	-1.51416	1.5923	-0.983324	-1.01867
TENM1	0.252954	-0.707173	-0.282872	-0.926851	0.416605	0.712349	0.931763	-1.13694	-1.10997	1.85014
SNORD29	-0.457099	-0.190752	-1.29226	-0.297193	0.596921	-0.581013	1.95546	-0.694806	-0.395533	1.35627
SCARNA9	0.310021	0.354629	-0.629879	-0.771169	-0.42124	1.17328	-1.26904	2.06808	-0.325634	-0.489054
TOP1MT	0.376005	-0.118031	-0.512383	1.08899	-1.02577	0.344729	0.871692	-2.18174	0.442898	0.713599
PTPN2	-1.7723	-0.0111292	-0.741453	-0.173519	0.379407	0.3206	0.985184	1.77294	0.181265	-0.941001
STAC3	-0.696579	1.5034	1.12124	-0.0461478	0.505098	-1.15877	0.349448	-0.959069	-1.34953	0.730917
MRPS9	0.898788	-0.86339	-1.07945	-0.84975	0.570563	-1.14214	1.88112	0.0648599	-0.0950447	0.614448
CASTOR1	0.951177	0.700964	0.278378	-0.904375	-0.939535	1.35099	-1.94752	0.0471164	0.453279	0.00952946
RAB1B	1.18169	0.791958	-0.40374	0.809368	0.878722	-0.489681	-1.06519	0.537708	-0.341969	-1.89887
THBD	-1.03593	-0.302886	-0.0847492	0.858192	0.8172	0.570556	-1.66363	-0.0462438	1.65504	-0.767546
IRF2BP1	-0.766519	-0.394192	1.18846	-1.36797	0.123668	0.195601	0.669738	-1.49895	1.43143	0.41874
RTF1	0.192006	0.239127	-0.00710732	-0.293953	0.152547	-2.62425	1.06656	0.111081	0.379291	0.784702
FOXA1	-0.373583	0.453768	1.49657	-0.973101	-0.757013	-0.568237	0.292518	-0.974475	-0.427776	1.83133
PCF11-AS1	-0.0408112	0.157213	0.407824	-0.520448	-1.66336	1.05174	0.13949	1.81944	-0.21675	-1.13433
MIR506	1.36791	-0.907562	0.681572	0.444669	0.661323	-0.907562	-0.907562	-0.907562	1.38233	-0.907562
RHOT1	0.581996	-0.741707	-0.479008	0.0830371	-0.992652	0.863143	0.432161	1.85762	-0.0214128	-1.58318
TTLL1	-1.72961	-0.560724	-1.19845	0.55328	-0.420018	-0.168518	0.955214	1.06061	0.219257	1.28896
ALG2	-1.16162	-0.113282	-0.420302	-0.281132	0.809591	1.26364	-1.23924	1.83165	-0.315871	-0.373439
ASPN	-1.28555	-0.116617	-0.0819452	0.356308	2.17576	-0.985046	0.289195	0.0362028	-1.01132	0.623014
CECR2	-0.874331	0.0874951	0.128402	-0.583997	-0.690071	1.19117	1.25944	-1.28475	-0.722262	1.4889
UBE2R2	-1.22418	0.738887	-1.37788	1.24283	0.00446188	-0.813523	1.21788	0.637359	-0.872573	0.446741
OOEP	-0.410764	0.58218	-0.410764	-0.410764	-0.410764	-0.410764	-0.410764	-0.410764	2.70393	-0.410764
C2CD4C	-1.09282	0.764573	-1.09282	0.467944	-0.04281	-1.09282	1.23051	-1.09282	0.965628	0.985415
DARS2	0.762657	0.107253	-1.11798	0.95672	-0.0937844	-1.82583	0.736735	-0.639141	1.37158	-0.258207
GOLGA1	-0.147071	-1.0567	-0.224943	0.755584	0.947218	0.986362	-2.16371	0.460029	0.656718	-0.213488
MAL	-0.806215	0.314548	-0.787431	1.27095	1.35079	0.956005	-0.738596	-1.29056	0.582803	-0.85229
ZFP82	-1.49159	-1.11374	-0.535703	-0.254914	-0.755735	0.457683	1.1795	1.15755	0.0659486	1.291
C16ORF74	1.20669	-0.733212	-0.753044	-0.563309	-0.651022	1.31376	-0.528721	-0.567006	-0.492809	1.76867
ZHX3	1.59147	-0.571042	-0.00677703	0.847988	-0.696775	0.537384	-1.71141	1.07346	-0.5238	-0.540494
CSMD2	-0.437776	0.160671	1.13923	-1.56343	1.0082	-0.999601	0.602925	-0.267943	-0.944837	1.30257
LMCD1-AS1	1.81309	-1.17113	0.457294	-1.17113	-1.17113	1.08908	0.295143	0.211565	-0.11012	-0.242668
GJA3	0.372136	1.28361	-1.37536	0.0719786	0.350858	-1.38637	0.842848	0.700701	-1.35227	0.491869
EPS15L1	1.02808	0.65993	0.306713	0.941254	-0.805434	0.316216	-0.823811	0.970196	-0.665438	-1.9277
NBPF19	-1.61904	-0.346836	-0.0794797	0.316632	0.855581	0.353803	1.2293	-0.656932	-1.32083	1.2678
MOB1B	-0.148075	0.0340733	-1.59616	0.548442	1.70207	-0.0602863	-0.00336881	0.308306	0.795885	-1.58089
EFCAB12	-0.12549	0.392363	0.810851	-1.21786	-0.46644	-1.21786	0.859128	-1.21786	0.653082	1.53007
LINC00346	0.223243	-0.230901	0.657429	-0.0825258	0.683674	-2.10648	-1.13091	1.25344	0.83258	-0.0995638
FBLN5	-1.41349	1.48811	-0.264236	0.0922483	1.29897	0.833924	-0.757732	-0.646754	-1.06883	0.437786
SNORD116-27	-1.91592	1.74773	0.927947	-0.445876	-0.251242	0.154025	-0.517093	0.425625	0.516868	-0.642062
MTMR8	-1.41632	0.181022	1.18886	-0.691314	-0.126646	-0.248994	0.418707	1.3477	-1.507	0.853985
RGS20	0.960538	0.523932	-0.0707281	0.941882	-0.275695	0.993679	-1.30328	0.55791	-0.413399	-1.91484
ABCG4	-0.537772	-0.725496	-0.269999	0.463977	0.599881	-1.9009	1.2626	-0.513646	0.198061	1.42329
MAGEB1	-0.428425	-0.428425	-0.428425	-0.428425	-0.428425	0.803183	-0.428425	2.62422	-0.428425	-0.428425
SLC16A11	0.926734	1.31205	1.28483	-0.896198	-0.896198	-0.896198	0.0947843	-0.896198	-0.896198	0.862585
TMEM207	-0.316228	-0.316228	-0.316228	-0.316228	-0.316228	-0.316228	-0.316228	2.84605	-0.316228	-0.316228
POLR3GL	0.932107	0.453498	0.218246	0.35604	0.414828	0.121802	-2.07951	0.87517	0.259185	-1.55137
MATN1	0.14494	-0.460769	-1.42894	0.175655	0.000825918	-1.42894	1.8282	0.66177	-0.355969	0.863216
UPP1	-0.525159	0.344426	0.135195	0.47789	1.36063	-1.28036	-1.07604	1.48804	0.268687	-1.19331
CERK	-1.88471	-0.697905	0.0309095	-0.323085	0.0134497	-0.865241	1.35051	0.59113	0.479983	1.30496
EIPR1	0.487939	0.289625	-0.916091	1.71114	-0.77214	0.145492	-1.72928	-0.454368	1.02544	0.212241
CRYL1	-0.561479	-0.479968	1.29207	0.781397	0.508934	0.656999	-1.69773	-0.34653	1.03435	-1.18805
ABHD13	-0.825524	0.0668258	1.39397	0.400482	-1.2541	0.240844	-1.01225	1.66684	0.184669	-0.861755
PPIC	2.32864	-0.650525	-0.401189	-0.899034	0.257827	0.0582763	-0.0115805	-0.43119	-1.09966	0.848432
PRPF18	-1.02319	-0.284017	-1.39162	0.353085	-0.185493	1.87293	1.29788	-0.544051	0.328949	-0.42448
POLDIP2	1.91243	0.137411	0.294666	0.206687	-0.702829	-0.221049	-1.09067	0.150929	0.921638	-1.60922
MCM3AP	1.20101	0.0027559	-0.810276	-0.374493	0.907983	0.361784	-1.27818	-1.1655	1.61341	-0.458488
SMDT1	-0.537885	-0.663108	-0.283156	-0.476348	0.622698	-1.37492	1.73371	0.522117	-0.844635	1.30152
SPG7	1.35582	-0.669003	0.427634	0.216015	0.0247	-0.94916	-0.225226	-1.34005	-0.658245	1.81752
NKAIN2	-0.214663	-0.551564	-0.551564	-0.0678593	-0.551564	-0.551564	2.69255	-0.0688858	-0.551564	0.416675
UROC1	-0.744874	1.18301	-0.744874	-0.744874	-0.744874	-0.744874	1.65801	-0.744874	0.500347	1.12788
CD247	-0.52176	1.83154	1.14296	0.41766	0.839096	-1.20691	-0.600763	-0.90919	-0.335818	-0.656812
NCAPH	-0.650016	-1.07582	-1.23908	-0.578443	1.07128	0.149155	1.76505	-0.315472	-0.189419	1.06276
CEP164	1.08679	-1.57008	-0.97518	0.7082	-0.52209	-1.21434	0.708607	1.22388	0.291766	0.262437
ADGRL1	-1.03153	-0.203038	0.184931	-0.186023	-1.18053	-1.32585	1.42829	1.2309	0.0251919	1.05766
RSPH4A	-0.525819	0.119593	-1.06056	-1.39724	0.513833	1.21304	0.81068	1.42942	-1.09367	-0.00927775
LAMP1	-0.920507	-0.176983	0.611376	1.6267	-0.480505	0.780266	-1.3713	-0.396681	1.2055	-0.877866
IFIT2	0.109316	1.00622	0.804964	1.5338	0.427334	-0.798986	-1.72157	0.050367	-0.396194	-1.01525
TMEM71	-0.414447	0.621657	0.383658	-0.648413	1.23596	1.79614	-1.42824	-0.232466	-0.371067	-0.94278
LINC01235	1.39421	0.14618	-0.843697	1.4365	-0.843697	-0.843697	-0.843697	-0.843697	0.0545054	1.18709
GPX8	-1.42375	1.38199	1.03609	0.0888928	-0.927455	0.626994	0.799457	-0.00419994	-0.139336	-1.43868
ENTPD5	-0.424684	-0.0617693	-0.337997	1.21536	0.394475	-0.561852	-0.706064	0.774897	1.52885	-1.82121
QPRT	0.182036	0.107713	0.324853	2.11238	-0.0742219	-0.576013	-1.91864	-0.508619	0.0188082	0.331703
CHRNA3	-0.735624	-0.735624	-0.735624	1.16429	0.381996	-0.735624	1.69877	-0.735624	-0.735624	1.16869
CTBP2	-1.17422	-0.345559	-0.586737	0.281097	-0.207911	-0.204144	1.4221	-1.23681	0.208818	1.84336
PRMT2	0.796774	0.7193	-0.085707	0.390568	0.773291	0.7555	-1.95196	-0.92287	0.696499	-1.1714
KRT15	-0.0579153	0.495834	0.0019485	-0.51037	2.07771	1.2117	-0.902566	-0.51121	-0.902566	-0.902566
NPIPB11	0.275734	-0.307943	0.100869	1.50356	-1.17025	1.82464	-1.04093	-0.655612	0.0556306	-0.585697
CSNK1D	1.06028	0.808272	-0.279102	-0.328297	0.192023	-2.00513	-0.209284	-0.0547469	-0.73212	1.5481
OSR1	-1.09698	-0.210723	0.382767	-0.350834	0.245227	2.17944	-0.307865	-1.09698	-0.691071	0.947019
C11ORF58	1.37	0.964896	-0.836263	0.169843	-0.670088	-0.816983	1.25524	-0.938776	0.690895	-1.18876
MORN2	0.753389	0.0279708	-2.17115	-0.411809	-0.13881	-0.220802	1.49429	0.664585	-0.633475	0.635806
MROH8	-1.07389	-0.0147644	-0.0845487	-0.276268	2.02713	-1.18507	-0.743403	0.898963	0.853034	-0.401184
ATP1A1-AS1	-0.713504	1.04857	-0.50668	-0.970874	-0.719141	0.744031	0.306301	1.91111	-1.17054	0.070729
TBC1D2B	-0.166803	1.77317	0.797588	0.307989	1.23277	-1.00583	-1.14767	-0.85924	-0.271172	-0.660803
FOS	1.13339	0.239969	0.0378787	-0.0183517	-0.173898	-0.837242	-1.84939	1.7356	0.343735	-0.611694
ANAPC1	0.352583	-0.579692	-1.85256	-0.0252043	0.209616	-0.610643	1.96519	-0.49391	0.360672	0.673944
PAK5	-0.0132174	-0.532629	-0.532629	-0.532629	-0.532629	-0.532629	1.95479	-0.532629	-0.532629	1.78684
ZNF865	-0.984047	0.169033	0.934912	1.48431	-0.21317	1.09716	-1.37065	-0.323275	0.432931	-1.2272
SURF4	0.204421	0.433752	0.279679	1.2561	0.691636	-1.01554	-2.1931	0.660578	0.233608	-0.551131
PDZRN4	-0.793947	-0.392444	-0.115941	-0.793947	0.98048	-0.793947	1.31143	-0.457287	-0.793947	1.84955
RUNX2	0.0185301	0.163395	-0.559777	1.86128	-0.235215	-0.403672	1.15456	-0.285644	-1.88005	0.166587
HEXIM2	0.356881	-0.868382	1.15308	0.339849	-1.12764	1.99816	-0.635327	-0.294902	0.0360704	-0.957786
NDUFAF2	1.74764	0.0664971	-0.60809	0.0641406	0.309573	0.676194	-0.820692	0.578227	-0.0118992	-2.00159
CDK12	1.14055	-1.53342	-0.0452259	0.120663	-0.715526	1.39795	-0.299284	1.26467	-0.283734	-1.04665
RNPEPL1	0.896009	0.477661	0.450847	0.196804	0.0493668	-0.156399	-1.82916	-1.25325	1.6091	-0.440977
SNORA74C-2	0.126372	1.29887	0.343119	0.148234	1.85235	-0.964154	-0.964154	-0.964154	-0.964154	0.0876688
VASH1	-1.33138	0.409252	0.522484	-0.863189	0.33796	1.67951	-1.05423	-1.03986	0.762273	0.577168
COX7A1	-0.93725	0.915982	0.0896691	-0.414429	0.496182	2.06744	-1.41406	0.0504757	-0.0987908	-0.75522
ORC6	0.264038	-1.41002	-1.34332	-0.593827	0.207985	-0.53686	1.45082	-0.185844	1.14152	1.0055
P3H2	1.13069	-0.916786	0.379677	-0.665559	0.164033	-1.27094	1.42318	-0.832433	-0.644114	1.23226
RPS23	0.166066	-0.0768677	-0.135719	-0.27108	-0.508106	0.488122	2.14326	-1.92916	-0.104541	0.228029
MIOS	-0.643208	-0.426074	-0.78691	-1.17939	-0.160169	1.74625	0.246689	1.40434	-0.896427	0.6949
LINC00630	1.28483	0.21252	-1.1118	-1.1118	0.547979	-1.1118	0.735454	-1.1118	0.578293	1.08814
SUFU	-1.7619	1.74142	0.198783	-0.0290175	-0.271219	-0.562218	1.02179	-0.953784	-0.072462	0.688609
EPB41	-0.520754	0.00477406	-1.05414	0.805883	-0.109147	-1.44047	1.7528	0.110538	-0.695406	1.14593
ARL8B	-1.15968	0.574372	0.0296989	0.702134	0.261271	-0.594877	-0.35714	1.29576	1.09397	-1.84551
EXOC3L4	-0.510648	0.839772	2.35399	0.0502455	0.34767	-1.15844	-0.66176	-0.354742	-0.29005	-0.616033
PATL2	0.836862	1.86338	0.947962	0.277384	0.233302	-0.592115	-0.495927	-1.19733	-1.01511	-0.858414
CLSTN2	-0.768191	0.142439	1.04655	0.313984	0.401535	0.669656	-1.07937	-2.11013	0.766892	0.616635
HINT3	-0.436315	0.259868	0.0766175	1.169	0.191469	-2.36183	-0.0980806	1.21831	0.351503	-0.370544
MTFR1L	0.833254	-0.0742749	-0.619599	1.33933	-0.0172768	1.67724	-1.445	-0.166884	-0.645836	-0.880952
LINC01715	-1.12189	0.611651	0.590006	0.334802	-1.12189	-1.12189	0.760955	1.37236	-1.12189	0.817767
ATF7IP	0.44118	0.207105	-0.577444	-0.603688	-1.79217	1.6534	0.978385	0.503652	-0.94358	0.133156
ZNF236	-1.57828	-0.796578	-0.531971	-0.00976403	-0.360503	-0.347611	1.84379	-0.043686	1.28283	0.541768
DPH3	-0.655627	1.16269	-0.188192	0.0287559	0.409491	-1.44302	-0.51164	1.45766	0.990585	-1.25071
THAP7	-1.85569	0.44534	0.977888	-0.427713	-0.148685	-0.609129	-0.979522	1.36335	0.967784	0.266378
UBQLN3	0.108612	0.407919	0.386711	-1.2906	0.838166	-1.2906	1.49839	-1.2906	-0.197739	0.82975
HPS5	0.996255	1.79492	-0.454814	-0.15544	-1.02957	-0.0845247	-1.24884	-0.121477	1.11797	-0.814473
TLN2	-0.421007	0.382281	-2.0286	-0.333346	-1.23549	0.449909	0.670811	0.543537	1.11203	0.859877
POU6F1	-0.154203	-0.255366	0.134775	-0.715162	-1.62537	-1.00855	1.54971	1.41499	0.554679	0.104495
DCAF8L2	-0.45329	-0.45329	-0.45329	2.73184	-0.45329	-0.45329	-0.45329	0.194003	0.247183	-0.45329
C16ORF86	-1.33612	0.17423	0.831554	0.192423	-0.27157	1.66434	-1.59223	0.188603	0.792136	-0.64337
FOXL2	-0.670885	-0.670885	-0.670885	-0.670885	-0.670885	-0.670885	0.946891	-0.130693	1.9485	1.26061
RELL2	1.45997	0.0396607	0.213603	0.0376086	-0.48271	-1.2788	-1.29009	1.66936	0.280718	-0.649329
THUMPD3-AS1	-1.69726	0.632936	-0.10143	-0.887904	-0.539266	2.05981	-0.282718	0.50889	0.167599	0.139345
CCNB1	-0.402122	-1.88413	-1.00285	-0.635496	0.81841	0.483002	1.59498	0.428457	0.484678	0.115072
SMC4	0.0538156	-1.42311	-1.10776	-1.05252	-0.13868	0.766767	1.80709	0.805104	-0.0479152	0.337213
TOP2A	-0.326601	-1.38699	-1.11022	-0.813883	0.423121	0.319964	1.74281	1.22956	-0.385993	0.308239
ZNF711	-0.508362	-0.480948	-0.173689	-0.466464	-0.175707	-0.0584781	1.81256	-1.05799	-0.712045	1.82112
TSPEAR	1.43904	0.728229	0.967461	-1.06174	0.684443	-1.06174	0.657576	-1.06174	-1.06174	-0.229787
UPF3B	0.80457	-0.442797	-0.133041	-0.881697	0.833098	-1.7485	0.510163	0.904786	-1.04568	1.1991
LOC105377590	1.12629	1.44572	-0.83757	-0.352407	-0.111269	-1.89208	0.188059	0.700918	-0.708647	0.440982
POP5	0.278163	-0.763343	-0.311472	1.85575	0.791168	-1.7232	-0.289009	0.0912955	0.780107	-0.709455
FAT3	-0.830174	-0.775755	-0.417197	-0.316753	0.209961	-0.529929	1.58323	-0.23403	-0.70288	2.01353
TMEM104	0.760883	-0.01461	0.344866	0.579444	0.241821	-2.35879	-0.877736	1.01367	0.654058	-0.34361
SNORD114-5	-0.766317	-0.766317	1.1535	-0.766317	0.791284	-0.766317	1.33984	-0.766317	-0.766317	1.31327
NIPAL2	0.278729	1.04912	0.452961	-0.844333	-0.489567	1.43183	-1.62697	1.03732	-0.471561	-0.81753
KCNIP4	-1.2165	0.750733	0.368966	-1.2165	-0.509499	-1.2165	1.6751	0.230322	0.789634	0.344246
MKNK2	1.65175	0.39775	0.596859	0.304185	0.141708	-1.70469	-0.879218	-0.909357	0.927946	-0.526939
HES2	-0.827653	-0.827653	-0.827653	0.430182	1.92107	1.22405	-0.827653	0.427488	0.135478	-0.827653
TNFRSF21	0.114546	-0.19398	1.40203	1.58269	0.144647	-1.8176	-0.781027	0.146494	0.115786	-0.71358
KRT79	-0.388735	-0.388735	-0.388735	-0.388735	-0.0131555	2.81695	-0.388735	-0.388735	-0.388735	-0.0826461
BHLHE41	0.348486	1.12372	0.0792393	0.413799	0.435054	-0.0602948	-1.32479	1.49743	-1.47004	-1.0426
CCND1	0.0216994	-1.21645	-0.555453	0.672708	0.333804	-1.31862	1.59681	0.311058	1.1379	-0.983455
CTNNAL1	-0.957161	-1.70248	-0.511121	1.3768	1.21048	-0.2	-0.416	1.00968	0.490384	-0.300583
ENSA	-0.175843	0.0496526	-0.484965	-0.169284	-1.00565	-0.555872	2.13023	-0.0554	-1.05088	1.31801
KLHL35	-1.35054	-0.314771	-1.77002	0.516039	0.434117	1.54104	-0.431241	0.869061	0.103165	0.403157
LRRTM2	0.460102	-0.891842	1.23264	-0.99457	0.758159	1.67617	-0.408783	0.104692	-1.12121	-0.815361
APP	2.03634	-0.338659	-1.05148	-1.14046	-1.07606	0.574318	0.1543	-0.177656	0.142437	0.876916
SAC3D1	-0.517612	-0.940892	-0.448619	1.2848	-0.325299	1.58757	-1.0143	-0.722538	1.32824	-0.23136
GPR21	-1.38643	-0.963634	-0.848319	0.131236	-0.12851	2.24857	0.513576	0.185911	0.0504017	0.197203
FAHD2A	-0.148919	1.58919	-0.672106	-0.212876	0.781354	0.638251	-1.9146	-0.910927	0.625466	0.225169
HLA-DRB6	-0.493199	1.01209	1.75546	0.525775	-0.304277	0.742647	-1.40389	-0.0430506	-0.619502	-1.17205
SLC12A4	-0.663942	0.36275	-0.180787	0.757913	-1.33286	0.330425	-1.08717	-0.517662	2.1057	0.225636
LINC02001	0.271174	0.439027	-1.72896	0.662589	0.209981	-1.72896	0.523593	1.08853	0.755355	-0.492322
EDN3	-0.491547	-0.491547	-0.491547	0.0958564	-0.491547	-0.491547	0.749155	-0.491547	-0.491547	2.59581
FRG1CP	0.777699	0.630043	-0.124552	0.236116	0.928259	0.44894	-2.02871	0.486415	0.215797	-1.57001
SPIN2B	1.49795	-0.957708	0.521755	-0.336648	0.0409014	1.48414	-0.475328	-1.34133	-0.968487	0.534761
ACTA2-AS1	0.934263	0.74599	0.506399	-1.01316	0.965856	-0.514436	0.894595	-1.91433	0.167586	-0.772766
CYTH4	-0.336083	0.937049	1.43559	0.375995	1.32386	0.116458	-1.44511	-0.696021	-0.818958	-0.892782
TMEM147-AS1	0.18162	0.922231	1.32762	-1.51066	0.0236129	-1.14251	-0.694172	-0.728306	1.2796	0.340961
MIR584	0.363189	-0.786167	-0.786167	-0.786167	-0.786167	-0.786167	0.454433	2.22673	0.111544	0.774938
LYPD6B	-0.88981	0.724766	-0.88981	-0.88981	0.23789	-0.88981	1.27422	-0.88981	0.66517	1.547
GRIP2	-0.979883	1.96004	0.603327	0.593675	0.0262521	-1.52794	-0.449097	-0.746339	-0.0952831	0.61525
LINC00504	-0.653487	-0.653487	1.17637	2.20019	0.0920444	-0.653487	-0.653487	0.45232	-0.653487	-0.653487
MPG	-0.43907	-0.116472	0.650507	-0.383992	0.176452	1.05836	-0.698712	-2.06245	1.49167	0.323702
UBXN2B	-0.975391	1.23222	-1.07851	0.697717	-0.0547324	-1.58507	1.04144	0.707664	-0.616898	0.631551
RAP2C	1.34247	0.317667	0.614383	-1.58745	1.49317	-1.06222	-0.123546	-0.612519	-0.625804	0.243857
FKBP14	-1.32348	0.517864	-0.531328	-0.324504	-0.0514973	-0.164072	-0.129922	2.43688	-0.722588	0.292646
ICAM5	0.168937	-0.883948	0.359017	1.206	-1.14133	1.74591	-0.754695	0.747967	-0.922388	-0.525466
ADAM17	-0.116917	1.11096	-1.15687	0.830666	-0.253366	-0.65101	-0.877012	-0.286312	-0.604836	2.00469
SOX17	-0.500679	-0.424074	0.460747	0.236937	0.688928	-1.98561	0.633552	-0.671316	-0.171239	1.73275
SOD2	0.482631	1.56305	1.17613	-0.171351	0.935962	-1.00525	-1.09807	-0.161075	-0.467077	-1.25495
AMBRA1	0.276984	0.816137	0.0700106	0.973809	-2.44191	0.508679	-0.110969	0.806258	-0.360462	-0.538538
ZNF671	-0.688852	-0.258321	0.624939	0.806696	0.108792	0.93927	-1.88889	1.01028	0.600676	-1.25459
RPS10P7	1.66457	-0.327616	-0.254475	0.419572	-0.489614	0.377086	-1.47904	1.4999	-0.52172	-0.888665
CNTD1	-0.0242398	-0.229834	0.269024	-1.51713	0.741223	0.247293	-0.372491	1.7645	0.638796	-1.51713
BST1	-0.627477	0.90869	0.557417	-0.258106	-0.302898	-0.729261	-0.920456	1.35421	1.44044	-1.42256
TMEM56	-0.527756	0.738739	-0.0589124	-0.963662	0.196419	-1.61518	-0.132609	2.10539	0.366302	-0.108726
SKAP1	1.72092	1.15699	0.307235	-0.314169	1.09993	-0.677906	-0.781066	-0.880572	-1.06181	-0.56955
MAPK13	-1.12056	1.05298	1.37829	-0.587403	0.574047	1.25814	-0.704667	-1.34204	-0.414628	-0.0941494
TMEM54	0.0302347	1.26053	-0.420441	0.339401	-1.76728	0.526894	-0.851876	-0.329473	1.64248	-0.430471
ZNF528-AS1	-0.0630621	-1.27375	-1.27375	0.456452	-1.27375	0.157141	1.18734	1.26124	-0.116788	0.938905
MVD	0.87889	-0.517293	0.125719	-0.118913	0.639123	-2.24821	0.450706	-0.437283	-0.198673	1.42593
NOXA1	0.354088	-0.987933	1.22956	0.861575	0.0890268	-0.177227	-1.83702	-0.588172	1.34256	-0.286458
ZNF69	-0.806759	-0.571428	0.210637	0.670961	0.135383	1.52148	-2.02863	0.404532	0.867619	-0.403798
LILRB4	-0.38446	1.26177	1.26372	0.379022	1.07267	-1.14626	-1.30793	0.141976	-0.138121	-1.14239
LINC01061	1.06909	0.233685	0.672614	-0.720263	-1.24745	-1.07722	1.51886	-1.05467	-0.2034	0.808752
NAIP	-1.26879	0.468376	0.733726	-1.23534	0.556795	1.04835	0.808699	0.326381	-1.69444	0.256247
GRB10	-2.08654	0.89258	-0.0366814	-0.957763	-0.397312	-0.48058	0.618685	1.04575	0.904895	0.496965
BEAN1	-1.07399	-0.639459	-1.21232	0.473236	0.509739	1.50995	-1.00117	0.557147	1.30647	-0.429602
RHBDD3	-0.97258	-0.307669	1.59716	-1.73503	-0.768983	-0.259287	0.693058	0.855877	0.199683	0.697777
POTEF	-0.643609	0.491144	-0.628123	-0.387498	-0.57274	-0.572545	0.578704	-0.247949	-0.555019	2.53763
SNORA63C	-0.130902	-0.145555	-0.173214	-0.500251	0.4126	-2.38914	0.0448712	0.817456	1.06837	0.995767
ANO8	0.0363861	-1.15513	0.668825	0.297167	-0.00731481	-0.693233	-1.66499	0.883543	1.7552	-0.120445
AP3S1	1.05416	1.03559	-1.03982	0.00241702	0.333905	-1.3101	0.324193	1.42389	-0.676815	-1.14742
C21ORF33	1.46418	-0.346568	0.648753	-0.641866	0.00394675	0.310759	-2.15949	1.03476	-0.26457	-0.0498918
DDIT4	1.50524	1.28149	-0.549895	0.156791	0.534698	-1.56087	-0.00450529	-0.691506	0.482592	-1.15403
UBAP1L	-0.895928	0.672771	0.689096	-0.606328	-0.492773	0.605982	-0.669496	-0.962783	2.16016	-0.5007
NIF3L1	-1.14226	-0.103525	-1.23877	-0.18822	0.823705	-0.0970428	1.63798	-1.09978	0.18288	1.22503
LOC101928020	-0.020186	-1.76143	1.39773	-0.548688	1.21284	0.950497	-0.831256	-0.555978	-0.279184	0.435653
ZNF584	0.391606	0.605234	0.936069	-0.866574	-0.229852	-0.515122	-1.50654	0.387084	1.77691	-0.978817
HS3ST2	0.247073	0.325377	-0.637104	0.743305	0.740427	-1.32284	0.0298542	-1.32284	1.8453	-0.648541
DDX56	-0.56643	-0.241822	0.417271	-1.31033	-0.0768254	1.49804	1.30883	0.330319	-1.61064	0.25159
KAZALD1	-0.196033	1.72956	-1.19466	0.28027	-1.09789	1.2108	-0.907182	-0.730224	0.33647	0.568885
MPP5	-1.14962	0.678512	-0.0335605	0.255715	-0.0578025	-0.485885	-0.730618	2.36684	0.0367293	-0.880316
EBI3	-0.0955381	2.02712	1.21075	0.0788918	-0.213403	-1.29144	-0.936377	0.381056	-0.572689	-0.588372
SCAND2P	0.504901	0.0997476	0.567072	-1.25217	-0.308254	0.875876	0.391055	-2.11765	0.0821177	1.1573
MAP3K3	0.669016	0.0392045	0.48173	0.833492	-0.256922	0.256572	-2.02015	1.1624	0.248315	-1.41366
LOC105372419	0.753833	-1.74484	0.586721	1.24281	0.557727	0.147616	0.181068	-1.74484	0.219879	-0.199967
NECAB2	0.195571	-0.712104	-0.269256	0.306396	-0.396872	-1.18424	1.55462	-1.18424	-0.0154035	1.70553
NDUFB9	0.224001	-0.744702	-1.01708	0.935555	0.574309	1.04046	0.756156	-1.61052	-1.05251	0.894332
GBA	0.0613736	0.844364	-0.437241	2.12824	-0.126119	-0.695913	-1.26924	0.169488	0.435515	-1.11047
DCSTAMP	-0.864071	-0.058771	-0.424345	0.188574	0.581089	-0.900474	-0.581276	2.2988	0.665962	-0.905489
TSSK6	-0.358103	-0.0180246	-0.0421215	0.334653	-0.0664054	-1.94791	0.744029	0.329809	1.88539	-0.861309
GALE	-0.422138	0.362518	-0.864272	1.33418	1.40379	-0.448462	-1.35041	-0.684256	1.1936	-0.524542
SMTN	-0.496455	-2.17219	-0.0251627	-0.242065	1.12479	1.54051	0.303921	-0.234456	0.392135	-0.191025
ZNF441	0.44219	0.117269	1.63441	0.294563	-0.41766	-0.606919	-1.73137	1.23506	0.0156231	-0.983169
ETV2	0.235709	-0.581878	0.410376	0.159392	0.527209	-2.33301	-0.539381	1.37334	0.716345	0.0318922
LINC02552	-0.575501	0.955102	-0.575501	-0.575501	-0.575501	-0.575501	2.26005	-0.575501	0.813349	-0.575501
MOV10L1	-1.57763	-0.775833	0.149256	-0.903881	0.231502	0.9692	0.675724	0.153805	-0.689042	1.7669
MIRLET7F1	-0.321708	-0.60848	0.0839825	0.558784	0.149474	2.24106	-1.61433	0.371666	-0.584921	-0.275525
SFXN2	-0.689418	-0.589224	-0.79183	0.0185857	0.762101	-0.886707	1.63973	-1.09033	0.112882	1.51422
DNAJB5	-1.62971	-0.793412	-0.0576816	0.0573584	0.742785	1.3173	-1.02581	1.50912	-0.264895	0.144946
STMP1	1.8864	-0.429637	-0.878202	-0.0875668	-1.00138	-0.766381	1.61364	0.261569	-0.43449	-0.163954
CRYM	0.383546	-0.795223	-0.356621	2.10437	0.610905	-1.72127	-0.0254864	0.0319116	-0.503624	0.271489
BEND3	-1.24252	0.279209	-1.16467	-0.302054	-0.995256	1.60689	1.35722	0.0361523	0.673065	-0.24803
EPHA1	-0.0344386	1.87654	1.07716	-0.0114127	0.942869	-1.24366	-0.7373	-0.301817	-0.877253	-0.690681
LOC730098	0.531145	0.681904	0.803343	0.0205503	0.820408	-1.71211	-0.280616	-1.71211	-0.139081	0.986566
RHOT2	1.09086	-0.667938	0.563371	0.184279	0.137049	0.0589947	0.314671	-2.53865	0.229939	0.627418
ZNFX1	-0.094568	1.55873	0.444741	1.1286	0.0427952	-0.0796178	-2.16786	0.0275784	-0.355349	-0.505046
ABCC6	-0.676316	0.582776	1.45194	-0.816113	-0.380197	-1.18389	0.757007	-1.18389	0.0691004	1.37957
NPW	0.198625	0.495916	-0.0102105	-1.20785	-0.522247	-1.20785	1.36759	-1.20785	1.0833	1.01056
TAF6	2.1337	-0.122599	0.00353944	0.0140743	-1.62725	-0.152872	1.04663	-0.696616	-0.277624	-0.32098
PTER	1.62634	0.312345	-1.43224	0.12372	0.963694	-1.47453	0.847206	-0.178575	-0.276047	-0.511913
UNC5D	-0.63143	-0.63143	-0.63143	-0.63143	-0.185738	-0.63143	2.12878	0.0263303	-0.337289	1.52507
WNT3	0.865649	-0.0691726	0.345847	-1.28091	0.379163	-2.18901	0.193925	0.565901	1.08713	0.101485
SCN1A	-0.247672	-0.00661928	-0.335279	-0.875598	-0.616829	-0.875598	1.54989	0.387722	-0.875598	1.89558
WDR27	0.187481	-0.819532	0.476879	-1.54163	-0.822701	-0.0569577	1.7218	-0.688967	1.20681	0.33681
RCE1	-0.546908	0.0480232	-0.585542	0.166731	1.66413	-2.21483	0.152795	0.447655	0.596327	0.271617
UBE2L5	-0.74237	0.380464	-0.606786	0.690662	2.19788	0.161197	-0.688214	0.238134	-1.42453	-0.206433
C6ORF52	0.101592	-0.0801546	-0.213146	-0.33208	-0.717068	-1.74799	0.537797	2.22316	0.125309	0.102585
NBPF20	0.255071	-0.707473	-0.0303869	-1.42339	0.32157	-0.905091	1.55144	0.667346	-1.0038	1.27472
EEF1AKMT4	-0.150733	-2.31651	0.783043	0.352902	-0.39181	0.897022	-0.395498	1.32405	-0.0367478	-0.0657243
CDC20B	2.57935	0.41801	-0.80599	-0.80599	-0.313448	-0.80599	0.140323	-0.0754295	-0.0154079	-0.315428
LOC283335	1.22977	-0.71884	-0.537706	-1.40793	-0.825067	0.778902	1.02623	-0.251589	-0.658394	1.36462
DDX43	-0.531554	-0.333679	0.31763	-0.337779	-0.313875	1.21789	-0.896969	-0.680281	2.25026	-0.691639
OR6A2	0.00835378	-0.741519	-0.281837	-1.40901	-0.0343605	1.52701	0.9774	-1.40901	0.379065	0.983911
LPAL2	0.0620467	-0.233051	-0.308992	-1.04276	0.625487	1.61058	0.272361	-1.87339	-0.187023	1.07474
PIK3R4	0.0233245	-1.15322	-0.166327	0.276438	-1.65985	0.96571	-0.309227	0.270378	1.91872	-0.165949
PRC1	-0.878116	-1.46645	-0.746771	-0.66936	1.49983	-0.274032	1.33614	0.616386	-0.163439	0.745816
NPAS3	0.150247	0.718996	0.716479	-2.36926	-0.625027	0.821014	0.23401	0.849442	-0.677931	0.182026
THAP11	-0.864567	-0.15329	0.186945	-0.128197	-0.733196	1.29303	-0.543449	-1.03796	2.13792	-0.15724
PMEL	-1.37273	0.638673	0.429431	0.485038	0.821923	0.353142	-1.43953	0.653534	0.904012	-1.4735
DDX21	-1.33714	-0.0945086	-0.937854	0.778168	1.13541	-0.593255	1.83815	-0.494094	0.305592	-0.600474
IQCG	0.509314	-1.48369	-0.807274	0.598889	0.360539	0.39789	-0.898169	2.00438	-0.0377171	-0.644154
SP6	-0.481831	-0.157929	-0.180879	0.177973	-0.5297	-1.99602	0.000380373	0.648663	0.619545	1.8998
SLC41A3	2.12053	-0.301275	0.601758	0.141477	-1.21586	-1.32361	0.101758	-0.613143	0.628014	-0.139651
SRSF9	0.284841	-0.401359	-0.428945	-1.27656	-0.931984	-0.252272	2.41835	0.0802417	0.135038	0.372645
MRPS35	0.391397	-0.496322	-0.550905	-0.562477	-1.22658	-0.132621	2.38013	-0.0884801	-0.467323	0.753185
DLST	0.0546728	0.270943	-0.219869	1.20009	1.18984	-1.16477	0.397377	-1.7926	0.835045	-0.770714
CCDC87	-1.7516	0.751439	-1.00327	0.212646	1.04155	0.232317	0.727562	0.37824	-1.37399	0.785114
MRC1	1.22037	0.155098	0.717678	1.51785	-0.354577	0.108161	-1.42158	-0.544288	0.0864453	-1.48515
NDRG2	1.69091	-0.326871	1.67923	-0.917122	-1.01817	0.1146	-0.248149	-0.065307	-1.10423	0.195107
UBE3A	0.441971	-0.790355	-1.13345	-0.892656	1.71321	0.59871	0.523558	-0.913417	-0.666571	1.119
TMEM50B	1.59917	0.715296	-0.0463735	-0.0467141	-0.582068	-0.277336	-1.89347	0.356042	1.03207	-0.856609
IL6	-0.267528	1.40102	1.61836	-0.390548	0.112386	-1.35575	-1.35575	0.632186	-0.315049	-0.0793212
HDAC8	1.85162	-1.01567	-0.0743544	-0.99536	-0.82856	1.4984	-0.303232	-0.131586	-0.50196	0.500705
NRK	-0.555157	0.198126	-0.244632	-0.638794	-0.710799	-0.499925	1.86857	-0.639266	-0.568633	1.79051
LOC145694	-1.7008	1.31958	-0.385522	1.45913	0.441109	0.396716	-0.759377	-0.0863607	-1.01972	0.33525
PPM1D	-0.653721	0.261454	-0.326343	0.734785	-0.727518	-1.40596	0.317959	1.87143	-0.970367	0.898289
OR10AG1	-0.465408	-0.465408	-0.465408	-0.465408	-0.465408	-0.465408	2.27139	-0.465408	-0.465408	1.45187
PSMB1	-0.405485	0.442962	0.417226	-0.111109	1.77679	-1.8324	0.531785	0.694621	-0.871835	-0.642562
MEF2A	1.4996	0.650846	-0.974434	-0.0696272	1.54321	0.204543	-0.613221	-0.37211	-1.52142	-0.347388
TMPRSS6	-1.15919	0.957158	1.24001	1.51966	0.0477732	-1.15919	-0.378706	-0.121131	0.212818	-1.15919
SAR1B	0.84647	0.35177	0.102162	0.612402	0.691659	-0.25624	-1.2145	1.48068	-1.03771	-1.57669
SMCHD1	-1.72337	0.663793	-0.977366	0.207264	0.160993	-0.613204	1.90244	0.660959	-0.356913	0.0754012
ARL6IP6	0.0786612	-0.141365	-2.33029	0.29062	1.08909	0.0106377	1.19986	-0.800274	0.227608	0.375463
DNAJC17	-0.0962392	0.257084	1.84566	-0.0296987	-1.18351	-0.898587	0.0614773	-1.46861	0.805535	0.70689
DGCR2	-0.858838	0.436814	1.63109	-0.201093	-1.04065	-1.45731	-0.416309	1.35288	0.337054	0.21635
TBC1D3P1-DHX40P1	0.426358	0.984587	-0.379426	-0.0105793	-0.403199	-2.24512	0.634296	-0.660958	0.443291	1.21075
RWDD2B	-0.245513	-0.431394	0.351252	-0.665168	-0.581075	2.19211	-0.635099	0.529991	0.797881	-1.31299
RHOBTB2	0.953635	0.143268	1.20169	-0.161056	-1.39552	-0.959109	-0.068084	-0.16433	1.5664	-1.11689
TRIM56	1.29246	1.08167	1.68782	-0.956219	-0.585244	-0.137472	-1.13531	-0.15952	-0.797629	-0.290556
CPVL	-0.279741	1.66461	-0.251843	-0.0996505	-0.0238894	-0.155964	0.160727	1.30879	-2.06028	-0.262764
DDX60	-0.206654	1.39347	0.841201	1.04983	-0.253074	-1.35058	-0.546073	1.03482	-1.08648	-0.876452
HILPDA	1.06877	0.468522	-0.559358	0.174796	-1.07041	-1.34596	1.67899	-0.848638	-0.376781	0.810067
PSMG3-AS1	0.574551	0.957983	-0.121164	-1.74469	0.727658	0.0307804	-0.656996	1.62934	-0.922645	-0.474817
GGN	0.405625	0.390251	1.96668	0.45227	-0.330142	0.332943	-0.473831	-1.96382	-0.443323	-0.336655
ACTB	-2.21075	1.30888	0.967296	-0.44483	0.819121	-0.156984	0.231671	-0.00403493	0.184339	-0.694701
FAM66C	0.979008	0.680222	-1.22094	-1.22094	-0.455907	0.63394	1.14864	-1.22094	-0.350204	1.02713
PDCL3P4	1.85919	-0.336986	-0.203089	-0.581219	-0.089212	-1.98039	0.400895	0.0169928	-0.0638291	0.977652
DCAF13	-0.486366	-0.77736	-1.49011	0.995857	-0.402152	0.12752	1.818	0.680962	-0.900795	0.434444
TRMT10B	0.652898	0.657126	0.723715	0.119315	-0.25256	-2.38131	-0.325435	0.915452	-0.732669	0.623469
SCAMP2	0.346228	1.49408	1.04969	0.91822	-0.0676333	-1.2586	-1.4444	-0.616586	0.318243	-0.739245
POLR2I	0.699077	-0.0934485	0.309463	1.12258	0.73967	-0.0429069	-1.08695	-0.258728	0.786319	-2.17508
HTATSF1	1.10228	-0.8053	-0.0565802	-2.15686	-0.0436609	-0.415531	1.39427	0.442332	0.165331	0.373721
CASP12	2.60665	-0.127839	0.300038	-0.306091	-0.249459	-0.155287	-0.0321405	-1.25535	-0.527089	-0.253436
GRHL3	-0.685259	-0.0572597	-0.685259	-0.685259	1.15349	1.89664	-0.685259	1.11869	-0.685259	-0.685259
NKILA	-0.866032	-0.866032	-0.866032	-0.866032	0.329593	0.592784	1.30317	0.390128	-0.866032	1.71449
CYBB	-0.0816986	1.19128	1.23995	0.366954	1.04155	-0.922828	-1.447	0.422661	-0.741795	-1.06907
TMEM214	0.903394	0.96032	0.66903	1.10822	-0.0804187	0.302259	-0.468972	-2.04202	-0.372086	-0.979721
ARL9	-0.234281	1.01793	0.511054	-0.878511	1.35339	-1.68853	0.759979	-0.703135	-0.814509	0.676613
PLOD2	0.89398	-0.601333	0.490174	-0.543686	0.00803978	-2.04692	0.94163	0.203716	-0.665552	1.31995
ASNA1	0.0944221	0.585297	0.291314	1.52564	-0.18022	0.232382	-0.796677	-0.00667789	0.539969	-2.28545
IL20RB	-0.280444	-0.441135	0.270338	-1.21442	2.12842	-0.487447	0.343459	-1.21692	-0.0030731	0.901218
GSDMA	0.00347454	-1.26285	-0.182002	-0.341518	1.93862	1.54044	-0.570197	-0.343474	0.0417564	-0.824253
SZRD1	0.582241	-0.073126	-1.0386	1.6034	-1.17489	0.0924095	0.535865	1.27213	-0.684405	-1.11502
AZIN1-AS1	-0.159557	-0.17201	1.94173	-0.121777	-0.377679	-2.07871	-0.0101773	0.419837	-0.147393	0.705736
TGFBR1	-1.07827	-0.956886	-0.673208	0.455628	1.45483	0.462364	-1.28984	0.95823	1.08396	-0.416802
TMTC3	0.564676	-0.388924	-1.66052	-0.547437	-0.0859982	-0.371082	1.65876	1.47259	-0.00353848	-0.638535
RPS14	1.13009	-0.218145	0.751669	0.666311	0.0572654	-0.29077	0.719929	-2.28257	-0.861709	0.32793
IRF5	0.265211	0.883912	1.26127	0.459519	0.713466	-1.58348	-1.57213	-0.039933	0.431204	-0.819037
FABP7	0.358639	1.26647	0.150346	-1.74703	-0.0158342	-1.74703	0.650496	0.811046	0.0310491	0.241843
LMX1A	-0.469621	-0.469621	-0.469621	-0.469621	-0.469621	-0.469621	1.57994	-0.469621	-0.469621	2.17703
B9D2	0.60933	1.41225	0.882582	0.147023	-0.20603	-2.15164	0.0050635	-1.03663	0.0466944	0.291351
SNORD50B	-1.23923	1.23105	-0.410736	-0.619887	1.64855	-0.90632	0.861329	-0.46453	-0.71871	0.61848
FAM27E2	0.854046	0.381153	-1.37716	-0.160619	-0.890207	0.976785	-0.416952	1.66185	-1.21853	0.189631
RENBP	0.935748	0.410565	0.540098	0.342877	0.369072	0.441523	-2.50677	-0.0728235	0.410273	-0.870567
C16ORF47	1.50333	-0.782853	0.342027	-1.75781	-0.318021	1.09792	-0.15692	0.0369971	-0.873146	0.908468
CSNK1G3	0.344505	0.203856	0.567347	0.42299	-1.12031	0.738487	1.01396	0.84976	-1.84666	-1.17393
APOBR	-0.827917	1.11105	1.2453	0.422668	1.42747	-0.481545	-0.9466	-0.552506	-0.0271238	-1.3708
ZNF876P	-0.899156	-1.46336	1.34797	0.847061	0.879441	-0.060174	-0.0516329	-1.2154	1.03886	-0.42361
ZNF143	-0.423904	-0.123933	-0.602074	0.058157	-0.64377	-0.724685	2.37445	-0.573643	-0.481159	1.14057
SAYSD1	-1.81166	0.128945	0.277721	0.301835	-0.772416	1.6457	-0.152337	0.348594	-1.00368	1.0373
ANXA2P2	-0.729778	0.190641	0.364244	1.16099	0.544405	0.301182	-1.04165	0.18659	1.08755	-2.06418
DMAP1	0.7134	-0.686468	-0.941739	0.718492	-0.547696	-0.95561	2.2345	-0.437827	-0.375761	0.278709
CELF5	-0.181048	-0.11194	-1.52065	0.484379	0.338705	-1.52065	0.0845907	-0.334984	1.2258	1.53579
PNLIPRP2	1.1697	-0.836575	-0.836575	-0.836575	-0.836575	-0.836575	0.853048	0.093	1.82719	0.239943
KRAS	0.00978874	0.0339028	-1.53909	-1.27605	0.526884	-0.404989	1.86592	0.158219	-0.342188	0.967602
FOXN4	0.0796751	-0.644058	-0.644058	-0.644058	0.339154	-0.644058	1.24634	-0.644058	-0.644058	2.19918
TLR7	-0.309415	1.28379	0.80112	0.041137	0.807108	-1.91909	-1.01931	0.9854	-0.188083	-0.482659
WBP2NL	0.553417	-0.288996	-0.257586	0.0453435	-0.406174	-1.76334	1.2728	-0.117668	-0.777997	1.7402
PODXL	-0.463805	-1.24026	-0.48502	1.27145	1.43687	1.15594	0.0412549	-0.957469	-1.007	0.24803
SPATA7	-0.354464	-0.788263	-1.5482	-0.549458	1.19567	-1.00725	1.17942	0.801297	0.0340801	1.03717
SUMO2	-0.668581	0.176095	-1.13712	0.125733	0.231859	-0.954359	1.76852	0.968775	-1.26834	0.757422
ELOF1	1.45329	0.419776	0.078346	0.743307	0.01026	0.619224	-0.914295	0.364369	-0.697003	-2.07727
SZT2	1.08301	-0.442945	-0.372152	-0.0600455	-1.95817	1.43883	0.877843	0.341768	-0.831147	-0.076987
PUS10	0.489235	1.24772	-0.971462	0.200599	-0.136183	1.04423	-1.94988	0.544429	0.437458	-0.906143
GAS2L3	0.783399	-0.930384	-1.64393	-0.0142249	-0.157145	1.24783	0.425993	1.44589	-0.195096	-0.962331
ZNF619	-0.411457	0.372469	0.573329	-0.977462	1.45006	0.395313	-0.943595	0.595054	0.767224	-1.82093
CTRL	-0.262459	-0.424841	1.38612	-0.951084	0.117662	-1.35364	0.227338	-1.08802	1.37985	0.969067
LOC101928673	0.216412	1.17175	0.661121	-2.1226	0.351394	0.352418	-0.152753	0.472501	0.444635	-1.39488
ZFHX2	-0.211279	1.22896	1.4571	-0.678687	-0.0959309	-1.99433	-0.299901	-0.46047	0.618667	0.435868
AP3B1	1.37334	-0.920857	0.373488	1.15405	0.878885	0.101135	-0.592871	-1.32147	0.304022	-1.34973
TNNT1	1.31867	1.68994	-0.848478	-0.753098	-0.319604	-1.33894	0.346542	-0.830345	0.635348	0.0999707
HERC1	0.958394	-0.0631926	2.14212	0.0533552	-0.140506	0.471263	-0.99792	-0.41382	-1.17458	-0.83511
UTP23	0.251721	0.0286892	-0.936199	0.453332	-0.858646	0.219922	1.90137	-0.515367	-1.50508	0.960257
P4HTM	-0.518121	0.87812	0.973427	-0.385706	0.991279	0.0834583	-1.92187	-0.893879	1.12715	-0.333853
ZBTB41	0.448473	0.818816	-0.998368	-0.26802	-1.03019	-1.30333	0.153247	2.03335	-0.183115	0.329145
MBOAT7	0.953923	1.23596	0.209068	-0.158075	-0.527802	-2.03831	-0.228309	-0.708061	1.2271	0.0345058
ART3	0.337963	0.989086	0.394764	-1.22177	-0.126531	-1.22177	1.98635	-0.275438	-0.853617	-0.00903113
GMPPB	-0.87171	-0.300417	1.10016	-1.04309	1.6115	0.194022	-1.04717	1.07278	0.239079	-0.955164
METTL16	0.921098	1.63078	-0.871444	-1.17324	-1.36729	-0.465943	0.521204	0.90457	-0.345473	0.245736
RPS13	0.207695	-0.180895	-1.40388	-0.240496	-0.379172	0.302617	2.3669	-0.93249	-0.148157	0.407872
TARID	0.895003	0.668893	-0.746859	-0.746859	-0.746859	-0.746859	1.73209	-0.746859	-0.746859	1.18517
SNCB	0.0430165	-0.934053	-0.934053	0.280726	0.393323	-0.934053	-0.184907	-0.934053	1.83403	1.37002
CEL	0.115039	-1.00634	0.175753	-0.768536	-0.815603	1.46642	0.259696	-1.43163	0.550113	1.45508
FAM91A1	-1.11955	1.65646	-0.828056	1.32753	-1.05927	-0.434906	-0.267363	1.04046	-0.0166345	-0.298665
CHERP	1.38588	-0.699757	0.83004	-0.404099	-1.37749	0.518499	1.35088	-1.26384	0.0433335	-0.383453
SLURP1	-0.316228	-0.316228	-0.316228	-0.316228	2.84605	-0.316228	-0.316228	-0.316228	-0.316228	-0.316228
TSPAN10	-0.718228	0.979822	0.368072	0.498986	-0.120324	0.051208	-1.60412	1.18214	0.895435	-1.533
TIGD2	0.185149	1.04745	-0.463147	0.289605	0.431501	-1.35267	-0.335465	1.93979	-1.15509	-0.587119
FRAS1	0.660591	-1.06696	0.667525	-0.668603	-0.680594	-1.07938	1.16559	-1.09557	0.778608	1.31879
TULP2	2.33324	0.331521	0.317838	-0.764348	0.609111	-0.764348	-0.764348	-0.764348	0.23003	-0.764348
TATDN3	2.07751	0.524403	-0.247751	-0.201333	-1.78621	0.616645	0.127438	-0.725636	0.0517356	-0.436798
LINC02581	1.17038	-0.348163	-0.96254	-0.464546	-0.0568926	-1.5331	1.09003	-0.892265	0.867075	1.13003
GIT2	1.31565	1.00116	0.355812	-0.315168	0.702206	-0.971181	-0.647641	-0.71934	0.944499	-1.666
LOC100506688	1.79398	1.455	-0.187941	0.363541	-0.552325	-0.20285	-0.856564	0.212472	-0.611976	-1.41334
CFAP77	-0.747121	1.24938	-0.747121	-0.747121	0.396238	-0.747121	0.157892	-0.747121	2.10615	-0.174056
ABHD2	0.659769	1.24728	0.707337	0.00282572	0.687843	-0.35672	-1.11167	-1.78568	0.835478	-0.886463
RNASE1	1.29727	-0.649427	2.04445	0.229942	0.248784	-0.521458	-0.138737	-1.10769	-0.479956	-0.923185
ABCB1	-0.399108	2.24358	0.177888	-0.628013	0.228817	0.777024	-0.0107446	-0.294556	-1.51848	-0.576401
PPT1	0.685004	0.580826	-1.49891	1.16669	-0.717557	-1.07928	1.31439	0.508997	-0.00145462	-0.958693
POC1A	-1.07731	-1.39723	-0.482669	0.392986	1.63457	0.305818	-0.232735	0.550727	1.23232	-0.926474
DUOX2	-0.799498	-0.217697	-0.0481449	-0.66474	-0.216615	0.63851	0.837451	-0.665683	-1.10876	2.24517
EMC3	-0.341149	0.409258	-0.0932376	0.782952	0.756248	-0.142149	-1.31378	1.19216	0.711523	-1.96183
EBF3	-0.792404	-0.78474	0.149455	-0.433742	-0.19663	-0.123975	1.85267	-0.781139	-0.634831	1.74533
PLSCR4	1.46455	-0.894563	0.944806	-1.62394	0.110974	0.607566	-1.32923	0.273271	0.541331	-0.0947668
OPCML	-0.906837	-0.906837	-0.906837	1.44299	0.475439	-0.906837	0.633095	-0.906837	0.664456	1.31821
C19ORF53	1.09695	0.557034	0.529929	0.334109	-0.460627	-2.41318	0.0502152	0.491511	0.538284	-0.724229
CARMIL3	-1.43785	1.34862	-0.690696	0.516496	-0.287715	-0.542511	-0.748813	1.3352	1.12562	-0.618353
DACT1	-1.56062	0.947028	-0.71257	-0.695985	0.342984	-0.931746	1.54992	-0.345055	0.403114	1.00293
DTD1	2.10767	-0.209359	0.275231	-0.229219	-0.967225	-0.137406	-0.157543	-1.67996	0.706638	0.291169
RORA-AS1	0.75551	-1.12469	-1.12469	0.447991	-0.373	1.95796	0.319519	-1.12469	-0.269141	0.535227
ZMYM2	-1.18012	-0.851527	0.0664145	-0.722959	0.593968	0.325264	1.81597	-0.966435	-0.328371	1.24779
ISOC2	1.00157	0.495919	1.58366	0.874364	0.103359	-1.27058	-0.779032	-1.07674	0.104845	-1.03737
CCDC157	-1.12649	0.0152968	-0.182354	-1.54576	-0.772638	1.20187	0.543159	0.868551	-0.42788	1.42625
CABP7	-0.610743	-0.16112	-0.610743	-0.232926	2.77309	0.00552887	-0.210947	-0.233735	-0.610743	-0.10766
DHRS4L1	-0.470155	0.934128	0.340038	-0.0539591	0.984167	-2.52113	-0.0438659	0.604848	0.299869	-0.0739413
IQCK	-0.566136	-0.0342399	0.350189	-0.282649	0.769444	0.503782	0.557599	-0.803032	-2.05741	1.56245
H1FX	-0.323848	-0.500491	-0.0884861	-1.02296	0.132408	-0.237381	1.05176	-1.65707	1.03708	1.60899
DIABLO	-0.889504	0.644156	-1.65578	-0.314389	-0.472864	1.73979	0.812667	0.86036	-0.221026	-0.50342
CLUAP1	0.37777	-0.315359	1.04615e-05	0.736934	-0.160718	0.104379	0.683477	-2.45065	-0.256287	1.28044
CARS	0.288049	-0.308696	-1.18499	1.5829	-0.889577	0.571905	1.17178	-0.266914	-1.45283	0.488375
MINCR	-0.0103228	1.13417	-1.63291	0.0222054	0.287388	-1.63291	1.11453	0.691771	0.549976	-0.523903
SMIM1	0.678188	0.257738	-0.791859	-0.378645	-0.248806	-2.04589	-0.371551	0.721868	1.54915	0.629799
TEX30	-1.33734	0.33099	0.0894636	0.143335	-0.502858	0.0335819	-0.912506	0.892633	2.11337	-0.850661
GOLGA6L10	-0.293182	-1.20409	-0.595852	-0.432931	0.116718	-0.604796	1.45165	0.217255	-0.647049	1.99228
LOC654342	1.01206	-1.02663	-1.02663	-0.219862	1.07901	-1.02663	0.843625	-1.02663	0.0373949	1.3543
MDS2	-0.803711	-0.803711	1.94771	-0.803711	0.975666	-0.803711	0.0913555	-0.803711	1.00816	-0.00433684
LIN52	-1.98401	-0.217962	-1.01913	1.02606	0.773432	1.3651	0.2066	-0.367405	0.470453	-0.253125
OR2M2	0.293527	-0.626232	-0.626232	-0.626232	0.0107451	-0.626232	2.27369	-0.626232	-0.626232	1.17944
DERL1	-1.43407	0.827576	-1.05885	1.03584	0.132606	0.183794	1.08155	-0.501721	-1.26385	0.997128
RPS15	1.1743	0.567397	0.325615	0.45539	-0.739936	0.46669	-0.422038	-1.6624	1.19519	-1.36022
UTP6	0.642595	-1.3499	-0.351016	0.318588	-0.703431	0.930776	1.20566	1.19701	-0.442185	-1.4481
USH2A	1.47286	-1.26523	0.1959	-0.178144	1.00693	-1.26523	0.131519	-1.26523	0.232328	0.934301
SRSF1	0.163621	-0.387444	-0.64417	-0.841675	-0.195518	0.165181	2.05879	-1.08033	-0.603737	1.36529
MTRNR2L2	1.58456	0.982764	-0.123503	1.08129	-0.0697636	-1.84126	-0.226038	-0.523421	-0.782262	-0.0823679
ANKRA2	1.51325	1.36867	0.10713	-0.00153106	-0.769351	0.998989	-0.910126	-0.591303	-0.316751	-1.39898
GUSB	0.669865	1.48206	0.323312	-0.653198	1.05768	-1.2482	-0.51115	-1.50311	0.717223	-0.334466
RPL21P28	-0.940933	-0.0865043	-1.30809	-0.110974	1.44855	-1.33412	1.30239	0.296749	-0.109278	0.842214
BIRC7	0.629542	0.509465	0.65526	0.293671	-0.142857	0.455917	-1.98838	0.485074	0.777606	-1.67529
KIAA2013	-0.825686	-0.403365	0.432733	1.6655	-0.656617	-0.548953	-0.835375	-1.09066	1.21851	1.04391
C8ORF48	0.688805	0.58174	0.998181	-0.0371684	0.709909	-1.76141	-1.76141	0.348736	0.523488	-0.290865
CLK4	0.839937	-0.115802	0.57912	0.226115	-0.937289	2.00001	0.258354	-0.592333	-1.28537	-0.97275
LOC101929124	-0.592606	-0.592606	1.45065	-0.592606	-0.592606	-0.592606	0.716795	-0.592606	-0.592606	1.9808
RASSF8-AS1	0.0666814	-0.494608	0.439033	-0.246858	-0.151196	-1.85033	1.71402	0.871739	-0.97803	0.629546
KIAA0232	0.82893	0.0961218	-0.0360582	-0.853408	-0.467052	-0.364547	1.21892	0.779743	-2.08558	0.882937
RAMP2	-0.880251	0.926949	-0.488885	-0.0235865	-0.583529	-0.950598	0.839794	-1.02622	2.02425	0.162079
TXLNB	1.53107	0.64641	1.04886	0.0216172	0.66667	-1.60506	-0.905301	0.174353	-0.891199	-0.687414
PTPN11	-0.299792	0.430961	-1.74264	-0.580772	1.16344	-0.571033	1.8157	0.214615	-0.558143	0.12767
TRIM65	-0.257341	-0.169842	1.37037	-1.29179	0.0412284	-1.13488	-0.384355	0.0842907	1.96569	-0.223359
LOC644656	0.094787	-0.0798116	0.67306	-1.17304	-1.17304	2.02912	0.35187	0.399918	-1.17304	0.050172
C1ORF61	-0.178937	-0.263592	-0.793652	-0.166727	-0.370802	-0.793652	1.31539	-0.793652	-0.206216	2.25184
NAV2-AS2	-0.354857	0.479521	-0.798371	-0.798371	-0.273481	2.09775	-0.45895	1.35709	-0.451962	-0.798371
UBN2	1.88615	-0.522625	-0.719917	-0.144046	-1.35557	0.74124	0.894266	-0.412157	-0.960272	0.592937
CES5AP1	0.708311	-0.42113	-0.42113	-0.42113	-0.42113	-0.42113	-0.42113	-0.42113	-0.42113	2.66073
PSMC3	0.722376	-0.396055	-0.721375	0.335578	-2.09682	0.996212	1.1764	0.711121	-0.632998	-0.0944314
MIR1249	0.638095	-0.160982	1.03703	-0.36496	-0.716184	-1.43823	-1.43823	1.49798	0.379266	0.566209
OPHN1	0.454688	0.0767959	0.035895	-2.3256	0.0492525	-0.190982	-0.601441	1.38562	0.091741	1.02403
SSH1	-0.44861	0.4241	0.0997912	-0.0445371	0.694207	0.200208	-1.64304	1.06302	1.27584	-1.62099
MIR186	-0.663617	0.227921	-1.01684	0.0731303	-1.26064	1.14184	-0.722582	1.99334	-0.0504841	0.277938
ZMAT1	0.752754	0.0551664	1.01237	-1.92384	-0.105397	0.429104	0.327901	-1.60684	0.169469	0.889307
ASAH2B	-0.078597	-0.475423	-0.215713	0.0184218	0.882251	-1.47471	1.18055	-1.47471	0.164004	1.47392
NEXMIF	-1.16542	-0.474018	-0.0110146	-0.455802	-0.438616	0.276147	1.53447	-0.351445	-0.848754	1.93445
HIST1H2BI	0.366394	0.695575	0.528318	-0.325885	0.0877255	-0.350727	2.10028	-1.36975	-1.06435	-0.667586
CTBP1-AS2	1.80998	0.55564	0.0481709	-0.722773	-1.26603	-1.12753	-0.161281	0.233389	1.24719	-0.616758
DSE	-0.459782	0.948291	0.311731	-0.959144	0.775741	0.293418	0.995729	0.377194	-2.24706	-0.0361154
ACTL8	-0.704228	0.342943	-0.704228	0.534309	-0.704228	-0.704228	1.76445	-0.704228	-0.704228	1.58367
LOXL1-AS1	1.27269	1.23566	-0.448729	-1.04291	-1.21468	1.09763	-0.0507132	-1.05018	0.716432	-0.515202
LRRC43	1.6223	-0.946167	-0.362332	-0.78136	0.675204	-1.42764	0.0061743	-0.671359	1.011	0.874185
TMCO4	1.76725	0.492453	0.585919	-0.731233	0.981354	-0.604845	-1.61817	-0.643587	0.314653	-0.543799
SPANXB1	1.20035	-0.572871	-0.572871	2.2156	-0.572871	-0.572871	-0.572871	0.594152	-0.572871	-0.572871
PPT2-EGFL8	-1.2272	1.39211	0.0914351	1.4594	0.446351	-1.2272	-0.0398691	-0.107547	-1.2272	0.439734
LXN	0.0445502	0.288363	1.59665	-0.771822	-0.283974	0.666314	-1.58094	0.122649	1.1269	-1.20869
TSPAN6	-0.374581	0.550699	-1.21181	-0.455716	-0.382061	-0.359673	1.42059	0.815491	-1.40179	1.39885
CORIN	-0.560974	-0.162569	-0.18094	0.565837	1.12767	-1.78586	0.275298	-0.126673	-0.878479	1.7267
KLHL11	0.0367446	-2.37947	-0.113795	0.423893	0.233683	0.203669	0.781258	1.46148	-0.109062	-0.538396
NRTN	-1.16796	-1.16796	-0.589827	-0.323835	-0.510297	1.04668	1.39557	-0.677067	1.18114	0.813558
LOC103611081	-0.404461	-0.130385	-0.622884	0.234655	-0.356486	1.61565	0.449437	1.51357	-0.64797	-1.65112
DUSP12	0.563043	-0.062931	-0.302239	-0.50445	-0.0536036	-2.02074	1.294	-0.450977	-0.00130648	1.5392
CYP4X1	1.91323	-0.71627	-0.384067	-0.313722	-0.566755	1.08705	0.640205	-1.26906	-0.89567	0.505057
POLR2C	0.66257	-0.0557702	0.153539	-0.127974	-0.62798	-1.17758	1.84316	-0.666989	-1.20456	1.20158
PPCS	0.75347	0.199486	-0.795572	1.65846	0.0631363	-0.0174315	-1.21459	0.895376	0.105894	-1.64822
IGSF9B	0.269932	-0.113955	-0.402517	-0.659845	-0.805651	0.917862	1.30958	-1.84945	0.0345987	1.29944
MLST8	0.53063	-0.178334	0.343277	1.02479	0.381838	-2.01856	-0.204953	-1.42839	0.861886	0.687814
RASSF4	-0.147764	1.67011	1.26531	0.0236803	0.205284	-0.46292	-1.79106	0.514159	-0.490844	-0.785949
TMOD1	1.3673	-0.958287	-0.226007	-0.118725	0.179284	1.24147	-2.09485	0.199453	0.0302007	0.380155
RBM4B	-0.406087	0.232856	-1.39116	-0.740423	0.455805	-0.980962	0.291495	0.192413	0.111593	2.23447
CCDC88B	-0.103279	1.4487	1.71264	-0.240073	0.866864	-0.665407	-1.06027	-0.212895	-0.797855	-0.948437
MUC20	-0.499494	0.548997	1.88644	-1.3111	0.674479	0.251704	-0.496107	-1.04278	0.80622	-0.818353
LOC105373159	1.11097	-1.1958	-1.1958	0.130557	-0.675773	-1.1958	1.22272	0.651208	0.113194	1.03453
MTA2	-0.686224	0.514506	-0.673825	-0.758726	-0.290194	-1.3708	1.83629	1.07678	-0.406107	0.758302
WWOX	0.163308	-0.407694	0.605839	-0.317081	0.0962507	-2.11079	0.0548886	0.899076	-0.620434	1.63663
C9ORF147	-0.716963	-1.39384	0.139643	0.26063	0.556855	-0.787878	-0.537022	2.26246	-0.10924	0.325361
EPOP	-0.825686	-1.28921	0.411607	0.81351	-0.874898	0.555432	1.15069	-1.47003	0.985272	0.543316
ACAD9	0.89395	-1.48221	0.370435	0.0161206	-0.204773	-0.201992	-0.494202	-1.41544	1.68657	0.831543
BISPR	0.197678	1.53764	0.588527	0.927965	-0.560559	0.13546	-1.2158	0.0575913	0.210518	-1.87902
HERC2P10	0.449523	-0.156645	-0.548295	0.216017	-0.210092	-1.30604	1.34057	-1.16881	-0.438508	1.82228
FAM120B	0.0932314	-1.37557	0.637057	-1.60445	0.0360229	1.86565	-0.0792519	0.36193	-0.466116	0.531498
FAM84A	-0.786549	0.180895	0.590895	-0.405734	0.0584343	-0.673397	1.61719	-0.752991	-1.36023	1.53149
PPP6R1	0.940747	0.729189	1.37377	-0.00716055	-0.711783	-1.92598	0.499944	-1.02014	0.362336	-0.240934
LOC440910	-0.471844	-0.471844	-0.471844	-0.471844	-0.471844	-0.471844	2.10478	-0.471844	-0.471844	1.66997
SOCS4	-1.55828	-0.509303	-0.518141	0.250747	0.317186	1.17127	-0.188649	1.74617	0.409723	-1.12072
LRRC71	0.71162	-0.307849	-0.31918	0.458715	-1.21532	-1.21532	0.37364	-0.454408	-0.209619	2.17772
LOC100505715	0.616369	-1.63391	-1.63391	0.661066	-0.536987	1.02566	0.47359	-0.00690359	1.12721	-0.0921857
ZNF714	0.295917	-1.02625	0.0294876	0.189579	0.827027	0.503146	0.532844	0.710793	0.377474	-2.44001
SIX4	-1.60795	-0.898968	0.623942	0.400788	-0.0226354	-1.04299	1.619	-0.187792	-0.0283351	1.14493
UBLCP1	-0.0523895	0.53815	0.101455	0.379334	0.518137	-0.150635	-0.324249	1.94426	-1.39402	-1.56004
ASB9	0.537484	0.304415	0.937375	-0.328574	-0.126507	-0.934711	-1.23238	1.97102	0.0284338	-1.15656
FNIP1	0.600708	-0.0161277	0.326682	0.676465	-0.426404	1.07601	-0.782175	1.4085	-1.57151	-1.29215
CCDC25	-1.26621	-0.591481	-0.0456811	0.75962	-0.0954921	-0.673093	1.07986	1.91186	0.0088321	-1.08821
MSC-AS1	-0.97701	0.24179	0.772032	0.724408	-0.811598	1.6664	0.0632858	0.360238	-1.79982	-0.239721
RNF187	0.913316	0.415283	0.0624902	-0.142166	-1.1252	-1.3953	0.706355	-1.46551	1.16989	0.860842
MUTYH	0.00060818	-0.823298	-1.10133	0.329708	-1.58557	0.729743	1.60354	0.647834	-0.587344	0.786106
LOC100286906	0.179568	-0.053566	-0.616669	-0.616669	-0.616669	-0.616669	2.17199	-0.616669	-0.616669	1.40202
WDPCP	-0.0253276	-1.86523	-1.06558	0.415665	-0.325877	-0.0295085	0.275164	0.029437	0.716375	1.87488
SMG1	-1.00692	0.420879	-0.190604	1.48521	0.389962	1.34621	0.0657698	-1.81094	-0.542044	-0.157528
ARHGEF33	-0.00434539	-0.425782	-0.845795	-0.224702	0.428561	2.64249	-0.0705747	-0.638306	-0.657568	-0.203978
SMIM26	1.26251	1.06239	-0.15787	0.660325	-1.66537	-0.486329	-1.15768	0.127778	1.00994	-0.655699
GSC	-0.334459	-0.195749	-0.990689	0.233742	-0.099182	-0.990689	1.81161	-0.990689	-0.0430089	1.59912
RNLS	0.868458	1.29048	-0.888382	-1.14828	-0.335543	-1.71682	0.376008	0.214418	1.07473	0.26493
FOXM1	-0.328293	-1.91259	-0.853606	-0.346429	0.271848	-0.676515	0.993699	1.10324	0.628802	1.11984
NFASC	1.71576	1.14186	-0.469645	-0.598116	-0.60939	-0.700862	0.437493	-0.706458	-1.24523	1.03459
MYL2	-0.316228	-0.316228	-0.316228	-0.316228	2.84605	-0.316228	-0.316228	-0.316228	-0.316228	-0.316228
CLEC16A	0.383022	-0.524241	0.0256824	2.28327	0.415429	0.181301	-0.919023	-1.26177	-0.817212	0.233543
GSE1	1.44391	0.314227	0.82256	-0.189274	-1.24612	-0.20258	0.762753	-1.5359	-0.966531	0.796951
LINC01579	2.17959	-0.469527	-0.469527	1.57662	-0.469527	-0.469527	-0.469527	-0.469527	-0.469527	-0.469527
REXO5	1.19829	-1.32474	-0.601875	0.0443742	1.59986	-1.56026	0.614402	0.157809	-0.206066	0.0782058
PLEKHA4	-0.9428	0.492178	1.35123	-0.513084	0.513458	0.883818	-1.86621	0.57438	0.386321	-0.879287
CXORF67	1.0734	-0.67869	-0.17281	-0.67869	-0.67869	-0.67869	1.4743	-0.67869	-0.67869	1.69726
CD69	-0.328283	2.0392	0.528749	-0.0602195	0.298493	0.543469	-1.3475	0.223426	-0.501109	-1.39623
PARS2	0.92239	-1.03811	-0.312969	1.7074	-1.20561	-1.14504	0.252148	1.01883	-0.393072	0.194033
ACER2	-0.579284	-0.545843	-1.29946	1.04122	-0.771991	1.95426	0.42806	-0.876171	0.41679	0.232418
CAMP	1.83807	0.942061	-0.977026	0.641611	-0.342401	0.561668	-0.977026	-0.977026	0.267101	-0.977026
PFDN6	-1.0818	-0.165099	0.238305	2.33182	0.842962	-0.539884	0.107183	-0.920111	-0.64891	-0.164464
LOC102724532	-1.0487	-1.0487	1.12431	-1.0487	0.200646	-1.0487	0.652292	1.20465	1.17984	-0.166921
SYNPR	-0.945682	1.31663	-0.549578	-0.607472	-0.813079	-0.945682	0.714587	-0.668839	1.42974	1.06937
QSER1	-0.322466	-0.27167	-1.43483	-0.737771	-1.15693	1.34968	1.65701	0.157335	0.372883	0.386758
C16ORF89	2.02927	-0.403534	0.910184	0.830032	-0.375657	-1.46616	-0.518785	-0.0371781	-0.777269	-0.190902
KIF25	1.54704	-0.449054	0.376858	-0.288141	-0.471129	1.83919	0.0124169	-1.32959	-0.763036	-0.474551
SNRPB2	0.752933	0.446246	-0.651969	-0.0881939	0.586986	-2.5228	0.83936	-0.19385	0.368624	0.462663
LRFN4	-1.24151	-0.803903	-0.638013	-0.757476	1.5063	1.03503	-0.187452	-0.641521	1.38902	0.339537
STX16-NPEPL1	0.876936	-0.0803971	0.308062	0.620362	0.392964	0.715938	-2.56281	-0.128277	-0.562879	0.420104
ZBED5-AS1	0.242377	1.4054	0.687156	-1.01076	0.0587744	0.899871	-0.293872	-0.237057	0.345104	-2.097
SPRR1B	-0.501083	-0.501083	-0.501083	0.0205199	0.981237	2.50583	-0.501083	-0.501083	-0.501083	-0.501083
SH2D1A	-0.19281	1.80554	1.0674	0.425168	0.873588	-1.11034	-1.11034	-0.395691	-0.49547	-0.867051
PIANP	-0.820889	-0.820889	0.595888	1.19746	-0.820889	-0.820889	0.72988	-0.820889	-0.224	1.80522
AKR1C3	-0.170393	-0.501418	-0.713283	-0.71986	1.02458	-0.546089	1.19242	-1.15988	-0.277072	1.871
ZNF273	-0.891016	-0.274064	-0.145834	-0.945344	0.664886	-0.77653	1.39659	0.0333455	-0.905699	1.84366
LINC01748	0.19508	-0.506289	-0.506289	-0.506289	-0.506289	2.55763	0.791311	-0.506289	-0.506289	-0.506289
PCDHGA5	1.01209	-1.08242	1.04887	-0.303716	-1.16696	1.08218	0.234207	-0.672481	-1.20729	1.05553
ABCA7	0.924591	0.308039	0.730516	0.435617	0.885863	-0.0914083	-2.03556	0.133881	0.231231	-1.52277
UBA6-AS1	2.01103	-1.03759	0.317828	-0.517315	1.11341	-0.205449	-1.0704	0.546557	-0.817368	-0.340705
FAM78A	-0.973132	1.9815	0.625426	-0.249197	0.0963433	-0.136214	-1.47821	-0.0165544	0.926182	-0.776142
MCF2L	-1.09371	-1.18197	-0.17529	0.442582	0.39058	1.8017	-0.866715	1.20099	-0.735352	0.217185
MIR99A	-0.0617138	-0.628335	0.0509044	-0.0503547	-0.628335	2.573	-0.628335	-0.628335	-0.628335	0.629836
LINC01347	2.23311	-0.630416	0.492933	-1.12656	-0.342112	0.82982	-0.854221	0.329448	-0.353162	-0.578845
SLC30A7	-0.231067	1.14183	-1.25737	0.736099	-0.619283	-1.46933	1.54907	0.577953	0.062042	-0.489952
ANKRD33	-0.527651	-0.527651	0.837899	-0.527651	-0.527651	-0.527651	-0.527651	-0.527651	0.362081	2.49357
TRPM6	-0.30241	0.307771	-0.158875	-1.44357	1.24898	-0.329644	-0.396907	-0.768616	2.05939	-0.216115
CHGA	0.0167241	0.69271	0.207203	1.20446	-0.941642	-0.941642	-0.208205	-0.941642	1.85368	-0.941642
CSAG1	-0.348111	-0.857354	0.0754379	1.03895	0.885688	-1.13902	1.00289	1.37767	-1.01002	-1.02613
TAS2R20	0.484098	-0.153184	0.100809	-0.50326	-0.172229	-0.100292	0.563049	-1.31562	-1.15313	2.24976
ZFYVE27	-0.651704	0.833349	0.184846	-0.217618	0.167342	-2.49193	0.197052	0.413221	1.03439	0.531047
LAMTOR5	0.708941	0.354418	-0.604239	1.62709	-0.770099	-1.77465	-0.350759	0.789818	0.669211	-0.649727
SNORA81	-0.241823	-0.40702	1.30354	-1.20199	-0.455438	1.45197	0.735006	-1.55337	-0.199429	0.56855
LINC00899	-1.03577	0.277017	-1.03577	-1.03577	-0.293635	0.763591	1.11984	1.38096	-1.03577	0.895315
PURA	-0.0711048	0.502879	1.15008	-0.473911	-0.452833	0.870953	-0.992447	1.67502	-1.07727	-1.13137
IGFBP7	-0.629574	0.356516	1.39296	0.672478	1.39183	0.142619	-1.66671	-0.982503	-0.615952	-0.0616569
LRCH1	-1.0127	-0.313611	2.23055	-0.0193928	0.206009	-0.273675	-0.97553	0.695327	0.507294	-1.04427
TOMM22	-1.39324	-0.886822	0.0694923	-0.273578	-0.286441	-0.490521	1.84071	1.54886	-0.257457	0.128996
TIMM13	1.49329	-0.796345	1.32291	0.806703	-0.687727	-0.445642	-0.040801	-1.22169	0.643886	-1.07458
ACOT13	-1.19996	0.18733	-0.318159	0.86322	0.0196072	-1.17091	0.644735	2.06909	-0.621442	-0.473505
LIX1L-AS1	-0.963238	1.07445	-0.963238	-0.963238	-0.1462	1.71695	1.01149	0.345686	-0.963238	-0.14943
EGF	1.76349	0.858597	0.4537	0.0175203	-0.687114	-1.70286	-0.244532	0.682113	-1.01709	-0.123825
PANK4	0.564003	-0.659091	-0.244971	0.127528	-0.7531	-0.903106	0.30549	2.46908	-0.759951	-0.145876
DHDDS	0.427197	0.630228	-1.29043	1.07377	0.838954	0.345652	-1.99668	-0.196357	0.691882	-0.524216
[truncated: 17,048 more rows]

## Sheet: ChIPseq_diffpeaks
#chr	start	end	strand	annotation	SYMBOL	transcriptId	distanceToTSS	log2FC	baseMean	stat	pvalue	padj
chr9	69305669	69306986	0	Promoter (<=1kb)	BANCR	uc064tpf.1	0	2.69403	150.819	6.1557	7.47474e-10	2.90969e-05
chr20	37856595	37857640	0	Intron (uc061wwf.1/56259, intron 14 of 16)	CTNNBL1	uc061wwl.1	8737	1.99669	52.0645	5.08482	3.67979e-07	0.00574261
chr10	92240223	92241547	0	Promoter (1-2kb)	CPEB3	uc001khv.3	1699	1.46959	101.134	5.04967	4.42567e-07	0.00574261
chr6	32588619	32589761	0	Promoter (<=1kb)	HLA-DRB1	uc063nqy.1	44	1.9244	62.5058	4.92124	8.59975e-07	0.00836906
chr11	89588499	89589321	0	Promoter (<=1kb)	NOX4	uc058gji.1	290	2.12135	66.7288	4.81026	1.50734e-06	0.00977939
chr2	24399371	24399821	0	Distal Intergenic	ITSN2	uc002rfe.3	-38657	2.2726	27.985	4.67729	2.90696e-06	0.0141449
chr19	19378064	19378905	0	Distal Intergenic	GATAD2A	uc060wag.1	-6921	2.00901	45.2248	4.4867	7.23352e-06	0.0238765
chr11	89589410	89589702	0	Promoter (<=1kb)	NOX4	uc058gji.1	0	2.14179	23.7801	4.48299	7.3604e-06	0.0238765
chr7	135980129	135980789	0	Promoter (2-3kb)	LUZP6	uc064iih.1	-2776	1.83392	76.6863	4.38575	1.15588e-05	0.0324266
chr5	76674953	76675716	0	Promoter (<=1kb)	IQGAP2	uc063erx.1	312	1.95805	55.0093	4.32994	1.49151e-05	0.0351488
chr5	57317027	57317962	0	Distal Intergenic	GPBP1	uc063dtw.1	68165	1.69319	60.7081	4.3137	1.60547e-05	0.0351488
chr1	192558149	192559495	0	Intron (uc057oau.1/uc057oau.1, intron 1 of 1)	RGS1	uc001gsi.2	-16232	1.91155	193.954	4.30245	1.68921e-05	0.0351488
chr16	81190097	81191118	0	Promoter (1-2kb)	PKD1L2	uc059xov.1	-1099	1.72607	59.0143	4.27124	1.94388e-05	0.0378348
chr6	27871895	27873937	0	Promoter (<=1kb)	HIST1H3I	uc003njy.4	0	1.24927	222.891	4.22646	2.37391e-05	0.0418694
chr15	86163615	86164346	0	Intron (uc002blz.2/123624, intron 4 of 23)	AGBL1	uc059mvo.1	21604	1.93604	32.9653	4.21717	2.47385e-05	0.0418694
chr4	174521707	174522208	0	Promoter (<=1kb)	HPGD	uc063bbs.1	125	1.81147	83.6514	4.19692	2.70567e-05	0.0438849
chr7	104781216	104781513	0	Intron (uc064gsi.1/375612, intron 2 of 2)	LHFPL3-AS1	uc064gsq.1	22026	1.78226	42.2542	4.15281	3.28424e-05	0.0491714
chr6	31357166	31358397	0	Promoter (<=1kb)	HLA-B	uc003nth.3	0	1.63645	103.442	4.08259	4.45364e-05	0.0611968
chr1	213686146	213686797	0	Distal Intergenic	PROX1-AS1	uc057pic.1	154244	1.70933	41.6738	4.07715	4.55906e-05	0.0611968
chr11	89587516	89587663	0	Promoter (1-2kb)	NOX4	uc058gji.1	1948	1.44212	14.9499	4.06906	4.72028e-05	0.0612487
chr16	31022623	31023310	0	Distal Intergenic	STX4	uc059tjm.1	-9579	1.94606	24.1591	4.04436	5.24665e-05	0.0630314
chr1	204000475	204000971	0	Distal Intergenic	LINC00303	uc001hak.3	40293	1.85099	30.3561	4.04333	5.26973e-05	0.0630314
chr12	9363946	9366105	0	Promoter (1-2kb)	LINC02367	uc058lad.1	-1359	1.60866	182.14	4.02849	5.61356e-05	0.0630314
chr12	28542777	28544135	0	Intron (uc058mha.1/55297, intron 14 of 14)	CCDC91	uc058mhp.1	90235	1.82821	64.8936	4.00581	6.18049e-05	0.0630314
chr1	172745282	172746457	0	Distal Intergenic	FASLG	uc001git.4	86138	1.55289	74.3602	4.00496	6.20285e-05	0.0630314
chr7	95809894	95810998	0	5' UTR	DYNC1I1	uc064fny.1	5610	1.81328	78.2856	3.98626	6.71219e-05	0.0630314
chr1	192557844	192558025	0	Intron (uc057oau.1/uc057oau.1, intron 1 of 1)	RGS1	uc001gsi.2	-17702	1.71738	36.0265	3.97542	7.02544e-05	0.0630314
chr8	116831771	116832318	0	Intron (uc064prj.1/84294, intron 2 of 2)	RAD21	uc064prs.1	17165	1.8841	28.278	3.97489	7.04132e-05	0.0630314
chr1	224578643	224579607	0	Intron (uc057pve.1/uc057pve.1, intron 4 of 5)	CNIH3	uc001hos.2	-36686	1.78404	82.5394	3.96549	7.32461e-05	0.0630314
chr2	242085792	242086905	0	Distal Intergenic	LINC01238	uc061uvh.1	113754	1.62867	68.1579	3.96225	7.42478e-05	0.0630314
chr8	95122790	95124367	0	Distal Intergenic	PLEKHF2	uc003yhn.3	-9437	1.80869	150.861	3.95918	7.5208e-05	0.0630314
chrX	142204625	142205638	0	Promoter (<=1kb)	MAGEC2	uc004fbu.3	0	1.47368	39.1147	3.94803	7.8797e-05	0.0630314
chr15	50884770	50886205	0	Intron (uc001zyw.2/uc001zyw.2, intron 2 of 4)	AP4E1	uc010ufi.3	-22467	1.42426	87.1807	3.94372	8.0228e-05	0.0630314
chr1	170587096	170587846	0	Exon (uc057nfs.1/uc057nfs.1, exon 2 of 2)	GORAB	uc057nfr.1	42456	1.81884	59.5227	3.93772	8.22605e-05	0.0630314
chr8	29748535	29748714	0	Promoter (<=1kb)	LINC02099	uc003xhp.4	185	1.88348	23.2139	3.93723	8.24279e-05	0.0630314
chr6	25373638	25374005	0	Intron (uc031smx.3/55604, intron 2 of 8)	CARMIL1	uc063mfg.1	-91531	1.96463	16.8457	3.93679	8.25802e-05	0.0630314
chr16	35255033	35255928	0	Intron (uc059tsj.1/uc059tsj.1, intron 1 of 1)	LINC01566	uc059tsm.1	-107484	1.48311	22.0001	3.9176	8.94353e-05	0.0664416
chr10	80110269	80111300	0	Distal Intergenic	PLAC9	uc057umr.1	-20382	1.78954	38.4021	3.91334	9.10294e-05	0.0664416
chr9	70868459	70869671	0	Promoter (<=1kb)	TRPM3	uc004ahx.5	0	1.83801	32.5356	3.91033	9.21686e-05	0.0664416
chr20	54131839	54132334	0	Distal Intergenic	CYP24A1	uc061xvd.1	24964	1.83378	22.5646	3.88618	0.000101835	0.069546
chr1	246067916	246068225	0	Intron (uc057qyh.2/64754, intron 5 of 11)	SMYD3	uc057qym.1	28198	1.90711	19.4221	3.87904	0.000104871	0.0703845
chr1	192577845	192578086	0	Promoter (2-3kb)	RGS1	uc057oaz.1	2070	1.80239	43.6881	3.84287	0.000121605	0.0802328
chr11	89589797	89589962	0	Promoter (<=1kb)	NOX4	uc058gji.1	-186	1.8695	12.5666	3.83277	0.000126711	1
chr4	24126394	24126763	0	Distal Intergenic	PPARGC1A	uc062vpw.1	-222305	1.85796	18.5082	3.8262	0.000130136	0.0809539
chr7	104780665	104780836	0	Intron (uc064gsi.1/375612, intron 2 of 2)	LHFPL3-AS1	uc064gsq.1	22703	1.61059	32.0602	3.82609	0.000130197	0.0809539
chr7	129375453	129375968	0	Promoter (<=1kb)	AHCYL2	uc011kox.3	0	1.77562	23.8845	3.82454	0.000131017	0.0809539
chr3	124114920	124115514	0	Intron (uc062nem.1/8997, intron 2 of 5)	MIR5002	uc031sbn.1	-17415	1.64501	28.4436	3.81061	0.000138624	0.0835155
chr10	91632469	91632751	0	Promoter (<=1kb)	PPP1R3C	uc001kho.4	303	1.85801	18.423	3.80914	0.000139454	0.0835155
chr14	71131080	71131770	0	Distal Intergenic	PCNX1	uc059cyb.1	22060	1.37597	46.0338	3.79356	0.000148505	0.0858038
chr20	38358127	38358616	0	Intron (uc002xic.3/3929, intron 5 of 14)	LBP	uc002xic.3	11771	1.86078	18.4637	3.79149	0.000149747	0.0858038
chr8	71359364	71359892	0	Promoter (1-2kb)	EYA1	uc064npp.1	1839	1.59034	41.0475	3.79126	0.000149887	0.0858038
chr7	93980535	93981754	0	Intron (uc064fko.1/uc064fko.1, intron 1 of 3)	BET1	uc064fkn.1	-12145	1.74465	58.8178	3.75717	0.000171846	0.0915243
chr7	73565685	73566485	0	Downstream (2-3kb)	TBL2	uc064efa.1	4909	1.65037	33.6879	3.75407	0.000173987	0.0915243
chr1	41877063	41877333	0	Intron (uc001cgz.5/59269, intron 1 of 8)	HIVEP3	uc057fil.1	-7433	1.7607	15.6986	3.74859	0.000177832	0.0922995
chr4	54385559	54386301	0	Distal Intergenic	PDGFRA	uc062wrb.1	108383	1.75752	29.4247	3.73987	0.000184115	0.0937314
chr16	78443207	78444274	0	Intron (uc002ffk.4/51741, intron 8 of 8)	WWOX	uc059xki.1	18336	1.72788	31.662	3.73406	0.000188417	0.0937314
chr1	247961940	247962808	0	Promoter (2-3kb)	OR2AK2	uc010pzd.3	-2425	1.71644	39.5499	3.73312	0.00018912	0.0937314
chr9	138171016	138171212	0	Distal Intergenic	LOC101928932	uc064xod.1	32113	1.65198	13.5938	3.73283	0.000189337	1
chr4	54386467	54387205	0	Distal Intergenic	PDGFRA	uc062wrb.1	109291	1.75065	31.0986	3.73166	0.000190222	0.0937314
chr11	13337582	13338672	0	Intron (uc057zgd.1/406, intron 2 of 2)	ARNTL	uc057zgn.1	-11273	1.33049	58.5957	3.72452	0.000195684	0.0938423
chr2	165120272	165121436	0	Intron (uc061pde.1/uc061pde.1, intron 3 of 3)	SCN3A	uc061pdl.1	6356	1.73732	41.4632	3.72389	0.000196177	0.0938423
chr16	81188986	81189408	0	Promoter (<=1kb)	PKD1L2	uc059xov.1	0	1.69621	21.5994	3.71931	0.000199768	0.0938423
chr1	89407525	89408668	0	Distal Intergenic	GBP6	uc001dnf.3	43467	1.6468	73.079	3.7189	0.00020009	0.0938423
chr12	39619085	39619366	0	Promoter (<=1kb)	ABCD2	uc001rmb.3	385	1.75889	17.1017	3.71203	0.000205605	0.094348
chr1	170592117	170592263	0	Distal Intergenic	GORAB	uc057nfr.1	47477	1.50853	7.93608	3.70932	0.000207816	1
chr6	26273145	26274284	0	Promoter (<=1kb)	HIST1H2BI	uc003nhk.4	169	1.54196	115.815	3.70007	0.000215544	0.094348
chr4	24127237	24127942	0	Distal Intergenic	PPARGC1A	uc062vpw.1	-223148	1.67483	35.0318	3.69658	0.000218525	0.094348
chr7	134635446	134636394	0	Distal Intergenic	BPGM	uc003vrw.4	-10414	1.57014	56.5611	3.69449	0.000220331	0.094348
chr1	197138683	197139607	0	Intron (uc001gtu.4/259266, intron 4 of 27)	ASPM	uc057odd.1	-3539	1.58475	71.5521	3.69423	0.000220558	0.094348
chr1	226330260	226331054	0	Distal Intergenic	LIN9	uc057pyh.1	-20391	1.54499	24.5215	3.67533	0.000237539	0.0967284
chr20	19943309	19943909	0	Intron (uc002wro.3/54453, intron 3 of 11)	RIN2	uc061vrx.1	8184	1.67894	56.1869	3.66974	0.000242793	0.0967284
chr5	9431087	9432536	0	Intron (uc003jek.3/9037, intron 2 of 22)	SEMA5A	uc063cgc.1	-50886	1.49677	60.4225	3.66492	0.000247418	0.0967284
chr20	38356813	38357705	0	Intron (uc002xic.3/3929, intron 5 of 14)	LBP	uc002xic.3	10457	1.70922	39.3929	3.66197	0.000250285	0.0967284
chr7	94313950	94315169	0	Distal Intergenic	COL1A2	uc003ung.1	-79392	1.64149	97.8436	3.65901	0.000253188	0.0967284
chr2	24400158	24400400	0	Distal Intergenic	ITSN2	uc002rfe.3	-39444	1.89519	11.2944	3.6584	0.000253794	1
chr1	192577413	192577714	0	Promoter (1-2kb)	RGS1	uc057oaz.1	1638	1.70425	51.3897	3.65733	0.000254858	0.0967284
chr1	192528715	192528933	0	Intron (uc057oau.1/uc057oau.1, intron 1 of 1)	RGS1	uc001gsi.2	-46794	1.68988	27.652	3.65467	0.000257513	0.0967284
chr3	109244336	109245300	0	Distal Intergenic	LINC00488	uc003dxn.6	66171	1.4315	43.6735	3.65425	0.000257933	0.0967284
chr5	175573459	175573794	0	Distal Intergenic	SFXN1	uc063jvm.1	51573	1.82466	15.2405	3.65161	0.000260597	0.0967284
chr8	116830773	116831350	0	Intron (uc064prj.1/84294, intron 2 of 2)	RAD21	uc064prs.1	18133	1.69971	35.2933	3.65131	0.000260911	0.0967284
chr9	138171844	138172410	0	Distal Intergenic	LOC101928932	uc064xod.1	30915	1.67914	34.7591	3.64307	0.000269411	0.0989372
chr17	79852375	79853472	0	Distal Intergenic	CBX4	uc002jxe.4	-12946	1.37888	78.8701	3.63481	0.000278184	0.101204
chr1	235047621	235048977	0	Distal Intergenic	TOMM20	uc057qmx.1	70922	1.28938	87.6224	3.62986	0.000283575	0.102211
chr9	33100191	33100683	0	Distal Intergenic	SMU1	uc003zsf.2	-23532	1.81903	14.6143	3.62925	0.000284244	1
chr1	192578188	192578371	0	Promoter (2-3kb)	RGS1	uc057oaz.1	2413	1.70558	32.243	3.62498	0.000288986	0.102267
chr5	149932155	149932301	0	Intron (uc063ipf.1/5145, intron 1 of 20)	PDE6A	uc063ipf.1	12492	1.46627	7.56188	3.62399	0.000290095	1
chr12	9866849	9867289	0	Promoter (2-3kb)	CLEC2B	uc058lbc.1	2065	1.4996	66.9926	3.6167	0.000298378	0.103705
chr4	92090560	92091511	0	Distal Intergenic	LNCPRESS2	uc062yfx.1	185564	1.65369	42.3875	3.61078	0.00030528	0.104242
chr4	108830347	108830648	0	Promoter (2-3kb)	COL25A1	uc062yyi.1	2044	1.82465	11.7901	3.61065	0.000305426	1
chr9	69305336	69305493	0	Promoter (<=1kb)	BANCR	uc064tpg.1	802	1.78867	15.0198	3.6056	0.000311427	0.104546
chr14	94110791	94111530	0	Promoter (<=1kb)	IFI27	uc059erq.1	0	1.6328	45.7786	3.60551	0.000311542	0.104546
chr11	89590983	89591242	0	Promoter (1-2kb)	NOX4	uc058gji.1	-1372	1.80623	9.33236	3.60498	0.000312179	1
chr1	192559842	192560262	0	Intron (uc057oau.1/uc057oau.1, intron 1 of 1)	RGS1	uc001gsi.2	-15465	1.67775	59.3738	3.60185	0.000315965	0.105124
chr1	209806330	209806825	0	Promoter (<=1kb)	IRF6	uc010psm.2	-155	1.61707	26.348	3.59599	0.000323157	0.105427
chr8	93000978	93001393	0	Intron (uc064omt.1/286144, intron 1 of 4)	TRIQK	uc064omt.1	16280	1.46335	34.1953	3.59451	0.000324999	0.105427
chrX	131817080	131817668	0	Intron (uc004ewi.3/286467, intron 2 of 12)	FIRRE	uc004ewi.3	12975	1.42841	44.1514	3.58535	0.000336621	0.107651
chr4	70613383	70614641	0	Distal Intergenic	ENAM	uc011caw.2	-14103	1.65798	46.4008	3.58476	0.000337386	0.107651
chr16	31242458	31243323	0	Distal Intergenic	ITGAM	uc002ebq.4	-16667	1.58021	68.6862	3.57657	0.000348138	0.109667
chr1	89021628	89022984	0	Promoter (<=1kb)	GBP3	uc001dmt.4	0	1.12757	168.208	3.57359	0.000352125	0.109667
chr10	75294386	75296483	0	Promoter (<=1kb)	ZNF503-AS1	uc021pts.2	0	1.40163	129.395	3.573	0.000352918	0.109667
chr14	91021986	91023323	0	Intron (uc001xys.4/9252, intron 1 of 16)	DGLUCY	uc059eic.1	-37010	1.40493	56.3892	3.5695	0.000357663	0.109667
chr6	32609331	32609897	0	Distal Intergenic	HLA-DRB1	uc003obp.5	-19483	1.51865	39.5222	3.56909	0.00035822	0.109667
chr6	32665679	32666728	0	Promoter (<=1kb)	HLA-DQB1	uc063nre.1	0	1.47156	57.577	3.56735	0.000360609	0.109667
chr1	192555578	192555948	0	Intron (uc057oau.1/uc057oau.1, intron 1 of 1)	RGS1	uc001gsi.2	-19779	1.48745	52.7355	3.55582	0.000376799	0.111619
chr10	91630793	91631229	0	Promoter (1-2kb)	PPP1R3C	uc001kho.4	1825	1.65769	18.1418	3.55243	0.000381693	0.111619
chr7	135982023	135982475	0	Distal Intergenic	LUZP6	uc064iih.1	-4670	1.57794	38.2589	3.54844	0.000387525	0.111619
chrX	115727881	115728084	0	Distal Intergenic	PLS3	uc065aut.1	87577	1.47464	6.47909	3.54326	0.000395219	1
chr1	5917977	5918293	0	Intron (uc057bsd.1/261734, intron 9 of 25)	NPHP4	uc057bsk.1	-12653	1.65673	24.2262	3.54078	0.000398941	0.111619
chr12	40107965	40108290	0	Promoter (1-2kb)	SLC2A13	uc001rmf.4	-1876	1.66728	21.202	3.53853	0.000402369	0.111619
chr10	26487062	26487319	0	Intron (uc001iss.4/54518, intron 2 of 14)	APBB1IP	uc001isr.4	48637	1.92484	10.2891	3.53586	0.000406456	1
chr4	174522750	174523869	0	Promoter (<=1kb)	HPGD	uc003itu.3	0	1.59046	186.114	3.53425	0.000408941	0.111619
chr9	138171324	138171754	0	Distal Intergenic	LOC101928932	uc064xod.1	31571	1.53371	23.7429	3.53395	0.000409402	0.111619
chr1	185340002	185340463	0	Distal Intergenic	GS1-279B7.1	uc057nye.1	-4963	1.36144	71.9099	3.53367	0.000409825	0.111619
chr11	105044521	105045691	0	Promoter (<=1kb)	CARD16	uc001pip.2	0	1.34055	81.8978	3.53354	0.000410038	0.111619
chr2	121969781	121970077	0	Distal Intergenic	TSN	uc061nmk.1	213610	1.60346	27.8394	3.52977	0.000415922	0.112435
chr7	141558188	141558645	0	Promoter (2-3kb)	AGK	uc064iqr.1	2722	1.74675	12.4644	3.52919	0.000416828	1
chr15	101470626	101471193	0	Intron (uc032csi.2/5046, intron 1 of 21)	PCSK6	uc059nzm.1	18242	1.71956	19.1801	3.52333	0.000426159	0.113624
chr7	74921878	74922480	0	Distal Intergenic	CASTOR2	uc003ucg.4	-42338	1.67936	18.9897	3.51815	0.000434564	0.115077
chr11	1704574	1704935	0	Distal Intergenic	KRTAP5-6	uc001lua.3	7379	1.79427	11.8004	3.51784	0.000435072	1
chr16	75559154	75560231	0	Promoter (2-3kb)	TMEM231	uc002fem.5	-2868	1.36763	89.1553	3.5112	0.000446089	0.11708
chr13	77975614	77976185	0	Intron (uc001vks.3/100874222, intron 1 of 2)	LINC01069	uc058xqa.1	14461	1.4004	65.1832	3.50601	0.000454882	0.11708
chr1	187072406	187073373	0	Distal Intergenic	LINC01036	uc057nzs.1	-19469	1.64283	31.8738	3.50594	0.000454998	0.11708
chr20	53610762	53611066	0	Promoter (2-3kb)	LOC105372672	uc061xuw.1	2408	1.51362	24.2562	3.50289	0.000460239	0.11708
chr1	187641281	187642637	0	Exon (uc001gsd.4/uc001gsd.4, exon 2 of 3)	LINC01037	uc057nzu.1	197653	1.62361	84.0958	3.50287	0.000460271	0.11708
chr6	159717055	159717371	0	Intron (uc063soy.1/uc063soy.1, intron 3 of 7)	WTAP	uc003qsl.6	-8214	1.65479	17.7274	3.50054	0.000464322	0.11708
chr6	32637443	32638220	0	Promoter (<=1kb)	HLA-DQA1	uc063nrd.1	12	1.54315	41.5086	3.49984	0.000465544	0.11708
chr14	93976237	93977261	0	Promoter (<=1kb)	ASB2	uc001ycd.4	0	1.22519	75.7595	3.49947	0.00046619	0.11708
chr15	101086592	101087321	0	Distal Intergenic	LRRK1	uc059nxu.1	22176	1.57479	31.8193	3.49568	0.000472854	0.117436
chr7	79531467	79532096	0	Distal Intergenic	MAGI2-AS3	uc064etz.1	61040	1.64628	32.9112	3.49524	0.000473642	0.117436
chr8	103185540	103186700	0	Intron (uc003yld.4/79870, intron 1 of 2)	BAALC-AS1	uc064phz.1	-13400	1.6165	108.089	3.48994	0.000483125	0.117853
chr7	150405382	150407137	0	Promoter (<=1kb)	LOC728743	uc064jdo.2	0	1.25241	186.696	3.48923	0.000484406	0.117853
chr16	11303300	11304087	0	Promoter (2-3kb)	MIR548H2	uc032drk.1	2440	1.66994	19.7087	3.48745	0.000487646	0.117904
chr5	42992790	42993301	0	Distal Intergenic	LOC648987	uc003jnd.4	25423	1.28552	66.5364	3.48351	0.000494892	0.118918
chr10	74894541	74895043	0	Intron (uc057uff.1/23522, intron 2 of 16)	KAT6B	uc057ufi.1	55841	1.69656	17.4806	3.47622	0.000508528	0.11987
chr15	57431529	57431675	0	Intron (uc059jpm.1/84952, intron 2 of 2)	CGNL1	uc002aeg.3	55024	1.4112	6.43838	3.47592	0.000509107	1
chr7	103155283	103156048	0	Distal Intergenic	NAPEPLD	uc064gqq.1	-5723	1.4724	40.7882	3.47582	0.000509302	0.11987
chr6	130260724	130261552	0	Intron (uc003qbx.5/154075, intron 2 of 13)	SAMD3	uc063rig.1	24693	1.62573	28.0621	3.47217	0.000516264	0.11987
chr6	155505153	155506372	0	Distal Intergenic	NOX3	uc003qqm.4	-49250	1.43725	64.8308	3.46295	0.000534278	0.122009
chr2	221641828	221642528	0	Distal Intergenic	EPHA4	uc032otk.2	-67626	1.60425	24.7111	3.45754	0.000545135	0.122009
chr15	52418030	52418300	0	Intron (uc002aby.4/4644, intron 4 of 40)	MYO5A	uc059jjb.1	7667	1.70704	14.8577	3.45652	0.000547201	0.122009
chr1	246067258	246067854	0	Intron (uc057qyh.2/64754, intron 5 of 11)	SMYD3	uc057qym.1	28569	1.61095	46.0328	3.4528	0.000554798	0.122708
chr1	159075678	159077240	0	Promoter (<=1kb)	AIM2	uc001ftj.2	0	1.54189	136.553	3.4455	0.000570003	0.125359
chr1	204001094	204001686	0	Distal Intergenic	LINC00303	uc001hak.3	39578	1.60899	33.2254	3.4423	0.000576791	0.125901
chr16	27253027	27254435	0	Intron (uc002doi.2/197370, intron 2 of 7)	NSMCE1	uc059sjc.1	3716	1.36521	102.002	3.43829	0.000585406	0.125901
chr4	123422416	123422576	0	Distal Intergenic	SPRY1	uc062zkx.1	22448	1.75194	7.47064	3.43504	0.000592467	1
chr20	38092410	38093095	0	Intron (uc061www.1/58490, intron 2 of 2)	RPRD1B	uc061wxa.1	7034	1.27547	70.7373	3.43138	0.000600512	0.12844
chr6	32604718	32605130	0	Distal Intergenic	HLA-DRB1	uc003obp.5	-14870	1.63882	18.2768	3.42562	0.000613402	0.13048
chr5	175613791	175614506	0	Distal Intergenic	HRH2	uc003mdc.5	-43524	1.60273	48.3583	3.42388	0.000617347	0.130606
chr6	134314242	134314419	0	Intron (uc003qeo.4/6446, intron 1 of 13)	SGK1	uc003qep.4	3210	1.11547	18.0249	3.41969	0.000626928	0.131916
chr1	224543177	224543915	0	Intron (uc057pve.1/uc057pve.1, intron 2 of 5)	CNIH3	uc001hos.2	-72378	1.57777	87.8965	3.41709	0.000632936	0.132272
chr13	77824338	77824877	0	Distal Intergenic	EDNRB-AS1	uc058xpw.1	-3345	1.31986	30.2706	3.40919	0.000651569	0.134199
chr9	83266482	83267014	0	Promoter (<=1kb)	FRMD3	uc004amq.1	273	1.60332	23.3319	3.40119	0.000670938	0.136741
chr19	11581425	11581600	0	Promoter (2-3kb)	ACP5	uc002msj.5	-2439	1.71354	11.1746	3.39313	0.000690996	1
chr1	192602921	192603445	0	Distal Intergenic	RGS1	uc057oaz.1	27146	1.55524	53.0301	3.39155	0.000694994	0.140906
chr2	70907436	70908020	0	Intron (uc002shh.4/25806, intron 1 of 2)	VAX2	uc002shh.4	6846	1.56866	19.8956	3.38973	0.000699607	0.141107
chr11	62428454	62428988	0	Distal Intergenic	SCGB1A1	uc001ntj.4	9419	1.54982	36.4282	3.3792	0.000726977	0.145123
chr15	62119115	62119496	0	Distal Intergenic	C2CD4B	uc002ahg.3	45787	1.59665	22.8525	3.37575	0.000736139	0.146203
chr5	124866853	124867195	0	Distal Intergenic	ZNF608	uc063gml.1	-118046	1.62639	18.7267	3.37316	0.000743094	0.146835
chr1	192578549	192578741	0	Promoter (2-3kb)	RGS1	uc057oaz.1	2774	1.60122	31.6585	3.36611	0.000762371	0.149883
chr6	53236023	53236583	0	Distal Intergenic	MIR5685	uc031sow.1	-40410	1.58617	25.6004	3.36389	0.00076851	0.149919
chr11	115942044	115942410	0	Intron (uc058hqb.1/uc058hqb.1, intron 3 of 3)	LINC00900	uc009yzb.3	-181417	1.59695	15.2382	3.36206	0.000773628	0.149919
chr12	10317472	10318335	0	3' UTR	KLRD1	uc058ldj.1	3978	1.48858	18.2225	3.36013	0.000779065	0.149919
chr4	23890230	23891011	0	Promoter (<=1kb)	PPARGC1A	uc062vpn.1	-153	1.55612	89.2382	3.35951	0.000780816	0.149919
chr17	70343834	70345011	0	Intron (uc060jiz.1/uc060jiz.1, intron 1 of 2)	KCNJ2	uc002jir.4	174299	1.47098	39.2761	3.35551	0.0007922	0.149919
chr7	149321772	149322317	0	Distal Intergenic	LOC155060	uc064jah.1	43634	1.59416	18.9856	3.35239	0.000801163	0.149919
chr8	89805159	89805313	0	Distal Intergenic	RIPK2	uc064ohq.1	25071	1.46184	4.79171	3.34971	0.000808948	1
chr1	192553781	192553938	0	Intron (uc057oau.1/uc057oau.1, intron 1 of 1)	RGS1	uc001gsi.2	-21789	1.37691	22.6079	3.34962	0.000809225	0.149919
chr18	43932728	43933461	0	Distal Intergenic	LINC01478	uc060osc.1	598194	1.57336	33.362	3.34916	0.000810571	0.149919
chr4	56530559	56531475	0	Promoter (<=1kb)	THEGL	uc031seh.2	0	1.58421	33.1859	3.34621	0.000819231	0.150426
chr12	9134660	9135795	0	Distal Intergenic	A2M	uc058kzv.1	-18431	1.55779	63.4884	3.34389	0.000826119	0.150951
chr4	119038505	119038877	0	3' UTR	SYNPO2	uc062zgb.1	15034	1.55307	20.46	3.34247	0.000830358	0.150951
chr11	117173419	117173879	0	Intron (uc021qqv.2/5049, intron 5 of 5)	SIDT2	uc001pqh.2	-4854	1.39382	26.3968	3.34077	0.000835452	0.150951
chr7	116511328	116512844	0	Distal Intergenic	CAV2	uc064hgz.1	11284	1.36648	190.21	3.34006	0.000837603	0.150951
chr11	109984648	109985585	0	Distal Intergenic	ZC3H12C	uc009yxw.3	-107776	1.45358	43.9986	3.33864	0.000841898	0.151026
chrX	43869263	43869514	0	Intron (uc004dfz.5/4129, intron 1 of 14)	MAOB	uc064yrn.1	12789	1.5802	8.16612	3.33317	0.000858616	1
chr1	200150723	200151462	0	Intron (uc001gvb.5/2494, intron 7 of 7)	NR5A2	uc057ofg.1	106913	1.33512	35.8928	3.33314	0.000858705	0.152201
chr21	42527666	42528623	0	Intron (uc002zbi.3/54020, intron 4 of 20)	SLC37A1	uc062alk.1	13142	1.38175	47.4769	3.33267	0.000860181	0.152201
chr1	192529166	192531194	0	Exon (uc057oav.1/uc057oav.1, exon 1 of 3)	RGS1	uc001gsi.2	-44533	1.48248	261.406	3.32299	0.000890596	0.156666
chr1	192576700	192576896	0	Promoter (<=1kb)	RGS1	uc057oaz.1	925	1.48748	28.0182	3.32111	0.000896614	0.156666
chr16	22684746	22685054	0	Distal Intergenic	HS3ST2	uc002dli.4	-129123	1.44941	20.1572	3.31836	0.00090549	0.156666
chr4	85659761	85660971	0	Intron (uc003hpk.4/83478, intron 2 of 9)	ARHGAP24	uc062xxx.1	55608	1.10748	74.469	3.318	0.000906656	0.156666
chr4	109046519	109047083	0	Intron (uc062yyb.1/84570, intron 1 of 34)	COL25A1	uc062yyb.1	3099	1.5818	18.4013	3.31745	0.000908418	0.156666
chr1	192579160	192579692	0	3' UTR	RGS1	uc057oaz.1	3385	1.54467	90.7686	3.31625	0.000912327	0.156666
chrX	134147978	134148397	0	Distal Intergenic	MIR363	uc022ceb.2	21076	1.51723	14.9583	3.31557	0.00091458	0.156666
chr4	56700669	56701146	0	Distal Intergenic	HOPX	uc003hcb.3	-18770	1.54251	45.8386	3.31464	0.000917611	0.156666
chr8	119991154	119991632	0	Intron (uc011lid.4/64798, intron 2 of 6)	DEPTOR	uc064pul.1	21366	1.54455	48.5886	3.31328	0.000922096	0.156744
chr8	134747110	134747341	0	Distal Intergenic	ZFAT	uc064qmk.1	-34061	1.59565	11.9991	3.31327	0.000922133	1
chr1	212488890	212489329	0	Distal Intergenic	NENF	uc057pfs.1	55899	1.52125	18.8377	3.30713	0.000942559	0.158835
chr8	103184253	103184462	0	Intron (uc003yld.4/79870, intron 1 of 2)	BAALC-AS1	uc064phz.1	-12113	1.56393	27.3701	3.29991	0.000967161	0.162279
chr7	90463109	90464182	0	Promoter (2-3kb)	CDK14	uc064ffg.1	-2242	1.49088	57.0394	3.29633	0.000979568	0.163655
chr1	231508564	231509286	0	Distal Intergenic	TSNAX-DISC1	uc010pwg.2	-19367	1.54524	38.8947	3.29038	0.00100053	0.166213
chr1	192576272	192576555	0	Promoter (<=1kb)	RGS1	uc057oaz.1	497	1.53191	28.8045	3.28874	0.00100637	0.166213
chr11	123068791	123069266	0	Downstream (<1kb)	HSPA8	uc058ipd.1	-5561	1.48654	28.7834	3.28718	0.00101196	0.166213
chr15	78223893	78224282	0	Intron (uc002bdh.4/23205, intron 1 of 13)	ACSBG1	uc059mcc.1	10243	1.64761	12.2456	3.28625	0.00101531	1
chr8	71361467	71362231	0	Promoter (<=1kb)	EYA1	uc064npp.1	0	1.4825	65.0915	3.27858	0.00104332	0.169222
chr11	105034377	105035604	0	Promoter (<=1kb)	CASP1	uc001pig.5	0	1.31729	106.246	3.27739	0.0010477	0.169228
chr1	192552856	192553040	0	Intron (uc057oau.1/uc057oau.1, intron 1 of 1)	RGS1	uc001gsi.2	-22687	1.48679	26.3071	3.26338	0.00110092	0.176201
chr1	151720080	151721423	0	Promoter (<=1kb)	RIIAD1	uc010pdj.2	-114	1.32069	68.0225	3.26253	0.00110424	0.176201
chr1	150809165	150809628	0	Promoter (<=1kb)	CTSK	uc001evp.3	-842	1.4302	36.5998	3.26239	0.00110477	0.176201
chr7	130278302	130278735	0	Intron (uc003vpq.4/1358, intron 8 of 10)	CPA2	uc064hyv.1	11421	1.47839	37.6376	3.25869	0.0011193	0.177118
chr2	231541317	231541491	0	Distal Intergenic	NMUR1	uc002vry.5	-10822	1.15766	6.96428	3.25777	0.00112292	1
chr11	34044817	34045795	0	Distal Intergenic	CAPRIN1	uc001mvh.2	-5888	1.44511	49.1242	3.25678	0.00112682	0.177586
chr7	93591699	93592654	0	Promoter (<=1kb)	GNGT1	uc064fkd.1	126	1.24915	40.7521	3.25442	0.00113625	0.17835
chr6	95739785	95740525	0	Distal Intergenic	MANEA	uc063qdt.1	151563	1.1832	12.5382	3.25186	0.00114652	1
chr4	77618871	77619478	0	Distal Intergenic	CXCL13	uc062xoa.1	13039	1.54586	26.9653	3.24976	0.00115501	0.180567
chr6	147117356	147118045	0	Promoter (1-2kb)	STXBP5-AS1	uc063scp.1	1418	1.54006	18.0774	3.24571	0.00117159	0.182033
chr20	16764884	16765364	0	Intron (uc061vnp.1/uc061vnp.1, intron 2 of 2)	OTOR	uc061vno.1	15524	1.11496	14.1086	3.24393	0.00117891	1
chr7	106658556	106660401	0	Promoter (<=1kb)	CCDC71L	uc003vdt.4	595	1.22468	248.15	3.24221	0.00118605	0.182033
chr16	56546885	56547323	0	Distal Intergenic	MT4	uc002eje.1	-17726	1.3412	28.1884	3.24204	0.00118676	0.182033
chr1	182302029	182302945	0	Intron (uc031vgr.2/400799, intron 2 of 2)	LINC01344	uc031vgr.2	11116	1.20527	64.1454	3.24021	0.0011944	0.182033
chr9	16884426	16884786	0	Distal Intergenic	BNC2	uc064sgh.1	-13583	1.60825	10.4518	3.23922	0.00119859	1
chr5	8830696	8830918	0	Distal Intergenic	LINC02199	uc032ulo.2	-8814	1.43521	31.558	3.23914	0.00119892	0.182033
chr16	19831317	19831784	0	Intron (uc002dgs.4/124152, intron 7 of 7)	IQCK	uc059rox.1	4253	1.4743	18.5526	3.23589	0.00121265	0.182033
chr11	117172544	117172803	0	Intron (uc021qqv.2/5049, intron 5 of 5)	SIDT2	uc001pqh.2	-5930	1.50963	15.2482	3.23323	0.00122398	0.182033
chr7	134898584	134899088	0	Intron (uc064ifh.1/800, intron 3 of 13)	CALD1	uc064ift.1	6974	1.51929	26.4473	3.23295	0.00122518	0.182033
chr16	81189533	81190043	0	Promoter (<=1kb)	PKD1L2	uc059xov.1	-535	1.41863	36.2304	3.23163	0.00123088	0.182185
chr4	76028445	76028968	0	Intron (uc062xkr.1/419, intron 1 of 3)	CXCL10	uc003hjl.5	-4948	1.48313	24.2442	3.22923	0.00124124	0.182597
chrX	93696090	93696500	0	Intron (uc022bzw.1/286499, intron 2 of 2)	FAM133A	uc004efr.3	21884	0.943438	9.57312	3.22534	0.00125821	1
chr8	125701552	125701936	0	Distal Intergenic	LINC00861	uc064qcm.1	249214	1.54083	23.0083	3.2122	0.00131723	0.187923
chr2	105605513	105605904	0	Distal Intergenic	NCK2	uc002tdg.4	-138993	1.38452	56.8669	3.21205	0.00131793	0.187923
chr5	37840487	37840838	0	Promoter (<=1kb)	GDNF-AS1	uc021xxo.2	49	1.40513	15.5636	3.2117	0.00131951	0.187923
chr7	70777083	70777633	0	Promoter (<=1kb)	AUTS2	uc064ecr.1	409	1.50041	29.4182	3.20931	0.00133052	0.187923
chr8	29749556	29750122	0	Promoter (1-2kb)	LINC02099	uc003xhp.4	1206	1.43639	82.2058	3.20806	0.00133633	0.187923
chr16	11312142	11312540	0	Intron (uc059qup.1/uc059qup.1, intron 1 of 1)	MIR548H2	uc032drk.1	-5615	1.52854	17.1162	3.20752	0.00133884	0.187923
chr14	81946752	81947706	0	Intron (uc059dyv.1/uc059dyv.1, intron 3 of 3)	LINC01467	uc001xvp.3	-323691	1.51205	30.5832	3.20748	0.00133906	0.187923
chrX	102659450	102659906	0	Exon (uc065ajx.1/uc065ajx.1, exon 1 of 3)	GPRASP1	uc065ajz.1	6604	1.54323	16.8545	3.20637	0.0013442	0.187923
chr2	157192242	157192720	0	Distal Intergenic	GALNT5	uc002tzg.4	-64878	1.49843	33.104	3.20477	0.00135172	0.187923
chr1	235887831	235888446	0	Distal Intergenic	LYST	uc057qop.1	-4191	1.36583	82.4906	3.20152	0.00136706	0.189326
chr1	27689255	27689675	0	Intron (uc057dwe.1/uc057dwe.1, intron 2 of 2)	IFI6	uc001boo.2	-17037	1.51004	12.7306	3.19881	0.00137997	1
chr1	192598923	192599124	0	Distal Intergenic	RGS1	uc057oaz.1	23148	1.3292	20.1904	3.19812	0.00138327	0.189326
chr12	126771602	126772380	0	Promoter (<=1kb)	LINC00944	uc058vau.1	0	1.42272	40.5355	3.19765	0.00138553	0.189326
chr20	55216996	55217396	0	Distal Intergenic	LINC01440	uc061xvo.1	-191502	1.22805	5.64784	3.19619	0.00139257	1
chr10	69087292	69087935	0	Promoter (<=1kb)	SRGN	uc057tso.1	-171	1.1193	87.0991	3.19611	0.00139292	0.189326
chr16	56780912	56782793	0	Promoter (<=1kb)	NUP93	uc002ekb.4	0	1.48536	120.553	3.1945	0.00140072	0.189326
chr2	225040873	225042080	0	Promoter (<=1kb)	DOCK10	uc061tdy.1	304	1.27227	76.2329	3.19027	0.00142142	0.191459
chr15	41429158	41429898	0	Intron (uc059hyi.1/23168, intron 1 of 2)	RTF1	uc059hyj.1	12026	1.42831	30.0714	3.18844	0.00143041	0.192005
chr2	29115785	29117251	0	Promoter (<=1kb)	CLIP4	uc002rmv.4	359	1.10793	125.454	3.1843	0.00145107	0.194109
chr16	25048335	25049385	0	Distal Intergenic	LINC02175	uc021tfn.2	-17552	1.13078	79.1709	3.18272	0.00145898	0.194425
chr2	39020483	39020649	0	Intron (uc061ikm.1/6654, intron 11 of 23)	SOS1	uc061ikt.1	3174	1.37739	22.6776	3.18184	0.00146342	0.194425
chr1	212579534	212580497	0	Intron (uc057pfw.1/467, intron 1 of 3)	ATF3	uc001hjf.4	14200	1.3655	26.644	3.17928	0.00147643	0.195486
chr5	76676624	76676854	0	Promoter (<=1kb)	IQGAP2	uc063ery.1	-300	1.47142	18.3021	3.17607	0.00149284	0.196989
chr18	11454505	11454789	0	Exon (uc060njz.1/uc060njz.1, exon 1 of 4)	LINC01255	uc060nka.1	-33781	1.57848	6.14763	3.17303	0.00150858	1
chr7	99997248	99998201	0	Distal Intergenic	ZKSCAN1	uc003usm.3	-17371	1.40356	44.3032	3.17194	0.00151422	0.199135
chr12	12749567	12750364	0	Intron (uc058lja.1/81575, intron 2 of 3)	MIR613	uc021qvl.1	-14285	1.46922	31.4624	3.16731	0.00153857	0.199931
chr7	95628049	95628918	0	Distal Intergenic	PDK4	uc003uoa.4	-31558	1.49809	42.8589	3.16688	0.00154082	0.199931
chr9	33510720	33511282	0	Distal Intergenic	ANKRD18B	uc064spz.1	-13112	1.47914	21.583	3.16321	0.0015604	0.201616
chr21	17794801	17795047	0	Promoter (2-3kb)	C21orf91-OT1	uc061zej.1	-2278	1.42365	18.1141	3.16226	0.0015655	0.201616
chr11	11611322	11611493	0	Intron (uc001mjo.3/374378, intron 1 of 10)	GALNT18	uc057zcw.1	10265	1.14037	6.19962	3.16203	0.00156675	1
chr20	39622935	39623092	0	Distal Intergenic	LINC01370	uc032pjw.2	-381385	1.20712	5.3564	3.16055	0.00157472	1
chr20	39358386	39359806	0	Distal Intergenic	LINC01734	uc010zwd.2	-133638	1.45152	126.855	3.15242	0.00161923	0.205601
chr10	91199086	91199695	0	Intron (uc001khh.5/84333, intron 1 of 9)	PCGF5	uc010qnk.4	-20456	1.4816	29.2087	3.15159	0.00162383	0.205601
chr4	56701243	56702447	0	Distal Intergenic	HOPX	uc003hcb.3	-19344	1.42806	133.075	3.15106	0.00162676	0.205601
chr10	92283878	92284097	0	Intron (uc001khw.3/22849, intron 1 of 9)	CPEB3	uc001khw.3	6990	1.62943	9.14633	3.14908	0.00163787	1
chr1	159075413	159075581	0	Promoter (1-2kb)	AIM2	uc057mgp.1	1274	1.56988	10.2908	3.14907	0.00163791	1
chr4	159269628	159269863	0	Promoter (1-2kb)	RAPGEF2	uc003iqg.5	1891	1.50639	17.6247	3.14716	0.00164865	0.207693
chr1	145675874	145676042	0	Promoter (2-3kb)	PDZK1	uc057kam.1	-2118	1.14051	5.96353	3.14612	0.00165451	1
chr8	79766261	79766455	0	Promoter (<=1kb)	HEY1	uc033bqq.2	20	1.47541	22.798	3.14514	0.0016601	0.20846
chr10	62036697	62037098	0	Intron (uc001jlt.3/84159, intron 4 of 9)	ARID5B	uc001jlu.3	-12113	1.33791	24.6971	3.14367	0.00166841	0.20883
chr1	25694754	25695129	0	Intron (uc057dmr.1/57134, intron 2 of 13)	MAN1C1	uc057dmt.1	8252	1.52585	15.6786	3.14174	0.00167948	0.209177
chr1	192550159	192550305	0	Intron (uc057oau.1/uc057oau.1, intron 1 of 1)	RGS1	uc001gsi.2	-25422	1.50002	20.7192	3.14131	0.00168193	0.209177
chr12	9135979	9136278	0	Distal Intergenic	A2M	uc058kzv.1	-19750	1.41065	15.7002	3.13501	0.00171848	0.212366
chr4	85514525	85514797	0	Intron (uc003hpk.4/83478, intron 1 of 9)	ARHGAP24	uc062xxv.1	39039	1.55889	10.9852	3.13254	0.00173302	1
chr7	140207083	140207904	0	Distal Intergenic	KDM7A-DT	uc011kqy.2	29822	1.4171	39.4606	3.13218	0.00173513	0.213745
chr10	84360784	84361279	0	Intron (uc001kdg.3/54462, intron 1 of 2)	CCSER2	uc001kdh.3	32121	1.43946	27.0348	3.1289	0.00175462	0.214786
chr1	224540336	224540624	0	Intron (uc057pve.1/uc057pve.1, intron 2 of 5)	CNIH3	uc001hos.2	-75669	1.48035	29.287	3.12528	0.00177634	0.215001
chr16	56988774	56989417	0	Promoter (<=1kb)	NLRC5	uc010ccq.2	-68	1.27226	65.2953	3.12483	0.00177906	0.215001
chr9	62798933	62799251	0	Promoter (2-3kb)	LINC01410	uc064tkb.1	-2210	1.46411	14.8425	3.12418	0.00178301	0.215001
chr7	106747157	106747886	0	Intron (uc003vds.4/uc003vds.4, intron 2 of 4)	CCDC71L	uc003vdt.4	-86161	1.47944	29.8516	3.12402	0.00178399	0.215001
chr1	19878483	19879082	0	Distal Intergenic	OTUD3	uc001bcs.5	-3431	1.46414	38.8404	3.12085	0.00180327	0.215308
chr2	203869040	203869521	0	Promoter (<=1kb)	CTLA4	uc061rra.1	-711	1.42396	28.1246	3.11894	0.00181502	0.215308
chr7	94374384	94376510	0	Distal Intergenic	COL1A2	uc003ung.1	-18051	1.44948	206.704	3.11822	0.00181948	0.215308
chr2	75570510	75571873	0	Promoter (<=1kb)	EVA1A	uc002snk.1	-788	1.25571	44.1345	3.11822	0.00181948	0.215308
chr2	218720344	218720707	0	Intron (uc010zkl.2/9654, intron 1 of 18)	TTLL4	uc061sol.1	9350	1.35806	32.3394	3.11625	0.00183166	0.215308
chr17	41678273	41679773	0	Distal Intergenic	EIF1	uc060fck.1	-9112	0.89579	119.613	3.11595	0.00183355	0.215308
chr7	106656123	106656483	0	Intron (uc064gwc.1/uc064gwc.1, intron 1 of 4)	CCDC71L	uc003vdt.4	4513	1.48939	25.9117	3.11546	0.00183657	0.215308
chr16	84303681	84304338	0	Intron (uc002fhw.5/58189, intron 1 of 6)	WFDC1	uc002fhv.5	8835	1.43952	41.4382	3.11422	0.00184434	0.215308
chr15	78223327	78223848	0	Intron (uc002bdh.4/23205, intron 1 of 13)	ACSBG1	uc059mck.1	-9828	1.44316	16.1118	3.11311	0.00185126	0.215308
chr22	12601839	12602008	0	Distal Intergenic	OR11H1	uc011agd.3	-2926150	1.28233	4.34898	3.11075	0.00186615	1
chr6	26271675	26272291	0	Promoter (<=1kb)	HIST1H3G	uc003nhi.4	0	1.32585	48.2611	3.11021	0.00186955	0.216596
chr8	131815956	131816435	0	Distal Intergenic	EFR3A	uc003yte.4	-87653	1.52791	12.8319	3.10965	0.00187309	1
chrX	136658712	136658988	0	Intron (uc004faa.4/959, intron 4 of 4)	CD40LG	uc010nsd.4	10485	1.42742	14.5293	3.10789	0.00188427	1
chr6	134186528	134187196	0	Intron (uc003qeo.4/6446, intron 3 of 13)	SGK1	uc011ecw.3	-8623	1.37125	31.4575	3.10665	0.00189223	0.217926
chr4	3538434	3538596	0	Distal Intergenic	LRPAP1	uc003ghh.5	-5875	1.07698	6.15004	3.1052	0.00190149	1
chr8	133389017	133389173	0	Distal Intergenic	ST3GAL1	uc064qlr.1	86761	1.5356	9.88763	3.10508	0.00190229	1
chr19	43765884	43766434	0	Promoter (2-3kb)	KCNN4	uc060zns.1	2543	1.2975	32.1742	3.10338	0.00191323	0.218525
chr4	86497539	86498692	0	Intron (uc010ikh.2/5602, intron 1 of 6)	MIR4452	uc032toy.1	43860	1.22615	57.9688	3.10169	0.00192418	0.218525
chr6	31271443	31273438	0	Promoter (<=1kb)	HLA-C	uc021yul.3	0	1.00326	240.722	3.10151	0.00192536	0.218525
chr7	106611777	106612604	0	Intron (uc064gwc.1/uc064gwc.1, intron 1 of 4)	CCDC71L	uc003vdt.4	48392	1.31125	59.5998	3.10145	0.00192577	0.218525
chr2	25452689	25454146	0	Intron (uc010yko.3/1838, intron 10 of 17)	DTNB	uc061hfp.1	-24673	1.38626	68.2603	3.10063	0.00193112	0.218525
chr1	59697162	59697945	0	3' UTR	FGGY	uc057hap.1	23476	1.40062	30.8142	3.09777	0.00194981	0.219512
chr8	138833129	138833286	0	Exon (uc003yvd.3/169044, exon 5 of 65)	COL22A1	uc064qow.1	-5024	1.38054	7.61865	3.09683	0.00195603	1
chr16	15404409	15404818	0	Intron (uc002ddm.3/255027, intron 1 of 2)	MPV17L	uc059rea.1	8325	1.35444	14.967	3.09598	0.00196163	0.219512
chr4	56744820	56744999	0	Distal Intergenic	HOPX	uc003hcb.3	-62921	1.41367	6.99415	3.09515	0.00196714	1
chr10	28898058	28898707	0	Distal Intergenic	C10orf126	uc057smh.2	50817	1.46127	25.6979	3.09456	0.00197108	0.219512
chr1	192550485	192551045	0	Intron (uc057oau.1/uc057oau.1, intron 1 of 1)	RGS1	uc001gsi.2	-24682	1.34275	55.6172	3.09369	0.00197684	0.219512
chr12	118307078	118308661	0	Intron (uc001twx.4/51347, intron 1 of 20)	TAOK3	uc058tvv.1	50444	1.19859	124.314	3.09332	0.00197932	0.219512
chr11	83116894	83117510	0	Distal Intergenic	PCF11	uc001ozx.5	-39478	1.446	23.6779	3.0915	0.0019915	0.220236
chrX	55711056	55711205	0	Distal Intergenic	RRAGB	uc004duq.4	-6534	1.16408	5.24896	3.0875	0.00201845	1
chr7	113742820	113743309	0	Distal Intergenic	PPP1R3A	uc064hev.1	175687	1.13174	10.5705	3.08645	0.00202562	1
chr1	41890956	41892485	0	Intron (uc001cgz.5/59269, intron 1 of 8)	HIVEP3	uc057fil.1	-21326	1.33089	80.836	3.08628	0.00202679	0.222873
chr2	120231500	120231649	0	Distal Intergenic	TMEM185B	uc002tmj.3	-8092	1.52762	5.51057	3.08239	0.00205348	1
chr17	48541934	48542684	0	Promoter (<=1kb)	HOXB-AS1	uc060gvl.1	-867	1.35962	87.7983	3.07959	0.00207289	0.226334
chr1	84297380	84298127	0	Promoter (<=1kb)	SAMD13	uc001djr.3	-239	1.43669	126.071	3.07887	0.00207789	0.226334
chr16	11273435	11273645	0	Promoter (<=1kb)	PRM3	uc002dat.3	0	1.51405	5.77445	3.07813	0.00208303	1
chr4	87498392	87498759	0	Intron (uc003hqs.5/8404, intron 2 of 10)	SPARCL1	uc062ybd.1	29860	1.52849	10.3345	3.07632	0.00209572	1
chr15	92818642	92820446	0	Exon (uc059nlz.1/uc059nlz.1, exon 1 of 1)	FAM174B	uc059nlp.1	-8844	1.15152	314.705	3.07597	0.00209818	0.227509
chr15	95879636	95879875	0	Distal Intergenic	NR2F2-AS1	uc059npn.1	255594	1.51299	12.7937	3.07377	0.00211373	1
chr5	76716173	76717373	0	Promoter (<=1kb)	F2R	uc063esc.1	0	1.12207	82.5027	3.07323	0.00211758	0.228975
chr12	92404098	92404900	0	Distal Intergenic	CLLU1	uc001tcc.3	-16631	1.44767	33.3312	3.07083	0.00213462	0.229966
chr4	154616320	154617430	0	Distal Intergenic	FGG	uc063ajz.1	-3353	1.40926	32.6503	3.0694	0.00214488	0.229966
chr17	35889867	35890041	0	Distal Intergenic	CCL5	uc060eeh.1	-9074	1.53214	10.0612	3.06924	0.00214603	1
chr15	78073073	78073220	0	Intron (uc002bcy.4/23102, intron 1 of 12)	TBC1D2B	uc002bcy.4	4432	1.38471	17.7215	3.06864	0.00215037	0.229966
chr15	72740499	72740974	0	Distal Intergenic	BBS4	uc059lda.1	4982	1.54059	9.65208	3.06635	0.00216687	1
chr8	103187029	103187387	0	Intron (uc003yld.4/79870, intron 1 of 2)	BAALC-AS1	uc064phz.1	-14889	1.45043	31.756	3.06468	0.00217905	0.231138
chrX	54183825	54184197	0	Promoter (<=1kb)	FAM120C	uc004dta.2	-544	1.5111	13.488	3.06462	0.00217947	1
chr8	100471745	100473170	0	Distal Intergenic	ANKRD46	uc064pay.1	60155	1.39814	51.6704	3.05971	0.00221552	0.232648
chr4	186844000	186844848	0	Distal Intergenic	FAT1	uc063bpe.1	-117278	1.36071	52.074	3.05929	0.00221865	0.232648
chr20	39524120	39525211	0	Distal Intergenic	LINC01734	uc010zwd.2	-299372	1.36805	43.5654	3.059	0.00222077	0.232648
chr4	56414330	56414513	0	Intron (uc003hbr.4/5471, intron 1 of 10)	PPAT	uc062wuq.1	-6002	1.38268	7.36315	3.05862	0.0022236	1
chr5	143414189	143414501	0	Intron (uc003lnd.3/2908, intron 1 of 8)	NR3C1	uc063igf.1	-8866	1.51891	11.5998	3.05804	0.00222789	1
chr1	24722441	24722768	0	Distal Intergenic	CLIC4	uc001bjo.3	-22589	1.44019	12.893	3.05685	0.00223678	1
chr1	108645378	108645618	0	Downstream (2-3kb)	HENMT1	uc057ivs.1	5827	1.416	16.2109	3.05567	0.00224559	0.234354
chr1	187642901	187643138	0	Exon (uc001gsd.4/uc001gsd.4, exon 3 of 3)	LINC01037	uc057nzu.1	199273	1.39675	12.6183	3.053	0.00226568	1
chr8	100386186	100386831	0	Intron (uc064pac.1/25897, intron 1 of 9)	MIR4471	uc022azi.1	3423	1.44111	23.6327	3.05154	0.0022767	0.23508
chr7	95897324	95897746	0	Intron (uc064fnu.1/1780, intron 6 of 16)	DYNC1I1	uc064fnz.1	59706	1.39978	19.9011	3.04792	0.00230434	0.235474
chr1	66445302	66446565	0	Distal Intergenic	PDE4B	uc057hhw.1	77808	1.0679	91.3791	3.04537	0.00232395	0.235474
chr6	31927295	31928402	0	Promoter (<=1kb)	CFB	uc011dor.4	0	1.38208	42.7838	3.04507	0.00232626	0.235474
chr10	92284179	92284468	0	Intron (uc001khw.3/22849, intron 1 of 9)	CPEB3	uc001khw.3	6619	1.46769	17.036	3.04473	0.00232891	0.235474
chr2	230225804	230226340	0	Promoter (<=1kb)	SP140	uc061tiz.1	12	1.35048	27.8019	3.04249	0.00234631	0.236272
chr16	27254465	27254853	0	Intron (uc002doi.2/197370, intron 2 of 7)	NSMCE1	uc059sjc.1	3298	1.41747	33.2239	3.04215	0.00234894	0.236272
chr8	39992815	39993166	0	Intron (uc003xno.2/169355, intron 9 of 10)	IDO2	uc003xnp.2	5072	1.43612	11.2499	3.03814	0.00238047	1
chr2	63996968	63997576	0	Intron (uc002scp.4/51542, intron 1 of 22)	VPS54	uc010fct.4	-21366	1.39917	26.8519	3.03756	0.00238505	0.23867
chr2	75501041	75501187	0	Intron (uc061lai.1/84141, intron 3 of 3)	EVA1A	uc061lan.1	16785	1.54684	8.51619	3.03483	0.00240674	1
chr4	159269249	159269503	0	Promoter (1-2kb)	RAPGEF2	uc003iqg.5	1512	1.4699	18.7118	3.03323	0.0024195	0.239617
chr15	64069768	64070009	0	Promoter (2-3kb)	DAPK2	uc059keq.1	2024	1.42386	14.005	3.03154	0.00243311	1
chr13	45235607	45236107	0	Intron (uc001uzw.4/2963, intron 5 of 7)	GTF2F2	uc058wtu.1	16254	1.5108	11.2296	3.02882	0.00245512	1
chr4	185422192	185422387	0	Promoter (<=1kb)	UFSP2	uc063bkh.1	177	1.51712	10.4019	3.02729	0.00246758	1
chr16	27728946	27729425	0	Intron (uc002dow.4/23247, intron 14 of 27)	KIAA0556	uc059sla.1	27512	1.33066	29.6583	3.02511	0.00248546	0.244067
chrX	136659150	136659579	0	3' UTR	CD40LG	uc010nsd.4	10923	1.37405	24.3871	3.02466	0.00248914	0.244067
chr17	52389616	52390255	0	Distal Intergenic	CA10	uc002ity.4	-229599	1.33729	22.6524	3.02209	0.00251037	0.244677
chr21	25562200	25563220	0	Promoter (<=1kb)	MIR155HG	uc002ylm.5	291	1.27649	61.4371	3.02091	0.00252017	0.244677
chr1	24962998	24963450	0	Promoter (1-2kb)	RUNX3	uc009vrj.4	1534	1.40528	21.0716	3.02087	0.0025205	0.244677
chr1	24289323	24290038	0	Distal Intergenic	GRHL3	uc001bix.3	-29284	1.40689	22.858	3.01555	0.00256514	0.247161
chr1	116755328	116755575	0	Promoter (<=1kb)	CD2	uc057jsp.1	861	1.43155	18.847	3.01468	0.0025725	0.247258
chr1	153636669	153637192	0	Promoter (<=1kb)	CHTOP	uc001fco.3	-892	1.35514	35.6165	3.0127	0.00258934	0.248264
chr11	83062750	83063336	0	Intron (uc031xxr.1/27314, intron 1 of 4)	RAB30	uc031xxr.1	8126	1.39539	15.5647	3.01099	0.00260401	0.248877
chr19	48729065	48729416	0	Exon (uc061avs.1/54922, exon 5 of 15)	RASIP1	uc061avr.1	-3484	0.874053	7.71146	3.01054	0.00260784	1
chr20	29496801	29497989	0	Distal Intergenic	DEFB115	uc002wvp.1	-1759675	1.4074	30.0457	3.00296	0.0026737	0.253852
chr5	137900797	137902427	0	Intron (uc063hie.1/27039, intron 5 of 5)	PKD2L2	uc063hig.1	10833	1.27806	85.034	3.00204	0.0026818	0.254001
chr2	29106949	29107290	0	Intron (uc002rmu.5/79745, intron 1 of 14)	CLIP4	uc010ezm.2	-6706	1.38595	18.7705	2.99942	0.00270492	0.255219
chr4	19077765	19077986	0	Distal Intergenic	LCORL	uc003gpq.4	-1055889	1.11266	4.83226	2.99779	0.00271945	1
chr20	56987262	56989766	0	Distal Intergenic	BMP7	uc061xxq.1	183823	1.34764	335.932	2.99709	0.00272568	0.255574
chr5	9468199	9468488	0	Intron (uc003jek.3/9037, intron 1 of 22)	SEMA5A-AS1	uc032ulp.1	-42845	1.4668	10.1586	2.99657	0.00273032	1
chr8	79765787	79765933	0	Promoter (<=1kb)	HEY1	uc033bqq.2	542	1.43279	20.9172	2.99638	0.00273202	0.255574
chr6	48109455	48110145	0	Distal Intergenic	PTCHD4	uc011dwm.2	-40766	1.38152	16.0013	2.99612	0.00273443	0.255574
chr2	3624123	3624638	0	Intron (uc002qyc.4/78989, intron 3 of 5)	COLEC11	uc010ews.5	18071	1.45272	14.5986	2.99464	0.00274771	1
chr18	11453397	11453565	0	Intron (uc060njy.1/uc060njy.1, intron 1 of 1)	LINC01255	uc060nka.1	-35005	1.17431	4.39078	2.9942	0.00275165	1
chr8	103185009	103185439	0	Intron (uc003yld.4/79870, intron 1 of 2)	BAALC-AS1	uc064phz.1	-12869	1.38121	52.8195	2.99409	0.00275261	0.255574
chr8	143547940	143548333	0	Intron (uc064qyw.1/uc064qyw.1, intron 1 of 1)	GSDMD	uc010mfe.4	-4874	1.42349	19.0881	2.99388	0.00275451	0.255574
chr1	19981896	19982647	0	Promoter (1-2kb)	PLA2G2A	uc057cyd.1	-1480	1.41773	27.2007	2.99321	0.00276063	0.255574
chr17	80585877	80587621	0	Intron (uc010wuf.2/57521, intron 1 of 11)	RPTOR	uc060lfe.1	40211	1.37341	69.6946	2.99275	0.00276473	0.255574
chr4	119940646	119940901	0	Promoter (1-2kb)	LINC02502	uc062zha.1	1106	0.935336	6.82979	2.99093	0.00278134	1
chr1	99440993	99441485	0	Distal Intergenic	LINC01708	uc284mrf.1	51664	1.42157	23.5182	2.99071	0.0027833	0.255574
chr8	123700137	123700989	0	Intron (uc003yqt.4/312, intron 4 of 11)	ANXA13	uc064pyr.1	26934	1.37729	65.5173	2.99066	0.00278376	0.255574
chr8	22673506	22673859	0	Distal Intergenic	BIN3	uc064lci.1	-4358	1.4685	11.0586	2.98935	0.00279568	1
chr6	35596299	35596523	0	Intron (uc011dte.1/2289, intron 6 of 10)	MIR5690	uc031son.1	68266	1.45934	15.0581	2.98676	0.00281948	0.257035
chr2	62318764	62319108	0	Distal Intergenic	B3GNT2	uc061jpq.1	103246	1.51205	10.3564	2.98565	0.00282975	1
chr12	92278861	92279721	0	Intron (uc058rrt.1/uc058rrt.1, intron 2 of 4)	LOC101928617	uc058rrq.1	132680	1.35046	35.6969	2.98388	0.00284619	0.25793
chr18	79156817	79157457	0	Promoter (2-3kb)	ATP9B	uc060qjf.1	2315	1.31709	22.6329	2.98279	0.0028563	0.25793
chr5	57316605	57316927	0	Distal Intergenic	GPBP1	uc063dtw.1	67743	1.4342	11.5768	2.982	0.00286371	1
chr16	53952732	53952992	0	Intron (uc002ehr.4/79068, intron 8 of 8)	FTO	uc059ugo.1	18702	1.64722	6.14252	2.98181	0.00286554	1
chrX	43551925	43552229	0	Distal Intergenic	MAOA	uc011mkw.3	-102678	1.3052	11.1328	2.98057	0.00287714	1
chr17	55023988	55024661	0	Intron (uc002iuf.2/252983, intron 8 of 17)	STXBP4	uc060hqz.1	-6146	1.45789	10.2852	2.97994	0.00288303	1
chr5	175615232	175615431	0	Distal Intergenic	HRH2	uc003mdc.5	-42599	1.42091	12.6425	2.97972	0.00288513	1
chr7	135980984	135981249	0	Distal Intergenic	LUZP6	uc064iih.1	-3631	1.40196	32.8906	2.97968	0.00288547	0.25793
chr20	31894684	31896008	0	Intron (uc002wwy.2/164395, intron 3 of 16)	TTLL9	uc061wdg.1	14847	1.16034	53.6061	2.97866	0.00289516	0.25793
chr8	143547116	143547637	0	Intron (uc064qyw.1/uc064qyw.1, intron 1 of 1)	GSDMD	uc010mfe.4	-5570	1.32269	27.1339	2.9786	0.00289567	0.25793
chr10	3934649	3936276	0	Exon (uc057rho.1/uc057rho.1, exon 1 of 2)	MIR6078	uc031vvi.1	-54884	0.92335	114.505	2.97778	0.0029034	0.25793
chr7	95963671	95964203	0	Intron (uc064fnu.1/1780, intron 6 of 16)	DYNC1I1	uc064foa.1	-68464	1.42365	14.5069	2.97751	0.00290603	1
chr1	89065507	89065770	0	Promoter (<=1kb)	GBP1	uc001dmx.3	-147	1.33856	30.3521	2.97729	0.0029081	0.25793
chr7	95528305	95528750	0	3' UTR	ASB4	uc011kij.3	42404	1.27349	19.5622	2.97721	0.00290881	0.25793
chr6	32529749	32530278	0	Promoter (<=1kb)	HLA-DRB5	uc003obj.4	9	1.19674	30.3961	2.9725	0.00295386	0.260109
chr9	116676104	116676840	0	Intron (uc022bmm.2/23245, intron 16 of 22)	ASTN2	uc004bjp.3	10375	1.37066	11.1612	2.97129	0.00296547	1
chr1	39737930	39738726	0	Promoter (<=1kb)	PPIE	uc057fch.1	-153	1.37851	35.5816	2.97101	0.00296822	0.260109
chr18	11390345	11390692	0	Exon (uc060njx.1/uc060njx.1, exon 1 of 1)	LINC01255	uc060nka.1	-97878	1.10167	25.2395	2.96998	0.00297819	0.260109
chr16	74322703	74323229	0	Intron (uc059xbl.1/uc059xbl.1, intron 1 of 2)	LOC283922	uc059xbn.1	12117	1.42882	20.7038	2.96768	0.00300055	0.260109
chr14	71290790	71291114	0	Distal Intergenic	SIPA1L1	uc059cyj.1	-29335	1.39526	5.70496	2.96759	0.00300146	1
chr18	66725445	66725819	0	Distal Intergenic	CDH19	uc060pxg.1	-121307	1.39986	22.8469	2.96756	0.00300169	0.260109
chr5	74631869	74632200	0	Promoter (<=1kb)	ENC1	uc063eob.1	62	1.37559	15.5765	2.96688	0.00300838	0.260109
chr15	101266889	101267836	0	Downstream (2-3kb)	SELENOS	uc059nyg.1	9451	1.34372	30.8973	2.96686	0.00300856	0.260109
chr17	9330528	9332244	0	Intron (uc002glx.4/9482, intron 7 of 7)	STX8	uc060bds.1	-57094	1.29532	71.9057	2.96685	0.0030087	0.260109
chr4	23888410	23888742	0	Promoter (1-2kb)	PPARGC1A	uc062vps.1	1287	1.39678	37.303	2.96627	0.0030144	0.260109
chr16	22686119	22686582	0	Distal Intergenic	HS3ST2	uc002dli.4	-127595	1.33271	36.8027	2.96444	0.00303231	0.260571
chr2	62414532	62414958	0	Distal Intergenic	TMEM17	uc002sbt.3	91383	1.40237	35.2184	2.96375	0.00303916	0.260584
chr2	104702616	104702926	0	Distal Intergenic	LINC01114	uc061mog.1	51949	1.39903	5.66188	2.96292	0.00304739	1
chr4	190111356	190111749	0	Distal Intergenic	DBET	uc063brk.1	46854	1.35902	15.7027	2.96166	0.0030599	0.26105
chr8	133617098	133617403	0	Distal Intergenic	ST3GAL1	uc064qlo.1	-45158	1.34237	6.03292	2.96126	0.00306379	1
chr13	46124786	46125928	0	3' UTR	CPB2	uc031qlk.1	-19710	1.39635	44.6709	2.96117	0.00306471	0.26105
chr1	170588500	170588694	0	Distal Intergenic	GORAB	uc057nfr.1	43860	1.42193	14.4058	2.96012	0.00307517	1
chr2	239258219	239258387	0	Intron (uc002vyk.4/9759, intron 2 of 26)	HDAC4	uc061ugd.1	-21550	1.52889	8.04857	2.95985	0.00307793	1
chr1	234590112	234590792	0	Distal Intergenic	IRF2BP2	uc057qmg.1	17302	1.38275	32.1395	2.95797	0.0030967	0.263199
chr5	160849893	160850043	0	Promoter (2-3kb)	ATP10B	uc063jgz.1	2111	1.10271	4.63434	2.95781	0.00309829	1
chr16	79651253	79651502	0	Distal Intergenic	MAF	uc002ffn.4	-50539	1.45546	5.18189	2.95673	0.00310915	1
chr5	93092558	93093117	0	Distal Intergenic	NR2F1-AS1	uc063fju.1	329296	1.41642	13.8529	2.95429	0.00313388	1
chr15	44730529	44730913	0	Promoter (1-2kb)	LOC100419583	uc059iqz.1	1387	1.27741	43.8924	2.95404	0.00313646	0.265998
chr1	9163090	9164184	0	Intron (uc284mmt.1/106614088, intron 1 of 1)	MIR34A	uc021ofw.1	-11313	1.13762	75.9617	2.95281	0.00314899	0.26648
chr2	101340939	101341564	0	Distal Intergenic	MIR5696	uc031roo.1	31489	1.40297	11.478	2.9521	0.00315619	1
chr1	89197641	89199652	0	Promoter (<=1kb)	GBP4	uc001dnb.4	0	1.24551	198.851	2.95096	0.0031679	0.26689
chr8	138913411	138913987	0	Promoter (<=1kb)	COL22A1	uc003yvd.3	6	1.4098	22.8122	2.94979	0.00317993	0.26689
chr16	57600859	57602025	0	Distal Intergenic	ADGRG1	uc059utq.1	-8627	1.20053	65.2369	2.94966	0.00318126	0.26689
chr7	107644300	107644768	0	Distal Intergenic	SLC26A4	uc003vep.4	-15867	1.48163	9.87296	2.94771	0.0032014	1
chr1	221336579	221336744	0	Promoter (<=1kb)	C1orf140	uc057pov.1	-283	1.29966	6.64425	2.94745	0.00320407	1
chr2	46186909	46187512	0	3' UTR	PRKCE	uc061iuu.1	35807	1.0889	40.1723	2.9448	0.00323166	0.26872
chr18	11392001	11392264	0	Distal Intergenic	LINC01255	uc060nka.1	-96306	1.24375	20.0872	2.94465	0.00323325	0.26872
chr1	192592552	192592894	0	Distal Intergenic	RGS1	uc057oaz.1	16777	1.26222	28.6237	2.94423	0.00323759	0.26872
chr6	89360007	89360356	0	Distal Intergenic	UBE2J1	uc003pnc.4	-7159	1.41775	13.2646	2.94393	0.00324078	1
chr15	85329462	85330595	0	Distal Intergenic	AKAP13	uc059muc.1	-49976	1.09833	119.601	2.94316	0.00324876	0.269073
chr16	89765149	89765379	0	Promoter (<=1kb)	FANCA	uc059yse.1	-105	1.46996	9.35651	2.94065	0.00327526	1
chr6	32844814	32845576	0	Promoter (<=1kb)	PSMB9	uc063nsf.1	0	1.07559	106.702	2.94014	0.00328062	0.271103
chr16	30622425	30622709	0	Promoter (1-2kb)	ZNF689	uc059tfy.1	1239	1.15744	18.9183	2.93952	0.0032872	0.271103
chr11	118306927	118307182	0	Promoter (2-3kb)	CD3E	uc058hxi.1	2028	1.44612	10.8174	2.93905	0.00329218	1
chr4	155526098	155527255	0	Distal Intergenic	GUCY1A1	uc003iow.4	-139456	1.28095	39.9648	2.93426	0.0033434	0.273148
chr8	29465768	29465999	0	Distal Intergenic	DUSP4	uc003xhm.4	-115100	1.50788	8.99346	2.93413	0.0033448	1
chr1	160673301	160674844	0	Exon (uc057mld.1/uc057mld.1, exon 1 of 4)	SLAMF1	uc057mla.1	-26006	1.37226	131.743	2.93392	0.00334707	0.273148
chr6	53238729	53239089	0	Distal Intergenic	MIR5685	uc031sow.1	-37904	1.33222	15.9729	2.93307	0.00335633	0.27333
chr9	33160482	33160780	0	Intron (uc064soj.1/2683, intron 1 of 2)	B4GALT1-AS1	uc033coo.2	-6195	1.19381	28.1284	2.93128	0.00337566	0.273759
chr2	174574117	174574543	0	Intron (uc002uiw.4/uc002uiw.4, intron 2 of 3)	WIPF1	uc061pvh.1	-3471	1.4244	14.7665	2.92893	0.00340132	1
chr19	38527980	38528948	0	Promoter (<=1kb)	RYR1	uc060yct.1	0	1.25979	13.432	2.92877	0.00340302	1
chr18	9082988	9083444	0	Distal Intergenic	NDUFV2	uc060nfa.1	-19186	1.33678	14.8316	2.92671	0.00342573	1
chrX	150507803	150508288	0	Promoter (1-2kb)	MAMLD1	uc065bos.1	-1037	1.18958	14.706	2.92522	0.00344211	1
chr12	112130062	112130303	0	Intron (uc001ttp.4/10906, intron 1 of 11)	TRAFD1	uc058tkp.1	4499	1.26931	24.9006	2.92356	0.00346048	0.277992
chr1	185405868	185406252	0	Distal Intergenic	GS1-279B7.1	uc057nye.1	-70829	1.3639	34.2252	2.92341	0.00346215	0.277992
chr1	5917405	5917648	0	Intron (uc057bsd.1/261734, intron 9 of 25)	NPHP4	uc057bsk.1	-12081	1.40597	13.5358	2.92187	0.0034794	1
chr13	77974298	77975494	0	Intron (uc001vks.3/100874222, intron 1 of 2)	LINC01069	uc058xqa.1	15152	0.981771	156	2.92105	0.00348848	0.277992
chr16	29074474	29074842	0	Distal Intergenic	LAT	uc059ssd.1	84897	1.43623	11.6332	2.92052	0.00349451	1
chr12	92465547	92465877	0	Intron (uc001tce.1/574028, intron 1 of 1)	CLLU1OS	uc001tcb.1	-37399	1.34564	12.7499	2.92017	0.00349843	1
chrX	96315329	96315617	0	Distal Intergenic	DIAPH2	uc065afa.1	-369046	0.914127	6.34306	2.92008	0.0034994	1
chr10	106286518	106287027	0	Distal Intergenic	LOC105378470	uc057vva.1	102133	1.08559	18.9521	2.91993	0.00350113	0.277992
chr11	89141961	89142404	0	Distal Intergenic	TYR	uc001pcs.4	-35048	1.05079	22.6785	2.91946	0.00350641	0.277992
chr1	19879113	19879281	0	Distal Intergenic	OTUD3	uc001bcs.5	-3232	1.42239	9.29933	2.91942	0.00350682	1
chr4	81214172	81214912	0	Promoter (<=1kb)	PRKG2	uc062xrl.1	122	0.865932	65.2979	2.91744	0.00352914	0.279225
chr9	76894769	76895029	0	Intron (uc010mpk.4/158471, intron 1 of 18)	PRUNE2	uc064tur.1	11012	1.33789	12.0977	2.91677	0.00353682	1
chr1	159091334	159091522	0	Intron (uc057mgr.1/9447, intron 1 of 2)	AIM2	uc001ftj.2	-14433	1.3778	5.88011	2.91655	0.00353927	1
chr4	87912493	87912916	0	Distal Intergenic	SPP1	uc062ybt.1	-62734	1.38473	24.091	2.91598	0.00354579	0.279973
chr2	41611221	41611402	0	Distal Intergenic	LINC01913	uc002rse.3	-266153	1.39217	5.72167	2.91356	0.00357336	1
chr18	59899980	59901116	0	Promoter (<=1kb)	PMAIP1	uc002lid.3	0	0.892035	79.3351	2.91312	0.0035784	0.281097
chr15	90174053	90174280	0	Intron (uc059ndl.1/10509, intron 1 of 3)	SEMA4B	uc059ndn.1	-10638	1.38167	15.3034	2.91283	0.00358168	0.281097
chr17	2265879	2266027	0	Promoter (<=1kb)	SMG6	uc059zls.1	104	1.45072	10.2388	2.91162	0.00359558	1
chr20	23622483	23623604	0	Distal Intergenic	CST3	uc002wtm.5	14341	1.27475	77.4441	2.91122	0.00360018	0.28145
chr19	35213310	35213941	0	Distal Intergenic	FAM187B	uc002nyk.2	14788	1.16757	35.9828	2.91056	0.00360787	0.28145
chr4	108830809	108830955	0	Promoter (1-2kb)	COL25A1	uc062yyi.1	1737	1.47854	4.74832	2.91013	0.00361277	1
chr2	87497818	87497992	0	Intron (uc061lof.1/112597, intron 1 of 1)	CYTOR	uc061lop.1	-11222	1.37691	13.3593	2.90912	0.00362444	1
chr16	74833635	74833932	0	Distal Intergenic	WDR59	uc059xdf.1	52303	1.40779	9.61859	2.90859	0.00363065	1
chr7	94394719	94395548	0	Promoter (<=1kb)	COL1A2	uc064fkx.1	0	1.35033	91.357	2.90816	0.00363562	0.283047
chr19	46426401	46426878	0	Distal Intergenic	CCDC8	uc002pep.4	-12817	1.38963	12.2609	2.90687	0.0036507	1
chr12	22797049	22797219	0	Intron (uc058lxp.1/uc058lxp.1, intron 1 of 3)	ETNK1	uc058lxo.1	125963	0.90272	6.35505	2.9047	0.00367606	1
chr22	28760335	28761106	0	Distal Intergenic	CCDC117	uc003aeb.5	-11568	1.34064	19.931	2.90378	0.00368693	0.283958
chr4	169288684	169288910	0	Distal Intergenic	SH3RF1	uc003isa.2	-17579	1.10611	4.33294	2.90282	0.00369823	1
chr5	9437944	9438738	0	Intron (uc003jek.3/9037, intron 1 of 22)	SEMA5A	uc063cgc.1	-57743	1.29653	30.4868	2.90099	0.00371982	0.283958
chr5	76983024	76983596	0	Distal Intergenic	CRHBP	uc063esj.1	19789	1.31724	21.2917	2.90022	0.00372905	0.283958
chr2	196169899	196171520	0	Promoter (<=1kb)	STK17B	uc061qwp.1	0	0.893188	182.243	2.90016	0.00372975	0.283958
chr14	32494678	32495731	0	Promoter (<=1kb)	AKAP6	uc059aqh.1	0	1.26334	89.5547	2.89957	0.00373677	0.283958
chr4	7759449	7759927	0	3' UTR	AFAP1-AS1	uc003gkd.5	5359	1.4107	12.49	2.89949	0.00373765	1
chr7	104957332	104957732	0	Intron (uc064gst.1/uc064gst.1, intron 1 of 1)	LHFPL3-AS2	uc003vch.1	-30687	1.315	39.9375	2.89935	0.00373934	0.283958
chr1	224579888	224580827	0	Intron (uc057pve.1/uc057pve.1, intron 4 of 5)	CNIH3	uc001hos.2	-35466	1.35163	135.54	2.89907	0.00374267	0.283958
chrX	53072549	53072770	0	Intron (uc004dru.4/54328, intron 1 of 1)	TSPYL2	uc004drx.2	-9597	1.42465	4.7817	2.89843	0.00375042	1
chr11	71973023	71973422	0	Intron (uc001ora.4/55298, intron 3 of 8)	RNF121	uc058eww.1	-10235	1.34946	11.5409	2.89806	0.00375478	1
chr5	83844910	83845489	0	Distal Intergenic	HAPLN1	uc003kin.4	-123297	1.36772	18.5558	2.89763	0.00375994	0.283958
chr7	148564150	148564825	0	Distal Intergenic	C7orf33	uc003wew.3	-25740	1.19494	37.771	2.89751	0.0037614	0.283958
chr20	49303645	49304026	0	Distal Intergenic	SNORD12	uc002xup.1	22962	1.40235	12.6878	2.89739	0.00376284	1
chr20	23966866	23967107	0	Distal Intergenic	GGTLC1	uc061vwb.1	19688	1.00154	10.0202	2.89734	0.00376339	1
chr1	89311810	89312122	0	Distal Intergenic	GBP5	uc057iem.1	-39006	1.35234	17.9543	2.89678	0.0037701	0.283958
chr1	192575779	192576135	0	Promoter (<=1kb)	RGS1	uc057oaz.1	4	1.3225	50.8702	2.89628	0.00377611	0.283958
chr20	19838555	19839077	0	Distal Intergenic	RIN2	uc002wro.3	-47444	1.39663	18.6422	2.89431	0.00379993	0.285009
chr1	100785698	100786011	0	Distal Intergenic	VCAM1	uc057iqw.1	65934	1.46457	8.30421	2.89382	0.00380587	1
chr1	32990019	32990165	0	Intron (uc001bwn.3/uc001bwn.3, intron 1 of 1)	AK2	uc057ent.1	22192	1.44329	8.93169	2.89264	0.00382014	1
chr8	71360433	71360887	0	Promoter (<=1kb)	EYA1	uc064npp.1	844	0.777286	41.0273	2.89025	0.00384934	0.286103
chr22	22559748	22559944	0	Promoter (<=1kb)	PRAME	uc032qie.2	-387	1.40261	13.8587	2.89017	0.00385034	1
chr1	150807738	150809063	0	Promoter (<=1kb)	CTSK	uc001evp.3	0	1.15922	120.009	2.89009	0.00385126	0.286103
chr16	56547399	56548194	0	Distal Intergenic	MT4	uc002eje.1	-16855	1.20118	47.5509	2.8893	0.00386094	0.286276
chr4	124748543	124748819	0	Distal Intergenic	ANKRD50	uc011cgo.3	-35811	0.853403	6.81315	2.88844	0.00387155	1
chr11	102313998	102314169	0	Distal Intergenic	BIRC3	uc058guu.1	-3281	1.37262	17.2387	2.88831	0.00387321	0.286639
chr7	106657286	106657589	0	3' UTR	CCDC71L	uc003vdt.4	3407	1.38005	29.1656	2.8876	0.00388194	0.28674
chr2	163724027	163724239	0	Intron (uc061pbl.1/55137, intron 2 of 2)	FIGN	uc002uck.2	11768	1.15242	12.0308	2.88714	0.00388766	1
chr12	25053900	25054055	0	Promoter (<=1kb)	LRMP	uc058lzx.1	955	1.53863	6.69172	2.8846	0.00391908	1
chr5	72486864	72487049	0	Intron (uc003kce.2/167465, intron 1 of 4)	ZNF366	uc063elc.1	20317	1.45453	7.44292	2.88442	0.00392135	1
chr2	179049162	179050161	0	Promoter (<=1kb)	CCDC141	uc002une.2	0	1.29475	35.1652	2.88425	0.00392345	0.288711
chr20	46637612	46638368	0	Intron (uc061xmw.1/64849, intron 1 of 12)	SLC13A3	uc002xsf.3	13072	1.04418	62.1622	2.88343	0.00393364	0.288746
chr2	88016478	88018101	0	Exon (uc061lov.1/uc061lov.1, exon 1 of 1)	KRCC1	uc002sso.1	37628	1.35139	85.0169	2.88303	0.00393876	0.288746
chr17	50892581	50893580	0	Intron (uc060hne.1/400604, intron 1 of 1)	TOB1	uc021uad.2	-24603	1.3012	75.2283	2.88033	0.00397258	0.288972
chr1	89408814	89409221	0	Distal Intergenic	GBP6	uc001dnf.3	44756	1.39424	16.3884	2.88023	0.0039739	0.288972
chr7	104841034	104841402	0	Intron (uc064gsi.1/375612, intron 2 of 2)	LHFPL3-AS1	uc064gsp.1	-36927	1.15039	41.8805	2.87892	0.0039904	0.288972
chr2	39022507	39022813	0	Promoter (1-2kb)	SOS1	uc061ikt.1	1010	1.3325	41.3265	2.87865	0.00399381	0.288972
chr14	71129843	71130679	0	Distal Intergenic	PCNX1	uc059cyb.1	20823	1.30226	36.4526	2.87778	0.00400485	0.289233
chr17	70563511	70563823	0	Distal Intergenic	KCNJ2	uc002jir.4	393976	1.34786	5.24603	2.87724	0.00401172	1
chr7	135981467	135981929	0	Distal Intergenic	LUZP6	uc064iih.1	-4114	1.34455	49.3979	2.87548	0.00403418	0.290274
chr1	184491285	184492946	0	Intron (uc001gqv.2/81563, intron 2 of 5)	C1orf21	uc057nwx.1	-47047	0.914723	232.259	2.87337	0.00406122	0.291572
chr12	102701990	102702921	0	Distal Intergenic	LINC00485	uc021rct.2	121478	1.36409	24.7388	2.87206	0.00407803	0.291572
chr12	112977682	112979610	0	Promoter (<=1kb)	OAS2	uc001tuj.4	0	1.02213	204.076	2.87191	0.00408004	0.291572
chr22	31829678	31830534	0	Intron (uc011als.2/9681, intron 22 of 39)	DEPDC5	uc062dls.1	-3315	1.27688	31.9792	2.87119	0.00408932	0.291572
chr8	125340907	125341654	0	Intron (uc064qbx.1/286053, intron 5 of 6)	NSMCE2	uc064qcg.1	-21372	1.33782	53.0317	2.87116	0.00408966	0.291572
chr16	19862405	19862898	0	Promoter (<=1kb)	GPRC5B	uc059rpa.1	-65	1.35045	33.9264	2.86952	0.0041109	0.292077
chr6	141484305	141484546	0	Distal Intergenic	NMBR	uc003qiu.3	604253	1.26616	18.5979	2.86826	0.00412736	0.292077
chr8	66534401	66535833	0	Distal Intergenic	MYBL1	uc064njx.1	31125	1.06709	168.057	2.86803	0.0041303	0.292077
chr13	36030397	36031752	0	Intron (uc058wki.1/9201, intron 3 of 16)	DCLK1	uc058wki.1	99554	1.35088	51.0354	2.86629	0.0041531	0.292346
chr7	84085253	84085480	0	Intron (uc003uhz.4/10371, intron 4 of 16)	SEMA3A	uc003uhz.4	109421	1.0372	4.63441	2.86597	0.00415727	1
chr16	22685639	22685991	0	Distal Intergenic	HS3ST2	uc002dli.4	-128186	1.35718	28.3169	2.86335	0.00419193	0.294136
chr7	95527594	95527976	0	Exon (uc003unx.3/51666, exon 3 of 3)	ASB4	uc011kij.3	41693	1.26275	24.2044	2.86291	0.00419765	0.294136
chr6	159701740	159702508	0	Intron (uc063soy.1/uc063soy.1, intron 3 of 7)	SOD2	uc003qsf.6	-8412	1.26622	24.908	2.86214	0.00420792	0.294136
chr4	23305251	23305609	0	Distal Intergenic	PPARGC1A	uc062vpo.1	524062	1.29423	5.73545	2.86192	0.00421081	1
chr6	134317303	134317667	0	Promoter (<=1kb)	SGK1	uc003qep.4	0	1.17057	32.5869	2.86174	0.00421324	0.294136
chr2	12272133	12272371	0	Intron (uc061gts.1/100506457, intron 3 of 4)	MIR3681HG	uc061gtu.1	-41946	1.22494	15.0875	2.86127	0.00421945	0.294136
chr12	9650474	9650724	0	Intron (uc031qfz.2/374443, intron 1 of 3)	LOC374443	uc031qfz.2	7602	1.20189	35.986	2.85994	0.00423727	0.294136
chr15	57440499	57441294	0	Intron (uc002aeg.3/84952, intron 3 of 18)	CGNL1	uc002aeg.3	63994	1.3536	26.7628	2.85981	0.00423897	0.294136
chr18	8895607	8896010	0	Distal Intergenic	MTCL1	uc060nez.1	82762	1.33149	8.46474	2.85909	0.00424852	1
chr1	171142345	171143819	0	Distal Intergenic	MIR1295A	uc021pes.1	-40539	1.34034	97.1006	2.85786	0.00426512	0.295424
chr4	40610265	40610655	0	Intron (uc062wdg.1/54502, intron 1 of 6)	RBM47	uc062wds.1	18874	1.33091	8.58692	2.85782	0.00426567	1
chr1	84248667	84248827	0	Distal Intergenic	SAMD13	uc001djr.3	-49539	1.26544	12.7386	2.85711	0.00427522	1
chr19	39351205	39351552	0	Promoter (2-3kb)	SAMD4B	uc060yjq.1	-2452	1.36951	14.5328	2.85701	0.00427649	1
chr15	90183586	90185261	0	Promoter (<=1kb)	SEMA4B	uc059ndn.1	0	1.17614	107.528	2.85691	0.00427786	0.29578
chr22	36160167	36160344	0	Promoter (<=1kb)	APOL3	uc062dse.1	410	1.34224	18.5883	2.85589	0.00429164	0.295873
chr15	101126733	101127807	0	Distal Intergenic	CHSY1	uc059nya.1	60063	1.1222	81.6726	2.85521	0.00430089	0.295873
chr7	90726576	90726903	0	Promoter (<=1kb)	CDK14	uc064ffr.1	72	1.39351	13.5572	2.85402	0.00431695	1
chr1	66342839	66343050	0	Intron (uc001dcn.4/5142, intron 8 of 16)	PDE4B	uc057hht.1	10650	1.4016	13.8427	2.85401	0.00431716	1
chr4	41234723	41235053	0	Intron (uc031sec.1/101410542, intron 1 of 2)	APBB2	uc062wez.1	-18009	1.50041	6.99747	2.85304	0.00433025	1
chr10	6507757	6507941	0	Intron (uc057rni.1/5588, intron 2 of 16)	PRKCQ	uc057rni.1	4231	1.11542	3.68136	2.85267	0.00433537	1
chr20	49679249	49679446	0	Intron (uc002xuu.5/9334, intron 1 of 8)	B4GALT5	uc002xuu.5	34432	1.26061	16.2005	2.852	0.00434452	0.297117
chr4	111991084	111991769	0	Intron (uc062zau.1/uc062zau.1, intron 1 of 2)	FAM241A	uc003iah.3	-153628	1.34316	32.3761	2.85155	0.00435062	0.297117
chr17	59160456	59160930	0	5' UTR	PRR11	uc060ibt.1	4699	1.34075	23.5234	2.84904	0.0043851	0.298425
chrX	41468219	41468545	0	Intron (uc004dfh.3/60506, intron 1 of 1)	NYX	uc064yqo.1	-3636	1.34258	12.2991	2.84848	0.00439285	1
chr1	200624442	200624710	0	3' UTR	KIF14	uc010ppk.2	-3708	1.37281	17.2866	2.84787	0.00440123	0.298999
chr1	228810936	228811346	0	Distal Intergenic	RHOU	uc001htf.3	75859	1.3775	10.8519	2.84778	0.00440258	1
chr2	242068726	242069678	0	Intron (uc032oxt.2/101927289, intron 3 of 3)	LINC01238	uc061uvh.1	96688	1.1306	81.2397	2.84378	0.00445815	0.301602
chr2	75528461	75529014	0	Intron (uc032nrt.1/101927884, intron 1 of 2)	LOC101927884	uc032nrt.1	4393	1.2553	30.3309	2.84378	0.00445822	0.301602
chr8	116833926	116834072	0	Intron (uc064prj.1/84294, intron 2 of 2)	RAD21	uc064prs.1	15411	1.14493	11.5037	2.84352	0.00446176	1
chr8	71535805	71535974	0	Exon (uc003xyw.3/uc003xyw.3, exon 2 of 4)	EYA1	uc003xyu.3	-173573	1.38981	4.63287	2.84319	0.00446638	1
chr1	6868059	6868335	0	Intron (uc001aoi.3/23261, intron 3 of 22)	CAMTA1	uc057bwz.1	-5721	1.31936	14.1667	2.84302	0.00446883	1
chr1	100720207	100720772	0	Promoter (<=1kb)	VCAM1	uc057iqw.1	443	1.30588	27.2788	2.84148	0.00449046	0.302947
chr15	70528469	70528708	0	Distal Intergenic	SALRNA3	uc059kvn.1	-86839	1.38331	10.747	2.84017	0.0045089	1
chr6	32638370	32638531	0	Promoter (<=1kb)	HLA-DQA1	uc063nrd.1	939	1.51675	5.98772	2.83995	0.00451205	1
chr1	92538414	92538898	0	Intron (uc001dox.3/7813, intron 17 of 17)	GFI1	uc001dow.5	-51538	1.27088	18.903	2.83914	0.00452356	0.303856
chr14	90858532	90859221	0	3' UTR	TTC7B	uc059ehu.1	-42053	1.34618	24.5155	2.83908	0.00452441	0.303856
chr7	106405829	106406731	0	Intron (uc064gwc.1/uc064gwc.1, intron 4 of 4)	NAMPT	uc064gvy.1	-119503	1.28194	41.2863	2.83887	0.00452736	0.303856
chr13	24184060	24184785	0	Intron (uc058vxl.1/221178, intron 3 of 15)	MIR2276	uc021rhh.1	21644	1.29322	32.1179	2.83763	0.00454492	0.304509
chr19	6517683	6517963	0	Distal Intergenic	TNFSF9	uc002mfh.2	-13036	1.37953	15.5865	2.83682	0.00455655	0.304764
chr13	24183465	24183643	0	Intron (uc058vxl.1/221178, intron 3 of 15)	MIR2276	uc021rhh.1	21049	1.28935	8.88337	2.83593	0.0045692	1
chr7	104651354	104652406	0	Intron (uc064gsi.1/375612, intron 1 of 2)	LHFPL3-AS1	uc064gsq.1	151133	1.31717	70.6452	2.83592	0.00456941	0.3051
chr2	174843293	174843568	0	Promoter (2-3kb)	CHN1	uc061pvy.1	2837	1.2258	15.1168	2.83469	0.00458703	0.305752
chr9	138172534	138172729	0	Distal Intergenic	LOC101928932	uc064xod.1	30596	1.25965	13.1199	2.83419	0.00459414	1
chr2	107621873	107622038	0	Distal Intergenic	GACAT1	uc061mrb.1	-132074	1.04575	4.22408	2.83397	0.00459742	1
chr10	98392164	98392385	0	Promoter (2-3kb)	MIR1287	uc021pwu.1	2922	1.20363	14.1835	2.83369	0.00460142	1
chr7	129374846	129375415	0	Promoter (<=1kb)	AHCYL2	uc011kox.3	-228	1.32825	25.0882	2.83236	0.00462057	0.306081
chr5	139414397	139415249	0	Intron (uc003len.4/202052, intron 7 of 7)	DNAJC18	uc063hrh.1	5061	1.10826	34.7207	2.83211	0.00462418	0.306081
chrX	43604205	43604474	0	Distal Intergenic	MAOA	uc011mkw.3	-50433	0.968931	4.95066	2.83203	0.00462536	1
chr10	62708391	62708571	0	Distal Intergenic	ZNF365	uc057tnk.1	64520	1.53294	5.8427	2.8313	0.00463598	1
chr16	19784922	19785767	0	Intron (uc059roj.1/124152, intron 5 of 5)	IQCK	uc059rou.1	23733	1.33328	30.707	2.83095	0.00464103	0.306081
chr2	12303534	12304150	0	Intron (uc061gts.1/100506457, intron 3 of 4)	MIR3681HG	uc061gtu.1	-10167	1.34372	43.3405	2.83091	0.00464161	0.306081
chr1	89409521	89409671	0	Distal Intergenic	GBP6	uc001dnf.3	45463	1.1925	6.30603	2.8306	0.00464602	1
chr4	123399123	123400810	0	Promoter (<=1kb)	SPRY1	uc003ifb.5	0	1.16517	275.558	2.83054	0.00464701	0.306081
chr4	24742184	24742445	0	Distal Intergenic	SOD3	uc062vqj.1	-47467	1.007	8.7966	2.82978	0.00465807	1
chr8	103174447	103174621	0	Promoter (2-3kb)	BAALC-AS1	uc064phz.1	-2307	1.22183	6.08094	2.8291	0.00466793	1
chr15	64905214	64905642	0	Intron (uc059khh.1/80301, intron 5 of 5)	ANKDD1A	uc059khj.1	-6260	1.37973	12.6368	2.82881	0.00467221	1
chr6	31494073	31495477	0	Promoter (<=1kb)	MICB	uc011dnm.3	0	1.15868	99.0986	2.82838	0.00467842	0.30763
chr3	64462395	64462663	0	Distal Intergenic	PRICKLE2	uc062lfs.1	-16919	1.40628	8.76735	2.82624	0.00470986	1
chr15	43913059	43913294	0	Intron (uc059iny.1/84978, intron 5 of 13)	FRMD5	uc059iog.1	-3132	1.35788	13.9386	2.82579	0.00471648	1
chr12	107110345	107110738	0	Intron (uc058sst.1/uc058sst.1, intron 2 of 3)	CRY1	uc001tmi.5	-16516	1.29082	12.434	2.8255	0.00472066	1
chr1	174413795	174415040	0	Intron (uc001gjw.4/9910, intron 13 of 13)	GPR52	uc001gka.2	-33071	1.32386	40.7127	2.8254	0.00472222	0.309604
chr6	27815041	27815696	0	Promoter (<=1kb)	HIST1H2BM	uc003njo.4	0	1.12812	45.088	2.82525	0.00472435	0.309604
chr6	32665326	32665493	0	Promoter (1-2kb)	HLA-DQB1	uc063nre.1	1145	1.42474	9.57626	2.82506	0.00472723	1
chr11	111996752	111997265	0	Intron (uc031yfb.2/85458, intron 17 of 19)	DIXDC1	uc058hgw.1	3022	1.33196	12.0021	2.82455	0.00473465	1
chr2	58064008	58064483	0	Intron (uc002rzo.3/7444, intron 5 of 15)	VRK2	uc061jjm.1	17133	1.32598	17.8385	2.82358	0.00474909	0.310702
chr11	115930659	115930957	0	Distal Intergenic	LINC00900	uc009yzb.3	-170032	1.13835	13.9438	2.82306	0.00475682	1
chr8	79783598	79784196	0	Promoter (<=1kb)	LINC01607	uc064nwp.1	0	1.37831	14.4205	2.82278	0.00476095	1
chr7	106102052	106102367	0	Intron (uc003vdo.5/6856, intron 1 of 4)	SYPL1	uc064gvl.1	-4190	1.24295	11.304	2.82273	0.00476164	1
chr15	99806087	99806437	0	Distal Intergenic	LYSMD4	uc059nuy.1	-72526	1.36052	11.6705	2.8224	0.00476663	1
chr3	45075428	45077111	0	Distal Intergenic	CLEC3B	uc062ixd.1	45298	1.23311	66.1478	2.82177	0.00477597	0.311482
chr2	119388061	119388451	0	Distal Intergenic	DBI	uc061nid.1	17844	1.34286	18.2988	2.8217	0.00477701	0.311482
chr4	111681380	111682435	0	Distal Intergenic	FAM241A	uc003iah.3	-462962	1.2569	58.7099	2.82013	0.00480045	0.311788
chr17	20009591	20009763	0	Promoter (<=1kb)	SPECC1	uc060cpg.1	-100	1.36466	4.56061	2.8193	0.00481278	1
chr8	78932625	78933075	0	Distal Intergenic	IL7	uc022awj.2	-127102	1.36248	17.12	2.81897	0.00481776	0.311788
chr20	20452618	20453007	0	Intron (uc002wry.5/57186, intron 31 of 32)	RALGAPA2	uc061vte.1	59593	1.31402	16.982	2.818	0.00483243	0.311788
chr12	65885702	65886046	0	Intron (uc001ssx.4/8091, intron 3 of 4)	LOC100129940	uc058qmg.1	-3535	1.34882	24.8704	2.81781	0.00483521	0.311788
chr1	209726927	209727374	0	Promoter (2-3kb)	HSD11B1-AS1	uc057pca.1	-2802	1.27944	16.4163	2.81751	0.00483983	0.311788
chrX	97563229	97564131	0	Promoter (<=1kb)	DIAPH2-AS1	uc065afg.1	374	1.22352	31.1801	2.81711	0.00484579	0.311788
chr13	55054047	55054988	0	Distal Intergenic	MIR5007	uc031qlv.1	-119466	1.07442	18.4789	2.81648	0.00485528	0.311883
chr1	168347978	168348905	0	Distal Intergenic	MIR557	uc021pel.1	-26619	1.28137	54.9351	2.81512	0.00487592	0.312675
chr13	43045646	43045811	0	Intron (uc058wrj.1/29103, intron 1 of 3)	DNAJC15	uc001uyy.4	22443	1.25146	5.648	2.81459	0.00488401	1
chr2	217695344	217695991	0	Intron (uc061sgu.1/729582, intron 1 of 10)	DIRC3	uc061sgw.1	60564	1.32341	17.1289	2.81429	0.00488854	0.312675
chr1	108645810	108647729	0	Downstream (<1kb)	HENMT1	uc057ivs.1	3716	1.09393	207.396	2.81408	0.00489169	0.312675
chr7	66150816	66151090	0	Promoter (<=1kb)	CRCP	uc064dzq.1	153	1.35685	13.9127	2.81272	0.00491243	1
chr5	76676954	76677110	0	Promoter (<=1kb)	IQGAP2	uc063ery.1	-44	1.30246	13.978	2.81202	0.00492309	1
chr2	111452099	111452304	0	Intron (uc002the.3/uc002the.3, intron 1 of 5)	MIR4435-2HG	uc061mxw.1	-10478	1.42539	9.02979	2.8119	0.00492495	1
chr7	104783223	104783378	0	Intron (uc064gsi.1/375612, intron 2 of 2)	LHFPL3-AS1	uc064gsq.1	20161	1.13301	21.3166	2.81121	0.00493548	0.314552
chrX	97126253	97126906	0	Intron (uc065afa.1/1730, intron 21 of 26)	RPA4	uc004efv.5	242345	1.35176	19.7289	2.8111	0.00493722	0.314552
chr1	226882194	226883549	0	Promoter (1-2kb)	PSEN2	uc057pzf.1	-1074	1.24934	84.8227	2.80922	0.00496611	0.315166
chr21	27512684	27512927	0	Distal Intergenic	LINC00113	uc011acl.1	-209452	1.25221	5.60507	2.80876	0.00497332	1
chr12	9867543	9867844	0	Promoter (1-2kb)	CLEC2B	uc058lbc.1	1510	1.18473	45.8376	2.80869	0.00497433	0.315166
chr9	5510154	5511144	0	Promoter (<=1kb)	PDCD1LG2	uc003zjg.5	0	1.19334	51.5952	2.80742	0.00499396	0.315166
chr4	40316062	40317507	0	Promoter (<=1kb)	LINC02265	uc021xnr.2	0	0.947539	120.719	2.8071	0.00499902	0.315166
chr8	119672304	119673401	0	Promoter (<=1kb)	ENPP2	uc064ptr.1	52	1.29359	40.3938	2.80701	0.00500039	0.315166
chr1	47587740	47588214	0	Distal Intergenic	FOXD2	uc001crm.3	151723	1.37609	10.8425	2.80695	0.00500136	1
chr12	127082985	127083697	0	Distal Intergenic	LINC02405	uc058vba.1	-22584	1.32769	37.7258	2.80591	0.00501747	0.315166
chr1	212566483	212567634	0	Promoter (1-2kb)	ATF3	uc001hjf.4	1149	1.01781	110.874	2.80577	0.00501973	0.315166
chr5	145505953	145506236	0	Intron (uc063igz.1/153768, intron 1 of 2)	PRELID2	uc063igz.1	258764	1.39193	7.38212	2.80517	0.00502907	1
chr5	143922480	143922717	0	Distal Intergenic	HMHB1	uc003lnj.5	110319	1.39324	7.96811	2.80391	0.00504869	1
chr14	63101712	63101951	0	Promoter (<=1kb)	KCNH5	uc001xfz.3	0	0.925813	5.15652	2.80303	0.00506248	1
chr7	53812102	53812331	0	Promoter (<=1kb)	LINC01446	uc022adj.1	-171	1.04866	7.94608	2.80181	0.00508165	1
chr16	19610278	19610891	0	Promoter (2-3kb)	VPS35L	uc059rnz.1	2489	1.35766	14.053	2.79992	0.00511147	1
chrX	111123108	111123440	0	Promoter (<=1kb)	PAK3	uc065asd.1	4	1.49039	5.79024	2.79977	0.00511391	1
chr12	26817254	26817944	0	Intron (uc001rhg.4/3709, intron 1 of 56)	ITPR2	uc001rhi.2	14837	1.31848	20.0805	2.79956	0.00511726	0.320257
chr7	102859062	102860757	0	Intron (uc003vas.3/222235, intron 16 of 18)	FBXL13	uc064gpv.1	-42791	1.1361	79.9823	2.79823	0.00513832	0.321059
chr2	12412722	12412886	0	Intron (uc002rbu.3/100506457, intron 4 of 5)	MIR3681HG	uc061gtu.1	98405	1.45371	6.69153	2.79763	0.0051479	1
chr4	123398723	123399078	0	Promoter (<=1kb)	SPRY1	uc031sgz.1	337	1.25209	58.2414	2.79736	0.00515213	0.321077
chr17	48547853	48548010	0	Promoter (1-2kb)	HOXB-AS1	uc060gvn.1	1161	1.27635	16.0334	2.79718	0.00515512	0.321077
chr1	149176601	149176942	0	Intron (uc057kkf.1/uc057kkf.1, intron 1 of 2)	NBPF9	uc031uvu.2	-73040	1.28525	14.0158	2.79566	0.00517945	1
chr6	165568447	165568766	0	Intron (uc063suf.1/10846, intron 2 of 22)	PDE10A	uc003quo.4	93303	1.45754	7.01607	2.79508	0.00518876	1
chr8	125700115	125700853	0	Distal Intergenic	LINC00861	uc064qcm.1	250297	1.25754	52.2335	2.79427	0.0052017	0.323114
chr20	8114652	8114939	0	Promoter (<=1kb)	PLCB1	uc061vhv.1	145	1.02773	8.08938	2.79412	0.00520404	1
chr6	145022142	145022897	0	Distal Intergenic	UTRN	uc063sat.1	183093	1.32109	24.4172	2.7941	0.00520442	0.323114
chr7	129102262	129102548	0	Distal Intergenic	TSPAN33	uc033ahb.2	-42344	1.2496	9.33722	2.79296	0.00522287	1
chr4	56799699	56800391	0	Distal Intergenic	SPINK2	uc062wvo.1	11405	1.06143	55.9914	2.79185	0.00524073	0.323363
chr14	32494149	32494443	0	Promoter (<=1kb)	AKAP6	uc059aqg.1	0	1.11303	23.4317	2.79166	0.00524388	0.323363
chr15	23514800	23514946	0	Distal Intergenic	MIR4508	uc021sfz.1	47185	1.39561	10.1721	2.7913	0.00524973	1
chr5	137889450	137890001	0	Promoter (<=1kb)	PKD2L2	uc063hif.1	0	1.08973	53.6203	2.79128	0.00524997	0.323363
chr7	51350940	51351177	0	Distal Intergenic	COBL	uc064drj.1	-34122	1.12708	6.84242	2.79036	0.0052649	1
chr12	75705226	75705372	0	Intron (uc058rcj.1/uc058rcj.1, intron 2 of 4)	KRR1	uc058rci.1	-193590	1.0932	7.15924	2.7895	0.00527892	1
chr15	44710325	44713209	0	Promoter (<=1kb)	PATL2	uc059iqk.1	0	0.794545	608.664	2.78896	0.0052878	0.323509
chr1	204578190	204579783	0	Distal Intergenic	MDM4	uc057ore.1	35401	1.30536	66.0056	2.78892	0.00528845	0.323509
chr1	160521731	160522106	0	Promoter (1-2kb)	SLAMF6	uc010pji.3	1136	1.31948	16.7567	2.78858	0.00529389	0.323509
chr7	159012985	159013192	0	Intron (uc064jtr.1/154822, intron 1 of 3)	LINC00689	uc003wog.4	-4216	1.35099	8.74675	2.78789	0.00530527	1
chr17	11852623	11852786	0	Promoter (<=1kb)	DNAH9	uc060bhv.1	-406	0.806927	6.38005	2.78607	0.00533521	1
chr1	44947530	44947871	0	Intron (uc001cmu.3/8891, intron 3 of 10)	EIF2B3	uc057fwy.1	-20875	1.35763	12.6528	2.7844	0.00536265	1
chr1	24963576	24964947	0	Promoter (<=1kb)	RUNX3	uc009vrj.4	37	1.30792	66.0368	2.78432	0.00536397	0.326201
chr7	129285340	129285604	0	Intron (uc011kov.3/23382, intron 1 of 16)	AHCYL2	uc003vot.4	60290	1.31849	10.151	2.78411	0.00536744	1
chr10	72104125	72104319	0	Intron (uc021pso.1/51008, intron 9 of 9)	SPOCK2	uc057txg.1	-15093	1.34694	14.8026	2.7837	0.00537429	1
chr16	87463965	87465480	0	Intron (uc002fjz.2/23174, intron 1 of 12)	ZCCHC14	uc002fka.2	26379	0.973893	143.897	2.78283	0.00538868	0.326229
chr8	71357401	71357549	0	Promoter (<=1kb)	EYA1	uc003xyt.6	-712	1.10866	14.7845	2.78258	0.00539284	1
chrX	136935818	136936098	0	Distal Intergenic	RBMX	uc065bio.1	-55054	1.43085	7.6995	2.78256	0.00539311	1
chr11	64484147	64484492	0	Distal Intergenic	LOC100996455	uc031qbj.2	35073	1.35075	7.48623	2.77967	0.00544137	1
chr15	95843950	95844697	0	Distal Intergenic	NR2F2-AS1	uc059npn.1	290772	1.30525	54.7074	2.77868	0.00545796	0.327882
chr2	225042136	225042556	0	Promoter (<=1kb)	DOCK10	uc010fwz.2	0	1.21624	25.4299	2.77584	0.00550595	0.329232
chr4	83357005	83357220	0	Distal Intergenic	HPSE	uc062xvv.1	-21852	1.37957	9.32884	2.77346	0.00554628	1
chr2	196928133	196928335	0	Promoter (1-2kb)	PGAP1	uc002uty.2	-1403	1.31513	14.9633	2.7703	0.00560053	0.333862
chr2	28717931	28718098	0	Intron (uc061hsr.1/uc061hsr.1, intron 1 of 1)	PPP1CB	uc061hsu.1	-33542	1.35627	8.15846	2.77027	0.00560102	1
chr5	60186508	60186654	0	Intron (uc003jsb.5/5144, intron 1 of 16)	PDE4D	uc003jse.2	75905	1.37173	6.88437	2.76948	0.00561462	1
chr13	37293691	37293921	0	Distal Intergenic	CSNK1A1L	uc001uwm.2	-188027	1.00649	8.21557	2.76822	0.0056364	1
chr10	47207110	47207376	0	Distal Intergenic	GDF10	uc001jfb.4	-93010	1.38742	8.08045	2.76665	0.00566359	1
chr1	204416468	204418116	0	Intron (uc057oqp.1/uc057oqp.1, intron 1 of 2)	PPP1R15B	uc001hav.5	-4677	1.12302	173.93	2.76647	0.00566669	0.336774
chr14	20802996	20803142	0	Promoter (<=1kb)	RNASE1	uc001vyi.4	136	1.35529	8.19919	2.76629	0.00566987	1
chr2	181125199	181125748	0	Promoter (1-2kb)	LINC01934	uc061qhu.1	1257	1.21031	35.5886	2.7655	0.00568352	0.33726
chr17	47204567	47204717	0	Intron (uc060gnf.1/4635, intron 1 of 6)	MYL4	uc060gnf.1	4121	1.34459	10.1519	2.76528	0.00568746	1
chr1	153866348	153866494	0	Intron (uc001fdb.5/57459, intron 1 of 10)	GATAD2B	uc284mtd.1	-48820	1.11494	3.16991	2.76512	0.00569021	1
chrX	121308023	121308282	0	Distal Intergenic	MIR3672	uc033ete.1	-62690	1.4124	6.58235	2.76449	0.00570124	1
chr20	56555413	56555745	0	Distal Intergenic	FAM209B	uc002xxz.5	22167	1.33062	14.6634	2.76386	0.00571217	1
chr6	155183942	155184215	0	Promoter (<=1kb)	TIAM2	uc063slj.1	627	1.18014	14.2988	2.76376	0.00571399	1
chr1	197335573	197336065	0	Intron (uc010ppb.3/23418, intron 2 of 9)	CRB1	uc057odi.1	-24284	1.2218	12.9283	2.76337	0.00572082	1
chr2	157440550	157440859	0	Promoter (1-2kb)	CYTIP	uc061otk.1	-1136	1.27193	30.0389	2.76276	0.00573145	0.338468
chr3	64343395	64344453	0	Intron (uc062lfo.1/166336, intron 2 of 8)	PRICKLE2	uc062lfr.1	-75416	1.10271	53.9249	2.76273	0.00573199	0.338468
chr1	153628486	153629517	0	Promoter (<=1kb)	S100A1	uc057lcm.1	22	1.01732	153.054	2.76214	0.00574234	0.338468
chr4	99574713	99575123	0	Promoter (<=1kb)	MTTP	uc003hvb.4	0	1.33822	12.4043	2.76189	0.00574673	1
chr12	22678054	22678206	0	Intron (uc001rft.4/55500, intron 6 of 7)	ETNK1	uc058lxo.1	6968	1.0809	3.38638	2.76124	0.0057582	1
chr7	116582937	116583413	0	Intron (uc064hhi.1/100996266, intron 1 of 2)	LINC01510	uc064hhh.1	-9193	1.28297	23.8226	2.761	0.00576245	0.338844
chr7	39593281	39593516	0	Intron (uc032zkl.2/57002, intron 2 of 2)	YAE1	uc064czp.1	23027	1.36795	7.69723	2.75989	0.00578207	1
chr6	95518539	95518941	0	Distal Intergenic	MANEA-DT	uc032xey.2	58509	1.13891	10.0729	2.75984	0.00578288	1
chr17	48647141	48647858	0	Intron (uc060gwr.1/uc060gwr.1, intron 1 of 5)	HOXB7	uc060gwi.1	-13569	1.31654	21.2758	2.75724	0.00582918	0.341858
chr5	143433840	143435779	0	Promoter (<=1kb)	NR3C1	uc003lnd.3	0	1.23598	115.814	2.75687	0.00583578	0.341858
chr4	3745617	3746398	0	Distal Intergenic	ADRA2C	uc003ghm.4	-20000	1.31672	29.7386	2.75663	0.00584004	0.341858
chr2	41715297	41715587	0	Distal Intergenic	LINC01913	uc002rse.3	-161968	1.37395	10.199	2.75657	0.00584119	1
chr17	66581491	66581759	0	Intron (uc060izy.1/5578, intron 3 of 9)	PRKCA-AS1	uc002jfq.2	-164637	1.17253	11.3723	2.75646	0.00584299	1
chr20	38091535	38091842	0	3' UTR	RPRD1B	uc061wxa.1	6159	1.18989	30.7073	2.75614	0.00584884	0.341858
chr16	19877176	19877351	0	Intron (uc002dgt.4/51704, intron 1 of 3)	GPRC5B	uc059roz.1	-4331	1.34363	10.2979	2.75576	0.00585555	1
chr1	84406936	84407369	0	Promoter (<=1kb)	DNASE2B	uc001dju.2	-861	1.20167	34.5958	2.75322	0.00590115	0.342521
chr13	34677874	34678088	0	Distal Intergenic	LINC00457	uc031qld.3	-37189	1.26079	5.09376	2.75238	0.00591634	1
chr15	90287172	90287567	0	Intron (uc059nej.1/51335, intron 1 of 3)	NGRN	uc059nek.1	20829	1.32241	13.0443	2.75174	0.00592788	1
chr7	107693759	107693911	0	Promoter (<=1kb)	SLC26A4	uc064gzd.1	427	1.33651	11.2073	2.75052	0.00595002	1
chr8	138909697	138909899	0	Intron (uc003yvd.3/169044, intron 1 of 64)	COL22A1	uc003yvd.3	4094	0.954724	4.24731	2.74981	0.00596306	1
chr3	18111777	18112322	0	Intron (uc062hft.1/9779, intron 1 of 8)	LOC339862	uc062hgw.1	98122	1.33453	11.6037	2.74544	0.00604305	1
chr10	91007167	91007371	0	Distal Intergenic	LINC00502	uc057uvm.1	-39795	1.3533	9.80928	2.74542	0.00604336	1
chr6	147107264	147107504	0	Intron (uc003qlt.3/729178, intron 4 of 10)	STXBP5-AS1	uc063scp.1	11959	1.43228	5.92357	2.74518	0.0060477	1
chr7	103119637	103120221	0	Promoter (<=1kb)	NAPEPLD	uc064gqp.1	0	1.25228	43.6972	2.74512	0.00604893	0.34748
chr12	12111089	12111664	0	Intron (uc001raf.2/79370, intron 3 of 6)	LRP6	uc058lhz.1	20166	1.32477	10.6632	2.74505	0.00605013	1
chr6	141403860	141404198	0	Distal Intergenic	NMBR	uc003qiu.3	684601	1.18402	14.2313	2.74465	0.00605745	1
chr20	2626574	2626850	0	Intron (uc002wgf.1/117532, intron 17 of 19)	TMC2	uc061vao.1	24408	1.11158	6.21879	2.74402	0.00606915	1
chr1	185338300	185339919	0	Distal Intergenic	GS1-279B7.1	uc057nye.1	-3261	0.90193	230.845	2.74398	0.00606999	0.34748
chr20	19945549	19945785	0	Intron (uc002wro.3/54453, intron 3 of 11)	RIN2	uc061vrx.1	10424	1.32282	12.8401	2.74349	0.00607904	1
chr13	33739456	33739703	0	Distal Intergenic	STARD13	uc058wjj.1	-62688	1.00963	3.84004	2.74341	0.00608038	1
chr4	14856773	14857196	0	Intron (uc003gne.4/201853, intron 2 of 6)	LINC00504	uc003gnf.4	30971	1.26998	19.4584	2.7419	0.00610844	0.347781
chrX	53004326	53005265	0	Distal Intergenic	FAM156A	uc064zjo.1	-8854	1.28929	23.084	2.74165	0.00611311	0.347781
chr5	137630225	137630838	0	Promoter (<=1kb)	KLHL3	uc063hhn.1	-282	1.28557	22.6424	2.74143	0.00611726	0.347781
chr7	107068886	107069217	0	Promoter (<=1kb)	PRKAR2B	uc064gwp.1	-408	1.13161	6.37524	2.74141	0.0061177	1
chr1	25707663	25708060	0	Promoter (1-2kb)	MAN1C1	uc057dmu.1	-1542	1.26054	20.8079	2.74129	0.00611992	0.347781
chr2	174486039	174487028	0	Promoter (<=1kb)	GPR155	uc061pva.1	0	1.14622	63.7075	2.73996	0.00614475	0.347783
chr1	19980903	19981568	0	Promoter (<=1kb)	PLA2G2A	uc057cyd.1	-487	1.29565	22.188	2.73985	0.00614676	0.347783
chr13	46679307	46680046	0	Promoter (<=1kb)	LRCH1	uc058wxc.1	0	1.11849	34.5349	2.73891	0.00616424	0.348266
chr15	45637316	45637649	0	Promoter (2-3kb)	SQOR	uc001zvv.4	2576	1.06022	27.8311	2.73767	0.00618764	0.349081
chr15	52558782	52558994	0	Promoter (1-2kb)	ARPP19	uc059jje.1	-1038	1.37996	9.4632	2.73703	0.00619975	1
chr15	98858606	98859078	0	Intron (uc002bul.4/3480, intron 2 of 20)	IGF1R	uc059nsf.1	-14641	1.27779	40.3198	2.73613	0.00621661	0.349506
chr10	92284522	92285331	0	Intron (uc001khw.3/22849, intron 1 of 9)	CPEB3	uc001khw.3	5756	1.21644	38.4385	2.73584	0.0062221	0.349506
chr3	45061540	45061686	0	Distal Intergenic	CLEC3B	uc062ixd.1	31410	1.33975	12.1125	2.73556	0.00622736	1
chr7	25117283	25117601	0	Downstream (2-3kb)	CYCS	uc064cdd.1	7648	1.32226	11.6894	2.73492	0.00623958	1
chr13	29754515	29754804	0	Distal Intergenic	UBL3	uc001usp.4	95880	1.3758	8.25006	2.73463	0.00624509	1
chr8	115430414	115430757	0	Intron (uc003yny.5/7227, intron 5 of 6)	TRPS1	uc064pqp.1	61464	1.22305	19.4154	2.73382	0.00626044	0.351153
chr6	152184138	152184500	0	Promoter (<=1kb)	SYNE1	uc063sia.1	911	1.32922	13.1124	2.73318	0.00627252	1
chr2	25591755	25591993	0	Intron (uc010yko.3/1838, intron 5 of 17)	DTNB	uc061hfz.1	4463	1.38071	6.40481	2.7327	0.0062818	1
chr6	141491390	141491754	0	Distal Intergenic	NMBR	uc003qiu.3	597045	1.29895	7.78397	2.7321	0.00629311	1
chr7	34070010	34070533	0	Promoter (2-3kb)	BMPER	uc064css.1	2778	1.28102	15.7593	2.73204	0.0062943	0.351177
chr14	50956971	50957318	0	Exon (uc059bli.1/uc059bli.1, exon 2 of 2)	PYGL	uc001wyu.4	-12235	1.18046	11.1338	2.73168	0.00630125	1
chr7	107529712	107529858	0	Intron (uc003ved.3/10466, intron 5 of 20)	COG5	uc064gxr.1	18474	1.26332	7.92108	2.73167	0.00630134	1
chr7	93146694	93148464	0	Promoter (<=1kb)	SAMD9L	uc003umh.2	0	1.04336	134.386	2.73079	0.0063182	0.351177
chr2	62569687	62570214	0	Distal Intergenic	TMEM17	uc061jpt.1	-57793	1.27941	22.7142	2.73026	0.00632843	0.351177
chrX	39439970	39440853	0	Distal Intergenic	LINC01282	uc033dzr.1	-48196	1.29984	16.4022	2.72958	0.00634157	0.351177
chr7	2023822	2024023	0	Intron (uc064ayk.1/8379, intron 10 of 16)	MAD1L1	uc064ayo.1	-43031	1.32396	6.71167	2.72869	0.0063587	1
chr20	16573537	16574811	0	Promoter (<=1kb)	KIF16B	uc010gci.3	-104	0.995218	109.96	2.72807	0.00637069	0.351761
chr8	95124507	95124796	0	Distal Intergenic	PLEKHF2	uc003yhn.3	-9008	1.30894	29.1529	2.7267	0.00639707	0.352718
chr18	1406972	1407362	0	Promoter (<=1kb)	LINC00470	uc002kld.1	0	1.14773	5.93631	2.72602	0.0064104	1
chr6	12967626	12968385	0	Intron (uc010jpc.4/221692, intron 4 of 14)	PHACTR1	uc003nag.3	249965	1.22388	33.5685	2.72483	0.00643344	0.35359
chr20	39357549	39357990	0	Distal Intergenic	LINC01734	uc010zwd.2	-132801	1.25493	40.8501	2.72449	0.00644013	0.35359
chr2	219701985	219702188	0	Intron (uc061taj.1/uc061taj.1, intron 1 of 1)	SLC4A3	uc061tag.1	68639	0.875295	5.01067	2.72425	0.00644469	1
chr22	50539906	50540276	0	Distal Intergenic	ODF3B	uc062fne.1	-7326	1.1137	48.686	2.72257	0.00647757	0.354758
chr2	43438921	43439819	0	Intron (uc002rsx.4/63892, intron 26 of 37)	THADA	uc061iqw.1	23440	1.23358	34.0191	2.72247	0.00647964	0.354758
chr17	15278544	15279081	0	Intron (uc060blh.1/uc060blh.1, intron 1 of 2)	PMP22	uc060bla.1	-13218	1.29734	18.657	2.71997	0.00652876	0.356222
chr1	214427569	214428798	0	Intron (uc001hkk.3/5784, intron 3 of 18)	PTPN14	uc057pkd.1	-51163	1.0303	91.2667	2.71916	0.00654472	0.356317
chr15	62120021	62120167	0	Distal Intergenic	C2CD4B	uc002ahg.3	45116	1.39834	6.90143	2.71822	0.00656338	1
chr20	19946008	19946182	0	Intron (uc002wro.3/54453, intron 3 of 11)	RIN2	uc061vrx.1	10883	1.27007	13.943	2.71816	0.00656465	1
chr13	76471204	76471889	0	Distal Intergenic	KCTD12	uc010aeu.2	414501	1.15052	10.8174	2.71796	0.00656865	1
chr13	20881811	20882138	0	Intron (uc001unq.5/64328, intron 1 of 22)	XPO4	uc058vup.1	20609	1.33481	14.1617	2.71724	0.0065828	1
chr2	25522162	25522535	0	Intron (uc010yko.3/1838, intron 8 of 17)	DTNB	uc061hft.1	-24511	1.21091	20.0071	2.71647	0.00659815	0.357636
chr9	31908702	31909137	0	Distal Intergenic	ACO1	uc033coh.2	-475466	1.33128	8.65445	2.71632	0.00660111	1
chr5	142445357	142446616	0	Intron (uc063iep.1/101926941, intron 3 of 3)	SPRY4-AS1	uc063iet.1	41139	1.27117	74.3936	2.71512	0.00662509	0.357636
chr2	177273538	177273737	0	Intron (uc002uli.6/4780, intron 4 of 7)	NFE2L2	uc002ulh.6	-8407	1.12752	6.02898	2.71364	0.00665491	1
chr8	133389535	133390693	0	Distal Intergenic	ST3GAL1	uc064qlr.1	85241	1.22255	89.879	2.71359	0.00665587	0.357636
chr15	95874590	95874941	0	Distal Intergenic	NR2F2-AS1	uc059npn.1	260528	1.27514	23.1697	2.71338	0.00666012	0.357636
chr1	204101583	204102230	0	Intron (uc001hal.4/9580, intron 1 of 6)	SOX13	uc057opv.1	-10686	1.09293	54.8377	2.71333	0.00666099	0.357636
chr1	84148043	84148272	0	Intron (uc001djj.3/5567, intron 1 of 9)	PRKACB	uc057hyl.1	3721	1.1436	14.1272	2.71332	0.00666126	1
chr1	182113915	182114794	0	Distal Intergenic	ZNF648	uc001goz.3	-52203	1.27517	25.7488	2.71289	0.00667001	0.357636
chr5	127011836	127011982	0	Intron (uc003kuf.4/115123, intron 1 of 4)	2020-03-03	uc063gox.1	18187	1.20857	8.85402	2.71277	0.00667234	1
chr4	84298288	84298803	0	Distal Intergenic	LOC101928978	uc062xwy.1	-4876	0.803886	5.56679	2.70975	0.00673346	1
chr1	147756484	147757079	0	3' UTR	GJA5	uc021ovl.2	3527	1.28697	31.787	2.70946	0.00673934	0.359866
chr9	35617673	35617881	0	Promoter (<=1kb)	CD72	uc064sxg.1	472	1.32438	6.80059	2.70706	0.0067883	1
chr8	123489786	123489949	0	Distal Intergenic	FBXO32	uc064pyi.1	16676	1.32639	12.7088	2.70704	0.00678861	1
chr6	31356490	31357155	0	Promoter (<=1kb)	HLA-B	uc063nah.1	0	1.01703	73.9844	2.70688	0.00679181	0.362171
chr2	169348701	169349030	0	Intron (uc002ues.4/4036, intron 1 of 78)	LRP2	uc010zdf.2	13504	1.26005	21.0339	2.70385	0.00685407	0.363004
chr11	89135484	89135731	0	Distal Intergenic	TYR	uc001pcs.4	-41721	1.00512	13.7968	2.70333	0.00686478	1
chr16	90090539	90090923	0	Promoter (1-2kb)	PRDM7	uc059ywn.1	1149	1.24552	24.4951	2.70299	0.00687189	0.363454
chr3	64824397	64824616	0	Intron (uc062lgy.1/100507098, intron 3 of 4)	ADAMTS9	uc003dmg.4	-136397	0.999149	3.57941	2.70282	0.00687537	1
chr17	50033008	50033400	0	Distal Intergenic	PICART1	uc021tzv.1	22339	1.33485	8.32182	2.70229	0.00688639	1
chr17	51132291	51132564	0	Distal Intergenic	SPAG9	uc002itb.4	-11426	1.31798	10.6365	2.70208	0.00689071	1
chr7	134689617	134690254	0	Distal Intergenic	BPGM	uc064iff.1	29196	1.26611	55.2397	2.70184	0.00689579	0.363993
chr2	84939085	84939332	0	Distal Intergenic	KCMF1	uc061let.1	-31761	1.38954	5.90347	2.70126	0.00690779	1
chr5	95822030	95823943	0	Promoter (<=1kb)	GLRX	uc063fnd.1	0	0.762726	192.481	2.70088	0.00691567	0.363993
chr12	7934592	7936205	0	Promoter (<=1kb)	SLC2A3	uc058kut.1	0	0.847446	228.784	2.70069	0.00691949	0.363993
chr2	24398858	24399019	0	Distal Intergenic	ITSN2	uc002rfe.3	-38144	1.36613	7.59226	2.69758	0.00698446	1
chrX	40876910	40877166	0	Distal Intergenic	MED14	uc064ypm.1	-141052	1.02691	3.40161	2.69755	0.00698526	1
chr17	36089850	36090013	0	Promoter (<=1kb)	CCL3	uc002hkv.5	128	1.39157	6.2409	2.69682	0.0070005	1
chr2	121901921	121903263	0	Distal Intergenic	TSN	uc061nmk.1	145750	1.25872	53.9367	2.69651	0.007007	0.367317
chr4	83349696	83350227	0	Distal Intergenic	HPSE	uc062xvv.1	-14543	1.31307	17.0426	2.69602	0.0070173	0.367317
chr17	31312229	31312499	0	Promoter (1-2kb)	EVI2B	uc060dqn.1	1606	1.22792	17.7449	2.69543	0.00702984	0.367317
chr11	57652637	57652811	0	Promoter (2-3kb)	YPEL4	uc058bnh.1	-2693	1.29633	11.5343	2.69468	0.00704556	1
chr8	23230442	23231345	0	Exon (uc003xdb.1/389641, exon 3 of 3)	LOC389641	uc064lds.1	4808	1.24144	19.4192	2.69284	0.00708472	0.36898
chr7	130242485	130242843	0	Distal Intergenic	CPA2	uc003vpq.4	-23984	1.33245	9.17576	2.69278	0.00708593	1
chr16	28187152	28187786	0	Intron (uc002dpb.4/23214, intron 2 of 24)	XPO6	uc059sma.1	-6030	1.16346	35.1226	2.69275	0.00708644	0.36898
chr6	27133100	27134127	0	Promoter (<=1kb)	HIST1H2AG	uc003niw.4	58	0.724997	147.689	2.69245	0.00709291	0.36898
chr8	131857269	131857652	0	Distal Intergenic	EFR3A	uc003yte.4	-46436	1.24038	11.8926	2.69214	0.00709959	1
chr1	231511523	231511741	0	Distal Intergenic	TSNAX-DISC1	uc010pwg.2	-16912	1.36713	7.96545	2.69209	0.00710052	1
chr2	121903383	121903790	0	Distal Intergenic	TSN	uc061nmk.1	147212	1.25201	16.7207	2.69201	0.00710236	0.36898
chr4	87311289	87311456	0	Intron (uc010ikk.4/345275, intron 4 of 5)	MIR5705	uc031sfz.1	-10706	1.0767	6.40948	2.6917	0.00710885	1
chr14	49405122	49405353	0	Distal Intergenic	RPS29	uc059bfh.1	180972	1.22324	4.91661	2.69159	0.00711129	1
chr12	68785904	68786150	0	Intron (uc058qrg.1/55508, intron 1 of 1)	MDM2	uc021rah.4	-22022	1.30188	11.9244	2.6913	0.00711742	1
chr1	45365261	45365767	0	Intron (uc009vxr.2/10420, intron 3 of 8)	TOE1	uc057fzm.1	23965	1.22184	30.2497	2.69063	0.00713166	0.369168
chr1	246155688	246156005	0	Intron (uc057qyh.2/64754, intron 5 of 11)	SMYD3	uc057qyl.1	37722	1.28551	20.773	2.68953	0.00715526	0.369461
chr1	246188586	246189360	0	Exon (uc057qyr.1/uc057qyr.1, exon 1 of 1)	SMYD3	uc057qyl.1	4367	1.26236	46.1081	2.68948	0.00715631	0.369461
chr15	55800077	55800502	0	Distal Intergenic	PRTG	uc059jmv.1	-56987	1.37844	6.55272	2.68843	0.00717883	1
chr8	94417793	94418001	0	Intron (uc010may.3/25788, intron 1 of 12)	RAD54B	uc064oqi.1	-18210	1.38916	6.53826	2.68784	0.0071916	1
chr3	141380197	141380710	0	Intron (uc062olg.1/253461, intron 3 of 7)	ZBTB38	uc062olk.1	-4100	1.29722	15.2596	2.68683	0.00721329	0.371417
chr15	48982265	48982523	0	Distal Intergenic	SECISBP2L	uc059izm.1	13966	1.19147	19.3136	2.68549	0.00724233	0.372149
chr18	63300234	63300484	0	Intron (uc002liu.2/596, intron 1 of 1)	BCL2	uc002lit.2	19302	1.3016	12.7814	2.68381	0.00727884	1
chr15	85330781	85331073	0	Distal Intergenic	AKAP13	uc059muc.1	-49498	1.11965	21.1402	2.68323	0.00729143	0.372149
chr10	92278952	92279624	0	Intron (uc001khw.3/22849, intron 1 of 9)	CPEB3	uc001khw.3	11463	1.27628	19.8038	2.68276	0.00730177	0.372149
chr16	28539825	28540130	0	Promoter (<=1kb)	NUPR1	uc002dqe.2	-651	1.24136	21.0493	2.68253	0.00730679	0.372149
chr1	192523665	192524162	0	Intron (uc057oau.1/uc057oau.1, intron 1 of 1)	RGS1	uc001gsi.2	-51565	1.20387	63.0283	2.68204	0.00731758	0.372149
chr1	151494383	151495310	0	Distal Intergenic	CGN	uc057kxa.1	-15200	1.06508	46.9537	2.68149	0.00732962	0.372149
chr7	100545360	100545803	0	Intron (uc064gew.1/3268, intron 1 of 6)	AGFG2	uc064gey.1	-4623	1.15499	37.9055	2.68131	0.00733343	0.372149
chr15	25643228	25643779	0	Distal Intergenic	ATP10A	uc059gwk.1	40256	1.29246	17.1725	2.68126	0.00733454	0.372149
chr1	203764362	203764673	0	Promoter (<=1kb)	LAX1	uc001haa.4	-503	1.25525	14.1772	2.68044	0.00735255	1
chr2	64952650	64952900	0	Distal Intergenic	SLC1A4	uc061jug.1	-35577	1.4084	6.08668	2.67862	0.0073926	1
chr1	162970736	162970974	0	Distal Intergenic	RGS4	uc001gcl.5	-97801	1.40167	6.5873	2.67831	0.00739945	1
chr8	79766791	79767694	0	Promoter (<=1kb)	HEY1	uc064nwk.1	0	1.19845	131.54	2.67811	0.00740389	0.372571
chr7	100802433	100803679	0	3' UTR	EPHB4	uc064gho.1	3900	1.08656	73.5396	2.67749	0.00741754	0.372571
chr1	169116332	169116858	0	Intron (uc001gfr.2/481, intron 3 of 6)	ATP1B1	uc057ndi.1	8425	1.23719	41.1764	2.67585	0.00745393	0.373384
chr16	19857865	19858477	0	3' UTR	GPRC5B	uc059rpa.1	3863	1.27122	23.9664	2.6752	0.00746857	0.373384
chr7	106260606	106261222	0	Intron (uc003vdq.4/10135, intron 8 of 10)	NAMPT	uc064gvq.1	-6988	1.25764	34.0452	2.67482	0.00747689	0.373384
chr11	58572971	58573294	0	Promoter (2-3kb)	LPXN	uc058bpm.1	2542	1.20875	43.5698	2.67461	0.00748169	0.373384
chr2	63994415	63994561	0	Intron (uc002scp.4/51542, intron 1 of 22)	VPS54	uc010fct.4	-18813	1.02807	6.66754	2.67414	0.00749219	1
chr20	10978249	10978778	0	Intron (uc061vjx.1/uc061vjx.1, intron 4 of 4)	LOC101929413	uc032paq.1	-68977	1.23773	15.4521	2.67402	0.00749484	0.373562
chr13	21135761	21136073	0	Distal Intergenic	SAP18	uc001uns.4	-4441	1.19118	8.03031	2.67376	0.00750068	1
chr7	106768314	106768462	0	Intron (uc003vds.4/uc003vds.4, intron 1 of 4)	PIK3CG	uc003vdv.6	-96816	1.35343	6.18152	2.67252	0.00752832	1
chr1	241689399	241690140	0	Intron (uc001hzg.3/128025, intron 7 of 26)	WDR64	uc057qtc.1	5819	1.28638	22.61	2.67147	0.00755206	0.375452
chr7	12257269	12258469	0	Distal Intergenic	TMEM106B	uc064box.1	26911	1.16286	44.7161	2.67057	0.00757236	0.375981
chr3	122642857	122643014	0	Distal Intergenic	PARP15	uc062naq.1	21509	0.979581	3.54975	2.67016	0.00758156	1
chr2	26412199	26412582	0	Intron (uc002rhg.2/92749, intron 1 of 16)	DRC1	uc061hhq.1	-8572	1.29367	11.4551	2.66916	0.00760414	1
chr8	50304624	50305070	0	Intron (uc010lxy.3/54212, intron 3 of 19)	SNTG1	uc064msl.1	-89128	1.08641	12.0339	2.66811	0.00762787	1
chr3	191658757	191659825	0	Distal Intergenic	LINCR-0002	uc062rkz.1	90222	1.06284	23.9803	2.66796	0.00763136	0.376796
chr1	234618830	234619364	0	Distal Intergenic	IRF2BP2	uc001hwg.3	-9305	1.25267	76.3173	2.66786	0.00763371	0.376796
chr15	92723627	92723918	0	Intron (uc059nlp.1/400451, intron 1 of 3)	FAM174B	uc059nln.1	-55584	1.28879	17.5722	2.66774	0.00763636	0.376796
chr8	123699745	123700068	0	Intron (uc003yqt.4/312, intron 4 of 11)	ANXA13	uc064pyr.1	27855	1.26238	21.5157	2.66718	0.00764898	0.376796
chr7	95595300	95597461	0	Promoter (<=1kb)	PDK4	uc003uoa.4	0	1.24937	181.04	2.66685	0.00765653	0.376796
chr1	149254446	149254612	0	Distal Intergenic	NBPF9	uc031uvu.2	-150885	0.957122	3.74664	2.66679	0.00765798	1
chr6	134267642	134268603	0	Intron (uc003qeo.4/6446, intron 1 of 13)	SGK1	uc063rod.1	-5583	1.07796	50.5968	2.66637	0.00766745	0.376857
chr3	172615512	172615805	0	Distal Intergenic	NCEH1	uc062pzw.1	20379	1.32712	8.1498	2.66525	0.00769305	1
chr7	94588116	94588489	0	3' UTR	SGCE	uc064flr.1	10648	1.25828	14.3392	2.66354	0.00773226	1
chr4	4333097	4333449	0	Exon (uc062uvy.1/uc062uvy.1, exon 3 of 3)	NSG1	uc003ghz.4	-14691	1.27681	10.5325	2.66347	0.00773396	1
chr5	175590915	175591215	0	Distal Intergenic	HRH2	uc003mdc.5	-66815	1.32213	8.07934	2.66269	0.00775198	1
chrX	41560287	41560538	0	Promoter (1-2kb)	CASK	uc064yqr.1	1089	1.01619	6.5748	2.66237	0.00775929	1
chr5	76547835	76548573	0	Promoter (<=1kb)	IQGAP2	uc032uza.2	426	1.07085	39.7806	2.66215	0.00776426	0.379698
chr9	70013824	70014027	0	Distal Intergenic	MAMDC2	uc004ahm.3	-29554	1.28144	4.22725	2.66107	0.00778939	1
chrX	119756930	119757145	0	Promoter (1-2kb)	SOWAHD	uc010nql.4	-1468	1.30442	9.73618	2.66086	0.00779418	1
chr1	234620309	234620470	0	Distal Intergenic	LINC00184	uc021pkr.1	-8841	1.26231	24.0677	2.6602	0.00780938	0.38047
chr1	10457595	10458005	0	3' UTR	CORT	uc001ari.5	7876	1.29892	10.6148	2.65886	0.00784058	1
chrX	43890962	43891307	0	Distal Intergenic	MAOB	uc004dfz.5	-8515	1.19078	10.0332	2.65874	0.00784342	1
chr20	10496479	10496811	0	Intron (uc010zre.3/128710, intron 2 of 7)	SLX4IP	uc010zre.3	61176	1.16914	17.4458	2.65794	0.00786193	0.380657
chr8	125341761	125342379	0	Intron (uc064qbx.1/286053, intron 5 of 6)	NSMCE2	uc064qcg.1	-20647	1.19124	59.5394	2.65793	0.00786211	0.380657
chr16	15488894	15489605	0	Intron (uc059rdx.1/255027, intron 1 of 1)	C16orf45	uc002ddp.4	-12661	1.21786	51.6854	2.65713	0.00788083	0.381089
chr4	23969623	23970802	0	Distal Intergenic	PPARGC1A	uc062vpw.1	-65534	1.25519	46.4261	2.65643	0.00789722	0.381164
chr1	200887817	200888099	0	Promoter (2-3kb)	INAVA	uc057ofy.1	-2949	1.33445	8.55135	2.65564	0.0079158	1
chr1	246187017	246187335	0	Intron (uc057qyh.2/64754, intron 5 of 11)	SMYD3	uc057qyl.1	6392	1.22748	18.2373	2.65512	0.00792801	0.381398
chr2	223647922	223648355	0	Distal Intergenic	SCG2	uc002vnm.4	-45419	1.24335	24.8038	2.65381	0.00795878	0.381398
chr7	129109839	129110691	0	Distal Intergenic	TSPAN33	uc033ahb.2	-34201	1.1131	73.1663	2.65343	0.00796783	0.381398
chr20	39359854	39360260	0	Distal Intergenic	LINC01734	uc010zwd.2	-135106	1.24372	27.3039	2.65331	0.00797058	0.381398
chr11	115940883	115941475	0	Intron (uc058hqb.1/uc058hqb.1, intron 2 of 3)	LINC00900	uc009yzb.3	-180256	1.19292	24.3631	2.65325	0.00797199	0.381398
chr20	39623409	39623587	0	Distal Intergenic	LINC01370	uc032pjw.2	-380890	1.22858	4.57319	2.65317	0.00797405	1
chr6	90425065	90425599	0	Distal Intergenic	MAP3K7	uc063qdc.1	111619	1.284	12.525	2.65269	0.00798529	1
chr6	164149553	164149703	0	Distal Intergenic	QKI	uc063stt.1	583095	1.03529	6.55435	2.65236	0.00799303	1
chr1	84436449	84436595	0	Distal Intergenic	DNASE2B	uc001dju.2	28219	1.20471	13.2722	2.65232	0.00799405	1
chr1	172826240	172826929	0	Intron (uc057niw.1/uc057niw.1, intron 1 of 4)	FASLG	uc001git.4	167096	1.1068	38.0637	2.65149	0.00801376	0.381398
chr1	66373799	66374448	0	3' UTR	PDE4B	uc057hhw.1	6305	1.10648	37.9633	2.65033	0.00804137	0.381398
chr4	77697793	77698413	0	Distal Intergenic	CNOT6L	uc062xog.1	33468	1.19593	21.3593	2.64983	0.00805323	0.381398
chr6	32854219	32855448	0	Promoter (<=1kb)	PSMB9	uc003sga.4	58	0.922749	186.021	2.64981	0.0080537	0.381398
chr2	174595603	174596664	0	Promoter (1-2kb)	WIPF1	uc002ujb.3	1101	1.09093	158.65	2.64881	0.00807761	0.381398
chr2	96773959	96774431	0	Intron (uc002swx.3/26504, intron 1 of 6)	CNNM4	uc002swx.3	13057	1.23062	18.0668	2.64876	0.0080787	0.381398
chr15	94021178	94022135	0	Intron (uc059nnu.1/uc059nnu.1, intron 2 of 4)	LINC01581	uc059nod.1	77215	1.15269	37.9134	2.64834	0.00808879	0.381398
chr12	9123822	9124319	0	Distal Intergenic	A2M	uc058kzv.1	-7593	1.24566	36.9042	2.6481	0.00809446	0.381398
chr2	37571978	37572148	0	Distal Intergenic	CDC42EP3	uc061iew.1	75510	1.27804	22.0759	2.6469	0.00812334	0.381444
chr21	28836203	28836511	0	Distal Intergenic	N6AMT1	uc002ymo.3	48860	1.24531	7.20428	2.64647	0.0081336	1
chr1	162943090	162943251	0	Distal Intergenic	CCDC190	uc057mvl.1	-74275	1.01685	3.13177	2.64354	0.00820429	1
chr14	50044368	50044960	0	Intron (uc284nlb.1/196913, intron 3 of 11)	LINC01599	uc001wxl.4	-3139	1.08988	60.9836	2.64265	0.00822602	0.383623
chr4	87313454	87313635	0	Intron (uc010ikk.4/345275, intron 4 of 5)	HSD17B13	uc010ikk.4	9251	1.25302	7.24901	2.64209	0.00823959	1
chr3	64468496	64468707	0	Distal Intergenic	PRICKLE2	uc062lfs.1	-23020	1.21014	7.80895	2.64184	0.00824574	1
chr15	44736407	44736784	0	Promoter (<=1kb)	TRIM69	uc001zui.2	0	1.13836	25.5391	2.64044	0.00827981	0.385153
chr4	57110554	57111416	0	Promoter (<=1kb)	IGFBP7	uc011cag.3	-169	1.18345	58.0748	2.63947	0.00830348	0.385153
chr4	83356645	83356809	0	Distal Intergenic	HPSE	uc062xvv.1	-21492	1.30203	7.26848	2.63928	0.00830816	1
chr16	81505397	81505622	0	Intron (uc002fgp.5/80790, intron 1 of 20)	CMIP	uc002fgq.4	10048	1.24574	3.96208	2.63918	0.00831075	1
chr6	38599435	38600068	0	Promoter (1-2kb)	BTBD9	uc063ohh.1	-1341	1.16004	31.2202	2.63894	0.00831651	0.385153
chr4	55007767	55009359	0	Distal Intergenic	KDR	uc062wrn.1	87361	1.1831	59.8067	2.63893	0.00831692	0.385153
chr5	8826996	8827211	0	Distal Intergenic	LINC02199	uc032ulo.2	-12521	1.2424	29.6949	2.63864	0.00832389	0.385153
chr2	163726152	163726461	0	Intron (uc061pbl.1/55137, intron 2 of 2)	FIGN	uc002uck.2	9546	1.21443	26.8913	2.6382	0.00833477	0.385153
chr12	70535579	70535872	0	Intron (uc058qxi.1/uc058qxi.1, intron 5 of 5)	PTPRB	uc058qxq.1	4187	1.25872	16.2298	2.63755	0.00835075	0.385153
chr3	190100711	190102142	0	Intron (uc011bsk.3/55214, intron 1 of 14)	P3H2	uc062rjo.1	14506	1.24101	81.1251	2.63615	0.00838537	0.385836
chr4	56777372	56777626	0	Distal Intergenic	SPINK2	uc062wvo.1	34170	1.32519	6.87245	2.63594	0.00839036	1
chr2	63746293	63746629	0	Intron (uc061jra.1/51057, intron 2 of 7)	WDPCP	uc061jra.1	81214	1.17143	14.243	2.6352	0.00840866	1
chr17	50421097	50422202	0	Distal Intergenic	ACSF2	uc060hhr.1	-3956	1.02485	90.8608	2.63432	0.00843064	0.387461
chr1	224727772	224728048	0	Intron (uc057pvj.1/uc057pvj.1, intron 3 of 5)	CNIH3	uc001hos.2	111479	1.13116	32.2891	2.63359	0.00844882	0.387839
chrX	43881854	43882208	0	Promoter (<=1kb)	MAOB	uc064yrn.1	95	1.22168	8.88537	2.63347	0.00845161	1
chr13	40419660	40420231	0	Distal Intergenic	LINC00598	uc058wow.1	40178	1.25225	16.0236	2.63259	0.00847374	0.388524
chr16	11825024	11825262	0	Intron (uc059qwy.1/400500, intron 2 of 2)	BCAR4	uc059qxb.1	3549	1.25449	9.07884	2.6309	0.00851584	1
chr11	128610695	128611032	0	Distal Intergenic	ETS1	uc001qej.3	-23137	1.17114	13.7653	2.63041	0.00852829	1
chr4	85514958	85515134	0	Intron (uc003hpk.4/83478, intron 1 of 9)	ARHGAP24	uc062xxv.1	39472	1.30027	8.0736	2.62956	0.00854942	1
chr17	13395970	13396290	0	Distal Intergenic	MIR548H3	uc032euf.1	147356	1.2889	8.33365	2.62917	0.00855929	1
chr20	38093981	38094216	0	Intron (uc061www.1/58490, intron 2 of 2)	RPRD1B	uc061wxa.1	8605	1.13286	19.8906	2.62854	0.00857526	0.392043
chr11	75367995	75368945	0	Distal Intergenic	ARRB1	uc001owf.3	-16290	1.20853	38.3512	2.62782	0.00859332	0.392043
chr1	84437258	84437692	0	Distal Intergenic	DNASE2B	uc001dju.2	29028	1.19044	46.562	2.62731	0.00860627	0.392043
chr8	8345442	8345820	0	Intron (uc064kbu.1/157285, intron 2 of 4)	PRAG1	uc064kbu.1	35927	1.10203	24.9418	2.62731	0.0086063	0.392043
chrX	65655645	65656080	0	Intron (uc064zqh.1/4478, intron 1 of 3)	MSN	uc004dwf.4	-11590	1.10593	8.78046	2.62654	0.0086259	1
chr17	48541070	48541763	0	Promoter (1-2kb)	HOXB-AS1	uc060gvl.1	-1788	1.23275	83.3933	2.62628	0.00863235	0.392043
chr5	92980125	92980272	0	Distal Intergenic	NR2F1-AS1	uc063fju.1	442141	1.07031	2.80636	2.62591	0.00864175	1
chr11	59198599	59199122	0	Intron (uc001nnr.3/23220, intron 7 of 8)	DTX4	uc058brh.1	3707	1.24553	17.6878	2.62488	0.00866789	0.392173
chr1	160672245	160673026	0	Exon (uc057mld.1/uc057mld.1, exon 1 of 4)	SLAMF1	uc057mla.1	-24950	1.23373	65.5943	2.6243	0.00868281	0.392173
chr1	117655885	117656082	0	Distal Intergenic	TENT5C	uc001ehe.4	49951	1.32246	7.09684	2.62417	0.00868613	1
chr12	31953785	31953950	0	Distal Intergenic	KIAA1551	uc058mnk.1	-5420	1.27781	11.6365	2.62353	0.0087024	1
chr2	96164475	96164826	0	Distal Intergenic	DUSP2	uc002svk.5	-19035	1.23585	17.5232	2.62299	0.00871609	0.39287
chr17	13592815	13592962	0	Intron (uc002gob.1/9955, intron 1 of 1)	HS3ST3A1	uc002gob.1	8965	0.929916	3.80769	2.62166	0.00875016	1
chr2	47298697	47299238	0	Intron (uc061ixw.1/101927043, intron 2 of 2)	BCYRN1	uc032nmf.2	-31822	1.21146	17.5972	2.62163	0.00875099	0.393815
chr8	131466687	131466870	0	Distal Intergenic	ADCY8	uc003ytd.5	-424261	1.00002	3.25504	2.62056	0.00877865	1
chr6	36386235	36387673	0	Promoter (<=1kb)	ETV7	uc003olz.3	0	1.10399	90.6482	2.62043	0.00878188	0.394134
chr10	88271024	88271901	0	Downstream (1-2kb)	RNLS	uc057usr.1	311289	0.966236	46.0356	2.62018	0.00878845	0.394134
chr4	109262950	109263099	0	Intron (uc062yyd.1/84570, intron 3 of 36)	COL25A1	uc062yyd.1	39268	0.755131	5.46197	2.61953	0.008805	1
chr15	95169626	95170083	0	Exon (uc059not.1/uc059not.1, exon 3 of 3)	LINC01197	uc059nox.1	119402	1.0896	15.6816	2.61868	0.00882708	0.395411
chr1	84245995	84248162	0	Distal Intergenic	SAMD13	uc001djr.3	-50204	1.11093	229.86	2.61822	0.00883902	0.39549
chr16	15405293	15405520	0	Intron (uc002ddm.3/255027, intron 1 of 2)	MPV17L	uc059rea.1	9209	1.17605	7.57939	2.61804	0.00884355	1
chr4	10828970	10829286	0	Distal Intergenic	CLNK	uc003gmo.5	-144105	1.17733	7.61233	2.61766	0.00885339	1
chr7	34070888	34071103	0	Intron (uc011kap.2/168667, intron 12 of 15)	BMPER	uc064css.1	3656	1.15759	9.07206	2.61663	0.00888023	1
chr2	20601745	20602238	0	Intron (uc061gyz.2/64342, intron 5 of 5)	HS1BP3-IT1	uc032nge.1	-9197	1.16539	29.0383	2.61559	0.00890727	0.398086
chr4	174630041	174630242	0	Distal Intergenic	GLRA3	uc063bby.1	98456	0.765671	5.2682	2.61506	0.00892108	1
chr10	103990097	103990531	0	Intron (uc001kxo.2/9748, intron 1 of 18)	SLK	uc057vtt.1	-17667	1.30679	9.3417	2.61331	0.00896698	1
chr15	57431799	57432350	0	Intron (uc059jpm.1/84952, intron 2 of 2)	CGNL1	uc002aeg.3	55294	1.1755	25.8019	2.61306	0.00897363	0.399579
chr15	85164634	85165124	0	Distal Intergenic	PDE8A	uc059mtz.1	44443	1.20525	6.59025	2.61244	0.00898981	1
chr11	57652987	57653150	0	Intron (uc058bnq.1/10978, intron 1 of 1)	YPEL4	uc058bnh.1	-3043	1.3431	7.29963	2.6124	0.00899078	1
chr6	26233625	26235608	0	Promoter (<=1kb)	HIST1H1D	uc003nhd.4	0	1.00234	224.167	2.61235	0.00899229	0.399579
chr7	53811293	53811810	0	Promoter (<=1kb)	LINC01446	uc022adj.1	121	1.14292	15.5515	2.61222	0.00899551	0.399579
chr1	201449618	201450201	0	Distal Intergenic	PHLDA3	uc057oij.1	16456	1.18317	42.1925	2.61185	0.00900546	0.399579
chr2	61436084	61436387	0	Intron (uc002sbe.4/9736, intron 1 of 79)	SNORA70B	uc010fck.2	-18706	1.29248	8.53398	2.61165	0.00901051	1
chr7	104956661	104956854	0	Intron (uc064gst.1/uc064gst.1, intron 1 of 1)	LHFPL3-AS2	uc003vch.1	-30016	1.23209	19.4125	2.61119	0.00902278	0.399579
chr4	77629517	77630052	0	Distal Intergenic	CXCL13	uc062xoa.1	23685	1.24767	16.5528	2.60993	0.00905607	0.400103
chr19	2257842	2258115	0	Promoter (1-2kb)	JSRP1	uc002lvj.3	-1425	1.29646	5.94076	2.60976	0.00906066	1
chr1	224747280	224747556	0	Distal Intergenic	CNIH3	uc001hos.2	130987	1.23092	12.8265	2.60973	0.00906129	1
chr1	147998697	147998942	0	Intron (uc001eov.1/100034743, intron 6 of 8)	PDZK1P1	uc001eov.1	13157	1.16076	4.61349	2.60925	0.0090742	1
chrX	55710546	55710804	0	Distal Intergenic	RRAGB	uc004duq.4	-6935	1.28951	8.01506	2.60921	0.00907517	1
chr1	200351669	200352658	0	Intron (uc001gvd.1/554279, intron 4 of 4)	LINC00862	uc001gvd.1	21134	1.09324	45.0737	2.60853	0.00909321	0.400103
chr8	119990356	119990718	0	Intron (uc011lid.4/64798, intron 2 of 6)	DEPTOR	uc064pul.1	20568	1.24307	31.9134	2.60775	0.00911388	0.400103
chr1	35487700	35489000	0	Intron (uc001byx.4/79932, intron 3 of 20)	KIAA0319L	uc057esd.1	-16794	1.12536	62.1412	2.60756	0.00911914	0.400103
chr7	116805501	116805731	0	Distal Intergenic	CAPZA2	uc064hho.1	-5339	1.14867	19.8822	2.60745	0.00912195	0.400103
chr19	47099695	47099851	0	Intron (uc002pga.5/23211, intron 2 of 14)	ZC3H4	uc061akk.1	-5208	1.17556	11.3032	2.60711	0.00913092	1
chr4	7778923	7779473	0	Promoter (<=1kb)	AFAP1	uc062uzq.1	0	1.2277	28.2394	2.60709	0.00913166	0.400103
chr20	23622109	23622401	0	Distal Intergenic	CST3	uc002wtm.5	15544	1.29311	12.9423	2.60638	0.00915038	1
chrX	1259610	1259865	0	Distal Intergenic	CSF2RA	uc004cpo.3	-8935	0.879648	7.74293	2.60626	0.00915369	1
chr6	195479	196903	0	Intron (uc063liq.1/285766, intron 2 of 7)	LOC285766	uc063liq.1	8581	1.04554	62.2802	2.60622	0.00915471	0.400103
chr1	174416091	174416412	0	Intron (uc001gjw.4/9910, intron 13 of 13)	GPR52	uc001gka.2	-31699	1.07369	14.8244	2.60436	0.00920451	1
chr1	76255049	76255197	0	Intron (uc001dhh.3/256435, intron 1 of 4)	ST6GALNAC3	uc057hsm.1	-58603	0.981568	6.50127	2.60412	0.009211	1
chr10	6579018	6579336	0	Promoter (<=1kb)	PRKCQ	uc001ijj.3	965	1.24564	14.2237	2.60305	0.00923988	1
chr13	110611085	110611304	0	Distal Intergenic	NAXD	uc010tjk.3	-4156	1.29639	7.54924	2.60271	0.00924892	1
chr1	224541786	224542222	0	Intron (uc057pve.1/uc057pve.1, intron 2 of 5)	CNIH3	uc001hos.2	-74071	1.17381	56.8486	2.60222	0.00926216	0.403653
chr2	12398961	12399187	0	Intron (uc002rbu.3/100506457, intron 4 of 5)	MIR3681HG	uc061gtu.1	84644	1.12837	21.5613	2.60192	0.00927032	0.403653
chr12	76158501	76159331	0	Distal Intergenic	NAP1L1	uc001sxx.3	-73468	1.18793	37.5162	2.60106	0.00929375	0.404008
chr19	8193523	8193682	0	Intron (uc060ssp.1/1994, intron 2 of 7)	CERS4	uc060ste.1	-13054	1.22296	4.21586	2.60084	0.00929945	1
chr6	134267335	134267506	0	Intron (uc003qeo.4/6446, intron 1 of 13)	SGK1	uc063rod.1	-5276	1.24306	6.53144	2.60078	0.00930119	1
chr1	161185693	161186460	0	3' UTR	B4GALT3	uc001fyr.3	-7725	1.04839	74.9391	2.60065	0.00930462	0.404008
chr1	168584978	168585144	0	Distal Intergenic	XCL1	uc001gfo.2	8505	1.29765	7.72676	2.60064	0.00930494	1
chr15	57432538	57432933	0	Intron (uc059jpm.1/84952, intron 2 of 2)	CGNL1	uc002aeg.3	56033	1.21506	17.7796	2.60047	0.00930961	0.404008
chr3	177593320	177593502	0	Intron (uc031sch.3/100505566, intron 2 of 3)	LINC00578	uc062qcs.1	-24088	1.15356	12.0622	2.60011	0.00931935	1
chrX	134337990	134338471	0	Distal Intergenic	PHF6	uc004exj.4	-34782	1.13578	8.46782	2.59909	0.00934709	1
chr10	4033421	4033831	0	Distal Intergenic	LOC101927964	uc001ihc.1	-17895	1.27723	11.6979	2.59887	0.0093531	1
chrX	121000014	121000362	0	Distal Intergenic	CT47A10	uc004etn.5	-14226	1.24664	7.71696	2.59833	0.00936791	1
chrX	40952710	40953350	0	Distal Intergenic	USP9X	uc004dfc.4	-132285	1.23228	21.2938	2.59819	0.00937156	0.405341
chr20	53612037	53612612	0	Intron (uc061xuw.1/105372672, intron 1 of 2)	LOC105372672	uc061xuw.1	3683	1.21762	46.5796	2.5965	0.00941776	0.405837
chr6	128491448	128492097	0	Promoter (<=1kb)	PTPRK	uc063rgm.1	0	1.1825	18.6267	2.59646	0.00941888	0.405837
chr12	109110237	109110988	0	3' UTR	ACACB	uc001tob.4	-5607	1.21617	53.7648	2.59625	0.00942475	0.405837
chr11	59707203	59707359	0	Distal Intergenic	STX3	uc058bru.1	-6097	1.14455	7.57083	2.59561	0.00944223	1
chr14	61323225	61323397	0	Promoter (<=1kb)	PRKCH	uc059cfm.1	561	1.24619	12.3854	2.59417	0.009482	1
chr11	72329022	72329494	0	Intron (uc001osj.5/81570, intron 7 of 16)	CLPB	uc058fay.1	-20438	1.22175	13.8873	2.59301	0.009514	1
chrX	44407038	44407316	0	Distal Intergenic	EFHC2	uc004dgb.5	-63366	0.944319	6.68004	2.59217	0.0095374	1
chr6	97097135	97097980	0	Intron (uc003poz.2/114792, intron 5 of 8)	KLHL32	uc063qee.1	32507	1.21553	20.6955	2.59173	0.00954949	0.407707
chr22	29153228	29153450	0	Intron (uc011akm.2/83999, intron 9 of 9)	KREMEN1	uc062cwc.1	11198	1.23431	19.5022	2.59138	0.00955923	0.407707
chr21	29193317	29194048	0	Promoter (<=1kb)	LINC00189	uc061zky.1	0	1.20634	69.5112	2.58974	0.00960478	0.407707
chr5	149941745	149942089	0	Promoter (2-3kb)	PDE6A	uc063ipf.1	2704	1.16452	17.0171	2.58866	0.00963512	0.407707
chr17	22322902	22323335	0	Distal Intergenic	FAM27E5	uc060ctm.1	23527	1.02013	16.0264	2.58851	0.00963918	0.407707
chr15	90165185	90165785	0	Intron (uc059ndl.1/10509, intron 1 of 3)	SEMA4B	uc059ndl.1	4581	1.0171	36.5735	2.58847	0.00964031	0.407707
chr1	168920592	168921587	0	Intron (uc031vdt.1/101978719, intron 3 of 4)	LINC00626	uc001gfq.4	133653	1.23165	31.7537	2.58832	0.00964459	0.407707
chr15	98859252	98859433	0	Intron (uc002bul.4/3480, intron 2 of 20)	IGF1R	uc059nsf.1	-14286	1.22319	18.1167	2.58787	0.00965701	0.407707
chr8	6547122	6547268	0	Intron (uc003wqi.4/79648, intron 12 of 13)	ANGPT2	uc010lri.5	15776	1.33734	5.92268	2.58761	0.00966448	1
chr10	98367243	98367833	0	Distal Intergenic	PYROXD2	uc057vha.1	20603	0.867469	53.7147	2.58738	0.00967092	0.407707
chr15	44726447	44726628	0	Promoter (2-3kb)	TRIM69	uc001zuf.3	-2360	0.960296	33.552	2.58655	0.00969422	0.407707
chr18	59885326	59886751	0	Distal Intergenic	PMAIP1	uc002lic.3	-13197	0.993222	74.9711	2.58573	0.00971718	0.407707
chr16	79767970	79768745	0	Promoter (1-2kb)	MAFTRR	uc059xll.1	1556	1.18854	43.0304	2.58565	0.00971953	0.407707
chrX	55109798	55110017	0	Distal Intergenic	PAGE2	uc064znz.1	20662	1.32573	5.47045	2.58535	0.00972812	1
chr4	3538750	3539605	0	Distal Intergenic	LRPAP1	uc003ghh.5	-6191	0.568638	21.4114	2.58507	0.00973592	0.407723
chr6	31946049	31946411	0	Promoter (<=1kb)	CFB	uc063njr.1	0	1.22515	12.1059	2.58454	0.00975077	1
chr7	106064169	106064372	0	Distal Intergenic	SYPL1	uc064gvn.1	28880	1.14384	12.6923	2.5845	0.00975206	1
chr6	766872	767504	0	Intron (uc063ljm.1/uc063ljm.1, intron 1 of 2)	EXOC2	uc063ljj.1	-73761	1.23733	15.7643	2.58261	0.00980572	0.408243
chr6	48110325	48110714	0	Distal Intergenic	PTCHD4	uc011dwm.2	-41636	1.10049	11.7583	2.58189	0.00982598	1
chr7	129259544	129260115	0	Intron (uc011kov.3/23382, intron 1 of 16)	AHCYL2	uc003vot.4	34494	1.26679	10.6557	2.58094	0.00985305	1
chr1	157734989	157735140	0	Distal Intergenic	FCRL2	uc057mez.1	32634	1.32228	7.87014	2.5807	0.00985996	1
chr18	50424907	50425281	0	Distal Intergenic	SKA1	uc060pei.1	49846	1.01597	5.48626	2.58068	0.00986048	1
chr2	231190294	231190939	0	Distal Intergenic	ARMC9	uc002vrq.6	-7607	1.20178	32.2086	2.58024	0.00987306	0.410608
chr6	129489429	129489575	0	Promoter (1-2kb)	LAMA2	uc063rhb.1	-1108	1.23681	12.7445	2.5797	0.00988853	1
chr3	69786926	69787137	0	Intron (uc003dnz.4/4286, intron 1 of 9)	MITF	uc003doa.3	23115	1.2493	12.7564	2.57955	0.00989295	1
chr12	3885054	3886054	0	Intron (uc058jyb.1/uc058jyb.1, intron 1 of 1)	PARP11	uc001qmn.3	-11606	1.13541	33.131	2.57943	0.00989633	0.411019
chr15	94020820	94020984	0	Intron (uc059nnu.1/uc059nnu.1, intron 2 of 4)	LINC01581	uc059nod.1	78366	1.08099	9.05477	2.57932	0.00989957	1
chr17	11852960	11853795	0	Promoter (<=1kb)	DNAH9	uc060bhv.1	0	1.22348	33.9813	2.57916	0.00990407	0.411019
chr5	123617482	123617639	0	Distal Intergenic	CSNK1G3	uc063gly.1	29057	0.973463	3.21173	2.57892	0.00991087	1
chr11	116853913	116854201	0	Intron (uc058hrd.1/104326055, intron 1 of 1)	SIK3	uc058hrf.1	-4775	1.14777	15.0259	2.57857	0.00992091	0.411279
chr7	149439965	149440411	0	Intron (uc003wfv.4/27153, intron 4 of 5)	ZNF777	uc003wfv.4	20712	1.28457	8.38549	2.57803	0.00993642	1
chrX	43868363	43868941	0	Intron (uc004dfz.5/4129, intron 1 of 14)	MAOB	uc064yrn.1	13362	1.1927	13.6552	2.57741	0.00995446	1
chr19	49716670	49717199	0	Distal Intergenic	CPT1C	uc061biy.1	3677	1.08567	21.8748	2.57707	0.00996431	0.412639
chr10	45709740	45710137	0	Distal Intergenic	WASHC2C	uc010qfi.3	-17063	1.27609	6.80085	2.57663	0.00997678	1
chr6	24742748	24743437	0	Intron (uc063mek.1/uc063mek.1, intron 1 of 2)	C6orf62	uc003nel.5	-21912	1.11716	45.4521	2.57636	0.00998454	0.413038
[truncated: 80,470 more rows]

[truncated: 2 more sheets: ChIPseq_Cistrome-GO, ChIPseq_Toolkit]
