# Supplementary material for: Therapeutically Increasing MHC-I Expression Potentiates Immune Checkpoint Blockade
Source: Oxford University Press journal article supplement (doi:10.1158/2159-8290.cd-20-0812), 2021-02-15
Supplement: 21598290cd200812-sup-244871_3_supp_6826079_qmj3gs.xlsx [file 21598290cd200812-sup-244871_3_supp_6826079_qmj3gs.xlsx]

## Sheet: Sheet1
	HLA-A	HLA-B	HLA-C	B2M	TAP1	CD274	PDCD1LG2
GSE100169_H1417_T3775440	-0.476395	-0.530531	-0.556494	0.453537	0.733055	0.11561	0.11561
GSE100169_H510_T3775440	-0.281207	-0.0757473	-0.066757	0.484653	0.768614	0.113898	0.113898
GSE100169_H526_T3775440	-0.522633	-0.225874	-0.198683	0.285902	-0.0924788	0.115692	0.115692
GSE102483_TF1a_Etoposide	0.589644	0.107771	0.42818	0.0959846	0.215886	0.169665	0.208433
GSE102483_TF1a_Rapamycin	0.0188772	-0.493217	0.228854	0.067269	0.139024	-0.243316	0.183785
GSE102483_TF1a_TGFB1	0.109235	-0.23612	0.257886	0.112744	0.204414	0.213876	0.16474
GSE102483_TF1a_TGFB1+Rapamycin	0.424732	-0.0146248	0.173148	0.0841923	0.209962	0.108242	0.126038
GSE102639_A549_AZD1132	0.713419	1.10826	0.779462	0.739398	0.853716	0.957311	0.236345
GSE102639_A549_Etoposide	0.876505	1.151	0.887096	0.990973	0.374013	0.194834	0.258053
GSE102639_A549_MLN8237	0.711031	1.1349	0.781404	0.754953	0.805146	0.958462	0.329711
GSE102639_A549_VX680	0.618906	1.08393	0.671514	0.596164	0.757146	0.915671	0.538456
GSE104664_HUVEC_h2o2.16h	0.326481	0.521149	0.296027	-0.138654	1.02862	0.00573285	0.0748001
GSE104664_HUVEC_h2o2.36h	0.264082	0.309454	0.343297	-0.121235	0.555731	0.0132574	0.0729702
GSE105065_HepG2_SGI-110.D10	0.687279	1.63259	0.585784	0.27077	-0.0846121	0.203711	0.138144
GSE105065_HepG2_SGI-110.D17	0.487351	1.25124	0.411045	0.234976	0.070364	0.153955	0.239839
GSE105065_HepG2_SGI-110.D24	0.510378	1.35588	0.576669	0.47263	0.0296795	-0.00260137	0.10029
GSE105065_HepG2_SGI-110.D3	0.507421	0.516505	0.192294	-0.215128	-0.231996	0.192365	0.131595
GSE105065_SNU398_SGI-110.D10	0.281721	0.815366	0.329879	0.405663	0.671514	-0.0395939	0.231747
GSE105065_SNU398_SGI-110.D17	-0.01467	-0.119711	-0.0121972	0.00799063	0.348582	0.127722	0.208395
GSE105065_SNU398_SGI-110.D24	-0.517535	-0.048677	0.0699812	0.0992022	0.177836	-0.024695	0.111029
GSE105065_SNU398_SGI-110.D3	-0.0814604	-0.0458835	-0.132317	-0.395917	0.225391	0.0131062	0.104419
GSE105065_SNU475_SGI-110.D10	1.03289	1.32063	1.09373	0.688971	0.835398	-0.261067	0.139695
GSE105065_SNU475_SGI-110.D17	0.652126	1.26949	0.937411	0.770423	0.885389	-0.271379	0.362794
GSE105065_SNU475_SGI-110.D24	0.680133	1.46455	1.08797	0.689979	0.857836	-0.137136	0.196077
GSE105065_SNU475_SGI-110.D3	0.899718	0.904852	0.695878	0.420796	0.504764	-0.61342	0.581272
GSE105065_SNU475_SGI-110.D31	0.0880283	1.20263	0.946629	0.555573	0.534413	-0.214395	0.238194
GSE105065_SNU475_SGI-110.D56	0.182812	0.414917	0.553108	0.183539	0.176354	-0.115174	0.366692
GSE107354_NB39nu_Alectinib	0.0125016	-0.0928467	-0.105059	0.035438	-0.0587905	0.117642	0.739807
GSE107354_NB39nu_Crizotinib	0.131616	0.00281198	-0.0436476	0.0637027	-0.0514708	0.0351007	0.6586
GSE107354_NB39nu.R_Alectinib	-0.0674512	-0.275127	-0.274364	-0.00101382	-0.142671	0.122972	0.00179262
GSE107354_NB39nu.R_Crizotinib	-0.11423	-0.264763	-0.264402	-0.103808	-0.161975	0.317527	-0.279518
GSE107912_EVSAT.siCtrl_BV6	0.12441	0.127312	-0.126204	0.641682	0.44973	-0.274608	-0.291134
GSE107912_EVSAT.TNFR1_BV6	0.11228	0.114372	-0.0438534	0.588842	0.310512	-0.0859541	-0.248951
GSE107912_MDA.IRF1_BV6	0.670019	0.644058	0.120419	1.08992	0.589268	0.165704	-0.0478497
GSE107912_MDA.none_BV6	0.655781	0.604048	0.117922	1.11018	0.619379	0.119343	0.071772
GSE107912_MDA.RELA_BV6	0.801367	0.757146	0.143451	1.17166	0.627634	0.114449	-0.292749
GSE107912_MDA.siCtrl_BV6	0.769068	0.770423	0.138719	1.16371	0.75668	0.117535	0.109606
GSE107912_MDA.TNFR1_BV6	0.789783	0.841804	0.146652	1.17661	0.72648	0.11879	0.110171
GSE108265_RKO_NCD38	0.651588	0.537365	0.733853	0.356355	0.458572	0.643262	-0.122561
GSE108265_RKO_P4.NCD38	0.150832	0.2654	0.179902	0.801904	-0.155327	0.581854	0.395021
GSE108265_RKO_PIPP.NCD38	-0.0392498	0.287955	-0.0965336	0.853716	-0.149196	0.670019	0.405387
GSE110397_8988T_Palbociclib	0.622899	1.20564	0.869732	0.54567	0.810757	0.51009	0.423605
GSE110397_8988T_Palbociclib+Trametinib	0.911084	1.3957	1.09175	0.798086	1.1324	0.263989	0.621275
GSE110397_8988T_Trametinib	0.855717	1.37746	1.03436	0.796396	1.06283	0.448873	0.341251
GSE110397_A549_Palbociclib	0.620555	0.631761	0.731074	0.533809	0.3973	0.758934	0.379896
GSE110397_A549_Palbociclib+Trametinib	0.733055	1.1349	0.910203	0.755796	0.702864	0.489708	0.499904
GSE110397_A549_Trametinib	0.713101	1.1349	0.945518	0.822399	0.652638	0.286737	0.112906
GSE110397_H2030_Palbociclib	0.477755	0.625145	0.481402	0.513261	1.23396	0.580473	0.531058
GSE110397_H2030_Palbociclib+Trametinib	0.958462	1.11465	1.06121	0.951942	1.19679	-0.0762469	0.574536
GSE110397_H2030_Trametinib	0.891788	1.06121	0.999939	0.918467	1.34521	0.313586	0.581854
GSE110397_H460_Palbociclib	0.623155	0.557859	0.447445	0.242491	-0.0376988	0.22864	0.442925
GSE110397_H460_Palbociclib+Trametinib	0.498429	0.719827	0.547565	0.248343	0.051133	-0.622956	0.0354721
GSE110397_H460_Trametinib	0.751093	1.37746	1.02153	0.758474	0.235756	-0.706749	-0.213032
GSE110397_Mia_Palbociclib	0.778996	1.94343	1.5675	0.788325	0.806778	0.578856	0.113042
GSE110397_Mia_Palbociclib+Trametinib	0.575148	1.59128	1.22736	0.721997	0.864799	1.08221	0.390122
GSE110397_Mia_Trametinib	0.534567	1.71736	1.41445	0.713101	0.789328	0.212895	0.113044
GSE110397_PANC-1_Palbociclib	0.931596	1.52597	1.12118	1.32546	0.969607	0.482629	0.336812
GSE110397_PANC-1_Palbociclib+Trametinib	0.78883	1.15612	0.926699	0.933519	0.863461	0.531058	0.748552
GSE110397_PANC-1_Trametinib	0.846974	1.36082	1.10826	1.00774	0.929658	0.631986	0.206522
GSE111305_Adipocyte_Guadecitabine	0.22548	-0.139487	-0.0635995	0.0145782	0.0195771	-0.0819221	-0.12095
GSE112371_PEO1.R.PDX_Saracatinib	0.647424	0.90845	0.488932	0.985911	0.590682	-0.19791	-0.0919932
GSE112371_PEO1.R.PDX_Selumetinib	0.397388	0.892513	0.714489	0.842449	0.627159	-0.0929014	-0.0434914
GSE112371_PEO1.R.PDX_Selumetinib+Saracatinib	0.664402	0.691245	0.381752	0.841181	0.37826	-0.0924201	0.0366603
GSE129071_MHCC97L_Oxaliplatin	0.790269	1.01607	0.769068	0.573784	0.610747	-0.0579499	0.0759677
GSE129071_MHCC97L_Saracatinib	0.894155	1.04951	0.777097	0.652387	0.652946	-0.0509998	-0.0135415
GSE15781_CRC.Normal_Radiochemotherapy	0.114416	0.517964	0.114416	0.0752265	0.309336	0.302888	0.333603
GSE15781_CRC.Patient_Radiochemotherapy	0.11532	0.0866159	0.11532	0.203019	-0.0519263	0.0822463	-0.0281604
GSE28645_LY2_Tamoxifen	-0.0910302	-0.0345353	0.147478	0.690927	-0.463579	0.13435	-0.154644
GSE31019_HT1080_IFN	0.11824	0.11824	1.29333	1.06631	1.46455	0.48364	1.11018
GSE31019_HT1080_IFN+U0126	0.117122	0.117122	1.20861	0.824819	1.36082	-0.994261	-0.543147
GSE31019_HT1080_U0126	0.115218	0.115218	0.464886	0.277899	0.637036	-1.2081	-0.887823
GSE31019_SKOV3_IFN	0.131797	0.131797	0.396424	0.379441	1.11899	1.41445	1.47254
GSE31057_HDLM2_Perifosine	-0.938714	-0.0171846	-0.0292919	0.101431	-0.0317545	0.400754	0.242767
GSE31057_HDLM2_Perifosine+Sorafenib	0.363688	-0.0543999	0.0948331	0.161173	0.329946	-0.707682	0.294712
GSE31057_HDLM2_Sorafenib	-0.0827385	0.282799	0.134271	0.100009	-0.0434422	-0.388045	0.345939
GSE31058_HD-MyZ_Perifosine	0.584427	0.0190978	0.258657	0.215447	0.579445	0.278208	-0.0597541
GSE31058_HD-MyZ_Perifosine+Sorafenib	0.689632	0.340664	0.266049	0.400594	0.385178	-0.450329	0.184574
GSE31058_HD-MyZ_Sorafenib	0.433419	0.289444	0.336156	0.0738994	0.353897	-0.252655	-0.0903854
GSE31059_L540_Perifosine	0.428371	0.0530797	-0.00908348	0.421738	-0.399219	-0.443332	-0.0878369
GSE31059_L540_Perifosine+Sorafenib	0.810757	0.867576	0.656605	0.596368	0.93061	-0.386586	0.0613556
GSE31059_L540_Sorafenib	1.09964	0.659438	0.64637	0.713758	0.743988	-0.490947	0.0725833
GSE33366_MCF7_BMS-754807	0.434849	0.550854	0.333183	0.2604	0.302024	0.114121	0.227574
GSE33366_MCF7_Letrozole	0.835398	1.07493	0.219264	0.720168	1.28932	0.114546	0.330571
GSE33366_MCF7_Letrozole+BMS-754807	0.387856	0.82362	0.315594	0.49314	0.972968	0.114436	0.495026
GSE33366_MCF7_Tamoxifen	0.566739	0.802446	0.224746	0.462931	0.6782	0.115414	0.294486
GSE33366_MCF7_Tamoxifen+BMS-754807	0.638585	0.845005	0.286931	0.575516	0.686643	0.115602	0.232598
GSE33624_MelJuSo_Doxorubicin	0.584236	0.115963	0.585994	0.355564	0.951942	0.115963	0.115963
GSE33624_MelJuSo_Etoposide	0.683483	0.115377	0.649043	0.35128	0.735001	0.115377	0.115377
GSE33624_SW620_Doxorubicin	0.414076	0.11534	0.741861	0.554511	0.693876	0.11534	0.11534
GSE33624_SW620_Etoposide	0.327626	0.116494	0.565807	0.418467	0.645868	0.116494	0.116494
GSE33827_MDAMB231.T2_SM164	1.32546	1.15858	1.15612	1.24762	0.451907	0.346499	0.10692
GSE33827_MDAMB231.T3_SM164	1.28932	1.10193	1.11899	1.24762	0.417889	0.343082	0.105704
GSE33827_MDAMB231.T6_SM164	1.32063	1.16125	1.14653	1.25124	0.450801	0.348725	0.108221
GSE33827_MDAMB231.T8_SM164	1.31075	1.1349	1.13009	1.23697	0.447445	0.343632	0.107907
GSE34228_PC9_EGF	0.145662	0.0841307	0.000600006	0.0968392	0.000184108	1.73739	1.31075
GSE34228_PC9_EGF+Gefitinib	0.298867	0.269964	0.220625	0.23602	0.0987526	-1.44509	-0.788827
GSE34228_PC9_Gefitinib	0.275021	0.293202	0.152343	0.277699	0.0697499	-1.44509	-0.763757
GSE34228_PC9GRM2_EGF	0.275982	0.0695951	-0.0106542	-0.045725	0.123569	1.83364	2.10538
GSE34228_PC9GRM2_EGF+Gefitinib	0.468408	0.434529	0.310213	0.301855	0.252978	-1.59597	-0.486498
GSE34228_PC9GRM2_Gefitinib	0.443882	0.432806	0.294652	0.294486	0.208471	-1.86674	-0.512747
GSE35230_A375_GSK212.10nM	0.353392	0.166616	0.369424	0.138789	0.199722	0.106729	0.310995
GSE35230_A375_GSK212.10nM+GSK436.0.1uM	0.340472	0.293253	0.431135	0.230354	0.0899026	-0.201643	0.612383
GSE35230_A375_GSK212.10nM+GSK436.1uM	0.397388	0.155253	0.38569	0.094901	0.187118	-0.132026	0.0522321
GSE35230_A375_GSK212.30nM	0.315234	0.212406	0.345345	0.243	0.0936766	-0.356706	0.158889
GSE35230_A375_GSK436.0.1uM	0.365547	0.0295813	0.341864	0.0744029	0.196557	0.202626	0.656071
GSE35230_A375_GSK436.1uM	0.376814	0.138815	0.308745	-0.00690144	0.163387	0.145066	0.548469
GSE35230_A375.R_GSK212.10nM	0.239143	0.192519	0.386019	0.25178	0.237802	-0.381789	-0.381952
GSE35230_A375.R_GSK212.10nM+GSK436.0.1uM	0.240431	0.386019	0.4292	0.276591	0.224577	-0.379894	-0.498098
GSE35230_A375.R_GSK212.10nM+GSK436.1uM	0.19479	0.335888	0.50796	0.271542	0.313093	-0.531863	-0.271911
GSE35230_A375.R_GSK212.30nM	0.256265	0.315777	0.423081	0.220743	0.322816	-0.46808	-0.0833682
GSE35230_A375.R_GSK436.0.1uM	0.254609	0.251265	0.1676	0.0605884	0.0527731	0.0171758	0.413144
GSE35230_A375.R_GSK436.1uM	0.136079	0.305138	0.223732	0.288062	0.0133988	-0.0916414	-0.135424
GSE38310_ER3_Erlotinib	0.0937309	-0.290693	0.2239	0.265068	0.303284	-0.4826	0.129429
GSE38310_HCC827_Erlotinib	0.542341	0.583212	0.392168	0.395358	0.367764	-0.0441001	0.139487
GSE38310_T15-2_Erlotinib	-0.521264	-0.133857	0.311227	0.0979078	0.861357	0.0726627	0.689979
GSE38823_HSC3_Decitabine	-0.480764	0.113603	0.0775231	-0.161883	-0.473995	0.642209	0.747741
GSE38823_OC3_Decitabine	0.434128	0.123843	0.213143	0.245635	0.666449	0.41944	0.438003
GSE38823_SAS_Decitabine	0.00872251	0.117958	-0.000538977	0.413237	0.601591	0.0620396	-0.497814
GSE38823_SCC-15_Decitabine	0.0132574	0.117802	0.274032	0.172863	0.209773	-0.557679	0.194146
GSE39691_TNBC_Sirolimus	0.236701	0.0699812	0.0732758	-0.277015	0.445896	0.455698	0.134965
GSE39693_BreastTumor_Everolimus	0.143747	0.518702	0.0440152	0.402334	-0.0532214	-0.394567	-0.0529081
GSE40512_KOPTK1_Palbociclib	0.374545	0.313035	0.316915	0.090213	0.191296	-0.0352157	0.225825
GSE40837_BRCA_Sorafenib	0.0242545	0.22378	0.28967	0.172489	0.26521	0.0756861	0.114116
GSE41816_BT549_AZD6244.24h	0.113768	0.113768	0.113768	0.718547	0.113768	0.113768	0.113768
GSE41816_BT549_AZD6244.4h	0.113605	0.113605	0.113605	-0.280626	0.113605	0.113605	0.113605
GSE41816_BT549_siDUSP4	0.113384	0.113384	0.113384	0.482566	0.113384	0.113384	0.113384
GSE41816_MDA231_AZD6244.24h	0.113549	0.113549	0.113549	0.54309	0.113549	0.113549	0.113549
GSE41816_MDA231_AZD6244.4h	0.113432	0.113432	0.113432	0.732412	0.113432	0.113432	0.113432
GSE41816_MDA231_siDUSP4	0.11361	0.11361	0.11361	0.816262	0.11361	0.11361	0.11361
GSE41816_SUM159PT_AZD6244.24h	0.113698	0.113698	0.113698	-0.420271	0.113698	0.113698	0.113698
GSE41816_SUM159PT_AZD6244.4h	0.113395	0.113395	0.113395	0.516135	0.113395	0.113395	0.113395
GSE41816_SUM159PT_siDUSP4	0.113776	0.113776	0.113776	-0.52074	0.113776	0.113776	0.113776
GSE43510_DHL4_R406.24h	0.541851	0.644817	0.535719	0.395973	0.48749	0.352883	-0.00936573
GSE43510_DHL4_R406.6h	0.399987	-0.0663319	0.00711302	0.371331	0.299249	0.152998	0.0953182
GSE43510_DHL6_R406.24h	0.642209	0.391212	0.606917	0.0787252	0.196591	0.158086	-0.0323345
GSE43510_DHL6_R406.6h	0.596582	-0.0985398	0.05795	0.0984169	0.225867	0.160053	0.347949
GSE43510_HBL-1_R406.24h	0.322506	0.0168775	0.244414	0.324955	-0.293339	-0.622956	0.405197
GSE43510_HBL-1_R406.6h	0.153374	-0.000615009	0.0736417	0.0703312	-0.59859	-0.887823	0.213584
GSE43510_LY7_R406.24h	0.456265	0.390542	0.497464	0.233052	0.362135	0.404285	0.0431537
GSE43510_LY7_R406.6h	0.34	0.0918362	0.354114	0.29992	0.248201	0.504903	-0.00478992
GSE43510_U2932_R406.24h	0.198888	-0.0750131	-0.0174086	0.396424	-0.262251	0.475781	0.162722
GSE43510_U2932_R406.6h	0.503788	0.221039	-0.476124	0.142939	0.0343192	0.269871	-0.276631
GSE45626_NCI-H526_CDDP.day1	0.094416	0.133564	0.19728	0.542005	0.0579213	0.378023	0.216147
GSE45626_NCI-H526_R1507.day1	0.378426	0.459038	0.42818	0.485265	0.0920514	0.0367982	0.179032
GSE45626_NCI-H526_R1507.day7	0.0906562	-0.539062	0.0618979	0.236367	-0.0853704	0.0704356	0.322085
GSE45626_NCI-H526_Radiation.day1	0.081076	-0.147041	0.0407167	0.535058	0.0242205	-0.0160112	0.127193
GSE45626_NCI-H526_Radiation.day7	0.122248	-0.210158	0.198179	0.2131	0.0252663	0.074671	0.0820644
GSE45891_Cal27_Erlotinib	0.993461	1.48129	0.955069	0.587006	0.208471	0.0555037	-0.120324
GSE45891_FADU_Erlotinib	0.414076	0.746494	0.198143	0.554347	0.138099	0.192722	0.00931314
GSE45891_SQ20B_Erlotinib	0.38709	1.23396	0.678832	0.505456	0.320727	-0.00478992	0.121647
GSE48399_Raji_NaB	0.269657	0.25803	0.129807	0.0493513	0.136897	-0.565616	0.274245
GSE48399_Raji_VP16	0.0229261	-0.0671876	-0.0869548	0.0698326	0.187763	-0.630508	-0.0409019
GSE48399_Raji_VP16+NaB	0.0198801	0.0577661	0.0478256	0.197736	0.0378836	-0.390701	0.0450731
GSE49284_Raji_EPZ6438.D2.high	0.7166	1.11239	0.988489	0.303113	0.852395	0.262332	-0.119167
GSE49284_Raji_EPZ6438.D2.low	0.636781	0.935525	0.891054	0.273878	0.926699	-0.00264597	0.0646297
GSE49284_Raji_EPZ6438.D4.high	0.76677	1.13941	1.02153	0.529916	0.910203	-0.046763	0.32307
GSE49284_Raji_EPZ6438.D4.low	0.75668	1.03289	0.985911	0.495164	0.863461	0.0596108	0.0893626
GSE49284_Raji_EPZ6438.D6.high	0.751499	1.151	1.09175	0.475059	0.713101	-0.131809	0.0720042
GSE49284_Raji_EPZ6438.D6.low	0.883115	1.11465	1.20861	0.443557	0.833398	0.0287194	0.00888836
GSE49414_TPC1_RPI1	0.492089	0.327247	0.581459	0.6274	0.309394	-0.0998136	0.0873374
GSE50516_Mammospheres_Shp2i	0.114245	0.114245	0.114245	0.662477	0.656899	0.624884	-0.846621
GSE50516_Mammospheres_Shp2ko	0.112167	0.112167	0.112167	0.336481	-0.113691	-0.142671	0.222366
GSE50791_Colo205_PLX4720	0.412595	0.696554	-0.425569	0.308579	0.49435	0.0664074	-0.23465
GSE50791_HT29_PLX4720	0.259872	-0.610736	0.108718	0.347608	-0.645979	0.19611	0.00958587
GSE51068_OCI-LY3_Aclacinomycin A.12h.0.036uM	-0.0136052	0.201749	-0.283108	0.00191421	0.150587	0.303507	-0.0447638
GSE51068_OCI-LY3_Aclacinomycin A.12h.0.105uM	0.304378	0.0949933	0.188198	0.161525	0.207507	-0.266599	0.151918
GSE51068_OCI-LY3_Aclacinomycin A.24h.0.036uM	-0.279518	0.158863	0.0625751	0.149025	0.0341169	0.239839	0.0249467
GSE51068_OCI-LY3_Aclacinomycin A.24h.0.105uM	0.0702528	0.157179	-0.390548	0.145166	0.133709	0.258657	0.47541
GSE51068_OCI-LY3_Aclacinomycin A.6h.0.036uM	-0.0580539	0.0866159	0.0155084	0.420989	-0.0571304	-0.56359	0.175831
GSE51068_OCI-LY3_Aclacinomycin A.6h.0.105uM	0.2983	0.0151362	0.305897	0.375967	-0.0428435	-1.03162	-0.133931
GSE51068_OCI-LY3_Blebbistatin.12h.100uM	0.158889	0.0318111	0.180832	0.100751	0.0668593	0.0259897	0.0194293
GSE51068_OCI-LY3_Blebbistatin.12h.10uM	0.209204	0.054291	0.0914157	0.172968	0.0641	-0.502873	0.0373499
GSE51068_OCI-LY3_Blebbistatin.24h.100uM	0.0915312	0.182469	-0.233024	0.0851256	0.43443	-0.094325	0.175895
GSE51068_OCI-LY3_Blebbistatin.24h.10uM	-0.386263	0.132452	-0.0522748	0.209204	-0.162059	-0.225196	0.632468
GSE51068_OCI-LY3_Blebbistatin.6h.100uM	-0.00247852	0.0715968	0.0193181	0.256088	0.313346	-0.610736	0.043745
GSE51068_OCI-LY3_Blebbistatin.6h.10uM	0.0313206	0.0698584	0.102336	0.292308	0.0619266	-0.770765	-0.448033
GSE51068_OCI-LY3_Camptothecin.12h.0.01uM	0.242171	0.153246	-0.137285	0.133293	0.24342	0.224234	0.144834
GSE51068_OCI-LY3_Camptothecin.12h.0.31uM	0.163595	0.204843	-0.112087	0.031705	0.596582	0.412682	0.194632
GSE51068_OCI-LY3_Camptothecin.24h.0.01uM	0.0975562	0.313346	-0.109933	0.0998272	0.456035	0.405291	0.308519
GSE51068_OCI-LY3_Camptothecin.24h.0.31uM	0.402594	0.200774	0.0442072	0.201156	0.400932	0.770892	0.294486
GSE51068_OCI-LY3_Camptothecin.6h.0.01uM	0.0111224	0.140629	-0.22039	0.0895859	0.318714	-0.62243	-0.060334
GSE51068_OCI-LY3_Camptothecin.6h.0.31uM	0.245727	0.134965	0.152617	0.138458	0.472136	0.318159	0.127643
GSE51068_OCI-LY3_Cycloheximide.12h.0.264uM	0.304084	0.191813	0.177596	0.129991	0.140059	0.170749	0.575338
GSE51068_OCI-LY3_Cycloheximide.12h.5uM	0.194944	0.270871	0.0261364	0.0639603	0.54468	0.289725	0.145166
GSE51068_OCI-LY3_Cycloheximide.24h.0.264uM	0.251827	0.312727	-0.0892158	0.0290029	-0.0232546	0.148585	0.147453
GSE51068_OCI-LY3_Cycloheximide.24h.5uM	0.451137	0.123263	0.544357	0.283006	0.125332	-0.0430365	0.1676
GSE51068_OCI-LY3_Cycloheximide.6h.0.264uM	0.153295	0.159819	-0.206253	0.142399	0.299131	-0.370338	0.15186
GSE51068_OCI-LY3_Cycloheximide.6h.5uM	0.216147	0.165272	-0.0982971	0.102831	0.517964	0.332246	0.191449
GSE51068_OCI-LY3_Doxorubicin hydrochloride.12h.0.03uM	0.0416008	0.137529	-0.128928	0.0679027	0.200267	0.277497	-0.127927
GSE51068_OCI-LY3_Doxorubicin hydrochloride.12h.0.101uM	0.268799	0.0819599	0.477755	0.136655	0.248842	-0.0211789	0.230692
GSE51068_OCI-LY3_Doxorubicin hydrochloride.24h.0.03uM	-0.0219887	0.14905	0.181306	0.167116	0.568782	0.613799	-0.024914
GSE51068_OCI-LY3_Doxorubicin hydrochloride.24h.0.101uM	0.24286	0.288115	0.213179	0.195779	0.542005	0.328679	0.0504393
GSE51068_OCI-LY3_Doxorubicin hydrochloride.6h.0.03uM	0.0734694	0.153927	0.0488865	0.275575	0.215611	-0.195973	-0.518228
GSE51068_OCI-LY3_Doxorubicin hydrochloride.6h.0.101uM	0.184681	0.202017	-0.293491	0.193885	0.32118	-0.383019	-0.146878
GSE51068_OCI-LY3_Etoposide.12h.0.811uM	-0.221621	0.156799	-0.129071	-0.0606982	0.357218	0.325453	0.22548
GSE51068_OCI-LY3_Etoposide.12h.0.812uM	0.289444	0.0968751	0.182894	0.146208	0.259399	-0.444024	1.5169
GSE51068_OCI-LY3_Etoposide.24h.0.811uM	0.269657	0.14247	0.441843	0.183039	0.562926	-0.0790862	0.373548
GSE51068_OCI-LY3_Etoposide.24h.0.812uM	0.0469636	0.289776	-0.0888546	0.0686291	0.592781	0.594895	0.223063
GSE51068_OCI-LY3_Etoposide.6h.0.811uM	0.176555	0.0978708	-0.416315	0.0923515	0.695515	-0.256663	0.042555
GSE51068_OCI-LY3_Etoposide.6h.0.812uM	0.0732038	0.148609	-0.290267	0.0845475	0.524958	-0.231473	0.0135104
GSE51068_OCI-LY3_Geldanamycin.12h.0.001uM	-0.257141	-0.831474	-0.0694489	-0.0500491	-0.522991	0.04671	0.196
GSE51068_OCI-LY3_Geldanamycin.12h.0.032uM	0.0623455	0.0974131	-0.0962189	0.0433166	-0.490947	-0.383194	-0.245171
GSE51068_OCI-LY3_Geldanamycin.24h.0.001uM	-0.0625548	0.13448	-0.466296	0.137138	0.135815	0.315901	0.358827
GSE51068_OCI-LY3_Geldanamycin.24h.0.032uM	-0.579826	-0.285812	-0.720551	-0.00832313	-0.558512	-0.259895	0.436256
GSE51068_OCI-LY3_Geldanamycin.6h.0.001uM	-0.115444	0.0494162	-0.252222	0.195597	-0.0409574	-0.790257	-0.295755
GSE51068_OCI-LY3_Geldanamycin.6h.0.032uM	0.09091	0.083298	-0.0954748	0.225391	-0.915182	-0.42208	0.392585
GSE51068_OCI-LY3_H-7 Dihydrochloride.12h.12.4uM	-0.5561	0.0424866	-0.62181	0.0794564	0.158833	0.333149	0.234658
GSE51068_OCI-LY3_H-7 Dihydrochloride.12h.20.2uM	-0.0527513	0.0705623	-0.473731	0.0711571	-0.0469699	0.792807	0.0945342
GSE51068_OCI-LY3_H-7 Dihydrochloride.24h.12.4uM	-0.249737	0.0585501	0.217759	0.179032	-0.406195	0.0223258	0.414743
GSE51068_OCI-LY3_H-7 Dihydrochloride.24h.20.2uM	-0.499863	-0.244203	-0.0581058	0.195173	-0.47169	-0.0636527	0.451246
GSE51068_OCI-LY3_H-7 Dihydrochloride.6h.12.4uM	0.0869948	0.0730516	0.150719	0.278828	-0.0526976	0.509516	0.223312
GSE51068_OCI-LY3_H-7 Dihydrochloride.6h.20.2uM	0.210126	0.0782884	0.233639	0.122438	-0.00641028	0.157266	0.337732
GSE51068_OCI-LY3_Methotrexate.12h.100uM	-0.0124561	0.155701	-0.145884	0.0074082	0.00786747	0.0647307	0.021717
GSE51068_OCI-LY3_Methotrexate.24h.100uM	0.0685752	0.180154	-0.263683	0.191449	0.488932	0.508231	0.308228
GSE51068_OCI-LY3_Methotrexate.6h.100uM	0.0685503	0.137485	-0.439659	0.124821	0.0401635	-0.546276	0.152563
GSE51068_OCI-LY3_Mitomycin C.12h.0.553uM	-0.266599	0.186208	-0.487642	-0.153127	0.137273	0.361237	0.161054
GSE51068_OCI-LY3_Mitomycin C.12h.2.56uM	-0.0966601	0.155115	0.171706	-0.0565999	0.0945538	1.48936	0.530891
GSE51068_OCI-LY3_Mitomycin C.24h.0.553uM	0.101013	0.251594	-0.064088	0.0895859	0.338344	0.0549054	0.0760203
GSE51068_OCI-LY3_Mitomycin C.24h.2.56uM	0.138909	0.0700596	-0.0140694	0.172897	0.176727	-0.0731574	0.133479
GSE51068_OCI-LY3_Mitomycin C.6h.0.553uM	-0.0393536	0.0786158	-0.235301	-0.112087	0.0395127	-0.76967	0.471549
GSE51068_OCI-LY3_Mitomycin C.6h.2.56uM	-0.0147156	0.0912675	-0.293953	-0.0539061	0.193591	-0.542392	0.407322
GSE51068_OCI-LY3_Monastrol.12h.100uM	-0.119642	0.182928	-0.482206	-0.0435942	-0.00195386	0.607471	-0.0115839
GSE51068_OCI-LY3_Monastrol.12h.50uM	0.26379	0.152533	-0.0807055	0.0987854	-0.00207777	0.258271	0.0101611
GSE51068_OCI-LY3_Monastrol.24h.100uM	0.46222	-0.0182374	0.489195	0.305377	-0.0654744	-0.0715192	0.0969798
GSE51068_OCI-LY3_Monastrol.24h.50uM	0.281831	0.0679027	0.0839049	0.162722	0.131554	-0.417649	0.171467
GSE51068_OCI-LY3_Monastrol.6h.100uM	0.233143	0.0617834	-0.221105	0.162098	0.153786	-0.113426	0.322816
GSE51068_OCI-LY3_Monastrol.6h.50uM	0.250973	0.0927583	-0.70863	0.0746939	0.191414	-0.11531	-0.252222
GSE51068_OCI-LY3_Rapamycin.12h.13.8uM	-0.139333	0.0969088	0.0191348	-0.0536952	0.344738	0.542181	0.061037
GSE51068_OCI-LY3_Rapamycin.12h.22uM	0.279504	0.0180197	0.071308	0.0897113	0.262714	-0.210972	0.20672
GSE51068_OCI-LY3_Rapamycin.24h.13.8uM	-0.159868	0.0189897	0.217922	0.14412	0.0787003	0.226602	0.0365545
GSE51068_OCI-LY3_Rapamycin.24h.22uM	0.240151	-0.125569	0.4392	0.153487	0.196857	-0.227442	0.47406
GSE51068_OCI-LY3_Rapamycin.6h.13.8uM	0.0299638	-0.00778061	-0.0118475	0.180331	0.515489	0.0225413	0.0938436
GSE51068_OCI-LY3_Rapamycin.6h.22uM	0.0813201	0.0669745	0.163994	0.146493	0.144214	0.0618137	-0.145884
GSE51068_OCI-LY3_Trichostatin A.12h.0.114uM	-0.0903854	-0.14992	-0.282178	0.0816411	-0.482057	0.534413	0.358365
GSE51068_OCI-LY3_Trichostatin A.12h.0.143uM	-0.358546	-0.127854	-0.435515	-0.0210417	-0.389537	0.625145	0.0511624
GSE51068_OCI-LY3_Trichostatin A.24h.0.114uM	0.294874	0.0937512	-0.263219	0.263	0.528209	0.242555	0.485265
GSE51068_OCI-LY3_Trichostatin A.24h.0.143uM	0.266938	0.0286447	0.389948	0.273202	0.307021	0.782897	0.156878
GSE51068_OCI-LY3_Trichostatin A.6h.0.114uM	-0.152967	-0.0321825	-0.205728	0.0225055	-0.387698	0.523142	0.146336
GSE51068_OCI-LY3_Trichostatin A.6h.0.143uM	-0.098664	-0.038751	-0.252766	0.0158143	-0.360695	0.513107	0.16222
GSE51068_OCI-LY3_Vincristine.12h.0.005uM	-0.111755	0.189311	-0.126847	0.0226446	0.0577986	0.136771	-0.0745212
GSE51068_OCI-LY3_Vincristine.12h.0.01uM	0.137757	0.212246	-0.11951	0.0527429	0.0958213	-0.0821	-0.137971
GSE51068_OCI-LY3_Vincristine.24h.0.005uM	-0.167019	0.134162	0.0663833	0.194676	-0.162586	-0.098848	-0.0640351
GSE51068_OCI-LY3_Vincristine.24h.0.01uM	0.0964098	0.140582	0.152643	0.0919611	0.379938	0.135422	0.0880487
GSE51068_OCI-LY3_Vincristine.6h.0.005uM	-0.00117742	0.0630528	-0.0178868	0.194989	0.0623761	-0.543941	-0.455652
GSE51068_OCI-LY3_Vincristine.6h.0.01uM	0.273151	0.0315004	0.1748	0.165329	-0.254064	-1.22923	-0.0443643
GSE51212_HCC827_AZD6244.6h	0.337732	0.315234	0.307687	0.10029	0.574744	-0.837953	0.243889
GSE51212_HCC827_BEZ235.6h	0.436256	0.461654	0.352441	0.205625	-0.106543	0.15322	0.185262
GSE51212_HCC827_Erlotinib.6h	-0.260014	-0.289425	-0.274364	-0.0147156	0.327557	-0.547049	0.00219054
GSE52434_MCL_AFN700	0.223861	-0.0454678	0.148278	0.0791375	0.171036	0.328124	0.524496
GSE53309_MCL_mTOR	0.182706	0.131489	0.0929374	0.000917192	0.326363	-0.365968	0.178383
GSE53309_MCL_panPI3K	0.513413	0.139024	0.206885	0.247904	0.222527	-0.280561	0.132372
GSE53309_MCL_PI3K+mTOR	0.00626123	-0.372025	-0.152213	0.0814761	-0.0516255	-0.27475	0.275359
GSE54979_OCCC_ARID1A	-0.413416	-0.0825637	0.24403	-0.0148823	-0.549368	-0.103033	0.108033
GSE54979_OCCC_GSK126	-1.00088	0.270871	0.633725	1.41999e-05	0.0808169	0.262179	0.163807
GSE55830_SCLC_ABT888.5	-0.277288	0.0643504	0.255794	0.475909	0.185371	0.154648	0.379692
GSE55830_SCLC_ABT888.50	0.505038	0.351657	0.0756168	0.124469	0.0732273	-0.0119758	0.179343
GSE55830_SCLC_Cisplatin	0.560922	0.235326	0.172214	0.194339	0.421268	-0.0412552	0.325974
GSE55830_SCLC_Cisplatin+ABT888.5	0.670311	0.214961	0.00118964	0.0771978	0.47824	0.119924	0.358827
GSE55830_SCLC_Cisplatin+ABT888.50	0.461422	0.234478	0.0375465	0.123263	-0.0646186	0.00103451	0.15357
GSE55830_SCLC_Radiation	-0.581194	0.110339	0.084527	0.0706703	-0.121997	0.0876309	0.0882126
GSE57130_Het_Azacitidine	-0.125354	-0.198595	0.173768	0.097721	0.129214	0.102594	0.157124
GSE57130_Het_Azacitidine+MS275	0.240568	0.599081	0.24582	0.21812	0.345799	0.401808	-0.00731387
GSE57130_Het_MS275	0.62911	0.649884	0.36646	0.412222	0.159427	0.344395	0.082935
GSE57130_OE21_Azacitidine	-0.0582673	0.0748277	0.127643	0.179787	0.122368	0.0152086	0.262953
GSE57130_OE21_Azacitidine+MS275	0.107591	0.205772	-0.0134747	0.283477	-0.564804	0.135621	0.0898767
GSE57130_OE21_MS275	0.12341	0.089321	0.0891419	0.244218	-0.946766	-0.00328288	0.131296
GSE57130_OE33_Azacitidine	1.16371	1.05452	0.871239	0.853064	0.564154	-0.203884	0.142424
GSE57130_OE33_Azacitidine+MS275	0.595314	0.800267	0.414917	0.620326	0.442594	-0.205641	0.0460167
GSE57130_OE33_MS275	0.672735	0.834058	0.356136	0.560373	-0.453772	-0.196489	0.0244026
GSE57422_A549_Erlotinib.1Î¼M+Quinacrine.5Î¼M	0.299081	0.187357	0.814828	0.44722	0.733443	-0.627049	-0.808276
GSE57422_A549_Erlotinib	-0.06478	0.353244	0.471084	0.393541	0.0820746	-0.891906	-0.65326
GSE57422_A549_Quinacrine	0.366014	0.521431	0.78883	0.404462	0.677282	-0.795755	-0.38287
GSE57422_H1975_Erlotinib.1Î¼M+Quinacrine.3Î¼M	0.668649	0.655237	0.568877	0.498155	0.984746	0.143293	0.00103451
GSE57422_H1975_Erlotinib	0.448995	0.413935	0.0657882	0.266938	0.135146	-0.470175	-0.661248
GSE57422_H1975_Quinacrine	0.636908	0.54037	0.348932	0.235818	0.769506	0.178001	-0.0133075
GSE58721_WM9_PLX4720	1.06631	0.817724	0.452339	0.825999	0.76677	0.0892849	0.12203
GSE59183_A375_Lactimidomycin.24h	0.290915	0.901486	0.0646539	0.100637	0.472888	0.539898	0.533955
GSE59183_A375_Lactimidomycin.8h	-0.259895	0.496381	0.101311	-0.171123	0.00545039	1.30185	1.03572
GSE59183_A375_Trifluridine.24h	0.131788	0.431135	-0.150666	0.0952649	0.778029	0.394182	0.511812
GSE59183_A375_Trifluridine.8h	0.227447	0.633725	-0.0540656	-0.14992	0.317901	0.241568	0.572791
GSE59340_A375_Ciclopirox.24h	1.00135	0.330068	0.191777	0.845641	0.589268	-0.011933	0.200079
GSE59340_A375_Ciclopirox.8h	0.147046	0.0974672	0.219222	0.323331	-0.121235	0.0295813	-0.114014
GSE59340_A375_Crizotinib.24h	0.78632	0.582648	0.748995	0.566921	0.815976	0.00308785	0.0296149
GSE59340_A375_Crizotinib.8h	0.254609	0.323514	0.0797683	1.07859	-0.091458	-0.165374	0.134687
GSE59341_WM35_Lactimidomycin.24h	-0.00101382	0.866892	0.255316	0.181192	0.342209	0.406095	0.390955
GSE59341_WM35_Lactimidomycin.8h	-0.232613	0.579445	0.17208	0.335432	0.155847	0.810757	0.832126
GSE59341_WM35_Trifluridine.24h	0.0904439	0.333543	0.219665	0.430149	0.647983	0.25925	0.144808
GSE59341_WM35_Trifluridine.8h	0.0108955	0.529432	0.535385	0.442379	0.20888	0.666161	0.608948
GSE59342_WM35_Ciclopirox.24h	0.534567	0.82362	0.14101	0.0959846	0.548095	-0.127208	0.0890664
GSE59342_WM35_Ciclopirox.8h	0.359864	0.666449	0.395183	0.0298591	0.288007	0.26281	0.132284
GSE59342_WM35_Crizotinib.24h	0.363464	0.733853	0.321038	0.582648	0.826613	0.126691	0.266938
GSE59342_WM35_Crizotinib.8h	0.0775847	0.522045	0.0978377	-0.00786467	0.137028	0.1039	0.0907275
GSE59368_HT1080_Etoposide.0.003	0.172738	0.0915086	0.161649	0.285584	0.249733	-0.740545	-0.818511
GSE59368_HT1080_Etoposide.0.01	0.197582	-0.00866782	0.141378	0.202902	0.369038	-0.0696111	-0.397272
GSE59368_HT1080_Etoposide.0.03	0.343149	0.368744	0.401636	0.19882	0.953994	-0.274097	-0.464313
GSE59368_HT1080_Etoposide.0.1	0.557504	0.658889	0.703881	0.276648	1.21149	0.173598	-0.396259
GSE59368_HT1080_Etoposide.0.3	0.544357	0.681692	0.7848	0.262179	1.28932	0.238688	-0.407485
GSE59368_HT1080_Etoposide.1	0.577653	0.745637	0.819514	0.281831	1.27714	0.318159	-0.381952
GSE59368_HT1080_Etoposide.3	0.493677	0.755796	0.750663	0.280478	1.34019	0.495416	-0.228752
GSE59368_HT1080_MMS.1	-0.207825	-0.195973	-0.160211	-0.0334326	-0.0373076	0.532848	0.308171
GSE59368_HT1080_MMS.10	-0.16937	-0.406371	-0.0917644	-0.0357465	-0.0639816	0.387772	0.555914
GSE59368_HT1080_MMS.100	-0.442864	-0.394212	-0.375814	-0.0741472	0.193666	0.257985	0.0926064
GSE59368_HT1080_MMS.3	-0.27475	-0.378042	-0.245932	-0.0547173	-0.247607	0.237042	0.445481
GSE59368_HT1080_MMS.30	-0.158529	-0.263683	-0.0981106	-0.0688402	0.105443	0.513261	0.346297
GSE59368_HT1080_MMS.300	-0.371709	-0.295575	-0.239817	-0.0811142	0.498017	0.394858	0.348932
GSE59368_HT1080_MMS.500	-0.0468137	0.11616	0.16406	-0.00320057	0.518266	0.373936	0.298528
GSE59368_HT1080_Quercetin.1	0.0256585	0.175723	0.106584	0.105402	0.360882	0.650763	0.278103
GSE59368_HT1080_Quercetin.10	0.335365	0.584625	0.629343	0.184715	0.912045	0.778996	0.431872
GSE59368_HT1080_Quercetin.100	0.386103	0.622899	0.686643	0.207775	1.36082	1.37202	0.425802
GSE59368_HT1080_Quercetin.3	0.128354	0.249453	0.131195	0.136308	0.343017	0.201119	0.107551
GSE59368_HT1080_Quercetin.30	0.452454	0.622472	0.645622	0.228894	1.27342	1.32063	0.479239
GSE59368_HT1080_Quercetin.60	0.41722	0.63755	0.712054	0.227709	1.42179	1.31075	0.358827
GSE59368_HT1080_Quercetin.80	0.365257	0.664679	0.734623	0.201862	1.40139	1.449	0.334193
GSE62477_MCF7_MELK-T1.48h	0.299034	0.62078	0.795828	0.337011	1.24397	0.161349	0.0285725
GSE62477_MCF7_MELK-T1.72h	0.392924	0.827181	0.673038	0.449838	1.20263	0.0725174	0.155031
GSE62533_CLL_BV6.20h	1.42179	1.28114	1.30185	1.94343	0.574957	0.113815	0.0436797
GSE62533_CLL_BV6.4h	1.40139	1.29765	1.26949	1.86598	0.661084	0.116735	0.0450393
GSE63593_A549_PS432	0.20225	0.466382	0.351582	0.180044	0.287312	1.01879	-0.251419
GSE63593_A549_PSX146	0.340067	0.433615	0.416553	0.102539	0.291971	0.801367	-0.236632
GSE63593_A549_PSX626	-0.0440517	-0.0437994	0.100876	0.135397	0.101765	0.11128	-0.580728
GSE63593_A549_PSX706	0.152838	0.365938	0.251406	0.323966	0.354689	0.464074	-0.134826
GSE66660_U937.EVI1_Etoposide	0.552746	0.54567	0.508514	0.504492	0.473702	0.289826	0.11157
GSE66660_U937.vec_Etoposide	0.600942	0.644817	0.614269	0.444517	0.488932	0.204764	0.2593
GSE67529_EW5.PDX_IGF-1Ri	0.733443	0.32642	0.519608	0.290313	0.770423	0.110654	-0.0328579
GSE67529_EW5.PDX_mTORi	-0.106805	-0.392366	-0.578469	-0.451472	0.307932	0.112721	0.199343
GSE68453_A375_Lapatinib	0.375259	0.871239	0.39869	0.243323	0.31444	0.0933675	0.10162
GSE68453_A375_Mastinib	0.626406	0.79752	0.676961	-0.0665451	0.437901	0.029823	0.124193
GSE68453_A375_PLX4720	0.121491	0.326942	0.772342	0.0558049	0.609843	0.0902778	0.483271
GSE68453_A375_PLX4720+Lapatinib	-0.151147	0.861357	0.631761	0.166953	0.551207	0.0664074	0.148898
GSE68453_A375_PLX4720+Mastinib	0.26418	0.97184	0.137802	0.530389	0.356281	-0.240239	0.239469
GSE68453_DM122_PLX4720	0.202362	0.338996	0.440591	0.204029	0.101648	-0.0223546	0.132512
GSE68453_DM13_PLX4720	-0.00966	0.524807	0.311879	0.107004	0.219504	0.061432	0.093824
GSE68453_DM331_Lapatinib	0.0971384	0.137323	0.407322	0.334516	0.06957	0.198554	0.108487
GSE68453_DM331_Mastinib	0.592568	-0.385779	0.290646	0.477015	-0.462601	0.013807	0.00954854
GSE68453_DM331_PLX4720	0.833398	0.119052	0.260207	0.0630804	0.151759	0.0855369	0.0502177
GSE68453_DM331_PLX4720+Lapatinib	-0.542788	0.0330807	0.229961	0.407152	0.0951862	0.0982022	0.0436161
GSE68453_DM331_PLX4720+Mastinib	0.451137	-0.0429416	0.136567	-0.211627	0.155729	-0.0443117	0.0898587
GSE68453_DM6_PLX4720	0.0238286	0.0967524	0.0673149	1.11679	0.0207792	0.100041	0.384515
GSE68453_HT144_Lapatinib	-0.427327	-0.142051	-0.00845633	-0.384969	0.927744	0.341795	0.0492494
GSE68453_HT144_Mastinib	-0.126996	0.123014	-0.0120653	0.0695419	0.155649	0.135032	0.0226812
GSE68453_HT144_PLX4720	-0.438772	0.0670027	0.193517	-0.00450129	0.301328	0.119682	-0.0601792
GSE68453_HT144_PLX4720+Lapatinib	0.117027	0.218449	0.279866	-0.0222101	0.706723	0.116341	-0.155236
GSE68453_HT144_PLX4720+Mastinib	-0.0760774	0.105107	0.321826	0.0410187	0.319385	0.13923	-0.0217209
GSE68453_SKMEL2_PLX4720	0.0710465	-0.0923662	-0.0174527	-0.000538977	0.0528332	0.499403	0.108789
GSE68453_SKMEL24_Lapatinib	0.543166	0.691245	0.151653	0.375026	0.0587588	0.0292573	0.232473
GSE68453_SKMEL24_Mastinib	0.672735	0.124181	0.0863066	0.233324	0.29981	-0.0135615	0.0921189
GSE68453_SKMEL24_PLX4720	0.945518	0.394611	0.0900076	-0.0257897	0.128299	0.0569323	0.0273464
GSE68453_SKMEL24_PLX4720+Lapatinib	0.830284	0.578261	0.124012	0.202055	0.266987	0.0396157	0.0147636
GSE68453_SKMEL24_PLX4720+Mastinib	0.927744	0.512657	0.0977699	0.142424	0.806211	0.107576	0.106555
GSE68453_SKMEL28_Lapatinib	-0.793029	0.1571	0.197426	0.270719	0.169396	0.0988534	0.463398
GSE68453_SKMEL28_Mastinib	0.242128	-0.105262	0.706018	-0.516579	0.455586	0.0133614	0.178036
GSE68453_SKMEL28_PLX4720	-0.134384	0.121341	0.277443	0.876505	0.0174671	0.0340136	-0.0121103
GSE68453_SKMEL28_PLX4720+Lapatinib	0.142867	0.442594	1.05948	0.502356	-0.063134	0.244981	0.199228
GSE68453_SKMEL28_PLX4720+Mastinib	-0.0912736	0.0644638	0.547021	0.944498	0.43229	0.137757	0.0627737
GSE68453_SLM2_PLX4720	-0.0798297	0.305495	0.097429	0.264377	-0.0146248	0.121353	0.296811
GSE68453_VMM12_PLX4720	-0.245285	0.232515	0.10642	-0.0957165	0.181975	-0.152049	0.246946
GSE68453_VMM15_PLX4720	0.336879	0.40937	0.183713	1.11679	0.0729452	0.294084	-0.292151
GSE68453_VMM17_PLX4720	0.302606	0.366762	0.181943	0.260308	0.616147	0.0241529	0.13235
GSE68453_VMM18_PLX4720	0.0569323	-0.514319	0.119673	0.121143	0.152591	0.123014	0.0197696
GSE68453_VMM39_PLX4720	-0.48621	-0.15898	-0.0785121	-0.165659	0.110701	0.0738076	0.422144
GSE68453_VMM5A_PLX4720	-0.0981721	-0.241726	-0.0987848	0.168088	-0.200933	0.0957279	0.238554
GSE69742_A375 xenograft_Bevacizumab	0.312297	0.396332	0.266049	0.0845077	0.262332	0.124346	-0.123051
GSE69742_A375 xenograft_PLX4720	0.82785	1.194	0.406981	0.735404	0.840479	-0.241188	0.117034
GSE69742_A375 xenograft_PLX4720+Bevacizumab	0.644567	1.01199	0.740604	0.869732	0.856416	0.452017	0.233459
GSE73024_AN3CA_CH5183284	0.718361	0.609611	0.729145	0.466739	-0.0257897	0.115065	0.115065
GSE73024_DMS-114_CH5183284	0.349337	-0.24097	0.464414	0.480506	-0.0834874	0.113911	0.113911
GSE73024_HSC-39_CH5183284	0.441741	0.515631	0.634498	0.403311	0.635787	0.280454	0.114625
GSE73024_KATO-III_CH5183284	0.558011	0.775121	0.716962	0.329481	0.345282	0.115414	0.215386
GSE73024_KMS-11_CH5183284	0.338344	0.267329	-0.0676805	0.220705	-0.0299442	0.465109	0.113549
GSE73024_MFE-280_CH5183284	0.473456	0.432077	0.348169	0.488932	-0.0859541	0.115357	0.115357
GSE73024_MFE-296_CH5183284	0.626178	0.551207	0.688641	0.457431	0.488673	-0.0360056	0.114811
GSE73024_NCI-716_CH5183284	0.509237	0.540531	0.577856	0.335365	0.640626	0.0304675	0.113821
GSE73024_NCI-H1581_AZD4547	0.431772	-0.363015	0.632704	0.658889	-0.375224	0.108576	0.108576
GSE73024_NCI-H1581_CH4987655	0.379441	-0.411538	0.748149	0.605341	-0.156193	0.108912	0.108912
GSE73024_NCI-H1581_CH5132799	0.294823	-0.829917	0.392585	0.497612	-0.605401	0.108216	0.108216
GSE73024_NCI-H1581_CH5183284	0.625389	0.420608	0.748149	0.588021	0.479122	0.114499	0.114499
GSE73024_NCI-H520_CH5183284	-0.215584	0.518266	0.355196	0.301328	0.560739	0.115034	0.115034
GSE73024_NCI-N87_CH5183284	0.394611	-0.0371075	-0.0228569	-0.0124561	-0.238078	0.302054	0.113387
GSE73024_RT-4_CH5183284	0.581652	0.779462	0.55417	0.237001	0.670606	0.0237783	0.249225
GSE73024_SNU-16_CH5183284	0.464074	0.519001	0.488016	0.439404	0.30595	0.11534	0.11534
GSE73024_UM-UC-14_CH5183284	0.499833	0.70001	0.593421	0.298425	0.484021	0.115698	0.115698
GSE74514_B-CLL_2cPE	-0.0876553	-0.151803	-0.0696111	-0.080877	-0.505581	0.101182	0.135281
GSE74514_B-CLL_Bortezomib	-0.137515	-0.0309229	0.101	-0.0391525	0.257654	0.273251	0.0192124
GSE74842_HSC57_PD0325901	0.04232	0.121217	0.117632	0.105353	0.0718628	-0.369116	0.308869
GSE74842_SH10TC_PD0325901	0.205352	0.0349039	0.0716697	0.201749	0.211407	-0.883351	-0.228548
GSE74842_SNU719_PD0325901	0.0934049	0.146058	0.0825338	0.301966	0.036902	-0.0193101	-0.162304
GSE74842_TMK1_PD0325901	0.135644	0.116993	0.0539583	0.0702225	0.218808	0.384752	0.504327
GSE75620_Huh7_Sorafenib	0.190261	0.128437	0.146966	0.596986	0.0932499	-0.0716855	0.0340136
GSE75620_shRb_Sorafenib	0.144261	0.468641	0.204069	0.542341	0.107955	0.109021	0.128683
GSE78234_Jurkat_Panobinostat	0.530891	0.804011	0.816549	0.309394	0.0825605	0.405748	0.104125
GSE78234_KOPN8_Panobinostat	0.441843	0.389032	0.307021	0.371101	0.307078	0.35267	0.212576
GSE78234_REH_Panobinostat	0.468771	0.675423	0.621025	0.230397	-0.007606	0.136455	0.244173
GSE78234_SEM_Panobinostat	0.550027	0.535058	0.498566	0.303507	0.627634	0.365475	-0.11051
GSE79316_Glioma_BEZ235	0.112588	0.360161	0.112588	0.262903	0.112588	0.112588	-0.0422871
GSE79316_Glioma_DS7423	0.113583	0.720168	0.113583	0.303616	0.113583	0.113583	-0.111117
GSE79688_HCC4006.R_Gefitinib	0.752803	0.688971	0.147845	0.28043	0.708793	-0.682647	0.64249
GSE79688_HCC827.R_Gefitinib	0.614739	0.426504	0.302546	0.380016	0.143327	-0.12735	0.805146
GSE81363_BxPC3_Deferasirox	0.177253	0.382065	0.253977	-0.0512543	0.166103	-0.74276	0.415974
GSE84205_MPNST_INK128	0.115393	0.115393	0.0897926	0.300034	-0.161272	0.337274	0.673939
GSE84205_MPNST_INK128+Vorinostat	0.118162	0.118162	0.319139	0.252408	0.420989	1.07682	-0.140958
GSE84205_MPNST_Vorinostat	0.118331	0.118331	0.110437	0.282088	0.225566	1.25476	-0.108242
GSE84862_OPM2_VS5584	0.112969	0.112969	0.876505	0.826613	0.522696	0.240018	0.102392
GSE84863_MDA-MB231_Doxorubicin	0.602944	0.642209	0.521886	0.533176	0.616374	-0.151479	-0.157222
GSE84863_MDA-MB231_Etoposide	0.355196	0.364882	0.334699	0.387001	0.476273	-0.188915	-0.53436
GSE84863_MDA-MB231_MMS	-0.0197604	-0.0394519	0.0077531	0.182744	-0.118156	0.260261	-0.1543
GSE84863_MDA-MB231_Paclitaxel	0.443557	0.62078	0.46686	0.405106	0.421938	-0.200933	-0.390374
GSE84863_U2OS_Doxorubicin	0.602448	0.58225	0.55364	0.548976	0.686643	-0.292904	-0.468333
GSE84863_U2OS_Etoposide	0.362436	0.209532	0.226949	0.310933	0.820075	-0.0461411	-0.170351
GSE84863_U2OS_MMS	0.17797	0.035544	0.0286063	0.0607011	0.204216	0.405491	-0.488592
GSE84863_U2OS_Paclitaxel	0.273576	0.00151145	0.187154	0.063228	0.28967	0.713419	0.235241
GSE86597_LS180_KR12	0.302309	0.231832	0.255746	0.241846	0.323267	0.111539	-0.073592
GSE86598_SW480_KR12	0.210593	0.175182	0.161434	0.235326	0.177733	0.0893039	0.0621002
GSE87879_H1299_Palbociclib	0.858493	1.00135	0.869732	0.877272	0.0527133	-0.158339	0.0636702
GSE87886_PC3-ML_Palbociclib	0.393332	0.535058	0.384515	0.308228	0.690927	-0.170539	0.0406472
GSE89127_A375_THZ1	0.0178391	-0.228337	-0.227636	0.220496	0.596986	0.706723	0.313647
GSE89127_A375_Vemurafenib	0.540857	0.536197	0.427311	0.525565	0.2088	-0.510302	0.519925
GSE89127_A375_Vemurafenib+THZ1	0.150663	-0.0618175	-0.0333343	0.299473	0.723833	0.323331	0.211695
GSE89127_A549_GSK1120212	0.496641	0.683483	0.521431	0.654962	0.677582	0.391559	0.11121
GSE89127_A549_GSK1120212+THZ1	0.415307	0.365182	0.408441	0.683483	1.07682	0.299588	0.112206
GSE89127_A549_THZ1	-0.135269	-0.129296	-0.360124	0.517811	1.47254	0.204029	0.113525
GSE89127_H3122_Crizotinib	0.656899	0.512657	0.314919	-0.271122	-0.0338914	-0.990698	0.244655
GSE89127_H3122_Crizotinib+THZ1	0.490134	0.408619	0.380887	0.183641	0.32806	-0.949513	0.11265
GSE89127_H3122_THZ1	1.12345	0.419734	0.29619	0.598028	0.970668	-0.000223649	0.269606
GSE89127_N87_Lapatinib	0.264279	0.328558	0.393249	0.374013	0.188646	-0.241405	0.111079
GSE89127_N87_Lapatinib+THZ1	-0.0127523	-0.132026	-0.0314158	0.0658281	-0.0486227	-0.120459	0.112182
GSE89127_N87_THZ1	-0.147913	-0.647343	-0.519938	-0.270609	0.173424	0.702473	0.112664
GSE89127_PC9_Erlotinib	0.632468	0.859907	0.437901	0.449838	0.365704	-0.474822	-0.0931366
GSE89127_PC9_Erlotinib+THZ1	0.332713	0.591105	0.411045	0.603839	0.958462	0.283418	0.715919
GSE89127_PC9_THZ1	-0.151147	0.0351007	0.00633969	0.0617583	0.492731	1.33511	1.15612
GSE89127_RT112_BGJ398	0.614514	0.68532	0.588842	0.643003	0.2692	0.634769	0.438003
GSE89127_RT112_BGJ398+THZ1	0.370187	0.403749	0.492473	0.76257	0.693514	1.13721	0.388024
GSE89127_RT112_THZ1	0.308171	0.374868	0.415017	0.760276	0.749404	1.40755	0.174181
GSE95513_HCT116_Bortezomib	-0.0360816	-0.135722	0.166292	-0.113219	0.190672	1.09777	0.114261
GSE95513_HCT116_JQ1	0.0275298	-0.213853	0.238647	0.208673	0.0736644	0.187595	0.114116
GSE95513_HCT116_JQ1+Bortezomib	0.0524844	-0.077952	0.223021	0.164428	0.0448782	0.966103	0.114132
GSE95513_RKO_JQ1	0.397907	0.183189	0.405491	0.462114	0.177044	-0.577557	0.113361
GSE96035_HCT116_Entinostat	0.471663	0.574536	0.345076	-0.0510515	-0.122205	0.112908	0.112908
GSE96760_H-STS_(5Z)-7-Oxozeanol.0.22.24	0.115844	0.115844	0.115844	0.613555	0.115844	0.419247	0.406453
GSE96760_H-STS_(5Z)-7-Oxozeanol.0.22.6	0.11315	0.11315	0.11315	0.130279	0.11315	-0.36316	0.0764375
GSE96760_H-STS_Afatinib.1.24	0.116268	0.116268	0.116268	-2.46473e-05	0.116268	0.2879	0.0475247
GSE96760_H-STS_Afatinib.1.6	0.114055	0.114055	0.114055	0.48064	0.114055	0.0142066	0.160867
GSE96760_H-STS_Alisertib.0.004.24	0.113662	0.113662	0.113662	-0.0993576	0.113662	0.535719	-0.0479035
GSE96760_H-STS_Alisertib.0.004.6	0.113868	0.113868	0.113868	0.36609	0.113868	-0.0998136	0.123707
GSE96760_H-STS_Alisertib.0.044.24	0.113262	0.113262	0.113262	0.0257368	0.113262	0.291346	0.189162
GSE96760_H-STS_Alisertib.0.044.6	0.113927	0.113927	0.113927	0.697589	0.113927	-0.254318	0.226222
GSE96760_H-STS_Arachidonyl.7.44.24	0.114489	0.114489	0.114489	0.455698	0.114489	1.69843	0.912045
GSE96760_H-STS_Arachidonyl.7.44.6	0.114158	0.114158	0.114158	0.675127	0.114158	1.57935	1.10826
GSE96760_H-STS_At13387.0.07.24	0.114253	0.114253	0.114253	-1.73954	0.114253	0.0109714	0.438972
GSE96760_H-STS_At13387.0.07.6	0.113	0.113	0.113	0.473577	0.113	0.663602	0.174696
GSE96760_H-STS_AUY922.0.02.24	0.112758	0.112758	0.112758	-0.763757	0.112758	0.112758	0.112758
GSE96760_H-STS_AUY922.0.02.6	0.113978	0.113978	0.113978	0.0169925	0.113978	0.113978	0.113978
GSE96760_H-STS_AZD6482.0.322.24	0.116156	0.116156	0.116156	0.89729	0.116156	0.921194	0.28285
GSE96760_H-STS_AZD6482.0.322.6	0.112969	0.112969	0.112969	-0.00595152	0.112969	-0.107976	0.042119
GSE96760_H-STS_AZD7762.0.03.24	0.11581	0.11581	0.11581	0.934481	0.11581	-0.276141	-0.196914
GSE96760_H-STS_AZD7762.0.03.6	0.113546	0.113546	0.113546	0.708442	0.113546	-0.0161378	-0.0362167
GSE96760_H-STS_AZD8055.2.24	0.114772	0.114772	0.114772	0.386418	0.114772	0.285049	0.360532
GSE96760_H-STS_AZD8055.2.6	0.11229	0.11229	0.11229	0.228092	0.11229	-0.065629	0.295136
GSE96760_H-STS_AZD8055.20.24	0.115056	0.115056	0.115056	0.531215	0.115056	-0.0656791	-0.0498913
GSE96760_H-STS_AZD8055.20.6	0.11363	0.11363	0.11363	0.277945	0.11363	-0.064193	0.0427184
GSE96760_H-STS_Bafetinib.3.24.24	0.116445	0.116445	0.116445	0.303113	0.116445	0.248567	0.403311
GSE96760_H-STS_Bafetinib.3.24.6	0.112847	0.112847	0.112847	-0.0563374	0.112847	-0.0856579	0.00935537
GSE96760_H-STS_Bardoxolone methyl.0.15.24	0.116176	0.116176	0.116176	0.427499	0.116176	0.801904	0.983555
GSE96760_H-STS_Bardoxolone methyl.0.15.6	0.113526	0.113526	0.113526	0.0977699	0.113526	0.904852	0.598229
GSE96760_H-STS_Belinostat.0.00325.24	0.114843	0.114843	0.114843	0.678832	0.114843	2.18278	0.545831
GSE96760_H-STS_Belinostat.0.00325.6	0.114314	0.114314	0.114314	0.40493	0.114314	-0.111493	-0.0982971
GSE96760_H-STS_Belinostat.0.0325.24	0.114672	0.114672	0.114672	0.495811	0.114672	1.55676	0.763963
GSE96760_H-STS_Belinostat.0.0325.6	0.115056	0.115056	0.115056	0.23696	0.115056	0.273304	0.32929
GSE96760_H-STS_Bexarotene.20.24	0.116384	0.116384	0.116384	-0.0512543	0.116384	-0.434696	-0.123677
GSE96760_H-STS_Bexarotene.20.6	0.115289	0.115289	0.115289	0.497327	0.115289	0.488408	-0.111956
GSE96760_H-STS_BGJ398.4.56.24	0.112671	0.112671	0.112671	0.053771	0.112671	0.112671	0.112671
GSE96760_H-STS_BGJ398.4.56.6	0.11187	0.11187	0.11187	-0.0358864	0.11187	0.11187	0.11187
GSE96760_H-STS_BI-2536.0.009.24	0.114444	0.114444	0.114444	1.29333	0.114444	-0.396425	0.296469
GSE96760_H-STS_BI-2536.0.009.6	0.113383	0.113383	0.113383	0.72269	0.113383	0.279557	-0.0725672
GSE96760_H-STS_BIO.3.24	0.11187	0.11187	0.11187	-0.0404059	0.11187	0.11187	0.11187
GSE96760_H-STS_BIO.3.6	0.113865	0.113865	0.113865	0.493677	0.113865	0.113865	0.113865
GSE96760_H-STS_BKM120.1.2.24	0.11299	0.11299	0.11299	0.3973	0.11299	0.11299	0.11299
GSE96760_H-STS_BKM120.1.2.6	0.111559	0.111559	0.111559	0.655515	0.111559	0.111559	0.111559
GSE96760_H-STS_BMS-754807.0.72.24	0.113081	0.113081	0.113081	0.385434	0.113081	0.219665	0.434228
GSE96760_H-STS_BMS-754807.0.72.6	0.112859	0.112859	0.112859	0.0424203	0.112859	0.420403	-0.0502101
GSE96760_H-STS_Bortezomib.0.0088.24	0.363997	0.363997	0.363997	0.174526	0.363997	-0.264044	-0.634127
GSE96760_H-STS_Bortezomib.0.0088.6	0.114543	0.114543	0.114543	0.567679	0.114543	0.264968	-0.121863
GSE96760_H-STS_Bortezomib.0.02.24	0.0681536	0.0681536	0.0681536	-0.0126653	0.0681536	0.444304	0.534413
GSE96760_H-STS_Bortezomib.0.02.6	0.114704	0.114704	0.114704	0.325146	0.114704	0.84827	-0.0613668
GSE96760_H-STS_Bortezomib.0.05.6	0.113935	0.113935	0.113935	0.392758	0.113935	0.791275	-0.139711
GSE96760_H-STS_Brefeldin A.0.042.24	0.114463	0.114463	0.114463	0.217961	0.114463	0.444095	0.450362
GSE96760_H-STS_Brefeldin A.0.042.6	0.112192	0.112192	0.112192	0.311819	0.112192	0.498997	0.161434
GSE96760_H-STS_Brivanib.7.24	0.116279	0.116279	0.116279	0.973967	0.116279	-0.935966	-0.169155
GSE96760_H-STS_Brivanib.7.6	0.11127	0.11127	0.11127	-0.0747907	0.11127	-0.367907	0.0388276
GSE96760_H-STS_BYL719.19.4.24	0.111821	0.111821	0.111821	0.0135856	0.111821	0.111821	0.111821
GSE96760_H-STS_BYL719.19.4.6	0.111493	0.111493	0.111493	0.174526	0.111493	0.111493	0.111493
GSE96760_H-STS_CAY10618.7.4.24	0.112749	0.112749	0.112749	0.349968	0.112749	0.112749	0.112749
GSE96760_H-STS_CAY10618.7.4.6	0.111697	0.111697	0.111697	0.136502	0.111697	0.111697	0.111697
GSE96760_H-STS_CD-437.0.236.24	0.114712	0.114712	0.114712	0.337011	0.114712	-0.106217	-0.0403085
GSE96760_H-STS_CD-437.0.236.6	0.113405	0.113405	0.113405	-0.375814	0.113405	0.275721	-0.41958
GSE96760_H-STS_Cerulenin.0.68.24	0.115683	0.115683	0.115683	0.466162	0.115683	0.251406	0.221331
GSE96760_H-STS_Cerulenin.0.68.6	0.114594	0.114594	0.114594	0.745213	0.114594	0.337868	0.195328
GSE96760_H-STS_CHM-1.0.084.24	0.115652	0.115652	0.115652	0.799709	0.115652	-0.479424	0.0107084
GSE96760_H-STS_CHM-1.0.084.6	0.114403	0.114403	0.114403	0.867576	0.114403	0.180366	0.0331527
GSE96760_H-STS_Ciclopirox.3.24	0.112758	0.112758	0.112758	0.221929	0.112758	0.112758	0.112758
GSE96760_H-STS_Ciclopirox.5.24	0.218206	0.218206	0.218206	0.543839	0.218206	0.108745	0.115283
GSE96760_H-STS_Ciclopirox.5.6	0.113973	0.113973	0.113973	0.672735	0.113973	0.501633	0.944498
GSE96760_H-STS_Crizotinib.0.48.24	0.11255	0.11255	0.11255	-0.269341	0.11255	0.29664	0.292246
GSE96760_H-STS_Crizotinib.0.48.6	0.111027	0.111027	0.111027	-0.150582	0.111027	-0.288961	0.392843
GSE96760_H-STS_Dasatinib.0.004.24	0.113935	0.113935	0.113935	0.319813	0.113935	0.613799	0.348237
GSE96760_H-STS_Dasatinib.0.004.6	0.114192	0.114192	0.114192	0.987173	0.114192	0.338602	0.406185
GSE96760_H-STS_DBeQ.1.6.24	0.113607	0.113607	0.113607	0.663878	0.113607	0.44515	0.207035
GSE96760_H-STS_DBeQ.1.6.6	0.112488	0.112488	0.112488	0.497883	0.112488	0.29964	-0.0980529
GSE96760_H-STS_Dinaciclib.0.009.24	0.112756	0.112756	0.112756	-0.283108	0.112756	0.968277	1.31605
GSE96760_H-STS_Dinaciclib.0.009.6	0.116475	0.116475	0.116475	0.33096	0.116475	0.556953	0.756222
GSE96760_H-STS_Docetaxel.0.002.24	0.113236	0.113236	0.113236	0.617513	0.113236	1.28518	0.523142
GSE96760_H-STS_Docetaxel.0.002.6	0.113718	0.113718	0.113718	0.455586	0.113718	-0.419385	0.586583
GSE96760_H-STS_Doxorubicin.0.008.24	0.113186	0.113186	0.113186	0.277699	0.113186	1.16906	1.16371
GSE96760_H-STS_Doxorubicin.0.008.6	0.113795	0.113795	0.113795	0.862023	0.113795	0.095781	0.517363
GSE96760_H-STS_Entinostat.0.684.24	0.108873	0.108873	0.108873	0.14101	0.108873	0.14452	-0.0892158
GSE96760_H-STS_Entinostat.0.684.6	0.110194	0.110194	0.110194	0.328242	0.110194	0.277099	0.365107
GSE96760_H-STS_Entinostat.6.84.24	0.109059	0.109059	0.109059	0.125056	0.109059	0.117247	-0.0926595
GSE96760_H-STS_Entinostat.6.84.6	0.109033	0.109033	0.109033	0.259919	0.109033	0.160537	0.189274
GSE96760_H-STS_Epigallocatechin gallate.15.12.24	0.113378	0.113378	0.113378	-0.0946968	0.113378	0.789328	0.698936
GSE96760_H-STS_Epigallocatechin gallate.15.12.6	0.11421	0.11421	0.11421	-0.0414537	0.11421	0.787814	0.423648
GSE96760_H-STS_Erastin.10.24	0.0269227	0.0269227	0.0269227	0.109287	0.0269227	0.334699	0.514151
GSE96760_H-STS_Erastin.10.6	0.112966	0.112966	0.112966	0.377054	0.112966	0.799175	0.830284
GSE96760_H-STS_Erastin.15.24	0.111331	0.111331	0.111331	0.0641534	0.111331	0.952999	1.01742
GSE96760_H-STS_Erastin.15.6	0.110472	0.110472	0.110472	0.474689	0.110472	1.04167	1.01879
GSE96760_H-STS_Ethanol.24	0.113477	0.113477	0.113477	-0.130989	0.113477	0.113477	0.113477
GSE96760_H-STS_Ethanol.6	0.113213	0.113213	0.113213	0.476273	0.113213	0.113213	0.113213
GSE96760_H-STS_Fingolimod.4.24	0.11417	0.11417	0.11417	0.561117	0.11417	1.03863	0.818923
GSE96760_H-STS_Fingolimod.4.6	0.113938	0.113938	0.113938	0.505599	0.113938	0.772814	0.179938
GSE96760_H-STS_FK866.20.24	0.114195	0.114195	0.114195	0.0414348	0.114195	-0.358676	-0.0343847
GSE96760_H-STS_FK866.20.6	0.113834	0.113834	0.113834	-0.0715758	0.113834	0.234349	-0.402588
GSE96760_H-STS_Flavopiridol.0.048.24	0.113882	0.113882	0.113882	0.251406	0.113882	0.748149	0.401983
GSE96760_H-STS_Flavopiridol.0.048.6	0.113741	0.113741	0.113741	0.583023	0.113741	0.455586	0.16658
GSE96760_H-STS_Fluvastatin.0.76.24	0.113459	0.113459	0.113459	1.1324	0.113459	0.36646	0.238243
GSE96760_H-STS_Fluvastatin.0.76.6	0.113236	0.113236	0.113236	0.700332	0.113236	0.379938	0.127782
GSE96760_H-STS_Foretinib.0.214.24	0.113795	0.113795	0.113795	0.312787	0.113795	0.454106	0.00657487
GSE96760_H-STS_Foretinib.0.214.6	0.112958	0.112958	0.112958	0.143747	0.112958	0.0875844	-0.0178024
GSE96760_H-STS_GDC-0941.0.05.24	0.114272	0.114272	0.114272	1.23056	0.114272	0.790269	0.23074
GSE96760_H-STS_GDC-0941.0.05.6	0.112455	0.112455	0.112455	0.453537	0.112455	0.434128	0.395021
GSE96760_H-STS_Gemcitabine.0.05.24	0.0617439	0.0617439	0.0617439	0.100374	0.0617439	0.308286	0.518702
GSE96760_H-STS_Gemcitabine.0.05.6	0.114921	0.114921	0.114921	0.308869	0.114921	0.646633	0.523901
GSE96760_H-STS_Gemcitabine.0.15.24	0.112002	0.112002	0.112002	-0.0764183	0.112002	0.567866	0.686963
GSE96760_H-STS_Gemcitabine.0.15.6	0.114073	0.114073	0.114073	0.00565533	0.114073	0.634769	0.825377
GSE96760_H-STS_Gossypol.4.44.24	0.1131	0.1131	0.1131	0.662744	0.1131	0.252273	0.396332
GSE96760_H-STS_Gossypol.4.44.6	0.113169	0.113169	0.113169	0.313093	0.113169	-0.516904	0.294425
GSE96760_H-STS_GSK1210151A.0.88.24	0.0669411	0.0669411	0.0669411	0.144014	0.0669411	0.355056	0.117096
GSE96760_H-STS_GSK1210151A.0.88.6	0.115086	0.115086	0.115086	0.439725	0.115086	0.356792	-0.579826
GSE96760_H-STS_GSK1210151A.1.32.24	0.115072	0.115072	0.115072	0.429969	0.115072	0.517509	-0.12277
GSE96760_H-STS_GSK1210151A.1.32.6	0.114619	0.114619	0.114619	0.321107	0.114619	0.383696	-0.555285
GSE96760_H-STS_GSK461364.0.01.24	-0.0304882	-0.0304882	-0.0304882	0.0746506	-0.0304882	0.34092	0.412595
GSE96760_H-STS_GSK461364.0.01.6	0.113688	0.113688	0.113688	-0.144649	0.113688	0.424551	0.072435
GSE96760_H-STS_GSK461364.0.05.24	0.11183	0.11183	0.11183	0.439725	0.11183	0.932583	0.90845
GSE96760_H-STS_GSK461364.0.05.6	0.113725	0.113725	0.113725	0.317404	0.113725	0.360747	0.0974131
GSE96760_H-STS_GW-405833.5.4.24	0.113136	0.113136	0.113136	0.00802894	0.113136	0.169563	0.30036
GSE96760_H-STS_GW-405833.5.4.6	0.11329	0.11329	0.11329	0.667614	0.11329	-0.278221	0.450922
GSE96760_H-STS_HMN.214.0.1.24	0.115096	0.115096	0.115096	1.04951	0.115096	0.502918	0.228339
GSE96760_H-STS_HMN.214.0.1.6	0.113622	0.113622	0.113622	0.527263	0.113622	0.187696	0.471774
GSE96760_H-STS_Ibrutinib.2.4.24	0.113273	0.113273	0.113273	0.399297	0.113273	0.767238	0.595103
GSE96760_H-STS_Ibrutinib.2.4.6	0.113781	0.113781	0.113781	0.540531	0.113781	0.295302	0.44495
GSE96760_H-STS_Imatinib.2.24	0.114024	0.114024	0.114024	1.106	0.114024	0.301562	0.291447
GSE96760_H-STS_Imatinib.2.6	0.114965	0.114965	0.114965	0.729145	0.114965	0.235632	0.413237
GSE96760_H-STS_Imatinib.20.24	0.114961	0.114961	0.114961	0.425418	0.114961	0.480113	0.473112
GSE96760_H-STS_Imatinib.20.6	0.114368	0.114368	0.114368	0.347883	0.114368	-0.0369628	-0.0295239
GSE96760_H-STS_INC280.20.24	0.113426	0.113426	0.113426	-0.0776724	0.113426	0.113426	0.113426
GSE96760_H-STS_INC280.20.6	0.113189	0.113189	0.113189	0.939332	0.113189	0.113189	0.113189
GSE96760_H-STS_Istradefylline.20.24	0.113004	0.113004	0.113004	0.343834	0.113004	0.959508	0.613799
GSE96760_H-STS_Istradefylline.20.6	0.114042	0.114042	0.114042	0.257654	0.114042	1.13721	0.424461
GSE96760_H-STS_JNJ-26854165.0.6.24	0.11419	0.11419	0.11419	0.919389	0.11419	0.377623	-0.218204
GSE96760_H-STS_JNJ-26854165.0.6.6	0.113358	0.113358	0.113358	0.243092	0.113358	0.07724	-0.0577837
GSE96760_H-STS_KHS101.1.2.24	0.114067	0.114067	0.114067	0.978746	0.114067	1.00638	0.325912
GSE96760_H-STS_KHS101.1.2.6	0.113296	0.113296	0.113296	0.480372	0.113296	0.291507	0.582648
GSE96760_H-STS_KU-0063794.0.04.24	0.11263	0.11263	0.11263	-0.217269	0.11263	0.11263	0.11263
GSE96760_H-STS_KU-0063794.0.04.6	0.114075	0.114075	0.114075	-0.395417	0.114075	-0.907714	0.0330807
GSE96760_H-STS_KW 2449.5.52.24	0.112031	0.112031	0.112031	-0.00340829	0.112031	0.721231	1.01879
GSE96760_H-STS_KW 2449.5.52.6	0.115108	0.115108	0.115108	0.34845	0.115108	0.367392	0.546839
GSE96760_H-STS_KX2-391.0.024.24	0.113983	0.113983	0.113983	0.798086	0.113983	1.13941	0.437177
GSE96760_H-STS_KX2-391.0.024.6	0.112883	0.112883	0.112883	-0.0626581	0.112883	0.141498	-0.363317
GSE96760_H-STS_LDK378.2.8.24	0.112488	0.112488	0.112488	0.195637	0.112488	0.112488	0.112488
GSE96760_H-STS_LDK378.2.8.6	0.113144	0.113144	0.113144	0.407691	0.113144	0.113144	0.113144
GSE96760_H-STS_LEE011.26.32.24	0.112908	0.112908	0.112908	0.184782	0.112908	0.112908	0.112908
GSE96760_H-STS_LEE011.26.32.6	0.113023	0.113023	0.113023	0.507826	0.113023	0.113023	0.113023
GSE96760_H-STS_Leptomycin B in Ethanol.0.00012.24	0.113686	0.113686	0.113686	0.505456	0.113686	0.113686	0.113686
GSE96760_H-STS_Leptomycin B in Ethanol.0.00012.6	0.11326	0.11326	0.11326	0.0199446	0.11326	0.11326	0.11326
GSE96760_H-STS_Linifanib.5.24	0.112036	0.112036	0.112036	-0.379735	0.112036	0.811972	1.45629
GSE96760_H-STS_Linifanib.5.6	0.114189	0.114189	0.114189	0.128974	0.114189	0.597218	0.514297
GSE96760_H-STS_LY-2183240.0.64.24	0.113058	0.113058	0.113058	-0.573889	0.113058	0.113058	0.113058
GSE96760_H-STS_LY-2183240.0.64.6	0.114011	0.114011	0.114011	-0.283788	0.114011	-0.861294	-0.163133
GSE96760_H-STS_Manumycin A.4.32.24	0.113731	0.113731	0.113731	-0.927871	0.113731	1.10193	0.592352
GSE96760_H-STS_Manumycin A.4.32.6	0.113397	0.113397	0.113397	-0.640259	0.113397	0.113397	0.113397
GSE96760_H-STS_Methanol.24	0.11358	0.11358	0.11358	-0.167224	0.11358	0.11358	0.11358
GSE96760_H-STS_Methanol.6	0.113347	0.113347	0.113347	-0.0778935	0.113347	0.113347	0.113347
GSE96760_H-STS_Methylstat.0.072.24	0.113987	0.113987	0.113987	-0.366857	0.113987	0.501194	0.164803
GSE96760_H-STS_Methylstat.0.072.6	0.116094	0.116094	0.116094	0.573394	0.116094	-0.108961	0.458694
GSE96760_H-STS_Methylstat.0.72.24	0.113115	0.113115	0.113115	-0.046763	0.113115	0.727624	0.325974
GSE96760_H-STS_Methylstat.0.72.6	0.115184	0.115184	0.115184	0.243	0.115184	0.0378499	-0.147534
GSE96760_H-STS_MG-132.0.25.24	0.113834	0.113834	0.113834	0.90845	0.113834	1.17661	0.696904
GSE96760_H-STS_MG-132.0.25.6	0.113815	0.113815	0.113815	0.16222	0.113815	0.545831	-0.231888
GSE96760_H-STS_Mithramycin A.0.024.24	0.113187	0.113187	0.113187	0.154269	0.113187	0.864799	0.570676
GSE96760_H-STS_Mithramycin A.0.024.6	0.112555	0.112555	0.112555	-0.0798851	0.112555	0.274553	-0.506844
GSE96760_H-STS_Mitomycin C.0.44.24	0.113186	0.113186	0.113186	-0.112812	0.113186	1.106	1.194
GSE96760_H-STS_Mitomycin C.0.44.6	0.112805	0.112805	0.112805	-0.379271	0.112805	-0.121366	-0.0248716
GSE96760_H-STS_MK-1775.0.08.24	0.113694	0.113694	0.113694	0.396332	0.113694	0.308051	0.230354
GSE96760_H-STS_MK-1775.0.08.6	0.113213	0.113213	0.113213	0.625145	0.113213	-0.168507	-0.221247
GSE96760_H-STS_MK-2206.0.684.24	0.11438	0.11438	0.11438	-0.00949519	0.11438	0.393669	0.555384
GSE96760_H-STS_MK-2206.0.684.6	0.11397	0.11397	0.11397	0.546504	0.11397	-0.0104946	0.0834931
GSE96760_H-STS_MK-2206.6.84.24	0.113752	0.113752	0.113752	-0.101807	0.113752	0.197013	0.18986
GSE96760_H-STS_MK-2206.6.84.6	0.113686	0.113686	0.113686	0.529432	0.113686	0.0266046	0.179938
GSE96760_H-STS_ML210.0.04.24	0.112998	0.112998	0.112998	-0.153968	0.112998	0.711031	0.380887
GSE96760_H-STS_ML210.0.04.6	0.112541	0.112541	0.112541	0.148278	0.112541	-0.25177	-0.0811756
GSE96760_H-STS_MST-312.1.68.24	0.114577	0.114577	0.114577	0.656605	0.114577	0.215488	-0.252878
GSE96760_H-STS_MST-312.1.68.6	0.112889	0.112889	0.112889	0.340531	0.112889	0.422992	0.159308
GSE96760_H-STS_Necrosulfonamide.4.24	0.11321	0.11321	0.11321	-0.0357465	0.11321	0.738568	0.485772
GSE96760_H-STS_Necrosulfonamide.4.6	0.110768	0.110768	0.110768	-0.152049	0.110768	0.428274	0.145581
GSE96760_H-STS_Neratinib.0.25.24	0.113923	0.113923	0.113923	0.704979	0.113923	-0.0700511	0.189816
GSE96760_H-STS_Neratinib.0.25.6	0.11359	0.11359	0.11359	0.413788	0.11359	0.178764	0.0224286
GSE96760_H-STS_NIlotinib.7.68.24	0.112108	0.112108	0.112108	-0.044967	0.112108	0.112108	0.112108
GSE96760_H-STS_NIlotinib.7.68.6	0.112555	0.112555	0.112555	-0.0741967	0.112555	0.112555	0.112555
GSE96760_H-STS_Nutlin-3.0.84.24	0.113577	0.113577	0.113577	0.488795	0.113577	1.20564	0.862023
GSE96760_H-STS_Nutlin-3.0.84.6	0.114148	0.114148	0.114148	-0.132678	0.114148	0.757146	0.50335
GSE96760_H-STS_NVP-231.0.028.24	0.113583	0.113583	0.113583	-0.0435428	0.113583	0.34845	0.274973
GSE96760_H-STS_NVP-231.0.028.6	0.114274	0.114274	0.114274	0.386665	0.114274	0.259919	0.35778
GSE96760_H-STS_NVP-231.0.27.24	0.113921	0.113921	0.113921	0.174118	0.113921	0.384834	0.242625
GSE96760_H-STS_NVP-231.0.27.6	0.113201	0.113201	0.113201	0.0622884	0.113201	-0.270217	0.0447359
GSE96760_H-STS_Obatoclax.0.068.24	0.114523	0.114523	0.114523	0.724572	0.114523	0.583418	0.17487
GSE96760_H-STS_Obatoclax.0.068.6	0.114234	0.114234	0.114234	0.341251	0.114234	-0.115718	-0.474536
GSE96760_H-STS_Obatoclax.0.68.24	0.114055	0.114055	0.114055	0.519294	0.114055	0.814828	0.346905
GSE96760_H-STS_Obatoclax.0.68.6	0.11499	0.11499	0.11499	0.570113	0.11499	0.359135	-0.0194011
GSE96760_H-STS_PAC-1.4.24	0.110832	0.110832	0.110832	-0.141271	0.110832	0.199682	0.398606
GSE96760_H-STS_PAC-1.4.6	0.11385	0.11385	0.11385	0.466162	0.11385	-0.120116	-0.395417
GSE96760_H-STS_Paclitaxel.0.003.24	0.113333	0.113333	0.113333	0.438439	0.113333	1.04325	0.424551
GSE96760_H-STS_Paclitaxel.0.003.6	0.113686	0.113686	0.113686	0.248387	0.113686	0.538307	0.356136
GSE96760_H-STS_Panobinostat.0.005.24	0.111928	0.111928	0.111928	0.381752	0.111928	0.695878	0.443882
GSE96760_H-STS_Panobinostat.0.005.6	0.112515	0.112515	0.112515	0.124385	0.112515	0.440907	-0.073592
GSE96760_H-STS_Parbendazole.0.054.24	0.113364	0.113364	0.113364	0.387426	0.113364	0.461654	0.35853
GSE96760_H-STS_Parbendazole.0.054.6	0.114075	0.114075	0.114075	0.321762	0.114075	0.467433	0.235415
GSE96760_H-STS_Parthenolide.0.8.24	0.113542	0.113542	0.113542	0.208007	0.113542	0.644567	0.518702
GSE96760_H-STS_Parthenolide.0.8.6	0.114111	0.114111	0.114111	0.364954	0.114111	0.599916	0.133293
GSE96760_H-STS_PF-3758309.0.008.24	0.113526	0.113526	0.113526	0.49314	0.113526	0.305085	-0.207031
GSE96760_H-STS_PF-3758309.0.008.6	0.114046	0.114046	0.114046	0.0958578	0.114046	-0.0790292	-0.274482
GSE96760_H-STS_PF-573228.2.08.24	0.11339	0.11339	0.11339	-0.66847	0.11339	0.11339	0.11339
GSE96760_H-STS_PF-573228.2.08.6	0.114362	0.114362	0.114362	-0.0528551	0.114362	-0.288424	-0.0895077
GSE96760_H-STS_PHA-665752.2.88.24	0.114495	0.114495	0.114495	0.546002	0.114495	0.584027	-0.0772092
GSE96760_H-STS_PHA-665752.2.88.6	0.114794	0.114794	0.114794	0.339196	0.114794	0.648497	-0.448033
GSE96760_H-STS_Piperlongumine.1.04.24	0.112944	0.112944	0.112944	0.149	0.112944	1.35588	0.314016
GSE96760_H-STS_Piperlongumine.1.04.6	0.113921	0.113921	0.113921	0.734217	0.113921	0.113921	0.113921
GSE96760_H-STS_PKC412.2.84.24	0.112062	0.112062	0.112062	-0.116934	0.112062	0.112062	0.112062
GSE96760_H-STS_PKC412.2.84.6	0.112242	0.112242	0.112242	0.0502177	0.112242	0.112242	0.112242
GSE96760_H-STS_Pluripotin.0.004.24	0.113421	0.113421	0.113421	-0.371267	0.113421	0.113421	0.113421
GSE96760_H-STS_Pluripotin.0.005.24	0.359397	0.359397	0.359397	0.124681	0.359397	0.105598	0.24084
GSE96760_H-STS_Pluripotin.0.005.6	0.114087	0.114087	0.114087	0.0670572	0.114087	-0.273208	0.216147
GSE96760_H-STS_RAD001.5.88.24	0.111716	0.111716	0.111716	0.138955	0.111716	0.111716	0.111716
GSE96760_H-STS_RAD001.5.88.6	0.111848	0.111848	0.111848	0.32922	0.111848	0.111848	0.111848
GSE96760_H-STS_Rigosertib.0.1.24	0.114649	0.114649	0.114649	-0.199013	0.114649	0.669407	0.187868
GSE96760_H-STS_Rigosertib.0.1.6	0.114026	0.114026	0.114026	0.354756	0.114026	0.15506	-0.0342351
GSE96760_H-STS_Rosiglitazone.20.24	0.113106	0.113106	0.113106	0.342336	0.113106	0.784334	0.306294
GSE96760_H-STS_Rosiglitazone.20.6	0.114507	0.114507	0.114507	0.172455	0.114507	0.458227	0.54468
GSE96760_H-STS_SB-225002.0.25.24	0.113964	0.113964	0.113964	0.199682	0.113964	0.965012	0.245172
GSE96760_H-STS_SB-225002.0.25.6	0.113516	0.113516	0.113516	-0.0781242	0.113516	0.806211	0.133582
GSE96760_H-STS_SB-743921.0.0004.24	0.112728	0.112728	0.112728	0.251265	0.112728	0.821828	0.530891
GSE96760_H-STS_SB-743921.0.0004.6	0.114183	0.114183	0.114183	0.875686	0.114183	0.348099	0.0733423
GSE96760_H-STS_SCH-529074.0.48.24	0.112881	0.112881	0.112881	0.0515388	0.112881	0.577653	0.450922
GSE96760_H-STS_SCH-529074.0.48.6	0.113503	0.113503	0.113503	0.0077531	0.113503	0.511246	-0.0130493
GSE96760_H-STS_SCH-79797.0.06.24	0.113752	0.113752	0.113752	-0.970273	0.113752	0.113752	0.113752
GSE96760_H-STS_SCH-79797.0.06.6	0.114292	0.114292	0.114292	0.0911184	0.114292	0.479239	-0.0697725
GSE96760_H-STS_SNX-2112.0.006.24	0.111965	0.111965	0.111965	0.324331	0.111965	0.28585	0.0566797
GSE96760_H-STS_SNX-2112.0.006.6	0.113546	0.113546	0.113546	0.46568	0.113546	-0.0152857	0.356792
GSE96760_H-STS_SNX-2112.0.066.24	0.113563	0.113563	0.113563	0.430845	0.113563	0.428076	-0.0847358
GSE96760_H-STS_SNX-2112.0.066.6	0.113699	0.113699	0.113699	0.798086	0.113699	0.199045	0.645622
GSE96760_H-STS_Sorafenib.3.72.24	-0.0317545	-0.0317545	-0.0317545	0.0855575	-0.0317545	0.218808	0.497883
GSE96760_H-STS_Sorafenib.3.72.6	0.113837	0.113837	0.113837	0.445997	0.113837	0.324773	0.731442
GSE96760_H-STS_SU11274.1.52.24	0.112578	0.112578	0.112578	-0.121651	0.112578	0.112578	0.112578
GSE96760_H-STS_SU11274.1.52.6	0.112455	0.112455	0.112455	-0.237668	0.112455	0.112455	0.112455
GSE96760_H-STS_Sunitinib.0.176.24	0.113374	0.113374	0.113374	0.264771	0.113374	0.141876	0.0282116
GSE96760_H-STS_Sunitinib.0.176.6	0.114039	0.114039	0.114039	0.643512	0.114039	0.211161	0.457771
GSE96760_H-STS_Sunitinib.1.76.24	0.113605	0.113605	0.113605	0.176691	0.113605	0.534739	0.245494
GSE96760_H-STS_Sunitinib.1.76.6	0.115176	0.115176	0.115176	0.189456	0.115176	0.0523866	0.393332
GSE96760_H-STS_Tivantinib.0.0709.24	0.113746	0.113746	0.113746	-0.983557	0.113746	-0.2107	0.363921
GSE96760_H-STS_Tivantinib.0.0709.6	0.114751	0.114751	0.114751	0.98245	0.114751	0.68565	0.0788421
GSE96760_H-STS_Tivantinib.0.709.24	0.112075	0.112075	0.112075	-0.0602286	0.112075	1.00638	0.987173
GSE96760_H-STS_Tivantinib.0.709.6	0.115797	0.115797	0.115797	0.782364	0.115797	0.35571	-0.0719055
GSE96760_H-STS_Topotecan.0.00138.24	0.114582	0.114582	0.114582	-0.579826	0.114582	1.26949	0.737372
GSE96760_H-STS_Topotecan.0.00138.6	0.115155	0.115155	0.115155	0.836706	0.115155	0.526325	0.0941766
GSE96760_H-STS_Topotecan.0.0138.24	0.113884	0.113884	0.113884	-0.0284773	0.113884	0.854413	0.950869
GSE96760_H-STS_Topotecan.0.0138.6	0.114416	0.114416	0.114416	0.32508	0.114416	0.825377	0.778996
GSE96760_H-STS_TW-37.4.24	-0.0265226	-0.0265226	-0.0265226	0.107519	-0.0265226	0.380258	0.469854
GSE96760_H-STS_TW-37.4.6	0.113983	0.113983	0.113983	0.176825	0.113983	-0.395589	-0.367907
GSE96760_H-STS_Vincristine.0.0008.24	0.112691	0.112691	0.112691	0.0879165	0.112691	0.382959	0.305377
GSE96760_H-STS_Vincristine.0.0008.6	0.114442	0.114442	0.114442	0.35564	0.114442	0.955069	0.521734
GSE96760_H-STS_Vorinostat.0.2.24	-0.0399695	-0.0399695	-0.0399695	0.109016	-0.0399695	0.368143	0.41712
GSE96760_H-STS_Vorinostat.0.2.6	0.113076	0.113076	0.113076	0.182009	0.113076	0.658303	0.25088
GSE96760_H-STS_Y-27632.3.36.24	0.114014	0.114014	0.114014	0.251115	0.114014	-0.0816884	0.0250904
GSE96760_H-STS_Y-27632.3.36.6	0.112762	0.112762	0.112762	-0.227442	0.112762	0.112762	0.112762
GSE96760_H-STS_YK-4-279.0.065.24	0.11414	0.11414	0.11414	-0.117553	0.11414	0.40928	0.431354
GSE96760_H-STS_YK-4-279.0.065.6	0.115099	0.115099	0.115099	1.12803	0.115099	0.0944954	0.38709
GSE96760_H-STS_YK-4-279.0.65.24	0.112876	0.112876	0.112876	0.0857707	0.112876	1.14173	0.992208
GSE96760_H-STS_YK-4-279.0.65.6	0.11539	0.11539	0.11539	0.890253	0.11539	0.697256	0.252747
GSE96760_H-STS_YM-155.0.00006.24	0.112852	0.112852	0.112852	0.0412194	0.112852	0.339473	-0.0921111
GSE96760_H-STS_YM-155.0.00006.6	0.113987	0.113987	0.113987	-0.0174527	0.113987	-0.0766836	-0.132103
GSE96760_H-STS_YM-155.0.0007.24	0.113062	0.113062	0.113062	0.261358	0.113062	0.618443	0.172627
GSE96760_H-STS_YM-155.0.0007.6	0.122318	0.122318	0.122318	0.114419	0.122318	-0.915182	0.290144
GSE96792_Hep3B_Sorafenib	0.664964	0.449311	-0.0136486	0.110713	1.11239	-0.0145417	0.096061
GSE96793_HepG2_Sorafenib	-0.0399406	0.0223258	-0.0773869	-0.371865	-0.39834	0.0995057	0.138438
GSE96794_Huh7_Sorafenib	0.15094	0.0776064	0.107826	0.537044	0.595743	0.221416	0.136612
GSE97985_L363_MS275	-0.00441744	0.111256	0.0325823	0.735768	0.067797	0.061581	0.0584622
GSE97985_L363_Rapamycin	-0.231473	0.0128422	0.0158854	0.900612	-0.356836	-0.0202193	0.0859242
GSE97985_L363_Rapamycin+MS275	0.0421842	0.296079	0.0725384	0.756222	-0.241521	0.142745	0.107139
GSE98230_A2780_5-FdU-ECyd.12H	0.0179131	0.219953	0.215611	0.209648	0.260261	0.54468	0.207926
GSE98230_A2780_5-FdU-ECyd.6H	0.611208	0.388863	0.447991	0.00219054	0.315355	-0.109473	0.111792
GSE98230_A2780R_5-FdU-ECyd.12H	0.374316	0.553822	0.451246	0.487759	1.25831	0.767238	0.112603
GSE98230_A2780R_5-FdU-ECyd.6H	0.522378	0.554347	0.491039	0.237889	1.35588	0.832126	0.112617
GSE99060_M361_abemaciclib	0.464414	0.275878	0.556784	0.452671	0.336026	0.260744	0.112923
GSE99060_M453_abemaciclib	0.652946	1.33003	0.919389	0.970668	1.17409	-0.0154621	0.112966
GSE99060_MCF_abemaciclib	0.523603	0.312663	0.576669	0.6586	1.068	0.347608	0.112451
GSE99062_PDX_abemaciclib	-1.12654	-0.033867	-0.73735	-0.585035	-0.277974	-0.0474871	0.113558
GSE99536_MDAMB231_MMS.24h	-0.155149	-0.110978	-0.164495	-0.109798	0.0466464	-0.00154855	-0.271911
GSE99536_MDAMB231_MMS.8h	0.0449111	0.0106287	0.148713	0.0179131	-0.0504247	0.316656	-0.0380281
GSE99536_MDAMB231_MMS+Sorafenib.24h	-0.108961	-0.0956593	-0.0923662	-0.033248	0.205772	-0.285398	-0.385137
GSE99536_MDAMB231_MMS+Sorafenib.8h	0.307622	0.303616	0.361308	0.192294	0.374392	-0.258422	-0.158254
GSE99536_MDAMB231_Sorafenib.24h	0.00470393	0.189668	0.187488	0.715546	0.304967	-0.935966	-0.263107
GSE99536_MDAMB231_Sorafenib.8h	0.328884	0.454546	0.502356	0.552574	0.737372	-0.763757	-0.243316
