# Supplementary material for: Therapeutically Increasing MHC-I Expression Potentiates Immune Checkpoint Blockade
Source: Oxford University Press journal article supplement (doi:10.1158/2159-8290.cd-20-0812), 2021-02-15
Supplement: 21598290cd200812-sup-244871_3_supp_6826080_qmj3gs.xlsx [file 21598290cd200812-sup-244871_3_supp_6826080_qmj3gs.xlsx]

## Sheet: SMAC_ICB_rawcount
	S1_CRRA200003562-1a_HT7L3DSXX_L2_1.fq	S10_CRRA200003571-1a_HT7L3DSXX_L2_1.fq	S11_CRRA200003572-1a_HT7L3DSXX_L2_1.fq	S12_CRRA200003573-1a_HTYNHDSXX_L1_1.fq	S13_CRRA200003574-1a_HT7L3DSXX_L1_1.fq	S14_CRRA200003575-1a_HT7L3DSXX_L1_1.fq	S15_CRRA200003576-1a_HTYNHDSXX_L1_1.fq	S16_CRRA200003577-1a_HT7L3DSXX_L1_1.fq	S2_CRRA200003563-1a_HT7L3DSXX_L2_1.fq	S3_CRRA200005704-1a_HV572DSXX_L2_1.fq	S4_CRRA200003565-1a_HT7L3DSXX_L2_1.fq	S5_CRRA200003566-1a_HT7L3DSXX_L2_1.fq	S6_CRRA200003567-1a_HT7L3DSXX_L2_1.fq	S7_CRRA200003568-1a_HT7L3DSXX_L2_1.fq	S8_CRRA200003569-1a_HT7L3DSXX_L2_1.fq	S9_CRRA200003570-1a_HT7L3DSXX_L2_1.fq
	87059	86366	87093	97657	77965	83061	142335	100982	118388	138834	101003	60680	102296	115131	145805	126820
0610005C13Rik	3	8	0	8	8	2	3	2	1	11	11	6	2	6	4	5
0610009B22Rik	242	318	336	510	446	280	274	253	266	414	206	312	490	396	343	391
0610009E02Rik	12	28	7	42	30	2	0	12	8	11	8	10	19	23	12	10
0610009L18Rik	26	36	26	46	35	25	17	10	20	35	8	21	20	16	12	31
0610010F05Rik	402	471	594	799	810	465	635	510	514	492	564	532	596	663	610	636
0610010K14Rik	381	647	543	790	677	536	582	531	429	659	385	517	792	650	610	557
0610012G03Rik	654	1028	837	1001	1046	692	869	749	640	1064	679	777	1249	1073	778	859
0610030E20Rik	934	729	809	1589	1005	736	844	716	747	821	824	965	747	829	980	1335
0610038B21Rik	26	34	47	37	62	14	19	21	22	39	31	34	43	44	32	34
0610040B10Rik	8	9	16	20	15	7	2	2	7	15	8	12	8	10	1	4
0610040J01Rik	0	2	6	2	2	2	8	11	0	5	0	5	0	3	7	0
1010001B22Rik	0	1	3	5	1	1	4	1	0	1	4	4	1	4	1	1
1110002E22Rik	1	4	4	18	14	4	11	16	5	18	3	8	4	12	57	13
1110002J07Rik	2	8	6	15	11	6	4	2	3	13	10	9	2	3	1	12
1110002L01Rik	247	162	406	490	360	270	329	315	334	679	268	383	620	588	344	382
1110003F10Rik	0	2	0	2	1	1	2	0	0	3	3	3	1	0	2	3
1110004F10Rik	2249	2493	2887	4056	3619	2143	2986	2593	2489	3871	1963	2895	4919	4335	2910	3075
1110006O24Rik	25	19	21	34	27	21	25	13	14	21	9	17	11	18	16	23
1110008P14Rik	309	544	485	671	589	379	567	535	366	780	432	580	871	779	562	517
1110012L19Rik	179	205	169	329	262	173	182	201	137	356	161	242	350	241	169	233
1110013H19Rik	1	18	11	15	11	9	6	9	7	8	1	8	11	13	4	8
1110019D14Rik	33	65	72	90	60	71	45	50	62	116	50	37	88	53	49	49
1110020A21Rik	2	9	2	15	2	3	8	5	4	5	8	7	1	4	5	8
1110025M09Rik	15	13	8	22	24	10	4	11	11	25	7	10	12	8	10	27
1110032A03Rik	130	178	136	286	172	103	140	104	139	183	128	169	220	137	148	179
1110035H17Rik	12	12	5	19	20	9	2	7	10	9	19	10	4	7	2	26
1110038B12Rik	711	919	716	1326	950	551	931	660	526	1024	539	766	1001	943	616	857
1110038F14Rik	516	681	555	939	755	584	581	503	621	679	486	544	925	690	608	649
1110046J04Rik	6	3	15	16	15	7	11	3	6	10	4	11	22	26	13	10
1110051M20Rik	398	479	367	753	529	446	438	427	441	507	418	594	587	502	488	534
1110059E24Rik	258	319	354	402	400	304	415	334	292	571	203	366	581	553	360	318
1110059G10Rik	181	293	180	377	317	182	221	200	206	304	189	286	375	339	199	304
1110065P20Rik	445	631	563	675	562	384	528	402	471	798	332	417	930	757	569	589
1190001M18Rik	3	5	7	12	16	9	13	3	5	7	4	5	5	14	12	1
1190005I06Rik	45	62	31	53	72	45	19	45	58	43	33	64	44	47	49	84
1190007I07Rik	146	265	221	297	268	206	185	155	195	290	137	227	353	332	221	259
1300002E11Rik	135	193	189	266	225	187	152	149	197	180	177	205	175	200	191	225
1300014J16Rik	6	1	6	24	5	6	8	6	6	8	6	4	6	4	7	6
1300017J02Rik	4	9	7	2	8	1	0	7	6	12	0	0	0	5	7	3
1500002C15Rik	19	34	14	22	31	13	16	13	21	34	24	13	17	7	12	21
1500002F19Rik	0	2	5	12	5	5	1	4	6	3	2	2	0	2	4	0
1500004A13Rik	88	86	113	285	190	141	108	122	105	97	224	109	33	152	103	207
1500005C15Rik	1	1	0	4	5	4	1	4	0	1	5	0	1	0	0	0
1500009L16Rik	91	108	70	150	76	49	50	39	94	98	105	61	52	63	49	118
1500011B03Rik	126	190	117	260	159	146	172	109	141	137	139	113	151	168	162	206
1500015A07Rik	36	77	66	98	69	52	52	45	31	39	52	39	42	63	39	74
1600002K03Rik	55	99	112	154	111	119	160	120	113	157	69	127	189	141	149	80
1600010M07Rik	0	0	2	2	2	1	2	2	2	6	0	0	7	2	3	0
1600012H06Rik	479	515	526	964	760	423	615	537	472	701	444	587	715	697	607	719
1600014C10Rik	321	378	305	611	452	359	284	309	279	354	346	466	502	437	497	561
1600014C23Rik	47	38	39	46	52	26	2	15	34	46	23	36	51	27	15	37
1600017P15Rik	7	6	3	2	1	1	0	0	3	4	1	0	0	7	1	5
1600020E01Rik	160	147	149	326	198	172	129	101	149	246	167	165	156	232	151	216
1600023N17Rik	0	3	3	1	7	6	0	0	5	5	1	1	2	4	1	5
1700001C19Rik	0	1	3	11	5	2	2	1	1	0	1	1	0	3	1	2
1700001G11Rik	4	6	0	9	3	1	0	3	2	11	5	2	4	4	8	3
1700001G17Rik	8	0	7	4	7	4	5	4	1	10	4	3	7	9	4	4
1700001L05Rik	9	6	11	18	6	13	14	10	3	1	11	9	4	8	7	13
1700001L19Rik	0	1	1	5	1	2	2	2	4	0	0	1	4	0	1	0
1700001O22Rik	1	0	9	0	4	1	2	1	0	0	3	8	0	4	3	2
1700003E16Rik	30	27	49	51	32	30	21	34	21	30	35	52	25	30	23	63
1700003F12Rik	286	479	364	444	535	219	240	216	217	358	310	448	767	587	332	387
1700007K13Rik	11	15	12	38	49	13	30	24	16	23	18	14	14	18	11	49
1700007L15Rik	36	70	44	86	69	40	38	38	42	57	23	46	80	70	32	50
1700008J07Rik	56	54	76	138	106	101	92	70	63	87	59	82	56	73	62	104
1700008O03Rik	5	2	0	3	0	2	1	7	4	3	2	4	3	5	7	2
1700010I14Rik	64	71	77	126	94	67	64	38	100	54	41	67	65	58	58	97
1700012D14Rik	23	13	14	31	17	21	2	11	17	22	24	24	11	13	15	16
1700017B05Rik	471	544	766	1113	828	581	969	801	626	503	582	735	425	785	755	836
1700017J07Rik	4	0	0	0	1	1	3	0	0	4	0	0	2	2	1	1
1700018L02Rik	39	20	46	66	54	33	22	20	56	10	32	39	49	35	41	51
1700019D03Rik	456	326	297	626	464	370	464	318	432	407	194	628	849	740	645	485
1700020D05Rik	7	3	7	6	4	6	2	1	0	4	7	2	4	5	3	5
1700020G03Rik	2	0	2	3	0	1	1	4	0	4	4	0	0	3	0	8
1700020L24Rik	0	0	0	4	4	3	8	4	0	4	2	1	2	0	3	4
1700021F05Rik	286	386	397	619	408	357	540	408	279	398	332	374	465	504	390	345
1700021J08Rik	3	0	0	5	1	2	1	0	0	0	3	1	4	1	1	0
1700022N22Rik	1	7	4	3	1	0	2	0	0	1	0	3	0	3	3	1
1700023B13Rik	18	5	19	23	12	3	4	7	10	10	12	17	2	7	4	21
1700024J04Rik	43	52	40	130	37	46	71	33	25	50	67	32	10	44	25	56
1700025G04Rik	366	371	381	486	351	248	363	320	339	351	423	320	276	361	325	506
1700028E10Rik	22	19	23	29	25	22	10	13	23	11	25	24	8	11	10	23
1700028J19Rik	3	11	7	3	4	10	6	5	2	2	6	3	6	4	4	1
1700029I15Rik	10	15	7	33	14	10	11	6	9	6	8	7	2	5	4	6
1700029J07Rik	13	17	7	17	13	4	8	5	14	5	18	13	6	17	5	13
1700030C10Rik	73	43	69	108	92	47	80	35	68	85	68	54	56	62	58	98
1700030J22Rik	29	8	29	33	23	32	26	27	25	30	26	35	15	17	37	31
1700030K09Rik	291	288	281	469	362	275	244	240	258	281	266	315	332	297	264	331
1700034H15Rik	3	0	0	9	0	0	2	2	4	2	3	1	1	1	1	0
1700034I23Rik	0	1	8	8	8	2	0	0	2	0	7	0	0	2	0	5
1700034P13Rik	22	0	14	11	10	2	7	2	2	4	4	10	16	14	7	21
1700037C18Rik	37	52	31	55	43	50	45	47	38	48	39	43	94	62	54	36
1700037H04Rik	641	982	702	1240	817	805	751	699	773	816	638	745	781	695	757	870
1700040D17Rik	9	13	7	19	3	6	1	9	4	18	5	2	8	8	2	11
1700041G16Rik	1	3	0	0	3	2	0	0	3	3	0	7	6	1	3	2
1700042O10Rik	3	4	6	6	4	22	7	6	13	11	2	8	21	12	5	0
1700047K16Rik	2	0	3	1	0	0	4	0	2	2	2	14	3	0	0	0
1700048M11Rik	1	3	1	2	0	1	0	0	2	3	1	0	2	1	0	2
1700052K11Rik	57	55	37	80	111	56	70	48	55	53	51	65	68	64	54	64
1700055D18Rik	10	5	7	24	15	3	6	7	0	5	15	9	9	11	2	13
1700056E22Rik	8	7	14	6	17	7	2	2	8	9	9	7	17	6	7	10
1700056N10Rik	2	4	3	2	0	2	1	4	1	2	4	3	0	1	5	5
1700060J05Rik	4	0	2	7	1	1	1	2	0	3	3	0	0	0	2	3
1700063D05Rik	6	2	9	6	6	10	8	8	0	4	5	3	5	1	3	8
1700063J08Rik	3	1	1	3	3	3	0	1	0	6	3	7	0	0	0	1
1700065D16Rik	21	9	18	12	24	7	10	12	23	11	13	9	9	16	12	17
1700066B19Rik	1	10	7	23	5	4	10	7	2	8	11	4	16	9	8	10
1700066M21Rik	370	349	402	511	418	308	512	420	287	481	308	442	560	507	429	430
1700067K01Rik	14	14	11	10	11	5	2	2	1	10	7	11	4	5	3	2
1700069B07Rik	8	1	12	21	5	1	6	6	2	6	17	11	4	13	10	22
1700082M22Rik	2	6	7	11	7	6	7	7	4	2	9	8	7	7	4	3
1700084E18Rik	6	21	4	10	8	4	7	14	15	7	6	10	3	6	4	16
1700086O06Rik	85	97	70	137	107	70	32	41	107	101	48	79	66	79	46	78
1700086P04Rik	4	5	5	8	17	3	1	1	10	6	9	11	3	6	3	6
1700087I21Rik	1	0	0	2	2	2	0	2	0	0	7	3	1	3	4	4
1700088E04Rik	49	36	20	79	60	29	23	37	15	44	34	39	68	22	24	44
1700092M07Rik	0	2	1	0	0	2	1	0	4	6	3	2	0	1	2	1
1700096K18Rik	40	25	17	48	32	25	16	14	33	27	20	29	22	13	19	37
1700101I11Rik	4	4	3	6	6	16	5	5	4	1	4	2	8	8	11	6
1700102H20Rik	0	0	0	0	1	1	3	2	3	2	1	2	4	0	1	3
1700102P08Rik	1	4	2	8	2	10	16	4	4	8	9	11	0	5	4	6
1700105P06Rik	8	2	7	10	13	0	7	7	1	10	4	12	21	18	21	11
1700109G14Rik	20	2	15	56	24	37	12	12	15	38	41	53	34	34	36	7
1700109H08Rik	31	2	12	24	12	12	11	9	8	18	16	13	8	18	9	17
1700109K24Rik	1	2	2	13	6	1	2	0	1	3	11	4	0	2	0	7
1700113A16Rik	10	9	13	21	17	14	21	27	6	21	7	12	7	13	9	15
1700120C14Rik	11	6	15	11	11	1	3	2	9	11	7	6	3	1	4	5
1700122E12Rik	2	1	2	1	2	2	2	1	1	6	3	0	2	2	3	1
1700123M08Rik	16	8	12	39	21	17	11	11	5	16	14	28	26	18	14	14
1700123O20Rik	235	382	323	464	405	270	464	328	304	383	301	300	483	442	341	368
1700124L16Rik	7	5	2	3	2	2	4	0	3	1	4	0	1	5	0	1
1700125H20Rik	0	5	3	1	0	1	2	3	1	4	7	2	1	7	2	1
1810009A15Rik	289	348	405	592	449	341	588	412	288	557	318	469	659	616	417	364
1810010H24Rik	31	37	22	26	48	27	10	19	27	11	19	19	36	20	15	39
1810013L24Rik	1027	855	929	1546	1153	872	1005	934	809	833	843	1036	896	931	1017	1287
1810014B01Rik	117	182	127	296	171	170	154	103	142	227	95	133	211	162	132	157
1810019D21Rik	0	0	0	2	0	1	3	2	0	4	1	0	0	3	4	4
1810019N24Rik	3	6	3	0	12	2	3	1	2	7	2	1	0	4	1	5
1810021B22Rik	3	4	7	5	7	12	5	6	0	5	3	3	5	2	5	6
1810024B03Rik	28	36	12	39	37	14	23	29	15	33	24	32	25	21	15	39
1810026B05Rik	190	247	168	386	352	251	164	162	238	280	187	253	185	219	191	264
1810030O07Rik	490	581	635	1038	671	635	683	674	653	708	574	629	690	750	817	841
1810034E14Rik	57	43	53	88	68	94	79	68	75	93	69	97	131	84	74	57
1810037I17Rik	545	1210	888	1427	1056	927	1111	926	825	1716	631	965	1935	1503	1065	911
1810041H14Rik	0	0	1	2	0	1	2	0	1	1	0	0	1	4	0	1
1810044D09Rik	34	74	32	44	48	35	16	13	35	54	29	42	51	33	34	55
1810049J17Rik	108	66	89	110	56	45	92	78	106	36	90	93	86	97	130	102
1810055G02Rik	310	283	311	483	339	238	487	357	313	306	311	279	237	321	327	391
1810058I24Rik	1890	2913	2485	3625	3265	2392	2744	2412	2256	3524	2202	2401	2781	2537	2356	2842
1810059H22Rik	15	9	6	14	7	21	11	8	3	18	9	17	21	9	10	10
1810062G17Rik	15	25	24	42	30	20	18	16	13	32	11	30	32	44	34	24
1810062O18Rik	0	0	3	10	12	5	9	2	1	5	1	2	6	3	1	10
1810065E05Rik	10	4	8	10	5	9	56	16	19	14	3	7	8	13	5	4
2010001A14Rik	12	35	8	33	32	13	9	11	18	37	24	24	43	38	13	11
2010008C14Rik	70	136	87	177	110	102	126	115	92	129	116	123	51	92	109	156
2010016I18Rik	0	0	2	3	2	3	2	2	1	3	1	3	0	8	6	1
2010110K18Rik	4	9	7	11	5	13	5	9	1	19	5	9	2	3	7	9
2010204K13Rik	75	173	120	168	120	103	188	152	118	195	95	92	142	141	100	147
2010300C02Rik	11	26	15	46	22	19	39	17	17	22	16	36	15	10	46	24
2010315B03Rik	157	123	91	277	178	107	124	105	103	220	130	197	215	180	146	193
2010320M18Rik	107	116	99	187	137	86	73	80	101	157	77	118	185	137	90	107
2200002D01Rik	4	12	8	18	8	1	16	0	2	13	2	2	9	10	16	7
2210010C04Rik	1	0	1	0	1	1	1	0	1	6	4	0	0	1	0	0
2210016F16Rik	800	997	961	1300	1126	933	1193	878	924	1063	768	910	1299	1125	1082	1012
2210016L21Rik	434	577	508	855	711	595	572	519	473	595	464	766	859	745	729	689
2210406H18Rik	2	0	3	9	5	3	12	3	0	0	5	6	4	12	2	6
2210406O10Rik	4	3	3	5	10	5	2	2	3	1	1	0	3	1	6	4
2210408F21Rik	179	263	190	312	232	181	167	184	219	361	221	190	291	261	198	257
2210408I21Rik	133	104	146	184	170	99	144	85	104	102	98	126	198	160	151	151
2210412B16Rik	3	0	4	3	2	1	2	1	1	2	6	3	0	7	0	2
2210417A02Rik	13	8	13	29	11	16	4	10	5	15	12	15	28	8	6	15
2210418O10Rik	274	409	460	495	355	292	393	387	220	264	335	122	816	527	289	353
2300009A05Rik	177	219	225	272	279	153	190	233	175	178	154	172	247	244	219	260
2310001H17Rik	1	7	2	4	0	0	1	0	0	2	1	3	4	8	8	0
2310001K24Rik	6	2	3	4	1	1	8	1	0	7	4	11	0	1	0	1
2310009A05Rik	103	194	109	190	180	145	108	95	146	210	126	152	191	140	119	180
2310009B15Rik	184	256	279	293	269	197	249	167	203	307	175	237	274	322	257	245
2310010J17Rik	7	8	8	7	7	9	6	4	4	7	7	6	7	6	7	4
2310011J03Rik	773	1081	902	1297	979	682	882	654	758	1110	574	799	1498	1156	887	960
2310014F06Rik	3	3	1	2	1	1	1	2	0	0	5	2	0	3	6	1
2310015A10Rik	192	192	156	332	316	160	124	110	157	196	173	194	164	138	148	304
2310022A10Rik	440	581	522	672	642	435	547	482	484	507	485	517	437	548	602	670
2310022B05Rik	1585	1513	1533	2368	2446	1378	1497	1270	1577	1177	1308	1749	1102	1702	1868	2062
2310030G06Rik	15	18	24	59	28	37	37	33	16	30	44	22	17	37	19	19
2310033P09Rik	226	376	398	504	469	334	385	345	320	363	278	334	339	348	395	342
2310034G01Rik	0	11	4	13	5	2	0	0	6	10	6	5	4	6	3	11
2310039H08Rik	262	405	373	430	484	246	300	297	303	457	288	334	518	336	270	368
2310040G24Rik	0	0	1	5	3	0	2	1	0	1	2	2	3	6	4	4
2310043M15Rik	1	0	0	1	2	2	1	0	0	0	1	2	5	1	4	0
2310043P16Rik	12	6	20	23	27	3	13	1	5	7	11	15	8	14	19	14
2310057J18Rik	1	0	1	6	1	2	5	4	7	3	2	6	6	10	1	6
2310057M21Rik	386	450	456	702	499	438	474	397	450	407	519	513	430	468	461	587
2310058D17Rik	39	75	51	106	63	37	43	36	65	90	52	67	42	71	38	71
2310061I04Rik	471	648	571	881	807	618	711	637	537	611	509	642	545	689	689	674
2310068J16Rik	45	27	28	66	60	39	39	23	30	39	30	38	36	30	37	55
2310069B03Rik	15	19	19	32	30	38	18	12	13	36	22	38	60	83	28	17
2410002F23Rik	1364	1099	1297	2702	1567	1011	1531	1201	1187	1286	1092	1305	1288	1460	1126	1560
2410004B18Rik	243	424	425	663	393	415	576	447	351	559	308	365	644	569	463	437
2410004P03Rik	1	1	5	5	4	4	4	10	1	0	4	6	3	1	1	5
2410006H16Rik	1183	1908	1072	2266	1637	1134	842	900	1187	2488	624	2179	3516	2136	1349	1305
2410022M11Rik	68	73	63	86	94	21	40	43	65	73	33	70	59	73	44	52
2410131K14Rik	476	528	653	817	582	487	685	578	595	557	456	652	521	582	654	748
2500002B13Rik	35	53	51	84	103	42	25	42	21	64	72	73	66	68	57	76
2500004C02Rik	9	27	24	39	56	14	22	33	13	30	31	17	25	23	17	34
2510002D24Rik	4	2	1	4	4	2	6	2	0	2	1	7	2	4	20	3
2510009E07Rik	393	301	367	680	533	313	382	378	296	261	384	452	251	440	538	580
2510016D11Rik	3	6	4	12	11	5	5	9	0	3	9	5	3	4	8	6
2510017J16Rik	3	0	3	8	5	1	6	2	1	3	0	1	0	0	1	4
2510039O18Rik	1619	1658	1830	2590	2273	1520	2003	1713	1803	1452	1541	1674	1238	1859	2073	2222
2510046G10Rik	20	16	19	25	28	26	10	14	23	26	16	27	22	25	26	19
2610001J05Rik	909	1098	1136	1722	1407	1082	1228	1057	1048	1312	802	1035	1447	1340	1154	1209
2610002M06Rik	629	594	744	1170	955	742	668	671	691	892	598	1070	1339	1215	1084	887
2610005L07Rik	725	285	637	1095	527	354	650	562	563	632	595	766	742	887	631	931
2610008E11Rik	289	223	274	520	370	255	347	276	227	402	364	251	268	279	251	501
2610017A05Rik	5	17	18	9	12	5	12	5	1	12	2	2	4	8	6	9
2610020C07Rik	28	28	23	94	64	13	27	31	19	44	49	37	17	42	28	34
2610021A01Rik	270	207	295	440	324	196	271	283	284	378	315	343	301	318	316	410
2610027K06Rik	5	11	3	15	7	11	9	11	2	5	11	13	13	9	9	11
2610028D06Rik	6	0	5	11	6	3	1	3	0	2	8	7	0	3	1	4
2610035D17Rik	161	233	174	283	240	116	212	178	84	190	202	128	74	157	100	250
2610035F20Rik	13	7	5	22	16	9	3	2	5	2	21	11	8	2	11	10
2610037D02Rik	32	9	28	48	29	16	22	29	18	36	47	25	6	54	31	46
2610044O15Rik8	166	150	156	323	163	148	212	116	159	234	133	233	193	184	128	198
2610203C22Rik	50	45	29	115	62	36	43	15	20	49	46	41	37	35	21	60
2610206C17Rik	0	2	3	4	1	2	3	0	3	0	0	0	5	1	2	4
2610301B20Rik	209	224	241	394	277	223	368	330	183	292	255	278	410	363	343	319
2610306M01Rik	121	148	137	226	197	138	106	98	137	245	122	171	213	185	123	177
2610307P16Rik	9	1	3	9	4	7	5	8	6	10	4	6	18	5	9	7
2610318N02Rik	225	184	155	369	168	140	182	193	194	233	131	197	203	175	157	227
2610507B11Rik	4932	3944	6359	9080	6681	4753	8055	6818	5102	4429	5791	7124	3658	7178	8186	7378
2610507I01Rik	37	15	42	52	54	30	39	44	26	33	28	54	49	32	23	57
2610528A11Rik	0	5	1	1	3	2	290	14	0	0	2	2	2	28	58	1
2700029L08Rik	0	9	4	2	1	1	1	2	2	1	5	3	0	1	0	1
2700033N17Rik	50	66	56	90	74	50	51	60	58	41	43	48	65	78	52	74
2700038G22Rik	25	66	60	162	52	74	119	95	44	94	79	47	28	67	43	71
2700046G09Rik	28	30	25	50	50	34	23	21	37	51	32	55	39	32	26	33
2700049A03Rik	389	319	503	887	570	367	498	382	376	338	505	601	247	422	556	579
2700054A10Rik	185	221	186	363	294	195	144	135	230	238	202	243	189	197	230	351
2700062C07Rik	169	167	191	279	219	186	227	203	160	237	146	195	246	187	164	180
2700081O15Rik	214	254	275	603	190	262	493	312	187	237	289	276	127	206	313	352
2700097O09Rik	147	156	173	327	202	183	205	161	156	320	185	177	271	207	180	224
2700099C18Rik	94	87	111	248	105	107	111	78	70	136	100	130	81	143	106	126
2810001G20Rik	68	173	124	181	151	86	131	91	97	215	88	115	182	179	104	148
2810002D19Rik	92	115	97	235	141	126	148	108	108	190	143	141	181	158	152	167
2810004N23Rik	949	1015	1071	1792	1178	964	1121	1094	1174	1323	948	1253	1617	1404	1274	1258
2810006K23Rik	259	275	333	397	379	242	351	336	242	406	286	282	384	378	315	341
2810013P06Rik	149	153	145	296	184	137	114	112	166	261	133	157	257	216	159	198
2810021J22Rik	193	177	252	404	230	165	300	287	236	237	206	248	234	204	217	318
2810025M15Rik	416	595	480	784	578	517	606	527	610	701	356	502	687	589	593	599
2810029C07Rik	68	71	72	123	127	46	112	56	76	135	91	73	106	120	62	77
2810032G03Rik	7	22	10	34	17	16	6	18	18	13	16	13	16	16	19	13
2810039B14Rik	26	35	35	54	31	22	26	23	48	23	21	39	19	31	30	59
2810402E24Rik	108	56	101	166	149	78	86	51	65	108	105	82	93	118	70	163
2810403D21Rik	19	17	26	31	33	20	16	7	11	23	16	25	19	21	11	27
2810405F17Rik	2	19	10	12	6	2	7	3	4	16	8	5	10	7	14	9
2810408A11Rik	9	11	12	8	15	12	5	6	11	6	2	5	7	2	2	13
2810408I11Rik	48	98	70	114	69	61	73	63	56	116	27	63	73	55	75	70
2810410L24Rik	61	78	34	114	66	51	47	39	76	54	56	54	34	29	19	69
2810414N06Rik	30	23	14	16	27	33	21	18	16	15	24	25	25	18	16	18
2810428J06Rik	1	0	2	6	1	4	0	2	0	1	3	1	0	5	0	1
2810429I04Rik	101	77	102	234	111	104	182	146	114	140	99	109	157	170	123	137
2810430I11Rik	3	2	0	1	1	1	3	0	0	1	3	0	0	0	0	1
2810454H06Rik	10	8	10	28	25	9	10	13	23	14	8	12	15	25	11	15
2810455O05Rik	13	25	17	33	24	11	27	11	21	19	14	14	14	11	12	35
2810457G06Rik	7	0	12	19	2	5	0	0	10	4	16	7	2	7	3	12
2900005J15Rik	19	15	22	41	34	12	3	6	3	13	20	10	2	12	6	15
2900009J06Rik	7	13	5	10	8	2	3	4	6	5	11	6	9	4	5	11
2900026A02Rik	71	55	76	90	51	28	118	55	46	39	46	54	8	55	87	73
2900041M22Rik	22	57	36	51	54	30	53	45	30	107	29	27	57	45	47	30
2900052L18Rik	94	75	90	122	195	50	64	50	59	82	127	51	38	86	45	180
2900060N12Rik	7	4	2	9	4	1	9	1	10	4	10	0	7	6	7	8
2900076A07Rik	50	67	53	107	42	40	22	24	16	46	24	49	48	53	42	64
2900089D17Rik	10	3	10	27	29	4	17	9	6	13	11	5	13	6	5	21
2900093K20Rik	15	16	22	26	23	15	30	11	10	40	11	34	29	23	10	16
2900097C17Rik	4789	4827	4541	7625	5938	4170	4171	3748	3935	3079	4131	5289	2221	4250	4548	6891
3000002C10Rik	40	25	40	58	38	39	74	29	32	31	20	54	28	36	38	48
3010001F23Rik	1	1	0	5	6	5	5	5	1	5	0	3	0	0	1	6
3010003L21Rik	38	36	38	45	52	33	44	29	54	48	31	26	45	42	58	58
3110001I22Rik	26	38	51	76	35	32	33	47	40	90	40	54	61	44	47	63
3110006O06Rik	4	1	5	3	1	0	4	0	5	0	3	0	0	0	2	4
3110009E18Rik	24	31	62	85	36	55	54	43	44	67	14	37	53	40	46	42
3110021N24Rik	2	1	6	14	4	5	13	1	6	4	6	1	2	6	4	11
3110040N11Rik	159	253	178	321	225	201	183	179	176	284	143	181	263	241	202	235
3110045C21Rik	14	7	17	21	12	21	21	15	6	23	13	13	43	20	23	34
3110053B16Rik	37	34	34	52	59	5	14	27	17	13	33	19	24	16	20	44
3110056K07Rik	43	81	49	136	58	48	72	56	42	106	80	76	58	57	69	74
3110062G12Rik	1	0	0	2	1	0	3	0	2	0	6	3	0	1	1	0
3110067C02Rik	6	1	0	0	0	0	4	0	0	2	1	4	0	1	2	6
3110070M22Rik	5	7	3	7	10	5	5	3	4	5	8	0	9	8	3	3
3110082I17Rik	365	491	432	703	461	359	474	438	369	488	329	423	653	573	483	460
3110083C13Rik	9	10	7	24	10	11	15	11	6	8	5	12	16	8	3	20
3110099E03Rik	1	2	1	2	1	4	1	0	0	11	2	2	1	3	1	2
3222401L13Rik	22	20	29	37	38	10	27	43	28	23	22	18	16	22	21	40
3300002I08Rik	7	7	11	30	5	9	12	18	10	12	12	22	22	15	12	29
3300005D01Rik	3	2	0	3	0	1	2	1	1	2	1	2	2	3	1	0
3425401B19Rik	3	2	2	5	5	2	10	5	1	1	0	1	0	2	17	0
3830406C13Rik	351	411	462	742	555	409	466	422	385	451	406	552	584	463	489	523
3830408C21Rik	6	9	9	32	11	12	4	6	3	5	4	14	6	13	11	8
3830432H09Rik	2	2	0	5	2	0	1	1	0	0	2	1	0	3	0	0
3930402G23Rik	10	8	1	8	5	4	2	1	2	3	7	8	7	10	3	11
4430402I18Rik	32	33	21	37	48	26	20	31	10	38	32	54	36	30	16	46
4631405J19Rik	12	12	2	10	6	1	4	3	1	10	17	1	0	3	0	29
4632404H12Rik	324	262	310	754	448	243	329	289	242	458	390	388	223	433	279	494
4632404M16Rik	2	1	0	1	0	0	2	1	2	0	7	2	0	1	0	0
4632411P08Rik	3	0	0	1	4	0	1	2	4	5	1	4	1	2	1	0
4632415L05Rik	375	230	402	621	432	358	401	402	363	465	363	418	451	451	427	514
4632427E13Rik	22	15	20	59	66	26	20	13	13	37	65	20	9	29	11	33
4632428C04Rik	2	2	0	3	2	4	10	4	0	1	0	0	3	2	2	2
4633401B06Rik	8	0	3	2	5	4	4	5	1	5	13	0	1	7	8	1
4731419I09Rik	1	1	4	13	5	3	4	0	0	2	3	2	1	0	1	4
4732416N19Rik	27	33	30	54	26	26	40	26	22	59	32	46	37	36	32	46
4732419C18Rik	22	19	29	69	16	51	36	18	39	33	37	47	50	46	17	42
4732440D04Rik	25	14	23	59	37	15	22	24	7	38	33	24	25	23	19	27
4732487G21Rik	6	14	7	24	34	19	28	11	4	10	18	27	3	15	17	16
4732490B19Rik	1	2	2	9	1	2	2	4	2	3	2	0	0	1	3	3
4732491K20Rik	66	51	46	111	71	57	64	75	36	80	65	109	53	68	59	65
4732496C06Rik	15	9	8	37	16	12	12	15	1	7	10	11	0	3	11	11
4833403J16Rik	0	0	0	5	4	4	2	5	0	3	3	0	0	3	0	2
4833412K13Rik	8	2	11	6	21	8	1	4	3	15	16	7	4	16	9	9
4833413G10Rik	18	27	28	71	25	19	31	13	18	23	39	20	8	18	22	33
4833415N18Rik	5	7	6	8	9	4	3	8	2	24	4	10	11	16	7	1
4833417C18Rik	1	6	1	1	3	2	1	2	1	3	5	7	4	8	1	6
4833418N02Rik	18	12	4	24	10	3	11	2	7	7	2	14	8	10	6	12
4833420G17Rik	601	670	488	1067	746	555	652	431	573	695	555	687	455	474	532	837
4833422C13Rik	4	8	8	13	7	0	6	20	14	11	4	24	9	0	0	5
4833439L19Rik	1847	1620	1897	2736	2299	1627	2053	1739	1992	1645	1595	1931	1508	1749	1904	2383
4833445I07Rik	7	11	5	5	17	4	4	2	5	5	5	9	3	4	6	18
4921504A21Rik	10	4	7	26	13	12	18	11	7	20	15	11	24	18	4	17
4921507P07Rik	24	13	29	86	49	49	41	47	42	73	43	65	67	42	59	37
4921514A10Rik	15	4	18	22	17	20	9	12	7	28	28	9	4	17	7	15
4921515L22Rik	10	5	6	9	6	4	2	7	8	5	14	7	2	5	2	16
4921523L03Rik	4	0	1	11	5	0	0	0	0	3	14	9	1	3	0	2
4921524J17Rik	351	470	276	651	356	347	455	344	449	370	306	327	377	412	374	446
4921531C22Rik	44	35	54	60	61	29	37	36	39	46	58	31	50	46	45	51
4921536K21Rik	94	54	121	141	111	110	111	129	101	140	63	126	97	109	122	102
4930402H24Rik	504	389	450	882	648	514	413	490	356	365	651	611	400	535	510	864
4930404I05Rik	1	4	9	15	12	19	2	1	2	10	9	6	1	8	3	17
4930404N11Rik	2	9	2	11	7	3	3	1	5	4	8	8	1	4	4	8
4930405A21Rik	0	5	3	3	4	3	1	4	1	5	5	6	7	7	4	10
4930412C18Rik	7	11	13	13	10	7	12	9	6	9	13	21	21	11	11	16
4930412F12Rik	3	2	3	3	14	2	0	0	5	7	1	9	3	3	3	15
4930412M03Rik	2	2	1	2	7	6	4	1	0	6	22	3	2	4	1	1
4930413G21Rik	1	1	0	1	3	0	1	0	1	1	0	1	1	0	0	2
4930422M22Rik	1	0	2	3	3	0	4	0	0	5	3	1	1	0	1	2
4930426I24Rik	0	0	3	3	1	0	0	3	5	0	2	3	4	1	2	0
4930426L09Rik	6	10	5	14	8	6	1	5	16	9	8	7	4	9	4	12
4930429F24Rik	22	12	15	34	22	17	22	22	7	8	13	22	20	17	15	12
4930430E12Rik	1	0	1	8	3	7	2	0	3	4	2	7	7	5	4	3
4930430F08Rik	212	236	257	442	378	219	291	285	251	293	213	290	369	326	281	317
4930431P19Rik	31	36	28	46	50	24	25	25	18	24	24	16	33	28	15	49
4930432K21Rik	141	155	142	313	296	224	156	176	236	222	195	224	265	253	169	169
4930435M08Rik	22	14	19	37	48	25	19	14	3	17	130	23	3	17	16	11
4930438A08Rik	8	3	3	12	1	0	42	5	8	7	1	17	32	9	25	10
4930447F24Rik	100	120	168	163	173	95	110	126	132	183	109	116	138	124	106	124
4930449C09Rik	0	4	2	6	2	0	3	3	0	2	0	6	0	1	3	2
4930451G09Rik	20	26	17	10	10	9	14	12	11	13	25	5	9	5	16	15
4930453N24Rik	592	639	654	1039	766	569	883	683	554	745	486	629	861	773	724	653
4930455C13Rik	1	0	6	3	2	1	2	1	1	3	0	0	0	0	3	0
4930455G09Rik	58	84	49	93	93	74	31	51	53	74	47	47	103	69	51	86
4930466K18Rik	6	11	3	15	6	9	5	9	4	8	12	9	4	9	3	14
4930470P17Rik	0	0	0	1	0	2	1	1	0	2	2	1	5	1	2	0
4930471E19Rik	1	0	1	5	4	1	5	5	1	3	3	7	5	7	7	4
4930474H06Rik	0	0	0	0	1	10	0	3	1	2	0	6	4	10	2	0
4930478K11Rik	5	3	4	8	8	2	0	0	2	1	6	6	3	0	5	6
4930481A15Rik	16	19	10	38	17	16	5	10	12	24	8	19	17	13	13	26
4930481B07Rik	10	10	4	19	19	2	6	10	9	30	8	12	8	12	12	10
4930486L24Rik	0	1	1	0	0	1	3	0	3	5	0	1	0	1	1	0
4930488L21Rik	1	0	1	2	1	3	2	1	0	0	6	1	2	2	0	0
4930500M09Rik	4	0	0	1	1	0	2	1	0	3	2	4	0	8	4	2
4930502E18Rik	11	9	13	7	20	4	6	12	9	32	10	11	19	15	8	16
4930503L19Rik	366	370	372	813	327	346	514	368	393	555	351	408	497	543	430	485
4930506C21Rik	0	5	5	3	3	1	1	0	0	4	1	1	2	3	0	0
4930507D05Rik	6	3	7	1	4	5	1	4	3	7	4	0	10	2	3	5
4930509E16Rik	25	20	27	40	29	26	33	33	20	22	23	12	22	27	24	35
4930509G22Rik	4	1	3	12	5	8	4	1	8	8	8	14	1	7	7	7
4930511M06Rik	2	5	2	1	2	1	1	3	0	7	1	8	0	2	2	4
4930512J16Rik	4	0	5	11	6	13	0	5	2	2	3	1	6	3	3	2
4930513N10Rik	62	23	58	73	74	29	28	46	55	31	58	74	37	43	60	72
4930515G01Rik	0	1	1	13	4	3	6	2	5	4	2	4	0	4	11	5
4930516B21Rik	6	3	10	32	8	5	13	18	10	12	15	12	0	8	7	5
4930517E14Rik	3	2	6	12	6	2	3	4	5	3	3	0	0	3	2	5
4930518I15Rik	9	2	6	13	10	3	8	4	2	11	6	11	8	5	4	10
4930520O04Rik	7	13	15	44	15	9	17	5	16	12	21	13	16	21	10	10
4930522L14Rik	21	26	20	47	50	23	31	28	10	45	24	26	50	51	28	38
4930523C07Rik	22	32	24	32	22	8	53	11	43	27	2	22	20	46	34	19
4930524O07Rik	2	4	9	13	6	10	5	2	0	9	5	3	5	12	0	6
4930526A20Rik	2	2	0	2	0	1	1	0	0	1	0	1	0	2	1	1
4930534D22Rik	1	0	1	9	0	0	5	4	2	7	5	5	1	5	0	0
4930537H20Rik	2	0	4	2	2	0	1	0	3	1	1	5	0	4	0	0
4930539E08Rik	15	17	25	29	13	21	31	12	28	46	22	34	26	14	27	31
4930539J05Rik	9	5	5	10	11	2	3	5	0	13	5	9	9	8	2	8
4930540M05Rik	3	0	2	5	1	0	3	1	0	5	1	2	3	5	6	0
4930547M16Rik	7	12	9	17	7	17	8	3	4	12	5	18	14	14	1	10
4930551O13Rik	2	0	0	1	0	1	1	1	0	1	4	4	3	4	3	2
4930555B11Rik	0	2	7	11	5	13	5	5	1	11	4	18	14	6	9	4
4930556H04Rik	4	7	6	8	14	10	1	4	18	7	5	9	4	6	5	16
4930556J24Rik	0	0	1	1	0	0	0	0	7	1	1	3	0	7	1	1
4930556M19Rik	18	23	21	71	58	33	19	20	32	43	29	49	59	51	40	49
4930558J18Rik	41	24	49	79	46	54	53	57	61	80	50	71	49	60	55	43
4930563E22Rik	22	23	15	26	18	15	21	12	28	23	20	18	14	28	17	17
4930565N06Rik	8	2	9	19	12	5	5	7	5	8	21	18	1	12	7	19
4930570G19Rik	1	1	0	2	1	1	2	1	0	1	0	1	1	0	0	0
4930577N17Rik	15	25	27	26	50	23	28	20	21	23	28	32	5	18	22	26
4930578M01Rik	3	4	5	1	3	1	5	6	0	5	3	9	8	5	3	4
4930579G24Rik	229	307	239	444	320	224	334	337	275	331	219	271	383	330	387	328
4930579K19Rik	9	11	15	14	25	6	9	5	10	16	6	18	5	9	4	9
4930581F22Rik	70	55	55	166	89	78	61	42	64	81	66	70	48	81	52	79
4930589O11Rik	3	0	6	0	4	1	0	4	0	0	2	3	2	1	2	4
4930590J08Rik	11	1	12	10	11	1	11	6	6	7	10	18	3	8	6	10
4930594M22Rik	28	11	19	25	23	16	31	27	8	17	21	19	18	30	30	34
4930597O21Rik	5	0	0	3	1	0	2	0	6	2	0	1	0	3	3	1
4930599N23Rik	1	2	2	2	2	0	1	2	3	0	0	10	0	11	1	4
4931406C07Rik	1207	1174	1535	2792	1909	1325	1628	1551	1323	1469	1292	2117	2245	1996	2134	1880
4931406P16Rik	2330	1330	2338	3677	2723	1824	2086	2344	2119	1916	2620	3554	1914	2790	2906	3244
4931413K12Rik	1	0	4	6	4	1	0	1	1	0	4	1	0	3	1	1
4931414P19Rik	109	96	122	216	173	96	186	127	114	149	116	140	147	162	146	151
4931415C17Rik	7	0	4	5	4	4	1	1	1	9	2	7	1	5	6	3
4931422A03Rik	2	0	3	5	3	0	2	1	3	0	4	5	2	3	5	0
4931428F04Rik	114	83	75	213	147	75	70	54	72	56	73	122	48	69	76	155
4931440P22Rik	39	30	36	76	53	25	30	28	28	36	32	41	26	40	33	32
4932415D10Rik	2	0	0	3	2	2	1	1	0	0	3	0	1	0	1	1
4932422M17Rik	61	27	46	147	41	33	42	32	23	37	57	52	14	71	33	67
4932438A13Rik	993	580	1057	1610	1186	657	1507	1127	770	844	1383	1141	315	1031	1125	1446
4932438H23Rik	29	14	14	21	13	15	40	6	22	12	23	27	25	19	36	42
4932441J04Rik	8	1	12	39	5	2	19	27	4	10	12	15	18	4	27	35
4932442E05Rik	7	0	8	6	0	6	5	4	1	2	7	2	2	4	6	6
4932443L11Rik	0	9	1	0	1	0	1	1	0	2	4	0	1	1	0	1
4932702P03Rik	4	0	1	2	6	2	0	1	0	2	0	3	0	2	1	3
4933402D24Rik	7	3	3	8	4	3	2	6	0	1	3	1	1	6	5	1
4933404O12Rik	142	126	166	269	221	142	113	129	161	149	138	143	115	163	144	165
4933405L10Rik	5	10	3	9	5	6	2	0	3	1	1	7	6	6	0	3
4933406C10Rik	3	4	1	3	5	0	1	3	4	1	0	0	3	3	1	1
4933406P04Rik	10	16	9	12	16	7	10	14	4	10	5	8	12	12	7	28
4933407K13Rik	60	41	54	164	56	39	74	66	37	61	76	75	36	55	43	81
4933407L21Rik	3	8	1	5	4	6	2	3	0	0	1	0	1	1	0	3
4933408J17Rik	0	3	0	3	3	0	4	1	0	1	1	1	1	0	0	2
4933411K16Rik	5	4	13	11	5	4	2	0	2	5	18	7	1	5	4	4
4933412E12Rik	1	11	9	21	29	19	15	14	12	13	7	58	83	53	72	12
4933415A04Rik	9	13	2	21	12	4	11	8	6	1	8	7	3	4	6	12
4933417C20Rik	2	6	4	8	4	5	7	2	5	12	0	3	2	5	3	3
4933417D19Rik	1	2	2	4	0	0	0	4	0	2	2	0	4	6	0	2
4933421A08Rik	2	5	8	7	6	0	0	0	0	4	1	2	0	3	0	6
4933421O10Rik	211	218	173	322	281	140	105	126	184	234	128	220	186	185	155	310
4933423P22Rik	2	12	4	10	15	23	14	9	4	3	32	9	5	8	5	16
4933424G06Rik	1	5	3	2	2	1	0	1	1	1	6	2	0	0	3	3
4933424M12Rik	1	0	3	8	1	1	2	2	0	2	1	1	2	2	4	0
4933427D14Rik	320	267	284	517	302	234	306	305	280	257	265	300	176	272	323	411
4933427G23Rik	5	0	0	2	0	3	6	0	4	0	0	0	2	1	2	1
4933430I17Rik	9	15	13	31	31	11	10	10	17	27	13	26	20	21	27	15
4933431C10Rik	6	1	10	15	15	3	15	12	1	14	13	18	0	23	4	6
4933431E20Rik	428	296	372	769	500	268	358	354	346	502	415	474	335	429	331	701
4933431K14Rik	20	17	14	23	15	6	12	16	20	24	12	14	16	18	9	20
4933432I09Rik	0	0	1	4	1	3	0	1	0	0	2	3	0	1	1	2
4933433G15Rik	0	1	0	0	3	0	5	0	0	2	1	3	2	6	0	2
4933433G19Rik	5	2	0	4	9	0	3	1	1	1	3	7	1	1	2	4
4933434E20Rik	1287	1799	1557	2517	1782	1454	2050	1543	1538	2437	1408	1887	2545	1981	1680	1823
4933437G19Rik	5	11	2	15	4	3	9	5	0	6	2	6	4	2	2	6
4933439C10Rik	95	118	92	240	125	95	68	85	81	101	101	101	66	107	80	154
4933440N22Rik	92	69	71	136	103	62	51	47	56	62	45	79	56	76	63	98
5031425E22Rik	240	274	231	492	443	155	155	151	168	245	263	229	211	233	167	397
5031434O11Rik	33	25	20	41	30	29	27	33	33	23	13	27	13	32	17	32
5031439G07Rik	8022	8989	13302	17605	12753	10876	15110	15278	8727	10884	13495	14903	10127	14549	16169	14372
5033403F01Rik	5	6	5	11	12	1	6	4	6	4	5	2	1	2	1	3
5033406O09Rik	144	167	141	179	245	134	145	142	102	227	120	125	231	187	152	179
5033417F24Rik	2	0	3	7	1	2	11	1	2	9	5	5	2	9	3	3
5033430I15Rik	20	45	32	51	27	60	55	30	36	46	26	35	50	33	45	28
5330406M23Rik	2	0	1	0	1	0	4	0	1	5	7	0	0	3	1	2
5330416C01Rik	0	3	9	1	1	2	1	1	0	0	2	4	2	0	0	5
5330417C22Rik	9	7	10	15	14	10	19	13	7	3	7	12	13	5	4	8
5330438D12Rik	30	32	14	48	20	21	18	15	15	23	15	18	14	35	13	38
5330439K02Rik	1	1	1	9	3	3	4	0	4	0	0	3	1	0	2	1
5430400D12Rik	1	2	1	1	2	0	2	2	6	0	5	2	1	1	3	1
5430402O13Rik	4	6	12	6	12	13	7	10	8	14	5	12	12	2	12	10
5430403G16Rik	16	6	5	10	14	5	12	7	11	16	9	16	12	14	7	8
5430405H02Rik	22	38	25	63	36	72	21	24	36	27	14	40	33	38	27	36
5430414B19Rik	6	6	4	2	8	4	4	3	18	2	7	2	9	5	5	3
5430416N02Rik	126	129	116	232	161	96	124	120	96	134	100	168	129	150	104	166
5430421F17Rik	1	0	0	4	0	1	0	2	0	1	0	0	2	1	2	4
5430427O19Rik	1	0	2	8	1	4	2	1	2	8	0	8	7	14	15	0
5430430B14Rik	5	1	1	6	7	5	5	3	3	3	2	13	2	3	5	6
5430430K15Rik	0	1	0	4	1	1	1	0	2	1	2	5	0	2	3	1
5430431A17Rik	1	18	5	8	9	1	1	2	0	6	11	5	0	4	5	13
5430440P10Rik	0	4	2	1	5	2	2	0	5	2	2	1	4	2	1	3
5530601H04Rik	183	222	208	407	234	197	246	171	206	345	189	259	246	320	194	257
5730403I07Rik	0	2	0	1	4	1	0	1	0	1	2	2	2	0	0	0
5730405O15Rik	4	1	5	5	13	9	4	0	1	10	4	3	0	7	2	14
5730409E04Rik	177	194	208	302	304	163	146	125	141	145	191	228	270	215	211	236
5730414N17Rik	9	6	10	7	15	11	1	1	12	1	4	9	10	1	6	21
5730455P16Rik	898	572	708	1331	958	558	562	623	642	800	701	940	832	844	756	1132
5730480H06Rik	204	208	193	370	278	201	205	179	220	259	198	259	375	273	216	251
5730507A11Rik	7	0	0	7	8	4	1	1	0	0	5	0	0	3	0	1
5730507C01Rik	87	108	161	193	114	104	119	143	110	146	114	153	183	157	131	184
5730521K06Rik	0	2	4	6	6	4	0	4	0	2	10	3	0	5	3	2
5730596B20Rik	14	4	26	51	11	13	13	20	12	13	33	21	0	13	9	27
5830408C22Rik	26	23	44	52	45	25	4	15	19	22	32	34	18	17	21	39
5830416I19Rik	3	1	2	6	0	1	3	1	0	5	0	0	0	1	3	0
5830417I10Rik	1211	797	1443	2270	1514	1098	1437	1441	1233	1077	1661	1590	642	1316	1546	1733
5830418P13Rik	1	0	3	3	4	0	1	0	2	1	4	0	0	1	4	5
5830432E09Rik	5	7	9	21	13	10	11	11	19	36	14	27	17	14	25	13
5830444B04Rik	19	24	13	25	37	20	16	10	13	27	5	66	60	33	39	32
5830448L01Rik	1	10	13	18	7	6	6	2	4	8	11	6	3	15	18	18
5830454E08Rik	2	7	5	14	9	8	5	6	4	5	4	1	6	7	1	11
5830462I19Rik	9	2	3	15	6	0	4	3	3	0	6	1	4	3	2	11
5830487J09Rik	0	0	2	8	2	2	2	0	0	3	0	3	0	4	1	4
5930403N24Rik	14	8	15	30	18	9	13	5	11	17	14	14	13	14	15	18
5930420M18Rik	21	31	39	50	47	17	22	22	19	23	44	41	10	34	14	41
5930430L01Rik	25	8	20	44	29	11	19	15	12	16	23	26	26	21	19	25
6030407O03Rik	3	5	4	10	5	0	1	2	5	4	9	4	2	4	6	4
6030442K20Rik	11	6	17	44	22	19	20	21	16	26	22	18	29	18	25	22
6030443J06Rik	20	9	19	31	16	7	16	14	5	30	17	13	18	24	13	26
6030445D17Rik	2	5	2	4	9	5	3	5	0	0	0	5	4	3	4	2
6030458C11Rik	889	809	1000	1469	1111	858	944	887	981	782	1014	999	796	1050	1017	1220
6230400D17Rik	22	13	18	37	10	22	21	13	10	13	23	28	36	26	17	18
6330403K07Rik	0	3	3	12	5	1	7	1	1	4	1	0	8	4	1	3
6330403L08Rik	62	45	73	52	145	48	29	32	53	23	71	59	33	51	47	88
6330408M09Rik	15	7	7	9	21	6	1	5	7	13	10	17	6	12	2	15
6330415G19Rik	9	9	13	26	25	14	11	17	8	23	11	14	5	16	9	15
6330418K02Rik	31	40	13	45	46	34	20	17	35	53	16	29	40	30	28	35
6330537M06Rik	10	16	9	16	13	9	13	8	8	4	11	5	8	11	22	12
6330549D23Rik	8	18	20	20	19	15	18	10	10	29	15	24	9	20	17	17
6330562C20Rik	26	30	34	74	58	26	20	20	19	58	17	56	43	50	22	41
6430511E19Rik	26	6	11	32	18	8	7	22	12	19	36	17	11	15	7	9
6430548M08Rik	557	432	535	826	548	445	482	492	553	440	655	673	349	506	788	742
6430550D23Rik	5	5	10	22	11	4	7	5	1	15	18	9	5	17	8	7
6430562O15Rik	4	21	3	12	8	8	10	13	2	13	15	18	0	21	10	11
6430571L13Rik	31	19	15	27	24	19	16	11	9	9	20	9	16	12	13	27
6430573P05Rik	9	11	4	2	3	6	0	2	3	6	1	3	6	1	7	11
6430590A07Rik	20	0	19	27	13	11	7	8	3	23	22	20	2	12	4	20
6530402F18Rik	152	182	190	283	329	159	222	203	137	160	208	312	135	292	283	284
6530409C15Rik	11	5	9	20	15	8	8	8	1	10	17	19	7	8	7	10
6530437J22Rik	2	2	4	1	1	1	2	3	0	4	1	1	8	8	3	1
6720427I07Rik	36	51	39	72	46	42	52	12	29	77	32	54	23	53	16	45
6720469O03Rik	1	3	10	10	7	1	1	6	0	2	6	3	9	6	8	4
6720483E21Rik	2	3	1	1	1	4	2	0	6	5	4	3	0	1	2	6
6720489N17Rik	61	54	99	102	82	53	90	55	67	149	79	74	131	107	66	68
6820402A03Rik	2	1	1	1	0	0	2	0	5	2	1	3	1	3	4	1
6820431F20Rik	1309	655	1074	1982	1048	761	1138	1012	1109	1003	987	1307	1105	1399	968	1441
8030453O22Rik	2	0	4	0	0	1	5	1	2	1	3	0	2	3	2	2
8030462N17Rik	293	135	272	489	306	187	289	271	240	256	254	353	420	375	411	451
8430406P12Rik	1	6	2	15	1	6	5	3	4	5	7	1	1	4	3	2
8430422M14Rik	9	13	7	27	16	17	7	6	5	11	16	13	4	11	7	16
8430429K09Rik	85	73	79	162	133	58	100	79	90	142	84	101	118	123	108	127
8430432A02Rik	16	1	0	6	5	6	3	3	7	0	4	8	1	3	6	4
9030025P20Rik	125	107	87	233	163	94	97	80	82	142	86	167	98	125	92	168
9030407P20Rik	55	43	36	103	80	26	35	33	59	43	55	35	56	37	49	80
9030612E09Rik	4	7	5	35	22	1	12	4	5	5	8	6	5	6	6	18
9030624G23Rik	2	3	1	1	0	0	1	2	0	3	3	5	1	1	1	3
9130002K18Rik	1	10	1	1	1	2	3	5	2	0	4	1	0	2	1	3
9130008F23Rik	41	39	66	85	79	38	57	44	38	89	33	58	65	97	61	61
9130019O22Rik	60	54	50	85	62	46	52	46	43	82	47	71	95	79	79	70
9130019P16Rik	1	0	3	5	0	1	0	0	0	11	1	1	1	1	2	1
9130023H24Rik	116	77	93	144	139	80	71	74	109	69	95	120	116	83	91	111
9130024F11Rik	4	1	9	7	3	3	6	10	8	2	7	3	3	4	9	7
9130208D14Rik	0	1	0	3	1	2	4	0	0	4	1	0	3	3	2	0
9130213A22Rik	4	9	2	5	8	6	5	1	5	16	5	6	5	6	6	9
9130221H12Rik	126	120	88	230	163	126	120	112	117	63	91	90	45	80	123	172
9130230N09Rik	0	8	3	6	4	6	2	2	1	4	4	10	2	8	4	3
9130401M01Rik	490	680	578	913	682	492	866	584	564	762	440	554	909	830	716	674
9130604C24Rik	6	9	8	16	18	3	5	15	7	11	2	15	15	9	11	3
9230105E05Rik	0	0	2	1	3	2	2	11	0	0	7	0	2	1	0	3
9230111E07Rik	6	13	5	16	10	7	3	3	5	6	1	6	2	4	2	7
9230112E08Rik	90	65	87	155	117	71	105	77	64	45	116	83	42	88	69	160
9230114K14Rik	10	12	22	28	20	18	24	19	10	24	9	20	34	29	24	29
9230116L04Rik	1	1	4	16	11	1	1	3	1	6	3	7	9	4	3	5
9230116N13Rik	3	8	3	13	6	3	7	6	5	8	4	13	8	12	6	3
9330020H09Rik	27	33	24	27	32	18	21	16	30	35	20	15	17	29	16	21
9330102E08Rik	167	153	133	297	224	102	91	104	130	139	237	264	77	185	106	221
9330104G04Rik	20	46	17	41	69	13	20	10	31	39	21	24	27	28	21	36
9330111N05Rik	0	6	4	3	10	3	0	0	1	1	2	2	3	0	8	5
9330136K24Rik	0	0	3	0	5	1	0	1	0	3	7	0	0	3	1	2
9330151L19Rik	140	143	117	268	210	134	97	94	80	139	161	162	98	172	102	207
9330159F19Rik	19	29	42	83	51	39	47	46	37	42	41	32	24	42	70	49
9330159M07Rik	17	12	11	48	13	7	6	6	6	15	10	11	23	11	8	27
9330160F10Rik	8	12	4	15	29	13	14	4	5	15	25	20	16	16	10	19
9330161L09Rik	4	3	5	8	8	0	7	2	0	0	3	3	0	2	1	8
9330162012Rik	0	2	2	11	8	1	6	4	2	6	0	9	7	10	10	5
9330162G02Rik	44	20	50	60	49	38	36	25	31	45	77	28	36	44	26	40
9330171B17Rik	1	0	1	2	2	1	0	0	0	4	6	0	0	2	1	0
9330175E14Rik	12	15	53	38	117	49	14	19	2	16	6	177	151	237	209	8
9330179D12Rik	1	0	6	9	4	0	3	2	3	4	0	7	0	6	1	1
9330182L06Rik	167	110	155	256	148	112	195	182	149	110	123	187	138	165	182	217
9330188P03Rik	525	465	415	987	596	534	404	301	466	655	443	591	514	494	434	597
9430002A10Rik	3	2	2	4	0	3	10	2	0	3	4	1	4	3	0	1
9430015G10Rik	311	314	433	670	429	298	519	338	304	521	402	374	414	467	404	481
9430031K09Rik	1	1	0	2	3	1	5	3	0	0	3	2	0	1	1	0
9430034N14Rik	4	2	5	15	5	5	6	4	3	13	16	11	4	9	4	9
9430037G07Rik	2	0	5	6	7	0	1	3	2	3	7	3	1	3	10	4
9430037O13Rik	3	5	2	0	4	1	6	1	0	3	1	1	0	1	1	1
9430038I01Rik	128	186	115	204	154	114	148	104	97	166	97	99	246	183	127	151
9430053O09Rik	3	3	1	9	2	0	1	0	0	9	1	8	1	10	5	1
9430060I03Rik	0	7	2	0	1	4	2	1	8	3	0	0	2	2	3	12
9430064I24Rik	11	15	10	45	22	6	8	3	17	15	16	8	12	27	14	9
9430065F17Rik	8	5	3	13	4	4	1	5	5	2	5	3	11	10	3	7
9430081H08Rik	13	25	17	15	33	27	14	11	7	25	15	15	25	28	19	19
9430091E24Rik	7	13	1	19	9	13	12	12	17	20	8	8	18	8	5	11
9430092D12Rik	2	3	2	3	2	5	4	3	2	4	1	9	8	10	4	4
9530018F02Rik	4	2	9	8	10	2	3	5	1	4	3	10	15	9	8	4
9530026P05Rik	9	6	11	14	11	10	14	10	16	24	23	22	15	10	7	13
9530052C20Rik	6	0	0	6	3	6	2	3	0	2	7	2	13	3	2	6
9530053A07Rik	0	0	7	2	9	2	4	4	1	0	1	7	6	5	7	3
9530056K15Rik	9	15	12	11	6	5	7	4	8	11	11	7	5	4	10	6
9530059O14Rik	49	14	27	65	24	46	30	12	37	35	92	24	10	18	42	89
9530062K07Rik	0	12	2	0	0	3	2	2	3	3	0	4	4	3	0	0
9530068E07Rik	4247	4248	4427	6846	4965	3572	5610	4548	4285	5671	3978	4384	6218	5166	4414	5846
9530077C05Rik	8	17	11	23	21	27	20	11	22	23	15	15	15	10	18	11
9530080O11Rik	2	0	0	2	0	1	2	1	2	0	0	1	1	1	2	7
9530082P21Rik	16	16	45	58	91	42	10	17	6	22	19	80	51	104	117	26
9530085L11Rik	10	10	13	7	7	5	2	0	6	7	6	6	1	7	3	15
9530085P06Rik	3	1	3	1	2	0	5	3	0	0	1	3	0	2	0	0
9630001P10Rik	13	6	5	23	10	5	3	5	4	4	13	5	3	6	4	15
9630013A20Rik	2	4	3	6	10	3	3	4	1	2	3	3	2	4	1	1
9630013D21Rik	22	20	17	52	26	30	18	7	26	26	16	18	23	26	32	54
9630050E16Rik	2	1	8	5	6	7	3	3	3	9	15	0	0	3	2	9
9830144P21Rik	8	3	13	42	14	8	6	8	9	3	4	11	5	12	12	7
9930012K11Rik	96	102	114	172	156	86	134	136	106	131	57	113	183	143	123	128
9930014A18Rik	227	160	226	362	310	189	223	210	257	187	171	292	230	272	219	316
9930017N22Rik	20	11	6	28	14	25	6	11	8	20	35	19	1	20	6	32
9930021J03Rik	588	281	571	826	549	344	467	563	415	385	593	566	255	458	517	954
9930022D16Rik	1	0	2	3	2	0	0	0	0	0	0	1	3	4	5	1
9930104L06Rik	201	227	226	397	275	201	256	193	157	194	202	245	202	262	360	269
9930111J21Rik1	6	0	5	20	27	8	10	28	3	16	2	51	61	55	110	9
9930111J21Rik2	14	9	58	82	76	33	37	48	14	58	7	193	163	218	209	43
9930120I10Rik	0	3	2	3	6	1	5	0	2	1	2	0	0	1	0	13
A030001D20Rik	31	23	17	34	38	25	19	20	20	43	34	44	22	30	30	39
A030005L19Rik	1	2	0	9	0	1	2	1	0	4	1	0	7	5	0	3
A030012G06Rik	1	3	5	2	1	0	0	0	0	0	0	1	0	1	1	3
A130010J15Rik	219	198	268	447	274	167	221	214	210	298	211	256	332	264	274	387
A130012E19Rik	3	2	0	2	4	3	0	1	9	3	6	0	0	3	0	0
A130014A01Rik	16	27	23	53	40	24	32	17	15	32	20	22	21	29	16	35
A130023I24Rik	4	3	1	8	3	1	0	1	2	0	10	0	2	2	2	4
A130051J06Rik	21	16	22	55	43	39	23	18	39	32	30	37	34	35	32	40
A130077B15Rik	0	3	0	1	3	3	1	2	0	2	0	0	7	6	3	1
A230001M10Rik	14	5	8	21	0	5	7	10	21	10	8	3	2	7	4	8
A230005M16Rik	3	2	0	14	1	0	2	1	8	3	1	4	10	4	6	0
A230009B12Rik	0	1	4	4	0	0	1	1	2	3	3	2	0	3	1	5
A230020J21Rik	35	38	37	57	33	12	14	34	13	25	41	23	74	67	73	58
A230056P14Rik	13	13	28	50	39	43	28	17	35	34	39	47	48	48	43	37
A230060F14Rik	17	18	17	35	27	6	16	25	21	9	14	21	24	14	16	13
A230065N10Rik	6	6	11	18	7	10	5	1	1	11	4	16	40	22	11	15
A230072C01Rik	7	21	13	21	10	17	15	14	10	15	13	12	19	25	11	19
A230072E10Rik	1	3	6	0	5	0	1	0	4	2	5	3	2	2	0	3
A230087F16Rik	2	12	9	11	7	0	0	10	7	8	6	3	0	4	0	2
A230103J11Rik	10	9	20	23	7	3	8	14	2	5	21	2	6	12	5	15
A230107N01Rik	8	12	15	14	8	6	4	4	0	15	5	6	7	11	4	10
A2m	1	1	0	1	1	0	3	0	0	1	1	4	1	5	8	3
A2ml1	1	1	0	9	4	5	7	0	3	2	3	1	2	1	2	3
A330009N23Rik	4	8	6	14	16	18	17	13	10	31	7	19	19	16	15	11
A330023F24Rik	5	0	3	4	12	3	2	4	1	0	6	4	4	3	4	16
A330035P11Rik	16	16	9	26	15	12	12	15	18	15	11	7	17	20	10	26
A330049N07Rik	2	2	5	1	4	1	1	1	0	1	5	6	4	5	1	2
A330074K22Rik	0	1	1	3	5	0	0	1	0	1	0	0	1	3	3	3
A330076C08Rik	1	2	0	2	2	0	0	0	5	0	2	1	1	3	0	0
A330084C13Rik	2	0	0	1	4	2	2	0	0	0	5	1	0	1	1	1
A430005L14Rik	315	466	473	611	424	429	411	428	365	753	262	420	792	664	448	373
A430018G15Rik	5	21	6	17	14	7	6	3	7	17	6	7	15	5	4	19
A430027C01Rik	0	2	1	2	2	0	1	3	0	3	3	7	3	1	1	11
A430033K04Rik	150	102	104	189	154	93	152	165	127	117	153	149	88	122	123	214
A430035B10Rik	2	4	6	14	17	2	6	3	8	2	4	15	10	8	2	1
A430057M04Rik	18	18	40	81	51	22	60	32	22	44	38	43	32	55	36	44
A430078I02Rik	5	4	4	2	6	1	3	2	1	2	3	8	9	7	2	2
A430088P11Rik	2	5	6	8	1	5	2	7	0	1	2	7	3	5	6	12
A430103D13Rik	15	28	15	28	24	18	16	11	2	12	13	10	11	12	3	18
A430105J06Rik	7	6	5	16	11	9	6	3	2	3	9	4	3	7	4	7
A430108G06Rik	5	5	5	17	18	11	14	9	12	13	9	6	13	16	10	13
A430110C17Rik	0	4	5	2	7	4	1	2	0	2	13	0	0	2	4	0
A430110L20Rik	2	3	5	28	3	3	3	5	10	7	10	12	3	17	12	19
A4galt	5	6	15	14	20	13	31	3	9	6	0	12	9	19	14	7
A530016L24Rik	32	35	21	58	66	17	29	28	28	36	51	38	21	25	29	59
A530017D24Rik	138	122	104	175	135	133	71	83	85	89	95	134	65	96	69	142
A530020G20Rik	4	0	0	14	1	3	3	4	5	6	0	2	1	2	3	3
A530032D15Rik	0	4	1	2	2	1	1	0	0	0	0	3	6	2	4	1
A530040E14Rik	0	1	6	2	10	8	0	1	0	11	0	12	64	31	41	0
A530041M06Rik	1	2	1	4	0	1	0	2	0	1	3	2	2	0	1	2
A530064D06Rik	4	3	1	4	7	7	11	1	0	6	1	7	4	8	8	0
A530064N14Rik	9	6	7	6	9	6	8	9	7	12	20	5	3	5	6	13
A530072M11Rik	0	0	4	2	1	0	3	0	2	3	3	1	5	1	4	2
A630001G21Rik	123	129	132	237	226	158	142	126	120	199	139	161	162	156	138	228
A630001O12Rik	0	1	0	1	1	3	1	0	0	4	1	0	1	1	0	1
A630014C17Rik	2	8	0	2	1	0	5	2	3	1	0	7	3	7	3	1
A630052C17Rik	22	45	47	86	47	40	55	41	26	74	51	43	63	53	57	94
A630072M18Rik	65	103	84	139	85	76	67	84	109	30	76	65	79	131	110	125
A630076J17Rik	0	0	1	0	2	4	0	1	0	5	5	0	2	0	1	1
A630089N07Rik	68	60	91	126	47	53	68	101	48	160	87	110	118	91	88	87
A730011C13Rik	10	17	15	39	39	22	12	10	6	21	12	41	41	51	27	15
A730017L22Rik	58	33	54	164	80	61	57	64	60	77	60	109	47	94	80	111
A730061H03Rik	5	0	1	0	0	1	2	0	0	3	3	2	0	0	0	2
A730063M14Rik	6	4	7	17	10	5	9	6	3	8	5	11	2	13	5	2
A730071L15Rik	1	7	4	6	1	0	3	0	1	3	1	2	0	2	4	1
A730085K08Rik	6	0	3	5	3	2	23	2	11	4	0	2	4	8	6	3
A730089K16Rik	4	0	0	15	4	0	8	4	3	3	0	0	10	6	0	0
A730090N16Rik	2	5	0	0	3	5	1	0	3	1	1	0	3	3	4	3
A730091E23Rik	4	1	19	13	7	7	2	4	3	9	1	12	3	8	7	3
A830005F24Rik	1	2	0	0	4	0	4	0	4	6	0	1	3	4	1	0
A830019P07Rik	315	287	337	793	396	427	329	356	410	648	324	464	649	562	334	466
A830035O19Rik	13	1	6	15	7	2	1	1	3	4	14	18	7	7	12	12
A830052D11Rik	0	5	1	13	7	1	0	2	6	4	5	2	2	3	3	3
A830073O21Rik	9	6	11	10	17	5	8	12	17	15	15	15	12	13	28	18
A830082K12Rik	107	143	120	209	131	132	124	93	149	132	75	147	154	168	153	144
A830082N09Rik	18	21	26	45	27	19	18	22	15	20	36	18	11	21	23	28
A930001C03Rik	7	9	4	15	26	11	9	4	10	13	15	16	8	20	5	22
A930001M01Rik	0	0	7	1	0	0	1	2	0	0	3	1	0	1	1	3
A930002H24Rik	5	6	5	2	11	2	2	1	1	3	5	2	5	5	0	0
A930003O13Rik	9	2	0	2	6	0	4	4	2	1	1	8	4	3	5	7
A930004D18Rik	186	241	268	414	355	189	251	210	204	248	204	227	185	215	245	283
A930004J17Rik	27	14	42	116	33	35	33	18	10	61	115	75	21	41	36	62
A930005H10Rik	43	64	41	90	56	47	65	47	44	59	33	53	68	57	53	52
A930006L05Rik	0	3	1	1	1	1	1	3	3	0	5	0	3	0	3	2
A930007I19Rik	7	18	10	29	17	6	17	7	2	11	13	11	18	16	12	12
A930012O16Rik	9	5	8	9	20	18	3	7	7	9	3	16	4	5	9	9
A930015D03Rik	12	0	1	6	24	6	9	10	4	3	0	1	6	17	6	9
A930016O22Rik	3	0	2	12	1	1	6	2	0	2	6	1	1	1	0	2
A930024E05Rik	49	48	38	93	69	44	30	31	29	67	46	32	53	74	54	70
A930029G22Rik	2	3	4	7	14	3	6	11	4	9	11	4	5	2	6	23
A930030B08Rik	1	4	0	3	2	0	1	2	0	1	3	4	0	0	1	1
A930033H14Rik	33	11	28	41	52	13	14	16	23	18	35	34	5	32	10	47
A930035D04Rik	10	7	7	6	9	4	3	6	13	2	5	8	7	2	17	12
A930037H05Rik	29	25	7	37	42	23	24	17	20	39	43	30	11	27	14	40
AA386476	11	0	7	13	9	1	4	2	0	1	9	4	1	2	5	15
AA413626	2	0	0	9	3	4	4	2	0	1	0	4	0	2	6	0
AA414768	0	4	1	3	2	3	5	1	1	6	0	9	2	3	3	0
AA465934	10	11	15	25	11	5	11	14	3	27	1	14	23	10	6	9
AA467197	21	44	35	46	60	36	49	33	9	22	11	58	93	45	65	25
AA474408	6	18	8	20	9	15	15	12	11	5	17	10	6	10	10	6
AA914427	7	4	4	14	13	4	4	6	8	7	1	0	3	17	7	6
AA986860	17	6	19	31	20	12	104	12	1	7	12	30	14	25	26	12
Aaas	989	1045	1256	1934	1621	999	1350	1175	1123	1135	1046	1087	1032	1176	1200	1461
Aacs	1548	1950	1647	2336	1565	1644	1668	1676	1421	1150	1579	1779	1426	1612	2391	2679
Aagab	688	856	820	1237	893	812	830	865	762	912	673	876	1294	1072	1013	1104
Aak1	2031	1368	2695	3735	2581	1833	2648	2693	1775	1695	2948	3019	1151	2914	3035	3549
Aamdc	96	135	92	149	148	76	97	88	100	128	84	99	131	106	104	109
Aamp	2543	4028	2771	4707	4426	2880	2771	2625	2925	2802	2517	3142	3503	3058	3326	3716
Aar2	783	1035	984	1789	1206	1010	1092	1100	944	1241	818	1355	1593	1336	1388	1277
Aars	8736	7156	6306	12366	8182	7309	6265	6057	9426	5827	5415	8874	6698	6881	8168	10164
Aars2	301	400	414	666	408	286	523	376	308	309	313	380	229	348	429	453
Aarsd1	833	1171	876	1528	1012	991	1104	882	1030	944	670	1010	1173	1029	1167	969
Aasdh	176	183	185	409	242	215	162	156	173	253	224	244	199	244	228	246
Aasdhppt	580	677	544	884	685	575	644	586	598	702	467	610	972	808	710	686
Aass	65	64	53	69	43	32	52	39	56	56	63	47	77	45	55	81
Aatf	941	972	1125	1512	1188	977	1179	1076	917	860	882	1058	968	1133	1194	1048
Aatk	119	89	99	234	191	78	63	78	95	87	162	105	46	107	71	112
AB124611	8	14	15	36	40	28	34	36	9	38	10	58	100	79	105	14
Abat	505	327	319	749	423	417	301	436	414	392	524	559	419	307	470	812
Abca1	221	202	265	477	462	270	668	443	185	274	297	458	253	434	645	430
Abca12	699	363	734	1453	415	783	1721	878	942	463	509	540	297	593	973	789
Abca13	4	1	1	11	1	3	4	3	3	0	0	1	1	0	1	1
Abca2	1632	1116	1411	2687	1868	1083	1444	1319	1366	969	1969	1770	517	1388	1683	2489
Abca3	990	698	883	1445	1189	657	1135	915	842	601	976	1162	397	838	935	1453
Abca4	40	36	75	91	66	87	67	33	58	56	48	70	82	83	108	36
Abca5	249	163	185	400	257	177	355	238	167	183	240	265	178	251	302	315
Abca6	3	6	3	16	4	11	8	1	14	5	9	4	4	3	8	12
Abca7	683	572	728	1063	1011	468	659	568	540	423	716	770	311	680	842	1032
Abca8a	102	61	47	156	66	71	83	46	184	114	83	85	20	48	70	127
Abca8b	90	65	45	138	108	71	64	57	78	66	60	123	67	119	110	100
Abca9	2	1	5	22	26	16	54	16	10	24	4	6	4	19	83	13
Abcb10	370	366	514	725	552	376	655	483	349	512	453	497	588	592	613	622
Abcb1a	3	16	15	10	21	11	37	14	2	9	7	21	9	24	13	12
Abcb1b	229	196	354	482	329	266	514	382	271	331	236	381	403	475	408	303
Abcb4	10	10	12	5	6	5	1	10	1	25	11	6	5	7	11	19
Abcb6	846	854	940	1223	1036	690	1254	886	962	1020	736	856	1139	870	952	975
Abcb7	2114	1851	2323	3792	2828	1819	2623	2366	2245	2159	2172	2742	2303	2621	2549	3129
Abcb8	1386	1507	1550	2527	1449	1266	1939	1559	1441	1257	1180	1522	1159	1467	1681	1941
Abcb9	103	131	143	180	113	76	249	143	132	141	96	60	27	75	83	158
Abcc1	1605	942	1425	2445	1813	988	1399	1229	1504	1117	1493	1588	665	1392	1486	2064
Abcc10	326	293	332	692	514	290	307	255	314	318	470	414	149	353	357	510
Abcc2	11	1	7	21	10	32	4	3	24	10	15	6	20	21	19	19
Abcc3	10	20	14	27	34	26	46	45	16	18	6	49	43	50	56	24
Abcc4	649	436	621	1108	827	524	988	680	609	525	714	743	417	664	860	777
Abcc5	969	777	1049	1936	1150	982	1343	1066	814	1061	1203	1271	928	1334	1364	1456
Abcc9	188	141	138	197	123	103	129	120	144	123	151	94	21	71	57	341
Abcd1	215	210	195	387	435	235	212	215	185	195	237	375	242	271	400	312
Abcd2	7	5	10	12	14	9	15	13	2	12	1	10	16	24	29	11
Abcd3	2128	1946	2222	3934	2879	2163	2499	2111	2212	2149	2228	2554	2432	2453	2630	2938
Abcd4	268	246	237	513	356	225	299	223	249	238	283	345	199	250	258	338
Abce1	3559	2942	4032	5566	4004	3195	4893	4508	3840	3511	3692	4034	4313	4558	4088	4666
Abcf1	3011	3188	4061	5966	4510	3210	4405	4056	3449	3179	3428	4136	2861	4012	4351	4221
Abcf2	2374	2484	2791	3961	2954	2164	3297	2762	2484	2536	2288	2524	2963	2905	3057	3188
Abcf3	809	920	926	1266	1207	744	1001	934	787	918	846	1040	1267	1073	1075	1136
Abcg1	50	83	85	129	131	102	152	102	55	117	30	182	110	204	274	117
Abcg2	355	383	342	445	520	328	422	330	412	376	309	383	464	494	368	462
Abcg3	2	13	5	29	21	18	24	30	5	35	2	22	62	42	67	10
Abcg4	11	15	10	48	16	12	23	12	5	12	24	24	8	5	23	23
Abcg8	5	4	12	3	3	17	9	2	12	1	5	3	3	1	4	14
Abhd1	32	23	20	37	23	17	23	16	18	19	28	20	10	6	17	20
Abhd10	422	425	440	765	572	425	420	389	538	527	365	494	612	501	479	550
Abhd11	175	248	259	302	383	205	319	233	207	264	177	219	304	330	237	267
Abhd12	1537	1713	1551	2650	2028	1701	1931	1681	1809	2065	1666	2242	2792	2238	2176	2099
Abhd13	1014	838	977	1614	1016	930	1163	970	1049	951	946	1143	1302	1106	1069	1346
Abhd14a	199	288	295	437	328	253	319	253	329	336	232	275	339	349	270	339
Abhd14b	117	99	115	188	197	92	113	94	80	134	90	122	109	135	116	181
Abhd15	21	12	13	31	30	14	45	32	8	22	17	17	14	17	18	28
Abhd16a	750	1060	1007	1516	1204	797	908	772	873	1118	669	1262	1851	1478	1406	1015
Abhd17a	1064	1686	1255	1733	1550	1068	1305	1066	1199	1575	1030	1221	1728	1418	1476	1616
Abhd17b	356	405	291	595	380	304	377	346	348	387	236	408	465	378	445	426
Abhd17c	621	888	716	1118	746	696	1004	819	799	627	617	673	614	799	883	989
Abhd18	707	491	754	1209	777	512	354	521	666	808	817	823	822	692	592	951
Abhd2	1051	800	1152	1792	1440	686	1376	1009	764	788	1144	1457	760	1226	1391	1628
Abhd3	12	4	25	32	11	9	31	6	9	35	13	28	38	21	30	20
Abhd4	945	1006	913	1741	1470	820	988	920	1052	1146	863	1158	1146	990	1237	1496
Abhd5	705	797	841	1221	1039	688	1156	910	763	987	751	990	1540	1321	1048	993
Abhd6	186	214	202	378	282	195	267	230	192	305	188	231	320	285	306	269
Abhd8	1010	1510	1484	1917	1671	1120	1698	1471	1315	1260	1040	1179	1163	1231	1425	1687
Abi1	1726	1587	1737	2887	2369	1486	1840	1810	1831	1912	1590	2030	2297	1961	2079	2301
Abi2	1617	1498	1785	2611	1879	1409	1744	1639	1790	1481	1628	1730	1474	1730	1874	2425
Abi3	98	131	101	211	180	123	175	101	145	154	97	182	112	170	196	150
Abi3bp	6	9	5	20	13	3	74	9	4	7	1	2	5	8	25	2
Abitram	629	470	703	1109	661	503	824	689	616	634	496	762	499	688	715	833
Abl1	2617	2045	2894	4451	3120	1937	2958	2816	2432	2089	2877	3188	1348	2879	3011	3763
Abl2	1161	871	1345	2201	1298	1033	1520	1255	1201	875	1274	1453	700	1426	1483	1954
Ablim1	1280	863	1742	2774	2680	1131	2136	1584	1043	1438	1813	2622	947	2293	2486	1860
Ablim2	3	1	0	5	4	2	4	5	3	11	2	2	0	1	3	0
Ablim3	7	7	7	18	13	5	21	16	7	2	15	10	13	7	11	10
Abr	1060	731	1221	2023	1740	1199	1145	1127	1053	926	1181	1683	1033	1541	1603	1610
Abra	0	4	0	0	4	0	5	4	0	9	1	0	5	0	11	2
Abracl	801	1287	1084	1702	1346	1175	1120	884	1014	1163	840	1056	1467	1373	1096	1192
Abraxas1	242	227	248	378	310	237	258	242	228	319	195	297	332	379	267	329
Abraxas2	498	538	559	1014	657	487	661	521	563	609	547	624	630	685	660	763
Abt1	280	314	293	392	359	262	300	242	191	269	202	271	413	299	291	302
Abtb1	497	522	367	878	728	397	369	293	507	544	464	498	595	469	439	647
Abtb2	708	689	680	1127	848	660	628	722	638	476	705	782	364	651	808	1258
Acaa1a	1004	1291	988	1813	1320	1123	1155	921	1156	1254	897	1202	1618	1348	1419	1413
Acaa1b	0	1	3	2	5	0	3	1	2	32	0	1	3	0	3	3
Acaa2	384	491	415	753	593	471	501	393	435	532	305	409	587	503	493	562
Acaca	1849	1282	2064	3112	1704	1578	2435	2237	1518	1274	2189	2524	1094	2071	2514	2839
Acacb	245	175	262	412	356	190	300	232	177	158	359	417	172	358	368	332
Acad10	306	242	269	438	370	221	204	159	258	231	232	303	257	266	306	480
Acad11	579	469	532	914	883	476	490	522	538	566	589	670	493	512	642	837
Acad12	65	81	79	139	229	76	61	56	57	76	123	105	116	123	118	117
Acad8	449	552	494	856	660	419	551	430	467	622	443	523	772	598	554	749
Acad9	842	873	934	1489	1115	827	1278	1063	964	1024	877	965	1084	1142	1082	1069
Acadl	2379	2552	2278	4168	3552	2237	2162	2276	2488	2866	1893	3116	4659	3200	2991	3086
Acadm	512	689	618	1133	927	615	840	750	584	730	645	682	980	838	872	831
Acads	1007	1310	1114	1907	1398	957	1251	1092	1291	1505	1115	1255	1834	1381	1308	1485
Acadsb	1035	844	814	1479	1191	776	853	811	872	939	982	1082	1380	1037	1022	1392
Acadvl	910	1197	994	1420	1396	855	1015	872	873	934	940	1004	1179	1118	1199	1257
Acap1	3	8	4	9	9	10	18	9	1	6	0	15	29	13	26	10
Acap2	1545	1110	1385	2501	1690	1104	1470	1447	1382	1243	1486	1740	961	1559	1774	2308
Acap3	312	312	382	526	440	241	442	316	311	257	358	297	219	335	442	460
Acat1	3797	4266	4327	6508	4208	3741	4378	4486	4198	5604	3609	4222	6423	5145	4438	5437
Acat2	1857	2005	2373	3273	1970	1847	3092	2627	1804	2310	2004	2078	2894	2338	2953	3248
Acat3	6	10	2	6	6	2	6	5	2	11	6	4	2	0	1	4
Acbd3	1740	1333	1836	2503	1957	1397	1655	1528	1540	1276	1620	1918	1234	1765	1836	2221
Acbd4	177	206	166	236	217	143	141	142	213	255	165	178	223	223	221	246
Acbd5	460	415	494	875	635	492	593	527	400	479	592	616	528	551	577	789
Acbd6	1243	1510	1161	1934	1709	1278	1230	1118	1428	1134	1036	1407	1278	1213	1449	1606
Accs	169	151	127	298	262	155	119	125	180	151	189	227	200	160	112	221
Acd	479	602	543	769	605	521	579	468	611	565	407	510	474	569	612	668
Ace	38	45	43	142	140	95	215	75	45	23	37	51	19	92	91	33
Acer2	240	255	338	522	327	346	478	379	331	381	321	346	286	379	461	316
Acer3	214	203	197	467	272	266	328	291	265	360	174	323	501	412	353	341
Ache	173	113	91	242	167	72	45	55	65	95	234	85	20	54	48	203
Acin1	2567	2749	3377	5413	3767	2747	3396	3036	2538	2274	3154	3179	1782	2917	3360	3821
Ackr1	0	0	1	3	9	5	6	0	1	3	0	0	1	7	8	0
Ackr2	6	3	7	8	8	3	10	2	4	2	6	3	1	10	4	8
Ackr3	68	96	68	118	133	71	122	59	89	46	28	60	61	54	43	92
Ackr4	6	2	1	8	9	2	14	8	1	4	5	6	12	3	26	8
Acly	10696	8281	10168	15758	10781	7401	8298	9527	9047	7552	10337	10311	6663	8581	11680	16130
Aco1	971	892	927	1622	1275	951	991	1081	994	790	1004	1125	868	1010	1193	1538
Aco2	10017	8618	9970	15422	11142	8277	11518	11173	9490	9589	9275	10659	11024	10866	10776	13736
Acod1	1	17	21	19	58	30	157	8	0	18	1	89	110	80	74	5
Acot1	540	469	447	701	784	397	509	336	448	426	307	438	462	499	564	591
Acot11	39	7	19	64	50	26	55	25	33	23	31	38	15	38	31	38
Acot13	435	648	642	1030	634	624	824	720	530	1025	473	728	1087	1007	763	594
Acot2	776	509	408	797	706	389	296	295	503	368	370	668	645	497	440	827
Acot6	2	0	0	1	2	2	9	3	1	0	1	4	1	1	2	0
Acot7	1673	2174	2158	3212	2384	1576	2287	2215	1684	2176	1830	1622	2127	2152	1923	2440
Acot8	140	192	188	286	256	176	201	159	124	280	132	255	332	233	236	188
Acot9	240	289	312	460	372	307	480	350	271	376	188	433	608	553	486	298
Acox1	2579	1756	2300	3829	2950	1816	1967	2012	1967	1797	2575	2789	1570	2281	2569	3435
Acox2	35	23	2	17	8	4	5	3	11	14	1	14	1	4	6	32
Acox3	358	317	310	673	560	333	309	281	310	309	449	507	309	357	459	592
Acp1	1927	2288	2227	3219	2660	1944	2691	2174	2240	2420	1804	2292	3107	2690	2266	2523
Acp2	859	802	952	1568	1212	765	1112	879	839	1002	955	1140	869	1027	1003	1258
Acp5	14	34	42	77	101	83	154	127	34	94	15	96	178	197	161	52
Acp6	644	591	614	1069	874	499	451	455	640	631	550	730	714	649	623	802
Acp7	27	22	31	32	15	24	41	18	8	14	5	10	16	17	50	15
Acpp	429	336	341	562	289	247	606	410	376	356	244	347	323	429	540	505
Acrbp	45	57	52	88	33	54	57	28	22	63	43	43	26	39	32	45
Acsbg1	29	36	29	52	44	42	175	43	39	37	23	22	17	43	114	30
Acsbg3	0	6	8	1	1	0	2	1	0	3	0	5	3	3	1	2
Acsf2	1175	884	1047	2027	1178	923	872	949	1078	899	999	1486	648	972	1238	1663
Acsf3	548	569	506	937	732	552	514	424	537	524	468	633	643	546	525	701
Acsl1	447	353	567	775	643	400	753	539	487	417	465	543	477	556	642	591
Acsl3	3982	3222	3004	5715	3109	2967	3797	3411	3892	3299	3295	3343	3000	2761	3167	5418
Acsl4	961	816	909	1357	1002	739	883	889	820	807	922	923	1008	1071	1066	1623
Acsl5	1422	1569	1857	2675	2192	1707	2798	2131	1682	1830	1332	2266	2923	2939	2817	1946
Acsl6	44	45	13	57	30	30	20	20	51	18	24	20	16	14	17	53
Acsm3	3	11	0	11	10	6	0	3	1	7	10	6	7	2	6	1
Acss1	132	81	142	289	166	96	115	120	126	114	130	127	101	113	136	201
Acss2	427	328	295	457	383	251	232	251	270	318	324	380	298	271	357	652
Acta1	273	555	311	228	337	141	1233	567	98	938	96	198	485	405	2487	384
Acta2	395	976	608	767	455	329	887	471	260	405	222	191	202	485	310	398
Actb	40452	48559	66223	76690	57083	48994	51400	51048	53291	46458	42141	52251	51849	57450	61096	54939
Actc1	16	12	24	18	5	3	14	18	12	15	6	7	13	17	16	8
Actg1	59049	65203	65982	94153	73321	64619	53373	55462	71615	52068	47515	68174	61197	67639	77598	78780
Actg2	27	63	74	107	41	68	23	29	53	58	27	32	24	46	45	41
Actl10	3	0	1	4	4	4	10	3	1	4	14	3	3	10	1	5
Actl6a	1479	1962	1884	2650	1939	1628	2098	1816	1983	2172	1284	1601	2578	2191	2096	2038
Actn1	1416	1158	1922	2968	1971	1594	2401	1884	1824	1193	1606	1977	1044	1855	2296	2069
Actn2	36	64	52	38	24	20	49	53	27	53	16	38	22	50	164	26
Actn3	58	83	77	60	73	10	314	123	21	57	26	41	101	58	278	99
Actn4	7362	6720	9802	13521	12030	6957	11298	9312	7929	6143	8005	9742	6773	10107	10289	10339
Actr10	1768	2012	2017	2921	2519	1842	2138	1903	1966	2569	1510	2168	3084	2508	2173	2305
Actr1a	1983	2191	2715	3793	3096	1992	3368	2791	2048	2394	2168	2398	2616	2875	3048	3060
Actr1b	3598	3956	4519	6484	4596	3498	5138	4250	4132	4188	3422	3930	4178	4648	4726	5218
Actr2	4704	4407	5355	7529	6304	4577	5239	5085	4876	4177	4172	5336	5360	5986	6159	6315
Actr3	6720	6760	7436	10972	8848	7503	8545	7753	8288	8471	6030	8796	12706	10978	9997	8415
Actr3b	86	103	76	117	116	90	72	66	91	115	71	103	125	116	81	120
Actr5	190	295	339	456	370	270	279	237	197	285	240	245	259	299	335	368
Actr6	259	338	285	478	389	318	351	265	282	448	243	329	655	500	322	318
Actr8	457	545	609	886	690	506	522	542	572	527	483	607	606	605	631	652
Actrt3	0	4	2	3	1	0	4	3	1	3	0	0	0	0	0	4
Acvr1	960	771	755	1468	1010	949	918	874	950	604	833	1063	616	952	1063	1281
Acvr1b	366	239	293	544	355	300	325	232	339	299	355	355	221	275	372	550
Acvr2a	554	327	527	766	537	419	612	487	474	510	450	580	536	516	602	793
Acvr2b	90	46	66	156	89	58	97	69	51	57	82	66	28	78	55	125
Acvrl1	1191	1036	1119	1759	1199	1055	1069	876	1357	1135	1156	1095	1013	1028	1068	1497
Acy1	173	220	204	324	266	155	219	181	270	170	130	189	186	159	199	211
Acy3	144	162	127	225	286	103	75	107	128	124	180	128	144	126	131	223
Acyp1	145	203	125	241	225	139	81	100	116	217	87	170	238	169	134	203
Acyp2	42	60	96	90	72	57	81	60	38	96	37	64	125	136	86	78
Ada	80	93	113	116	135	102	129	109	75	142	78	128	250	171	167	120
Adal	171	136	226	296	233	130	190	140	197	221	187	211	218	275	197	206
Adam10	2278	1657	2477	3827	3051	1868	3535	2615	1972	2113	2203	2873	2270	2990	3099	3362
Adam11	30	33	16	55	60	18	25	31	36	27	35	33	10	27	25	73
Adam12	7741	3727	6316	10348	6199	2078	4268	4765	4779	4202	7867	4571	1117	3211	3345	12237
Adam15	1042	1242	1116	1920	1573	1024	1790	1266	1116	1022	1060	1369	1030	1269	1478	1293
Adam17	1889	1523	1981	3086	2180	1592	2962	1912	2080	1632	1912	1960	1577	1954	2390	2524
Adam19	174	157	174	331	179	97	403	213	177	183	175	119	43	133	128	269
Adam1a	23	26	16	68	27	25	22	14	24	40	36	23	13	18	9	33
Adam22	19	8	18	46	21	16	31	32	10	0	35	10	15	8	15	35
Adam23	262	206	280	467	222	181	375	238	266	293	274	169	60	167	218	337
Adam33	8	4	7	18	14	16	15	8	4	18	21	12	5	11	15	12
Adam4	0	0	4	9	4	10	9	5	0	8	10	2	1	5	9	2
Adam8	83	224	206	437	628	284	611	288	126	260	82	605	759	510	625	222
Adam9	4442	3185	4559	7489	4860	3882	6293	4888	4704	3645	3606	4371	3579	4544	4957	5654
Adamts1	2577	1194	1923	3486	1963	1787	2155	2057	2001	1080	1716	1965	1077	1745	2336	2567
Adamts10	281	281	241	577	302	242	351	241	281	335	308	243	200	346	294	380
Adamts12	417	170	359	510	412	172	436	316	291	240	355	308	89	258	271	571
Adamts13	38	49	45	72	46	86	20	31	41	40	54	68	66	32	15	50
Adamts14	193	171	285	308	604	209	317	267	166	105	206	267	196	474	319	286
Adamts15	0	2	0	22	4	9	45	4	1	3	8	7	0	3	30	2
Adamts17	4	1	0	9	5	6	8	8	4	0	2	10	4	4	2	6
Adamts2	112	177	180	313	139	105	394	172	108	101	59	110	62	126	205	150
Adamts20	234	224	326	559	249	253	575	416	262	332	405	226	133	304	312	323
Adamts4	1026	756	1013	1621	1186	747	878	858	1068	720	1145	1110	517	869	1030	1746
Adamts5	93	91	96	222	119	60	171	100	87	103	77	72	50	102	121	163
Adamts6	27	16	40	73	45	26	77	39	25	20	26	30	15	53	25	41
Adamts7	62	85	60	87	74	39	131	52	67	63	50	61	24	45	36	75
Adamts8	0	1	0	1	0	0	2	2	0	0	0	1	1	3	6	2
Adamts9	87	82	110	128	87	39	173	127	68	87	95	76	13	102	103	140
Adamtsl1	4	6	6	12	5	6	21	9	4	7	1	4	1	12	13	12
Adamtsl2	39	60	60	134	75	118	60	80	74	87	86	100	77	75	82	64
Adamtsl4	318	211	306	558	502	260	369	281	222	322	272	476	256	376	540	409
Adamtsl5	147	213	159	338	284	252	326	276	210	176	238	233	145	269	231	247
Adap1	14	14	12	17	26	31	28	16	12	22	2	44	55	73	69	10
Adap2	8	15	10	27	32	17	40	24	21	15	4	42	42	48	54	23
Adar	1162	1010	1366	2217	2223	1282	1247	1192	1007	999	1188	2614	1490	2027	2230	1814
Adarb1	139	137	210	349	221	166	297	210	171	159	191	201	90	185	199	279
Adat1	123	129	175	245	169	155	139	111	126	166	154	205	155	167	161	165
Adat2	90	93	116	174	105	73	121	107	85	158	73	106	148	136	116	122
Adat3	22	65	55	85	54	54	77	59	50	39	35	64	51	57	54	54
Adck1	407	462	515	870	825	526	626	530	472	518	475	630	676	677	700	615
Adck2	615	609	585	1022	869	713	585	580	718	609	558	736	863	695	849	846
Adck5	219	242	267	393	339	224	266	185	235	305	165	209	311	286	256	296
Adcy1	2	1	0	1	8	26	31	5	1	0	2	5	3	7	5	0
Adcy10	0	3	5	4	1	2	0	1	8	1	1	0	3	4	0	0
Adcy2	15	16	18	65	38	56	61	29	65	37	21	41	43	20	53	40
Adcy3	1079	927	1166	1848	1556	861	1326	996	1155	742	1159	1369	780	1239	1437	1428
Adcy4	18	46	30	55	38	31	95	44	31	29	22	29	11	42	33	25
Adcy5	10	7	3	9	7	7	22	2	3	6	9	10	1	8	6	6
Adcy6	709	677	720	1211	832	513	744	537	639	448	743	569	306	547	628	1208
Adcy7	1663	1330	2725	4039	3301	2310	3143	2677	2401	2112	2539	3168	1886	3536	3219	2896
Adcy9	158	67	172	290	218	109	157	141	148	101	211	210	106	189	222	339
Adcyap1r1	9	3	10	50	22	25	17	12	10	13	12	6	1	23	21	31
Add1	1853	1790	2086	3278	2636	1844	2119	1911	1867	1840	2098	2493	1984	2306	2425	2736
Add2	7	1	13	7	7	7	10	13	3	1	3	6	1	8	3	2
Add3	748	603	687	1116	874	565	770	672	609	507	593	958	683	830	1003	944
Adgb	290	148	268	682	146	380	242	259	312	280	316	455	204	338	349	360
Adgra2	1191	1030	1341	2439	1571	1161	1616	1362	1357	1005	1529	1395	672	1221	1585	1883
Adgra3	2624	2022	2545	4313	2461	1805	3591	2576	2777	2247	2504	2069	1382	2015	2534	3522
Adgrb2	0	1	0	3	6	6	8	0	0	0	1	0	0	1	3	6
Adgrd1	5	4	2	27	14	14	45	11	0	8	4	2	1	16	24	1
Adgre1	21	73	60	167	208	158	334	171	58	167	24	272	369	332	602	99
Adgre4	0	0	0	1	5	1	0	0	3	5	0	4	8	7	7	0
Adgre5	850	738	1184	1625	1170	1045	1549	992	949	824	872	1328	841	1229	1439	1141
Adgrf2	0	0	3	2	1	2	18	4	0	3	1	4	0	5	4	2
Adgrf3	1	0	0	3	0	3	2	1	2	0	0	1	4	4	2	1
Adgrf4	4	2	1	2	0	0	82	4	3	0	2	4	23	3	60	4
Adgrf5	318	292	306	399	360	184	474	275	229	228	219	280	89	264	226	396
Adgrg1	1668	1419	1956	2553	2305	1385	3561	2036	1354	1246	2019	1577	537	1664	1439	2196
Adgrg3	11	2	12	19	18	12	35	18	9	5	15	5	10	14	9	13
Adgrg5	0	0	3	2	3	3	2	0	0	4	0	3	5	10	10	0
Adgrg6	1	1	1	3	5	3	27	2	1	4	0	6	6	4	20	4
Adgrl1	557	439	557	1126	876	548	580	428	561	482	624	633	194	524	685	894
Adgrl2	3799	2518	3913	6498	3845	2900	4256	3748	4029	2573	3535	4282	1772	3458	3944	5912
Adgrl3	4	0	2	2	4	3	8	6	2	2	0	2	1	1	2	4
Adgrl4	123	159	134	196	224	114	177	168	132	161	107	132	125	162	148	161
Adgrv1	5	3	3	3	1	2	0	2	3	9	4	1	2	2	2	0
Adh1	34	51	27	74	60	65	61	47	47	59	33	39	81	48	55	52
Adh5	1644	1893	1715	2806	2387	1626	1988	1717	1903	1810	1447	1843	2535	2162	2088	2364
Adh6b	0	4	1	10	1	0	8	3	0	6	0	1	23	1	7	6
Adh7	50	60	26	51	50	61	49	26	64	56	18	61	85	71	77	48
Adhfe1	626	624	432	1145	740	653	413	474	791	687	581	840	707	596	740	916
Adi1	1587	1918	1701	3196	1930	1853	2263	1806	1798	2615	1406	2116	2546	2200	2241	2318
Adipoq	0	2	3	9	3	0	9	1	1	11	0	0	1	4	7	2
Adipor1	3120	3442	3567	5203	4234	2780	3947	3293	3375	4010	2864	3440	4177	3672	3657	4381
Adipor2	1998	1877	2078	3223	2317	1674	2612	2268	2141	2081	1929	2395	2015	2214	2645	3022
Adk	526	598	682	1032	624	504	882	617	628	834	457	485	702	747	694	692
Adm	809	664	1024	1099	1235	922	582	720	638	588	736	1053	1166	949	915	892
Adnp	2147	820	2105	3169	1484	950	1590	1854	1894	1221	1811	2211	1064	1624	1720	3143
Adnp2	586	454	501	971	536	465	670	558	577	539	536	606	464	656	629	823
Ado	930	1134	1070	1679	1262	970	1078	1006	1121	944	881	1180	907	1126	1185	1333
Adora2a	10	11	8	21	12	10	31	23	17	18	10	19	12	17	22	12
Adora2b	15	14	11	39	31	31	46	10	34	30	25	8	21	18	26	15
Adora3	0	0	1	1	0	1	1	0	0	0	0	2	4	1	7	1
Adpgk	1061	889	1117	2080	1222	893	1483	980	942	1338	1080	1118	1325	1328	1357	1432
Adprh	1407	1632	1587	2422	1784	1392	1628	1506	1454	1812	1330	1529	2370	1829	1688	1723
Adprhl1	0	0	3	1	4	0	4	2	0	3	2	0	1	3	3	2
Adprhl2	388	605	521	868	642	495	569	517	514	761	394	553	839	716	641	515
Adprm	178	192	185	357	262	197	229	163	146	264	124	190	288	261	221	213
Adra2a	6	23	31	36	13	18	69	50	17	14	12	16	7	9	14	22
Adra2b	0	1	2	2	3	2	0	2	0	0	0	1	0	0	1	1
Adrb1	0	0	0	5	1	1	2	1	2	0	1	1	1	1	6	0
Adrb2	4	2	2	16	3	15	72	13	3	4	3	5	10	17	30	1
Adrm1	2011	2823	2606	3986	3100	2196	2967	2498	2562	2540	2017	2588	3061	2915	3202	2829
Adsl	1826	2310	2478	3696	2783	2178	2685	2606	2467	3346	2011	2749	4666	3471	3080	2413
Adss	1081	1060	1198	1865	1526	1036	1371	1194	1271	1262	959	1276	1821	1537	1294	1432
Adssl1	415	419	419	530	793	178	465	367	246	244	555	311	234	430	310	631
Aebp1	7565	5940	8301	13995	8164	7573	9987	7502	6787	5999	7435	9277	3854	8001	9734	9724
Aebp2	4133	4193	3996	6937	5473	3731	3492	3368	3932	3232	4209	4628	2412	4190	4408	5894
Aen	1044	1358	1143	1927	1276	912	1251	1102	1045	1185	1041	1119	1398	1322	1183	1817
Afap1	658	455	732	1180	831	488	685	702	594	495	700	745	350	735	769	876
Afap1l1	107	106	144	139	110	75	153	120	98	77	83	58	45	61	62	144
Afap1l2	126	80	108	238	124	33	143	110	57	41	127	33	16	43	33	138
Afdn	2605	1828	2704	4644	3049	2222	3155	2702	2401	2055	2893	3076	1112	2885	3078	3611
Aff1	809	491	905	1356	994	685	852	880	622	466	827	1236	426	1066	1080	1186
Aff3	718	473	735	1348	849	671	904	814	584	603	918	962	340	840	953	1034
Aff4	4876	2527	3973	7031	4435	3074	3787	3817	3577	3196	4294	5410	2737	4159	4115	6767
Afg1l	138	169	222	375	281	234	276	249	197	258	236	236	316	296	293	241
Afg3l1	1669	1846	1838	2931	2227	1696	2149	1741	1878	1522	1510	1804	1567	1914	2095	2197
Afg3l2	1657	1591	1828	2975	2365	1474	2344	1878	1844	1461	1727	1968	1363	1945	2056	2367
Afmid	249	182	220	368	307	207	191	195	262	246	224	226	222	259	197	290
Aftph	973	905	824	1427	1186	860	841	824	952	789	915	1078	809	1038	1043	1299
Aga	463	665	582	875	768	534	696	582	488	753	461	605	1014	888	676	692
Agap1	957	893	983	1755	1502	1023	949	895	957	685	973	1521	579	1141	1269	1602
Agap2	19	10	8	34	22	49	29	20	11	5	3	21	9	30	24	9
Agap3	949	1230	1179	1684	1283	975	1125	944	1149	771	1008	1051	752	1036	1116	1335
Agbl2	18	4	22	27	22	12	9	9	9	23	17	12	19	18	34	16
Agbl3	84	94	95	171	108	78	108	93	79	123	86	144	144	120	104	120
Agbl5	404	280	375	637	416	294	268	325	417	262	381	458	216	273	343	610
Ager	29	37	19	60	44	15	48	7	21	20	26	12	9	17	7	41
Agfg1	2011	1854	2189	3215	2756	1992	2368	2324	1950	1968	2064	2641	2451	2813	2835	2709
Agfg2	213	266	216	304	281	209	244	219	222	226	214	277	258	228	292	425
Aggf1	887	947	1069	1546	1233	834	1111	1011	974	723	859	1036	574	999	1100	1315
Agk	756	754	762	1430	956	796	968	869	787	859	706	814	815	906	921	1073
Agl	1284	1015	1299	2160	1569	1089	1184	1312	1192	1080	1415	1572	1085	1285	1597	2031
Agmo	15	7	16	16	16	20	13	15	5	9	13	10	20	28	37	16
Ago1	680	435	817	1203	898	510	946	821	632	556	838	764	316	768	899	1212
Ago2	7743	4179	8297	15009	9612	7747	7161	7742	7705	6067	9596	12568	3787	9839	11486	11593
Ago3	389	260	378	700	376	232	410	346	253	318	517	514	137	442	357	566
Ago4	2	7	6	12	3	4	11	11	3	3	2	11	4	17	34	8
Agpat1	1680	2200	2455	3406	2450	1916	3239	2464	2287	2299	2078	2270	1529	2100	2252	2743
Agpat2	423	398	410	591	597	312	490	375	361	503	308	430	575	482	434	497
Agpat3	2596	2523	2921	4818	3326	2338	3596	3091	2762	2694	2520	3024	2209	2670	2989	3929
Agpat4	409	364	295	527	326	246	393	350	331	314	318	237	218	277	318	488
Agpat5	1525	1791	1958	2722	1809	1719	2410	1800	1868	1998	1623	1668	2005	1841	1809	2027
Agps	1722	1535	2075	3064	2146	1495	2121	2174	1907	2085	1762	2169	2330	2575	2452	2675
Agrn	2428	1725	2094	4106	3128	1702	2239	1714	2107	1637	2347	2412	821	2178	2407	3480
Agrp	1	5	5	0	2	0	0	3	7	0	2	4	0	7	2	4
Agt	188	175	362	295	405	238	517	404	129	248	325	306	350	327	325	214
Agtpbp1	182	119	153	353	184	155	257	171	173	159	194	210	138	205	224	255
Agtr1a	8	15	3	17	7	19	20	12	17	13	3	5	4	4	8	21
Agtrap	459	546	422	853	543	531	535	470	541	455	429	774	721	646	696	689
Ahctf1	1763	1406	2057	2976	2138	1573	2092	2069	1722	1389	2229	2107	1111	1985	2111	2593
Ahcy	3568	4112	4620	6110	4289	3161	5691	4758	4371	5625	3019	3842	5835	5054	4567	4630
Ahcyl1	2972	2388	2969	4609	4063	2474	2952	2823	2732	2467	2793	3389	2615	3030	3273	3951
Ahcyl2	948	829	1146	1805	1177	1026	1237	1264	921	816	1020	1338	766	1169	1559	1514
Ahdc1	380	288	329	657	354	262	300	259	342	209	410	372	116	262	412	592
Ahi1	915	852	768	1636	1070	934	820	790	947	726	800	1067	953	956	984	1158
Ahnak	338	335	462	1017	1058	609	2074	670	284	454	488	705	317	990	1334	506
Ahnak2	1336	1338	1169	2902	3311	1654	1300	963	840	1528	2233	2098	422	1921	1157	2465
Ahr	450	197	371	542	546	336	273	258	419	192	372	452	209	364	372	378
Ahrr	46	19	19	57	50	28	37	36	43	50	33	48	27	33	39	53
Ahsa1	2365	3168	3335	5299	4025	3348	4476	3599	3099	4383	2666	3263	5456	4352	4427	3377
Ahsa2	818	1298	1060	1572	1275	1082	1280	1088	897	917	993	899	744	870	1057	1238
Ahsg	6	3	4	3	4	13	5	1	10	117	3	6	2	8	5	1
AI182371	1	2	2	4	2	3	0	3	5	7	1	2	1	0	1	2
AI197445	0	3	10	7	7	10	3	3	8	7	8	3	6	9	6	1
AI413582	323	624	455	789	676	541	424	375	364	1030	319	646	1078	856	573	466
AI427809	3	22	19	42	14	27	20	34	10	18	24	14	15	28	40	15
AI429214	106	96	166	230	221	164	131	104	90	160	140	164	153	194	129	136
AI463229	1	2	6	12	4	4	5	3	2	5	3	3	1	3	1	12
AI467606	1	14	18	49	12	24	30	27	4	53	11	31	55	31	70	22
AI480526	37	32	46	113	30	38	24	27	29	40	62	51	9	42	21	66
AI504432	0	3	5	14	6	12	6	5	0	1	0	11	11	12	33	3
AI506816	8222	8256	10597	16343	11033	8318	17025	11822	9744	9166	8840	9340	6826	10094	10215	11121
AI597479	1013	752	831	1521	1030	692	876	878	886	924	852	937	991	932	944	1398
AI661453	10	6	7	16	17	14	154	13	2	7	8	7	17	21	61	12
AI662270	992	1418	1280	1903	1306	1187	1265	1105	988	1686	1109	1290	1817	1661	1188	1315
AI837181	426	462	461	763	666	398	436	457	416	427	377	510	528	519	533	631
AI839979	12	5	10	14	7	13	8	13	9	11	12	19	13	12	11	11
AI847159	1	2	2	0	0	0	1	11	0	0	1	2	1	0	3	2
AI854703	5	5	8	7	13	15	3	5	1	5	7	7	2	2	2	6
AI987944	267	241	264	419	287	234	308	273	237	294	265	330	370	356	265	395
Aida	488	658	822	1108	1017	626	1010	832	649	1034	602	806	1275	1307	1140	726
Aif1	7	14	14	42	52	66	40	17	8	49	0	64	168	162	181	13
Aif1l	437	455	537	614	574	259	577	648	192	474	594	449	450	499	375	586
Aifm1	1049	1047	1126	1729	1296	915	1419	1265	1073	889	1089	1038	898	1132	1258	1273
Aifm2	219	282	233	363	345	190	257	264	213	191	210	320	306	256	293	317
Aifm3	10	4	5	11	7	6	7	2	6	3	11	6	4	8	2	7
Aig1	210	207	200	389	310	297	275	202	285	280	179	314	332	266	292	308
Aim2	2	4	8	19	20	18	30	3	8	27	8	19	42	28	39	16
Aimp1	1563	1991	1761	2502	2168	1593	2119	1671	1706	2302	1298	1851	2619	2325	1974	2006
Aimp2	653	702	875	1220	827	664	1023	926	703	1417	602	797	1536	1356	1051	790
Aip	581	905	735	1265	958	720	732	688	645	1206	515	875	1577	1046	927	803
Aipl1	12	13	4	16	5	6	5	10	7	1	8	10	7	11	3	8
Aire	1086	944	1111	2259	1723	1219	493	609	987	1193	1232	1354	773	1222	672	1419
Airn	27	20	16	65	39	12	20	16	27	25	36	27	17	39	20	42
Ajm1	100	93	55	264	137	117	126	84	111	88	109	165	20	103	146	158
Ajuba	603	752	796	1075	737	573	865	756	711	522	504	519	424	628	922	776
Ak1	332	535	337	471	549	283	339	335	242	391	376	340	384	343	337	563
AK157302	3	8	7	4	5	0	3	2	3	2	1	2	7	1	1	4
Ak2	2362	3027	3097	4535	3185	2915	3601	3239	2551	2808	2003	3168	4469	3960	4062	3198
Ak3	1671	1641	2064	3162	2359	1880	2860	2406	1891	2038	1679	2415	2457	2727	2660	2311
Ak4	1839	1507	2310	2656	2167	1301	1663	1917	1528	1584	2425	1699	1441	1901	1855	2818
Ak5	10	9	8	15	32	12	19	12	20	15	6	16	12	19	15	9
Ak6	2209	2321	2323	3322	2473	1949	2751	2198	2328	3338	1671	2246	3789	3145	2315	2455
Ak7	4	0	2	5	0	0	0	2	0	1	1	3	0	1	3	1
Ak8	7	1	1	9	9	7	5	0	5	5	16	17	7	8	9	10
Akap1	1529	1138	1661	2468	1620	1036	2362	1659	1342	1258	1562	1560	1048	1647	1589	2082
Akap10	906	785	946	1577	1013	748	911	1000	892	1279	949	1233	1339	1308	1362	1416
Akap11	1219	924	1365	1995	1478	1027	1428	1273	877	931	1596	1540	737	1312	1417	1992
Akap12	485	301	448	596	730	181	471	368	266	230	323	367	111	291	267	597
Akap13	402	269	483	969	674	448	744	574	364	330	594	635	221	574	755	666
Akap17b	99	66	118	103	91	56	89	94	80	103	106	76	46	72	97	122
Akap3	2	0	3	6	0	3	0	1	2	5	5	2	5	1	0	1
Akap5	8	6	15	26	11	14	25	9	4	5	22	7	7	25	3	11
Akap6	82	72	142	164	122	96	186	116	86	96	117	103	82	138	120	87
Akap7	547	479	575	966	783	628	612	542	671	621	470	665	667	710	552	650
Akap8	2189	2075	2769	4408	2651	2119	2980	2592	2147	1920	2393	2628	1510	2711	2813	2998
Akap8l	779	590	646	1207	980	520	566	494	474	648	837	742	593	607	560	922
Akap9	1438	825	1615	2798	1742	1153	2049	1764	1060	1093	2019	1834	362	1588	1539	2394
Akip1	268	378	314	483	453	267	349	283	295	341	220	302	508	438	305	392
Akirin1	933	1134	965	1528	1141	808	1102	1094	997	1215	872	1028	1706	1298	1201	1327
Akirin2	1033	1110	963	1666	1245	1203	1050	1028	1231	1016	844	1146	1083	1184	1121	1260
Akna	490	320	327	677	443	313	329	351	414	302	318	564	196	428	429	644
Akr1a1	9076	10779	8467	15156	11521	9008	8597	8057	9767	12804	6898	11197	15701	11261	11064	11531
Akr1b10	435	541	573	896	635	561	606	616	482	597	482	688	854	817	791	670
Akr1b3	2403	3036	3130	4651	3181	2894	3469	3196	3092	4494	1997	2963	5213	4407	3687	3079
Akr1b7	73	79	12	72	20	27	3	7	31	32	14	54	10	10	17	90
Akr1b8	1121	1296	1420	1675	1716	1021	1383	1279	990	1247	1175	1168	1393	1382	1146	1498
Akr1c12	1	4	1	3	6	7	5	6	1	3	1	7	12	10	4	5
Akr1c13	126	144	106	249	242	171	75	91	119	243	136	240	363	209	142	163
Akr1c14	5	6	6	8	2	2	8	1	5	17	0	2	8	6	14	0
Akr1e1	377	544	472	767	670	478	550	507	561	733	471	520	858	660	544	569
Akr7a5	291	429	358	607	478	364	409	355	407	394	313	361	439	422	474	419
Akt1	13884	14128	18468	25878	19294	13113	22061	18198	16388	17109	14484	15902	16618	18069	17906	18121
Akt1s1	1715	2159	1946	2933	2318	1529	2379	1940	1749	1964	1559	1835	1876	2038	2288	2270
Akt2	1859	2115	2189	3360	2405	1968	2459	2135	2034	2098	1801	2180	2043	2146	2529	2651
Akt2-ps	0	1	2	2	2	1	2	0	3	0	2	1	1	1	2	3
Akt3	765	543	615	1118	808	562	563	778	622	604	693	877	686	823	788	1172
Aktip	483	514	522	759	518	468	656	490	529	592	493	479	579	512	425	706
Alad	324	541	416	607	487	344	503	477	379	420	300	427	631	598	568	421
Alas1	1269	1327	1301	2041	1805	893	1334	1287	943	1314	1257	1345	1496	1473	1543	1834
Alas2	76	154	1581	251	66	88	225	181	85	190	219	8	23	187	67	98
Alcam	163	120	172	294	164	155	322	184	141	167	117	154	141	201	177	160
Aldh16a1	617	756	636	1159	879	750	579	525	699	606	546	758	796	760	829	812
Aldh18a1	3335	2169	1642	3784	2282	1821	1694	1645	2922	1943	1324	2741	2021	2062	2325	3388
Aldh1a1	2	7	17	14	11	5	14	6	1	38	6	12	11	14	34	3
Aldh1a2	0	5	2	3	3	2	5	1	0	2	0	3	13	1	4	3
Aldh1a3	43	57	105	117	57	57	313	98	79	109	93	39	38	94	78	113
Aldh1a7	12	3	3	1	1	0	0	1	0	8	0	1	0	0	8	0
Aldh1b1	46	53	29	91	116	52	22	16	60	26	56	81	61	55	52	65
Aldh1l1	1176	1041	1041	1574	1423	1111	732	803	1009	699	896	1745	1419	1214	1496	1687
Aldh1l2	3068	1640	1188	2948	1906	1007	925	1100	1466	1546	1388	2275	1081	1548	1258	3862
Aldh2	3768	3495	3313	6115	4526	3050	2697	2676	3859	2941	3029	3930	4039	3070	3496	5094
Aldh3a1	1	43	27	1	0	2	4	2	0	0	2	35	37	54	100	38
Aldh3a2	683	682	581	1091	828	578	604	571	648	681	556	820	777	685	802	968
Aldh3b1	381	388	351	505	430	299	299	306	320	390	374	345	451	357	374	553
Aldh3b2	0	6	1	1	4	1	186	2	63	2	0	0	12	24	74	0
Aldh4a1	437	523	455	817	570	411	744	609	447	436	525	510	542	443	636	874
Aldh5a1	333	243	245	536	375	261	244	244	388	245	306	319	238	255	262	449
Aldh6a1	703	536	418	893	794	431	316	371	549	487	511	709	525	486	531	927
Aldh7a1	618	639	794	1197	705	693	767	665	593	666	562	798	754	802	874	866
Aldh9a1	2034	1775	1975	3353	2193	1662	1854	1926	2165	2348	1512	2141	2955	2231	2453	2666
Aldoa	65299	74693	74843	108030	89362	67248	53787	63544	68228	79331	61539	85093	104545	83555	81885	90474
Aldoart1	1	1	1	1	0	1	0	0	4	0	0	0	1	3	0	3
Aldoc	2666	2229	2223	3443	3067	1530	770	1477	1712	2159	2552	2383	2315	1830	1942	3938
Alg1	682	768	624	1033	910	603	796	606	681	663	527	658	722	696	707	820
Alg10b	3423	2247	3161	4985	3836	2049	4204	2921	2872	2381	3174	2875	1627	2721	2526	4562
Alg11	464	367	499	667	492	343	502	435	359	456	464	540	673	535	457	542
Alg12	276	248	329	548	419	318	436	349	333	462	282	350	498	446	446	380
Alg13	242	191	275	459	300	226	280	253	255	287	240	264	291	315	272	285
Alg14	610	872	693	1340	727	717	985	798	794	956	672	778	872	860	909	908
Alg2	1482	1538	1296	2283	1544	1171	1775	1490	1253	1453	1303	1525	1483	1462	1659	2097
Alg3	313	422	517	727	545	437	633	459	520	481	438	470	393	493	577	550
Alg5	798	1082	964	1556	1068	839	1258	904	913	1559	744	1080	1475	1396	990	1095
Alg6	658	691	745	1469	885	702	1032	827	852	982	661	855	969	1000	807	999
Alg8	453	480	555	1076	620	520	866	567	532	482	469	669	523	600	588	599
Alg9	765	837	995	1465	1067	830	1180	973	891	816	818	975	854	826	1006	1094
Alkbh1	549	574	516	1035	603	480	609	453	476	694	460	579	741	808	517	687
Alkbh2	124	238	152	225	176	158	182	168	158	245	111	144	325	244	196	204
Alkbh3	603	612	626	925	833	568	619	553	578	923	563	733	972	849	686	715
Alkbh3os1	3	0	3	3	4	2	2	0	0	1	4	1	1	7	1	1
Alkbh4	83	109	118	169	138	99	140	93	118	111	83	141	106	125	111	149
Alkbh5	5497	4081	5077	7255	6264	3706	4134	4187	4867	4006	4495	5689	3202	4990	5754	7082
Alkbh6	469	600	476	884	651	485	476	425	526	680	416	522	601	582	534	601
Alkbh7	170	292	303	474	280	259	331	313	228	458	153	370	667	527	354	324
Alkbh8	506	430	626	884	615	449	662	552	501	531	493	546	672	655	633	769
Alms1	521	374	638	936	548	425	743	665	444	489	795	572	336	646	667	769
Alox12	3	1	21	7	4	4	23	6	5	2	3	3	1	4	7	6
Alox5	1	2	0	15	8	5	18	6	3	4	3	8	4	4	15	3
Alox5ap	12	80	40	100	127	99	195	79	25	110	9	122	298	181	259	33
Aloxe3	10	5	8	23	12	13	28	10	4	11	10	5	5	3	30	7
Alpk1	104	71	146	287	171	80	72	102	72	107	175	216	101	183	223	203
Alpk3	8	8	4	13	10	4	17	14	1	8	4	4	4	9	17	8
Alpl	9	12	1	5	5	4	4	2	5	3	2	10	6	5	7	6
Als2	1210	973	1529	2488	1548	1223	1720	1618	1376	1248	1507	1775	907	1504	1857	1977
Als2cl	184	92	125	334	183	129	215	109	116	139	155	225	131	194	211	216
Alx1	518	564	504	862	662	466	504	467	578	536	413	653	604	591	585	674
Alx4	0	1	0	8	2	2	0	0	0	2	1	1	0	0	4	2
Alyref	1884	2475	2786	3721	2256	1967	2999	2520	2386	2932	1776	2139	3398	2818	2520	2565
Alyref2	66	54	54	66	84	48	28	46	31	57	29	48	40	59	44	46
Amacr	351	433	454	601	619	387	467	381	377	455	338	424	681	398	467	405
Ambra1	903	686	976	1649	1312	660	847	848	796	720	956	1062	597	1020	994	1227
Amd-ps3	10	5	10	24	18	9	30	16	8	6	18	13	20	28	17	32
Amd1	1736	2311	2323	3244	2470	1702	3285	2479	1820	2421	2021	1886	2410	2511	2504	2727
Amd2	1	8	5	13	13	5	16	4	9	8	10	2	8	8	20	6
Amdhd1	69	59	87	168	77	153	78	61	131	100	69	97	155	87	124	87
Amdhd2	773	1021	790	1556	1173	1085	654	678	1072	1141	729	1109	1480	1026	1080	1013
Amer1	160	84	147	335	140	97	205	127	112	147	115	168	72	187	159	216
Amer2	1	0	0	1	2	1	8	1	6	0	2	0	0	1	2	0
Amfr	4115	3892	3746	6293	4810	3462	4841	3984	4364	3973	3363	4363	5260	4780	4782	5734
Amh	5	2	5	6	9	7	11	7	4	5	8	6	5	6	3	13
Amhr2	38	30	30	38	48	33	24	29	24	48	34	17	29	29	30	41
Amigo1	35	18	13	30	17	10	37	17	9	28	19	13	17	15	31	39
Amigo2	4	4	0	1	10	6	35	7	9	7	2	8	3	8	11	9
Amigo3	43	53	35	139	58	39	67	52	37	70	71	53	20	44	55	62
Ammecr1	155	148	290	387	180	139	404	253	167	175	174	187	152	253	258	276
Ammecr1l	631	579	774	1109	720	614	726	719	692	662	704	838	663	766	906	1078
Amn	8	4	3	11	5	4	2	5	3	9	5	4	3	5	7	8
Amn1	227	209	253	457	265	214	231	182	221	350	234	264	273	324	238	306
Amot	142	108	152	200	106	94	155	120	95	99	139	147	65	118	151	183
Amotl1	5680	4063	5308	9124	6510	3783	4967	4781	5100	3631	5295	5951	2387	4746	5379	8513
Amotl2	701	823	777	1723	570	633	1155	910	878	849	821	840	410	699	1016	1156
Ampd1	9	3	4	6	5	1	18	11	3	7	4	7	10	6	17	9
Ampd2	763	812	837	1485	1028	737	1027	840	894	662	818	761	482	850	1051	1137
Ampd3	122	152	179	304	234	211	246	257	174	152	228	283	142	197	254	263
Amph	2	0	0	2	3	4	0	1	0	0	1	1	1	2	0	1
Amt	40	28	28	63	29	22	30	24	34	47	46	41	13	33	20	53
Amy1	3	1	1	5	13	2	5	2	7	11	12	7	0	0	1	4
Amz1	31	36	26	73	59	37	34	22	31	51	11	49	82	50	63	40
Amz2	925	1061	1003	1686	1183	967	1190	1034	1137	1143	955	1087	939	1027	1156	1350
Anapc1	4051	2900	4118	6812	4336	3139	4474	4087	3927	3086	3959	4645	2363	4165	4465	5536
Anapc10	138	199	189	282	216	157	267	227	168	320	179	185	286	312	233	232
Anapc11	877	1385	1342	2032	1359	1250	1390	1084	1340	2275	902	1230	2096	1662	1473	1361
Anapc13	421	561	488	800	519	513	468	378	465	664	363	557	769	623	539	568
Anapc15	374	434	415	734	418	450	602	478	478	585	355	425	559	574	447	436
Anapc16	726	938	760	1301	803	708	981	733	739	1171	507	866	1278	1118	891	1037
Anapc2	890	867	999	1584	1219	874	971	840	909	885	867	1057	987	986	1113	1100
Anapc4	1552	1593	1808	2468	2169	1367	1646	1598	1682	1371	1654	1670	1865	1729	1719	2090
Anapc5	6589	6492	6951	11183	7357	6148	8687	6676	7821	7044	5672	6729	5795	7050	7181	8558
Anapc7	1576	1639	1666	2736	1927	1411	1568	1498	1660	1770	1294	1788	2351	1875	1798	1902
Ang	4	6	6	5	8	2	33	4	8	15	2	9	13	9	13	5
Angel1	114	121	126	224	180	129	205	119	115	143	116	141	86	145	172	134
Angel2	788	605	756	1219	1014	644	843	839	816	808	735	786	797	799	848	996
Angpt1	1	4	9	8	5	7	18	19	3	6	0	14	39	26	30	2
Angpt2	762	1000	894	1309	1135	633	879	805	799	829	701	983	883	898	722	818
Angpt4	0	2	1	11	8	1	2	2	1	7	0	0	4	4	4	0
Angptl1	2	2	0	2	3	1	2	2	1	0	0	0	0	0	1	1
Angptl2	1688	1469	2406	3957	3349	1622	3641	2525	1874	2404	2402	2592	1788	2932	2367	2693
Angptl4	71	146	71	126	114	77	158	54	51	109	48	99	65	75	95	86
Angptl6	103	84	32	112	83	74	25	44	55	93	27	82	92	73	40	107
Angptl7	0	1	1	0	3	0	7	1	0	0	2	5	5	2	6	1
Ank	250	201	214	431	438	220	406	295	260	300	213	281	210	263	302	356
Ank1	11	4	22	39	21	19	22	21	11	6	11	10	7	8	28	31
Ank2	1389	763	1071	1982	1296	830	862	936	960	912	1105	1613	558	1183	1470	1870
Ank3	5	5	25	19	22	11	77	20	9	7	4	11	5	10	21	15
Ankdd1b	1	2	3	2	5	0	1	0	1	8	2	2	6	6	10	0
Ankef1	3	2	4	12	3	2	1	0	1	7	2	2	2	2	5	2
Ankfn1	1366	424	1562	2562	1047	932	1467	1615	1304	1437	1540	2187	894	1559	1765	2185
Ankfy1	1567	1181	1710	2443	2145	1298	1779	1788	1330	1237	1619	2392	1465	2177	2476	2125
Ankhd1	1238	702	1268	1984	1334	936	1283	1292	1035	1013	1482	1586	753	1456	1602	1797
Ankib1	1634	1445	1864	2887	1878	1431	1796	1776	1638	1318	1599	1961	1224	1958	2113	2516
Ankle1	132	133	122	289	172	160	139	84	110	189	157	153	109	147	142	200
Ankle2	636	565	811	1070	891	545	913	718	614	786	694	756	706	784	895	930
Ankmy1	4	1	0	1	3	3	4	0	4	4	1	6	4	6	2	4
Ankmy2	596	588	596	904	696	545	519	553	510	594	506	679	642	646	605	842
Ankra2	193	216	219	354	296	194	172	196	215	239	220	205	221	263	220	277
Ankrd1	11	46	24	30	22	14	63	28	8	36	6	12	10	12	38	10
Ankrd10	696	830	758	1363	881	675	936	643	687	687	746	717	527	916	785	1075
Ankrd11	5401	2819	4618	8169	4703	3164	4731	4254	4712	3150	4820	5754	1472	4558	4354	6951
Ankrd12	472	331	546	1075	567	446	572	549	354	479	646	738	269	603	680	783
Ankrd13a	1090	998	1345	1855	1550	911	1850	1419	1147	968	1305	1242	815	1305	1441	1651
Ankrd13b	679	862	875	1332	1295	568	986	689	595	614	896	636	281	837	756	1131
Ankrd13c	1067	1199	1346	2124	1468	1098	1486	1382	1220	1584	1216	1397	1751	1516	1675	1702
Ankrd13d	15	21	3	38	40	22	18	26	32	24	28	25	27	20	23	33
Ankrd16	447	382	442	1078	589	379	429	277	237	466	539	514	265	498	305	602
Ankrd17	2461	1312	2571	3700	2748	1644	2196	2238	2017	1598	2838	3178	1074	2747	2936	3559
Ankrd2	25	70	37	71	78	39	54	58	23	49	14	24	54	70	72	46
Ankrd23	181	135	156	417	228	169	342	204	87	240	252	171	119	229	229	253
Ankrd24	270	237	162	449	346	206	126	122	213	244	278	252	207	211	184	331
Ankrd26	586	409	874	1224	793	566	975	808	699	599	770	869	334	800	885	1041
Ankrd27	779	667	913	1354	1048	647	1062	872	695	827	796	855	673	998	943	1071
Ankrd28	3084	1921	3032	4687	3787	1979	2347	2498	2612	2565	2793	3578	3102	3148	2779	4342
Ankrd29	59	87	128	123	114	128	155	118	102	70	82	130	100	140	143	111
Ankrd33b	12	5	15	15	4	3	75	11	1	11	1	9	10	19	22	10
Ankrd34a	65	50	75	82	65	56	84	100	57	39	57	67	48	53	77	133
Ankrd35	0	0	0	0	2	0	87	0	1	2	0	7	1	13	86	1
Ankrd37	288	387	241	297	364	176	129	116	296	288	254	191	262	193	120	304
Ankrd39	284	344	310	558	358	304	379	323	265	442	326	318	419	415	389	383
Ankrd40	1861	1862	1917	3187	2322	1786	2161	2039	1860	1923	1662	2147	1716	1940	1994	2705
Ankrd42	44	20	38	62	51	31	25	43	45	41	62	67	25	35	46	71
Ankrd44	186	129	189	419	228	288	222	251	286	174	265	338	183	286	314	284
Ankrd46	848	830	838	1484	1260	849	847	866	890	870	739	1024	983	1056	998	1274
Ankrd49	407	388	499	861	492	368	581	491	486	789	449	504	732	726	550	587
Ankrd50	1143	824	1052	1898	1449	897	1244	1103	948	867	1061	1389	665	1196	1338	1667
Ankrd52	2048	1153	2520	3801	2365	1563	2505	2331	1830	1472	2575	2326	605	2222	2486	3373
Ankrd54	501	666	525	805	583	427	697	528	585	770	441	491	597	533	638	699
Ankrd55	4	3	4	10	4	1	6	2	3	11	0	3	6	6	4	9
Ankrd6	43	14	10	43	17	17	13	8	25	27	13	28	21	16	3	26
Ankrd61	5	0	7	9	7	7	1	3	0	3	13	8	0	6	8	3
Ankrd9	102	186	164	200	148	127	227	155	102	133	136	132	144	151	190	196
Anks1	1447	1466	1911	2960	2452	1543	1629	1670	1406	1639	2209	1923	937	1838	2084	2342
Anks1b	2	4	1	9	11	6	1	4	2	6	3	1	3	0	1	8
Anks3	333	387	310	670	409	347	315	285	330	363	344	403	401	360	400	459
Anks6	42	36	16	77	47	39	21	34	42	27	45	40	25	23	26	56
Ankzf1	593	478	493	989	808	572	393	344	573	567	572	599	526	546	502	744
Anln	2336	1719	3002	4048	2681	2090	3656	3358	2526	2551	2394	2666	2731	3065	2962	3025
Ano1	65	29	63	114	65	57	129	57	63	46	84	74	20	53	71	90
Ano10	928	1057	811	1582	1123	742	870	694	953	759	931	1041	699	985	1018	1257
Ano3	798	619	1101	1796	760	933	1563	1339	861	1095	1098	1392	1004	1377	1606	1224
Ano5	1	0	0	2	2	1	9	3	1	6	0	1	2	1	4	1
Ano6	1246	813	1514	2347	1577	1054	2062	1548	1309	1185	1563	1464	766	1524	1795	1823
Ano8	840	928	881	1401	1281	708	753	654	695	498	909	690	384	675	625	1237
Anp32a	3368	4554	4187	6375	5054	3834	3936	3606	4058	3337	3564	3653	3076	3695	3840	4483
Anp32b	8048	10030	9470	14654	10550	9231	10116	8972	10257	8196	6671	8273	7671	9013	9329	9982
Anp32b-ps1	4	1	0	1	0	2	0	0	1	1	3	0	1	2	0	1
Anp32e	5252	5305	6054	9406	6374	5000	6403	5429	5987	5135	4641	5426	4527	5351	5622	6959
Anpep	79	109	151	219	337	165	343	201	58	130	109	277	232	285	385	140
Antxr1	865	632	710	1503	1012	637	1039	747	834	704	857	990	436	671	960	1208
Antxr2	367	381	581	870	557	338	914	575	397	451	504	493	281	543	598	687
Anxa1	1725	2812	2799	4287	4924	2172	4218	3076	2234	3745	2012	2521	3818	4566	3475	2569
Anxa11	899	905	1157	1575	1644	843	1432	1063	892	769	926	1159	941	1324	1270	1336
Anxa11os	2	0	2	2	3	0	4	3	0	0	7	0	1	0	0	2
Anxa2	5982	6765	6834	9457	10330	6152	6985	6576	6037	7417	5974	6612	8817	8358	7568	7399
Anxa3	39	114	47	143	49	68	154	82	24	92	26	50	100	85	85	54
Anxa4	2053	1675	2639	3071	2987	1526	1761	2300	1669	2328	2369	2534	2665	3107	2762	2819
Anxa5	4410	6466	6752	9897	8504	5779	8245	7497	5379	6867	4841	6737	6915	7706	7968	6961
Anxa6	1462	1593	1714	2343	1713	1286	1777	1775	1321	1428	1595	1527	1338	1656	1865	1902
Anxa7	858	963	914	1452	1527	837	1077	733	823	939	731	1202	1635	1385	1357	1133
Anxa8	0	4	1	4	0	1	709	48	0	5	0	16	51	114	586	4
Anxa9	61	75	55	145	127	100	121	70	104	94	100	102	81	89	112	102
Aoah	2	13	14	41	61	37	54	20	12	18	8	35	59	108	94	13
Aoc2	81	70	87	233	96	65	134	56	43	97	102	90	36	97	65	115
Aoc3	72	61	110	168	76	68	112	76	49	67	39	39	10	47	44	105
Aopep	228	276	197	402	274	139	245	164	145	255	128	186	255	254	215	276
Aox1	216	85	124	331	226	139	87	115	91	146	191	223	179	142	193	228
Ap1ar	993	1036	1217	2044	1412	1057	1472	1128	1177	1227	1117	1122	1137	1194	1425	1475
Ap1b1	2299	2235	2411	3723	2955	2183	2280	2191	2277	1800	2205	2950	2020	2429	2926	3056
Ap1g1	2089	1473	2126	3391	2296	1587	2014	2064	2064	1640	2026	2422	1624	2074	2261	2988
Ap1g2	334	323	364	584	508	325	348	317	343	279	372	433	276	380	416	426
Ap1m1	1385	1237	1849	2431	1911	1328	1855	1817	1467	1876	1372	1656	2199	1931	1645	1800
Ap1m2	0	7	5	10	3	8	62	7	4	17	6	6	35	9	38	8
Ap1s1	1558	2643	1921	2901	2485	1721	2556	1985	1953	2494	1577	1681	2406	2466	2045	2251
Ap1s2	710	689	772	1797	909	1029	1101	936	1115	1310	633	1140	1288	1181	1293	1136
Ap1s3	58	73	71	116	116	56	95	79	80	103	94	80	59	86	83	133
Ap2a1	3164	3329	3547	5553	4234	3013	3722	3471	3431	2334	3331	3663	1764	3514	4023	4520
Ap2a2	1431	1289	1624	2509	1756	1413	2007	1653	1495	1200	1471	1566	1063	1559	1999	1935
Ap2b1	4384	3724	5071	7528	5593	3940	4477	4728	4174	3750	4557	5665	3813	5082	5903	6349
Ap2m1	4811	6026	5970	9145	6863	5454	6987	5958	5498	6373	4534	5922	6903	6894	7281	6965
Ap2s1	1655	2852	2201	3078	2669	2279	2561	2085	2068	2912	1795	2163	3105	2531	2600	2448
Ap3b1	2095	1445	2014	3358	2439	1651	1980	1836	2146	1740	1989	2562	2058	2049	2334	2755
Ap3d1	4388	3593	4786	7336	5117	3904	4384	4409	4135	3333	4630	5522	2636	4566	5077	6128
Ap3m1	1933	1857	2298	3040	2578	1674	2369	2120	1950	2001	1990	2032	1815	2112	2235	2682
Ap3m1-ps	1	0	2	3	5	2	1	2	3	2	1	8	1	1	3	2
Ap3m2	290	211	338	488	375	296	238	290	225	314	324	394	434	292	403	348
Ap3s1	629	813	836	1251	1071	793	1041	799	748	1044	634	805	1182	1098	980	964
Ap3s1-ps2	0	1	1	0	2	3	1	1	3	0	0	0	6	0	1	0
Ap3s2	1291	1362	1492	2515	1731	1285	1372	1296	1400	1799	1342	1680	1803	1767	1496	1799
Ap4b1	490	524	536	720	635	454	475	464	455	647	497	583	815	562	527	596
Ap4e1	427	203	421	644	420	258	385	431	314	338	499	463	285	444	477	551
Ap4m1	423	336	386	761	525	387	434	338	354	399	381	426	327	433	392	626
Ap4s1	213	287	229	354	306	321	342	221	287	298	186	276	377	332	315	308
Ap5b1	112	107	127	185	217	110	128	103	130	63	108	163	86	139	200	137
Ap5m1	427	346	428	756	540	400	508	444	414	542	442	514	580	596	521	648
Ap5s1	238	348	289	489	378	304	315	237	283	273	291	309	325	277	318	410
Ap5z1	470	530	489	958	845	544	543	484	485	479	611	675	371	581	622	661
Apaf1	1411	1038	1253	2235	1585	1093	1376	1246	1349	1087	1340	1426	838	1358	1506	2107
Apba1	3	2	11	9	12	12	28	7	8	2	0	17	5	9	20	3
Apba3	843	878	905	1206	913	658	880	835	971	834	641	840	742	787	863	1134
Apbb1	53	63	43	107	65	57	47	48	73	52	45	61	69	25	35	89
Apbb1ip	75	81	92	142	138	81	108	99	85	76	67	158	118	143	208	81
Apbb2	450	356	361	634	500	300	425	356	353	274	346	451	149	354	390	533
Apc	1631	910	1697	2851	1495	1286	2154	1650	1437	1152	1884	2013	524	1705	1702	2551
Apc-ps1	1	0	3	1	1	0	0	1	0	2	4	1	0	1	0	0
Apc2	3	15	6	17	15	4	8	7	4	7	29	11	5	10	14	12
Apcdd1	13	16	6	22	10	9	43	9	8	11	3	4	11	11	19	8
Apeh	926	1002	949	1680	1485	917	840	853	798	893	1074	1227	1223	1217	1258	1253
Apex1	794	1273	1246	1705	1243	1001	1464	1198	1048	1394	847	1030	1328	1265	1304	1176
Apex2	74	125	126	165	104	87	132	120	100	142	99	118	85	128	116	158
Aph1a	2528	3315	3037	4598	3823	2694	3920	2912	2993	2942	2317	3252	2956	3169	3414	3603
Aph1b	223	188	198	398	239	175	372	247	153	290	207	227	221	249	270	328
Aph1c	1575	1995	2017	4764	2599	3121	2948	2116	2267	3536	2116	3521	4549	3620	3555	2432
Api5	2891	2735	3259	4819	3790	2756	3660	3419	3112	3365	2770	3488	4054	3988	3950	4141
Apip	382	537	457	685	444	491	582	439	477	816	335	538	946	711	560	488
Aplf	507	496	528	878	688	399	531	565	547	444	438	525	448	557	549	652
Apln	476	925	445	573	390	215	338	305	208	394	294	395	227	318	191	563
Aplnr	35	70	51	102	59	46	371	142	61	113	32	29	12	39	96	57
Aplp1	11	11	9	24	20	17	22	9	7	9	2	9	7	6	12	9
Aplp2	7515	5913	6798	11833	8497	5302	8750	6951	6108	5923	7147	7545	4300	6187	7104	10331
Apmap	696	740	656	1082	802	624	834	582	675	592	509	703	628	696	701	912
Apoa1	1	0	2	0	2	1	1	1	2	111	0	0	0	0	1	0
Apoa2	7	9	17	23	19	4	14	13	4	96	10	8	11	19	19	10
Apoa5	1	0	2	3	6	6	0	0	1	27	3	8	8	3	6	0
Apobec1	93	122	68	206	175	129	152	91	92	120	48	302	311	267	359	106
Apobec2	12	9	33	40	6	7	38	31	15	27	3	8	23	24	70	9
Apobec3	14	33	47	92	85	98	93	42	16	52	15	131	259	203	299	17
Apobr	70	83	25	95	91	64	47	14	21	33	9	85	51	72	79	76
Apoc1	0	4	0	0	4	0	38	1	2	31	0	0	11	7	37	0
Apoc2	0	4	6	4	15	4	21	1	4	22	2	4	21	14	8	1
Apod	23	23	60	64	147	37	78	57	2	50	38	43	36	86	88	30
Apoe	12084	16765	14374	24143	20199	16330	18478	14332	14678	18389	11898	17804	26753	20493	19701	17500
Apol10b	3	0	6	9	12	29	4	3	1	3	0	96	99	79	87	4
Apol11b	1	0	103	0	7	0	3	6	1	3	15	0	0	11	1	0
Apol6	4	7	24	26	77	120	13	11	1	12	1	224	271	311	316	1
Apol7d	8	3	1	8	2	2	3	1	1	1	3	2	3	6	2	6
Apol7e	0	0	4	5	1	1	0	5	0	0	0	11	11	9	14	3
Apol8	0	0	1	5	0	5	2	1	0	1	1	2	0	6	3	4
Apol9a	1	27	122	108	375	223	24	79	11	74	2	1013	1812	1028	1235	17
Apol9b	6	40	133	133	381	292	39	63	8	78	6	1078	1959	1152	1271	15
Apold1	5326	3665	5157	5932	6078	3149	3103	3806	4367	3406	4165	4853	5604	4200	3699	6279
Apom	1	0	4	5	2	6	6	5	2	1	0	7	3	3	4	2
Apon	0	0	7	1	0	4	5	1	9	9	1	7	3	0	3	8
Apoo	463	581	538	849	653	552	578	570	507	583	464	613	892	780	674	712
Apoo-ps	7	2	3	0	3	1	3	0	2	1	4	2	2	2	1	3
Apool	137	194	146	253	237	163	184	172	197	222	164	166	259	239	189	171
Apopt1	882	1108	936	1638	1041	1030	964	873	1155	1662	674	1151	1751	1232	1088	1130
App	5569	4540	5864	9207	7737	4813	6922	5746	5415	4503	5184	7513	5393	6886	7699	8120
Appbp2	2495	1791	2505	3906	2420	2136	2588	2515	2430	1995	2281	2716	2378	2752	2961	3429
Appbp2os	6	5	3	6	3	2	4	2	0	2	2	10	2	6	1	8
Appl1	701	497	630	984	794	503	701	625	624	534	648	765	609	720	710	876
Appl2	4021	2471	3080	6615	4463	2562	1997	2433	2818	3421	4275	3692	2164	3179	2687	5194
Aprt	1127	1998	1689	2131	1911	1190	2075	1472	1223	2018	1046	1277	1995	2165	1552	1578
Aptx	389	436	388	681	539	341	383	344	370	382	362	451	491	516	383	494
Aqp1	677	696	689	805	560	414	685	485	625	575	501	440	331	516	511	929
Aqp11	51	42	37	63	69	36	57	31	25	36	41	50	56	54	36	64
Aqp3	0	4	3	0	0	0	1346	90	0	4	0	7	22	137	427	4
Aqp4	29	13	18	27	24	46	26	26	47	25	18	9	15	23	32	35
Aqp5	0	11	9	4	2	6	3	2	0	2	5	6	11	11	9	7
Aqp6	1	2	2	4	0	1	1	1	0	0	0	2	0	2	0	2
Aqp7	0	2	1	6	7	0	6	1	4	0	2	5	4	2	7	3
Aqp8	0	3	0	0	0	9	1	0	6	3	1	3	1	2	1	0
Aqp9	0	3	0	1	3	2	61	2	0	12	0	0	1	4	25	1
Aqr	1737	1237	1903	2810	2226	1312	1682	1725	1577	1188	1838	2191	964	1833	2237	2367
Ar	0	0	0	5	1	2	10	0	4	1	2	1	1	1	18	2
Araf	1249	1306	1246	2134	1543	1109	1286	1071	1151	1251	1263	1504	1506	1568	1476	1838
Arap1	721	890	810	1360	1161	824	693	701	705	575	855	1083	504	949	1266	1251
Arap2	874	537	692	1374	849	612	643	804	594	519	740	1025	473	896	826	1289
Arap3	102	153	139	210	189	103	222	110	125	113	119	145	54	122	120	150
Arc	3	1	1	3	2	2	22	0	0	1	3	2	1	3	6	7
Arcn1	4865	3689	4838	7323	5311	3566	5411	5279	4560	4344	4478	5344	4915	5349	5362	6412
Areg	0	2	0	1	1	0	43	3	0	0	1	4	1	5	1	0
Arel1	1274	820	1308	2066	1710	943	1352	1191	1100	1091	1243	1625	1085	1501	1510	1810
Arf1	8825	10177	9813	14220	11424	8472	11144	9857	9052	10151	7651	9620	12647	11507	11067	11795
Arf2	715	770	719	1120	745	712	861	743	621	814	541	736	1164	956	949	864
Arf3	4078	3543	3911	6257	5479	3376	3474	3468	3645	2855	3566	4553	2809	4209	5037	5691
Arf4	4198	4963	4478	7050	5319	4279	5466	4749	4164	5302	3525	5457	7080	6773	5957	5591
Arf5	2578	4327	2943	4177	3753	3047	3092	2644	3112	4384	2264	2720	4747	3718	3188	3321
Arf6	2378	2400	2721	3767	2878	2075	2333	2358	2538	2407	1807	2604	2946	2795	3163	3279
Arfgap1	974	973	966	1620	1173	805	916	838	798	867	856	1013	823	959	971	1255
Arfgap2	1460	1500	1599	2629	1981	1482	1817	1485	1498	1686	1394	1772	2115	2018	1814	2033
Arfgap3	426	447	359	552	443	251	385	348	342	341	369	429	392	428	446	461
Arfgef1	1993	1551	2245	3491	2655	1769	2209	2034	2015	1731	2131	2452	1487	2407	2721	3073
Arfgef2	1416	943	1400	2444	1892	1099	1720	1424	1141	964	1871	1920	678	1739	1722	1984
Arfgef3	1987	717	1352	2191	1605	1505	1029	1185	1027	805	1840	2142	938	1686	1505	2778
Arfip1	2063	2031	1868	2840	2328	1632	1846	1759	1869	1722	1814	2025	1808	2056	1878	2575
Arfip2	1409	1247	1298	2057	1463	896	1332	1158	1143	1392	1054	1363	1357	1441	1247	1720
Arfrp1	449	526	523	890	578	501	572	425	471	659	428	544	663	670	550	589
Arg1	58	199	149	158	520	260	793	124	83	152	26	396	836	288	250	79
Arg2	2	1	9	5	7	6	48	2	0	5	5	4	18	1	4	3
Arglu1	1332	1360	1336	3047	1704	1352	1348	1025	1119	1405	1239	1609	989	1651	1132	1763
Arhgap1	1346	1433	1593	2558	1993	1309	1627	1562	1486	1304	1377	1721	1001	1636	1922	2001
Arhgap10	649	610	754	1216	823	811	899	736	857	663	582	913	709	878	1122	845
Arhgap11a	1416	952	1367	2413	1315	974	1504	1362	1205	919	1156	1279	418	1201	1219	1821
Arhgap12	597	459	475	967	655	524	523	475	517	552	689	684	612	627	613	822
Arhgap15	1	1	2	5	28	14	11	9	4	12	1	22	70	47	49	3
Arhgap17	482	398	593	891	605	508	509	477	437	417	562	715	403	591	724	722
Arhgap18	765	530	580	1066	727	521	803	700	624	641	543	667	628	717	674	844
Arhgap19	1086	862	1058	1918	1078	911	1212	1160	962	934	801	1031	771	936	1048	1359
Arhgap20	45	13	66	101	35	57	99	75	53	50	79	79	26	88	67	77
Arhgap20os	2	1	0	1	2	4	7	3	0	3	0	4	2	1	5	0
Arhgap21	1709	1089	1652	2915	1650	1083	2103	1973	1406	1268	1662	1968	730	1731	2076	2616
Arhgap22	4	6	7	25	20	13	20	5	0	4	7	14	40	20	42	11
Arhgap23	786	678	795	1255	1034	565	994	825	674	466	779	895	285	732	833	1121
Arhgap24	5	2	10	19	9	7	38	17	0	9	3	21	21	17	28	6
Arhgap25	18	30	35	36	59	31	45	36	21	29	18	69	59	74	98	40
Arhgap26	131	102	127	190	170	140	151	138	116	127	164	160	111	162	200	182
Arhgap27	345	291	343	633	589	296	422	360	319	356	385	428	205	415	414	573
Arhgap27os1	4	3	6	6	2	2	3	8	3	1	4	0	0	4	2	4
Arhgap27os2	0	4	0	6	0	1	5	0	1	0	1	0	2	4	5	0
Arhgap27os3	1	0	0	4	0	2	3	0	0	1	3	0	0	6	5	1
Arhgap28	43	32	45	50	63	24	73	43	33	34	39	40	13	59	43	76
Arhgap29	441	303	489	896	586	409	762	591	405	524	492	653	652	727	680	542
Arhgap30	2920	2106	3017	4938	3716	2331	2168	2541	2515	2079	2917	3929	2552	3230	3309	3965
Arhgap31	1128	804	1519	2441	1500	1040	1769	1717	1087	1102	1554	1814	576	1656	1785	1849
Arhgap32	622	453	672	1364	751	628	872	818	595	540	901	885	245	842	698	1055
Arhgap33	70	32	33	77	39	32	24	27	38	29	44	30	5	9	23	92
Arhgap35	2256	1560	2367	3772	2388	1559	2678	2442	2022	1619	2414	2488	1023	2146	2557	3646
Arhgap39	1274	1176	1375	2245	1559	946	1442	1262	1211	1115	1382	1414	735	1300	1354	1874
Arhgap4	7	10	21	47	19	35	20	16	3	21	9	31	49	62	88	15
Arhgap42	194	175	182	338	223	169	238	205	204	188	237	269	179	221	229	273
Arhgap44	1	0	0	6	12	1	10	6	1	2	1	1	0	3	3	2
Arhgap45	69	92	69	165	196	121	147	81	72	107	74	136	126	158	233	125
Arhgap5	1885	1096	1458	2432	1694	1220	1651	1490	1624	1407	1620	1850	1687	1760	1758	2247
Arhgap6	148	105	125	227	176	92	152	172	126	141	104	156	150	163	220	161
Arhgap9	380	513	429	724	637	499	506	324	524	604	331	535	757	570	638	509
Arhgdia	16758	19557	21774	30343	23137	17098	23142	21279	19310	17453	16032	19288	16385	20381	22579	22476
Arhgdib	4423	6781	6537	9504	7834	5619	7423	6124	5964	8991	4547	7190	10232	8771	8286	6418
Arhgdig	43	61	46	58	85	48	30	30	54	25	18	22	30	31	28	40
Arhgef1	2104	2218	2190	4138	3090	2241	2216	1870	2123	1722	2392	2255	1428	2246	2342	2997
Arhgef10	504	366	445	769	531	373	477	449	417	335	459	637	299	463	486	655
Arhgef10l	899	1029	702	1511	1268	710	755	834	784	537	1031	1039	486	789	714	1420
Arhgef11	2954	1915	3024	5358	3661	2278	2308	2781	2545	2203	3461	4104	1611	3096	3384	4704
Arhgef12	4097	2381	4242	7009	4735	3113	3966	4219	3523	3003	4770	5131	2063	4595	5122	6378
Arhgef15	43	39	47	64	50	34	120	61	44	53	35	41	23	43	45	63
Arhgef16	7	7	8	14	4	22	46	9	6	9	8	8	27	7	34	9
Arhgef17	424	385	358	849	512	221	554	458	339	275	359	369	130	358	387	677
Arhgef18	760	495	624	1077	970	564	634	655	677	475	727	877	478	666	849	994
Arhgef19	42	56	37	74	63	16	86	32	26	23	49	42	11	30	50	73
Arhgef2	4193	3062	3122	6336	4418	2695	3461	3125	3740	2996	3192	4194	2261	3461	3961	5488
Arhgef25	426	419	313	780	563	377	324	241	386	392	372	354	276	351	313	494
Arhgef26	9	1	9	16	4	7	10	6	4	4	4	4	7	8	8	10
Arhgef28	20	39	18	45	24	9	41	16	23	27	22	19	12	13	21	44
Arhgef3	24	34	33	41	54	40	91	42	23	37	28	45	59	65	113	37
Arhgef37	202	97	218	448	259	203	137	229	151	192	287	526	293	284	356	351
Arhgef39	255	313	251	525	310	272	395	329	268	329	241	238	262	281	259	312
Arhgef4	117	77	101	178	129	60	178	73	106	113	82	89	80	133	137	143
Arhgef40	487	501	499	973	672	406	557	541	541	427	650	465	216	390	467	742
Arhgef5	83	52	69	100	111	58	212	78	83	67	47	52	82	95	128	102
Arhgef6	17	14	31	41	44	29	48	31	9	21	10	56	61	58	89	20
Arhgef7	1325	1085	1457	2160	1856	1043	1427	1274	1231	1007	1410	1432	918	1424	1382	1899
Arhgef9	71	70	53	67	83	63	40	48	55	32	53	95	39	58	33	110
Arid1a	2736	1448	2598	4273	2548	1803	2269	2051	2118	1742	2839	2610	602	2254	2544	3822
Arid1b	1272	806	1408	2649	1924	1139	1514	1379	1311	968	1174	2131	734	1680	1961	1841
Arid2	2830	1506	2432	4040	2695	1535	2077	2107	2213	1683	2576	2262	910	2161	2124	3661
Arid3a	155	142	114	234	229	136	187	104	130	111	139	177	94	147	163	233
Arid3b	65	39	48	129	53	81	35	54	44	49	77	68	36	68	67	101
Arid3c	6	4	2	2	8	3	20	1	0	3	8	2	0	7	2	1
Arid4a	599	436	534	904	518	495	450	491	464	391	617	735	349	566	657	864
Arid4b	504	403	492	884	569	458	399	427	421	479	550	599	370	510	546	743
Arid5a	1034	719	465	1168	1165	634	429	392	876	512	382	1012	832	623	638	1166
Arid5b	530	353	373	718	569	333	469	379	439	222	321	424	172	404	460	644
Arih1	2340	1982	2599	3700	2941	2025	2519	2508	2317	2307	2458	2827	2829	3035	3183	3412
Arih2	1468	1107	1315	2027	1441	1001	1235	1304	1234	1238	1247	1425	1351	1388	1442	1706
Arl1	2267	2526	2504	3673	2739	2096	2892	2640	2413	4346	1945	2816	4654	3927	2677	2819
Arl10	244	227	350	496	267	249	428	325	296	371	284	335	475	385	390	415
Arl11	347	382	258	594	418	376	282	332	388	556	301	447	627	461	410	449
Arl13b	354	210	250	420	262	174	221	271	281	325	267	319	375	293	308	413
Arl14ep	905	763	464	1258	679	624	629	504	780	595	504	817	629	671	631	920
Arl15	303	277	298	585	390	234	378	276	315	340	231	276	259	301	328	399
Arl16	101	144	163	247	196	114	212	156	143	232	161	169	177	176	191	199
Arl2	805	1090	942	1510	1116	1056	840	847	952	1326	664	1138	1893	1302	1126	1072
Arl2bp	2220	2663	2345	3660	2829	2025	3063	2334	2378	2292	2049	2046	2555	2319	2063	2960
Arl3	533	1016	708	1240	710	774	640	685	764	948	591	714	985	838	667	885
Arl4a	96	117	137	173	179	141	199	123	133	190	68	188	244	198	219	131
Arl4c	15	35	41	75	95	41	190	64	15	84	19	79	88	103	159	55
Arl4d	21	9	23	27	31	11	86	20	19	25	7	36	21	22	38	15
Arl5a	1498	1492	1869	2689	2382	1316	2103	1867	1532	1776	1499	1805	2200	2218	1904	2322
Arl5b	939	618	799	1346	755	663	823	767	805	763	848	1056	718	811	920	1359
Arl5c	2	10	4	8	17	8	5	5	1	10	2	12	27	11	9	7
Arl6	313	315	339	494	385	269	347	331	354	523	263	331	533	480	402	398
Arl6ip1	4433	4619	4833	7902	5486	4503	6623	4603	4918	5717	3542	5081	6400	5340	5463	6324
Arl6ip4	839	1152	985	1516	1189	924	1103	952	997	1179	694	1037	1473	1212	1065	1101
Arl6ip5	998	1225	1158	1856	1430	1028	1541	1331	995	1684	846	1439	2148	1664	1775	1267
Arl6ip6	833	889	781	1381	1060	765	1002	822	884	966	730	830	996	1011	865	1155
Arl8a	1077	1262	1164	2130	1597	1054	1144	1101	1014	915	977	1312	1043	1284	1436	1668
Arl8b	2985	2958	3657	5074	4005	3023	4546	3866	3165	4101	3147	3463	3823	4243	4102	4219
Arl9	3	1	0	4	2	1	2	4	4	2	3	0	1	4	2	2
Armc1	1066	1102	1374	1968	1444	1046	1746	1492	1318	1755	1179	1510	2080	1927	1667	1574
Armc10	761	715	793	1285	1009	651	915	821	717	910	671	810	1090	904	796	1005
Armc2	54	66	79	151	129	66	117	83	68	95	91	86	75	81	82	85
Armc3	0	1	0	2	2	3	0	0	0	0	1	6	20	2	6	0
Armc5	632	653	595	1147	859	639	572	564	715	471	487	626	428	652	673	874
Armc6	198	261	265	327	261	241	313	279	233	329	215	208	459	297	373	312
Armc7	99	90	127	168	138	112	135	80	84	126	103	151	166	102	144	164
Armc8	683	667	704	1005	714	641	716	748	632	689	647	779	814	863	755	911
Armc9	189	185	216	385	291	201	223	175	206	238	260	268	313	248	298	261
Armcx1	308	324	240	458	407	232	241	177	238	187	221	259	199	236	228	451
Armcx2	1061	1017	915	1602	1052	880	992	989	1116	865	845	1104	1327	1058	1042	1364
Armcx3	336	302	312	457	312	320	349	295	289	292	240	311	298	288	335	458
Armcx4	269	174	229	311	215	90	353	193	255	86	189	152	16	126	121	323
Armcx5	101	89	83	201	156	78	117	91	103	129	83	116	86	98	100	143
Armcx6	5	4	4	7	3	7	17	4	4	9	4	1	7	5	8	15
Armh3	297	344	311	533	403	318	407	326	363	333	321	439	317	375	442	374
Armh4	0	6	3	4	7	8	19	5	10	12	2	7	6	4	9	4
Armt1	486	433	494	846	652	411	591	462	492	705	472	525	638	650	533	662
Arnt	1379	935	1298	2241	1646	1013	1162	1202	1222	1101	1292	1690	1080	1362	1541	1807
Arnt2	19	4	8	16	13	13	10	8	15	8	20	10	1	10	9	14
Arntl	277	205	195	377	233	153	162	196	204	161	227	238	144	241	216	388
Arntl2	40	45	43	73	75	41	57	41	28	52	51	42	30	74	46	65
Arpc1a	1874	2436	2129	3417	2702	1865	2516	2158	1892	2588	1780	2033	2793	2483	2150	2695
Arpc1b	4135	4933	4924	7213	6636	3710	5692	4566	4228	5137	3912	4822	6511	5771	5930	6340
Arpc2	4714	5143	5501	7473	6812	4390	5503	5096	5424	5189	4271	5684	6373	6134	6242	6358
Arpc3	3261	4580	4278	6204	4986	4202	4325	4053	4042	6409	3275	5086	8053	5849	4961	4510
Arpc4	2915	4594	4134	5871	4609	3549	3863	3873	3525	4825	2656	3923	6539	5153	4374	4161
Arpc5	3792	4681	4494	7252	5978	4298	4457	4082	4141	5702	3646	5182	7435	6592	5095	5376
Arpc5l	1230	1780	1377	2275	1643	1313	1490	1241	1444	2102	1009	1394	2069	1934	1528	1621
Arpin	561	553	671	1071	789	535	730	694	608	757	493	651	835	808	708	736
Arpp19	1668	2484	2204	3443	2628	1942	1822	1820	1846	2526	1748	2164	3004	2343	2111	2661
Arpp21	1	1	3	2	11	0	2	3	0	0	2	1	3	0	4	1
Arrb1	401	297	462	597	523	213	492	430	295	255	468	386	95	397	441	573
Arrb2	239	344	271	526	465	309	445	349	343	348	206	364	449	444	532	291
Arrdc1	194	208	154	363	361	195	140	154	172	255	159	210	225	243	215	235
Arrdc2	165	177	154	219	215	113	104	106	175	108	115	145	78	135	151	224
Arrdc3	1558	849	1476	1478	2400	757	829	965	1140	839	1268	986	966	1062	679	1377
Arrdc4	4	10	14	29	22	27	111	10	0	21	0	17	20	34	48	6
Arsa	1313	1212	1223	2272	1827	1327	1365	1140	1300	999	1202	1668	979	1203	1602	1779
Arsb	1281	656	1420	2127	1498	984	1968	1739	1270	1092	1227	1647	991	1627	1662	1694
Arsg	749	629	795	1236	695	711	713	642	635	631	757	807	805	792	825	1087
Arsi	2	10	0	10	1	16	34	4	1	4	0	2	0	6	18	2
Arsk	112	118	136	237	174	121	229	154	149	224	125	131	177	185	194	188
Art1	6	8	8	16	25	22	26	28	6	15	19	19	30	31	36	16
Art3	145	151	261	287	229	100	629	232	105	285	163	139	105	193	186	156
Art4	8	3	11	13	5	2	19	7	11	9	2	7	1	2	9	6
Art5	428	538	510	1117	584	1128	565	414	819	967	425	846	1119	677	925	575
Artn	5	14	3	21	7	9	13	11	8	5	10	14	9	3	7	15
Arv1	104	91	108	154	88	100	116	78	90	73	61	127	94	134	92	102
Arvcf	217	163	117	271	204	103	96	140	108	87	152	130	82	98	146	210
Arxes1	23	25	17	18	6	15	20	16	16	18	22	8	17	13	14	18
Arxes2	2	1	2	9	3	0	8	6	3	0	0	0	8	2	0	0
As3mt	6	6	20	14	21	13	33	16	22	14	6	20	17	21	34	10
Asah1	2034	1945	2260	3621	2756	1985	3143	2525	2013	2815	2071	2708	3650	3150	2868	2988
Asah2	270	138	264	515	361	241	219	247	228	214	316	534	251	315	439	376
Asap1	1610	1073	1656	2783	2074	1209	1687	1562	1476	1218	1531	1757	654	1455	1737	2336
Asap2	571	401	508	833	602	380	494	479	508	382	552	494	192	463	522	861
Asap3	15	3	9	17	8	12	11	15	1	9	3	8	12	9	27	8
Asb1	606	479	624	914	717	510	596	503	540	523	656	636	492	573	657	879
Asb10	44	26	27	68	61	16	20	13	44	72	35	56	44	45	33	59
Asb13	110	110	145	194	216	99	160	111	89	106	111	183	176	226	192	200
Asb2	201	338	358	743	460	479	203	302	364	383	542	550	394	346	622	493
Asb3	198	211	189	380	260	179	243	184	193	165	196	206	252	214	201	298
Asb4	6	2	5	7	2	1	4	4	3	11	4	6	8	2	6	11
Asb5	5	11	5	8	3	0	8	6	0	22	2	4	3	4	9	9
Asb6	506	537	606	835	600	472	750	579	525	583	421	498	449	622	690	688
Asb7	411	330	366	677	487	380	400	359	431	336	396	451	326	403	388	608
Asb8	639	761	698	1060	880	626	793	679	670	635	625	659	631	670	749	891
Ascc1	475	624	416	784	680	482	413	414	558	654	468	490	702	574	529	626
Ascc2	1636	1431	2022	3125	2171	1586	1870	1639	1574	1589	1824	1963	1275	1844	1905	2325
Ascc3	838	672	915	1319	1126	672	963	876	681	555	1045	1262	588	1071	1122	1190
Ascl2	0	0	1	7	4	0	5	3	4	0	1	0	1	0	5	1
Asf1a	588	689	515	918	741	559	722	568	680	745	358	664	1004	845	697	772
Asf1b	566	669	773	1045	806	584	960	827	676	812	528	618	857	945	918	851
Ash1l	1969	1040	2071	3357	2043	1239	1998	1787	1539	1424	2707	2210	574	1862	1896	2987
Ash2l	2203	2240	2500	3658	2818	2139	2459	2496	2447	2179	1960	2452	2822	2928	2526	2965
Asic1	272	216	194	493	402	179	139	121	224	167	226	269	133	205	174	387
Asic3	4	6	1	11	2	0	3	2	0	3	9	6	0	3	6	3
Asic4	1	1	0	9	2	2	3	0	8	3	6	2	0	1	0	14
Asl	908	1127	1087	1683	1415	1062	960	974	1016	1133	905	1388	1967	1407	1540	1295
Asna1	2261	2444	2832	3940	2733	2258	2645	2689	2322	3966	1976	2451	4408	3351	2896	2826
Asns	4481	4491	2088	4973	3914	2756	2082	1963	4354	3766	1582	3759	3782	3045	2868	4499
Asnsd1	1560	1751	1998	2646	2241	1729	2303	1923	1791	2183	1499	1823	2180	2301	2021	2127
Aspa	4	6	0	18	6	10	4	2	1	11	5	26	34	20	14	3
Aspdh	4	0	0	4	3	0	0	1	0	1	2	1	0	1	0	1
Aspg	115	142	114	219	166	92	175	101	86	85	115	105	93	139	93	148
Asph	2013	1586	1996	2943	2008	1331	2095	1862	1707	1722	1869	1898	1536	1912	1761	2683
Asphd1	0	0	2	2	2	1	1	2	0	0	1	5	0	0	0	3
Asphd2	10	28	20	38	18	30	35	13	27	36	20	6	9	22	24	24
Aspm	1195	723	1299	2246	1218	930	1938	1437	1063	1040	1255	1289	445	1147	1282	1601
Aspn	32	38	37	117	44	72	261	108	78	137	28	25	52	51	96	70
Asprv1	1	17	13	2	8	2	1674	22	0	11	3	12	68	152	898	21
Aspscr1	1215	1567	1201	2193	1614	1337	1206	1106	1547	1513	986	1450	1407	1325	1565	1511
Asrgl1	344	335	310	499	366	291	326	291	298	299	252	331	298	323	300	388
Ass1	339	346	247	559	538	200	619	393	243	461	321	468	660	443	421	431
Aste1	150	124	179	250	146	148	258	190	154	211	159	192	179	237	213	219
Astl	7	8	9	18	4	11	10	3	12	3	8	17	16	8	6	12
Astn2	0	1	0	3	0	1	2	4	0	0	0	2	0	1	1	1
Asxl1	2085	1315	2004	3761	2255	1656	2227	2079	1983	1458	1978	2340	882	2109	1961	2667
Asxl2	1314	661	1387	2316	1435	903	1262	1160	941	1114	1689	1663	745	1572	1451	2103
Atad1	1580	1676	1768	3020	2206	1645	2559	1904	1805	1442	1530	1771	1565	1976	2054	2174
Atad2	2957	2195	3322	5836	3508	2634	3814	3568	3259	3009	2959	3596	2641	3764	3973	4011
Atad2b	1187	678	1120	1550	1052	659	947	953	932	811	1193	1026	536	966	1057	1497
Atad3a	1220	1418	1612	2359	1780	1405	1770	1534	1435	1450	1352	1629	1906	1970	1916	1745
Atad3aos	4	5	12	11	1	0	2	6	7	10	2	6	10	6	2	6
Atad5	755	496	778	1319	853	551	905	731	751	704	850	817	500	832	757	1101
Atat1	200	204	246	389	246	139	234	226	129	237	203	239	233	188	163	275
Atcay	2	4	3	8	2	4	2	3	1	2	4	6	2	2	3	6
Ate1	1089	994	1246	1851	1370	1096	1145	1233	1098	975	1104	1418	1364	1477	1463	1585
Atf1	1078	1057	1204	1718	1299	1021	1214	1048	1081	967	982	1116	1033	1164	1191	1326
Atf1-ps	1	2	0	2	0	1	1	1	3	2	0	0	1	2	0	1
Atf2	1313	1034	1043	1848	1263	961	983	922	1199	944	1061	1261	771	1115	1105	1738
Atf3	679	330	338	603	430	368	271	220	420	316	201	491	645	563	584	435
Atf4	9434	9637	4751	12508	5450	7385	6113	5453	9772	7137	4011	8923	9966	6700	6337	9612
Atf5	1686	2245	520	1797	1741	943	481	505	931	949	592	1624	993	1042	1007	2269
Atf6	2698	1686	1597	3987	2161	2224	1683	1814	2372	1847	1847	3498	2228	2130	2530	3258
Atf6b	1578	1826	2023	3020	2153	1561	2704	2014	1782	1778	1774	1868	1665	2016	2319	2227
Atf7	1415	704	1305	2055	1424	859	1100	1273	1046	918	1266	1593	445	1396	1432	2086
Atf7ip	1519	1005	1481	2721	1551	1318	1744	1510	1280	1061	1412	1850	660	1639	1723	2045
Atg10	102	112	97	163	131	128	104	131	115	120	93	154	183	164	116	125
Atg101	430	592	494	752	650	458	585	473	526	721	353	411	722	542	597	629
Atg12	415	471	454	716	524	431	507	454	461	592	416	657	903	740	609	605
Atg13	859	793	667	1329	1093	611	663	689	781	708	605	929	627	792	847	1044
Atg14	166	108	143	287	202	113	168	175	158	220	158	195	256	216	205	216
Atg16l1	552	682	684	1013	823	584	537	522	550	738	727	759	712	693	730	796
Atg16l2	99	158	140	251	196	122	142	116	113	134	126	151	113	168	203	166
Atg2a	512	414	511	834	789	378	527	470	397	400	621	597	187	456	613	734
Atg2b	1480	910	1462	2309	1752	1108	1356	1293	1253	986	1805	1604	592	1433	1676	2106
Atg3	1003	1080	1033	1761	1208	1077	1315	1216	1098	1322	846	1257	1425	1386	1345	1424
Atg4a	356	392	579	737	525	438	764	560	459	772	437	541	799	860	502	560
Atg4a-ps	1	4	0	2	0	4	1	0	6	2	3	2	0	2	0	4
Atg4b	690	896	913	1318	1196	888	1011	822	803	969	857	1019	1119	1023	1074	994
Atg4c	234	293	345	468	402	274	263	281	347	274	340	308	280	330	330	417
Atg4d	437	567	538	737	620	446	711	584	441	698	377	493	832	761	566	552
Atg5	423	490	546	852	617	474	785	616	536	918	400	578	983	863	653	593
Atg7	686	742	722	1256	812	704	667	708	854	640	635	827	699	779	845	918
Atg9a	2154	1744	1804	2781	2373	1374	1587	1559	1814	1291	2050	1631	753	1328	1504	2827
Atg9b	10	10	13	14	10	6	17	13	9	9	6	15	13	12	11	14
Atic	2662	3028	3580	5088	3882	3095	3894	3468	3125	2656	2593	3206	3151	3604	3861	3517
Atl1	637	584	495	1092	740	563	474	417	598	595	589	617	462	518	456	764
Atl2	977	863	1006	1624	1134	855	1263	993	963	1078	815	1057	1170	1132	1025	1334
Atl3	1403	926	1468	2488	2116	1250	1504	1334	1278	1300	1437	1730	1389	1734	1654	2130
Atm	712	313	1066	1505	1105	528	925	947	645	728	1186	1081	541	1216	1182	1247
Atmin	955	675	922	1433	1064	805	936	825	959	553	866	1185	487	922	947	1285
Atn1	3672	2873	3792	6306	4507	2916	3280	3382	3392	2496	3317	4181	1334	3366	4130	5222
Atoh8	1	3	6	12	8	6	14	8	3	4	1	1	4	10	4	1
Atox1	677	1233	1015	1554	1188	886	1175	779	718	1420	674	1073	1684	1360	1019	1101
Atp10a	5	8	16	38	16	7	35	26	3	17	5	21	17	24	48	15
Atp10b	15	1	10	12	7	5	42	18	1	15	11	5	0	8	20	21
Atp10d	37	28	78	74	48	48	83	72	46	44	60	67	22	72	76	72
Atp11a	4054	2773	5075	8801	4543	4491	7123	5222	3681	3692	5215	6858	2675	6364	6691	6357
Atp11b	1459	1081	1525	2412	1887	1104	1869	1481	1575	1266	1527	1715	1129	1565	1575	2318
Atp11c	560	318	576	933	599	461	833	542	538	437	519	672	286	527	551	755
Atp13a1	1725	1789	2240	3083	2315	1858	2686	2012	1987	1405	1955	2224	1291	2135	2448	2491
Atp13a2	8026	7372	9407	15498	10325	7424	13490	9389	8513	6978	8502	10182	4616	9415	11306	11498
Atp13a3	4312	2558	4361	6525	4585	2748	5434	4384	3613	3333	4173	4152	2660	4218	4165	5963
Atp1a1	65273	61758	58716	98578	79090	51619	63507	53730	66214	44514	57970	71116	39971	53028	66539	88717
Atp1a2	16	30	31	55	94	32	146	65	8	30	8	35	21	47	101	34
Atp1a3	51	55	68	134	193	138	99	86	34	58	76	139	98	164	185	98
Atp1b1	10	6	9	39	30	24	53	26	3	13	4	18	10	8	27	6
Atp1b2	113	68	59	157	120	60	69	32	54	38	80	95	26	45	77	143
Atp1b3	2934	3505	3628	6270	4683	3912	5052	3706	3537	3870	2993	4360	5199	4667	4721	4135
Atp23	79	102	96	113	123	106	139	96	82	114	53	76	150	133	118	87
Atp2a1	93	171	132	90	178	52	615	256	50	182	15	101	256	221	753	245
Atp2a2	10258	7458	11151	16879	12028	8555	14923	11170	9722	7174	10369	11890	6531	12307	12423	14125
Atp2a3	41	34	38	33	36	21	42	19	33	12	11	33	10	29	45	40
Atp2b1	1321	764	1426	2227	1506	1096	2103	1580	1212	960	1294	1414	575	1554	1607	1851
Atp2b2	0	0	4	6	11	9	9	2	5	0	0	2	1	2	1	0
Atp2b4	106	46	69	118	89	59	231	97	79	56	90	58	28	73	144	122
Atp2c1	1085	833	1230	1833	1249	1007	1857	1224	1223	1182	1163	1252	1034	1273	1339	1496
Atp5a1	17344	18660	20100	29377	22764	17799	22061	20406	18886	18303	16384	19260	25472	22198	21832	23776
Atp5b	29278	30738	31160	48133	37820	29214	35365	32752	32003	35799	25496	33903	47790	38772	36799	38836
Atp5c1	5526	7099	7223	9895	7146	6273	7786	7082	6081	9908	5133	7964	12820	10252	7228	7616
Atp5d	4294	6423	5312	8210	5875	5210	5560	5260	4816	6072	4127	5153	6630	5763	5678	6118
Atp5e	1638	4159	2916	4443	2833	3080	2259	2222	1871	5368	1328	3240	6121	4961	2944	2720
Atp5g1	2338	3607	2996	4233	3248	2633	3784	2954	2271	3362	2048	2417	3564	3796	3205	3248
Atp5g2	5030	7026	5382	9483	6829	5780	5863	5445	5808	7860	4249	6707	8886	7049	6057	6821
Atp5g3	6370	9658	7900	11793	9448	7281	8118	7027	6583	8624	5403	7405	11748	10243	8012	9464
Atp5h	2216	3991	3180	4966	3731	3378	3619	3231	2577	5552	2326	3445	5570	5287	3542	3319
Atp5j	2619	3805	3088	4810	3646	3035	3232	2841	2881	3969	2431	3191	5103	4213	3491	3979
Atp5j2	2071	3671	3093	4322	3155	3109	3778	2914	2899	4943	2191	3031	5204	4665	3104	3107
Atp5k	381	650	575	875	461	507	425	439	291	600	362	503	1001	545	442	624
Atp5l	1997	3881	2774	4547	3477	3188	3381	2675	2220	5624	1914	3207	5548	4682	2943	2939
Atp5md	775	1549	1523	2312	1174	1351	1366	1367	746	3138	752	1604	2890	2293	1122	1146
Atp5mpl	1963	3762	2851	4364	2925	3023	2873	2559	2204	3477	2297	2950	4251	3557	2168	3307
Atp5o	4368	6941	6037	8777	6748	6079	7764	6327	5410	8334	4523	6331	10473	9216	6493	6068
Atp5pb	4793	6994	5838	8665	6954	5868	7930	6454	5556	8437	4493	6355	10065	8831	6647	6592
Atp5pb-ps	6	4	9	13	4	4	3	2	12	10	4	7	9	7	6	7
Atp6ap1	3100	3516	3875	5665	4259	3071	4716	3807	3390	4004	3495	3853	4433	4183	4327	4534
Atp6ap2	2088	2263	1858	3284	2484	2051	2509	2094	2004	2113	1686	2252	2564	2425	2363	2641
Atp6v0a1	4055	3755	4406	7217	4892	4220	4791	3869	4083	2885	4297	4782	2012	4130	4898	5607
Atp6v0a2	2086	1816	2751	4035	3166	2035	3689	2839	1979	2548	2767	2870	3112	3126	3393	3304
Atp6v0a4	20	15	13	15	21	16	142	29	26	23	14	24	30	51	31	28
Atp6v0b	2047	3553	3260	5250	2848	3587	4018	3308	2990	6383	1990	3717	7182	5384	3967	3005
Atp6v0c	13263	18667	15050	26368	18320	16881	21881	16269	15984	18304	12865	16157	17249	16683	18177	19549
Atp6v0c-ps2	7	11	6	10	8	13	13	7	8	7	7	10	9	11	5	14
Atp6v0d1	2342	2947	2800	4861	3136	3102	2929	2866	3110	3489	2416	3025	4107	3232	3553	3401
Atp6v0d2	24	28	21	48	82	55	50	74	39	48	16	78	236	101	108	34
Atp6v0e	1232	1856	1692	2509	1868	1799	2776	1816	1451	2862	1231	1721	2691	2461	2098	1759
Atp6v0e2	2997	3819	3272	5078	3959	3147	4208	3308	3380	4021	2777	3026	3419	3353	3244	4221
Atp6v1a	5227	4145	4863	7810	6117	4123	4808	4792	4464	4839	4884	5942	6776	5533	5840	7476
Atp6v1b1	0	0	1	2	1	0	1	6	0	3	2	3	0	1	2	3
Atp6v1b2	5357	5518	5195	8723	7990	6467	5085	5364	6014	5219	4775	6611	8600	7252	6700	7135
Atp6v1c1	2117	2702	2564	4232	3158	2941	3071	2755	2653	3250	2146	2913	3765	3438	3031	3080
Atp6v1c2	4	6	8	5	8	8	37	5	5	3	1	18	16	18	51	4
Atp6v1d	2507	3263	2854	4759	3785	3313	3075	2864	3284	3305	2696	3439	3642	3424	3516	3934
Atp6v1e1	5081	7162	5967	9114	7753	6064	5471	5458	5947	7271	4757	6421	9097	7337	6420	6980
Atp6v1f	2890	4090	3427	4881	4445	3356	2816	2791	2916	5876	2207	4129	7280	5339	3704	3868
Atp6v1g1	4333	6187	5009	8435	5318	5394	5328	4824	5145	8252	3685	6164	10191	7329	5785	5670
Atp6v1g2	23	12	8	45	21	23	30	12	8	20	12	20	14	17	25	21
Atp6v1h	1423	1860	1512	2630	2332	1757	1507	1502	1584	1886	1352	1977	2767	2236	2173	1946
Atp7a	1905	560	1673	2780	1513	957	1490	1657	1388	1429	2294	2227	1262	1617	2193	2669
Atp7b	196	131	171	223	107	70	57	150	95	133	198	113	36	85	67	233
Atp8a1	195	128	200	333	220	167	285	187	166	179	126	326	161	274	371	255
Atp8a2	6	9	16	16	5	11	15	3	3	10	5	19	9	17	11	8
Atp8b1	27	26	18	43	27	9	107	28	10	13	15	9	12	29	27	20
Atp8b2	822	737	901	1261	893	594	1184	946	806	672	910	874	471	781	1073	1247
Atp8b3	12	2	1	18	6	12	12	6	2	3	6	11	7	6	4	6
Atp8b4	3	15	20	32	57	34	44	17	13	22	11	90	94	101	99	22
Atp8b5	0	2	3	8	2	8	5	2	3	8	5	2	2	3	5	4
Atp9a	1876	1959	2107	3150	2626	1713	1994	1696	1912	1606	1874	2358	1983	2144	2209	2661
Atp9b	674	653	750	1276	919	639	1008	743	775	628	726	800	579	770	844	1012
Atpaf1	576	703	688	1066	709	589	860	672	583	899	512	688	1151	929	822	828
Atpaf2	477	585	526	911	655	497	672	536	528	520	448	561	610	575	636	652
Atpif1	1800	2676	2513	3686	2371	2478	2240	2258	2068	4094	1670	2860	4953	3547	2525	2392
Atpsckmt	205	217	230	457	331	264	293	238	181	406	235	299	347	373	287	321
Atr	815	501	675	1250	846	532	604	637	768	548	869	889	423	792	769	1036
Atraid	635	890	635	1119	861	645	711	535	647	797	569	719	961	792	630	850
Atrip	390	387	414	693	492	356	452	384	403	434	394	381	474	457	467	559
Atrn	1476	945	1429	2595	1723	1199	1817	1372	1361	1032	1469	1728	668	1468	1650	2145
Atrnl1	840	533	840	1345	873	646	1043	808	814	654	729	834	511	720	971	1223
Atrx	6470	3941	6353	11333	7603	4724	5363	5865	5396	4940	7939	7389	2763	6440	6124	9354
Atxn1	366	242	378	577	449	341	416	302	396	319	414	430	163	369	441	506
Atxn10	3713	3833	4256	5542	4652	3505	4266	3770	3872	3854	3260	4242	5448	4688	4230	4639
Atxn1l	1256	845	1136	1939	1257	943	1119	942	1250	654	1221	1330	513	1024	1135	1644
Atxn2	1400	911	1590	2356	1631	1195	1304	1401	1203	1034	1671	1703	635	1421	1509	2061
Atxn2l	5860	3554	5058	9505	5779	4228	4714	4252	4579	3669	4818	6340	2381	4896	5675	7002
Atxn3	908	686	983	1693	1294	889	1074	899	1026	918	924	1331	1231	1149	1094	1334
Atxn7	348	271	357	674	406	265	338	306	271	286	334	464	210	386	396	509
Atxn7l1	275	268	352	559	471	303	370	299	319	281	366	513	319	429	480	479
Atxn7l2	333	274	333	550	355	247	233	291	272	296	390	316	163	302	217	399
Atxn7l3	1402	1353	1525	2337	1697	1076	1433	1310	1193	1106	1184	1425	1220	1397	1597	2021
Atxn7l3b	1584	1582	1707	2685	1994	1384	1707	1568	1616	1952	1539	1816	1818	1757	1717	2212
AU020206	922	1121	1047	1822	1642	1351	812	713	859	664	1034	1467	524	1533	1509	1127
AU021092	8	6	11	14	3	4	6	4	2	10	12	1	4	5	6	4
AU022252	522	399	529	862	598	316	418	364	393	488	476	522	425	516	433	742
AU022793	0	5	2	0	5	3	2	2	2	4	2	2	6	0	4	5
AU040320	1227	1076	1145	1848	1551	1028	1245	1056	1224	917	1238	1530	740	1224	1411	1730
AU041133	51	44	48	99	80	58	60	49	34	84	49	90	90	79	53	67
Auh	307	369	354	552	470	346	342	331	349	453	292	507	652	460	380	426
Aunip	115	123	143	208	147	117	138	116	149	129	90	120	141	182	170	127
Aup1	4122	4630	4715	6904	4722	4134	6341	4881	4603	5794	3648	4920	5868	5276	5482	5297
Aurka	982	1164	1261	1893	1080	1071	1759	1440	1257	1684	863	1081	1574	1439	1444	1391
Aurkaip1	886	1209	988	1563	1149	1077	1255	1046	1019	1480	779	1212	1787	1323	1209	1193
Aurkb	1823	1661	1873	3010	1868	1516	2105	2011	2111	2145	1248	1761	2234	2057	2160	2215
Auts2	18	4	9	8	6	4	37	5	6	5	5	6	2	7	13	15
AV039307	2	2	5	9	1	4	2	2	0	1	0	6	2	1	1	6
AV099323	6	10	20	24	22	11	9	11	11	18	13	15	18	15	10	11
AV356131	19	13	5	25	19	11	6	13	15	28	9	16	15	10	3	30
Aven	341	468	501	772	583	484	584	444	443	466	367	431	566	537	547	459
Avil	92	53	3	49	19	21	2	15	40	11	8	36	3	11	2	51
Avl9	1941	1231	1666	2909	1800	1358	1512	1666	1601	1613	1707	2130	1858	1738	1897	2706
Avpi1	343	548	512	518	514	282	667	434	296	793	252	503	842	632	486	448
Avpr1a	0	1	8	3	7	2	35	6	2	5	1	5	2	3	11	6
AW011738	30	32	28	40	78	21	27	18	17	24	27	44	30	21	40	65
AW046200	4	1	4	6	9	8	7	1	3	11	8	4	0	5	2	4
AW112010	1	19	29	31	106	80	25	53	5	31	7	184	383	322	283	11
AW146154	128	90	124	189	156	139	88	118	88	143	113	126	154	132	123	161
AW209491	227	226	196	422	273	182	218	183	228	364	192	285	549	370	238	294
AW549877	1175	732	1093	2173	1361	1002	1081	1028	1031	1269	1109	1511	994	1176	1278	1593
AW551984	1	0	1	7	0	2	11	3	0	3	0	0	0	1	15	1
AW554918	122	111	182	256	188	156	160	174	77	149	130	154	145	165	150	245
Awat2	1	7	7	10	5	7	17	3	8	13	5	10	28	19	15	2
Axdnd1	2	1	6	4	4	2	0	2	0	0	3	4	1	4	1	3
Axin1	1047	953	1169	1795	1161	849	1178	997	1080	863	944	1126	1058	1108	1160	1302
Axin2	136	182	184	348	186	297	180	242	186	218	173	364	297	263	407	241
Axl	193	339	368	749	1171	667	550	330	242	290	167	2566	2167	1945	2823	462
AY036118	12714	13027	8131	13098	11153	7881	0	2267	7227	7673	4173	4408	7969	9760	14524	20702
Azgp1	173	162	189	341	158	169	159	155	119	218	170	161	131	178	129	189
Azi2	982	1131	1069	1832	1292	1056	1294	1087	1026	1443	901	1327	1582	1493	1549	1445
Azin1	1990	1741	2170	3674	2539	1871	2338	2170	2098	2427	1850	2573	3084	2802	2771	3072
Azin2	99	118	61	128	137	69	72	67	92	75	93	120	143	80	58	124
B130021K23Rik	8	7	13	23	15	18	15	8	6	24	22	6	8	12	5	18
B130024G19Rik	5	15	16	21	7	12	8	6	4	10	34	12	4	23	6	12
B130034C11Rik	28	9	25	55	48	22	26	32	18	15	19	17	14	23	21	32
B130046B21Rik	8	12	9	36	21	18	8	3	11	18	34	13	9	8	12	12
B130055M24Rik	49	29	60	112	75	35	47	43	34	47	77	81	69	63	77	69
B230104I21Rik	2	4	6	2	0	0	1	4	0	3	0	2	0	0	1	4
B230118H07Rik	453	532	466	592	566	361	468	387	391	602	357	452	571	471	442	539
B230206L02Rik	51	55	42	66	57	43	30	34	29	60	42	43	51	19	26	45
B230208H11Rik	12	12	24	18	39	11	21	6	17	22	13	1	19	10	13	30
B230216N24Rik	3	0	4	8	4	3	3	3	1	3	5	4	0	3	5	3
B230217C12Rik	137	173	153	274	194	136	124	162	140	198	136	169	170	194	170	160
B230217O12Rik	21	28	14	70	31	4	23	27	21	18	16	13	19	19	12	18
B230219D22Rik	2333	1807	2020	3631	2550	1540	1917	1888	1990	2672	2152	2094	2436	2314	1990	3181
B230303O12Rik	12	9	3	15	7	6	3	3	7	1	6	12	0	9	2	9
B230307C23Rik	68	99	57	121	112	58	66	38	60	104	40	96	106	80	74	95
B230311B06Rik	2	1	0	7	0	4	5	1	4	2	1	0	1	2	0	5
B230317F23Rik	0	2	4	5	1	0	5	3	2	2	1	1	4	1	1	0
B230319C09Rik	1	1	0	2	5	0	4	2	4	0	13	0	1	0	5	4
B230322F03Rik	0	3	1	3	4	5	2	0	1	3	0	2	2	0	2	2
B230354K17Rik	378	268	448	529	415	238	401	347	311	374	412	392	318	379	452	601
B230369F24Rik	7	3	6	16	5	3	4	7	4	8	7	6	6	5	6	4
B230377A18Rik	56	47	75	100	98	35	28	65	69	74	58	54	70	53	63	89
B230398E01Rik	3	4	0	2	0	4	0	3	2	1	5	0	1	4	2	2
B2m	3128	7421	10748	15345	25504	13634	11325	10242	4106	10751	2612	33411	36917	33455	36171	8945
B330016D10Rik	45	63	49	90	102	58	33	47	36	57	57	47	59	37	31	69
B3galnt1	9	13	8	12	10	21	25	17	9	33	1	22	61	25	38	7
B3galnt2	239	328	313	480	286	268	348	311	294	330	323	298	295	315	411	459
B3galt1	69	59	76	154	102	52	168	92	68	66	71	99	60	105	126	110
B3galt2	5	3	10	7	0	4	12	2	1	15	11	3	6	6	4	4
B3galt4	36	63	58	91	83	40	55	39	37	79	37	51	110	82	60	76
B3galt5	138	176	413	335	428	183	548	356	89	243	319	417	273	442	266	334
B3galt6	199	255	243	342	254	200	277	195	232	232	168	216	276	257	262	265
B3gat2	14	16	10	50	38	17	19	13	16	20	43	23	5	23	12	27
B3gat3	379	635	382	754	524	479	567	437	446	581	392	518	602	585	543	561
B3glct	540	468	581	1020	610	482	733	602	583	558	529	569	493	563	627	751
B3gnt2	525	481	556	838	729	552	774	604	583	597	443	667	924	929	713	691
B3gnt3	154	221	248	312	357	141	373	267	198	160	192	232	163	232	306	248
B3gnt4	0	0	3	11	5	0	3	0	1	8	5	11	9	6	4	12
B3gnt5	5	8	0	3	8	4	17	4	0	3	0	6	3	4	3	5
B3gnt7	1	8	5	8	11	4	10	7	14	13	2	4	5	6	11	6
B3gnt8	7	9	7	18	24	10	35	11	7	13	5	19	26	21	41	10
B3gnt9	129	131	160	200	178	117	203	143	138	154	159	161	200	182	216	176
B3gntl1	108	92	118	240	193	114	108	102	129	155	113	140	162	131	125	145
B430203G13Rik	2	1	5	15	7	0	5	2	0	1	8	1	0	2	2	6
B430212C06Rik	10	9	10	14	10	13	19	15	19	13	7	2	8	8	6	8
B430218F22Rik	122	10	94	68	73	8	67	84	59	88	31	65	221	57	83	91
B430219N15Rik	0	0	6	9	7	3	2	3	1	3	4	5	0	7	2	5
B430305J03Rik	298	0	113	23	0	0	0	0	409	67	73	0	376	81	345	232
B430306N03Rik	2	16	10	26	12	28	26	9	3	10	9	38	20	16	36	6
B430319F04Rik	1	2	2	2	5	3	0	10	1	4	0	7	5	7	7	5
B4galnt1	24	38	35	40	79	69	153	59	40	51	15	103	119	140	183	23
B4galnt3	1	0	4	2	1	3	20	1	0	1	0	4	6	5	8	1
B4galnt4	1	0	0	5	2	0	0	1	0	0	1	1	2	0	4	1
B4galt1	556	616	556	1119	846	575	1099	686	538	598	574	871	738	912	940	800
B4galt2	176	189	215	379	297	169	217	210	254	240	181	189	204	193	183	232
B4galt3	646	804	765	1180	768	838	794	643	771	800	775	786	649	720	840	1012
B4galt4	232	359	279	520	373	356	274	327	270	443	399	393	502	397	409	347
B4galt5	1221	1275	1800	2428	1907	1339	2137	1582	1455	1527	1693	1765	1594	1958	1924	2083
B4galt6	638	454	540	955	714	480	553	560	540	400	556	605	424	621	644	1005
B4galt7	489	638	537	837	658	450	648	468	528	664	424	473	689	625	516	639
B4gat1	305	397	299	555	428	342	506	351	297	339	299	345	371	378	380	446
B630019A10Rik	0	8	0	6	7	4	0	0	2	13	9	11	6	0	0	14
B630019K06Rik	30	16	26	34	42	24	19	12	25	29	21	38	16	28	18	23
B930036N10Rik	0	4	0	2	6	0	3	7	9	3	5	3	2	1	0	14
B930059L03Rik	29	21	16	29	13	12	12	12	19	45	19	15	5	15	16	22
B930086L07Rik	1	0	3	4	2	2	2	3	0	4	4	1	0	1	0	1
B930094E09Rik	16	13	13	21	34	7	9	9	9	13	13	21	10	12	27	26
B930095G15Rik	57	32	66	108	86	49	45	27	67	50	80	50	17	50	29	102
B9d1	123	253	163	292	174	212	201	208	186	398	97	242	395	299	227	209
B9d1os	5	2	1	4	0	0	3	0	0	6	1	5	0	2	1	0
B9d2	182	200	224	267	254	230	189	222	212	326	147	277	474	374	236	209
Baalc	6	5	2	5	10	4	7	5	1	6	3	3	5	5	5	3
Babam1	1303	1701	1487	2386	1782	1604	1664	1545	1609	2034	1115	1446	2360	1704	1679	1825
Babam2	1092	1222	1077	1767	1197	1098	986	1075	1105	1097	969	1106	967	1117	1221	1452
Bace1	774	619	887	1373	988	614	1005	792	708	757	956	963	539	901	1002	1236
Bace2	2022	2706	3606	6093	3689	5277	4913	3833	3523	4755	2865	6044	7426	6369	7139	3260
Bach1	501	344	456	900	691	439	746	561	431	438	514	666	458	623	812	746
Bach2	43	15	29	56	49	20	41	32	28	21	46	46	19	33	32	30
Bach2os	0	0	0	1	4	2	3	0	9	1	4	0	2	4	1	3
Bad	314	470	436	563	473	308	436	346	310	572	295	455	716	559	419	434
Bag1	2072	2764	2727	3729	2960	2196	3358	2587	2122	3020	2091	2487	3174	2896	2715	2982
Bag2	703	815	1036	1232	955	657	900	849	701	1087	830	807	1044	1120	952	996
Bag3	1070	1077	1318	1857	1465	1012	1181	1055	938	867	1084	1383	779	1314	1422	1531
Bag4	756	604	705	1053	772	533	696	694	689	605	715	708	868	659	625	1043
Bag5	1413	1437	1353	2191	1813	1314	1328	1333	1434	1254	1107	1491	1486	1412	1424	1748
Bag6	5551	4506	5652	9265	7078	4494	5092	4968	5405	4113	5071	6043	3801	5158	6249	7263
Bahcc1	2155	1169	2147	3795	2883	1004	1884	1870	1289	1332	2907	2041	312	1614	1426	3709
Bahd1	495	522	540	908	716	462	480	517	518	400	608	681	350	554	723	908
Baiap2	384	406	445	640	558	277	569	478	310	404	465	496	316	449	520	538
Baiap2l1	658	419	457	873	635	417	492	553	519	436	479	644	438	486	697	809
Baiap2l2	14	12	10	30	19	18	17	8	22	13	17	9	1	16	11	14
Baiap3	0	4	0	4	4	6	7	9	0	11	0	6	5	7	9	0
Bak1	2268	2689	3162	4441	3479	2343	3506	3116	2621	2907	2329	3155	3279	3474	3372	3152
Bambi	160	213	135	261	179	220	262	178	215	272	137	173	272	239	273	265
Banf1	1341	2172	1746	2622	1742	1728	2502	1757	1764	2306	1023	1631	2608	2290	1919	1629
Bank1	5	1	0	4	0	1	1	2	0	0	2	4	12	17	4	6
Banp	314	353	562	516	407	297	374	403	362	433	490	400	410	409	462	588
Bap1	1334	1298	1459	2370	1716	1154	1626	1478	1347	1815	1175	1454	1990	1680	1659	1922
Bard1	346	349	487	740	458	394	470	441	437	414	402	445	335	534	533	517
Barx2	2	0	2	0	0	0	42	1	1	0	0	1	8	2	30	0
Basp1	350	265	268	564	627	284	345	252	324	237	190	495	416	403	383	370
Batf	60	70	71	102	103	86	107	90	93	112	51	76	165	114	121	73
Batf2	5	22	108	97	170	192	49	47	25	61	5	419	418	557	545	26
Batf3	11	36	32	17	13	13	26	18	13	15	6	17	22	25	29	17
Bax	2102	3337	2494	3858	3190	2177	3013	2257	2244	3242	1920	2135	3255	2728	2379	3032
Baz1a	1484	1216	2026	2492	1890	1350	1997	1774	1532	1203	1816	1868	1039	1828	2130	2210
Baz1b	2925	2572	3442	5603	3606	2805	3434	3312	3135	2736	3727	3597	2076	3611	3980	4436
Baz2a	1610	988	1621	2433	2091	1198	1563	1381	1228	890	1834	1833	599	1428	1680	2378
Baz2b	499	323	446	927	491	383	468	441	343	400	558	642	236	491	522	662
BB557941	1	1	0	5	1	0	0	0	1	4	0	0	2	0	3	3
Bbc3	238	281	171	334	275	134	125	111	207	151	113	158	131	186	170	372
Bbip1	292	395	390	640	385	345	421	342	302	440	335	393	454	459	342	428
Bbof1	40	16	64	60	56	36	37	28	30	30	35	32	46	63	50	39
Bbs1	112	115	95	197	136	107	124	119	118	123	107	133	62	111	162	143
Bbs10	86	65	113	124	102	44	84	52	116	120	77	84	124	127	73	113
Bbs12	88	111	114	206	134	102	154	115	65	189	114	122	183	158	128	164
Bbs2	291	275	299	477	372	328	266	269	289	260	312	316	324	327	310	391
Bbs4	259	300	295	464	284	235	294	272	215	377	246	262	438	342	310	382
Bbs5	93	150	87	189	128	140	110	91	91	169	98	128	177	122	148	112
Bbs7	264	230	216	471	362	232	290	262	246	314	268	306	307	266	292	375
Bbs9	223	200	207	370	268	216	200	233	226	221	247	229	228	242	222	304
Bbx	1381	663	1135	1548	1334	715	721	929	942	713	1081	1092	486	1047	1139	1779
BC002059	88	111	89	161	104	66	131	104	94	197	109	100	215	193	100	114
BC003965	328	504	370	644	500	397	435	301	297	516	307	391	443	474	422	460
BC004004	1745	2274	1921	3172	2350	1679	2233	1906	2039	2328	1666	2162	2754	2397	2119	2436
BC005537	2710	2706	2566	4406	3523	2380	2838	2452	2468	2216	2341	3314	1997	2748	3298	3557
BC005624	751	1001	893	1268	949	759	902	785	789	986	751	852	1053	936	890	1062
BC017158	491	443	570	989	633	534	579	451	572	499	464	581	411	606	626	695
BC022960	12	12	35	28	22	10	20	9	9	12	19	15	17	16	2	21
BC023105	1	0	1	0	8	5	2	6	0	6	0	19	8	10	17	0
BC024063	58	58	75	102	63	50	82	66	82	96	62	84	106	114	69	101
BC024978	141	154	186	258	196	132	135	138	162	135	134	180	118	161	153	213
BC025920	31	29	23	49	27	23	19	15	22	36	28	19	17	20	6	37
BC028528	10	16	29	49	34	26	51	26	24	49	20	39	66	63	45	32
BC029722	623	803	648	1103	946	653	587	684	617	841	602	835	1010	832	779	871
BC030343	17	21	30	54	24	15	25	18	10	26	18	26	12	17	15	30
BC030867	301	403	464	608	449	434	544	436	470	453	401	454	328	452	566	405
[truncated: 16,133 more rows]

## Sheet: SMAC_ICB_RNASeq_Normalized
	Vehicle_S1	Vehicle_S2	Vehicle_S9	SMAC_S3	SMAC_S11	SMAC_S12	ICB_S5	ICB_S13	ICB_S14	SMAC+ICB_S7	SMAC+ICB_S8	SMAC+ICB_S15
mt-Co1	13.4397	13.0644	13.4532	13.2536	13.6057	13.4682	13.5128	13.4896	13.655	13.4825	12.5973	13.6614
Eef1a1	13.2818	13.4431	13.1444	13.9643	13.2637	13.2049	13.3413	13.2042	13.3072	13.6187	13.1908	13.2297
Gapdh	13.5056	13.4799	13.4626	13.3402	13.477	13.21	13.3832	13.5299	13.2633	13.2411	13.2286	12.8454
Dct	12.7584	12.9377	12.7158	13.0927	12.6439	12.7917	12.9008	12.3256	12.878	12.8284	12.8031	12.4853
Eno1	12.8345	12.714	12.8293	12.5953	12.7711	12.6841	12.6206	12.82	12.571	12.5337	12.496	12.2627
Tyrp1	12.0764	12.7756	12.0395	12.543	12.4856	12.5878	12.8082	12.1061	12.8296	12.8759	13.0548	12.9986
Pkm	12.4611	12.3913	12.4438	12.2281	12.4358	12.2584	12.3332	12.5185	12.2625	12.154	12.2622	11.7305
Ftl1	11.9636	12.3547	11.9446	12.5052	12.1274	12.1598	12.0793	12.0031	12.6671	12.07	12.222	12.2912
Gpnmb	11.9288	11.9327	11.9611	11.9072	12.1927	11.9782	12.4082	12.5041	12.2312	12.4699	12.3785	12.2842
mt-Cytb	11.7982	11.7763	11.9672	11.9213	12.306	12.2409	11.8433	11.8975	12.2409	11.8432	10.9898	12.3506
Pgk1	12.027	11.9428	12.0335	12.1973	11.9838	11.8049	11.9819	12.0648	11.8484	12.0673	11.7146	11.1945
Aldoa	11.9048	11.9477	11.8978	12.0263	11.955	11.7917	12.022	11.9568	12.0051	11.9433	11.9295	11.3248
Pmel	11.3965	12.0453	11.3662	11.7907	11.5635	11.8072	11.9332	11.4312	12.2179	11.8597	12.1966	11.9461
Actg1	11.7597	12.0176	11.6981	11.4188	11.7732	11.5934	11.7022	11.6713	11.9476	11.6384	11.8519	11.3137
Hsp90ab1	11.6883	11.7937	11.6108	11.6289	11.72	11.5945	11.694	11.7429	11.699	11.6554	11.7012	11.578
Atp1a1	11.9043	11.9045	11.8695	11.1926	11.6048	11.6596	11.7631	11.7806	11.6235	11.2873	11.6301	11.5645
Eef2	11.8592	11.8377	11.8581	11.1649	11.6897	11.6248	11.7451	11.7576	11.5815	11.4244	11.6204	11.3371
Hspa8	11.0928	11.2671	11.3944	11.7615	11.7241	11.3271	11.6158	11.6873	11.8222	11.892	11.8112	11.5983
Ldha	11.5872	11.6662	11.5978	11.8437	11.6641	11.4269	11.4466	11.7035	11.4996	11.7147	11.4909	11.1911
Ppia	11.1959	11.4657	11.1467	11.9591	11.4049	11.3399	11.4476	11.2422	11.5779	11.7375	11.2826	11.373
Actb	11.214	11.5913	11.1781	11.2543	11.7784	11.2974	11.3184	11.3102	11.5482	11.4029	11.507	11.2593
mt-Nd1	11.3285	11.1026	11.465	11.3264	11.681	11.5986	11.1989	11.2295	11.5594	11.2163	10.3363	11.9012
Tpi1	11.319	11.4073	11.3453	11.5386	11.5003	11.1866	11.3062	11.3351	11.3266	11.284	11.3313	10.9378
mt-Nd4	11.1139	10.9349	11.2647	11.07	11.5402	11.4616	11.0432	11.0455	11.4197	11.0614	10.2324	11.4454
Ptma	10.8944	11.2371	10.8439	11.2914	11.1971	11.0538	10.9084	11.0514	11.1111	11.0663	10.9425	11.3296
Rplp0	10.8129	10.9583	10.7515	11.8307	10.8794	10.8294	10.9117	10.8644	10.9153	11.3179	10.829	11.0842
Scd2	11.5988	11.0066	11.6333	10.4995	11.153	11.0362	10.7706	10.6971	10.6412	10.3421	10.8139	11.2711
Tuba1b	10.7337	11.105	10.6436	11.4304	11.113	10.7575	10.6593	10.7857	10.9462	11.0874	10.9734	11.1359
Hsp90aa1	10.7272	11.08	10.6261	10.7578	10.9576	10.7382	10.7701	10.7044	11.2049	10.8267	11.0657	11.1724
Rpsa	10.7027	10.9732	10.6093	11.4975	10.8222	10.6925	10.7129	10.7634	11.0449	11.0681	10.6922	11.0241
Vim	10.6071	10.7217	10.5386	10.6281	11.0155	10.7805	10.7219	11.2309	10.6852	10.9133	10.9084	10.9075
Rps2	10.6565	10.8334	10.6288	11.3795	10.7768	10.6912	10.4638	10.7786	10.7999	10.9191	10.7076	11.0157
mt-Nd5	10.8434	10.4335	10.9906	10.6995	11.158	10.9432	10.8469	10.7985	10.7862	10.8963	9.92737	11.0008
Atp5b	10.7476	10.8556	10.6777	10.8783	10.6908	10.6254	10.6944	10.7163	10.8023	10.8356	10.7756	10.7199
mt-Co3	10.306	10.689	10.5378	10.9529	10.9381	10.6823	10.6758	10.6862	11.097	10.8429	10.27	11.302
Met	10.4884	10.874	10.5816	10.375	10.657	10.7638	11.0503	10.6727	10.9315	10.7993	10.9499	10.6922
Rpl4	10.8704	10.8813	10.7732	10.6697	10.7151	10.675	10.6956	10.7767	10.7542	10.6125	10.621	10.6516
Gpi1	10.9545	10.6983	10.9158	10.4315	10.7816	10.591	10.7407	11.0764	10.6637	10.5931	10.5247	10.0521
mt-Co2	10.3608	10.9907	10.5878	11.0992	11.0168	10.6794	10.568	10.623	11.1248	10.4396	9.46463	10.8432
Pgam1	10.6577	10.6398	10.7097	10.9622	10.7361	10.5288	10.5764	10.6281	10.5229	10.6621	10.6285	10.4411
Rack1	10.4311	10.5877	10.2777	11.3341	10.5236	10.3734	10.5871	10.3979	10.5064	10.9837	10.523	10.4202
Fth1	10.4153	10.6916	10.3934	10.7879	10.4231	10.4039	10.5981	10.631	11.0556	10.5122	10.4558	10.5561
Ctnnb1	10.7376	10.729	10.7091	10.1197	10.4824	10.5588	10.4844	10.5827	10.5001	10.2306	10.3839	10.1942
Rps3a1	10.3037	10.6148	10.285	10.925	10.449	10.3445	10.1778	10.4845	10.5975	10.54	10.2574	10.6855
Ubb	10.3038	10.4834	10.3418	10.5141	10.5601	10.3987	10.6784	10.2401	10.5433	10.6323	10.598	10.3545
Rpl8	10.3268	10.4794	10.2327	10.861	10.4632	10.3544	10.1886	10.3923	10.5033	10.5626	10.3385	10.5092
Tubb5	10.3568	10.5883	10.2481	10.3904	10.5786	10.2985	10.2156	10.3589	10.3672	10.348	10.4238	10.3935
Hsp90b1	10.3779	10.4206	10.1964	10.237	10.3621	10.2599	10.2782	9.84405	10.6164	10.3761	10.4457	10.8972
Rpl3	10.3449	10.3871	10.2181	10.6953	10.2269	10.2319	10.361	10.4297	10.3155	10.5322	10.1904	10.1543
Rpl13a	9.9405	9.93305	9.92085	11.2679	10.5616	10.2552	10.4164	10.1651	10.2995	10.9961	10.1343	10.179
Pabpc1	10.3748	10.5396	10.2901	10.1161	10.3634	10.2485	10.3368	10.2623	10.24	10.0606	10.1771	10.5043
P4hb	10.5061	10.1905	10.2513	10.694	10.3766	10.0931	10.1599	10.0977	10.0141	10.4683	10.2104	10.4351
Hspd1	10.1922	10.4182	10.1373	9.97627	10.3359	10.2954	10.1896	10.1765	10.5422	10.2354	10.3305	10.6554
Tpt1	10.1692	10.2354	10.095	10.6335	10.2311	10.1066	10.2934	10.2809	10.3633	10.5686	10.1269	10.3027
Rpl6	10.1286	10.3608	10.0984	10.512	10.2293	10.1618	10.1664	10.2665	10.3684	10.4477	10.18	10.3908
Rplp1	10.1403	10.2233	10.1518	10.5971	10.184	10.2076	9.90874	10.376	10.4627	10.4477	10.2441	10.331
Hnrnpab	10.2831	10.5556	10.1818	10.1003	10.4485	10.2584	10.1707	10.1976	10.3148	10.1364	10.276	10.2856
Gnas	10.3839	10.4021	10.3946	10.2057	10.2649	10.2831	10.3067	10.3485	10.2362	10.0529	10.3209	9.87495
Npm1	10.1794	10.416	10.0676	10.3811	10.235	10.1849	10.2227	10.1157	10.3562	10.2717	10.0832	10.3097
Rpl19	9.98247	10.1616	9.88011	11.0533	10.221	9.98657	10.2822	10.0134	10.2187	10.6672	10.029	10.2508
Eif4g2	10.334	10.3294	10.2014	10.1965	10.2316	10.1611	10.1654	10.061	10.1307	10.233	10.2133	10.3817
Nedd4	10.3646	10.3635	10.4288	9.93951	10.317	10.3378	10.2391	10.1971	10.124	9.99235	10.1634	10.0981
Rps6	10.0022	10.2259	9.969	10.6845	10.216	10.0716	10.0598	10.1525	10.3	10.44	10.0784	10.3276
Rps3	9.90037	10.0936	9.81019	10.9785	10.1956	10.058	10.1586	10.0439	10.2317	10.6758	9.93342	10.0995
Hnrnpa2b1	10.1099	10.2447	10.191	10.1137	10.2567	10.2945	10.0131	10.2359	10.3318	10.1322	10.0684	10.1479
Rpl7a	10.0152	10.1113	9.94802	10.7299	10.2132	10.0567	10.1169	10.0109	10.184	10.4104	10.0398	10.2329
Hspa5	10.284	10.0814	10.0398	10.2521	10.0896	9.99676	10.0366	9.49163	10.3245	10.4109	10.3079	10.7539
Rps7	9.8337	10.1803	9.70433	11.1367	10.0552	9.93144	9.99363	10.0299	10.1939	10.5984	10.0159	10.3627
Bsg	10.2716	10.1732	10.0771	10.4579	10.2702	9.99128	10.1868	10.087	10.0735	10.2253	9.96388	9.96561
Eif5a	9.90709	10.2324	9.82838	10.5899	10.2118	10.0429	9.9189	9.95489	10.1431	10.3657	10.1152	10.4226
Hnrnpa3	10.2262	10.3086	10.1647	9.77133	10.302	10.2229	10.0576	10.1791	10.2631	9.98519	10.0489	10.1006
Rpl13	10.0247	10.2497	9.97027	10.4061	10.0995	10.0387	10.09	10.073	10.2782	10.3053	9.98309	10.0932
mt-Atp6	9.75715	9.72307	10.3306	9.85308	10.4644	10.3646	9.7469	10.3111	10.7449	10.0798	9.74998	10.1767
Rps4x	10.0166	10.2151	10.0376	10.4207	10.0873	10.0227	9.97168	10.1366	10.248	10.0658	9.94351	10.056
Ywhae	9.94385	10.2014	9.89622	10.4106	10.0827	9.93976	9.94853	9.96295	10.1916	10.1963	10.0474	10.1903
Ncl	10.1656	10.3024	9.90062	9.5298	10.3445	10.0308	10.0791	10.1086	10.1807	10.007	9.96023	10.265
Rpl32	9.88091	9.83458	9.79958	10.7547	10.0985	10.0034	10.1687	9.96822	10.0787	10.4912	9.82365	9.95629
Cfl1	9.89735	10.1486	9.88114	10.0964	10.188	10.0276	9.89658	10.1	10.1614	10.0039	10.0701	10.0046
Eps8	9.76827	10.1182	9.77715	9.97988	9.89727	10.1809	10.3529	9.8444	10.2739	10.1065	10.222	9.88467
Rpl7	9.91676	10.1026	9.83125	10.4292	9.97939	9.90621	9.93592	9.91563	10.1412	10.2719	9.85893	10.1022
Syt4	10.2425	10.1977	10.2009	10.0037	10.1279	9.91197	10.0511	10.0828	10.1021	9.85395	9.77514	9.79628
Ddx5	10.2302	10.2375	10.0477	9.8219	9.88955	10.2025	10.1598	9.8531	10.1283	9.89709	9.84323	9.80176
mt-Nd2	9.94772	9.81737	10.1201	10.1295	10.3717	10.2632	9.95997	9.81933	10.3042	9.89887	9.15812	10.3069
Ctsd	9.66696	9.78507	9.75119	10.2829	9.79967	9.86466	10.078	9.91051	10.0905	10.1844	10.2597	10.3503
Atp5a1	9.99223	10.0947	9.96979	9.91048	10.0583	9.91305	9.87857	9.98389	10.0875	10.031	10.0223	10.0391
Arhgdia	9.94265	10.1267	9.88867	9.84188	10.1737	9.95972	9.88067	10.0073	10.0295	9.90781	10.0709	10.1081
Eif4a1	9.94892	10.1019	9.89194	10.0682	9.98235	9.84605	9.85394	9.91822	9.96142	10.0632	9.99378	10.0055
Rpl12	9.61227	9.78763	9.59174	10.6981	9.77682	9.73921	9.81635	9.85608	9.98389	10.4698	9.74246	10.1483
Calr	9.64819	9.78318	9.60023	10.1207	10.0893	9.81738	9.82158	9.18375	10.0391	10.2395	10.0844	10.7475
Canx	9.96478	10.0084	9.90982	9.82742	9.97704	9.92542	9.87317	9.60862	9.92342	9.79485	9.9818	10.3785
Rcc2	10.0206	10.2723	9.90272	9.64703	10.0325	9.99314	9.71512	9.99595	10.0106	9.6717	9.79338	10.0942
Slc45a2	9.76486	10.1231	9.79459	9.86963	9.70419	9.90971	10.0092	9.60153	10.1232	9.89687	10.1359	10.0661
Prdx1	9.51025	10.0337	9.46454	10.4649	9.6623	9.78517	9.88403	9.54741	10.3086	10.1672	9.98289	9.89214
Serbp1	9.91948	10.0978	9.80244	9.77765	10.06	9.80499	9.80725	9.91357	9.90266	9.76617	9.84391	9.99396
Ybx1	9.79665	9.95543	9.75436	10.0886	9.94067	9.76283	9.69918	9.65505	9.85165	9.856	9.87212	9.9574
Sqstm1	10.2196	10.0838	9.93646	9.77523	9.70455	9.78323	9.94116	9.98933	9.84926	9.67453	9.71933	9.38115
Psap	9.47675	9.66427	9.58471	9.55735	9.60006	9.6715	10.0624	9.98459	10.0187	9.99941	10.2816	9.98305
Tyr	9.78939	9.82033	9.88591	10.0873	9.7007	9.84791	10.034	9.45049	9.85232	10.0642	9.64042	9.41853
Eif4g1	9.74239	9.89662	9.74227	9.30829	10.0481	9.77704	9.76363	9.6792	9.77118	9.69568	9.89048	10.1272
Ran	9.49319	9.77881	9.4295	10.4106	9.85658	9.67167	9.66858	9.46254	9.79501	10.2485	9.72063	9.87817
Slc25a5	9.74614	9.78819	9.72368	9.90289	9.83152	9.68306	9.7352	9.81528	9.78104	9.95899	9.73659	9.70286
Rpl10	9.71099	9.68735	9.68384	10.0918	9.69424	9.7542	9.67135	9.75958	9.79679	9.95448	9.75929	9.76831
Atp6v0c	9.60522	9.85403	9.68738	9.91056	9.64089	9.75715	9.62513	9.67057	10.0111	9.61898	9.75802	10.0272
Rpl27	9.40883	9.66746	9.36425	10.4889	9.8864	9.62434	9.73677	9.66322	9.78504	10.2261	9.50831	9.79674
Akt1	9.67123	9.89004	9.57796	9.81316	9.93615	9.73009	9.60218	9.7453	9.64668	9.73411	9.73635	10.0391
Mif	9.62863	9.80985	9.71733	10.0438	9.8881	9.68024	9.67894	9.81071	9.90257	9.72699	9.63654	9.59392
Apoe	9.47091	9.73106	9.52765	9.91724	9.57459	9.62997	9.76517	9.81143	9.96319	9.91572	9.87417	9.78338
Rps18	9.44684	9.58905	9.37721	10.4952	9.88259	9.64755	9.80023	9.50096	9.73014	10.2781	9.51997	9.58463
Rps9	9.51048	9.65901	9.49539	10.3602	9.72694	9.60654	9.65307	9.66646	9.78764	10.0823	9.53329	9.67013
Rpl10a	9.44124	9.60994	9.42216	10.2834	9.8007	9.62056	9.75843	9.58942	9.7486	10.0743	9.54014	9.68249
Hnrnpf	9.74752	9.94979	9.64864	9.41237	9.7381	9.69385	9.55224	9.5935	9.75505	9.63163	9.62718	9.57664
Rpl15	9.3992	9.5923	9.33929	10.2957	9.70235	9.54531	9.59891	9.49706	9.62406	9.91445	9.55839	9.70748
Rpl29	9.53889	9.70066	9.51581	9.90155	9.68135	9.61628	9.49857	9.64947	9.70595	9.68605	9.48788	9.69831
Serpinh1	9.54842	9.82825	9.56444	10.0831	9.54897	9.6459	9.3157	9.10716	9.68446	9.54098	9.65566	10.1547
Hnrnpk	9.71221	9.83128	9.61908	9.52631	9.6038	9.65925	9.61149	9.56133	9.64227	9.62467	9.57326	9.51045
Rbm3	9.57821	9.46607	9.46876	10.0734	9.66145	9.51179	9.62316	9.73757	9.41351	10.0399	9.25668	9.56542
Cct7	9.59627	9.84215	9.44791	9.69339	9.59056	9.45578	9.51041	9.58734	9.7379	9.59465	9.60458	9.55008
Hnrnpa1	9.76943	9.77605	9.66792	9.36955	9.71169	9.70569	9.52743	9.72428	9.61272	9.4499	9.39794	9.43074
Vdac1	9.65923	9.69473	9.58574	9.61595	9.77516	9.5189	9.56654	9.56285	9.66134	9.57392	9.552	9.33555
Oxct1	9.40208	9.70557	9.48829	9.68835	9.49665	9.428	9.72257	9.08771	9.80134	9.76163	9.7909	9.64946
Pfn1	9.39606	9.70487	9.42543	9.71684	9.73729	9.53169	9.39838	9.67222	9.60561	9.611	9.65762	9.5564
Hnrnpu	9.68951	9.75841	9.58613	9.10497	9.81139	9.6232	9.59955	9.67379	9.62607	9.48391	9.54134	9.51196
H3f3b	9.90683	9.87855	9.57748	9.59236	9.49792	9.58346	9.51041	9.75943	9.58061	9.51035	9.28571	9.3014
Sdcbp	9.28243	9.75619	9.35925	9.57158	9.37491	9.48144	9.55196	9.44948	9.92832	9.67753	9.81208	9.36559
Rpl18a	9.38445	9.63809	9.34229	10.0419	9.5345	9.28839	9.31005	9.60327	9.68468	9.70752	9.44386	9.59232
Ero1l	10.4501	9.6835	10.1463	9.23176	9.60321	9.52032	9.58658	9.9512	9.29399	9.39682	8.99085	8.71531
Rps15	9.33046	9.5567	9.21098	10.1909	9.58529	9.42663	9.5544	9.34006	9.66395	9.80393	9.28978	9.4835
Slc25a4	9.65955	9.66407	9.66297	9.52549	9.52279	9.40814	9.45543	9.57687	9.65654	9.65451	9.35188	9.28031
Fkbp4	9.26147	9.80501	9.30565	9.79158	9.57509	9.46492	9.2854	9.16722	9.76451	9.50428	9.79493	9.68216
Rps12	9.06114	9.31085	9.07487	10.2688	9.45778	9.36858	9.55046	9.38663	9.74511	10.0818	9.30006	9.76262
Rps10	9.18958	9.53659	9.14759	10.412	9.54211	9.34438	9.43184	9.37585	9.56625	9.8785	9.36341	9.56288
Pdia3	9.28908	9.58742	9.21569	9.68604	9.42687	9.34154	9.33734	9.12117	9.66526	9.7731	9.69624	10.1881
Eef1b2	9.36145	9.57936	9.30613	10.0985	9.43175	9.40828	9.38936	9.49288	9.68767	9.7904	9.30311	9.42855
Rps14	9.03844	9.27098	8.73625	10.7538	9.56199	9.30308	9.46375	9.28968	9.55387	10.2782	9.40921	9.60589
Rps24	8.9344	9.15137	8.99377	10.4917	9.44477	9.33657	9.63483	9.38711	9.70542	10.1509	9.32653	9.66929
Csrp1	9.38749	9.63621	9.22294	9.85783	9.50825	9.35208	9.72307	9.32942	9.66819	9.8811	9.51603	8.96936
Prrc2a	9.6208	9.56311	9.64872	8.87663	9.71433	9.57305	9.57035	9.61861	9.47478	9.31741	9.54272	9.48552
Ubc	9.76613	9.65922	9.67046	8.96292	9.62509	9.53348	9.70671	9.28937	9.55211	9.47257	9.6217	9.13295
Rpl18	9.29436	9.44872	9.30834	9.92437	9.56381	9.44189	9.36701	9.47928	9.53402	9.72466	9.371	9.51891
Rpn1	9.51199	9.74056	9.36563	9.53748	9.49887	9.34293	9.34657	9.15781	9.53652	9.432	9.55784	9.9184
Slc25a3	9.43831	9.48659	9.50823	9.36794	9.43209	9.38864	9.34354	9.57477	9.63319	9.55786	9.51462	9.57339
Caprin1	9.43868	9.50556	9.45876	9.35457	9.5966	9.43589	9.61617	9.4088	9.35438	9.51928	9.65524	9.3506
Vat1	9.33165	9.55581	9.34304	9.23843	9.51935	9.40011	9.49281	9.44009	9.58727	9.4244	9.61444	9.53105
Eef1g	9.33506	9.5717	9.26726	9.75509	9.33293	9.411	9.29115	9.24055	9.52256	9.4671	9.47886	9.66937
Rpl27a	9.22243	9.48659	9.15465	10.0298	9.36357	9.32856	9.40474	9.27649	9.55434	9.71668	9.23026	9.55183
Rpl21	9.27602	9.39489	9.24887	9.80987	9.45941	9.44039	9.37244	9.3896	9.59311	9.53751	9.192	9.48158
Mitf	9.58617	9.71236	9.72014	8.98464	9.60802	9.05838	10.012	9.89441	9.54008	9.05272	9.03435	8.92645
Rps26	9.17997	9.39849	9.17869	10.2365	9.41481	9.25546	9.14574	9.31961	9.44927	9.53146	9.2946	9.71552
Tuba1a	9.2576	9.48915	9.32532	10.1779	9.57379	9.2567	9.06577	9.02331	9.53877	9.55894	9.37256	9.47056
Gnb1	9.50897	9.54131	9.46859	9.33684	9.49612	9.43637	9.34245	9.46173	9.39778	9.30864	9.38823	9.38022
Calu	9.71241	9.64948	9.54738	9.32637	9.56311	9.30802	9.26469	9.16733	9.3506	9.19548	9.19259	9.73535
Rps8	9.20387	9.35221	9.16942	9.96022	9.34027	9.31041	9.15999	9.26078	9.51221	9.73873	9.29383	9.47791
Plxna1	9.36749	9.40823	9.6231	8.96944	9.41111	9.49358	9.53077	9.33221	9.26002	9.17375	9.48855	9.69964
Tecpr1	9.76165	9.55936	9.78738	8.86382	9.38776	9.62692	9.61752	9.46845	9.46869	9.09101	9.27155	8.8088
Calm1	9.15299	9.36898	9.13823	9.70289	9.45189	9.21986	9.21465	9.35895	9.38279	9.63617	9.46093	9.59116
Pcbp1	9.36941	9.50671	9.32418	9.20591	9.57459	9.35201	9.34798	9.40795	9.50337	9.29788	9.42519	9.3379
Ctsb	8.69764	8.93395	8.92207	9.43677	9.23116	9.02886	9.62325	9.5426	9.46993	9.93001	9.88657	9.81129
Rps25	8.95486	9.17468	8.95457	10.2526	9.39812	9.29444	9.3381	9.22176	9.41712	9.89858	9.09606	9.43731
Cnbp	9.26725	9.47888	9.01627	9.65147	9.36948	9.2087	9.29284	9.16978	9.36512	9.7257	9.29744	9.46512
Rps16	9.13864	9.10267	9.1554	9.85872	9.3595	9.40256	9.28019	9.39209	9.38728	9.74944	9.29383	9.18186
Rps5	9.25108	9.36011	9.19922	9.89774	9.27617	9.18449	9.2227	9.31226	9.40143	9.63163	9.27443	9.2845
B2m	7.5213	7.89333	8.55949	9.1429	9.15522	8.97615	10.6733	10.1479	9.70288	10.6228	10.7507	9.0771
Rpl26	9.02354	9.32159	8.96751	9.98752	9.24334	9.15937	9.22435	9.18552	9.54422	9.74865	9.15692	9.58499
Cd63	8.88526	9.25343	8.91579	9.79321	9.14214	9.1489	9.23761	9.39266	9.56788	9.78162	9.41475	9.51243
Ugp2	9.16352	9.69221	9.024	9.79107	9.12291	9.37722	9.71864	8.91779	9.76035	9.51166	9.49894	8.4501
Cltc	9.63844	9.34336	9.55646	8.82035	9.37133	9.31688	9.57489	9.39933	9.2844	9.2354	9.43078	9.04334
Rpl23	9.37197	9.35718	9.38796	9.48911	9.27864	9.34606	9.27315	9.46218	9.47205	9.23326	9.12908	9.19072
Rpl9	8.85265	9.10631	8.74918	10.3359	9.33103	9.24465	9.37616	9.13653	9.38557	10.0107	9.13911	9.2933
Itgb1	9.43011	9.53005	9.36305	9.12847	9.33459	9.27546	9.26193	9.36402	9.30658	9.17057	9.15872	9.49337
Rpl28	9.18406	9.32551	9.21293	9.5903	9.27444	9.31421	9.26664	9.37798	9.41299	9.29138	9.24563	9.16386
Ptgds	9.13457	9.0401	9.25695	9.33684	9.20547	9.16919	9.31227	9.20631	9.60221	9.61152	9.38093	9.28627
Lgals1	9.09453	8.96971	9.18246	9.53493	9.48612	9.08399	9.19253	9.5751	9.30616	9.69437	8.94571	9.43751
5031439G07Rik	8.87988	8.98099	9.24356	9.16064	9.46278	9.17436	9.50858	9.148	9.37684	9.42152	9.58914	9.49308
Gstp1	9.10488	9.10282	9.15711	9.49743	9.44092	9.12468	9.29115	9.25544	9.47799	9.46508	9.29558	9.22182
Car6	9.40296	8.97719	9.20789	9.73101	9.62518	9.23431	8.9947	9.69686	8.51613	9.21712	8.8945	9.84325
Sparc	9.10534	9.07707	9.09504	9.61469	9.27925	9.13499	9.00996	9.35327	9.11281	9.43121	9.11737	9.94168
Rpl36	8.99776	9.08524	9.00174	10.1182	9.33031	9.1796	9.27166	9.15015	9.32567	9.72963	9.02462	8.95335
Hmga1	8.97571	9.21754	8.92971	9.26961	9.38216	9.08652	9.16577	9.54458	9.16136	9.39833	9.34725	9.51985
Rpl14	9.11056	9.16715	9.04293	9.44789	9.21889	9.28536	9.13863	9.19179	9.22331	9.53559	9.17558	9.33108
Rps11	8.87664	8.96954	8.88201	9.92007	9.31706	9.196	9.16675	9.03705	9.16444	9.77915	9.17581	9.34288
Tmbim6	9.18595	9.28898	9.13877	9.16883	9.08085	9.17125	9.26526	9.44516	9.31005	9.22975	9.32599	9.18009
H2az1	8.98711	9.25985	9.01909	9.70689	9.16004	9.21668	8.99539	9.0656	9.2531	9.51063	9.14313	9.39491
Rpl31	9.07125	9.14563	9.13303	9.53983	9.15656	9.08896	9.04603	9.26402	9.3483	9.51918	9.12157	9.26618
Sox10	9.40471	9.51643	9.46394	8.75109	9.38456	9.20878	9.29475	9.62489	9.24513	8.87976	9.0711	8.8166
Rps27a	9.05637	9.20712	8.9332	9.54227	9.11672	9.11557	9.1088	9.17178	9.44143	9.6014	9.06688	9.25463
Sec61a1	9.32757	9.34593	9.27906	9.12657	9.24989	9.17641	9.02466	8.8796	9.24047	9.05745	9.31449	9.54466
Lamp1	9.05621	9.31177	9.08511	9.26148	9.14268	9.08713	9.03437	9.0786	9.26275	9.10416	9.17985	9.54088
H3f3a	9.02028	9.24946	9.02213	9.63028	9.05043	9.11267	9.24193	9.14879	9.22493	9.40667	9.06444	8.90278
Set	8.99344	9.37037	8.94806	9.09834	9.29846	9.07805	9.04442	9.14913	9.28398	9.2122	9.1658	9.34288
Vcp	9.10918	9.34143	9.10192	8.65688	9.23954	9.1724	9.18419	9.24828	9.36979	9.04579	9.31794	9.16997
Cdk2	8.82415	9.15723	8.8217	9.29881	9.09561	9.34889	9.38715	9.05996	9.52508	9.25468	9.16436	8.90523
Sort1	9.2984	9.51791	9.39972	8.94256	9.10412	9.25383	9.1912	9.00181	9.13415	8.74742	9.11527	9.0734
Flna	9.17529	9.32433	9.16984	8.63339	9.2519	9.22525	9.23679	9.16274	9.19319	9.11696	9.30278	8.97498
Pfkl	9.34304	9.3499	9.44346	8.83587	9.34404	9.21205	9.28653	9.34243	9.24774	8.88653	9.21854	8.23929
Rps23	9.2264	9.10221	8.96593	9.46527	9.30247	9.13995	9.2093	9.01824	9.16228	9.25857	8.81875	9.058
Pcbp2	9.26766	9.32264	9.09348	9.09488	9.08902	9.20597	9.17982	9.12163	9.22758	8.98066	9.03488	9.0688
Cd44	8.86415	9.14813	8.85651	9.25031	9.11548	9.04947	9.18431	9.20076	9.22552	9.2683	9.24495	9.2349
Rpl11	9.01325	9.16074	8.93382	9.77782	9.1181	9.08015	8.9987	9.01353	9.2019	9.36294	8.96302	8.99291
Atp2a2	9.23458	9.13675	9.21855	8.55931	9.20832	9.11361	9.18273	9.06356	9.03055	9.18009	9.20894	9.47511
Mlana	8.70131	9.13809	8.78327	9.5512	8.76328	9.1223	9.11543	8.82871	9.45267	9.44249	9.24007	9.3945
Fam120a	8.93786	9.22496	9.02716	8.80211	9.13426	9.15929	9.27383	9.00206	9.21428	9.14016	9.35073	9.24457
Ywhaz	9.05987	9.15782	9.02517	8.95576	9.28393	9.00602	9.17666	9.14902	9.13337	9.13871	9.15427	9.15605
Myo5a	9.01734	8.93053	9.17216	8.83836	9.13644	9.25631	9.39472	8.84499	9.07945	9.14184	9.45673	9.09546
Ptbp1	9.21532	9.21726	9.09515	8.87	9.2346	9.15489	9.05109	9.01874	9.02463	9.01168	9.16328	9.2663
Rpl35	8.65267	8.78815	8.70524	9.8778	9.13153	9.05518	9.24751	8.94409	9.22449	9.58334	8.92818	9.09546
Rps17	9.0237	9.08047	8.9909	9.42324	9.14471	9.07761	9.02479	9.09289	9.26002	9.26322	8.84544	8.99359
Tpm3	8.95333	9.14533	8.89626	9.15173	9.25391	9.05527	8.98555	9.14086	8.98167	9.15824	9.18139	9.2956
Hspa9	9.50618	9.3364	9.19684	8.72228	8.98155	8.98244	9.13236	9.19168	9.14104	9.01418	8.95626	8.94723
Trpm1	8.61859	9.47712	8.56673	9.55271	8.34727	9.29685	9.74567	8.25937	9.77149	9.31752	9.80418	8.29358
Rpl17	8.48995	8.67724	8.49989	10.1026	9.14241	8.9873	9.28563	8.82758	9.22139	9.80652	8.88508	8.95265
Pakap	9.06225	9.16961	9.03518	8.56313	9.18826	9.07752	9.51418	9.26329	9.17805	9.18606	9.23324	8.3923
Ssr3	9.15834	9.08201	9.07972	9.40847	9.05389	9.0225	8.89751	8.84066	8.87283	9.1682	8.87721	9.40083
Hdlbp	9.39543	9.17641	9.27857	8.7488	9.22325	9.07348	9.18891	8.89263	8.88984	8.88264	9.06714	8.95474
Prkar1a	9.09701	9.178	9.03425	9.10083	9.03257	9.00187	9.06392	9.14074	9.15162	9.08488	9.03488	8.83736
Rps15a	8.62911	8.88143	8.73153	9.8025	9.01404	8.92086	8.94019	8.95667	9.22832	9.54344	8.93255	9.11569
Kpnb1	9.07346	9.16365	9.01686	8.67426	9.25966	9.03826	8.92808	8.89276	9.05662	9.02231	9.21808	9.33991
Nckap5l	8.9292	9.31138	8.7841	8.96565	8.93665	9.19034	9.37542	9.1652	9.45644	8.87846	9.05956	8.62514
Fasn	9.24173	8.85569	9.63478	8.32465	9.28466	9.10676	9.0388	8.81268	9.10898	8.75106	9.39018	9.06418
Aco2	9.20028	9.10191	9.17827	8.97789	9.04682	8.98337	9.02507	8.95318	8.98289	9.00044	9.00376	9.10148
Chd4	9.26615	9.05258	9.26676	8.40181	9.25365	9.07638	9.03813	9.19387	9.04698	8.86467	8.99772	9.04268
Naca	8.75974	9.11009	8.61873	9.64049	9.04711	8.85919	9.07089	8.87619	9.21473	9.35153	8.8606	9.08016
Sptan1	9.12959	8.95514	9.14781	8.39912	9.11686	9.16738	9.2382	9.23471	9.12123	8.88696	9.12305	8.96069
Rab7	8.98661	9.05211	8.97091	9.01604	8.97412	8.96871	9.09971	9.08405	9.08287	9.08714	9.12268	8.87169
Akr1a1	9.05796	9.14341	8.92583	9.39501	8.81109	8.95827	9.0961	9.00144	9.10498	9.05195	9.04181	8.67952
Sf3b1	9.28705	9.1499	9.16168	8.79188	9.04494	9.03871	9.08069	9.04437	9.03895	8.9048	8.95501	8.75104
Gars	9.4377	9.41449	9.09449	8.96914	8.76873	8.93776	9.04014	8.93769	9.02429	8.95156	8.92959	8.70497
Eif3a	9.20846	9.05337	9.12575	8.44859	9.10718	9.12383	9.18249	9.09207	9.06108	8.87035	9.04037	8.88819
Tfrc	9.15374	8.96871	9.19321	9.09529	9.15736	8.93428	8.84404	9.02491	8.60397	8.9859	8.95778	9.2761
Fkbp9	9.16249	9.13986	9.03077	9.08681	9.08184	8.96037	8.70886	8.97961	8.78439	8.78967	8.8399	9.52182
Rps19	8.77549	8.87521	8.8151	9.54013	8.98669	8.97813	8.7802	8.93494	9.14572	9.41984	8.85393	8.96785
Ybx3	9.05526	9.34849	8.77302	9.19249	9.15105	8.83223	8.76456	8.72561	8.88817	8.87136	8.97986	9.44226
Arf1	9.01751	9.03374	8.95849	9.06005	9.02392	8.86631	8.87711	8.98924	9.01648	9.08313	9.0422	9.05386
Rpl5	8.76111	8.92727	8.71686	9.66863	9.06379	8.89354	9.19265	8.76818	8.94421	9.4238	8.71986	8.82815
Ywhaq	8.84346	8.96704	8.83642	9.30889	8.97427	8.87168	8.85444	8.91978	8.90868	9.29399	8.91429	9.0558
Slc24a5	8.6274	9.09261	8.61237	9.19275	8.74877	9.01913	9.12682	8.53929	9.2355	9.05016	9.23026	9.13025
Cox4i1	8.65519	8.89728	8.68321	9.54308	8.93509	8.82421	8.91587	8.9146	9.16919	9.39379	8.73462	8.93772
Acly	9.29489	9.03294	9.41004	8.63339	9.07519	9.01447	8.97718	8.90566	8.82151	8.65986	9.11997	8.62845
Eif4b	9.26009	9.1543	9.20439	8.68296	8.97564	9.02368	8.9689	9.01713	8.86263	8.72719	8.83945	8.81858
Lmna	8.8942	8.96085	8.86893	8.56833	9.23256	8.75258	8.98944	9.42495	8.8007	8.97472	9.04792	8.96303
Hdgf	8.94218	9.12752	8.82412	8.90412	9.00528	8.93776	8.90856	9.1614	8.92963	8.85824	8.82255	8.97511
Bnip3	9.29044	9.03517	9.09815	9.70225	9.04653	8.79913	9.21014	9.11967	8.80347	9.21724	8.56662	7.47536
Lbh	9.08489	9.11145	9.10844	9.05179	8.80477	9.10133	8.83388	9.17367	8.88612	8.74203	8.80499	8.62706
Cpe	8.92955	8.89938	9.00364	8.58542	8.99376	8.83306	8.72778	9.36878	8.99797	9.00799	8.71185	9.19542
Ccnd2	9.31192	8.83554	9.43952	8.58443	9.04725	8.94882	9.16908	8.93376	8.5951	8.81873	8.97003	8.50473
Atp13a2	8.8806	8.94518	8.9217	8.51935	8.96296	8.99047	8.95902	8.84332	8.82599	8.79366	9.07302	9.32947
Dst	8.98058	8.46954	9.31456	8.3971	9.11741	9.07673	9.0341	8.95111	8.67581	8.86116	8.87589	9.28495
Hspa4	8.85503	9.05651	8.78355	8.57193	8.97351	8.87198	8.91923	8.8482	9.11249	8.88351	9.13557	8.99143
Got2	8.90837	8.99694	8.81577	8.70966	9.00602	8.83067	8.89039	8.79516	8.97538	8.83847	8.95861	9.05632
Ptprs	8.78454	8.8654	8.95873	8.60132	8.8567	9.19858	9.19626	8.51071	8.86981	8.89726	9.0938	8.94542
Btf3	8.69825	8.92246	8.55723	9.52291	8.79688	8.72016	8.85596	8.88708	8.97011	9.14977	8.68472	8.97566
Bzw1	8.81928	8.94924	8.80982	9.03077	8.95281	8.77555	8.82364	8.80351	8.77516	9.12136	8.86606	9.00247
Dync1h1	8.96981	8.60956	9.0511	8.03677	8.8431	9.02086	9.08757	9.14845	9.0858	8.79075	9.09982	8.98098
Mgat4b	8.59643	9.06558	8.60926	8.85697	8.77171	8.80475	8.82271	9.01192	9.12944	8.8597	9.02541	9.02681
Anp32b	8.88455	9.21403	8.71773	8.75144	8.97259	8.90968	8.6595	8.87442	9.14026	8.73071	8.79574	8.91424
Eif5	8.87646	8.84955	8.74606	9.04304	8.81687	8.88646	8.81334	8.67861	8.75408	9.16014	8.87706	9.04451
Pdia6	8.77162	9.0477	8.65873	8.92737	8.79825	8.76558	8.59276	8.34219	9.19545	8.90125	9.0354	9.49994
Rplp2	8.64062	8.78285	8.68262	9.26493	8.86838	8.8371	8.7316	8.92229	9.09937	9.01524	8.89594	8.78279
Eif4h	8.92781	9.00509	8.79688	8.70512	8.96266	8.85899	8.78788	8.96735	8.92764	8.79688	8.87414	8.89529
Tcp1	8.77394	8.88885	8.72234	9.04189	8.923	8.7709	8.75202	8.87141	8.86642	9.02258	8.82936	9.00086
Phb2	8.64613	8.84792	8.59548	9.05906	9.02127	8.70493	8.64565	8.71831	8.89022	9.18115	8.94682	9.07889
Rac1	8.90837	9.11718	8.92132	8.84018	8.84077	8.85316	8.74382	8.90941	8.8577	8.70259	8.8429	8.77637
Fbln5	8.76987	9.19478	8.79811	8.61957	8.77992	8.80898	9.00723	8.79082	9.0905	8.69457	8.96096	8.76313
Eif3c	9.15329	9.06683	8.98082	8.46608	8.84627	8.82525	8.95703	8.96825	8.80839	8.65159	8.85051	8.63158
Ctsz	8.63146	8.82986	8.72508	8.86707	8.8705	8.8196	8.84205	8.74907	8.88332	8.80405	9.0095	9.09634
Actn4	8.75602	8.84265	8.76842	8.33549	9.0223	8.79359	8.89529	9.0638	8.73226	8.89598	8.93704	9.07366
Mdh2	8.77142	8.89728	8.81968	8.83521	8.92379	8.72196	8.66645	8.78835	8.85084	8.90636	8.81402	9.07353
Cct5	8.70151	8.93634	8.50727	9.13429	8.88336	8.67141	8.74283	8.63004	8.93972	8.99579	8.91001	8.97416
Eif1	9.14014	9.10069	8.86449	9.05007	8.64859	8.83855	8.78931	8.73513	9.05264	8.60887	8.5814	8.59236
Ago2	8.82881	8.80131	8.93357	8.31754	8.78183	8.94421	9.26274	8.74009	8.88743	8.85721	9.09581	8.41586
Odc1	8.79259	9.0347	8.54359	9.19831	8.90028	8.46957	8.55745	8.60734	8.70864	9.13931	8.66505	9.23786
Cct8	8.78262	8.95716	8.69676	8.70712	8.90012	8.75565	8.67838	8.85182	8.92655	8.85236	8.75417	8.95806
Prelid1	8.82471	9.11628	8.80656	9.03106	8.90108	8.6794	8.55876	8.87524	8.8732	8.56124	8.6463	8.84785
Myh9	8.84916	8.78398	8.86854	7.97781	8.99676	8.85878	9.03961	9.21896	8.89966	8.80329	8.86724	8.52616
Top2a	8.95879	9.00606	8.84782	8.59506	8.91288	8.87652	8.90032	8.62777	8.74424	8.68601	8.87194	8.64882
Slc7a5	9.24047	8.99104	8.96179	8.07018	8.71929	8.70697	9.07377	8.86935	8.63114	8.82893	8.70281	8.86846
H2-D1	7.0319	7.15203	7.89312	8.32441	8.69752	8.32248	10.2228	9.73313	9.07226	10.2239	10.4741	8.47313
Srsf2	8.64444	8.88408	8.60129	8.84778	8.91589	8.77274	8.72245	8.61914	8.9451	8.80374	8.82133	9.0117
Eif3b	8.78089	8.96587	8.71671	8.39755	9.03709	8.77079	8.78148	8.72288	8.83103	8.73551	8.90055	8.89818
Ddx3x	9.05031	9.03549	8.95776	8.33784	8.92127	8.84103	8.83202	8.50401	8.58549	8.68304	8.77596	8.99669
H1f0	9.21774	9.23289	8.8221	9.1899	8.57404	8.92535	8.65373	9.04643	8.85466	8.47405	8.17979	8.30058
Cct2	8.7832	8.9295	8.70159	8.83454	8.77974	8.72554	8.67803	8.79905	8.87696	8.74806	8.75592	8.85826
Rps20	8.68493	8.78038	8.71614	9.04835	8.79309	8.7081	8.69838	8.73994	8.99002	8.86525	8.68004	8.74865
Mrfap1	8.67336	9.01755	8.69794	8.65048	8.8324	8.68102	8.67821	8.73633	9.07488	8.6764	8.84589	8.83871
Cct3	8.50938	8.83188	8.45915	9.20141	8.88999	8.63364	8.52661	8.64246	8.73806	9.01023	8.82179	9.08079
Ddb1	8.86451	8.84738	8.8213	8.61513	8.8461	8.77274	8.85535	8.80294	8.70927	8.74885	8.79218	8.65566
Plxnb2	9.16898	8.91209	9.07499	8.27286	8.88158	8.80856	8.6885	8.78545	8.38695	8.42623	8.75957	9.09042
Rpl24	8.55446	8.56218	8.53804	9.33989	8.815	8.63721	8.74989	8.74489	8.79615	9.09225	8.52189	8.89919
Slc38a1	8.8714	8.75102	8.86945	8.39552	8.85108	8.84968	8.93314	8.66081	8.63447	8.64516	8.67702	9.07799
Ppp1cc	8.72312	8.88408	8.71019	9.1775	8.74449	8.68574	8.63665	8.74369	8.69955	8.92243	8.65826	8.59717
Rpl30	8.80855	8.71171	8.81672	8.86707	8.7493	8.81488	8.51413	8.98126	8.92456	8.72381	8.56734	8.66077
Hnrnpa0	9.03618	9.30294	8.84663	8.18515	8.98004	8.73257	8.55801	8.95396	8.85504	8.44839	8.71185	8.52392
G3bp1	8.66023	8.86504	8.64951	8.67054	8.79464	8.76177	8.67614	8.69466	8.84068	8.78305	8.82513	8.90106
Srsf1	8.66127	8.80897	8.71222	8.6949	8.96526	8.7953	8.61415	8.62273	8.80524	8.73838	8.77173	8.92574
Ppp2ca	8.74797	8.90218	8.72895	8.93653	8.74163	8.6448	8.66472	8.71725	8.71495	8.80845	8.77283	8.69836
2020-09-09	8.7011	8.74655	8.72981	8.46199	8.93978	8.78009	8.7802	8.93258	8.74218	8.65295	8.76952	8.77291
Mlf2	8.7074	8.88691	8.6283	8.74703	8.85819	8.68998	8.64072	8.73934	8.88183	8.67474	8.8429	8.67599
Actr3	8.6244	8.90654	8.47137	8.79905	8.62378	8.49223	8.74793	8.62061	8.84126	9.01524	8.89551	8.67076
Tpm1	8.23577	8.85696	8.19191	8.9387	8.66508	8.64811	8.73987	8.50931	9.04314	8.9178	9.09731	8.74127
Chchd2	8.52946	8.81899	8.52389	9.12644	8.69826	8.54883	8.51278	8.63988	8.88947	8.93165	8.70988	8.64745
Aebp1	8.79526	8.6183	8.67995	8.30128	8.78252	8.8433	8.82473	8.50454	8.85466	8.5589	8.85705	8.89572
Dag1	9.07942	8.74966	9.14791	8.19191	8.90396	8.81604	8.81944	8.88884	8.23426	8.46677	8.56535	8.615
Mlph	8.22873	8.37534	8.29431	8.53375	8.81398	8.79828	9.04402	9.01886	8.6017	9.06077	8.84005	8.84321
Mcm2	8.51077	8.97087	8.49972	8.65368	8.83341	8.66092	8.5567	8.54823	8.72894	8.66974	8.93564	8.74448
Mknk2	8.3655	8.74577	8.54164	8.63415	8.59378	8.79413	8.99152	8.78414	8.82463	8.56985	8.92592	8.50813
Maged1	9.03344	8.94552	8.85349	8.62053	8.79705	8.66955	8.64689	8.70361	8.64288	8.3601	8.55314	8.36084
Uba1	8.71851	8.64818	8.64405	8.33502	8.84144	8.62503	8.76845	8.81268	8.59579	8.70079	8.86841	8.61026
Chchd10	8.76443	8.66967	8.77079	8.72551	8.51961	8.44912	8.73292	8.83912	8.81663	8.82023	8.65024	8.40027
Pdia4	8.59818	8.56151	8.5086	8.67444	8.78113	8.57922	8.60005	8.10197	8.78659	8.75248	8.84977	9.26529
Nono	8.6773	8.82931	8.6442	8.48673	8.81806	8.73646	8.63186	8.62874	8.72269	8.45983	8.68772	8.7225
Atp5g3	8.54723	8.57428	8.64085	8.82487	8.7111	8.59633	8.49959	8.71526	8.79793	8.91526	8.57619	8.59681
Plxnd1	8.64634	8.88938	8.72981	8.12908	8.99916	8.63412	8.55632	8.64422	8.44428	8.49248	8.52413	9.28163
Ets1	8.8554	8.86611	8.84676	8.39665	8.72056	8.83316	8.56678	8.6365	8.54026	8.52386	8.66741	8.48239
Nckap1	8.7349	8.85768	8.73211	8.38376	8.56032	8.69033	8.73772	8.57372	8.81173	8.5961	8.76463	8.49179
Hnrnpl	8.62397	8.82305	8.49467	8.73427	8.77765	8.67222	8.53291	8.45035	8.68441	8.66957	8.73155	8.65907
Srrm2	8.84567	8.33478	8.79346	8.28118	8.83625	8.92389	8.8362	8.72515	8.43284	8.58463	8.6165	8.60408
Rpl34	8.01087	8.26617	8.16333	9.49164	8.57985	8.54541	8.74842	8.50047	8.87095	9.31218	8.49965	8.79647
Msn	8.71125	8.70272	8.64769	8.26721	8.63055	8.57228	8.81161	8.79977	8.65386	8.64956	8.81981	8.50776
Nucks1	8.71024	8.89973	8.71498	8.39979	8.64381	8.73001	8.59422	8.59909	8.75122	8.5327	8.62557	8.50757
Ckb	8.76579	8.66741	8.94732	8.62745	8.87214	8.75488	8.23895	8.80006	8.51854	8.32236	8.36773	8.79554
Sparcl1	8.58743	8.40077	8.75257	8.2802	8.85008	8.50167	8.79456	8.66382	8.69232	8.67906	8.73025	8.7264
Wdr1	8.55536	8.7317	8.63029	8.30128	8.77206	8.50636	8.71693	8.62192	8.76648	8.71413	8.85348	8.45089
Kpna2	8.5402	8.8593	8.46364	8.91186	8.77904	8.56704	8.47583	8.40165	8.64332	8.53618	8.58122	8.80388
Rpl35a	8.3793	8.42649	8.23111	9.30985	8.63402	8.59425	8.82644	8.363	8.74547	9.14557	8.29848	8.60373
Mprip	8.7654	8.79531	8.73882	8.50752	8.62552	8.73201	8.61541	8.65588	8.53337	8.41551	8.6026	8.55681
Prpf8	8.8499	8.6149	8.84399	8.0008	8.76926	8.69753	8.72495	8.78326	8.41977	8.46041	8.65758	8.70579
Pebp1	8.53175	8.67479	8.60004	9.01619	8.52502	8.59596	8.54731	8.53929	8.70378	8.71866	8.54415	8.50093
Gpx1	7.91233	8.30366	8.00654	9.35225	8.57905	8.27665	8.75382	8.37038	8.66803	9.47897	8.8402	8.88004
Tmpo	8.7349	8.87201	8.59139	8.55871	8.64553	8.64457	8.53975	8.47491	8.57744	8.64651	8.52151	8.5879
Aars	9.00288	9.09215	8.74379	8.25931	8.38599	8.66477	8.76066	8.50772	8.80347	8.34135	8.60401	8.22303
Srsf3	8.32803	8.57143	8.40543	9.11088	8.68549	8.56417	8.39498	8.34712	8.77496	8.7932	8.62226	8.7817
Mtpn	8.75681	8.70091	8.69486	8.57869	8.59061	8.48933	8.6849	8.63101	8.4336	8.72011	8.59817	8.44675
Tomm20	8.33066	8.54439	8.2303	9.19106	8.59537	8.49459	8.64177	8.35459	8.60985	9.08175	8.3554	8.77998
Rps13	8.30491	8.38936	8.3881	8.96565	8.4704	8.46126	8.46589	8.72333	8.78179	9.05413	8.53343	8.59735
Bhlhe40	8.79336	8.56813	8.50056	8.23736	8.83876	8.51324	8.68285	9.08665	8.71201	8.66623	8.5312	8.00254
Laptm4a	8.32697	8.50055	8.33237	8.95208	8.42904	8.384	8.62026	8.55882	8.58251	9.03986	8.78238	8.60072
Fau	8.30999	8.45462	8.37826	9.1996	8.59517	8.36489	8.54145	8.53842	8.73102	9.00349	8.55351	8.4273
Tkt	8.77607	8.78	8.61082	8.4607	8.71856	8.52986	8.55051	8.61276	8.60736	8.31448	8.53436	8.46127
Hif1a	8.89277	8.57625	8.83402	8.29983	8.67335	8.57712	8.73756	8.60784	8.45412	8.4441	8.52916	8.30646
H2-K1	7.53141	7.01473	7.89772	7.9223	8.34633	8.189	10.0591	9.37334	8.75856	9.97253	10.2029	7.60647
Tubb4b	8.50449	8.62826	8.39227	8.83803	8.70561	8.44532	8.43261	8.38754	8.50258	8.65767	8.5668	8.71531
Ube2s	8.55851	8.74519	8.45725	8.82119	8.67073	8.52691	8.41742	8.33445	8.69785	8.47882	8.30784	8.69305
Mgat5	8.02655	8.56571	8.15567	7.94032	8.65544	8.60851	8.78963	8.51616	8.81663	8.8349	8.73042	9.06083
Tmed2	8.53358	8.58018	8.47069	8.67815	8.51083	8.43496	8.38973	8.28511	8.5772	8.72735	8.44942	9.04059
Selenof	8.15366	8.40546	8.08438	9.82859	8.50241	8.44043	8.34359	8.20538	8.43539	8.99192	8.38325	8.859
Copg1	8.80363	8.57077	8.70597	8.22853	8.75374	8.56154	8.6044	8.52907	8.39431	8.43647	8.57673	8.41485
Hnrnpm	8.55108	8.82158	8.51377	8.0973	8.70707	8.58836	8.39665	8.70746	8.77738	8.37348	8.50534	8.46069
Ube2d3	8.36576	8.43882	8.3318	9.05265	8.46954	8.46422	8.52681	8.2814	8.45688	8.89798	8.61211	8.60213
Sfpq	8.42808	8.62699	8.50409	8.25186	8.79429	8.61178	8.41969	8.56391	8.67947	8.45111	8.5932	8.55992
Fdps	8.62483	8.73405	8.68617	8.57133	8.52336	8.56667	8.43953	8.20343	8.63491	8.28774	8.75576	8.44221
Atp5c1	8.34219	8.45985	8.32745	9.0251	8.58185	8.34318	8.60458	8.31242	8.58297	8.91653	8.42764	8.53657
Oaz1	8.22873	8.53586	8.28048	9.24682	8.58025	8.41332	8.29301	8.35655	8.68805	8.79213	8.49509	8.48815
Pgm1	8.83939	8.79888	8.81347	8.32985	8.75781	8.5179	8.63824	8.61947	8.46813	8.27485	8.4968	7.83848
Atf4	9.11377	9.14415	8.66324	8.55185	7.97754	8.68125	8.76861	7.92157	8.81839	8.3029	8.23785	8.1876
Fus	8.83086	8.67724	8.65541	8.10999	8.72002	8.82692	8.51606	8.45456	8.59419	8.2812	8.36273	8.29621
Nap1l1	8.34558	8.78247	8.21973	8.66737	8.54319	8.46783	8.37324	8.2884	8.7078	8.58339	8.46817	8.81217
Anapc5	8.596	8.82287	8.49568	8.53293	8.52648	8.51971	8.3615	8.35439	8.55393	8.37635	8.41822	8.69454
Ddx17	8.65077	8.29624	8.82184	8.43156	8.48051	8.70923	8.78324	8.32828	8.5348	8.49493	8.5823	8.13497
Calm2	8.40027	8.62403	8.37954	8.87	8.52274	8.46019	8.36321	8.5322	8.58664	8.60678	8.37541	8.51811
Sdhb	8.26718	8.46341	8.37862	8.82905	8.50936	8.34566	8.34598	8.46749	8.63912	8.77485	8.56788	8.64522
Gtf2i	8.56233	8.63668	8.61361	8.19579	8.55626	8.62563	8.55163	8.60603	8.57559	8.33125	8.53213	8.41445
Nme2	8.00197	8.31735	8.03443	9.36599	8.50894	8.36144	8.51683	8.24146	8.46962	9.18897	8.46293	8.70133
Ogdh	8.36986	8.52706	8.40435	8.20662	8.81738	8.50206	8.50698	8.2671	8.58343	8.48396	8.72669	8.77229
Aplp2	8.7857	8.46624	8.7673	8.28288	8.49437	8.60121	8.52661	8.56222	8.34037	8.18798	8.40267	8.70497
Hnrnph1	8.47407	8.44985	8.4174	8.44359	8.55096	8.7891	8.49784	8.72105	8.64398	8.42306	8.29433	8.39884
Rpl37	8.53084	8.41968	8.48451	8.88644	8.69549	8.54883	8.53272	8.41149	8.60284	8.40772	8.13478	8.39353
Cycs	8.136	8.43231	8.20103	8.93126	8.54667	8.33617	8.34576	8.25601	8.70294	8.81617	8.55442	8.76123
Hk1	8.78819	8.45653	8.70408	7.97781	8.78009	8.43428	8.60077	8.86344	8.18481	8.49361	8.40551	8.32438
Spg21	8.58633	8.635	8.53755	8.87727	8.35571	8.42274	8.50154	8.33743	8.52238	8.6172	8.46817	8.11004
Ewsr1	8.7007	8.82287	8.44351	8.14203	8.48778	8.69947	8.63168	8.29597	8.78339	8.25651	8.34508	8.30581
Morf4l1	8.4916	8.53383	8.36595	8.74527	8.43369	8.4441	8.48215	8.48837	8.46688	8.67624	8.39044	8.37355
Hmgn1	8.51239	8.76068	8.4083	8.57968	8.56699	8.49302	8.30532	8.23295	8.56025	8.44995	8.28378	8.72234
Dbi	8.1596	8.40743	8.2914	9.05265	8.52979	8.4697	8.29615	8.32147	8.76141	8.63493	8.26268	8.62897
Anxa2	8.45658	8.44938	8.28575	8.60737	8.50199	8.27787	8.33619	8.84402	8.55487	8.62187	8.49395	8.37996
Pfkp	8.65077	8.46151	8.56335	8.04943	8.63055	8.36747	8.74168	8.78777	8.53575	8.57378	8.62592	7.8182
Cbx3	8.37037	8.65441	8.36152	8.471	8.58265	8.45169	8.33619	8.55131	8.64838	8.46754	8.25797	8.53138
Cdc42bpb	8.84364	8.63184	8.7719	7.84918	8.53021	8.58194	8.47682	8.57876	8.37637	8.28229	8.48073	8.21472
Srebf2	8.89259	8.76913	8.87788	8.08506	8.56113	8.51583	8.35806	8.29883	8.3998	7.89819	8.41118	8.5471
Rpn2	8.55896	8.59452	8.43404	8.30224	8.47191	8.44043	8.37961	8.30229	8.41461	8.33336	8.57871	8.79694
Tln1	8.60277	8.49732	8.58062	7.62544	8.53	8.58503	8.61954	8.7642	8.67149	8.37451	8.62052	8.09376
Rrm2	8.41598	8.5562	8.31471	8.37602	8.58524	8.40957	8.22063	8.31987	8.42105	8.60573	8.48783	8.77904
Cct6a	8.2776	8.47448	8.17453	8.69234	8.51961	8.349	8.41928	8.3408	8.46239	8.78089	8.40531	8.56374
Ppp1ca	8.25254	8.47824	8.12199	9.16949	8.48479	8.29334	8.38045	8.29903	8.28829	8.80709	8.41842	8.45187
Cox5b	8.33932	8.23491	8.40973	8.75548	8.55829	8.48061	8.50387	8.46404	8.57397	8.73039	8.23854	8.12908
Csde1	8.43397	8.51112	8.36835	8.55145	8.4161	8.32646	8.48255	8.37174	8.38827	8.53545	8.38921	8.55827
Tmed10	8.46115	8.50584	8.32764	8.46886	8.37266	8.47716	8.4605	8.33902	8.3909	8.45053	8.40186	8.6447
Arhgdib	8.02102	8.43183	8.08056	8.885	8.43789	8.28502	8.45709	8.44502	8.42414	8.69145	8.6247	8.4677
Psmd2	8.50075	8.52252	8.43122	8.24037	8.50536	8.32971	8.32062	8.4939	8.43895	8.38594	8.5706	8.47313
Eif3h	8.32142	8.37207	8.19565	9.27672	8.50557	8.24016	8.42113	8.29086	8.24039	8.77655	8.2756	8.29511
Hint1	8.02947	8.15012	7.97642	9.23125	8.56639	8.2879	8.37749	8.18898	8.53978	8.99552	8.42143	8.43249
Tspan10	7.93847	8.45248	8.19565	8.49243	8.30241	8.60231	8.71575	8.21557	8.85427	8.40752	8.66725	8.33869
Idh2	8.42414	8.58824	8.38373	8.57591	8.43303	8.39867	8.30354	8.1493	8.4862	8.46041	8.42344	8.55297
Syne2	8.43935	8.05941	8.57025	7.81859	8.47234	8.59498	8.56993	8.43504	8.57026	8.40592	8.55753	8.67026
Scpep1	8.3513	8.38936	8.29953	8.32465	8.27153	8.31224	8.55351	8.35086	8.48176	8.52496	8.57817	8.66247
Hk2	8.69233	8.44531	8.54945	7.82496	8.7111	8.44695	8.86703	8.83646	8.44276	8.28927	8.47784	7.49189
Sars	8.91646	8.82471	8.57696	8.52183	8.07866	8.35899	8.6224	8.39461	8.41796	8.27067	8.25032	7.82003
Strap	8.42019	8.59516	8.31375	8.55589	8.4359	8.26222	8.21258	8.39003	8.40032	8.51496	8.40166	8.5198
Cct4	8.42734	8.53631	8.21973	8.5148	8.35501	8.31015	8.44379	8.32107	8.4736	8.68634	8.39064	8.29116
Slc38a10	8.66148	8.47096	8.6286	8.21685	8.53021	8.5246	8.44924	8.38005	8.27411	8.14154	8.22459	8.443
Calm3	8.18136	8.61767	8.31471	8.55266	8.56861	8.44478	8.30777	8.20473	8.50646	8.2988	8.56897	8.3558
Anxa5	8.01677	8.2829	8.19772	8.49622	8.48457	8.34347	8.36321	8.5634	8.46464	8.5047	8.56825	8.61921
Rhoa	8.15901	8.45557	8.09932	8.66251	8.42325	8.2838	8.38066	8.30614	8.48472	8.63886	8.54396	8.4501
Hspe1	7.80164	8.25227	7.8844	9.28026	8.58325	8.30147	8.43505	7.86047	8.67904	8.91639	8.26625	8.61851
Fam53b	8.01546	8.5865	8.20227	8.18071	8.20281	8.56742	8.72728	8.3108	8.78439	8.38289	8.69321	8.18665
Mpzl1	8.32222	8.52411	8.40489	8.60795	8.32621	8.43113	8.30354	8.59063	8.39168	8.4001	8.23124	8.28346
Pcna	8.15723	8.59019	8.15567	8.70984	8.36804	8.33235	8.13519	8.27623	8.44428	8.64295	8.47746	8.43666
Mtch1	8.36832	8.59754	8.48196	8.58186	8.42303	8.34726	8.30376	8.31866	8.48225	8.22935	8.30697	8.28213
Snd1	8.62397	8.62678	8.48859	8.08059	8.35781	8.45696	8.4615	8.32348	8.42824	8.15925	8.51945	8.14643
Eprs	8.81534	8.59775	8.57009	7.91728	8.3522	8.44451	8.69651	8.25895	8.33218	8.24445	8.39023	8.03333
Tcf25	8.48924	8.48967	8.39426	8.15619	8.42948	8.42811	8.45769	8.34948	8.43895	8.41132	8.30262	8.28058
Selenot	8.27075	8.39458	8.2797	8.61938	8.38736	8.20882	8.34554	8.22289	8.31761	8.58357	8.3061	8.65447
Prrc2b	8.55739	8.37283	8.62105	7.70029	8.50684	8.4422	8.59111	8.38907	8.18602	8.27287	8.43976	8.39271
Mtmr2	8.44203	8.42504	8.44316	8.60892	8.33642	8.29485	8.50988	8.32588	8.1708	8.53178	8.31519	8.06707
Eif2s2	8.59468	8.60678	8.31318	8.63167	8.20281	8.27649	8.43831	8.18722	8.31429	8.5257	8.11483	8.21957
Atp5pb	8.13691	8.3296	8.11915	8.79325	8.27475	8.15169	8.279	8.27313	8.48669	8.70128	8.30675	8.56301
Tinagl1	8.32195	7.79258	8.58585	7.96239	8.62086	8.18037	8.45909	8.7516	8.02235	8.62721	8.72458	8.36084
Ndufa4	8.06249	8.25692	8.18649	9.00309	8.26583	8.26238	8.2522	8.16548	8.55252	8.73327	8.21143	8.40981
Szrd1	8.28059	8.38087	8.27046	8.51417	8.46587	8.26915	8.24478	8.26418	8.37584	8.47482	8.49433	8.30101
mt-Nd6	8.49018	8.24155	8.48808	8.10641	8.69438	8.60827	8.30487	8.66808	9.03929	8.20098	7.14949	8.28346
Atp5o	8.00297	8.29119	7.99966	8.77553	8.3231	8.17022	8.27354	8.22975	8.53765	8.76285	8.27294	8.53249
Rad21	8.51957	8.59084	8.35948	8.37419	8.33144	8.38287	8.23709	8.28181	8.29813	8.20006	8.1767	8.41606
Cdk4	8.19588	8.53946	8.12374	8.805	8.31111	8.30626	8.18909	8.10919	8.48595	8.38939	8.20003	8.50643
Oat	8.34376	8.55398	8.29644	8.27825	8.20203	8.36776	8.37515	8.07818	8.66477	8.27989	8.48649	8.21217
Rad23b	8.42931	8.49847	8.33501	8.22955	8.3992	8.27527	8.41433	8.2291	8.26612	8.34491	8.414	8.28853
Gdi2	8.36653	8.48315	8.27165	8.46307	8.32716	8.19483	8.25728	8.3862	8.34905	8.35574	8.32487	8.31296
Csnk1a1	8.55469	8.48058	8.42681	8.20173	8.29316	8.29259	8.45789	8.3112	8.29841	8.25183	8.35624	8.16356
Slc3a2	8.61794	8.6217	8.3689	7.99843	8.17713	8.30582	8.46549	8.35987	8.56631	8.14659	8.15469	8.25063
Immt	8.39977	8.44435	8.26553	8.35161	8.40598	8.15103	8.23895	8.29045	8.26009	8.40993	8.36189	8.41041
Gnb2	8.40902	8.54952	8.2576	8.2361	8.34044	8.24578	8.13894	8.4731	8.39614	8.23365	8.35183	8.32653
Atrx	8.56971	8.28745	8.62399	8.02109	8.3967	8.53893	8.49647	8.40184	8.17386	8.2458	8.18853	7.99877
Ywhag	8.33145	8.27645	8.37698	8.04742	8.47922	8.1958	8.41887	8.28696	8.28546	8.36691	8.60895	8.26635
Atp6v1e1	8.22108	8.42771	8.20165	8.57869	8.30628	8.22457	8.29391	8.43003	8.53408	8.43391	8.25662	8.02754
Fkbp1a	8.11232	8.37786	8.11871	8.41254	8.38026	8.31253	8.13969	8.35557	8.50937	8.32151	8.32487	8.49408
App	8.35338	8.29252	8.41989	7.88748	8.28116	8.23922	8.52048	8.42705	8.20078	8.3424	8.5187	8.36689
Lonp1	8.69968	8.46033	8.54082	8.04081	8.36386	8.30597	8.39665	8.3485	8.30176	8.16258	8.27737	7.94255
Srsf6	8.29307	8.30472	8.14109	8.41809	8.27747	8.49078	8.23872	8.22181	8.52812	8.34804	8.16334	8.38491
Copa	8.64993	8.42674	8.55723	7.97299	8.39193	8.31506	8.33598	8.33346	8.16374	8.1372	8.29761	8.20519
Glrb	8.29037	8.48804	8.40417	8.61609	8.19969	8.40608	8.15065	8.05013	8.28207	8.2505	8.12791	8.48585
Serp1	8.41026	8.46317	8.2912	8.57471	8.06529	8.17645	8.33924	7.78071	8.28094	8.54876	8.44253	8.35874
Serf2	8.12117	8.28021	8.10971	8.85041	8.2596	8.30716	8.24501	8.15944	8.54758	8.47099	8.26313	8.05315
Wsb2	8.14651	8.42236	8.26513	8.4918	8.2283	8.20994	8.15437	8.14794	8.47756	8.21638	8.37106	8.52261
Atp5g2	8.20653	8.39359	8.16841	8.69105	8.15743	8.28183	8.35677	8.24696	8.46489	8.37615	8.17266	8.12736
Trip12	8.45513	8.30366	8.42167	7.82127	8.36757	8.32159	8.4853	8.3483	8.21599	8.30397	8.42744	8.1674
Rrm1	8.25365	8.56306	8.19399	8.22803	8.48286	8.24282	8.13544	8.11684	8.30873	8.2897	8.2862	8.48604
2610507B11Rik	8.17815	8.20663	8.28165	7.86358	8.39807	8.21918	8.44379	8.21535	8.18269	8.40231	8.60719	8.58557
Tcf12	8.54791	8.30208	8.54864	8.04627	8.31472	8.37205	8.50271	8.26876	8.11241	8.29664	8.28994	7.96365
Ap2m1	8.14231	8.31446	8.19855	8.38852	8.307	8.22947	8.1772	8.25412	8.38114	8.34407	8.43817	8.38038
Rpl37a	8.0647	8.35508	8.15972	8.80126	8.19656	8.18624	7.97038	8.32488	8.61863	8.39324	8.14331	8.3355
Rps27	7.92354	7.99178	7.99895	9.09154	8.19369	8.13292	8.14394	8.25076	8.39588	8.72333	8.1126	8.49465
Atp6v1b2	8.29739	8.44387	8.23334	8.10035	8.10642	8.16132	8.33598	8.47346	8.6269	8.4171	8.31821	7.92199
Rangap1	8.19443	8.5086	8.17979	8.08339	8.28165	8.32764	8.1944	8.01036	8.58985	8.20836	8.49528	8.35748
Tm9sf3	8.3275	8.4094	8.39589	8.08618	8.24125	8.34886	8.19728	8.29515	8.28801	8.07779	8.26424	8.48681
Tle5	8.12087	8.45724	8.27911	8.27433	8.39375	8.22204	8.19416	8.28037	8.48988	8.15687	8.27427	8.22877
Cdv3	8.3238	8.46341	8.26908	8.02459	8.49076	8.24407	8.15511	8.11105	8.23572	8.21088	8.32658	8.49542
Ppp2r1a	8.32618	8.44866	8.23496	8.04283	8.31279	8.21042	8.21614	8.37445	8.388	8.28513	8.32079	8.16812
Trim28	8.24697	8.53946	8.21482	7.96906	8.43192	8.32823	8.09501	8.23997	8.38061	8.07527	8.41218	8.37002
Gaa	8.35519	8.42601	8.26315	7.7575	8.27944	8.27022	8.56361	8.17928	8.31179	8.13575	8.58122	8.16668
Plagl1	8.39399	8.2659	8.35782	7.74942	8.22983	8.39516	8.51837	8.63795	8.3822	8.30009	8.25528	7.78614
Tom1l2	8.4812	8.40226	8.63076	8.05543	8.39829	8.46596	8.22747	8.47238	8.12099	7.96258	8.1729	7.86322
Tuba1c	8.11048	8.26074	7.99848	8.72013	8.2956	8.02346	8.0963	8.23572	8.2145	8.53856	8.23032	8.52392
Cox8a	8.06502	8.22349	8.1499	8.81143	8.20566	8.15635	8.10452	8.22031	8.38114	8.41571	8.13746	8.34675
Cnot1	8.50798	8.31236	8.51527	7.84258	8.35384	8.32381	8.3851	8.33107	8.0605	8.12264	8.27049	8.13056
Ttc3	8.05836	8.25008	8.20124	8.50877	8.25309	8.22884	8.36962	8.01285	8.18965	8.44644	8.35036	8.26925
Gnai2	8.20939	8.25528	8.26533	8.23686	8.31544	8.24016	8.1944	8.42649	8.20974	8.20537	8.30588	8.26031
Raly	8.05039	8.42722	7.97618	8.72659	8.29146	8.14752	8.13468	8.05085	8.29701	8.46041	8.31411	8.16644
Lgals3	7.2038	7.50412	7.47266	8.37213	8.24075	7.97196	8.38341	8.68767	8.4862	9.23292	8.99799	8.47893
Son	8.36138	8.07684	8.43474	7.93196	8.23948	8.43824	8.39372	8.23572	8.17477	8.19797	8.19862	8.22142
Uqcrc1	8.08481	8.3561	8.09086	8.24313	8.31832	8.0318	8.06794	8.12353	8.29729	8.37553	8.34614	8.46692
Papola	8.34636	8.31865	8.23637	8.18827	8.29365	8.21695	8.2522	8.05906	8.00563	8.2788	8.24829	8.30559
Prdx2	7.92284	8.16212	7.91472	8.83305	8.30483	8.11562	8.09475	8.12744	8.37478	8.65817	8.02982	8.1963
Psmd8	7.89784	8.40964	7.76332	8.5569	8.17792	8.01543	8.21519	8.21708	8.54428	8.52976	8.33916	8.06553
Myo7a	7.98368	8.01134	7.97763	7.78734	8.24605	8.33147	8.50853	8.06482	8.31401	8.39546	8.57475	8.51417
Fabp5	7.75651	7.71718	7.85105	8.62592	8.34539	8.00938	8.04862	7.99686	7.84462	8.67972	8.37582	9.45428
Rapgef2	8.19732	8.71151	8.22258	7.71806	8.25108	8.34187	8.46729	7.94467	8.39719	8.19101	8.35288	7.86882
Mki67	8.29577	8.19442	8.21932	7.85476	8.3529	8.46234	8.13117	8.03846	8.20974	8.01845	8.13624	8.72071
Ywhab	8.18864	8.21902	8.18691	8.30344	8.24403	8.16627	8.20136	8.10873	8.14984	8.28251	8.33043	8.25153
Ldhb	8.1596	8.34149	8.26573	8.44141	8.16705	8.01525	8.02256	8.11499	8.51082	8.28273	8.14015	8.09275
Tardbp	8.12451	8.19242	8.1307	7.99308	8.30192	8.29606	8.1509	8.54737	8.36358	8.20167	8.05356	8.15731
Rapgef1	8.24166	8.20011	8.27577	7.643	8.53124	8.1966	8.20972	8.31786	7.93496	8.20306	8.15734	8.59664
Ivns1abp	8.18224	8.09528	8.16884	8.28191	8.22753	8.30851	8.13192	8.1071	8.22309	8.38777	8.07894	8.29336
Serinc1	8.35026	8.22293	8.27911	8.21226	8.11831	8.11459	8.2957	8.34614	8.03887	8.20006	8.10338	8.18429
Ddx39b	8.33618	8.34971	8.10109	8.29066	8.14099	8.3574	8.11091	8.10663	8.20766	8.16282	8.02772	8.27371
Mt2	8.97639	8.65524	8.1441	8.26647	8.13419	8.14853	8.13769	8.0294	8.30037	7.63707	7.83712	8.13423
Cyc1	8.03465	8.21677	8.01668	8.54069	8.2054	8.01378	7.9852	7.95039	8.14393	8.47882	8.2638	8.53954
Cs	8.29091	8.27105	8.20702	7.88106	8.24226	8.08804	8.19824	8.16995	8.22456	8.19589	8.31778	8.28831
Larp1	8.23211	8.23213	8.26157	7.62352	8.36781	8.20657	8.40687	8.21621	8.06248	8.21958	8.37002	8.15707
Mat2a	8.18049	8.1144	8.01527	8.50919	8.14071	8.53957	8.13468	8.04722	8.1358	8.27485	7.97625	8.27992
Anp32e	8.26883	8.43738	8.19731	8.07694	8.32716	8.27007	8.05102	8.14749	8.25577	7.97857	8.06515	8.25446
Stt3b	8.27923	8.32596	8.172	7.9201	8.23059	8.12243	8.14169	8.04795	8.11082	8.19751	8.30458	8.43686
Nrcam	8.39096	8.43472	8.23758	7.7427	8.14396	8.23089	8.41515	8.30168	8.2798	7.97749	8.10887	7.97381
Cyp51	8.27541	8.151	8.53657	8.25906	8.19055	8.09343	8.05129	7.58303	8.27639	7.94088	8.30175	8.5168
Iqgap1	8.45175	8.02262	8.35485	7.73097	8.21677	8.20337	8.29817	8.43893	7.92954	8.10472	8.18287	8.21309
Cox7b	7.91514	7.8139	7.99084	8.79257	8.22421	8.17005	8.35139	8.04722	8.31484	8.72526	7.90693	7.86499
Cnn3	8.06723	8.41283	8.12744	8.20276	8.11831	8.19175	8.04569	8.0477	8.24098	8.03747	8.31584	8.26925
Slc6a6	8.45005	7.97362	8.25042	7.76135	8.41206	8.20144	8.02527	8.54926	7.46152	8.19055	8.07843	8.70332
Car9	8.57394	8.30102	8.62676	8.14444	8.35571	8.2187	8.3399	8.66997	8.16528	8.05394	7.8911	6.71605
Atp6v1g1	7.99136	8.21874	7.9018	8.76126	8.05382	8.11288	8.23498	7.8862	8.36518	8.43234	8.10638	7.98933
Pum2	8.24362	8.30181	8.3335	8.13826	8.04457	8.1838	8.29615	8.0605	8.08051	8.16566	8.20073	7.97491
Gpx4	7.77016	8.0525	7.70152	9.18051	8.27401	7.86474	8.04275	8.10057	8.12162	8.66857	7.8963	8.32717
Got1	8.17551	8.02583	8.08505	7.86716	8.09443	7.99868	8.44054	8.46713	8.40241	8.35678	8.24013	7.83487
Eif3e	8.09507	8.24016	7.99657	8.50313	8.1331	8.00053	8.19054	8.18766	8.08572	8.40291	8.0921	8.03621
Slc6a17	7.81449	7.95892	7.99204	7.87396	8.18688	8.23843	8.77538	8.00237	8.23718	8.37676	8.57961	7.91402
Surf4	8.18515	8.19897	8.07312	8.226	8.15662	8.10791	8.03579	7.89728	8.10153	8.15497	8.25505	8.55645
Cdc42	7.94913	8.22098	7.98148	8.47207	8.11803	8.03614	8.03766	8.15786	8.19748	8.36134	8.19652	8.18736
Cox6a1	7.9183	8.2193	8.0492	8.55104	8.08431	8.01506	7.9139	8.15336	8.37292	8.29296	8.03586	8.25198
Slc7a1	8.70212	8.64171	8.47017	7.65321	7.93063	8.349	8.35333	7.78537	8.0135	7.8856	8.04552	8.02754
Vdac2	8.03981	8.20861	8.04805	7.97269	8.12216	8.0737	8.05686	8.23465	8.37132	8.26626	8.20143	8.21772
Bag6	8.34871	8.28985	8.25899	7.7568	8.22804	8.24828	8.20638	8.29862	8.10186	7.92558	8.21768	7.92397
Cers2	8.13991	8.19613	8.08662	8.27237	8.09218	8.10017	8.0888	8.10803	8.05255	8.16353	8.09712	8.3558
Eif2s3x	8.09662	8.20011	8.01926	8.30728	8.16625	8.00735	8.08179	8.06002	8.02844	8.28426	8.16286	8.33444
Ipo7	8.27212	8.30155	8.27263	7.90563	8.14613	8.04942	8.21258	8.10756	8.06017	8.20767	8.18476	8.01056
Sdha	8.27787	8.3538	8.25122	7.68931	8.29121	8.10499	8.07632	8.18546	8.1619	7.98315	8.11483	8.22992
Hyou1	8.1357	8.1255	8.0971	7.86975	8.20955	8.09499	7.98102	7.57834	8.23777	8.09331	8.43222	8.78498
Igsf8	7.62665	8.31105	7.55099	7.87008	8.02766	7.97723	8.44682	7.91387	8.61571	8.38716	8.58945	8.25941
Arpc2	8.11293	8.29491	8.06701	8.09203	8.18898	7.93819	8.11803	8.24336	8.06808	8.17557	8.21606	8.03595
Rtn4	8.14591	8.15657	8.13244	7.8196	8.16811	7.99479	8.10247	8.37908	8.12225	8.15377	8.25483	8.12095
Cbx5	8.14141	8.05627	8.26711	8.11629	8.19186	8.24422	8.08465	8.06746	8.02979	8.07477	8.10788	8.14278
Khsrp	8.16374	8.20889	8.12875	7.65735	8.34162	8.24843	8.24431	8.15899	8.07038	8.09654	8.21976	7.96751
Mdh1	8.07448	8.1255	8.11103	8.11793	8.07412	8.00164	7.97991	8.14228	8.35875	8.23184	8.17028	8.11823
Ipo5	8.10495	8.28048	7.98172	7.94155	8.26757	8.02054	8.06293	7.96921	8.1105	8.08382	8.34	8.31383
Npc2	8.06881	7.92289	8.08729	8.35486	7.8303	8.01048	8.1635	8.20756	8.21391	8.24445	8.21999	8.07831
Map4k4	8.48334	8.32934	8.56913	7.73987	8.27426	8.28289	7.96503	8.18656	7.92156	7.72196	7.79442	8.08922
Phgdh	8.47812	8.58519	8.13655	8.68664	7.6231	8.02036	7.97795	8.07866	8.05521	8.08407	7.78292	7.82003
Ptp4a1	7.96516	8.17171	7.96526	8.27139	8.16331	7.98828	8.26188	8.16928	8.16804	8.26737	8.04578	7.89015
Cenpb	8.14591	8.40472	7.98629	8.02808	8.19995	8.09169	8.00373	8.17662	8.29167	8.08181	7.90779	7.98363
St13	7.90563	8.08455	7.89543	8.34346	8.11113	8.0863	8.14144	7.9152	8.14829	8.16258	8.25865	8.22326
Tnpo1	8.35622	8.19784	8.34721	7.643	8.23973	8.08019	8.20877	7.8997	7.94465	8.08832	8.13551	8.09904
Naa50	8.15723	8.22852	8.12592	7.82696	8.13392	8.09948	8.08725	8.04649	8.14206	8.15066	8.13722	8.10255
Idh3a	7.94295	8.00159	8.0202	8.20611	8.16838	7.90993	8.00455	8.09916	8.08669	8.46002	8.09712	8.23746
Brd2	8.25059	8.24458	8.1612	8.0123	8.19029	8.17662	8.14518	8.1043	7.92664	7.91857	8.05485	8.02675
Sf3b3	8.14591	8.29465	8.16609	7.70938	8.23263	8.1689	8.04756	8.25916	8.21361	7.97046	8.05563	7.94479
Atp5d	7.97832	8.12341	8.0115	8.31872	8.13854	8.07388	7.97655	8.02989	8.31512	8.08557	8.07945	8.05081
Eif3f	8.16787	8.21227	8.1294	8.02284	7.99594	8.13259	8.07475	8.3104	8.13737	7.99785	8.02904	7.96558
Mthfd1l	8.33644	8.25992	8.25421	7.82429	8.26856	8.10688	8.11828	8.27458	7.97721	7.99225	7.99819	7.75877
Gask1b	7.49383	8.19841	7.60887	8.06367	8.03527	7.94474	8.19872	7.97993	8.23133	8.49795	8.35393	8.55973
Tulp3	8.25614	8.19926	8.29721	7.95629	8.03235	8.12192	8.11014	8.24844	7.97581	7.99625	8.09084	7.87821
Smarca4	8.16964	8.13712	8.16418	7.58966	8.32215	8.13377	8.14543	8.21146	8.06808	7.93755	8.189	8.09098
Dctn1	8.2614	8.28852	8.22929	7.57103	8.24428	8.2222	8.1504	8.16235	8.12542	7.83646	8.15878	7.84568
Lima1	7.79058	8.12341	7.82526	7.89992	7.91645	8.20625	8.57253	7.98424	8.35472	8.17345	8.35855	7.86912
Sptbn1	8.16905	7.84692	8.22564	7.54527	8.13773	8.1689	8.29817	8.24717	8.03786	8.10274	8.12963	8.13546
Dnmt1	8.19212	8.30075	8.06701	7.6626	8.20515	8.2475	8.06636	8.13476	7.95037	7.96394	8.15179	8.07908
Dnaja1	7.71397	8.00224	7.9906	8.24238	8.14856	7.95203	7.94828	8.15224	8.30567	8.16968	8.29608	8.09199
Dmxl2	7.9218	7.91668	7.974	7.93816	7.84635	8.41319	8.44985	7.78188	8.18329	8.13479	8.29913	8.14934
Piezo1	8.07762	8.07962	8.18732	7.28617	7.98601	8.1341	8.41825	7.96536	8.06248	8.10249	8.31692	8.37996
Lamp2	8.06122	7.98652	8.03767	8.22474	7.88312	7.94359	8.23287	8.03455	7.98976	8.22731	8.22022	8.12982
Uhrf1	7.89286	8.19954	7.91219	8.0243	8.28411	8.12107	8.00647	7.90185	7.92265	8.1685	8.3113	8.2228
Eif3l	8.03142	8.07498	7.99323	8.12772	8.22446	7.99144	8.03094	8.07223	8.04723	7.99812	8.1631	8.20798
Amotl1	8.38185	8.20606	8.48808	7.577	8.13746	8.22615	8.18425	8.17795	7.85342	7.80549	8.00141	7.88812
Plod1	8.26663	8.02101	8.27283	7.8105	8.21394	8.10086	8.12512	8.32287	7.80179	7.96148	8.14452	7.81729
Slc16a3	8.10126	8.10805	8.05539	8.31682	8.4199	7.98005	7.96953	8.18281	7.81985	7.95985	8.04135	7.86912
Atp6v1a	8.26195	8.01392	8.30069	7.99129	8.01115	8.00182	8.18207	8.08812	7.97756	8.02682	8.12003	7.84119
Hexa	7.67761	8.30921	7.7204	8.35902	7.76002	8.01085	8.08699	7.79407	8.45009	8.2118	8.34255	8.08213
Arl6ip1	8.02427	8.15364	8.05928	8.23182	8.00222	8.01872	7.95625	7.93106	8.10474	7.9756	8.02376	8.30319
Actr2	8.10987	8.14127	8.05722	7.77907	8.15017	7.94896	8.02689	8.13156	8.12825	8.14034	8.19675	7.96503
Cadm1	8.09507	7.93557	8.23738	7.65284	8.07696	8.10465	8.47087	8.31946	7.75193	8.14371	8.23101	7.74729
Sumo2	7.80883	8.1694	7.82553	8.33549	8.02913	8.02945	7.90068	7.99887	8.23397	8.16613	8.05097	8.2168
Sf3b2	8.19588	8.2498	8.14216	7.60727	8.19264	8.12464	8.09861	8.17529	8.17934	7.8421	8.05045	7.85581
Nampt	8.0089	8.11951	7.88594	8.13179	7.90436	7.82248	8.40229	8.04673	8.04389	8.53012	8.25257	7.54884
Atxn2l	8.42685	8.05061	8.20619	7.59202	8.06786	8.28517	8.27559	8.00612	8.01384	7.85038	8.07869	7.8127
Ube2v1	8.05518	8.0965	7.99204	7.94155	8.18793	8.04298	8.03337	8.06122	8.03147	7.94916	8.083	8.18925
Insig1	8.50495	7.98058	8.62445	8.33878	8.0891	8.09412	8.06161	7.44401	7.9702	7.67848	7.85029	8.01509
Atp11a	7.89535	7.73572	8.06678	7.60103	8.0727	8.17416	8.38889	7.65898	8.10089	8.22867	8.31627	8.40819
Ssr1	8.1351	8.13653	8.03048	7.92978	8.0727	8.05993	8.00043	7.88185	7.99978	7.98637	7.87772	8.52784
Myl6	7.7752	8.037	7.82204	8.41987	8.02414	7.99423	8.03713	8.0708	8.52022	8.24983	8.01316	7.66831
Lars2	8.136	8.30366	8.16205	8.60035	8.26483	7.8103	7.42964	7.60331	8.17202	7.94861	8.33979	7.85284
Hmgn2	8.00725	8.24182	7.89874	8.54659	8.05295	8.07388	7.92555	7.9258	8.11782	8.04083	7.74882	8.02675
Uqcrq	7.77867	7.96729	7.799	8.88788	8.01972	7.87061	7.94771	7.93841	8.15696	8.52496	7.8311	7.87528
Txn1	7.80921	7.94679	7.74698	8.23106	7.87499	7.9044	7.9348	8.18568	8.24331	8.39526	8.17528	8.14813
Wnk1	8.07762	7.83965	8.34271	7.58215	8.1832	8.04531	8.24919	8.08505	7.9051	8.04212	8.22895	8.00816
Mybbp1a	8.16581	8.1554	7.96087	7.69078	8.21471	8.03524	7.99353	8.0262	7.87424	8.12117	8.13771	8.17003
Mtdh	8.27623	8.13594	8.19503	7.82496	8.14342	8.07388	7.94599	7.87831	7.82336	7.95602	7.9226	8.35559
Cdk2ap1	8.10002	8.15687	7.92502	8.33008	8.3917	7.89767	7.56538	8.04163	7.87986	7.91941	7.68079	8.55846
Rab38	7.73798	8.07405	7.62221	8.33714	7.88085	7.87284	8.14069	7.72508	8.23981	8.39182	8.32165	8.09652
Mc1r	7.85347	8.00224	7.90739	8.09564	7.91327	8.07071	8.15635	8.67312	7.99149	8.11039	7.97598	7.67203
Fam168b	8.21596	8.17692	8.18607	7.71589	8.05555	8.12396	7.98214	7.85272	8.10666	7.84654	8.09888	8.05444
Gtf2h1	7.83541	8.16183	7.90383	8.01817	8.05871	8.02509	8.00675	7.82808	8.08214	8.06032	8.02851	8.33827
Mapk1	8.10711	8.08393	8.12657	7.9904	7.98752	7.93993	8.0703	7.96613	7.96103	8.11383	8.10088	7.89911
Cnot6	8.01087	8.02326	8.17432	7.96664	8.11417	8.07212	7.94456	7.98854	7.95855	7.94364	8.05588	8.07117
Hmgb2	8.07196	8.48291	7.78196	8.4377	8.0376	8.04531	7.65836	7.80502	8.21331	8.00501	7.67744	8.10054
Cyb5a	7.72962	8.46033	7.71548	8.23333	7.93376	8.01103	7.94542	7.79956	8.67257	8.05598	7.92938	7.78864
Purb	8.06818	7.95185	8.27105	7.61387	8.14261	8.08995	8.10349	8.20125	8.00563	7.89277	7.99658	7.92624
M6pr	7.89997	8.03891	7.84762	8.22194	8.04225	7.86798	8.03793	7.94181	7.93496	8.23996	8.07716	8.10704
Zfp106	8.25614	8.03828	8.24502	7.56383	8.15233	7.95965	8.14319	7.97177	7.78269	7.94475	8.01157	8.15852
Rlim	8.2882	8.19727	8.19876	7.7083	8.00729	7.96648	8.10784	8.04017	7.99841	7.8314	7.92966	7.8855
Qk	8.17727	8.04113	8.09998	7.83296	8.138	8.05353	8.01522	8.05978	7.84539	7.89448	7.88064	8.11773
Dhx9	8.16817	8.16358	8.04598	7.48557	8.21187	8.13697	8.00043	8.07104	8.06347	7.83408	8.00222	7.97217
Arpc1b	7.92389	7.93557	8.06292	8.0775	8.02913	7.88711	7.88078	8.2056	7.82531	8.08757	8.14209	8.08466
U2af2	8.05263	8.11289	8.02067	8.0123	8.19029	8.08473	7.82745	7.7731	8.04423	7.99732	8.03507	7.98173
Stx7	7.71478	8.0136	7.8712	8.20379	7.7639	7.91856	8.24245	7.87886	8.26583	8.37676	8.24738	7.62993
Stt3a	8.2397	8.00257	8.09532	7.74376	8.03089	7.96535	7.98604	7.84911	7.93351	7.89105	8.05071	8.33869
Arf4	7.9457	7.91357	7.88156	8.12311	7.89217	7.85413	8.05924	7.88647	8.03114	8.31853	8.14865	8.02622
Vegfa	8.62418	8.0697	8.32062	7.6551	8.19029	8.15136	8.26004	8.55028	8.00803	7.88329	7.44282	6.90702
Alkbh5	8.3346	8.13861	8.22258	7.71878	8.07327	7.89548	8.1193	8.12238	7.82375	7.87781	8.09863	7.62331
Ssb	7.96651	8.26482	7.82874	8.10117	8.02326	7.91209	7.93249	8.02768	8.06314	8.07527	7.84372	7.99554
Sympk	8.03852	8.22656	8.03489	7.60142	8.14071	8.05103	8.01467	7.95143	7.97055	7.78097	8.12595	8.07908
Rpa1	7.8369	8.12071	7.84445	8.09675	8.02473	7.95183	7.92931	7.86213	8.03619	8.06312	8.12545	8.1033
Rab27a	7.55863	8.03541	7.62252	8.31086	7.79765	8.1	8.3572	7.77398	8.41435	8.1989	8.15276	7.67068
Rrbp1	8.30035	7.96762	8.15289	7.33772	8.09386	8.06401	8.16227	8.0409	7.9842	7.80275	8.01236	8.049
Gns	7.90351	7.82241	7.96209	7.61271	7.98903	8.03343	8.26989	7.84325	7.92265	8.08657	8.3436	8.17337
Eif4ebp2	8.08138	8.26617	8.1663	7.59044	8.10169	8.08682	7.79258	8.00062	8.12289	7.59443	7.88762	8.26523
Eif3d	7.97057	8.14482	7.74443	8.12989	8.03614	7.78691	7.89714	7.99434	7.96632	8.12117	8.06823	8.06476
Phb	7.54871	7.87815	7.58783	8.738	8.18872	7.70646	7.88496	7.67446	8.02573	8.4548	8.08604	8.1043
Maz	7.95802	8.19442	7.86704	8.07469	7.99324	8.08142	7.9348	7.86378	8.12605	7.83229	7.89457	8.05315
Gpr137b	7.92842	7.87424	7.955	7.7554	7.74083	8.00791	8.27195	7.92738	8.49012	8.10842	7.97871	7.83186
Pa2g4	7.85457	8.15482	7.67557	8.1423	8.11085	7.88551	7.76367	7.81901	7.98872	8.04573	8.05717	8.3423
Cdc37	7.92389	8.1032	7.90612	8.07946	8.04109	7.93877	7.88615	8.09212	8.02404	7.9593	8.03009	7.83427
Ndufs2	7.90563	8.03063	7.95181	8.21123	7.96043	7.81409	7.88586	7.93054	8.03619	8.07426	8.01821	7.99662
Nup205	8.09631	8.09314	8.0379	7.67268	8.1832	7.98379	7.95056	7.83512	7.86254	7.88789	8.13282	8.02727
Cd81	8.1489	7.98882	8.2101	7.89228	8.15528	8.04226	7.9517	8.31946	7.8132	7.74021	7.66496	7.80565
Plod2	8.27978	8.1144	8.22095	7.95568	8.08318	8.05299	7.91653	8.02866	7.79386	7.6884	7.75996	7.81209
Arcn1	8.15842	8.04462	8.07921	7.83562	8.00371	7.90894	8.02905	7.8843	7.7682	7.97803	7.99684	8.01163
Erh	7.74629	8.04367	7.72817	8.56253	8.00401	7.86494	7.66463	7.81417	8.07267	8.23546	7.78136	8.17599
Ssrp1	8.04335	8.23518	7.94935	7.79794	8.09415	7.99627	7.86937	7.93736	8.04856	7.80275	7.91236	7.99554
Adam12	8.82844	8.11228	9.01156	7.78768	8.38828	8.40776	7.80367	8.10733	6.98924	7.24187	7.31616	7.66933
Rps21	7.44799	7.70522	7.64276	8.82538	7.9018	7.94647	7.78236	7.85411	8.22986	8.45422	7.74306	8.12416
Aup1	7.91935	8.05816	7.80364	8.25112	7.96656	7.82395	7.9098	7.71473	7.98141	7.95821	8.02877	8.24042
Snrpb	7.89072	8.10987	7.82874	8.17626	7.95889	7.94858	7.6726	7.97126	8.02878	8.05163	8.01502	7.99095
Nop56	7.70222	8.00257	7.51219	8.30392	8.00013	7.98342	7.90569	7.9669	7.90731	8.27331	7.81104	8.25626
Slc38a2	8.48877	8.32048	8.26987	7.69188	7.48126	8.27221	8.10656	7.23369	7.82531	7.73063	7.9055	8.29489
Cotl1	7.98368	8.02679	8.01762	7.96086	8.0961	7.99088	7.84596	7.87913	7.95677	7.80792	7.96612	8.07449
Arpc5	7.79898	7.90558	7.82499	8.22803	7.89731	7.89489	7.98465	8.05496	8.03753	8.27945	7.92316	7.73183
Impad1	8.16551	7.97096	8.23516	7.94186	8.03206	7.95145	7.86241	7.91653	7.70156	7.89591	7.6908	8.1824
Mcm6	7.75925	8.2678	7.73447	7.72417	8.12846	7.99014	7.80209	7.91626	7.98245	7.98717	8.16022	8.08111
Tax1bp1	8.10649	8.13088	8.04137	7.72811	7.83701	7.90618	8.11065	8.07866	7.98976	7.92194	7.96171	7.64719
Ubap2l	7.95597	7.92358	8.04966	7.59123	8.18662	8.04567	8.11422	8.06841	7.80218	7.87492	8.01449	7.83095
Hnrnpc	7.76238	8.01812	7.77753	8.30536	8.02002	7.88971	7.81122	7.45685	8.08116	8.11628	7.98143	8.22142
Nup210	8.28005	8.31499	8.0695	7.5178	8.0052	8.04244	7.98046	7.59967	7.79108	7.58241	8.0105	8.24179
Bhlhe41	7.73639	7.97826	7.63175	7.75434	8.09638	7.90519	8.35957	8.05882	8.39562	7.98851	8.38469	7.14533
Mlec	7.919	7.90139	8.15567	7.78045	8.03235	7.92695	7.89832	7.6427	7.95144	7.96012	7.98496	8.27171
Ap2b1	8.00824	7.91703	8.06497	7.62352	8.07156	7.94877	8.1132	7.95893	7.91207	7.90416	8.13551	7.73829
Slc2a1	8.28277	8.06535	8.01762	7.86227	8.15636	7.89489	7.92787	8.21384	7.72676	7.78251	7.86392	7.59761
Cyb5b	8.02525	8.14452	8.00843	7.73596	8.02149	7.90993	7.86272	7.74107	7.95677	7.88761	8.02798	8.04848
Fn1	7.6107	7.46116	7.73361	7.31313	8.25835	8.01066	8.02689	8.10849	7.84769	8.14971	8.15493	8.66077
Prmt1	7.81185	8.08517	7.62591	8.36017	8.00252	7.77399	7.65801	7.73896	7.90951	8.23568	7.94117	8.16524
Hadha	8.09569	7.9325	7.99347	7.7617	7.98662	7.95813	7.96925	7.90907	8.01657	7.86153	7.9768	7.83397
Dlst	7.7616	7.91668	7.74783	7.93785	7.94468	7.8933	7.90068	7.97228	8.1336	8.06464	7.93529	8.08568
Rnf10	7.92494	8.08085	8.00228	7.74589	8.06615	7.95298	7.85725	7.90587	7.91244	7.73734	7.99577	8.09853
Stip1	7.73202	8.05533	7.69214	8.16097	8.07639	7.8029	7.78939	7.75777	8.04723	7.99599	8.00007	8.159
Syngr1	7.60549	7.7148	7.73418	8.41053	7.92277	7.79354	7.92555	7.96972	7.90252	8.37594	7.86951	8.00843
Txnrd1	8.1354	8.04651	7.98004	7.74199	7.9174	7.90539	7.74407	7.84743	7.8132	7.89505	8.0293	8.17504
Car14	7.92494	8.24016	7.97907	8.19009	7.81475	7.97892	7.72019	7.85133	7.835	7.64897	7.77322	8.23518
Rpl22	7.9176	7.89052	7.85736	8.32843	7.8004	7.84942	7.90363	7.87858	8.09896	8.11407	7.66055	7.85492
Capza2	7.88392	7.96996	7.88928	7.97299	7.86649	7.8143	7.94828	7.96742	7.90804	8.09654	7.93613	7.87909
Ddx21	8.0929	7.9852	7.84921	7.42683	8.11057	7.88551	7.96982	7.96048	7.76375	7.97938	8.0121	8.07806
Itgav	7.99402	7.76712	8.07312	7.57779	8.1249	7.94609	8.00537	8.04187	7.63214	7.85596	8.15034	7.93357
Ppp1cb	7.97865	7.96962	7.89312	8.12718	7.85265	7.80586	7.9554	7.94076	7.79545	8.14875	7.90435	7.72405
Psme3	7.79517	7.95758	7.86495	7.89801	8.05497	7.8925	7.83674	7.90345	7.86026	7.9135	8.05666	8.05677
Nfe2l1	8.42315	8.07869	8.31509	7.34847	7.85365	7.99088	8.04836	7.96331	7.82919	7.59689	7.89197	7.72989
Ncapd2	8.07322	8.18727	7.97473	7.56663	8.13528	8.05157	7.77787	7.9371	7.92882	7.60354	7.8589	7.95758
Lman2	7.75102	7.9852	7.77448	8.05315	8.03935	7.76487	7.77755	7.60989	7.87574	7.96747	8.01953	8.4275
Grn	7.361	7.4814	7.49509	7.44435	7.71811	7.79759	8.28172	8.23593	8.09896	8.3029	8.62191	8.20122
Uggt1	8.01906	7.93557	8.03744	7.57342	7.93564	7.94205	7.97963	7.81246	7.84922	7.7456	8.05614	8.15393
Picalm	8.10803	8.09069	8.04644	7.51282	7.95087	7.96117	8.01576	7.83681	7.92229	7.81337	7.89486	7.72665
Gspt1	7.89855	7.98915	7.82069	8.05657	8.00073	7.82102	7.84258	7.67948	7.71211	8.01056	8.00061	8.04014
Psmd3	7.9021	8.11349	7.73789	7.67119	8.05698	7.85352	7.81498	7.76634	7.83538	7.91011	8.05019	8.08416
Clta	7.77944	7.93796	7.78085	8.20867	7.85365	7.79971	7.82123	7.81531	7.93784	7.98422	7.94368	7.92878
Skp1a	7.58136	7.93044	7.56134	8.42186	7.83097	7.81051	7.75684	7.89269	7.93676	8.20398	7.83231	8.02754
9530068E07Rik	7.96244	7.95489	7.9459	8.22016	7.87564	7.81178	7.74341	7.78712	7.77063	7.92781	7.71619	8.06373
Col4a1	8.24166	8.07281	8.1233	7.39473	8.13528	8.15684	7.55979	7.98627	7.66987	7.33789	7.53055	8.56592
Lrrc59	7.97158	7.88488	7.8258	7.77873	8.04254	7.72201	7.73052	7.67728	7.71505	8.03617	8.11459	8.27571
Ddx6	8.04463	7.90034	8.23516	7.44348	8.01174	8.01963	8.05182	7.83709	7.74907	7.70381	8.01077	7.69579
Dusp4	8.16463	8.29677	8.1413	7.55135	8.04631	7.84263	8.15462	7.84045	7.85798	7.69367	7.77133	7.33965
Ctnnd1	7.97226	7.94102	7.93326	7.49779	7.99624	7.92286	8.08205	8.09095	7.91281	7.76605	7.88559	7.69844
Adam9	8.0272	8.08947	7.89772	7.58255	7.91803	7.94128	7.73913	7.75628	7.89068	7.74275	7.88355	8.22946
Psmc1	7.92807	7.96127	7.78279	7.8396	7.93126	7.8164	7.85116	7.9733	7.93279	7.96094	7.81257	7.88667
Ankrd11	8.30919	8.09192	8.19565	7.37201	7.93658	8.06666	8.13569	7.70891	7.59567	7.74719	7.69645	7.8179
Hsd17b12	7.92981	7.97461	7.90333	8.02197	7.84768	7.79333	7.81373	7.79552	7.86859	7.80853	7.80982	8.0778
Nisch	7.92633	7.88205	8.03071	7.52276	7.98601	8.16511	7.97178	7.62297	7.90584	7.82421	7.95564	7.83125
Mgrn1	8.27623	7.87992	8.15054	7.66821	7.84967	8.14819	7.90068	7.95996	7.8633	7.72068	7.5231	7.6727
Eng	7.77094	7.82904	7.87068	7.51199	7.93658	7.83124	7.96418	7.95221	7.75111	7.85802	8.17575	8.1602
Slc25a39	7.83801	8.01876	7.79845	8.01377	7.91803	7.71685	7.68465	7.91121	8.02506	7.83943	7.79998	8.02727
Ssr2	7.7655	7.94374	7.6458	8.34672	7.71228	7.77788	7.6764	7.65453	7.98315	7.84772	7.8701	8.35097
Gng12	8.04399	8.09375	7.92276	7.80237	7.97875	7.92403	7.8478	7.81503	7.60612	7.78929	7.83592	7.90286
Rpl36al	7.54554	7.72233	7.51086	8.48419	7.87304	7.74779	7.74735	7.72781	8.04356	8.28992	7.78822	8.01056
Pcbp4	7.73162	8.03191	7.73646	7.80746	8.00073	7.80332	7.60322	7.93422	8.00254	7.78375	7.84581	8.20635
Ap3d1	8.00956	7.90349	8.01386	7.45347	7.98812	7.9115	8.07632	7.83062	7.89883	7.74972	7.91806	7.70801
Srsf5	8.15039	7.90279	7.84709	7.56943	7.63508	8.31343	8.02743	7.94676	8.17965	7.74402	7.3553	7.75208
Pianp	7.78022	7.9301	7.88825	7.55337	7.63354	8.02709	8.13869	8.00212	8.04222	7.78097	8.06925	7.56528
Rab5c	7.69366	7.82056	7.69361	7.94986	7.76002	7.67112	7.92845	7.94572	7.8136	8.12288	8.15782	7.84867
Ppfibp1	8.0666	7.89333	7.96356	7.72417	7.92277	7.81156	7.96277	8.06074	7.66162	7.81669	7.87509	7.64513
Ndufs1	7.97023	7.99145	7.919	7.75083	7.84202	7.81703	7.76626	7.82327	8.04423	7.82601	7.79844	7.83758
Smarcc1	7.95938	8.00029	7.9723	7.4694	8.0812	7.95126	7.93912	8.01508	7.65507	7.74307	7.85682	7.72924
Syncrip	7.90139	8.02358	7.89056	7.6517	7.96074	7.91032	7.77723	7.8244	7.82609	7.85977	7.85296	7.88113
Arpc3	7.58136	7.87067	7.57161	8.39665	7.82626	7.66972	7.95767	7.79321	8.00494	8.10694	7.88472	7.68847
Gfpt1	8.18311	7.88876	8.20619	7.54486	7.93533	7.87748	8.01113	7.75004	7.74249	7.71227	7.89976	7.59227
Jpt1	7.68215	7.91564	7.66331	8.13179	7.92749	7.74006	7.62482	7.82015	8.02065	7.90898	7.90062	7.97053
Vars	8.01382	8.05659	7.80663	7.45131	7.90276	7.85924	7.84074	7.97254	7.82375	7.81518	8.02191	7.73926
Naglu	7.92633	8.06877	7.7563	7.8541	7.73113	7.84015	8.06977	8.13179	7.91938	7.82481	7.85534	7.30178
Wbp2	7.92005	7.99833	7.96988	7.64793	7.83198	7.92306	7.98826	7.85771	8.05388	7.59934	7.88035	7.57974
Ddx1	7.9655	8.12131	7.83249	7.67528	7.91708	7.76879	7.7242	7.89943	7.85189	7.81065	7.78011	7.89652
Eogt	7.36717	7.69397	7.49374	7.70248	7.66932	7.84015	8.28693	7.55191	8.23397	8.1153	8.26469	8.00949
Ccnd1	8.13027	7.87957	8.26691	7.41798	7.96227	7.68683	7.78716	8.00037	7.64541	7.87202	7.96584	7.53741
Tm4sf1	7.53187	8.06628	7.44149	8.65857	7.99444	7.62101	7.5665	7.89107	7.73465	8.3601	7.46866	7.78459
Nsun2	7.97293	8.04462	7.75602	7.73382	7.98178	7.63155	7.78748	7.85133	7.7138	7.85303	7.88617	7.88754
Capns1	7.71155	7.86924	7.76192	7.86813	7.84834	7.70237	7.83488	8.02915	7.94966	7.79726	7.89312	7.82489
Foxk2	7.75651	7.80272	7.87042	7.93661	8.01322	7.74779	7.87268	7.47392	7.67678	7.87289	8.02112	8.01562
Cttn	7.86986	7.82609	7.91043	7.47367	7.85629	7.84778	7.94399	8.14046	7.87273	7.83438	7.79287	7.68312
Psmb4	7.55503	7.83709	7.5834	8.2802	7.84568	7.58127	7.7108	7.84409	7.89291	8.16613	7.97461	7.76574
Sqle	8.18049	7.72865	8.30743	7.51614	7.90532	7.71459	7.89891	7.71136	7.83615	7.57316	7.82868	7.80964
Ptpa	7.6718	7.94848	7.70677	8.10173	7.87271	7.85985	7.70608	7.85577	7.84347	7.81609	7.78199	7.81942
Psmc3	7.5337	7.77056	7.45958	8.18853	7.92403	7.66716	7.78044	7.75925	7.82375	8.1621	7.94089	7.93947
Dazap2	7.88929	7.93932	7.76695	7.87655	7.78868	7.76073	7.71617	7.98043	7.77063	7.78683	7.77447	7.88928
Cops7a	7.65172	7.85488	7.62128	8.18645	7.8028	7.73318	7.81404	7.69937	7.88547	7.95848	7.94675	7.72111
Lgals3bp	7.17654	7.20224	7.29498	7.34521	7.94405	7.61015	8.70886	8.39156	7.69987	8.62773	8.70363	7.1228
2020-09-02	7.85494	7.8491	7.76947	7.93723	7.85629	7.68223	7.76626	7.65262	7.71799	8.01661	7.81074	7.90286
Acat1	7.80088	7.9253	7.84127	8.20302	7.84269	7.73873	7.68909	7.54848	7.83731	7.92194	7.72401	7.70604
Tmem30a	7.83281	7.77286	7.81287	8.09952	7.78209	7.67089	7.80556	7.70891	7.68366	8.03124	7.72726	7.83367
Etf1	7.89215	8.01263	7.71259	7.71842	7.82457	7.72112	7.67467	7.70277	7.80967	7.91153	7.79659	7.95702
Dhx15	7.83541	7.96093	7.77309	7.61348	7.96319	7.81346	7.66637	7.65739	7.7138	7.86969	7.87743	7.98635
Lrrfip1	7.89428	7.84184	7.89338	7.42771	7.85067	7.85863	8.05155	8.21643	7.82219	7.6999	7.69313	7.41898
Mcl1	7.65298	7.9325	7.69243	7.90309	7.76847	7.68269	7.86876	7.58971	7.84424	7.86358	7.9274	7.92312
Mical3	7.63562	7.60066	7.88877	7.60103	7.7221	8.03451	8.0558	8.11892	7.85456	7.67149	7.73211	7.72242
Ppp4r2	7.95187	7.89017	7.80336	7.84291	7.73329	7.7603	7.76367	7.69473	7.8716	7.83468	7.78511	7.70042
Rab1a	7.79555	7.79747	7.74187	7.67453	7.78799	7.71572	7.75814	7.75212	7.86557	7.87839	7.87655	7.98091
Ppib	7.62836	7.70482	7.59509	8.27139	7.86058	7.66063	7.5406	7.64687	7.80889	8.03358	7.73631	8.13619
Atp6v0a1	7.89571	7.88523	7.88568	7.24526	7.86879	7.88791	7.86876	7.76575	8.01111	7.60494	7.86628	7.83608
Matr3	7.78368	7.97594	7.71201	7.90119	7.79421	7.7314	7.87057	7.70184	7.81438	7.92082	7.69909	7.70933
Nr4a3	7.99834	7.97295	7.94959	7.42418	7.69761	7.82206	8.5291	8.38984	7.80455	7.43657	7.67744	6.86809
Ahcy	7.71115	7.98355	7.60949	8.20842	7.9372	7.6477	7.55304	7.57599	7.5943	7.89619	7.76534	8.08441
Amfr	7.9169	7.98124	7.91799	7.70684	7.6347	7.69027	7.73648	7.74137	7.72551	7.81579	7.8317	7.85105
Paics	7.75141	7.93693	7.6296	8.03706	7.7807	7.75373	7.66706	7.67666	7.72301	8.00687	7.76345	7.80257
Rbm39	8.04174	7.95926	7.88928	7.59634	7.75471	7.84675	7.73218	7.61939	7.89957	7.7418	7.73792	7.70801
Bnip3l	8.11813	7.93044	7.96964	8.33643	7.87499	7.71932	7.92526	7.90453	7.54085	7.84684	7.4345	6.90645
Mrpl12	7.39663	7.66751	7.30387	8.67388	8.02913	7.56085	7.6155	7.41835	7.8136	8.23659	7.73728	8.01456
Srpr	7.97293	7.8001	7.91749	7.82228	7.80964	7.75658	7.74571	7.73204	7.641	7.7239	7.7292	7.78177
Litaf	7.73401	7.66874	7.79845	7.72058	7.86025	7.66903	7.90186	8.04746	7.72342	7.76605	7.90607	7.62157
Sorbs3	7.60679	7.6393	7.6253	7.56062	7.68762	7.99609	8.21992	8.13064	8.00323	7.69924	7.75456	7.4846
Mtap	7.60331	7.81167	7.66121	8.01172	7.87727	7.71301	7.60104	7.74316	7.53515	7.97668	7.85058	8.00173
Kars	7.62708	7.89474	7.56681	7.63882	7.84768	7.61499	7.82217	7.74884	7.73919	7.96367	7.9448	7.95896
Apold1	8.28902	7.98223	8.04897	7.48472	8.09582	7.60505	7.89002	8.07889	7.58882	7.62919	7.46127	7.2095
Actr1b	7.72322	7.90244	7.78196	7.78287	7.90532	7.7334	7.58571	7.67571	7.74043	7.77539	7.81471	7.93695
Ptprm	8.12026	7.94949	8.04989	7.64338	7.7501	8.01323	7.88645	7.74017	7.57686	7.51747	7.55707	7.5459
Ranbp1	7.57026	7.88946	7.49374	7.98801	7.94995	7.7103	7.51346	7.53332	7.92411	7.88473	7.70372	8.15948
Psma3	7.46343	7.61607	7.36752	8.27164	7.75967	7.55884	7.77143	7.665	7.72593	8.39182	7.82989	7.88463
Ppm1g	7.68833	7.89298	7.6154	7.50825	8.01293	7.7247	7.56984	7.75628	7.75765	7.77849	7.79256	8.17551
Bace2	6.89197	7.67243	7.10342	7.96603	7.57975	7.64368	8.20662	7.3586	8.33355	8.22981	8.40976	7.87235
Trf	7.85969	7.8824	7.85736	7.77492	7.81509	7.77377	7.74308	8.0834	7.84116	7.458	7.53278	7.63201
Polr2m	7.77867	7.87352	7.74953	7.78562	7.75648	7.77269	7.76723	7.57296	7.82609	7.73383	7.77542	7.83306
Metrn	7.7075	7.86853	7.67705	8.30775	7.92592	7.43353	7.39278	7.63626	7.73547	7.93949	7.48563	8.09376
Rrp1	7.76043	7.88417	7.6702	7.59947	7.87857	7.74889	7.71517	7.81702	7.90877	7.69531	7.77573	7.74921
Brd4	8.01054	7.75208	7.98485	7.20982	7.90276	7.90934	7.85177	7.8602	7.67635	7.70284	7.78292	7.55837
Thrap3	8.00988	7.85957	7.78445	7.48472	7.88668	7.96838	7.8536	7.74795	7.65769	7.62265	7.67239	7.64444
Plekhm2	7.80883	7.77286	7.80554	7.7589	7.52637	8.00367	7.91945	7.93631	7.81046	7.53114	7.81928	7.48767
Mrs2	7.9604	7.88629	7.94738	7.48557	7.83198	7.8206	8.03363	7.60759	7.84232	7.60389	7.70964	7.43894
Eftud2	7.71074	7.91737	7.64701	7.6723	7.97267	7.71256	7.66324	7.74167	7.69008	7.72839	7.87157	7.82155
Fkbp8	7.72162	7.88805	7.57863	8.12283	7.73545	7.706	7.69897	7.6631	7.86595	7.85743	7.74659	7.5569
Arhgef12	7.91057	7.67243	8.07154	7.30308	7.81407	7.84572	7.97038	7.7187	7.57223	7.75885	7.93079	7.56347
Egln1	8.25087	8.25965	8.09265	7.49737	7.81916	7.76987	7.81028	7.96176	7.87123	7.3899	7.51185	6.89493
Mcm3	7.67305	7.98685	7.51652	7.55659	7.90691	7.76051	7.53415	7.74226	7.86368	7.81579	7.77792	7.98254
Tpr	7.92633	7.78199	7.84392	7.18606	7.83901	7.79397	7.83704	7.81958	7.72509	7.65337	7.85445	7.85463
Nop58	7.83058	7.93284	7.56263	7.7959	7.85695	7.66693	7.66775	7.48578	7.72842	7.92865	7.67408	7.96503
Nacc1	7.82012	8.03191	7.8738	7.26462	7.88894	7.66063	7.87688	7.75331	7.83035	7.61608	7.71978	7.74985
Shmt2	8.00758	8.17923	7.61043	7.72345	7.45053	7.83767	7.77948	7.56654	7.84385	7.66212	7.66225	7.75144
Ppp1r15b	8.082	8.0503	7.8967	7.57103	7.56487	7.83498	7.82341	7.37339	7.77547	7.58241	7.62618	7.8916
Rps29	7.93916	7.27954	8.08348	7.71842	7.88182	8.05691	7.84135	7.79869	8.13454	7.5552	7.45031	7.33241
Phlda1	7.92772	7.85885	7.8529	7.8283	7.88603	7.68522	7.82217	7.58738	8.01179	7.47606	7.81196	7.32256
Sf1	7.85604	7.85813	7.76974	7.37156	7.92906	7.84263	7.88556	7.69876	7.76253	7.58525	7.75996	7.74569
Xpo1	7.79173	7.8721	7.70619	7.66036	7.82018	7.68107	7.66498	7.58136	7.71169	7.85038	7.7876	7.90917
Mapre1	7.57826	7.82977	7.6293	7.86325	7.89571	7.69964	7.59777	7.58671	7.67635	7.85508	7.79597	8.01828
Igfbp4	8.0353	8.03637	8.04299	7.77942	7.90819	7.91288	7.28297	8.15449	7.59156	7.25217	7.34815	7.66017
Aebp2	7.92319	7.83087	7.95769	7.40908	7.72789	7.83082	7.82154	7.92764	7.83345	7.62575	7.71423	7.37986
Sf3a1	7.80012	7.85885	7.79462	7.51033	7.84068	7.76313	7.80524	7.67257	7.76699	7.64252	7.89399	7.59939
Hmgcr	8.12148	7.7251	8.1546	7.47921	7.89571	7.68844	7.83704	7.37764	7.70664	7.3903	7.71945	7.84568
Magt1	7.74669	7.72194	7.76528	7.68784	7.7057	7.81955	7.62874	7.29342	7.90657	7.64252	7.79721	8.22073
Aff4	8.16167	7.69438	8.15695	7.39293	7.71956	7.85024	8.04676	7.62428	7.55405	7.61504	7.61501	7.49685
Hnrnpul1	8.01513	7.83928	7.899	7.31265	7.8802	7.84922	7.90157	7.74795	7.64232	7.50592	7.72596	7.6001
Mmp14	7.8695	7.90801	7.91598	7.29489	7.84768	7.76922	7.60068	7.83653	7.72967	7.41601	7.62095	8.10129
Chchd3	7.64877	7.87886	7.62868	8.073	7.7192	7.5783	7.66949	7.43588	7.77708	7.91378	7.70306	7.86617
Ubl3	7.42993	7.81315	7.55262	7.98771	7.74903	7.5783	7.97403	7.69721	7.79426	8.0103	7.8704	7.40727
Eef1d	7.4844	7.76174	7.43974	7.98112	7.7949	7.62869	7.62303	7.56789	7.88323	7.93394	7.78043	7.98363
Capzb	7.6245	7.75673	7.54677	7.81691	7.8028	7.66833	7.67467	7.78188	7.74784	7.79665	7.87509	7.75431
Psma7	7.1911	7.49905	7.14055	8.60659	7.93345	7.50304	7.7388	7.46123	7.69902	8.46581	7.74146	7.85492
Eif2s1	7.4255	7.73022	7.36346	8.17783	7.83198	7.53836	7.68259	7.46777	7.70621	8.19821	7.81502	7.87059
2020-09-07	7.65341	7.63468	7.61974	8.14068	7.78244	7.67715	7.69863	7.63723	7.56666	8.03488	7.6445	7.68312
Galk1	7.69897	7.8072	7.54123	8.24488	7.85033	7.5696	7.71919	7.73896	7.58698	8.08256	7.63968	7.27715
Gpc1	7.60201	7.65306	7.57704	7.44653	7.93094	7.62509	7.81467	7.62752	7.6703	7.7673	7.91179	8.11153
Scd1	8.40477	7.67611	8.60317	7.50449	7.84169	7.75197	7.57244	7.33097	7.25649	6.96326	7.71455	8.11724
Atp13a3	7.98435	7.70882	7.97448	7.45347	7.85398	7.7425	7.66498	7.67226	7.39234	7.63536	7.63243	8.01775
Chsy3	8.00032	7.75208	7.91371	7.27935	7.8912	7.88029	8.02039	7.79118	7.51601	7.65472	7.67844	7.33667
Edem1	7.81185	7.70762	7.87768	7.55135	7.60749	7.67668	7.65801	7.62558	7.74208	7.70772	7.89399	7.81912
Nars	8.14291	8.11771	7.82231	7.4487	7.5042	7.78046	7.81655	7.66816	7.77184	7.53554	7.63865	7.36408
Psmc5	7.53232	7.75711	7.5205	7.93847	7.76495	7.58768	7.61909	7.63787	7.84654	7.78406	7.79906	7.82033
Ccna2	7.63434	8.01586	7.58022	7.85016	7.86091	7.67599	7.5246	7.36757	7.68751	7.66916	7.73695	7.9977
Anapc1	7.89428	7.82904	7.8673	7.34241	7.77127	7.80459	7.82683	7.59171	7.58423	7.61712	7.73276	7.73733
Coro1c	7.54554	7.69639	7.5764	7.22917	7.86124	7.68361	7.85756	7.97687	7.77547	7.8173	7.82687	7.74697
Myadm	7.55683	7.89649	7.37047	7.31408	7.54083	7.76444	7.80808	7.81132	7.97651	7.62816	7.90607	7.9923
Ddost	7.70385	7.71161	7.48494	8.00228	7.70716	7.62773	7.5765	7.42284	7.65112	7.81367	7.73341	8.10854
Nrp2	7.35635	6.83105	7.83515	7.64982	8.03614	7.93026	7.80682	7.50428	7.31359	7.81549	8.03795	8.40859
Ncor1	7.86333	7.6199	7.94095	7.49737	7.87271	7.75307	7.85877	7.68728	7.2674	7.66916	7.79659	7.67169
Arf3	7.90387	7.72154	7.90713	7.23018	7.69687	7.682	7.79797	7.92922	7.68922	7.63228	7.90665	7.37241
Polr2a	8.2051	7.55431	8.12461	6.93211	7.86813	7.84572	7.86181	8.07889	7.44086	7.52229	7.59311	7.4294
Larp4	7.87204	7.67856	7.87535	7.43606	7.80417	7.61136	7.81529	7.53228	7.62724	7.69695	7.73114	7.74536
Atxn10	7.76861	7.80869	7.61229	7.66298	7.81882	7.50695	7.69591	7.69318	7.74332	7.78775	7.65477	7.66865
Dbnl	7.40165	7.60195	7.39381	7.89928	7.6231	7.56085	7.84043	7.67509	7.86557	8.04109	8.01316	7.5052
Luc7l2	8.01644	7.5583	7.89925	7.42991	7.75684	7.98902	7.71181	7.74346	7.67462	7.65033	7.56725	7.42259
Nomo1	7.84981	7.81129	7.76332	7.31361	7.78764	7.75197	7.68053	7.62752	7.61829	7.50853	7.72238	7.98363
Xpnpep1	7.76277	7.87744	7.7123	7.37522	7.80896	7.65523	7.68156	7.7625	7.73216	7.57637	7.76186	7.67506
Myo10	7.78214	7.51375	7.97883	7.07904	7.85332	7.88631	7.83365	7.86516	7.54699	7.60948	7.74114	7.68546
Tpp1	7.62322	7.68588	7.70094	7.71734	7.61453	7.73118	7.71885	7.49007	7.74537	7.46955	7.84342	8.02727
Elf2	7.736	7.95421	7.72989	7.64755	7.58335	7.82123	7.78748	7.61547	7.69136	7.60808	7.70108	7.48384
Atp1b3	7.42894	7.67815	7.44639	7.66895	7.58853	7.68499	7.73549	7.70277	7.90179	7.78128	7.81318	7.9126
Rpl38	7.61805	7.38425	7.66241	8.14391	7.86354	7.76226	7.7467	7.58805	7.94823	7.73511	7.3983	7.48537
Puf60	7.66889	7.94102	7.53992	7.79556	7.62852	7.60651	7.61442	7.60594	7.83268	7.66782	7.74114	7.66221
Scaf11	7.94054	7.89649	7.81503	7.27886	7.79903	7.66972	7.8392	7.67603	7.54274	7.62092	7.66936	7.54737
Sptlc2	7.60983	7.79145	7.57576	7.35172	7.56609	7.70827	7.76204	7.54505	7.801	7.68939	7.80645	8.0877
Pafah1b1	7.84981	7.8139	7.83088	7.31694	7.72246	7.66856	7.79321	7.76368	7.84232	7.57102	7.69843	7.41657
Mta1	7.81599	8.03446	7.76974	7.45866	7.6954	7.72269	7.73185	7.65421	7.66292	7.50105	7.69147	7.54037
Tex261	7.80619	7.75557	7.73017	7.58729	7.6697	7.66109	7.59121	7.719	7.72468	7.54322	7.62931	7.83367
Txndc5	7.7721	7.89509	7.64215	7.70938	7.80793	7.60869	7.40239	7.50463	7.49514	7.55339	7.55268	8.30385
Ncaph2	7.51437	7.87281	7.49947	8.15938	7.72789	7.55431	7.50727	7.57195	7.61604	7.80731	7.66225	7.74889
Tomm70a	7.769	7.80496	7.62622	7.74871	7.73437	7.51318	7.67915	7.59636	7.52418	7.8421	7.62305	7.76858
Rbbp4	7.51205	7.77591	7.47642	8.08534	7.69355	7.63965	7.49833	7.65262	7.63436	7.96639	7.63554	7.65779
Plin3	7.59589	7.37018	7.6342	7.7568	7.71447	7.69918	8.0212	7.88375	7.55733	7.99225	7.67777	7.31437
Fubp1	7.70953	7.64139	7.81665	7.73489	7.74011	7.80946	7.73516	7.79205	7.61379	7.6628	7.60868	7.34685
Spcs2	7.62622	7.76212	7.56005	8.09508	7.5042	7.56085	7.49442	7.29546	7.76456	7.85714	7.60021	8.075
Tnks2	7.98736	7.78047	7.97787	7.46511	7.64697	7.68798	7.70709	7.77252	7.54888	7.49352	7.60974	7.50141
Hgsnat	7.89997	7.57811	7.79572	7.34521	7.79971	7.6337	7.72086	7.87449	7.78189	7.74148	7.51448	7.47265
Setd5	8.0246	7.78465	7.88928	7.34241	7.69133	7.85188	7.79956	7.50463	7.49612	7.59231	7.5899	7.58226
Psmd1	7.57871	7.76212	7.59288	7.50658	7.83164	7.54547	7.68841	7.60397	7.68323	7.80275	7.84162	7.70505
Mef2d	7.96312	7.84038	7.84286	7.09744	7.75045	7.72201	7.86302	8.12537	7.50246	7.56061	7.48486	7.35402
Khdrbs1	7.69038	7.86136	7.70648	7.49022	7.7807	7.68912	7.5923	7.7083	7.72175	7.55881	7.72693	7.5591
Arpc4	7.41957	7.67325	7.45543	7.98711	7.77687	7.59014	7.58314	7.67979	7.76131	7.92418	7.70306	7.52551
Msmo1	7.92005	7.81167	7.95671	7.77041	7.49914	7.51447	7.58938	7.11	8.00632	7.47529	7.54975	7.87176
Ghitm	7.96753	7.74431	7.80663	7.76624	7.43114	7.62461	7.83488	7.69721	7.68409	7.76511	7.59666	7.14388
Dcaf7	7.76082	7.6875	7.89849	7.20263	7.73689	7.74669	7.72553	7.8452	7.65332	7.45722	7.80337	7.51313
Kif5b	7.73361	7.80159	7.78885	7.26462	7.75754	7.60966	7.73946	7.50781	7.65987	7.63707	7.77007	7.75081
Vps35	7.65887	7.77324	7.6818	7.66073	7.62193	7.55406	7.67467	7.58337	7.67549	7.89648	7.6734	7.53444
Nf2	7.74787	7.81167	7.77808	7.2577	7.71738	7.76444	7.66533	7.82015	7.69221	7.51673	7.62026	7.58727
Dnajc3	7.61546	7.66299	7.6253	7.58176	7.66329	7.65406	7.61981	7.17983	7.58744	7.67349	7.87567	8.23427
Psmb1	7.4509	7.56096	7.44149	8.32252	7.70716	7.42004	7.68636	7.53954	7.59613	8.05981	7.58311	7.5912
Ehmt2	7.69611	7.8349	7.74301	7.48472	7.67831	7.71121	7.68122	7.74197	7.63036	7.48216	7.73244	7.52961
Ctsa	7.54735	7.49535	7.44114	7.79999	7.69503	7.61136	7.78652	7.72447	7.62501	7.81579	7.79256	7.60964
Rpl39	7.47824	7.41883	7.64458	8.31206	7.72319	7.59725	7.59668	7.65166	7.71757	7.86562	7.51523	7.41978
Snrnp70	7.74471	7.6393	7.61292	7.25869	7.84369	7.87707	7.6119	7.84185	7.83654	7.52819	7.48025	7.65575
Glmp	7.4475	7.80683	7.63083	7.6022	7.60866	7.69576	7.71214	7.49577	7.9139	7.35086	7.87567	7.78302
Ckap5	7.99767	7.85272	7.85079	7.21341	7.70973	7.77744	7.80177	7.59934	7.60612	7.45218	7.58776	7.47342
Prrc2c	7.85859	7.30142	7.92276	7.14699	7.9174	7.76051	7.94084	7.577	7.41629	7.66749	7.72076	7.68813
Capza1	7.60853	7.5916	7.54417	7.94125	7.64964	7.46334	7.65207	7.57093	7.40019	7.90132	7.68681	7.87206
Cdkn1a	8.27896	7.36512	8.29275	7.68563	8.06586	7.47776	7.28794	8.43726	6.73816	7.42553	7.23409	7.57578
Itm2b	7.15292	7.34676	7.22024	7.54649	7.33725	7.38846	8.03659	7.80387	7.77386	8.16684	8.29301	7.79639
Rnf187	7.45718	7.8538	7.48052	7.87073	7.76566	7.50382	7.38647	7.55157	7.68151	7.55411	7.77855	7.96448
Snu13	7.26787	7.60967	7.3283	8.18879	7.73005	7.48887	7.40614	7.48004	7.70368	7.90416	7.63451	8.09652
Abce1	7.7075	7.79672	7.62067	7.52852	7.74083	7.51318	7.62339	7.4768	7.60974	7.74719	7.60551	7.86647
Map4	7.77132	7.6634	7.7204	7.07342	7.82153	7.64935	7.78204	7.87667	7.62008	7.63945	7.78417	7.41576
Ubr5	7.9505	7.65347	7.91648	7.07173	7.75294	7.74977	7.70743	7.77252	7.45198	7.54504	7.57736	7.63962
Clptm1	7.67512	7.70162	7.58403	7.54283	7.68948	7.55406	7.54438	7.64974	7.62143	7.59794	7.71259	7.89883
Cd164	7.71195	7.62032	7.5834	7.50575	7.55473	7.64534	7.67674	7.58671	7.67505	7.58773	7.62165	7.99662
Cul1	7.66138	7.72983	7.64792	7.68231	7.67682	7.58522	7.59886	7.59271	7.5399	7.74465	7.65613	7.64719
Fam174b	7.45138	7.6041	7.59949	7.67379	7.48937	7.54952	7.63194	7.4191	8.02438	7.6999	7.8937	7.71654
Stat3	7.68009	7.30142	7.57576	7.04326	7.7469	7.46066	8.02364	7.89593	7.63391	7.8586	8.15589	7.37655
Ctbp1	7.67843	7.91944	7.69889	7.43167	7.58375	7.6639	7.50533	7.54986	7.7507	7.52782	7.68213	7.72957
Ube2l3	7.54599	7.75981	7.58086	7.72847	7.63315	7.57879	7.54476	7.61448	7.73175	7.62713	7.62653	7.74953
Anp32a	7.62793	7.87637	7.56295	7.4552	7.79524	7.70895	7.48028	7.81275	7.87273	7.4444	7.51523	7.55251
Ppp5c	7.32552	7.66092	7.34749	7.80847	7.61101	7.55482	7.57244	7.41647	7.73009	7.82001	7.91037	7.91915
Ctnna1	7.71559	7.90314	7.68358	7.06947	7.78279	7.71347	7.66775	7.74855	7.76212	7.41442	7.57664	7.58333
Uap1l1	7.25295	7.73219	7.29847	7.8439	7.59922	7.5696	7.69046	7.47788	7.94143	7.79512	7.85118	7.52737
Shc4	7.89393	7.84692	7.89031	7.41443	7.70423	7.6014	7.6795	7.84799	7.59567	7.59196	7.46633	7.03634
Eif4e	7.38248	7.70482	7.35754	8.06339	7.66518	7.44199	7.44955	7.45575	7.56293	7.93506	7.62931	7.88725
Uqcr10	7.22037	7.3575	7.25412	8.38285	7.78522	7.5168	7.73185	7.38917	7.74784	8.17534	7.41853	7.55325
Ccdc47	7.94088	7.74704	7.82928	7.39383	7.60159	7.60796	7.62303	7.59669	7.58239	7.30945	7.44322	7.84149
C1qbp	7.45041	7.70041	7.39236	7.75399	7.688	7.55406	7.53719	7.48971	7.66162	7.68675	7.65135	7.91317
Ganab	7.67512	7.67815	7.69684	7.44697	7.66216	7.62173	7.5813	7.51133	7.55311	7.45024	7.68146	7.90544
Uba2	7.5004	7.76097	7.46027	8.00907	7.64506	7.54217	7.43414	7.43773	7.46601	7.90842	7.59097	7.70735
Mbp	7.41213	7.24966	7.43201	8.31182	7.90148	7.88951	7.201	7.77428	6.90271	7.16956	7.77228	8.43686
Atp6ap1	7.50833	7.61692	7.57927	7.71806	7.68353	7.53861	7.55717	7.56586	7.55264	7.62334	7.68747	7.81332
Mapk8ip1	7.32446	7.74236	7.5409	7.58255	7.637	7.39466	7.62589	7.5166	7.8538	7.64965	7.91322	7.65745
Dennd5a	7.93536	7.76941	7.95156	7.31456	7.65458	7.6543	7.63656	7.81617	7.41629	7.36289	7.46672	7.43179
Wdr26	7.84576	7.74898	7.82499	7.13192	7.64735	7.71211	7.79448	7.69008	7.49025	7.4634	7.57628	7.47651
Dynll1	7.24627	7.46872	7.44184	8.16017	7.905	7.48518	7.31476	7.67916	7.68965	7.61226	7.47987	7.89998
Swi5	7.41064	7.55742	7.42459	8.32583	7.62193	7.60772	7.73483	7.42434	7.64188	7.83943	7.42454	7.36866
Wls	7.56892	7.63636	7.68624	7.6411	7.44175	7.5992	7.69931	7.57868	7.58607	7.72229	7.68447	7.51689
Snx3	7.55322	7.70562	7.60325	7.87622	7.65572	7.52582	7.39947	7.55225	7.65112	7.64456	7.60586	7.56927
Pdap1	7.62836	7.76058	7.5853	7.71517	7.72246	7.69233	7.48225	7.50781	7.62724	7.53444	7.49175	7.58333
Timp2	7.55863	7.91461	7.61726	7.47367	7.43469	7.72089	7.48737	7.77193	7.79068	7.42593	7.45658	7.65779
Adgrl2	7.80164	7.86602	7.96209	7.08017	7.69761	7.73652	7.70945	7.41835	7.47	7.34877	7.55378	7.66527
Parvb	7.62407	7.65968	7.65065	7.29827	7.77896	7.6306	7.59668	7.76899	7.59293	7.40762	7.4764	7.80103
Uqcrc2	7.48912	7.61692	7.44883	8.04742	7.53589	7.44363	7.54627	7.37725	7.50973	7.99679	7.62896	7.64031
Scly	7.29348	7.65968	7.35754	7.93227	7.4915	7.58374	7.75096	7.39528	7.78909	7.64354	7.86097	7.52177
Cap1	7.57249	7.63594	7.51619	7.73596	7.65496	7.4577	7.68567	7.49185	7.4322	7.65539	7.82657	7.5801
Parp1	7.61503	7.7675	7.65307	7.33679	7.83399	7.63179	7.54966	7.54677	7.4555	7.52856	7.78292	7.54295
Abcf1	7.46631	7.64181	7.47608	7.38523	7.75117	7.61329	7.65941	7.64847	7.61649	7.56313	7.69545	7.71491
Mindy2	7.66305	7.43291	7.9046	7.47025	7.5396	7.61957	7.86544	7.52115	7.63169	7.58419	7.64587	7.33284
Rnf4	7.64115	7.6543	7.60168	7.52111	7.54616	7.52685	7.6266	7.59005	7.55686	7.69793	7.59914	7.61912
Sdhd	7.21354	7.35035	7.35382	8.19243	7.59369	7.48068	7.48186	7.43216	7.66379	8.16779	7.5231	7.70999
Sirpa	7.39914	7.66422	7.60106	7.67453	7.36769	7.69119	7.65417	7.43254	7.8132	7.44049	7.75074	7.66899
Ywhah	7.21468	7.58813	7.30656	7.76798	7.64544	7.47696	7.45679	7.51309	7.81751	7.75476	7.82535	7.77362
Mcm5	7.39663	7.77857	7.39634	7.63119	7.70936	7.51396	7.38984	7.475	7.58607	7.73957	7.69843	7.78895
Suz12	7.83801	7.82609	7.66631	7.24975	7.57575	7.6477	7.63443	7.6	7.53182	7.54139	7.48563	7.49036
Eif5b	7.59194	7.62244	7.602	7.09133	7.73796	7.64841	7.61478	7.87421	7.9139	7.38624	7.44834	7.53778
Smc4	7.59501	7.92323	7.49239	7.64414	7.57253	7.59014	7.62374	7.22985	7.56666	7.52709	7.65306	7.64031
Racgap1	7.67471	7.8213	7.45751	7.67972	7.71301	7.60699	7.36482	7.24812	7.52418	7.54904	7.62931	7.78396
Dkk3	7.57249	7.52104	7.60387	7.34986	7.36769	7.64699	8.08388	7.60989	7.65725	7.77601	7.87772	6.97532
Rasa3	7.69243	7.6543	7.88825	7.52358	7.68316	7.66577	7.43861	7.63497	7.45449	7.32776	7.53945	7.52289
Wbp11	7.75455	7.73807	7.62128	7.32217	7.64697	7.5778	7.51962	7.6631	7.51263	7.4176	7.57159	7.60893
Hectd1	7.71236	7.55609	7.72931	6.86732	7.56164	7.58349	7.85847	7.68666	7.54652	7.54867	7.79844	7.47536
Lrp6	8.01218	7.75904	8.01832	7.04498	7.66932	7.68591	7.52996	7.45319	7.35942	7.2848	7.34772	7.7444
Smad5	7.48393	7.74041	7.62437	7.70539	7.53795	7.77009	7.58644	7.5201	7.68537	7.42157	7.44677	7.38604
Pds5a	7.72723	7.60109	7.65367	7.36006	7.61765	7.61547	7.58791	7.53159	7.5606	7.55158	7.59026	7.50823
Psmb7	7.52544	7.65472	7.42495	7.8323	7.54534	7.39157	7.44551	7.56857	7.71001	7.75129	7.58669	7.4676
Cyb5r3	7.75651	7.43243	7.77614	7.38069	7.58335	7.5381	7.5691	7.96485	7.54605	7.51932	7.47176	7.34516
Pgd	7.53415	7.54986	7.61664	7.4826	7.61492	7.57681	7.52728	7.70369	7.68794	7.45412	7.63658	7.49112
Arhgef2	7.94398	7.75866	7.85474	7.29971	7.37185	7.7001	7.6795	7.61874	7.36425	7.35002	7.55999	7.367
Mogs	7.63647	7.7675	7.53402	7.20521	7.68948	7.46495	7.45196	7.64751	7.59248	7.40522	7.78417	7.65915
Chtop	7.5478	7.69357	7.52777	7.64793	7.45881	7.63775	7.52192	7.53505	7.69093	7.57137	7.52048	7.48191
Bub3	7.5213	7.79371	7.49104	7.76554	7.57855	7.50042	7.28704	7.43625	7.74084	7.50965	7.51973	7.66187
Mob1a	7.59326	7.64223	7.67109	7.45822	7.54575	7.47057	7.61442	7.42322	7.50197	7.67149	7.78666	7.42099
Hjurp	7.76861	7.66956	7.62591	7.43518	7.6561	7.80141	7.62231	7.32338	7.55639	7.51821	7.48486	7.33582
Rab14	7.63647	7.65762	7.66181	7.51033	7.53259	7.53581	7.67881	7.60496	7.47248	7.4852	7.54792	7.42259
Ppp2r5c	7.62708	7.61138	7.64792	7.52399	7.57213	7.52428	7.50183	7.59237	7.48238	7.47835	7.49709	7.68412
Snx1	7.33762	7.57855	7.39814	7.8613	7.59527	7.46254	7.63052	7.7984	7.54085	7.75256	7.56942	7.21321
Atp6v1f	7.40715	7.39966	7.3501	8.27139	7.50631	7.32373	7.65696	7.62752	7.68065	7.97533	7.46322	7.0695
Coa5	7.56042	7.62329	7.6458	7.35265	7.632	7.49308	7.58314	7.4979	7.49319	7.52006	7.67104	7.6372
Mbd3	7.49383	7.77133	7.46957	7.56703	7.75648	7.52839	7.28659	7.45758	7.64276	7.49088	7.55743	7.67675
Nsd2	7.54417	7.72825	7.65398	7.27984	7.56164	7.59651	7.58608	7.41233	7.50634	7.57137	7.64553	7.56092
Zfp207	7.53963	7.44351	7.60012	7.8472	7.70753	7.52016	7.44995	7.51449	7.39181	7.69367	7.49099	7.44172
Ndufb9	7.23451	7.30828	7.31537	8.20765	7.55311	7.39691	7.62696	7.40478	7.66857	8.05266	7.35194	7.49837
Arl8b	7.4538	7.51786	7.4754	7.75259	7.60001	7.37967	7.40323	7.47716	7.52991	7.64388	7.61044	7.76036
Lta4h	7.67761	7.88982	7.68624	7.57581	7.42448	7.6889	7.45317	7.3543	7.77949	7.26239	7.55926	7.20484
Atn1	7.75259	7.61777	7.78307	7.03634	7.6523	7.69325	7.67502	7.64751	7.47793	7.30988	7.62026	7.28952
Copb2	7.80619	7.77362	7.63665	7.26265	7.62154	7.46334	7.54022	7.57127	7.55217	7.40923	7.47717	7.39588
Tcea1	7.51483	7.51055	7.3501	8.02576	7.4124	7.38818	7.60793	7.45282	7.41989	7.95574	7.48755	7.38192
Nudt3	7.37688	7.56007	7.43939	7.75223	7.62232	7.50382	7.57429	7.48578	7.70706	7.47415	7.55597	7.4555
Ubr4	7.74392	7.24472	7.85631	6.86472	7.56487	7.62413	7.6401	7.82751	7.40332	7.4444	7.67643	7.59939
Fkbp3	7.49195	7.69559	7.33322	7.81691	7.51972	7.54902	7.39445	7.53816	7.66987	7.72711	7.26033	7.48767
Rdx	7.53507	7.44639	7.46717	7.39788	7.57895	7.53759	7.60286	7.43179	7.48927	7.63228	7.61816	7.72502
Gyg	7.16005	7.63258	7.27273	7.60376	7.28913	7.46843	7.83674	7.45319	7.8716	7.78529	7.94926	7.12576
Tnpo3	7.74234	7.66257	7.62283	7.33114	7.70643	7.50251	7.43414	7.48363	7.40228	7.45916	7.52048	7.57722
Chmp4b	7.52038	7.67161	7.4253	7.49359	7.47783	7.43435	7.62589	7.68104	7.66336	7.56492	7.65987	7.21599
Dld	7.65551	7.52377	7.52744	7.58136	7.47181	7.4206	7.38815	7.54608	7.60022	7.63193	7.40683	7.67338
Rbm25	7.75495	7.56184	7.65095	7.26018	7.62542	7.78948	7.64398	7.32818	7.58055	7.44166	7.30881	7.4711
Gm10053	7.11186	7.59203	7.17	7.90531	7.40022	7.25937	7.16214	7.41384	7.77386	8.05317	7.67609	7.89478
Rps28	7.54281	7.3732	7.6461	7.77562	7.66216	7.69325	7.63585	7.54917	7.76294	7.37154	7.1692	7.22751
Smg5	7.506	7.62668	7.54155	7.60103	7.54902	7.63346	7.44186	7.13076	7.44744	7.44752	7.63416	7.84089
Dars	7.51714	7.59721	7.37707	7.62505	7.50925	7.38138	7.54325	7.52254	7.53182	7.81065	7.61536	7.33795
Cox7c	7.60331	7.42467	7.48901	7.85377	7.52969	7.5353	7.59995	7.48327	7.78909	7.71842	7.09273	7.24803
Snrnp200	7.93605	7.49396	7.79325	6.86211	7.75578	7.58842	7.66706	7.71167	7.34593	7.39111	7.47292	7.33412
Dnajc5	7.89677	7.5998	7.77892	7.13786	7.58095	7.52428	7.68909	7.59171	7.34159	7.42712	7.52385	7.2321
Rnps1	7.62922	7.90488	7.4182	7.4664	7.55961	7.45527	7.39989	7.42882	7.59841	7.38136	7.45031	7.61105
Marcks	7.58666	7.68629	7.60949	7.28811	7.4932	7.61643	7.3437	7.37145	7.63391	7.4004	7.71782	7.55361
Cul7	7.58446	7.48093	7.70064	6.86407	7.6757	7.52377	7.62803	8.00762	7.51794	7.46378	7.51673	7.32942
Ube2q1	7.41362	7.53552	7.55391	7.51573	7.51972	7.50278	7.50921	7.59835	7.55592	7.54795	7.49175	7.52177
Ube2z	7.67637	7.6271	7.62128	7.39833	7.58932	7.38959	7.4321	7.57464	7.62143	7.38217	7.59346	7.31566
Tgoln1	7.77636	7.59073	7.76192	7.28763	7.63931	7.36711	7.62231	7.39833	7.30135	7.41122	7.51034	7.54221
Vdac3	7.46535	7.62202	7.40354	7.55901	7.40384	7.33257	7.4321	7.6259	7.63524	7.62713	7.43808	7.61982
Nme1	7.22887	7.64432	7.30618	7.8817	7.51093	7.31037	7.11154	7.41384	7.79267	7.66782	7.43768	7.8573
Adipor1	7.51761	7.61053	7.52975	7.72022	7.56407	7.41589	7.39362	7.55737	7.40904	7.43539	7.4448	7.55654
Ahsa1	7.11797	7.48746	7.15428	7.84852	7.46706	7.44227	7.31742	7.48435	7.67721	7.68047	7.72043	7.73797
Mthfd2	8.16522	8.28825	7.75009	7.42285	7.03396	7.63203	7.5624	7.0517	7.54746	7.11616	7.32047	7.24167
Hcfc1	7.72202	7.59678	7.77142	6.9543	7.63739	7.65453	7.61694	7.37106	7.27426	7.35751	7.55049	7.58799
Snx5	7.17478	7.44255	7.13493	7.88331	7.30277	7.455	7.50727	7.45356	7.56991	7.91096	7.6136	7.63859
Celf1	7.54008	7.60881	7.6594	7.24375	7.57735	7.57333	7.51847	7.38917	7.43781	7.42078	7.55085	7.55654
Aldh2	7.78982	7.80384	7.74727	7.27299	7.45751	7.64888	7.58571	7.65357	7.54274	7.1771	7.37985	7.00722
Git1	7.49946	7.62837	7.49341	6.99293	7.60395	7.45473	7.61442	7.69349	7.34214	7.53444	7.61431	7.59085
Nhp2	7.20035	7.47296	7.14743	8.13016	7.58733	7.35559	7.16067	7.29791	7.5517	7.8489	7.44795	7.85314
Trak2	7.55548	7.50136	7.68062	7.32784	7.69614	7.52145	7.5624	7.39795	7.38286	7.37195	7.42174	7.62331
Plekha5	7.58798	7.67775	7.64184	7.48726	7.46792	7.63489	7.7145	7.46813	7.51938	7.38543	7.49633	6.94827
Psat1	7.78752	7.80981	7.47266	8.03301	7.08106	7.43763	7.50183	7.18865	7.38866	7.59196	7.39258	7.33965
Cox6c	7.48676	7.43291	7.49644	7.67342	7.46402	7.50251	7.54022	7.55396	7.78869	7.71065	7.13343	7.21923
Suclg2	7.63221	7.73846	7.54221	7.45779	7.48511	7.41894	7.51577	7.38917	7.53658	7.48747	7.48179	7.30134
Atp6v0b	6.90969	7.43581	6.98593	8.39078	7.43425	7.42886	7.50533	6.98538	7.77667	7.98744	7.56217	7.58226
St3gal6	7.26732	7.46447	7.28175	7.7976	7.35466	7.53581	7.69319	7.32818	7.63436	7.69038	7.48793	7.43855
Gps1	7.3548	7.6372	7.29227	7.74942	7.56649	7.41034	7.26291	7.35821	7.46451	7.58985	7.69645	7.58835
Tmem59	7.59018	7.41001	7.51286	7.65397	7.37969	7.4349	7.46958	7.665	7.51794	7.59407	7.36742	7.36616
Pdcd6ip	7.58225	7.56007	7.63329	7.10628	7.58972	7.49256	7.55567	7.69349	7.47347	7.37972	7.5313	7.35191
Sae1	7.28807	7.75518	7.32147	7.53098	7.50925	7.47483	7.28433	7.40743	7.73961	7.4184	7.52795	7.6918
Txn2	7.27117	7.53192	7.26286	7.9748	7.48639	7.33814	7.27662	7.39566	7.57177	7.53883	7.47987	7.78365
Cyp2j6	7.36922	7.41834	7.46579	7.75083	7.64123	7.43654	7.19138	7.3586	7.3981	7.614	7.33246	7.92085
Sec13	7.48251	7.40065	7.35605	7.91697	7.45053	7.30858	7.40573	7.30523	7.41318	7.86474	7.48102	7.49036
Hbb-bs	6.96702	6.59138	6.25869	8.94225	10.9919	7.6969	5.33434	6.7829	7.54227	8.47443	6.21317	8.07296
Ube2i	7.42599	7.53462	7.38583	7.75047	7.60119	7.46334	7.24536	7.4191	7.37385	7.44049	7.38685	7.81759
Slk	7.52682	7.53822	7.55908	7.21545	7.4369	7.58743	7.69421	7.45758	7.42657	7.34794	7.5629	7.48844
Clic4	7.82162	7.71956	7.45439	7.24175	7.15917	7.48438	7.70067	7.28521	7.32793	7.47032	7.81715	7.34981
Nucb1	7.50133	7.5078	7.42069	7.42462	7.44614	7.43133	7.40364	7.52254	7.47496	7.37972	7.59275	7.71392
Prdm16	7.59326	7.58943	7.55618	7.35172	7.8052	7.47829	7.50105	7.8354	7.33833	7.24994	7.33586	7.18086
Ppargc1a	6.89482	7.40411	7.18597	7.04268	7.36072	7.24039	8.24129	7.37184	8.007	7.84181	7.84372	7.37986
Huwe1	7.60201	7.3732	7.68801	7.05984	7.59646	7.57333	7.60503	7.38457	7.19643	7.47262	7.61431	7.63617
Glrx3	7.33079	7.44926	7.26918	8.12637	7.53795	7.30739	7.34109	7.28356	7.39181	7.85332	7.31832	7.58118
Pafah1b2	7.50926	7.4856	7.53304	7.65397	7.51679	7.4612	7.38098	7.44842	7.35996	7.60004	7.42933	7.39996
Hmgcs1	8.02752	7.56582	8.2879	7.0723	7.60984	7.34864	7.46758	7.1983	7.57362	6.94185	7.38315	7.29478
Csnk1d	7.60418	7.69639	7.60356	7.17245	7.47568	7.51964	7.45799	7.56586	7.58607	7.28087	7.55012	7.24983
Ap2a1	7.53781	7.63426	7.57481	6.93955	7.55596	7.50981	7.48422	7.55737	7.52514	7.37195	7.58239	7.47187
Bclaf1	7.51529	7.30247	7.50149	7.38931	7.62968	7.63537	7.54778	7.35312	7.27938	7.51375	7.54902	7.50898
Nploc4	7.52636	7.53822	7.50484	7.18502	7.51051	7.40084	7.41319	7.40743	7.49221	7.44791	7.61044	7.67473
Samm50	7.53872	7.50366	7.45022	7.34661	7.58454	7.43106	7.28975	7.64974	7.54227	7.44557	7.47369	7.44764
Ptges3	7.20438	7.53327	7.0874	7.73275	7.60984	7.35096	7.40198	7.31896	7.53753	7.70218	7.56181	7.64307
Dynll2	7.49571	7.42224	7.65699	6.9451	7.4932	7.44335	7.48697	7.53678	7.61379	7.51077	7.74049	7.32556
Pole4	7.32763	7.51877	7.23364	7.98741	7.31002	7.43106	7.45398	7.26533	7.70706	7.81246	7.54461	7.05561
Rock2	7.59764	7.56758	7.58467	6.9965	7.58375	7.47643	7.70168	7.54814	7.38708	7.45218	7.44085	7.28246
Usp5	7.49336	7.56934	7.3767	7.37978	7.63739	7.39691	7.44834	7.44842	7.43832	7.40722	7.53204	7.47845
Metap2	7.46487	7.71002	7.45993	7.28227	7.53671	7.46629	7.31033	7.55703	7.56526	7.32268	7.3435	7.57974
Clptm1l	7.47681	7.59376	7.36936	7.45477	7.57414	7.36568	7.27934	7.373	7.35942	7.43067	7.4145	7.89825
Ipo9	7.50786	7.52694	7.46957	7.26462	7.63816	7.52505	7.41815	7.30564	7.30693	7.4283	7.59879	7.59903
Psen2	7.39461	7.53237	7.47505	7.45952	7.51051	7.59725	7.43658	7.49043	7.59522	7.19299	7.43132	7.46877
Srp72	7.72041	7.52104	7.72529	7.45995	7.50336	7.3774	7.58314	7.45392	7.1065	7.38258	7.43331	7.31177
Atp6v0e2	7.45959	7.61266	7.47608	7.72417	7.43955	7.38081	7.20865	7.4605	7.5879	7.30429	7.27193	7.64891
Tra2b	7.45621	7.51558	7.50048	7.60025	7.50799	7.36539	7.26475	7.48112	7.38603	7.61226	7.47524	7.40889
Atp5h	7.02411	7.2214	7.12929	8.18957	7.39841	7.34864	7.39571	7.37493	7.69008	7.96121	7.39871	7.43139
L3mbtl2	6.99452	7.37974	7.16746	7.507	7.35466	7.58522	7.72453	7.30847	7.78549	7.5003	7.76661	7.48844
Acsl3	7.8695	7.81612	7.83622	7.43868	7.31628	7.55129	7.35236	7.11186	7.50294	7.02408	7.23728	7.50065
Gusb	7.2015	7.64307	7.36863	7.39788	7.48554	7.38337	7.31343	7.36835	7.61784	7.36825	7.63865	7.76131
Ppid	7.27171	7.51649	7.21656	7.47921	7.63431	7.44281	7.29604	7.14352	7.60838	7.53481	7.47253	7.88521
Tex2	7.38603	7.42078	7.38765	7.38114	7.48724	7.38874	7.67226	7.42509	7.49074	7.3838	7.53241	7.50406
Cox6b1	7.06771	7.1834	7.26602	7.94094	7.37462	7.32078	7.41567	7.42434	7.69902	7.8188	7.367	7.56456
Gys1	8.1233	7.83855	7.85316	7.17403	7.38519	7.56536	7.69319	7.56383	7.36478	7.14431	7.3316	6.38089
Map2k1	7.62236	7.59289	7.59099	7.30452	7.42893	7.40056	7.43821	7.71656	7.36746	7.44596	7.5788	6.91901
Dnaja2	7.44118	7.70081	7.41322	7.31742	7.5588	7.27382	7.3489	7.5543	7.46152	7.49012	7.38274	7.46137
Atad2	7.44021	7.56007	7.40247	7.30596	7.46142	7.58151	7.45759	7.28603	7.33122	7.47108	7.56435	7.50709
Scarb1	7.77326	7.52921	7.76472	7.3775	7.55025	7.5353	7.2652	7.68104	6.98646	7.17287	7.32605	7.40118
Api5	7.40765	7.4935	7.44848	7.46725	7.4338	7.30529	7.4136	7.39757	7.39653	7.55447	7.55597	7.44764
Nfic	7.56401	7.20224	7.70706	6.89881	7.71411	7.52402	7.63797	7.5166	6.96897	7.49729	7.60056	7.47922
Rsl1d1	7.40115	7.43388	7.25332	7.62236	7.41912	7.34136	7.31122	7.46595	7.40019	7.67914	7.38026	7.58692
Raver1	7.49195	7.58726	7.51186	7.053	7.57092	7.54648	7.48579	7.37416	7.31636	7.28218	7.51673	7.5199
Celf2	7.60462	7.73336	7.6573	7.0706	7.32776	7.65006	7.55004	7.3105	7.57593	7.19066	7.46594	7.11835
Poldip3	7.43923	7.38574	7.43834	7.52564	7.46965	7.29538	7.44632	7.46958	7.38075	7.47911	7.53612	7.38645
Baz1b	7.42451	7.50412	7.54775	7.16877	7.51261	7.52274	7.45799	7.32578	7.42195	7.41122	7.56689	7.3557
Tra2a	7.2418	7.14968	7.5497	7.713	7.51261	7.4695	7.2537	7.71534	7.501	7.65033	7.24501	7.21784
Mbnl2	7.76511	7.35444	7.73903	7.14431	7.43999	7.55759	7.60973	7.56009	7.16421	7.31287	7.45423	7.11488
Tmf1	7.26677	7.25569	7.26839	7.45736	7.44043	7.31751	7.85999	7.36095	7.63214	7.64897	7.54571	7.16128
Tor1aip2	7.29941	7.49905	7.16152	7.27641	7.42848	7.3845	7.58938	7.49043	7.652	7.55664	7.57664	7.29697
Rps27l	6.96837	7.01344	7.0941	8.29598	7.53465	7.33726	7.34153	7.16649	7.56713	7.96339	7.20085	7.72405
Pitpna	7.24627	7.42662	7.3004	7.55256	7.38702	7.35241	7.36695	7.46414	7.50343	7.49352	7.6129	7.48345
Slc39a7	7.69243	7.32192	7.50182	7.04153	7.33109	7.47297	7.45357	7.40326	7.48828	7.33578	7.39789	7.74857
Tram1	7.22887	7.48792	7.27862	7.59947	7.32155	7.32698	7.27662	7.05605	7.4054	7.59724	7.57916	8.01456
Megf8	7.72683	7.65347	7.84973	6.78097	7.54042	7.62461	7.39529	7.51695	7.32354	7.03967	7.2706	7.44527
Dnajc7	7.54372	7.5768	7.48392	7.20572	7.46055	7.47377	7.43128	7.42434	7.58055	7.20225	7.31832	7.45707
Rap2b	7.6146	7.73689	7.7227	7.49106	7.42091	7.57805	7.44914	7.18425	7.47843	7.16436	7.25943	6.99703
Mfsd5	7.19516	7.42321	7.31576	7.32501	7.40022	7.38393	7.40489	7.51554	7.652	7.40762	7.45188	7.62052
Ociad1	7.28209	7.38824	7.30656	7.73418	7.26794	7.35125	7.4783	7.34406	7.45851	7.63672	7.44045	7.39874
Zc3h14	7.63434	7.69639	7.40462	7.33538	7.3158	7.34689	7.4854	7.3629	7.40436	7.34041	7.42454	7.32856
Sod1	7.36922	7.40756	7.33887	7.70866	7.47181	7.35212	7.33499	7.48327	7.58469	7.4707	7.30404	7.22015
Derl1	7.50273	7.43678	7.40103	7.54486	7.21381	7.39663	7.40239	7.19305	7.45951	7.37359	7.44361	7.67439
Tomm40	7.36357	7.5512	7.28058	7.28908	7.53795	7.28023	7.1962	7.30483	7.51697	7.49766	7.49518	7.72405
Napa	7.31705	7.4334	7.23566	7.65547	7.3415	7.32344	7.46599	7.24728	7.54605	7.45024	7.54939	7.47032
Ppt2	7.384	7.4526	7.25849	7.60103	7.41733	7.33639	7.28116	7.39299	7.45951	7.33705	7.39952	7.71491
Usp9x	7.72763	7.45736	7.73161	6.98337	7.44219	7.37026	7.56724	7.57868	7.22677	7.32819	7.40359	7.20857
Ldlr	7.94398	7.5032	8.0515	6.85427	7.57012	7.54522	7.42391	7.04686	7.38708	6.87274	7.36867	7.4429
Fmn1	7.47586	7.27037	7.50115	7.049	7.30519	7.75175	7.84197	7.33336	7.32078	7.43735	7.4764	7.21784
Nolc1	7.1992	7.3344	7.22146	7.14806	7.75967	7.45176	7.47355	7.47932	7.33887	7.40361	7.45266	7.70274
Nrd1	7.59589	7.54002	7.41036	7.1777	7.52346	7.38761	7.47751	7.38111	7.43271	7.23602	7.45149	7.34854
Psmd4	7.23451	7.42807	7.13709	7.77527	7.42314	7.20938	7.3502	7.3884	7.48484	7.6223	7.45736	7.43775
Smarca5	7.56848	7.68304	7.48969	7.10628	7.53176	7.31722	7.29065	7.45026	7.35242	7.35585	7.34561	7.43059
Insc	7.04543	7.58596	7.11575	7.89419	7.37969	7.28023	7.24024	7.31332	7.55358	7.62987	7.41208	7.45511
Sub1	7.26732	7.49581	7.2946	7.97057	7.35325	7.34457	7.22712	7.34485	7.61109	7.55158	7.2975	7.14485
Dhcr7	7.37841	7.34265	7.61664	7.36052	7.46229	7.36194	7.28704	6.89876	7.48188	7.22106	7.6653	7.79763
Emc3	7.32711	7.50274	7.31576	7.60454	7.41015	7.30888	7.24861	7.18689	7.43373	7.53114	7.34983	7.65336
Naa15	7.42894	7.38674	7.33736	7.15286	7.55799	7.32137	7.45759	7.38457	7.4137	7.42078	7.44164	7.56383
Slc6a8	7.21011	7.1994	7.40713	6.94078	7.60001	7.22021	7.44914	7.61612	7.38813	7.6285	7.38849	7.79763
Atp5j	7.26512	7.38224	7.39091	7.70539	7.35606	7.3026	7.28523	7.34169	7.53563	7.63365	7.37779	7.26825
Wdfy1	7.33185	7.4842	7.40283	7.03865	7.55677	7.43106	7.58681	7.5187	7.41989	7.54831	7.30621	7.21275
Atic	7.28861	7.49951	7.21288	7.12596	7.56931	7.38365	7.292	7.43216	7.56387	7.40843	7.5231	7.53704
Appl2	7.88356	7.35035	7.77531	7.49106	7.35232	7.76226	7.4956	7.63335	7.29125	7.22743	7.0002	6.5738
Psmb3	7.09399	7.31564	7.01774	8.03562	7.40745	7.18225	7.18607	7.4786	7.36959	7.77166	7.41289	7.56347
Nr4a1	8.25031	7.96093	7.69478	6.77406	7.21535	7.5124	7.45438	8.33246	7.33942	6.71211	6.68129	6.8839
Ppp1r14b	7.30477	7.54539	7.33095	7.4664	7.70826	7.35212	6.87433	7.34683	7.49807	7.30988	7.15239	7.90888
Nup50	7.36151	7.49118	7.29343	7.38841	7.45707	7.33726	7.34066	7.20875	7.43475	7.38095	7.5231	7.57614
Usp19	7.50693	7.40608	7.55099	6.9414	7.34716	7.46173	7.51269	7.73866	7.46451	7.38299	7.45854	6.99433
Manf	7.22094	7.15438	7.20424	7.75469	7.38794	7.33169	7.09255	6.76176	7.66943	7.7383	7.46982	7.97709
Copz1	7.45766	7.45783	7.48222	7.51821	7.36258	7.32875	7.24861	7.45026	7.4809	7.16673	7.38191	7.41938
Kdm3a	7.74274	7.49164	7.69918	7.47367	7.23783	7.49702	7.57281	7.46268	7.28448	7.31116	7.28257	6.67826
Macf1	7.69161	7.13549	7.74102	6.84109	7.4774	7.5894	7.40988	7.50074	7.16113	7.14142	7.37074	7.66595
Zfp706	7.25628	7.41883	7.3104	7.45693	7.42981	7.3023	7.22665	7.27944	7.49514	7.46725	7.49557	7.57217
Psmd7	7.13374	7.43049	7.15343	7.6022	7.50757	7.21894	7.22853	7.38955	7.49759	7.5454	7.3889	7.60222
Cope	7.46966	7.46116	7.37304	7.76902	7.4097	7.22528	7.35494	7.44327	7.36692	7.51189	7.29137	7.01363
Gabarap	7.21297	7.32088	7.22553	7.84983	7.29694	7.30019	7.37079	7.33296	7.55826	7.37441	7.4864	7.32813
Map2k2	7.21753	7.51786	7.29847	7.29392	7.48212	7.41367	7.25416	7.31735	7.4695	7.2699	7.56544	7.55288
Tbx2	7.76472	7.81278	7.56263	6.64736	7.43425	7.1842	7.51384	7.71381	7.46551	7.07892	7.4444	7.01522
Ndufa9	7.34961	7.39818	7.32527	7.47623	7.34575	7.26215	7.27571	7.40326	7.45399	7.5902	7.29968	7.45079
Asns	8.03981	7.97793	7.56809	7.62966	6.79162	7.35067	7.52154	7.44401	7.39653	7.16531	7.09424	6.63392
Ptbp3	7.42204	7.4621	7.42778	7.21034	7.39477	7.32432	7.4956	7.30685	7.2674	7.3197	7.56362	7.41818
Glyr1	7.37433	7.43098	7.42919	7.46768	7.47094	7.45527	7.37717	7.32578	7.27255	7.35294	7.3316	7.3161
Tmx2	7.30692	7.31931	7.28682	7.40908	7.29743	7.25348	7.3081	7.229	7.53658	7.5392	7.37074	7.71883
Csk	7.15649	7.48513	7.22919	7.32831	7.44307	7.34893	7.35279	7.38725	7.34105	7.3341	7.61044	7.54921
Psmc4	7.15886	7.37673	7.17548	7.71625	7.407	7.22971	7.22004	7.30117	7.34864	7.61608	7.48908	7.51389
Cops2	7.44216	7.47013	7.39019	7.44957	7.27537	7.23475	7.44186	7.39146	7.28843	7.4346	7.30142	7.41938
Fat1	7.72803	7.24692	7.83249	6.62294	7.3975	7.57383	7.34327	7.48076	7.19943	7.10731	7.30273	7.6868
Nudc	7.23113	7.59289	7.20341	7.20521	7.47094	7.3258	7.25185	7.26282	7.61199	7.24053	7.49709	7.60752
Atp6v1d	7.20208	7.5711	7.3745	7.4413	7.24239	7.28722	7.3932	7.39566	7.66205	7.33452	7.38808	7.19642
Akr1b3	7.14096	7.4842	7.02102	7.88459	7.37555	7.2541	7.1783	7.14489	7.46701	7.69859	7.45658	7.37033
Lamc1	7.63136	7.42856	7.61974	6.78166	7.4915	7.44281	7.25139	7.29832	7.15062	7.06528	7.41087	7.89507
Traf4	7.4171	7.4673	7.57863	7.16929	7.3737	7.41228	7.04743	7.31171	7.37969	7.16862	7.24908	7.86292
Iars	7.98602	7.80645	7.68654	6.9683	7.24995	7.47749	7.57095	7.1816	7.10842	7.11763	7.24908	7.03267
Wdr6	7.73122	7.56273	7.79215	6.93087	7.42002	7.51939	7.45639	7.53574	7.3981	6.94792	7.30794	6.82505
Grina	7.34858	7.16489	7.39381	7.0796	7.2729	7.30888	7.72753	7.6066	7.3356	7.4012	7.47794	7.3083
Fermt2	7.58136	7.68791	7.40606	7.31837	7.39795	7.35386	7.34109	7.32618	7.21435	7.30343	7.3574	7.13656
Uqcrfs1	7.36819	7.39421	7.39055	7.45779	7.27141	7.2643	7.12019	7.51484	7.40696	7.48368	7.28433	7.43378
Nek9	7.44167	7.38174	7.53796	6.99174	7.26446	7.4477	7.54363	7.43995	7.35188	7.33241	7.51786	7.13803
Csnk2a1	7.50414	7.4856	7.45404	7.08688	7.44527	7.45365	7.4447	7.46523	7.33887	7.19577	7.23728	7.27671
Hnrnpd	7.39058	7.73415	7.34562	6.86991	7.56204	7.45122	7.33368	7.2174	7.54935	7.2544	7.29005	7.37074
Itm2c	7.44896	7.45641	7.37853	7.43079	7.28718	7.26892	7.31299	7.51133	7.28221	7.29393	7.40683	7.27537
St6gal1	7.23282	7.464	7.24812	7.24425	7.19774	7.3774	7.59777	7.45466	7.62902	7.26681	7.464	7.17658
Rtkn	7.4687	7.39818	7.44429	7.44087	7.51554	7.3774	7.19812	7.54951	7.2674	7.26946	7.32947	7.06899
Serinc3	7.46391	7.25787	7.43974	7.12215	7.08332	7.31335	7.50843	7.55532	7.27938	7.39273	7.49595	7.38604
Mcm7	7.27336	7.60924	7.114	7.45001	7.4391	7.37882	7.23463	7.21005	7.36211	7.42514	7.34604	7.44922
Atp5j2	6.9265	7.39123	7.03408	8.02197	7.35839	7.14827	7.21103	7.13305	7.57038	7.78066	7.2083	7.49341
Spcs3	7.30638	7.50366	7.2137	7.59634	7.29109	7.19329	7.07906	6.99949	7.34376	7.56061	7.29181	7.89421
Ubtf	7.29023	7.50182	7.43201	7.19126	7.51261	7.26892	7.1962	7.48219	7.4028	7.23376	7.39504	7.35696
Clstn1	7.65551	7.67571	7.64123	6.99531	7.40429	7.47563	7.20531	7.39833	7.34972	6.90658	7.10626	7.4294
Igf2r	7.62365	7.19085	7.69801	6.7503	7.53424	7.50304	7.40114	7.30685	7.00786	7.09543	7.3269	7.78708
Eif4g3	7.55187	7.17764	7.59886	6.87574	7.47568	7.62245	7.48501	7.49221	7.27369	7.25083	7.18488	7.23575
Vapa	7.44118	7.52604	7.24812	7.21085	7.39659	7.29809	7.37632	7.40251	7.38075	7.32268	7.35698	7.26288
Ecpas	7.51437	7.36664	7.46027	7.01245	7.37047	7.23569	7.50649	7.4947	7.18557	7.42909	7.45227	7.17706
Wars	7.40465	7.26658	7.3351	7.21136	7.36026	7.22939	7.36823	7.18337	7.33341	7.43382	7.61711	7.46137
Crk	7.34076	7.31407	7.45577	7.38614	7.30325	7.26338	7.38689	7.22728	7.29462	7.55013	7.37861	7.30352
Pax3	7.60375	7.64849	7.51785	7.10076	7.2729	7.33375	7.57058	7.36368	7.57177	7.18926	7.31487	6.70488
Pnn	7.34128	7.15496	7.40283	7.1777	7.58335	7.548	7.27252	7.24812	7.41215	7.26239	7.31832	7.4602
Higd1a	7.72162	7.29983	7.62005	7.62005	7.4115	7.35906	7.39403	7.4979	7.38761	7.47108	7.15674	6.21761
Ssbp4	7.33762	7.70322	7.25372	7.24025	7.49702	7.30858	7.3489	7.32738	7.35512	7.21741	7.27903	7.27315
Iars2	7.46583	7.47999	7.46957	7.07342	7.45577	7.27168	7.2537	7.52672	7.15681	7.30429	7.25808	7.41576
Spen	7.54871	7.04983	7.71346	7.12106	7.52138	7.71999	7.59668	6.63771	6.78689	7.34836	7.33459	7.70241
Morf4l2	7.41113	7.29558	7.27744	7.51116	7.25397	7.26646	7.27707	7.28686	7.29012	7.46802	7.30794	7.42219
Kcmf1	7.40465	7.56934	7.23849	7.60415	7.31724	7.14259	7.13431	7.21395	7.37012	7.5104	7.25584	7.25525
Dnajc10	7.41908	7.43001	7.415	7.54446	7.19408	7.26615	7.26704	7.17229	7.23499	7.34752	7.30229	7.41697
Myl12a	7.09832	7.30828	7.02336	7.59516	7.30809	7.22655	7.20531	7.31695	7.49905	7.61954	7.39789	7.39343
Arf5	7.24236	7.4935	7.13016	7.84885	7.28669	7.09905	7.05487	7.38342	7.54132	7.45335	7.24682	7.20437
Ptp4a2	7.40064	7.48653	7.3081	7.60844	7.25897	7.24539	7.2365	7.28439	7.20123	7.25662	7.26257	7.39996
Aph1a	7.21411	7.43726	7.24772	7.27348	7.33204	7.23757	7.31255	7.41007	7.36371	7.22288	7.34561	7.54664
Mark3	7.52176	7.511	7.40319	7.16507	7.33631	7.27443	7.27753	7.3413	7.30693	7.18366	7.29093	7.32985
Smarce1	7.1818	7.47296	7.19928	7.65923	7.44614	7.32698	7.24117	7.25107	7.27653	7.3133	7.28036	7.2882
Polr1d	7.05884	7.26929	7.03315	7.96451	7.40158	7.08691	7.08738	7.25318	7.43475	7.64931	7.15674	7.53741
Park7	7.21011	7.56007	7.26167	7.61193	7.37831	7.24508	7.16657	7.24685	7.47645	7.35169	7.31443	7.10242
Yap1	7.37892	7.45021	7.43236	6.91901	7.34763	7.34748	7.3437	7.36173	7.37279	7.27956	7.48601	7.20344
Srsf10	7.14276	7.26983	7.1918	7.45044	7.38976	7.35963	7.15078	7.40516	7.3855	7.54066	7.26257	7.35402
Prpf40a	7.55051	7.36106	7.43764	7.14001	7.47396	7.28236	7.3661	7.32257	7.16174	7.36866	7.19523	7.23575
Eif4a2	7.1283	7.08409	7.13406	7.77319	7.15595	7.47004	7.39613	7.32458	7.55405	7.52006	7.20271	7.15212
Hspg2	7.65761	7.02887	7.74755	6.72972	7.73257	7.61305	6.8192	7.35312	7.02014	7.03915	7.06271	8.09098
Atp5l	6.87402	7.00631	6.9539	8.20816	7.20138	7.22148	7.29245	7.27323	7.60657	7.78591	7.13147	7.33326
Lzts2	7.44896	7.50504	7.38182	6.83844	7.31099	7.39044	7.38731	7.5064	7.47049	7.09791	7.32133	7.22522
Eif4a3	7.15292	7.39421	7.15086	7.5277	7.37923	7.24321	7.11307	7.36873	7.37704	7.41402	7.39708	7.35822
Srrm1	7.44896	7.36461	7.32147	6.8918	7.47869	7.38251	7.45599	7.33852	7.3019	7.29046	7.31832	7.2678
Gls	7.36922	7.29823	7.49374	7.16929	7.32537	7.36194	7.25185	7.41007	7.17523	7.49427	7.30621	7.19407
Gosr2	7.53003	7.3722	7.43729	7.14752	7.3448	7.28601	7.35796	7.26073	7.27141	7.18226	7.42534	7.22935
Glg1	7.66931	7.4105	7.69801	6.70375	7.40655	7.29628	7.57281	7.5159	7.03029	7.05099	7.26793	7.20391
Ubqln1	7.46295	7.44686	7.37707	7.11342	7.44043	7.28084	7.31565	7.26866	7.23089	7.10928	7.3753	7.39751
Ccnb1	7.36409	7.57417	7.13146	7.54486	7.31532	7.391	7.2096	6.99245	7.25245	7.24546	7.22723	7.5569
Raf1	7.34858	7.39471	7.31499	7.37659	7.22817	7.27627	7.23463	7.18601	7.25476	7.32946	7.38438	7.46721
Tmem189	7.00906	7.10487	7.09276	7.23371	7.30422	7.27932	7.39236	7.29301	7.33122	7.44166	7.4764	7.83125
Csnk1g2	7.31172	7.52649	7.31881	7.33161	7.40565	7.29478	7.20865	7.36446	7.36532	7.03345	7.24863	7.34601
Pes1	7.42007	7.36157	7.2401	7.40461	7.44439	7.25596	7.22712	7.35508	7.21138	7.26062	7.33756	7.23667
Shc1	7.56401	7.33698	7.75602	7.49863	7.29694	7.46442	7.13982	7.69039	6.97809	7.01307	7.03991	6.97368
Col4a2	7.67014	7.3732	7.53435	6.7204	7.51219	7.53861	7.08218	7.4381	7.24025	6.93686	6.9494	7.74729
Chtf8	7.14576	7.39768	7.15172	7.33161	7.30083	7.32492	7.30275	7.62752	7.48188	7.23782	7.33544	7.09991
Rbbp7	7.281	7.4739	7.147	7.25323	7.26695	7.2429	7.25647	7.29014	7.456	7.33999	7.38972	7.33156
Etnk1	7.26181	7.08101	7.62591	7.10352	7.3105	7.36768	7.59303	7.13807	7.28221	7.29912	7.63934	7.01469
Ptpn11	7.40165	7.32192	7.51585	6.83977	7.36351	7.3553	7.43087	7.27364	7.17889	7.24501	7.43212	7.3217
Ldb1	7.30263	7.16664	7.34636	7.33819	7.35419	7.417	7.18413	7.57161	7.32629	7.15723	7.21756	7.29259
Mapkapk2	7.49383	7.49303	7.35791	6.82379	7.22613	7.2097	7.17098	7.36524	7.3855	7.33873	7.44637	7.34854
Brca1	6.28888	7.40263	6.45039	7.73204	6.66008	7.42446	7.96305	6.71549	8.33873	7.72935	8.05019	6.89551
Ak2	7.11614	7.20677	7.07572	7.20623	7.36026	7.21767	7.2748	7.1467	7.47744	7.54431	7.59631	7.4242
Smpd1	6.90263	7.23809	6.95488	7.23824	7.08727	7.25751	7.70033	6.82709	7.88398	7.39798	7.79318	7.35149
Kif21b	7.68586	7.55209	7.59635	6.71391	7.55311	7.39072	7.54438	7.32578	7.21257	7.17945	7.2134	6.65728
Usp7	7.48298	7.35086	7.36346	6.8595	7.38061	7.32875	7.28794	7.34683	7.34593	7.22334	7.22585	7.36199
Klhdc10	7.55367	7.36715	7.55391	6.95308	7.31532	7.32845	7.32095	7.33971	7.21732	7.12933	7.32989	7.14047
Cox7a2	6.94999	7.21579	7.07437	7.80712	7.21329	7.04629	7.02594	7.24432	7.53848	7.74877	7.27238	7.40889
Pdk1	7.67139	7.52694	7.58593	7.4741	7.31002	7.36654	7.34457	7.46268	7.09687	7.23557	7.01409	6.44784
Epb41l2	7.13495	7.17937	7.1801	7.40058	7.30374	7.50747	7.4235	7.23071	7.05372	7.30343	7.34561	7.46993
Dusp11	7.506	7.27415	7.42566	7.03403	7.39113	7.24602	7.31033	7.25402	7.15124	7.32861	7.22171	7.36616
Atp6v0d1	7.10388	7.49257	7.1645	7.51945	7.21484	7.31781	7.20817	7.12433	7.56713	7.25128	7.40318	7.12625
Aamp	7.22264	7.40411	7.29227	7.20315	7.19982	7.27137	7.26291	7.62134	7.46001	7.17145	7.30794	7.04627
Tspan3	7.25794	7.22028	7.33999	7.39833	7.20398	7.21926	7.06122	7.17184	7.22854	7.37972	7.26436	7.71425
Ykt6	7.29132	7.33595	7.28682	7.33209	7.31339	7.18648	7.15573	7.18248	7.35026	7.31714	7.27238	7.43298
Acin1	7.23619	7.1994	7.33246	6.90198	7.48511	7.47297	7.2798	7.38879	7.39181	7.10336	7.32261	7.33965
Ilf3	7.35325	7.40706	7.28487	7.05757	7.33299	7.41728	7.38436	7.31413	7.32739	7.25973	7.20318	7.10342
Nav1	7.46151	6.83545	7.81854	6.72542	7.55555	7.44281	7.50611	7.62915	6.74968	7.31629	7.09121	7.28687
Dusp6	7.78483	7.66134	7.70035	7.16084	7.23123	7.40084	7.29514	6.96086	7.17828	7.11272	7.32133	6.60452
Alg10b	7.6513	7.37773	7.58815	6.9683	7.38976	7.35415	7.13481	7.41497	6.96897	7.00303	6.91108	7.64753
Rbck1	7.20035	7.36967	7.24211	7.33585	7.35185	7.28327	7.28161	7.26991	7.36906	7.17003	7.40602	7.10642
Ahcyl1	7.4475	7.30565	7.38072	7.01948	7.29937	7.24102	7.37207	7.4979	7.24083	7.15818	7.28477	7.13754
Nedd4l	6.78233	7.18512	7.06258	7.09633	7.29694	7.36395	7.54589	7.26783	7.73133	7.39192	7.5126	7.14631
Cox5a	7.11797	7.1994	7.16915	7.46425	7.24592	7.15693	7.20435	7.20441	7.38708	7.53701	7.30142	7.38974
P4ha1	7.55503	7.3636	7.41749	7.32453	7.24844	7.08552	7.36866	7.3409	7.22677	7.18553	7.25674	6.99163
Supt6	7.50553	7.20167	7.47026	6.76223	7.30664	7.43626	7.49755	7.28562	7.28278	7.01727	7.40804	7.18654
Rars	7.32235	7.35035	7.17758	7.14752	7.24542	7.20681	7.35451	7.30928	7.39444	7.29826	7.32776	7.22245
Mtmr3	7.6805	7.4198	7.5853	6.96163	7.15273	7.39128	7.40573	7.22728	7.11161	7.20179	7.30273	6.91217
Gart	7.10141	7.43918	7.11488	6.96588	7.37739	7.15527	7.26887	7.32137	7.25937	7.47108	7.42414	7.43855
Arhgef11	7.43874	7.20337	7.63237	6.85623	7.32585	7.45824	7.6482	7.34761	7.12178	7.18926	7.33288	6.78256
Rab10	7.27937	7.45831	7.35382	6.86211	7.32107	7.24258	7.31122	7.32057	7.27141	7.23105	7.46244	7.1632
Selenoh	6.73937	7.46258	6.88658	8.05457	7.22919	7.2097	6.99643	6.91533	7.50489	7.53444	7.1649	7.56165
Sel1l	7.61373	7.13311	7.5853	6.78717	7.25246	7.30589	7.36139	7.34209	7.05305	7.10385	7.23774	7.48384
Trpc4ap	7.32552	7.38924	7.19845	7.15659	7.28718	7.24102	7.21862	7.48184	7.27597	7.18273	7.34435	7.14631
Tacc1	7.38197	7.0847	7.38728	6.80084	7.69466	7.29146	7.13982	7.30564	7.13062	7.2315	7.07142	7.7234
Tspan4	6.89979	7.21072	6.75531	7.68342	7.22306	7.12098	7.12525	7.2422	7.2084	7.65371	7.45893	7.66153
Zfr	7.27445	7.15085	7.16577	7.348	7.37693	7.12642	7.26704	7.29668	7.10394	7.40201	7.26748	7.46332
Dstn	6.93691	7.17706	6.85644	7.70757	7.28718	6.96298	7.19908	7.14398	7.408	7.60145	7.31314	7.64341
Tm7sf3	7.3779	7.51512	7.26958	7.12433	7.22101	7.23349	7.11917	7.32177	7.58928	7.06172	7.14124	7.25795
Slc39a1	7.15173	7.28918	7.2001	7.45607	7.29158	7.15693	7.13129	7.32658	7.09494	7.29046	7.29093	7.54516
U2af1	7.19284	7.52377	6.91308	7.41443	7.37601	7.23694	7.09307	7.10488	7.4028	7.27956	7.24501	7.43577
Cst3	6.87547	6.98008	6.82727	7.50449	7.13759	7.01808	7.33979	7.41722	7.29125	7.78591	7.60198	7.40687
Erbin	7.61287	7.5552	7.44917	6.81708	7.16078	7.30739	7.38013	7.43142	7.21019	7.11371	7.12065	7.02318
Noc2l	7.21183	7.45117	7.08292	7.06325	7.38519	7.20681	7.11001	7.07473	7.23558	7.2948	7.40804	7.6513
Rpl7l1	7.09461	7.27199	7.03083	7.71373	7.26893	7.12302	7.15177	7.096	7.26569	7.46802	7.26391	7.4262
Psmc2	7.02736	7.09696	7.13406	7.43474	7.35606	7.1744	7.11358	7.29342	7.30637	7.47453	7.35488	7.40606
Uck2	7.16773	7.31249	7.29847	7.218	7.48767	7.17473	7.09514	7.23327	7.05438	7.26681	7.32562	7.53333
Eif3i	6.98586	7.24911	6.93014	7.89036	7.24592	7.00965	7.19428	7.16291	7.25129	7.66044	7.15914	7.41051
Brk1	7.12467	7.19542	7.04748	7.6812	7.30712	7.18094	7.18607	7.20397	7.31913	7.43342	7.22952	7.22245
Sgta	7.18994	7.37169	7.10563	7.36605	7.40203	7.10663	7.14829	7.24854	7.2935	7.21924	7.23135	7.43179
Ccng1	7.59326	7.05172	7.96696	7.34707	7.25497	7.17931	7.0754	7.6259	6.62478	6.91505	6.9742	7.49608
Topbp1	7.26347	7.49071	7.27351	7.17508	7.34386	7.31007	7.14282	7.15528	7.07937	7.22425	7.26346	7.37531
Cse1l	7.15411	7.37723	7.0941	7.23018	7.44527	7.18713	7.17147	7.07283	7.07415	7.48785	7.41329	7.38728
Slc12a7	7.04607	7.34111	7.04794	6.67806	7.13542	7.36079	7.52077	6.99044	7.44086	7.23196	7.74723	7.5459
Smarcd1	7.42697	7.48186	7.27705	6.95185	7.26794	7.35328	7.19379	7.37648	7.3019	7.04586	7.12361	7.27937
Srrt	7.09089	7.29558	7.15129	7.10407	7.49405	7.40588	7.09565	7.29954	7.31082	7.21054	7.27105	7.3371
Ppp6r1	7.31811	7.37119	7.33736	7.02706	7.30712	7.23223	7.40114	7.21438	7.19883	7.14239	7.40885	7.09841
Hnrnpul2	7.53689	7.27846	7.46614	6.66466	7.35044	7.36338	7.2748	7.44364	7.27597	7.03085	7.25674	7.10891
Hadhb	7.19226	7.27469	7.15513	7.39473	7.17037	7.11382	7.13932	7.29301	7.23558	7.435	7.20365	7.38275
Cdk1	7.14755	7.4483	7.09854	7.59202	7.31436	7.19814	7.00688	6.96601	7.30637	7.30558	7.18204	7.41818
Bak1	7.05757	7.24582	7.05482	7.25621	7.39022	7.18746	7.26887	7.27406	7.16236	7.35543	7.32776	7.38563
Anxa1	6.66284	7.01538	6.75981	7.62159	7.21432	7.13655	6.94528	7.77516	7.05305	7.74972	7.37116	7.65233
Zc3h7b	7.39813	7.19028	7.48188	6.79675	7.34339	7.30798	7.54627	7.30401	6.99961	7.1366	7.41732	7.03109
Lamtor1	7.14576	7.28491	7.14313	7.84819	7.13269	7.21576	7.19428	7.11834	7.31636	7.39959	7.17111	6.98241
Yy1	7.38654	7.38574	7.43799	7.04671	7.28325	7.22338	7.29065	7.25023	7.1394	7.19159	7.27549	7.03582
Mbnl1	7.24236	7.16606	7.21451	7.28471	7.15756	7.36424	7.30454	7.10208	7.07153	7.39233	7.27682	7.36866
Nudt16l1	7.06391	7.32817	7.04287	7.54851	7.22152	7.18486	7.30007	6.89768	7.63391	7.38339	7.20458	7.13411
Supt5	7.41213	7.2331	7.27901	6.90008	7.33725	7.37882	7.30677	7.27654	7.19402	7.14479	7.40521	7.05612
Tmem106b	7.25905	7.2535	7.39345	7.31837	7.18727	7.23128	7.38647	7.13989	7.10137	7.22516	7.14756	7.26914
Emc10	7.2585	7.41099	7.22269	7.41176	7.27685	7.18225	6.92395	7.15977	7.21257	7.15866	7.18251	7.50141
Dhcr24	7.36203	7.2535	7.52116	6.79402	7.44351	7.18127	7.2537	6.68961	7.19763	6.89062	7.55451	7.74472
Copb1	7.4475	7.34882	7.343	7.15233	7.20086	7.10525	7.30632	7.21351	7.15866	7.21054	7.31616	7.07411
Sbno1	7.50647	7.16373	7.48765	7.04038	7.29694	7.3023	7.38013	7.17184	7.08458	7.10731	7.21525	7.11786
Epn1	7.30692	7.44303	7.26167	6.95858	7.26396	7.31276	7.16214	7.28398	7.32739	7.01359	7.20876	7.32385
Ranbp3	6.91672	7.303	6.99502	7.37704	7.2353	7.29508	7.26658	7.09083	7.4322	7.24097	7.42933	7.27937
Tmem259	7.29078	7.4739	7.33209	7.11287	7.11624	7.23443	7.08166	7.31655	7.2873	6.97951	7.23865	7.39302
Tfdp1	6.90263	7.26766	6.96709	7.47538	7.30712	7.18908	7.02107	7.13533	7.2096	7.37112	7.28873	7.70933
Pigt	7.38197	7.41001	7.24652	6.82847	7.29986	7.15892	7.23135	7.23583	7.38022	7.03967	7.16442	7.44527
Ddr2	7.56222	7.15027	7.56231	6.93707	6.91025	7.32816	7.70979	6.92646	7.1394	7.29003	7.48678	6.81408
Ndufv2	6.98318	7.1426	6.95291	7.86586	7.06286	7.09317	7.16017	7.08895	7.40124	7.66179	7.12705	7.27093
Dek	7.22774	7.37974	7.00073	7.31837	7.36676	7.17375	7.10285	7.1754	7.1281	7.28131	7.20085	7.45315
Agpat3	7.2524	7.3214	7.37267	7.14645	7.27586	7.30499	7.20769	7.20918	7.15928	6.97574	7.15384	7.42219
Arhgap30	7.42204	7.18627	7.38583	6.77267	7.32251	7.34048	7.58534	7.36912	7.15495	7.25038	7.30055	6.6923
Upf1	7.2596	7.33025	7.31499	6.73257	7.45838	7.31305	7.18849	7.2624	7.3562	7.08043	7.34857	7.13166
Ankrd28	7.50086	7.24086	7.51685	7.07567	7.32966	7.26523	7.45035	7.39642	6.91883	7.21329	7.04876	6.80673
Atp5g1	7.10141	7.03907	7.0981	7.46597	7.31243	7.11826	6.88451	7.17495	7.33068	7.4833	7.25449	7.4957
Tmx1	7.239	7.29292	7.14915	7.42108	7.20605	7.13284	7.12322	7.13076	7.14626	7.30343	7.10875	7.48153
Ccni	7.42648	7.3962	7.38619	7.40013	7.15863	7.1254	7.10746	7.26949	7.22618	7.10187	7.12065	7.00936
Rabl6	7.384	7.36715	7.25172	7.30548	7.3018	7.22655	7.10593	7.05412	7.07349	7.1771	7.2069	7.26959
Tmed7	7.27991	7.24802	7.26167	7.33819	7.13759	7.15427	7.08945	7.13533	7.21851	7.2315	7.18723	7.43537
Kat2a	7.1283	7.28972	7.16831	7.03055	7.37185	7.19878	7.14978	7.31816	7.09171	7.16388	7.40926	7.3967
Nmt1	7.23056	7.27361	7.13363	7.20982	7.2297	7.14928	7.22618	7.20614	7.2303	7.24322	7.32605	7.23575
Psma1	6.90828	7.19769	6.94947	7.65095	7.25947	6.97432	7.01944	7.08517	7.37279	7.56851	7.34646	7.36073
Ctsl	7.10941	7.20054	6.92914	7.18502	6.94793	6.96866	7.18897	7.54643	7.32133	7.2743	7.13049	7.87587
1110004F10Rik	7.04543	7.17128	7.01915	7.66933	7.25897	7.05664	7.14481	7.33097	7.03366	7.67482	7.11521	7.15406
Ndufb8	6.63242	6.78104	6.57688	8.26425	7.45358	7.13991	7.31698	6.87216	7.26683	7.85391	7.17016	7.33837
Cd151	6.97512	7.10972	7.01821	7.7568	7.21741	7.03875	7.16755	7.28562	7.15866	7.47147	7.1844	7.26825
Rsrp1	7.21468	6.76039	7.3851	7.64641	6.85447	7.62389	7.47791	6.99145	7.528	7.1083	7.11273	6.94827
Klhdc2	7.15649	7.23643	7.12057	7.71734	7.20086	7.0715	7.07436	7.2174	7.08782	7.54467	7.00983	7.20437
Cflar	7.15767	6.87726	7.31461	7.0224	7.2169	7.18908	7.69183	7.24685	7.2771	7.4684	7.34011	6.82444
Sgpl1	7.12709	7.13013	7.23647	6.98816	7.02693	7.25131	7.44914	7.28603	7.25822	7.14815	7.43411	7.27048
Wasf2	7.32023	7.35699	7.37377	6.71968	7.27042	7.34777	7.28252	7.32858	7.1148	7.06832	7.29924	7.12182
Dazap1	7.28209	7.35342	7.23768	7.05414	7.32871	7.3014	7.07593	7.21265	7.28278	7.12252	7.12065	7.23118
Cic	7.37841	7.20394	7.50316	6.66167	7.30567	7.35848	7.31565	7.29178	7.15495	7.06579	7.22815	7.11786
Tmem131	7.54008	7.25131	7.50952	6.75241	7.33061	7.24102	7.32051	7.14307	6.80593	6.92236	7.2441	7.51689
Foxm1	7.19458	7.32765	7.18638	6.89626	7.32251	7.28236	7.18267	7.03467	7.19523	7.18926	7.30229	7.46098
Impdh2	7.06201	7.36664	7.03547	7.24325	7.32394	7.22117	7.06807	7.2782	7.14813	7.25306	7.22631	7.31134
Fxr1	7.33971	7.44015	7.26127	7.15552	7.27784	7.21321	7.11001	7.23284	7.2096	7.09443	7.13588	7.06077
Pacsin2	7.63562	7.40115	7.48256	6.86732	7.1495	7.1829	7.25462	7.28192	7.16174	7.08745	7.08363	6.92977
Hnrnpdl	7.18413	7.37371	7.11532	7.14484	7.20346	7.41617	7.14829	6.97368	7.38339	7.30859	7.04148	7.22061
Hp1bp3	7.29564	7.2546	7.27037	7.10683	7.07993	7.31543	7.34674	7.33097	7.19643	7.21329	7.19241	6.90242
Lmtk2	7.6107	7.39371	7.71433	6.76083	7.26247	7.3694	6.97529	7.18425	7.10458	6.85347	6.99536	7.26064
Nap1l4	7.10572	7.16722	7.12494	7.3816	7.28178	7.14058	6.96178	7.18027	7.24258	7.35002	7.2975	7.23484
Kmt5a	7.02541	7.35291	7.08874	7.23018	7.24693	7.1652	6.98812	6.9148	7.26683	7.21192	7.30404	7.65506
Copg2	7.5139	7.41345	7.35791	7.10517	7.2353	7.24039	7.22052	7.23412	7.19523	7.10237	7.13685	6.68496
Pdha1	7.37943	7.23532	7.27666	7.05357	7.25347	7.15327	7.11358	7.2354	7.13376	7.12056	7.13049	7.34347
Nus1	7.29618	7.26766	7.23162	6.98517	7.26396	7.04163	7.07436	7.23156	7.26282	7.22106	7.06065	7.48076
Bop1	6.90616	7.1707	6.94355	7.15019	7.42759	7.05094	7.05805	7.24728	7.13815	7.38665	7.38931	7.5459
Srpk1	6.96837	7.18913	6.99216	7.26018	7.35979	7.28631	7.22335	6.94168	7.24897	7.24097	7.25808	7.4286
Atp5e	6.5882	6.75962	6.8422	8.14095	7.27339	7.18811	7.30721	6.97776	7.55686	7.8694	7.13196	6.7516
Prpf19	7.20495	7.40756	7.17884	7.19644	7.32871	7.19685	7.04209	7.01496	7.09365	7.09294	7.2746	7.34389
Sec62	7.28318	7.34162	7.20134	7.1619	7.2429	7.1816	7.25785	7.10768	7.21435	7.06172	7.04513	7.26736
Rcor1	7.58048	7.41883	7.53927	6.60357	7.3415	7.23883	7.26749	7.25989	7.15124	6.93408	7.1773	6.84792
Fads1	7.48393	7.41638	7.56809	7.11888	7.24037	7.30469	7.00907	6.87817	7.11671	6.67665	7.06477	7.47806
Atp6v1c1	6.95819	7.26332	7.02149	7.4171	7.08783	7.11792	7.15375	7.13442	7.49025	7.34041	7.17397	7.19454
Ubap2	7.16123	7.08347	7.30541	6.73542	7.39022	7.31454	7.23088	7.26449	7.1531	7.19392	7.34477	7.15309
Cd109	7.08403	6.9061	7.11926	6.82245	7.37785	7.00413	7.32227	7.56654	6.87893	7.43696	7.34519	7.44803
Cdk5rap2	7.37739	7.14437	7.42848	6.78579	7.3975	7.4679	7.41195	6.98082	7.12241	6.99984	7.22906	6.96158
Sdhc	7.02411	7.1834	7.15727	7.63501	7.14788	7.10972	7.01181	7.10721	7.28391	7.34919	7.16298	7.1233
Zdhhc5	7.21411	7.23088	7.23768	6.87639	7.36026	7.15759	7.36353	6.98183	7.01878	7.05713	7.25808	7.50898
Srsf11	7.13435	7.06737	7.11751	7.40058	7.24087	7.29448	7.16116	7.21697	7.07021	7.2935	7.05239	7.18984
Kif1c	7.18588	7.18225	7.18346	6.94879	7.20709	7.29508	7.15425	7.06182	7.17645	6.96108	7.38562	7.48691
Fam91a1	7.43238	7.18627	7.37597	6.95063	7.19774	7.1128	7.23884	7.21869	6.98854	7.07136	7.16968	7.27404
Rab2a	7.30585	7.43485	7.29266	7.00951	7.05021	7.19329	7.08478	7.26366	7.2873	7.10138	7.07398	7.10692
Cyfip1	7.19284	7.29292	7.19471	6.81371	7.1799	7.13856	7.22853	7.30645	7.14065	7.12787	7.45306	7.11736
Tmem245	7.4538	7.1426	7.45577	6.71174	7.14626	7.36395	7.39487	6.95415	7.09945	7.07136	7.10076	7.2736
Klc1	7.06518	7.18052	7.10651	7.12813	7.27042	7.21353	7.1744	7.28274	7.25937	7.17898	7.14804	7.15502
Ruvbl1	6.97781	7.38475	7.03315	7.133	7.39523	7.07572	6.97136	7.30645	7.27767	7.19531	7.19288	7.20484
Fem1b	7.32076	7.35393	7.29537	7.01304	7.04269	7.17571	7.3759	6.96549	7.25302	7.05815	7.20923	7.08124
Soat1	7.14516	7.10305	7.17506	7.02415	7.21638	7.23663	7.32711	7.1705	7.21138	7.23241	7.25584	7.04262
Psmb6	6.99983	6.99522	6.87626	7.69261	7.26047	6.96108	7.01672	7.1705	7.1444	7.51487	7.26837	7.2394
Nceh1	6.67367	6.89842	6.73946	7.08241	7.12942	6.89419	7.66324	7.16604	7.34105	7.62678	7.51335	7.39629
Eif3m	7.09461	7.1811	7.01351	7.37796	7.21432	7.01039	7.16755	7.24177	7.20661	7.38013	7.06989	7.15309
Strn4	7.30156	7.25951	7.25092	7.06325	7.20657	7.20649	7.10644	7.20571	7.03232	7.11076	7.191	7.14485
Cluh	6.98519	7.02118	7.07797	6.79539	7.31291	7.0337	7.17586	7.18513	7.07872	7.44361	7.46788	7.49646
BC005537	7.31439	7.15906	7.22919	6.86472	7.08895	7.17604	7.33979	7.29219	7.18496	7.01727	7.29575	7.08073
Nktr	7.29941	6.81334	7.392	6.97977	7.21432	7.44363	7.42267	7.01098	7.1281	7.26239	7.04825	7.00186
Hprt	6.97647	7.10548	6.83795	7.68157	7.15971	7.0538	7.1095	7.13943	7.14564	7.68113	7.11223	7.00025
Oga	7.49806	7.41099	7.35196	6.78166	7.11679	7.29689	7.20817	7.34958	7.32739	6.92851	6.93879	6.78755
Stag2	7.36973	7.33077	7.30502	7.08129	7.07028	7.236	7.20531	7.25822	6.98646	7.05815	7.05084	7.04157
Tdg	7.34285	7.31617	7.22553	7.18241	7.29402	7.19652	6.91054	7.02485	7.08393	7.01359	6.8723	7.52663
Gsk3b	7.54554	7.32921	7.49745	6.73756	7.16345	7.29899	7.37079	7.15932	6.93838	6.99559	7.13245	6.81347
Mfsd1	7.08715	7.41931	7.05802	7.057	7.14626	7.15294	7.06016	7.23795	7.21969	6.93686	7.03153	7.57325
Ddit4	7.9604	7.27954	7.65186	7.19592	7.04269	7.34398	7.18122	7.67916	7.1369	6.82316	6.67525	6.00589
Josd2	6.99983	6.95472	7.19264	7.75995	7.26744	7.16454	7.12424	7.18248	7.2084	7.16246	7.03573	6.91844
Taf15	7.41511	7.40608	7.27037	6.71246	7.16238	7.56835	7.14232	7.1476	7.44136	6.85229	6.9959	6.85269
Timm23	6.76841	7.06737	6.7508	7.74836	7.22408	6.92257	7.12272	6.99899	7.0643	7.66849	7.11372	7.50596
2020-09-08	7.239	7.11695	7.30425	6.93025	7.068	7.33492	7.25831	7.36951	7.01946	7.09493	7.12558	7.08631
Tmed9	7.33237	7.22643	7.14786	7.00538	7.20502	7.10766	6.99643	7.10675	7.21376	7.04586	7.12361	7.4278
Pi4ka	7.37638	7.2214	7.35828	6.65265	7.25597	7.26707	7.35967	7.08422	7.10778	7.02042	7.38972	6.83954
Stat1	5.62515	5.78824	6.2233	6.64433	7.0531	6.75953	8.67251	7.70676	7.58239	8.6659	8.92238	6.27826
Ddx23	7.15708	7.12535	7.06167	6.98816	7.4227	7.16915	7.03458	7.23199	7.15186	7.02303	7.18535	7.36115
Dip2b	7.37024	7.19256	7.50685	6.6906	7.22715	7.28722	7.16411	7.4206	7.16789	6.91392	7.04044	6.91958
Rusc2	7.39159	7.49489	7.16534	6.74536	6.90196	7.39888	7.515	7.13442	7.37279	6.99399	7.18818	6.58315
Nop53	7.29186	7.33129	7.2405	7.30596	7.0968	7.18875	7.09152	7.24262	7.18557	6.94295	7.06477	6.89955
Sorbs1	7.34702	7.17822	7.56134	7.08688	7.30277	7.39016	7.43414	7.11464	6.5627	6.91562	7.06938	6.91217
Mtch2	6.80297	7.10608	6.85592	7.43912	7.16184	6.99005	7.01835	7.11696	7.30804	7.56744	7.17492	7.32985
Tecr	7.20954	7.3375	7.1594	7.14162	7.16505	7.18908	7.17391	6.96806	7.24955	6.88832	7.1601	7.22199
Pik3r3	7.23282	7.06675	7.4863	7.54811	7.22152	7.48808	7.3363	7.0015	7.09042	6.84225	6.99213	6.54609
Hba-a2	6.96091	6.63405	6.38419	7.85508	10.5854	7.24664	4.84856	6.82426	7.30135	7.64388	5.84835	7.71064
Cox7a2l	7.24962	7.12775	7.25172	7.54608	7.01928	7.12336	7.13782	7.29014	7.27483	7.16388	6.87874	6.76811
Gcn1	7.26015	7.20337	7.38401	6.46875	7.29694	7.26769	7.12272	7.30483	7.11924	6.96217	7.294	7.11736
Cul3	7.29725	7.38624	7.20836	6.85885	7.30906	7.12879	7.06912	7.09834	7.13502	7.02512	7.01569	7.26019
Atp5mpl	6.84926	6.99588	7.12407	7.51448	7.24087	7.16223	7.17196	7.02386	7.52991	7.38949	6.69064	7.09841
Cad	7.12951	7.28491	7.15727	6.4437	7.44702	7.18551	7.02973	7.18689	7.02827	7.0607	7.38849	7.39097
Mapk14	7.00511	7.12715	7.17968	6.84506	7.32966	7.01112	7.0801	7.07664	7.15495	7.22379	7.33246	7.36575
Gmps	7.18063	7.4739	7.01915	6.96406	7.24794	7.01844	7.08375	7.096	7.05968	7.20133	7.18629	7.19642
Scap	7.20265	7.26712	7.13276	6.77752	7.26396	7.15394	7.06807	7.19085	6.93406	6.95834	7.26837	7.50709
Afdn	7.25739	7.11936	7.25092	6.75592	7.16451	7.25193	7.23229	7.08375	7.08588	7.08745	7.19617	7.23347
Safb	7.29671	7.20167	7.28526	6.72183	7.3663	7.33961	7.03242	7.18997	7.30971	6.86926	7.11074	6.99379
2020-09-11	7.17946	7.4271	7.16577	6.9598	7.24592	7.15227	7.09049	6.86282	6.97879	7.02303	7.30838	7.32213
Csnk2b	6.93484	7.15496	6.95928	7.36789	7.19878	6.94234	7.06912	7.06949	7.24491	7.17381	7.23318	7.36616
Dync1li1	7.17654	7.20903	6.98641	7.01069	7.00981	7.251	7.39738	7.18381	7.19523	7.29307	7.11421	6.87865
Hdac2	7.05119	7.35801	7.04056	7.19333	7.20242	7.09351	7.04048	7.09365	7.36585	7.00303	7.01675	7.24531
mt-Nd3	6.87547	5.85615	7.24612	7.43562	7.1201	7.44851	7.19042	7.1188	7.59977	7.17898	6.83306	7.7967
Chpf	7.18238	7.39917	7.11838	6.67435	7.29158	7.10077	7.01181	7.19349	7.2303	6.98005	7.20131	7.3161
Prpsap1	6.93137	6.97412	7.00216	7.04268	7.1762	7.05094	7.07017	7.3105	7.0748	7.23602	7.29268	7.49913
Dlat	7.16773	7.13786	7.19097	6.78166	7.25397	7.07888	7.11256	7.19041	7.15062	7.19624	7.2286	7.15502
Tmem176b	7.10264	7.13668	7.09276	7.15818	7.09344	6.93887	7.19908	7.37029	7.29967	6.9752	7.13685	7.13998
Aph1c	6.53164	7.03653	6.68076	7.53876	6.74172	7.28873	7.42719	6.85341	7.57593	7.41482	7.40399	7.13558
Abl1	7.26402	7.13786	7.3104	6.77959	7.26247	7.1907	7.28388	7.11696	6.88789	7.08444	7.16442	7.14047
Nxf1	7.13133	6.9601	7.05756	7.34194	7.20968	7.24976	7.08842	7.13624	7.22323	7.16388	6.96047	7.0959
Map3k11	7.06834	7.34728	7.27901	6.70811	7.14031	7.19749	7.1008	7.17717	7.18678	6.9752	7.32176	7.11588
Usf2	7.07023	7.30406	7.03269	7.25869	7.18517	7.13924	7.0554	7.06422	7.19823	7.07085	7.04876	7.1632
Mapk6	7.13012	7.16256	7.01961	6.9598	7.14302	7.11826	7.18219	7.08138	6.99685	7.17334	7.235	7.37241
Trim35	7.61546	7.29079	7.38401	6.80966	6.98888	7.19232	7.2172	7.04831	7.04172	6.96978	7.16394	6.84852
Dgcr2	7.23282	7.1573	7.31919	6.71463	7.18043	7.21385	7.12626	7.16425	7.03635	6.96326	7.11173	7.34092
Rasgrp3	7.27171	7.49164	7.21697	6.86732	7.03804	7.45365	7.28839	6.99296	7.15743	6.91054	7.1427	6.72258
Arl1	7.05693	7.12655	6.89376	7.83629	7.05368	6.91356	7.1049	6.92909	7.00168	7.53224	6.99483	7.10792
Necap2	7.1853	7.06986	7.09142	7.5473	7.12942	7.14627	6.96234	7.01347	7.05504	7.08093	7.09625	7.15309
Uhmk1	7.31705	7.18684	7.50685	6.60435	7.12559	7.14292	7.35236	7.19611	7.06824	6.97411	7.19523	6.85804
Ythdf3	7.16596	6.99588	7.27509	7.11396	7.05942	7.25317	7.31255	6.99245	7.12368	7.18787	7.075	6.96103
Zfand5	6.90899	7.16023	6.95831	7.40417	7.10683	7.025	7.25231	6.90947	7.31415	7.14431	7.26346	7.0618
Zc3h11a	7.28318	7.14378	7.17	6.92589	6.96763	7.34864	7.06175	7.28932	7.19763	7.05509	6.96873	7.08833
Ptpn14	7.16714	6.92547	7.44289	6.70303	7.29207	7.24758	7.20578	7.25989	6.75622	7.06121	7.07601	7.35528
Psmc6	6.9758	7.09513	6.8496	7.36513	7.10461	6.96715	7.04369	7.096	7.12431	7.44674	7.12164	7.29478
Rexo2	6.81053	7.18167	6.85171	7.55901	7.14788	7.02609	6.99864	6.85452	7.20303	7.41601	7.14173	7.29347
Rtcb	7.10818	7.22307	6.97678	7.09022	7.19042	7.05878	7.04689	7.20658	7.2191	7.09642	7.18629	7.07971
Eif4ebp1	7.51575	7.57505	7.14614	7.18032	6.7847	7.02972	7.22004	7.223	7.22323	7.14094	6.91279	6.50198
Mbtps1	7.28481	7.44973	7.17548	7.0723	7.10183	7.12064	7.0853	6.96806	7.00305	6.89805	6.96873	7.30613
Atp6v0a2	6.93691	6.84056	7.12276	7.06608	7.18937	7.04916	7.1323	7.13807	6.95908	7.20317	7.33671	7.45903
Lsm14a	7.1882	7.29558	7.22472	7.09189	7.07823	7.16553	7.1146	7.08847	7.0377	7.11125	7.08313	6.94493
Sumo3	6.96634	7.18742	6.81759	7.53671	7.0737	7.09108	6.92046	7.003	7.10586	7.2909	7.01993	7.40768
Ptov1	7.14276	7.21129	7.19471	7.06665	7.20294	7.12811	6.93379	7.19524	7.12873	7.04637	6.99859	7.16991
Anln	7.10018	7.19256	6.9955	7.06778	7.31532	7.0538	7.02594	6.89822	6.99754	7.17475	7.14075	7.44606
Cmas	7.25683	7.25295	7.25889	7.15126	7.05079	7.01808	7.05963	7.13533	7.15866	7.07388	7.12114	6.8675
Kirrel	7.24906	7.32817	7.37194	6.66316	7.13106	7.22465	7.00579	6.89067	6.85779	6.88488	7.33544	7.41374
Marcksl1	7.2739	7.32661	7.34112	7.10793	7.41644	7.18029	6.76642	7.30888	6.95908	6.65994	6.77589	7.2353
Fxr2	7.1882	7.28437	7.21164	6.80898	7.13596	7.11074	7.05115	7.23583	7.27767	6.86868	7.2171	6.95771
Washc5	7.12527	7.28276	7.08964	6.89754	7.21071	7.03551	7.17293	7.05218	7.11861	6.90941	7.19006	7.25795
Srebf1	7.52912	7.35648	7.51851	6.67286	7.25297	7.06622	6.87553	7.05363	7.0003	6.65117	7.06528	7.29259
Tpd52	7.2739	7.30881	7.07391	7.18189	6.97191	6.95116	7.14182	7.13487	7.10586	7.22288	7.20876	6.75479
Scrn1	7.10018	7.23088	7.15043	7.0189	6.96335	7.09351	7.25601	7.1983	7.32354	7.02408	7.1649	6.795
Ubqln4	6.78694	7.20734	6.98208	6.87315	7.37324	7.06939	7.01835	7.1367	7.04773	7.11567	7.2975	7.4024
Snx17	7.15113	7.31407	7.1918	7.12052	7.06057	7.07115	6.94242	7.18601	7.12241	7.04586	7.02363	7.07717
Asna1	7.05311	7.0711	6.89734	7.7043	7.23123	7.01479	6.90466	6.92593	7.10906	7.30343	7.10825	6.97914
Acadl	7.12649	7.1707	7.0243	7.23572	6.91724	7.09594	7.25092	7.30401	7.09558	7.23692	7.15481	6.6883
Abcf2	7.12345	7.16838	7.0712	7.05927	7.21019	7.02246	6.947	7.03809	7.04773	7.09741	7.18629	7.29697
Dock7	7.34232	7.00891	7.38401	6.72399	7.32966	7.10937	7.18073	7.11372	6.86765	6.98167	7.11322	7.09035
Dnajb11	7.08653	7.13608	6.97678	7.01656	7.17779	7.00081	6.84826	6.74092	7.20003	7.19066	7.1349	7.73507
Psmd11	7.03255	7.19428	6.99454	7.12705	7.15381	6.95613	7.05805	7.01148	7.05902	7.14911	7.28345	7.21876
Nop2	6.9279	7.19085	6.91963	7.01245	7.38107	6.91435	6.99532	7.13989	7.06759	7.19066	7.25898	7.23803
Vasp	7.28698	7.49905	7.33473	6.67732	7.06572	7.04271	7.03296	7.23497	7.28786	7.03397	7.19006	6.54314
Fbxw8	7.19052	7.27793	7.2141	6.77614	7.25297	7.06445	7.07174	7.07473	7.07415	6.98489	7.15529	7.08276
Fam162a	7.13676	7.01279	7.22797	7.65585	7.11237	7.06798	7.06386	7.05073	7.08458	7.38258	6.87172	6.51332
Adcy7	6.61005	7.11936	6.93264	6.79539	7.17567	7.05059	7.2748	7.1983	7.1419	7.38095	7.26078	7.22797
C2	6.67699	7.03015	6.83901	6.69353	6.64716	7.04343	7.8609	7.18381	7.5107	7.51561	7.8853	6.25502
Nfatc2	7.09771	7.06612	7.05436	7.01245	7.22254	7.21129	7.26841	6.92064	7.00168	7.00621	7.08211	7.17468
Tsen34	7.048	7.43629	6.96563	7.23723	7.0577	6.98669	6.79845	7.05025	7.21079	7.03397	7.18912	7.09841
Fbln1	6.99186	7.29345	6.92514	7.03518	7.07426	6.99116	7.16165	6.83723	7.18435	6.89748	7.34096	7.37489
Exoc4	7.50833	7.25405	7.58213	6.85689	7.19721	7.22939	7.22288	7.01148	6.82239	6.68857	7.02627	6.66476
Usp1	7.13796	7.44351	6.97243	7.10683	7.04906	7.01771	7.0335	6.83386	7.01265	7.11959	7.04928	7.27493
Slc16a1	7.02736	7.14437	6.94503	6.71679	7.28276	6.82781	6.99034	6.97725	6.93981	7.20824	7.2171	7.76479
Pitrm1	7.14156	7.33077	7.11488	7.02124	7.13868	7.1325	6.97809	6.99497	7.00511	6.81594	7.11521	7.23347
Twf1	6.99119	7.04288	6.99024	7.10352	7.11569	7.03875	6.92221	7.12295	7.03299	7.19855	7.12312	7.32428
Scrib	7.05119	7.33543	7.0874	6.72614	7.22203	7.16882	6.95895	7.03663	7.04573	6.93241	7.21525	7.22199
Rrp7a	6.86096	7.11936	6.80568	7.36237	7.17461	6.99154	6.89106	6.99195	7.12747	7.1395	7.2134	7.32127
Rapgef3	7.12951	6.92478	7.17042	7.07399	7.04906	7.21193	7.18364	7.37764	7.00854	6.95012	7.04044	6.87455
Pdxk	6.85219	6.88576	6.94306	6.63062	7.3158	6.96184	7.31609	7.15977	7.02894	7.29999	7.29968	7.30003
Sec63	7.29456	7.10851	7.19845	6.80152	7.02282	7.11348	7.11968	6.99044	7.01401	6.9111	7.00663	7.39261
Yme1l1	7.1137	7.06113	6.95977	7.45909	7.15273	6.92686	7.10797	6.9869	6.8402	7.38054	6.94327	7.02951
Cacybp	6.69672	7.14555	6.73432	7.24075	7.08501	6.7534	6.94184	6.88416	7.16912	7.50217	7.23637	7.57217
Cited2	7.55773	7.16896	7.25292	6.65491	6.90068	7.13655	7.25046	7.48793	6.85551	7.13998	6.94215	6.59245
Mapk3	7.18238	7.2281	7.18889	7.29875	7.05425	7.03226	7.06859	7.25528	7.07218	6.82136	6.95384	6.77629
Cdkn1b	7.57071	7.29025	7.25092	7.45434	6.87157	7.03587	7.16214	7.20266	6.80987	7.10336	6.91165	6.26847
Ndufa10	7.04158	7.00826	6.99597	7.06495	7.23174	7.12472	7.08686	6.97113	7.04105	7.08444	7.10825	7.16943
Rtn3	6.91251	7.22643	7.04195	6.97314	6.96089	6.95613	6.89758	7.02534	7.28674	6.92572	7.12558	7.59156
Gorasp2	7.28807	7.14614	7.0865	7.0148	7.04906	7.00376	7.02649	7.05508	6.92392	7.06426	7.06835	7.19313
Pclaf	6.79612	7.28972	6.80513	7.36375	7.20034	7.11758	6.77417	6.6639	7.14875	7.26946	7.10875	7.38027
Uqcrh	6.58556	6.85217	6.79092	7.74589	7.11734	7.01771	7.12474	6.91107	7.38708	7.62884	6.78027	6.96764
Bmi1	7.09089	7.15964	7.09142	7.1845	7.08839	7.07362	7.03135	6.8966	6.99201	7.10977	7.10126	7.08225
2020-03-06	7.50507	7.05235	7.47094	6.60201	6.96886	7.16685	7.08842	7.21005	6.96897	6.86809	6.94717	7.04783
Numa1	7.19168	7.12954	7.27194	6.51262	7.16824	7.28994	7.13079	7.38572	7.10266	6.76496	7.0704	6.87044
Adrm1	6.8841	7.21298	6.89887	7.06155	7.11127	7.03153	6.98311	7.10768	7.0689	7.10237	7.25314	7.14485
Psma4	6.73381	7.03716	6.76653	7.31361	7.06686	6.85178	7.02649	7.00799	7.17218	7.4707	7.17825	7.22659
Cpsf6	7.22548	7.08286	7.20712	6.98577	7.11293	7.19685	7.03242	6.98892	6.9434	7.07892	6.95384	7.03319
Nsa2	7.10695	7.09023	6.84855	7.68637	7.03279	6.92296	7.13129	6.95622	6.88043	7.2699	6.88341	7.01788
Saraf	7.24124	7.24472	7.0712	6.90388	6.95103	6.99599	7.10644	7.05025	7.13376	7.00144	7.05239	7.06643
Hmox1	7.35842	7.74431	6.7165	6.84109	6.62484	6.84726	7.32447	7.03565	8.15665	6.6505	6.7429	6.76685
Gtf3c1	7.13133	7.02503	7.27548	6.53733	7.23377	7.1456	7.0801	7.24896	7.04306	6.94682	7.12213	7.01682
Sh3pxd2b	6.80145	6.71341	6.89428	6.60357	7.22101	7.16355	7.39655	7.14398	6.98993	7.27562	7.37365	7.22568
Ncln	6.93968	7.19713	6.92665	6.95614	7.13651	7.04091	6.97192	6.76767	7.00374	7.00885	7.31314	7.53147
Tars	7.51158	7.47108	7.15129	6.80016	7.02282	7.15094	7.12726	6.86777	7.10458	6.79343	7.02258	6.76558
Ilf2	6.80221	7.17533	6.92665	7.47836	7.10461	7.01844	6.7921	7.007	7.12684	7.22516	6.96268	7.16464
Phc2	7.18994	7.27739	7.01445	6.98157	6.99249	6.91042	6.98923	7.1983	7.09558	7.05917	7.08667	6.98404
Ptpra	7.19342	7.22475	7.18471	7.08576	7.11789	7.00376	7.00524	7.05605	6.9434	6.86693	6.96763	7.10792
Snw1	7.11309	7.24747	6.93512	7.1357	6.99669	7.01369	7.08634	7.08989	7.06561	7.12836	7.05343	6.87748
Psma6	6.74016	6.90261	6.64047	7.66746	7.01041	6.91003	7.04956	7.0454	7.08523	7.65438	7.05291	6.9775
Pmpca	7.14336	7.11695	7.03733	6.97435	7.11569	6.98295	6.97473	6.95467	7.03029	7.07338	7.02258	7.30917
Bag1	6.9272	6.94119	6.97485	7.31122	7.17673	6.93539	6.92569	7.04102	7.0689	7.09294	7.01516	7.32342
Eefsec	7.05566	7.36258	6.93562	7.15924	6.94048	7.08865	7.10848	6.97776	7.17462	6.93742	7.14659	6.83472
Arih1	7.10264	7.06799	7.16915	6.92276	7.10739	6.92413	7.11052	7.03173	6.95197	7.16056	7.24455	6.90874
Dstyk	7.25628	6.97279	7.28448	6.76223	6.86633	7.24664	7.26199	6.82199	7.0058	6.90601	7.14804	7.15647
Ndufab1	6.93622	6.95337	6.92264	7.26166	7.04906	6.9997	7.05115	6.85397	7.16605	7.3425	6.97202	7.17277
Bfsp2	6.70405	7.31617	6.67244	7.27004	7.05483	7.02136	6.80477	7.0025	7.39653	7.16151	7.03678	7.23986
Ncstn	7.1911	6.93301	7.15172	6.85754	7.11403	7.00229	7.05805	7.23838	6.90123	7.03241	7.05291	7.14776
Plin2	6.71377	6.89912	6.65383	7.15606	6.96151	6.87939	7.17098	7.226	7.2536	7.26416	7.36534	7.13117
Syngr2	6.83449	7.04604	6.88091	7.00538	7.05425	6.94388	6.88272	7.30239	7.05968	7.10088	7.20644	7.35654
Sem1	7.06518	7.0773	7.1012	7.3117	7.10183	7.10353	6.71231	7.15257	7.34322	6.96544	6.90134	6.82444
Fh1	6.8646	7.14791	6.93363	7.40148	7.03687	6.8386	6.88212	6.92064	7.04773	7.3546	7.09222	7.139
Smc3	7.18297	7.279	7.05756	6.69573	7.0788	7.09247	7.06333	6.94272	7.21317	6.87969	7.06682	7.10692
Rere	7.22378	6.90331	7.27194	6.55841	7.11403	7.38223	7.24024	7.15708	7.04973	6.94406	7.08566	6.72063
Adam10	7.06391	6.83545	7.14786	6.79607	7.03804	6.97281	7.13381	7.0847	6.83558	7.13901	7.20597	7.39751
Sar1a	7.06011	7.02567	7.05436	7.13084	7.02693	6.9049	6.93897	6.91852	7.11734	7.11322	7.10875	7.23484
Ifitm2	7.0084	7.0847	7.00642	7.23169	6.95474	6.96639	6.94299	7.19743	7.07741	7.08344	7.00289	7.07666
Adsl	6.74491	7.15847	6.66945	7.45909	7.03862	6.92257	7.07017	6.95208	7.05703	7.35419	7.1971	7.00079
Ilrun	7.05247	7.13786	7.06349	6.73685	7.11182	7.01735	7.1333	7.15032	7.08328	6.93908	7.18912	7.00883
Ppp1r37	6.89411	7.17475	6.96757	6.9451	6.88069	7.09039	7.1328	7.0065	7.38603	6.93742	7.25853	6.94269
Mrpl13	6.67201	6.91996	6.59336	7.78562	7.05598	6.87011	7.07749	6.76295	7.23733	7.58985	6.95826	7.09035
Pcyox1	7.04415	6.89912	7.25372	7.03403	7.22254	6.93539	6.89817	6.91267	6.74475	6.98059	7.13245	7.55141
Eif3j1	6.82181	7.08039	6.80187	7.42241	7.08389	6.97055	6.94985	6.8738	7.03029	7.22379	7.14562	7.20437
Arf6	7.12588	7.1994	7.1118	6.98397	7.17355	6.95002	6.992	7.0005	6.98715	7.04173	7.23546	6.7981
Stox2	6.92302	7.21354	7.13536	6.75382	7.1201	7.10869	7.30721	6.92117	7.18496	7.04018	7.06322	6.82262
Smyd2	6.76608	7.15964	6.66945	7.20572	7.01278	6.86118	7.10848	6.82086	7.29462	7.24232	7.28036	7.16991
Sec24c	7.06581	6.92822	7.23566	6.71968	7.15649	7.04629	7.07645	7.07283	7.10586	6.94406	7.21387	6.99864
Cdc27	7.18762	7.03525	7.16067	6.98935	7.13759	7.10388	7.18655	6.87216	6.77164	7.03501	7.07296	7.01043
Sbf2	7.47538	7.13905	7.42848	6.6466	7.17037	7.1456	7.24117	7.005	6.69796	6.90997	6.99698	6.70488
Bms1	7.15411	7.01344	7.08829	6.61057	7.30277	6.9837	7.12626	7.14034	6.97669	6.9638	7.13539	7.05767
Psmb5	6.81053	7.01989	6.80731	7.62505	7.03571	6.91827	6.84642	6.95467	7.08198	7.45645	7.08617	6.90012
Washc2	7.03513	7.01408	7.02756	6.65038	7.11844	7.13115	7.14082	7.18733	7.04038	6.89805	7.16681	7.13068
Gas2l3	7.19747	6.92822	7.1801	6.89435	7.20034	7.09351	7.16804	6.94532	6.94698	6.98113	6.78837	7.21553
Gfm1	6.99452	7.18052	7.01351	6.79197	7.17567	6.99636	6.88212	7.04686	7.00786	6.99719	7.06477	7.3844
Psmd13	6.7831	7.08224	6.76542	7.49905	7.09008	6.83653	6.89936	7.04151	7.04306	7.34961	6.98618	7.14193
Lrrc58	7.23619	7.25896	7.21738	6.59025	7.10071	7.17047	7.03188	7.0599	7.05039	6.78421	6.95992	7.05146
Dnm1l	7.1636	7.03398	7.20836	6.78028	7.03103	7.05949	7.1146	6.97573	7.04773	7.05304	7.08363	6.94381
Zeb2	7.30209	7.10183	7.29498	6.54466	7.15488	7.11621	7.28929	7.04928	6.84097	6.80199	7.1157	6.86514
Sppl2b	7.11064	7.06675	7.19638	6.91147	7.25597	7.16156	6.89936	7.11279	6.81301	6.81292	6.80199	7.3057
Prc1	7.15945	7.21747	7.07662	7.05586	7.09568	7.04773	6.98367	6.74631	6.96685	6.86809	6.95439	7.26019
Idi1	6.9445	6.90192	7.23485	7.10131	7.09232	6.74194	6.95725	6.7228	7.18253	7.21878	7.0892	7.24077
Ssu72	6.833	6.98668	6.78762	7.68416	6.96396	6.87254	7.08582	6.81346	7.05504	7.38176	7.00503	6.95272
Pcm1	7.45718	7.03462	7.24211	6.6928	7.15917	7.01479	7.21055	6.98791	6.86915	6.97249	6.95273	6.8214
Fkbp6	6.99452	7.34162	6.82727	7.04441	6.98888	7.04271	7.02973	7.10255	7.24316	6.94682	6.95992	6.86041
Actr1a	6.86388	6.88999	7.01209	6.97616	7.17037	6.95994	6.87313	7.10582	6.92827	7.08244	7.18204	7.32771
Stmn1	6.84852	7.31459	6.70837	7.32264	6.99128	6.97394	6.9309	6.90734	7.23908	7.04894	7.03835	7.04627
Creb3l2	7.36819	7.00501	7.44952	6.58235	7.00207	7.2256	7.08114	6.93854	7.03434	6.81231	6.96433	6.9007
Stub1	6.96227	7.18225	6.89887	7.16243	7.11071	6.93346	6.75733	6.93382	7.21969	7.03708	6.95882	7.18701
Pomp	6.64687	6.87655	6.79147	7.45607	7.03454	6.86524	7.01617	6.98132	7.14502	7.41879	7.1388	6.96489
Ccnd3	6.7073	7.04351	6.96709	6.78304	7.17143	6.77992	6.88749	7.18997	7.11543	7.13515	7.38931	7.16272
Cryab	6.39738	6.31223	6.77434	7.21698	7.24592	6.7782	6.91171	7.2848	7.06364	7.45218	7.3153	7.57506
Bax	6.94793	7.02182	6.99883	7.41354	7.0479	6.98445	6.70557	7.14896	7.05637	7.00673	6.8246	7.16704
Laptm4b	6.96023	7.10244	6.91207	6.86081	6.77355	7.01442	6.98367	7.02189	7.26855	7.08194	7.27504	7.03529
Dnajc13	7.18121	6.88505	7.20753	6.48916	7.07028	7.16816	7.22382	6.91533	6.71568	7.00885	7.21756	7.19642
Slc48a1	6.76608	7.00631	6.81867	7.07624	6.80057	6.9504	7.16214	6.90947	7.22677	7.14719	7.26301	7.14873
Tjp2	7.07275	7.06986	7.00168	6.56643	7.13324	7.04163	6.992	7.12709	6.87443	6.97087	7.17159	7.25254
Utrn	7.24571	6.83105	7.41357	6.32288	7.08445	7.15094	7.22241	6.98639	6.88938	6.98328	7.16058	6.96709
Kpna4	6.94243	7.11394	7.02523	7.10462	7.1581	6.8624	6.85923	6.70815	6.86462	7.20179	7.23819	7.16991
Cggbp1	6.93899	7.06238	7.13925	7.06495	6.95288	7.02827	7.1333	6.84785	7.08847	7.00038	7.08262	6.88565
Lmnb1	6.94656	7.35648	6.84167	6.77614	7.25497	7.17473	6.77095	6.77296	7.12494	6.82856	7.11322	7.26154
Appbp2	7.19516	7.13668	7.17632	6.71318	7.05425	7.00229	7.05275	6.75048	7.02894	7.01937	7.14027	6.94772
Fbl	6.95887	7.13013	6.85013	7.17927	7.15004	6.99933	6.69812	6.99799	7.05835	6.93631	7.06117	7.19407
Pabpc4	7.02411	7.20903	7.03593	6.85295	7.18043	7.02755	6.98979	6.63578	7.01742	6.84758	7.01037	7.37614
Psme4	7.22378	7.03462	7.30541	6.61754	7.17567	7.03226	7.01345	7.06901	6.81692	6.77927	7.09424	7.04366
Asah1	6.9005	6.86513	6.97775	7.20982	6.90579	6.893	7.04849	6.93802	6.9232	7.21421	7.09424	7.22797
1810058I24Rik	6.7946	7.02951	6.90548	7.53385	7.04269	6.89459	6.87493	7.18248	7.19221	6.90203	6.81058	7.03214
Slc31a1	7.22208	6.83179	7.15086	7.00065	7.01337	7.00929	7.06649	6.93067	6.77969	6.99078	6.95051	7.24712
Eif3g	6.87835	7.08224	6.76486	7.00479	7.1581	7.00892	6.93552	7.0035	7.10073	7.05509	7.09373	7.08884
Mapk1ip1l	7.04094	6.93164	7.1611	6.63062	7.13596	7.02173	7.09565	7.11557	7.0377	6.96815	7.09574	6.92751
Bpnt1	6.87547	6.95135	6.82995	6.90578	7.0554	6.9504	7.0254	7.06805	6.9927	7.18833	7.24183	7.06591
Prkcsh	7.07526	7.05925	7.07752	6.8738	7.0281	7.06869	6.96121	6.91054	7.07284	6.84876	7.01143	7.16224
Atpif1	6.72423	6.90401	6.65684	7.75012	7.05885	6.91866	7.12726	6.72098	7.24316	7.38543	6.91051	6.73942
Gipc1	6.80902	7.24416	6.86534	7.1735	7.10516	6.84767	6.88868	7.01645	7.01742	7.15437	7.00181	7.00455
Wdr82	6.86024	7.1343	6.99454	6.86081	7.10683	6.98557	7.07226	6.88525	7.08653	7.00038	7.1241	7.01363
Top1	6.90263	6.99391	7.20052	6.73542	7.27141	7.00302	7.02269	6.99999	7.00649	6.89234	7.09424	6.99001
Tm9sf2	7.09213	7.04288	7.04426	6.86602	6.95165	6.87939	7.02973	7.01247	6.98228	6.88775	7.04773	7.27137
Akap8	7.00643	6.95808	6.98257	6.65792	7.19878	7.1767	7.00524	6.88199	7.01742	6.99772	7.0663	7.15115
Xpot	7.47109	7.34728	7.21246	6.92589	6.8156	7.04055	7.06175	6.85452	6.79247	6.89291	6.87757	6.77063
Adgra3	7.26787	7.32921	7.21492	6.88475	7.0771	7.14527	6.66028	6.77472	6.78609	6.56976	6.91564	7.42019
Man2a1	6.83226	6.8237	7.01351	6.48239	7.10516	7.02609	6.97809	6.88904	6.93981	7.09144	7.31659	7.53815
Cab39	7.25794	7.27091	7.13839	6.71101	6.93235	6.89896	6.97865	6.99497	7.05902	6.87158	7.01516	6.88914
Becn1	7.00313	7.06924	7.08022	6.9598	6.85975	7.13115	6.85801	7.10582	7.12873	6.95396	6.91507	6.94604
Ube2h	7.26236	7.30512	7.30963	6.50094	6.91025	7.19942	7.06912	7.09036	7.18557	6.69646	6.9878	6.48825
Ubxn4	6.95341	6.97012	6.94306	6.82847	7.0531	6.95842	7.05434	6.99044	7.00305	7.08895	7.13392	7.01256
Sf3b4	6.86678	7.21747	6.90954	6.71101	7.14302	6.9852	6.95611	7.0278	6.93838	6.88947	7.1388	7.20624
Sh3glb1	6.85292	6.99063	6.93512	6.91273	7.14356	6.90094	7.05858	6.95622	6.89976	7.05917	7.14416	7.13313
Ddx24	6.87113	6.89351	6.83688	6.77336	7.06515	6.86606	7.25231	7.20484	6.98298	7.1366	7.21756	6.87044
Pbxip1	7.31226	7.02375	7.34599	6.59339	6.9535	7.13823	7.08634	7.32897	6.9355	6.64235	6.86348	6.73684
Cnih1	6.68853	6.90471	6.66586	7.71336	7.04443	6.83943	6.8964	6.71305	7.0106	7.26195	6.82944	7.38604
Ddx39	6.74016	7.1834	6.66466	7.33866	7.03162	6.88981	6.61855	6.75048	7.03029	7.31501	7.08515	7.27937
Gnai3	7.14994	7.08101	7.13968	6.75943	7.00743	6.92374	7.00579	6.96292	6.89976	6.9246	6.98184	7.08884
Qars	7.00181	6.9781	7.10784	6.8338	7.03454	6.92218	6.93782	7.24093	6.83326	6.93963	7.06835	6.99756
Hpse	7.16537	7.00175	7.32299	7.03403	6.58075	7.05949	7.76626	6.71854	7.20422	7.31757	7.31141	5.38543
Sumo1	6.85512	6.97876	6.89428	7.23874	6.92985	6.88741	6.85314	6.99949	7.11671	7.27737	6.80752	7.02371
Stard7	6.97243	7.04097	6.90142	6.7988	6.96702	7.00265	7.01235	7.02878	6.93981	7.07842	7.02469	7.09338
Emg1	6.7831	7.06363	6.68845	7.46253	7.06515	6.82572	6.74028	6.86171	7.1394	7.20778	6.90306	7.11488
Elavl1	6.90758	7.06612	6.89785	6.88411	7.11734	7.00781	6.88571	6.90359	7.13752	6.90544	7.10675	7.02529
Cpsf2	6.83597	6.92134	6.78651	6.77198	7.10405	6.85301	7.21483	7.09834	6.96191	7.20962	7.09373	6.99163
Ccdc50	7.2485	6.97876	7.21164	7.12052	6.95843	6.94003	7.09462	6.99949	6.69965	7.03863	6.95273	6.5896
Wbp1l	7.11186	6.99391	7.06258	6.64963	7.10127	6.90529	7.00469	7.20571	6.96403	6.85288	6.91848	7.03109
Polr1a	7.02736	6.94255	7.05482	6.42705	7.21432	6.9167	6.97865	7.20092	6.81614	6.98864	7.10526	7.11687
Cd2ap	7.24683	7.12176	7.22024	6.73969	6.97738	7.00855	7.11765	6.93906	6.87593	6.95451	6.88747	6.6796
Unc5c	7.22717	7.1736	7.20424	6.80966	6.95288	7.26276	6.73433	6.69644	6.72238	6.7147	7.0002	7.2687
Fgfr1op2	6.97781	6.95808	6.85118	7.30835	7.00147	6.81399	6.83473	6.82709	6.87142	7.27912	6.98401	7.03004
Ash2l	7.01562	7.14673	6.9666	6.84043	7.05137	6.90766	6.90525	6.97011	7.03097	7.10879	6.91108	6.87396
Ptpn23	7.09956	6.86154	7.06121	6.46704	7.11624	7.17276	7.21531	7.0623	6.89532	6.88832	6.96873	6.92014
Tcn2	6.88482	7.0605	6.98353	7.16877	6.81695	6.97733	7.13932	6.81232	7.12051	6.83095	7.20969	6.71278
Tpx2	7.06771	7.16896	6.83582	6.84374	7.10905	7.03983	6.90525	6.90144	7.02489	6.75743	6.95605	7.0959
Fbxo42	7.30638	7.1857	7.3004	6.43584	7.07937	7.05023	7.12474	6.88958	6.84174	6.84639	7.04565	6.59886
Xbp1	6.89908	6.94458	6.85118	7.27837	6.98948	6.81903	6.84212	6.38322	7.05305	7.12593	7.23089	7.28379
Jmjd6	7.10634	7.00826	6.89479	7.24925	7.19982	6.85342	6.81106	7.0209	6.97669	6.95616	6.88979	6.73038
Ncbp1	6.94312	7.06425	6.93761	6.87768	7.06343	6.92919	6.8372	6.94428	7.00923	6.89805	7.03311	7.14144
Mettl9	7.11186	7.15672	7.00642	6.88732	6.99669	6.85465	6.84826	6.93749	7.01606	6.90601	6.89269	7.05716
Bnip2	6.86169	6.89281	6.93562	7.14859	7.01337	6.85383	6.89817	7.03614	6.95766	7.21008	6.85163	7.01096
Ergic3	6.86533	6.98471	6.86534	7.26709	6.90516	6.83072	6.92395	7.0065	6.98854	7.14959	6.93149	6.93765
Hip1	7.26402	7.00045	7.41642	6.55438	7.18464	7.07993	7.04209	7.4645	6.46427	6.70039	6.72482	6.75861
Ube2b	6.66284	6.82665	6.67423	7.66447	6.81356	6.88741	7.19908	6.77881	7.25707	7.32649	6.85816	6.7029
Zc3hav1	7.0202	6.80066	6.93612	6.57043	6.95412	6.89618	7.38056	6.99195	6.88864	7.16009	7.294	6.75607
Suclg1	6.88983	7.00371	6.84007	7.33679	6.85183	6.77388	6.84458	7.0209	6.95624	7.13805	6.97857	6.99271
Ap1b1	7.07715	7.04288	7.01021	6.56483	6.99908	6.93307	7.17196	7.03858	7.06034	6.83929	7.12312	6.76495
Tbc1d9b	7.01038	7.15203	7.05756	6.62063	6.87287	7.06939	7.16067	7.00899	7.02014	6.81473	7.0892	6.74777
Tfpi	6.71135	6.86226	6.74116	7.19644	7.05598	6.90687	7.04902	6.88633	7.02421	7.16341	6.83004	7.19501
Ppp3r1	7.03643	7.07544	7.00358	6.95858	7.01455	6.8485	6.89995	6.97725	6.94698	6.91505	6.98292	6.95328
Trrap	7.14576	6.77572	7.41678	6.3342	7.02693	7.13284	7.02161	7.17406	6.95979	6.69252	7.02785	6.90357
4931406P16Rik	7.09647	6.93915	7.09632	6.65491	6.95474	6.91513	7.44064	6.92064	6.8012	7.03915	7.11322	6.63668
U2surp	7.06644	7.07668	6.93761	6.75662	7.06857	6.96184	7.04583	7.0035	6.94197	6.97032	6.86052	6.91616
Ddx46	7.11002	7.07792	6.94898	6.63215	7.10628	7.14426	6.96347	7.01198	6.90049	6.83512	6.89385	6.97532
Lgmn	6.30397	6.54114	6.3383	7.11287	6.57595	6.71245	7.18558	7.14715	6.96897	7.4549	7.66123	7.56419
Dnmt3a	7.32816	7.09146	7.3985	6.39135	7.11734	7.15028	6.97921	6.99799	6.88117	6.68196	6.83908	6.70818
Sox11	7.32446	7.20281	7.29537	6.68618	7.21174	7.1816	6.75014	6.55345	6.71904	6.69318	6.65698	7.28687
Rbm28	6.92929	7.05172	6.88812	6.69133	7.11954	6.98333	6.91405	6.95777	7.03097	6.91618	7.02732	7.04939
Usp47	7.17888	7.06425	7.19347	6.52173	7.0577	6.98295	7.05593	7.01049	6.87066	6.83035	6.94103	6.84493
Sec31a	7.17184	6.92753	7.12537	6.45326	7.06515	7.02464	7.00304	6.97573	6.79247	6.9009	7.09574	7.00829
Ostc	6.81053	6.99718	6.771	7.43299	6.81151	6.81903	6.77803	6.4464	7.04439	7.25707	6.91336	7.46215
Eif3k	6.76919	6.93027	6.75531	7.35682	6.96089	6.85301	6.91346	6.92117	7.11734	7.17428	6.89442	6.89608
Kdelr2	6.95273	7.06799	6.87263	6.93707	6.98948	6.8415	6.80414	6.82878	7.06956	6.91223	6.90364	7.35234
Mgat4a	7.28372	7.1811	7.3336	6.79811	6.89233	7.05558	7.03511	6.86997	6.87142	6.63894	6.83246	6.73555
Slc25a13	6.89482	6.91166	6.95291	7.01069	7.18675	6.90727	6.83102	6.90198	6.87367	6.99399	6.94159	7.12132
Aak1	6.89837	6.68365	7.22594	6.47814	7.15971	6.93771	7.20531	6.84339	6.8083	7.10187	7.17587	6.98078
Msi2	7.23507	6.97677	7.35791	6.76432	6.95041	7.10491	7.2365	6.96292	6.83635	6.75681	6.83487	6.47439
Rbx1	6.66451	6.88999	6.69199	7.60337	6.8904	6.83736	6.80035	6.85008	7.05769	7.24053	6.93318	7.03109
Macroh2a1	6.88983	7.15964	6.85171	6.75873	7.08163	6.86158	6.86044	7.11	6.99132	6.87216	6.89789	7.14679
Taok1	7.2124	6.86154	7.28253	6.56162	7.03978	6.97206	7.05062	6.9354	6.78449	6.91505	6.94103	6.92298
Dhx36	7.11675	7.09329	7.13493	6.91838	6.93298	6.94925	7.01345	7.03663	6.90859	6.91674	6.85579	6.60169
Drg1	6.79612	6.9054	6.66945	7.40774	6.94731	6.82154	6.88451	6.90894	6.96403	7.23737	6.93935	6.99217
Pmpcb	6.78387	7.03653	6.86691	7.43912	6.93235	6.81525	6.89936	6.62996	6.8348	7.20916	6.9494	7.07666
Cav2	7.08153	6.65161	6.93612	7.32169	7.06914	6.70203	6.84764	7.1983	6.67829	7.40281	6.58579	6.99487
Usp4	6.95955	7.11816	6.89172	6.46447	6.97191	6.87738	7.1049	7.09412	7.07807	6.94461	7.05343	6.91045
Gatad2a	6.86968	7.01214	6.95193	6.59182	7.20398	6.86036	6.98868	6.90947	6.99409	6.92628	7.05911	7.10042
Selenow	6.42821	6.60603	6.61649	7.59044	6.7992	6.88781	7.08945	6.90091	7.06824	7.46147	7.10176	6.91502
Scaf1	7.06328	6.96545	7.09142	6.39586	7.04211	7.18875	7.09204	7.09224	7.03635	6.82376	7.01781	6.65592
Trp53	6.95887	7.20847	6.99502	6.86472	6.99008	7.11587	6.83102	6.95208	6.86083	6.72823	6.92132	7.03109
Alyref	6.79001	7.11032	6.75756	7.26856	7.20761	6.93229	6.70827	6.64927	6.91006	7.05355	6.90765	7.16032
Tmem33	6.94381	6.86298	7.04195	7.08799	6.93173	6.92452	6.84335	6.7475	6.90786	7.03656	6.93262	7.19454
Ak6	7.01955	7.07482	6.69434	7.45563	6.94545	6.76868	6.77868	6.78173	6.8968	7.21192	6.78526	7.03582
P3h3	7.29994	7.10729	7.27744	6.86472	7.07028	7.1254	6.94642	7.16246	6.8255	6.74418	6.81058	6.20181
Abcb7	6.95614	7.02246	7.04426	6.82713	6.94545	6.95956	7.06649	6.97522	6.79724	6.94902	6.92415	6.96709
Angptl2	6.63157	6.76193	6.82781	6.98217	6.99609	7.021	6.98534	7.21912	6.63191	7.11076	6.8173	7.44013
Ankrd17	7.17537	6.86799	7.23	6.39315	7.09176	6.92413	7.27934	6.93382	6.65134	7.01675	7.12804	6.71081
Ube2d2a	6.98385	7.06612	6.90193	7.07736	6.94545	6.83695	6.86226	6.88796	6.97318	7.00462	6.99321	6.85923
Slc1a5	7.43434	7.17128	7.09987	6.53406	6.66913	7.12132	6.90643	7.002	6.88938	6.84344	6.76708	6.95161
Arid1a	7.32816	6.93847	7.33284	6.51759	7.10683	7.13183	6.99532	6.82483	6.78449	6.73143	6.92132	6.75797
Abcd3	6.96567	7.0011	6.9534	6.82043	6.88134	7.01259	6.96404	7.001	7.04706	6.85347	6.96928	6.89724
Top2b	7.21525	7.15262	7.17632	6.49338	7.04501	7.01735	6.87132	7.13761	6.97879	6.66263	6.85579	6.74905
Maea	6.89695	7.08409	6.94898	6.81033	7.04036	6.81735	6.89877	6.99346	6.92683	6.9638	6.96543	6.98675
Supt16	6.93553	7.15496	6.89836	6.58156	7.10405	6.98893	6.91988	6.94011	6.97318	6.92795	6.88224	7.02265
Xpo5	7.11492	7.10001	6.92113	6.56403	7.05425	6.97958	6.93955	6.91533	6.89828	6.90941	7.08667	6.83472
Rab6a	7.16419	6.97146	7.06485	6.90705	7.06914	6.81062	6.87853	6.88471	6.79565	6.91618	6.96818	6.8839
Irf2bp2	7.49852	7.40065	7.24291	6.27862	6.87548	6.8526	7.11917	7.32618	7.1262	6.62661	6.65902	6.30112
Klhl9	7.00906	6.96612	7.01633	7.10573	6.91534	6.81314	6.98645	6.93592	6.87518	7.14719	6.86701	6.64908
Map1lc3b	6.82106	6.85434	6.87885	7.33725	6.84851	6.89936	6.93264	6.99899	6.98507	7.12056	6.72612	6.85923
Pten	7.00577	6.94594	7.10651	6.57043	6.96947	6.85546	6.99919	7.0454	6.89828	6.82975	7.07142	6.94437
Lasp1	7.07401	7.06986	7.08606	6.50094	7.04327	6.96828	6.86529	7.03418	6.63369	6.78112	7.17445	7.0024
Psmd12	6.69509	6.97677	6.71765	7.03113	7.01159	6.77041	6.89403	6.97725	6.93981	7.15246	6.96653	7.0969
Itfg1	7.07086	7.17822	6.98976	6.97435	6.92922	6.86443	6.79718	6.82086	6.97879	6.86984	6.78089	6.97039
Epha3	6.94312	7.2141	6.93114	6.56002	6.76302	7.24882	7.04048	6.47193	6.84634	6.75932	7.51523	6.93033
Setd3	6.84705	7.0655	6.93363	6.82111	6.86436	6.91356	6.89581	7.04588	7.05835	6.91899	6.93823	6.91502
Erlin2	6.91672	7.02887	6.96026	6.79811	6.88458	6.92452	7.06754	6.91852	6.95837	6.90884	6.87289	6.96929
Ftsj3	6.9005	7.06799	6.80241	6.60279	7.17408	6.79066	6.89403	7.1476	6.92392	6.90771	6.88224	7.10792
Mcam	7.10264	7.03143	7.13839	6.61212	7.33536	6.77863	6.33565	7.43068	6.63724	6.76808	6.18511	7.83939
Tab2	7.21867	6.98273	7.114	6.73756	6.77215	6.94465	7.07906	6.84283	6.79008	6.89976	6.8723	6.91958
Senp6	7.12345	7.25569	7.08247	6.51925	6.9166	7.00818	7.10028	6.82426	7.10586	6.72116	6.89385	6.61789
Smc6	6.95341	7.2546	6.87211	6.73329	6.96763	6.87738	6.85253	6.76943	6.98158	6.94682	6.98075	6.97914
Pfdn5	6.33368	6.57044	6.49087	7.83197	6.91216	6.84891	7.22288	6.79624	7.22795	7.53957	6.7384	6.62558
Mrps25	6.69509	6.90192	6.79695	7.22512	6.84585	6.87536	6.77353	6.86282	7.24839	7.09194	6.83366	6.97805
Trim44	7.10018	6.95875	7.17884	6.54709	6.98465	6.9588	7.19331	7.12295	6.79008	6.89577	6.85222	6.53796
Azin1	6.86896	6.92478	7.01774	6.99591	6.84718	6.91396	6.97473	6.81972	6.83789	7.04534	7.04461	6.80118
Pank3	7.27336	6.96545	7.49374	6.78373	6.99489	6.96184	6.98812	6.6952	6.78689	6.58755	6.84327	6.7154
Tmc6	7.04543	6.93506	7.06531	6.78304	6.90898	7.0602	6.82978	7.07331	6.73403	6.72759	6.78277	7.1346
Stx12	6.82181	7.01989	6.95193	6.79128	6.73095	6.90884	7.06438	6.99799	7.16543	7.02251	7.04617	6.54388
Tes	6.82704	6.80365	6.89683	7.3026	7.02341	6.70294	6.7237	6.82199	6.87518	7.23241	6.90936	6.92638
Birc6	6.98986	6.48536	7.18805	6.40125	7.18727	6.90411	7.04476	7.01148	6.692	6.96652	7.05808	7.10792
R3hdm1	7.32974	6.96812	7.26602	6.68397	7.0392	6.9626	7.08945	6.83048	6.64343	6.80564	6.81608	6.59743
Arl2bp	7.02671	7.10548	6.96417	6.91336	6.95905	6.90845	6.64416	6.97573	6.95197	6.77244	6.61903	7.19078
Rps6ka3	7.29564	7.1573	7.29498	6.4244	6.9147	7.02863	6.87853	7.006	6.81614	6.65657	6.89789	6.65387
Gsk3a	7.01235	7.1573	6.95635	6.71607	6.93298	6.93307	6.87433	6.98335	6.92972	6.73654	6.91621	6.87279
Glud1	6.95614	6.97876	6.70663	7.00479	6.93047	6.70157	6.77932	6.79393	6.81144	7.12933	7.16346	7.05871
Wdr43	6.91812	7.06799	6.78596	6.88475	7.05713	6.75909	6.91872	6.80143	6.85017	7.02981	6.9145	7.02582
Slc39a10	6.05023	6.19399	6.73661	6.72829	7.41464	6.74592	6.86408	7.51975	6.46526	7.54358	7.19851	7.54701
Rragc	6.78079	6.81853	6.8912	7.04957	6.81899	6.93771	6.92337	6.95052	6.98785	6.98918	7.00503	6.85507
Dclk2	6.92232	6.54651	6.98785	6.97857	6.84052	7.27504	7.02811	6.94948	7.02692	7.06782	6.62809	6.74006
Zc3h15	6.95887	7.01796	6.86378	6.8918	6.93361	6.85424	6.8568	6.9312	7.04973	6.83988	6.89789	6.88739
Nutf2	6.75906	7.20451	6.65201	7.00951	7.02928	6.893	6.64838	6.73068	7.13313	6.98704	6.86643	7.06231
Ezr	7.00906	6.75266	6.90548	6.40125	7.13542	6.91199	6.97529	7.02386	6.75541	6.97843	7.01463	7.09086
Rnf181	7.19052	6.92065	7.06303	7.049	6.85844	6.80046	6.86226	7.02633	6.98576	6.77741	6.92075	6.4997
Nras	6.84852	7.01924	6.93711	6.97254	7.03103	6.87657	6.81169	6.98183	6.87518	6.7805	6.90134	6.91103
Srsf7	6.62386	6.89842	6.77656	7.42462	6.99609	6.80808	6.65888	6.66009	7.00649	7.19531	7.02363	6.86396
Myef2	6.90121	6.9601	6.96563	6.90578	7.07028	7.09039	6.92337	6.77002	7.00237	6.83155	6.6563	6.84553
Ppm1h	6.50297	6.89491	6.71765	7.20572	6.98405	6.95575	7.0628	6.63125	6.93694	6.81654	7.1971	6.98078
Acox1	7.24292	6.83179	7.17884	6.56243	6.9311	6.97357	7.091	7.03614	6.79486	6.74861	6.93543	6.55196
Mkln1	7.02346	6.94594	6.88452	6.84638	6.95227	6.87254	6.81106	6.97317	6.9181	6.88315	6.91905	6.84852
Fmnl2	7.15352	6.88081	7.23808	6.61212	6.96824	7.03081	6.92917	7.226	6.52202	6.78483	6.77086	6.75479
Colgalt1	6.84558	7.02887	6.77322	7.07455	6.88846	6.75559	6.7716	6.77764	6.93189	6.84462	7.00983	7.15695
Nfx1	7.05884	6.90749	6.92765	6.83911	6.8156	7.06161	7.04956	6.71366	6.91518	6.86693	6.88108	6.8153
Tk1	6.71619	7.21466	6.60903	7.45693	6.91216	6.91827	6.66931	6.65118	6.82783	7.0556	6.90019	6.91787
Smg7	6.96295	6.86082	7.04195	6.54709	7.00684	7.025	7.09514	6.85341	6.97178	6.82616	6.84626	6.79933
Ppfia1	6.95819	6.7253	6.92815	6.80288	6.97191	6.93074	6.97249	6.94689	6.84864	6.86984	6.89442	6.98621
Rapgef4	6.87186	7.00241	7.08067	6.81775	6.68111	7.0715	7.12626	7.07854	7.09945	6.77555	6.9065	6.31329
Rnf126	7.11553	7.24472	6.86639	6.8969	7.02576	6.84479	6.8665	6.73551	6.86915	6.74418	6.84566	6.76051
Smc2	7.10572	7.07359	6.94553	6.62063	7.05655	6.91121	6.9384	6.72887	6.80278	6.80625	6.87172	6.95272
Tsnax	6.98986	7.08224	6.90701	6.88988	6.93548	6.92569	6.76123	7.04151	6.97108	6.83095	6.74354	6.70818
Sbf1	6.95955	6.88999	7.05345	6.49674	6.98102	6.91905	6.92046	6.95622	6.86462	6.78174	7.03311	6.92298
Psma2	6.68112	6.82001	6.63191	7.21085	6.85381	6.68694	6.83164	6.91746	6.93045	7.32225	6.93879	6.94325
Ddx54	6.99452	6.91651	6.9065	6.43671	7.10183	6.91749	6.88033	7.11511	6.86538	6.79282	7.06938	6.76368
Tsn	6.97243	6.98734	6.9386	6.74323	6.96824	6.86565	6.79146	6.9354	6.85323	6.92011	6.83848	6.93709
Ogt	7.04222	6.67795	7.21041	7.03229	6.80674	7.28692	7.15127	6.9742	6.87968	6.882	6.61202	6.19525
Glul	6.75984	6.85217	6.81381	6.54385	6.85381	6.91788	7.07279	6.97368	6.97879	6.8646	7.12804	6.99163
Itsn2	6.93414	6.7939	7.03036	6.75592	6.9535	6.90648	7.09565	6.73007	6.70558	6.90487	7.12065	6.81714
Pgrmc2	7.01038	7.00761	7.00406	6.86407	6.90132	6.89021	6.73962	6.89607	6.77888	6.61486	6.9065	7.13411
Hnrnpll	6.93622	6.92134	6.99263	6.84967	6.9786	6.81062	6.66862	7.03026	6.80672	6.95396	6.87582	6.91331
Nudt21	7.0332	7.21016	6.95977	7.04843	6.91787	6.85546	6.53738	6.80602	6.90344	6.77493	6.77839	6.89897
Farsb	7.06644	7.21747	6.92514	6.71318	6.79851	6.91239	6.8167	6.78406	6.98158	6.84107	6.89904	6.76748
Tnpo2	7.04094	7.01989	7.11619	6.54953	6.93736	6.90687	6.93206	6.73671	6.87743	6.77306	7.09172	6.74006
Zmiz2	7.03125	6.89842	7.1611	6.37041	6.99068	7.0538	6.91813	7.06422	6.79247	6.70821	6.86937	6.85745
Ide	6.77307	6.95875	6.75475	6.61367	6.86698	6.75208	6.87673	6.78813	6.90492	6.94516	7.235	7.24077
Ppme1	7.17478	7.16722	7.14012	6.84638	7.03629	6.78766	6.90701	6.96035	6.72988	6.66999	6.895	6.38912
Uba3	7.06644	6.89702	6.80077	7.06665	6.793	6.82489	6.89403	6.86777	6.77002	7.19484	6.80813	6.71015
Cerk	6.93345	6.90052	7.02383	6.59182	6.77843	7.0648	7.02973	7.24939	6.94483	6.76245	6.79148	6.61017
Ephx1	6.94793	6.60002	7.08471	7.02415	6.78192	7.02209	7.16559	6.98892	6.61851	6.57619	7.11273	6.75797
Nbr1	7.21411	6.75111	7.13363	6.5981	6.85579	7.06339	7.13481	7.26407	6.73568	6.70691	6.76834	6.44941
Taldo1	6.80751	7.13727	6.67363	7.30548	6.7847	6.8228	6.60775	6.74092	6.98088	6.80746	7.06271	6.92071
Ktn1	6.84779	6.93506	6.74684	6.49758	6.76231	6.86362	7.1333	6.87216	7.02489	6.9246	7.00235	7.03372
Agfg1	6.8841	6.81927	6.83635	6.69353	6.85975	6.72145	7.01235	6.93802	6.92827	7.05099	7.07754	6.81957
Tomm22	6.66201	6.97942	6.67423	7.26955	6.84917	6.76171	6.65958	6.8584	6.96403	7.07237	6.71701	7.17086
Cdk16	6.86533	6.96612	6.96368	6.70084	6.85579	6.94925	6.88987	6.74152	7.00168	6.7612	6.99644	6.92241
Gga2	6.94519	6.97544	6.83315	6.75943	6.87744	7.01808	6.98868	6.47698	7.00168	6.83572	7.08819	6.80918
Coro1b	6.7946	6.97146	6.82083	7.22359	6.7259	6.82822	6.9384	6.74631	6.8968	7.01517	7.05859	6.58817
Gna13	7.00972	6.88222	6.98881	6.36766	6.91597	6.8328	7.07384	6.92698	6.74475	6.9026	7.14416	6.80426
Kidins220	7.02476	6.79465	7.09454	6.39044	6.79162	7.06303	7.19908	6.64157	6.98924	6.65388	7.01143	6.9354
Tmem97	6.86823	6.778	6.68373	7.21749	7.08839	6.72772	6.65049	6.64029	6.74393	6.92348	6.84327	7.41173
Srp54a	7.15886	7.0655	6.97775	6.66839	6.83181	6.74371	6.94184	6.75524	7.16666	6.66128	6.89327	6.70092
Arhgef1	6.94931	6.94187	6.98208	6.50094	6.86041	7.08552	6.78444	7.10302	7.09816	6.72631	6.80199	6.72388
Agrn	7.15589	6.93096	7.19762	6.42793	6.79576	7.07432	6.88153	7.12065	6.70135	6.68196	6.84147	6.73878
Cops6	6.76218	6.85	6.82352	6.9543	6.99729	6.74592	6.68242	6.98487	6.86538	7.08845	6.97857	6.80979
Zyx	6.84263	7.33853	6.69081	6.21162	6.8949	6.80258	7.04689	6.75999	7.44744	6.89004	7.13978	6.47439
Atf6	7.30799	7.10183	7.10253	6.60201	6.40497	7.03189	7.41773	6.58721	7.08718	6.64982	6.91336	6.32706
Cdkn2aipnl	6.62815	6.72924	6.70313	7.41131	6.96396	6.78594	6.81169	6.75643	6.73568	7.08545	6.90994	6.99595
Dhx30	6.86823	6.96077	6.88195	6.60513	6.95843	6.88741	6.78572	7.003	6.90492	6.76183	6.99429	6.90472
Mrpl51	6.752	6.84638	6.8219	6.88988	6.98707	6.75866	6.67554	7.08422	7.05769	6.95341	6.79829	6.88856
Aldh18a1	7.61373	7.40263	7.15897	6.67509	6.44505	6.95651	7.06596	6.66579	6.79882	6.60302	6.79148	6.33646
Acp1	6.82256	7.01924	6.73375	6.99174	6.88458	6.72325	6.80792	6.88688	6.89309	6.9865	6.7544	7.00401
Ap2s1	6.6031	6.90401	6.69022	7.25869	6.86764	6.65864	6.72436	6.89175	7.12241	6.89862	6.95273	6.93259
Mcrip1	6.65614	6.92065	6.62206	7.50575	6.79714	6.82989	6.77417	6.82313	7.09106	6.95451	6.86112	6.66204
Gjb2	6.6494	6.51854	6.49492	6.42175	6.55331	6.69884	7.3293	6.8146	6.98437	7.05099	7.11768	7.83939
Ezh2	6.88553	7.18684	6.79859	6.98935	6.96273	6.93655	6.67691	6.68837	6.87893	6.78975	6.7384	6.94045
Irf2bpl	7.49383	7.19485	7.3336	6.27568	6.79714	6.90173	6.86287	6.89553	6.62746	6.53426	6.93374	6.60876
Tcirg1	6.48416	6.53845	6.503	6.67657	6.86107	6.90608	7.12424	7.00949	6.76517	7.23737	7.22998	7.12132
Fbxw11	7.02281	6.98471	7.03825	6.58788	6.89619	6.81819	6.86589	6.90091	6.84404	6.8458	6.89037	6.75861
Cds2	7.03965	6.91513	7.05528	6.58314	6.73957	6.89817	6.90936	6.97471	6.79882	6.78421	6.90822	6.83893
Lrp5	7.48771	7.09207	7.37817	6.41998	6.99008	6.93925	6.75667	7.0714	6.62568	6.36969	6.6433	6.67085
Elovl5	6.68442	6.69579	6.91055	6.81371	6.9204	6.81441	6.87613	6.66706	6.79644	6.87738	7.1427	7.24576
Fyttd1	6.99983	6.91858	6.95928	7.05414	6.76513	6.8826	6.88749	6.81972	6.69711	7.02199	6.84924	6.58459
Plaa	7.02476	6.9781	6.90345	6.69938	6.83248	6.79918	6.83226	6.98335	6.78289	6.89176	6.88747	6.80857
Slc35b2	6.60222	6.80141	6.57688	7.57859	6.83248	6.76476	6.67691	6.70076	6.80751	7.24097	6.6766	7.1584
Cops3	6.74412	6.93369	6.65201	7.42506	6.87287	6.71245	6.78316	6.56637	6.82473	7.14863	6.80752	6.94437
Os9	7.00643	6.72766	6.9156	6.54385	6.87744	6.90806	7.1049	6.9068	6.90639	6.73015	6.95882	6.82686
Psmd14	6.61524	6.80066	6.53419	7.34334	6.84052	6.68694	6.86408	6.68961	6.82005	7.38339	6.94159	6.87396
Cuedc2	6.7008	6.95202	6.60778	7.44783	6.87287	6.81019	6.79971	6.58521	7.07611	7.05509	6.69462	6.78879
Arid2	7.37688	7.00175	7.27076	6.4679	7.01159	7.05094	6.78892	6.90573	6.5524	6.67066	6.66106	6.63045
Ehd1	6.74885	7.02951	6.73489	6.76781	7.06	6.70385	6.64275	6.96601	6.90639	6.8381	6.93599	7.05198
Capn2	6.62214	6.77876	6.66406	6.56403	6.96763	6.90569	6.96573	6.89445	6.82861	6.85875	7.21387	7.11835
Tnks	7.25628	6.97212	7.27666	6.18892	6.87939	6.8838	7.08893	6.90573	6.62924	6.76683	6.86171	6.67017
Srp68	6.90616	6.86656	6.83582	6.59732	6.98042	6.83404	6.87913	6.85397	6.85779	6.84521	7.07601	6.83412
Agpat1	6.62472	7.0492	6.85434	6.91775	7.02517	6.8047	6.79401	6.76825	6.87217	6.62936	6.74547	7.27137
Rhob	6.95136	6.96812	6.73775	6.83712	7.00267	6.68556	6.53129	7.05508	7.09042	6.97951	6.8173	6.69496
Polr2b	6.99651	6.93983	6.92865	6.61135	7.02986	6.80003	6.87193	6.96908	6.78769	6.63347	6.84865	6.93259
Scyl1	6.98853	6.99588	6.93959	6.77406	6.84119	6.83943	6.89522	6.81289	6.90271	6.70496	6.91051	6.73878
Arhgap35	7.04991	6.87156	7.26484	6.41198	6.97252	6.95193	6.92627	6.73128	6.57478	6.66061	6.92867	6.99703
Plekha3	6.66952	6.98734	6.73661	6.87315	6.83717	6.72235	7.04262	6.96446	6.90344	7.01727	6.90019	6.68161
Emilin1	6.96499	6.69417	7.14571	6.4102	7.18989	6.8926	6.77224	7.32137	6.65222	6.65388	6.77526	6.85626
Hnrnpr	7.01038	7.03653	7.01351	6.60201	6.83851	7.04414	6.84703	7.08517	6.89012	6.61139	6.76582	6.57956
Rnf213	5.97411	5.78673	6.59588	5.90989	6.67513	6.70929	7.98548	7.66405	6.83016	7.83199	8.0335	6.31329
Hax1	6.84631	6.99914	6.614	7.65885	6.61629	6.77561	6.96008	6.58921	6.77728	7.12154	6.76771	6.57812
Gas7	6.87041	6.53034	6.88761	6.54872	7.31963	6.92452	6.83287	7.01892	6.50075	6.71405	6.93823	7.21738
Anxa4	6.91391	6.59484	6.89376	6.93583	7.12942	6.65535	6.9527	7.05412	6.54392	7.19438	7.03991	6.3924
Cbfb	6.833	6.98668	6.83795	6.80424	6.83114	6.86727	6.80288	6.81802	6.92392	6.91787	6.94327	6.72713
Acat2	6.76919	6.70702	7.0981	6.92464	6.97617	6.74724	6.66654	6.45374	6.81927	6.78421	7.13636	7.20437
Luc7l3	6.92092	6.93164	6.89734	6.85361	6.88652	7.05166	6.84458	6.62541	6.98854	6.7743	6.65221	6.8509
Ola1	6.88123	6.99391	6.91459	6.92089	6.85909	6.70476	6.74094	6.80373	6.82005	6.90487	6.77275	6.94939
Tmem268	6.53438	6.81036	6.6084	7.19489	6.50357	7.13823	7.12069	6.6319	7.07349	6.81594	7.01887	6.81469
Ube2m	6.65698	6.91443	6.71708	7.04671	6.87222	6.75076	6.70895	6.9448	7.01401	6.79833	6.79396	7.04575
Dgkz	6.76764	6.85	6.90396	6.72255	6.95782	6.87858	6.88093	7.004	6.61762	6.77555	6.93318	6.97203
Mllt1	6.83226	7.05988	6.92264	6.68766	6.87939	6.91042	6.80098	6.70999	6.85399	6.66464	7.0109	6.92071
Eif1a	6.83226	6.86656	6.7002	7.03518	6.87418	6.63311	6.82419	6.60116	6.88267	7.12933	6.97584	6.89146
Ube3c	6.95955	6.98074	7.00879	6.56243	6.86567	6.85014	6.87553	6.90466	6.63547	6.78174	6.96378	6.84553
Ss18l2	6.74412	6.71738	6.73889	7.41576	6.86633	6.935	6.68516	6.71915	7.03702	7.00621	6.45482	6.91217
Ube2n	6.67616	6.81408	6.63681	7.13624	6.99848	6.69839	6.85436	6.70815	6.98715	7.04328	6.73712	6.94101
Usp24	7.20839	6.75576	7.16619	6.43496	6.93798	6.96828	6.98534	6.7228	6.49392	6.76496	6.93655	6.84553
Ints1	7.01759	6.91513	6.96173	6.17953	7.11237	6.94041	6.83473	6.90734	6.77486	6.67532	6.93262	6.96434
Map2k3	6.55525	6.77419	6.70604	7.02065	6.89619	6.72414	6.74094	6.99999	6.90859	6.94902	6.98455	6.9505
Myo1c	6.9118	6.81853	6.88246	6.30859	6.86502	6.91317	6.98088	7.0488	6.69711	6.80564	7.05084	6.91502
Ubr2	7.30905	6.84129	7.17338	6.47814	6.74315	7.02063	7.03887	6.85452	6.62746	6.66464	6.79272	6.64496
Rictor	6.70973	6.63405	6.81002	6.59732	6.8994	6.98893	7.20722	6.78581	6.81065	6.97032	6.91564	6.85626
Setd7	6.90969	6.91927	7.17211	6.51345	6.99309	7.01149	6.88511	6.73911	6.62746	6.72438	6.8546	6.82808
Pom121	7.04286	6.93301	7.03593	6.31432	7.05483	6.98557	6.82481	6.74211	6.65222	6.60162	6.79272	7.18842
Ost4	6.61611	6.86441	6.77434	7.54405	6.91089	6.82656	6.80161	6.7974	7.01538	6.89805	6.54221	6.57018
Wiz	7.22151	6.9926	7.11136	6.36674	6.91724	7.025	6.87493	7.04491	6.66705	6.5946	6.71896	6.62558
Ruvbl2	6.84779	7.08409	6.67005	7.01714	7.04501	6.78294	6.59322	6.75287	6.78849	6.8646	6.85222	6.84553
Sdf4	6.75671	6.75962	6.63068	7.26216	6.78816	6.68003	6.87853	6.7475	6.75541	7.0438	6.77086	7.06694
Pcdhgb2	7.15292	6.88788	7.08292	6.46704	6.99429	6.97958	7.12272	6.72765	6.51914	6.63826	6.80568	6.74969
Wasl	7.17243	6.98141	7.08516	6.29416	6.79989	6.95231	7.05487	6.90037	6.85627	6.70039	6.71831	6.59601
Arfgef1	6.87113	6.86656	7.01821	6.50846	6.89619	6.84026	6.90525	6.88416	6.75704	6.82616	7.01834	6.71932
Tma7	6.41635	6.67713	6.6202	7.41576	6.95905	6.87778	6.8217	6.61104	7.00443	7.13805	6.65562	6.90127
Ube3a	7.06897	6.85578	7.08695	6.46961	6.9311	6.79748	7.05115	6.71488	6.62299	6.85875	6.95882	6.67624
Jmjd1c	7.2038	6.84347	7.17506	6.63596	6.83315	7.02537	6.8671	6.76295	6.58216	6.75303	6.67121	6.73038
Slc30a9	6.95614	7.03398	7.02055	6.74959	6.81288	6.82739	6.84274	6.89283	6.89384	6.71211	6.6631	6.67624
Ube2c	6.806	7.14142	6.70546	7.18345	6.83651	6.75866	6.50358	6.55618	7.14315	6.54813	6.71439	7.17943
Zfp91	6.93622	6.81334	6.95193	6.58552	6.89297	6.83404	6.99808	6.62931	6.69711	6.83869	6.93374	6.96324
Tmcc2	6.86533	6.92616	7.11795	6.76362	6.73671	7.03515	7.00743	6.81802	6.82317	6.54376	6.81364	6.61719
Ppp4r1	6.96431	6.89562	6.94108	6.64053	7.02693	6.78079	6.74686	6.73189	6.75948	6.82736	6.81791	6.93371
Cul4a	6.88911	6.86513	6.99311	6.50261	6.8156	6.85669	6.8568	7.13943	6.77969	6.91223	6.81791	6.62975
Ergic1	6.83077	6.90888	6.82244	6.71679	6.99489	6.82614	6.8142	6.73128	6.67397	6.76371	6.84745	7.12675
Nptn	6.78233	6.74256	6.77156	7.03576	6.79714	6.8571	6.65539	6.88796	6.76841	6.86751	6.71766	7.17325
Mkrn1	7.18238	7.0011	6.98689	6.6928	6.86698	6.83197	6.81106	7.11557	6.83712	6.67066	6.74226	6.30635
Hs2st1	6.83893	6.74256	6.9386	6.83712	6.92733	6.83404	6.5778	6.89067	6.64959	6.75114	6.77275	7.26602
Ppp6r3	7.0582	6.88152	7.06076	6.50345	6.82643	6.93113	6.84948	6.81574	6.74886	6.68923	6.83848	6.8214
Amd1	6.67201	6.71976	6.8459	6.99233	6.94545	6.73441	6.52671	6.77998	6.70135	6.88718	6.89846	7.29171
Frmd4a	6.7653	6.51306	6.93264	6.70157	6.95659	6.9546	7.0378	6.86392	6.69285	6.83572	6.86996	6.86985
Adipor2	6.87475	6.95405	6.99407	6.77406	6.7847	6.72504	6.87132	6.68775	6.67743	6.70561	6.97748	6.96103
Tmem41b	7.07338	6.78937	7.00358	6.95247	6.80126	6.75691	6.73367	6.55003	6.68344	6.80686	6.74162	7.08934
Hsph1	6.24376	6.63321	6.67363	6.96163	7.05079	6.74592	6.46977	6.51677	7.11861	6.89119	7.24953	7.41495
Dpp8	6.86096	6.88576	7.0243	6.5776	6.77843	7.0513	6.96686	6.75465	6.71232	6.76558	6.82278	6.76305
Poldip2	6.7354	6.70702	6.74741	7.11177	6.84652	6.79493	6.85497	6.82029	6.70643	7.06782	6.75186	6.81775
Rfc1	7.01169	6.99784	6.90498	6.47303	6.85909	6.87617	6.87012	6.88416	6.7676	6.7712	6.77338	6.77126
H2aj	6.81129	6.87299	7.0484	7.23974	7.00386	6.72055	6.38373	7.09694	6.71652	6.84403	6.55177	6.66611
Tpp2	6.99053	6.88293	6.97581	6.43057	6.90196	6.84108	6.91872	6.97624	6.73816	6.80199	6.84626	6.64839
Galnt2	6.91602	7.01279	6.96026	6.81033	6.99848	6.83321	6.70016	6.75168	6.64254	6.60232	6.74739	6.97258
Tmem51	6.44483	6.76731	6.55569	7.32595	6.50273	6.77906	6.94585	6.81346	7.02489	6.87738	6.94884	6.95716
Arpc1a	6.78233	6.77572	6.82888	7.08855	6.81967	6.80935	6.63496	6.90947	6.83326	6.871	6.67861	6.90702
Chmp1a	6.81505	6.85217	6.71186	6.98037	6.8156	6.7868	6.73962	6.85563	6.79644	6.9567	6.83246	6.79562
Rap1b	6.51968	6.63825	6.41375	7.31265	6.75737	6.56623	6.84151	6.65946	6.82783	7.36041	7.04825	6.97586
Gbf1	7.0202	6.82959	7.07391	6.4244	6.88198	6.8838	7.02161	6.75821	6.84941	6.56403	6.97475	6.62975
Casd1	6.78618	6.94932	6.90294	6.8298	6.88198	6.92997	6.7049	6.81574	6.80041	6.72438	6.62043	6.95328
Ptcd3	6.68195	6.85506	6.64595	6.94633	6.93486	6.71516	6.78828	6.65437	6.78209	7.10138	6.78775	6.99703
Mcm4	6.74333	6.96345	6.7508	6.48747	6.99429	6.82947	6.65609	6.86557	6.90786	6.76808	6.9802	6.91844
Selenbp1	7.56042	7.24802	7.36826	7.19489	7.05425	6.85955	6.87793	7.09318	6.55803	6.55031	6.39074	5.10866
Atp6ap2	6.9383	6.85867	6.79968	6.79607	6.62329	6.75208	6.78252	6.78813	6.97037	6.83691	6.81486	6.903
Rtraf	6.65614	6.82444	6.63068	7.10352	6.84119	6.70657	6.78572	6.71732	6.92683	7.07035	6.6267	6.97039
Stag1	6.84999	6.91374	6.82781	6.60591	7.01159	6.83612	6.80414	6.80889	6.70135	6.81231	6.73454	6.95272
Snrpd2	6.5011	6.82665	6.51436	7.55337	6.99489	6.72995	6.63496	6.63578	6.85627	7.12739	6.8246	6.65796
Prdx6	6.74412	6.77495	6.65684	6.92214	6.8156	6.83653	6.58443	6.90573	6.86689	6.73846	6.80752	7.1837
Orc2	6.72823	7.00241	6.71186	7.09633	6.87026	6.66565	6.68104	6.54454	6.61402	7.09144	6.78526	7.03057
Nsfl1c	6.72743	6.778	6.724	6.84374	6.92166	6.80173	6.75014	6.82143	6.92972	6.84403	6.89731	6.77943
Selenop	6.2986	6.48816	6.17611	7.41843	6.36189	6.73218	6.97192	6.62801	7.02218	7.27693	7.06065	7.36783
Psma5	6.33263	6.70142	6.41803	7.1619	6.78192	6.5552	6.78316	6.79855	6.94125	7.39758	7.0077	6.91502
Tubb3	6.87979	6.67468	6.98305	6.30188	6.96335	6.51797	6.78572	7.37029	6.73071	7.12007	6.81486	6.64083
Zfand3	6.87113	6.96345	6.72745	6.58867	6.65097	6.81314	6.9309	6.81403	6.9605	6.84284	7.04304	6.55928
Lsm4	6.60484	6.91789	6.56921	7.34241	6.76442	6.59345	6.43678	6.7794	7.09106	7.07641	6.78962	6.7981
Pkn1	6.95068	6.98405	6.95684	6.29029	6.78261	6.80808	7.03296	6.8316	6.80514	6.83691	6.94773	6.535
Etfa	6.74491	6.86799	6.68727	6.94202	6.67813	6.79066	6.77803	6.60248	7.01469	7.00779	6.87757	6.76115
Dock1	7.11858	7.02695	7.1594	6.26487	6.85975	6.96601	6.86408	6.87106	6.72405	6.52985	6.78089	6.58315
Npc1	6.89837	6.59915	7.05985	6.35752	6.81763	6.84067	6.98367	6.79393	6.76111	6.69318	6.97256	6.96709
Rnf7	6.52061	6.78104	6.53484	7.49947	6.78539	6.71606	6.82357	6.55003	6.90859	7.21329	6.72936	6.68094
Ak3	6.61697	6.77495	6.60715	6.74394	6.77494	6.69747	6.88332	6.71366	6.84481	7.00621	6.98564	7.09187
Mvb12a	6.62815	6.86799	6.52431	7.19592	6.81899	6.69245	6.84887	6.68713	6.9927	7.02721	6.88224	6.5738
Cdt1	6.77307	7.02695	6.58831	6.56563	6.89233	6.66518	6.58883	6.88199	6.85323	6.91843	6.91165	7.06334
Akt2	6.77074	6.8801	6.80513	6.78579	6.85975	6.78508	6.73566	6.74152	6.91079	6.66061	6.91279	6.87396
Ankrd52	6.9104	6.72766	7.15257	6.2747	7.06286	6.96298	6.82916	6.71732	6.57847	6.71081	6.88806	6.9007
Ltbr	6.86169	6.81111	6.74344	6.96345	6.82912	6.72906	6.8054	6.87052	6.67311	6.86518	6.68931	6.86985
B230219D22Rik	7.09832	6.84855	7.06803	7.13462	6.74386	6.89697	6.6776	6.82596	6.55709	6.76933	6.56707	6.51483
Sh3pxd2a	7.04286	6.74178	7.25571	6.49506	7.25096	6.9045	6.58809	6.55754	6.49098	6.47892	6.46419	7.41978
Gbe1	7.43874	6.83691	7.23969	6.66839	6.94979	6.69428	6.95441	7.06518	6.57755	6.67333	6.60215	5.98648
Ptprj	7.06391	6.68446	7.20176	6.24	6.99189	6.8357	6.83843	7.11511	6.55146	6.66196	6.66242	6.83472
Rhoc	6.72743	6.84638	6.82513	7.0991	6.80469	6.71471	6.70692	7.12709	6.8684	6.90431	6.56489	6.49131
Ddx27	6.74412	7.05172	6.67423	6.62294	6.89168	6.81567	6.81545	6.84115	6.76436	6.79833	6.79952	6.85804
Dtnbp1	6.59435	6.89982	6.54921	7.06438	6.79989	6.7838	6.80981	6.76767	6.77406	6.98489	6.8546	6.7863
Sgsm2	6.53803	6.89912	6.51236	6.87509	6.85909	6.75909	6.9076	6.53626	6.86235	6.96598	6.99483	6.95494
Ogfr	6.5687	6.58617	6.55892	6.55195	6.8081	6.60857	7.15226	7.1476	6.86311	7.13998	7.17872	6.48134
Klf6	7.04736	6.97012	6.50501	6.5768	6.65249	6.72951	7.00194	6.88144	6.90859	7.1395	6.895	6.33731
Spag9	6.9118	6.71817	6.97678	6.7023	6.81083	6.84191	6.87493	6.83835	6.48114	6.80989	6.82095	6.85626
Efr3a	6.95478	6.77876	6.9816	6.65792	6.69669	6.75032	6.9158	6.8043	6.62389	6.80928	6.98889	6.6796
Kdm5a	7.05693	6.87584	7.06531	6.61754	6.71865	6.91866	7.00249	6.79682	6.61312	6.76433	6.83547	6.36512
Ppp4r3a	6.83002	6.93438	6.86482	6.54385	6.99669	6.87294	6.85253	6.6038	6.80199	6.77306	6.74418	6.79252
Cpd	7.039	6.81705	7.08874	6.21876	6.86173	6.77474	6.71433	6.87763	6.57663	6.60791	6.91621	7.11439
Drosha	6.80978	6.87939	6.87937	6.54466	7.02105	6.8357	6.84519	6.81175	6.64254	6.57191	6.8723	6.88565
Bcl2l13	6.76841	6.94594	6.86899	6.78166	6.79231	6.73929	6.66793	6.61694	6.66792	6.84107	7.02522	6.87748
Vps25	6.7178	6.83032	6.70254	7.03287	6.69595	6.77949	6.75863	6.97215	6.96332	6.73846	6.71896	6.68027
Med13	7.12649	6.90749	7.10342	6.23598	6.68409	6.94157	6.94928	6.69644	6.84941	6.69973	6.94606	6.44705
Dnajb6	6.82106	6.83252	6.71996	6.76781	6.8081	6.73441	6.84151	6.89768	6.91006	6.78914	6.78713	6.66882
Rabep1	6.75749	6.90749	6.7508	6.63673	6.73957	6.85055	6.88451	6.55003	6.86991	6.8866	6.98618	6.7567
Retreg3	6.68195	6.81036	6.73261	7.08966	6.65021	6.73441	6.81106	6.66009	6.66444	6.93963	6.93262	6.84194
Nup88	6.86896	6.93301	6.70313	6.68028	6.82912	6.76259	6.67416	6.84115	6.79644	6.80625	6.79024	6.85923
Mydgf	6.75749	6.75034	6.63619	7.15978	6.87874	6.69382	6.68447	6.41441	6.71401	6.8952	6.75885	7.1889
Golga4	7.07275	6.45045	7.16831	6.20341	6.83851	6.94541	7.07384	6.90947	6.67052	6.64167	6.80322	6.75224
Ei24	6.84631	6.778	7.0243	7.07736	6.70625	6.8328	6.68858	6.84897	6.7005	6.56187	6.50259	6.96158
Tnfrsf1a	6.89979	6.82149	6.77822	6.57998	6.68186	6.60176	6.77868	6.97062	6.71316	6.741	6.96543	6.99487
Map7d1	6.83967	6.82591	6.87263	6.30092	6.83717	6.71606	6.81545	6.82935	6.77083	6.70039	7.05395	6.95217
Fip1l1	6.95887	6.90331	6.89887	6.50178	6.85116	6.81903	6.87193	6.87981	6.74558	6.68262	6.78152	6.61579
Rab1b	6.68853	7.0115	6.77767	6.95247	6.88328	6.72861	6.64133	6.75287	6.73154	6.66799	6.87348	6.7919
Slc39a14	6.98986	6.64244	6.83742	6.77544	6.69003	6.78079	7.04529	6.95725	6.55052	6.76183	6.54369	6.92355
Prelid3b	6.58644	6.83618	6.5826	7.00124	6.89876	6.68003	6.71164	6.66643	6.85703	6.96924	6.72677	6.97969
Chmp3	6.66618	6.84928	6.64656	6.99531	6.81899	6.75164	6.71231	6.84506	6.84864	6.88372	6.82095	6.6525
Ddx42	7.09771	6.90819	6.94898	6.40663	6.73455	6.8693	6.9193	7.07044	6.84941	6.62385	6.59506	6.46352
Prkacb	6.81656	6.81779	6.94009	6.60902	6.85315	6.86727	6.89758	6.81972	6.62299	6.65859	6.92924	6.65387
Gpat4	6.6836	6.86226	6.75588	6.73898	6.83584	6.7043	6.57262	6.72584	6.85323	6.77306	6.79024	7.18984
Rhog	6.3628	6.52581	6.55116	6.77683	6.77704	6.68878	6.79908	7.14489	7.01878	6.90431	6.89673	7.03896
Srcap	6.88911	6.52309	7.04702	6.39586	7.00028	7.09524	7.06859	6.61825	6.48016	6.76621	6.73518	6.861
Idh3b	6.72262	6.63825	6.7286	7.02939	6.75878	6.70838	6.82792	6.69272	6.79486	7.01675	6.87289	6.67759
Cyfip2	7.07023	6.91513	7.13925	6.25696	6.84652	6.82238	6.97136	6.69024	6.54487	6.60302	6.83607	6.75033
Enpp2	6.70811	7.15379	6.58767	7.03171	6.60375	6.97168	6.55098	6.14828	7.12305	6.62247	6.71896	7.21135
Tulp4	6.75357	6.52943	7.03176	6.43057	6.87939	6.89419	6.97361	7.07283	6.4841	6.74861	6.84147	6.77943
C1qtnf6	6.94725	6.8907	6.96854	6.70375	6.6441	6.85178	6.65469	7.09083	6.69285	6.50835	6.54148	6.91844
Kansl2	6.79536	6.82665	6.83582	6.7023	6.83382	6.75515	6.68995	6.84562	6.77325	6.67599	6.75249	6.92525
Add1	6.76608	6.75653	6.85066	6.59653	6.79024	6.74944	6.92917	6.8738	6.81692	6.76433	6.85222	6.65932
Neo1	7.26512	7.00955	7.153	6.242	6.77355	6.93848	6.77353	6.69767	6.54203	6.3787	6.76645	6.83954
Ndufb5	6.56065	6.93438	6.68963	7.00833	6.70331	6.66891	6.61999	6.70753	7.02421	6.85875	6.73454	6.8675
Rab5b	6.65277	6.56339	6.7136	6.95675	6.6395	6.83695	7.201	7.17184	6.79486	6.741	6.77777	6.31761
Lig1	6.72342	7.058	6.52298	6.63901	6.95843	6.8838	6.64768	6.66958	6.85551	6.69252	7.01993	6.69496
Usp39	6.81129	6.90331	6.72054	6.86797	6.86239	6.6168	6.68447	6.74571	6.67829	6.77555	6.85103	6.83713
H13	6.75828	6.86799	6.64291	6.69646	6.67513	6.68878	6.75537	6.77764	6.90933	6.68659	6.84865	7.04418
Pcnp	6.72982	6.83618	6.61587	7.0148	6.80194	6.72727	6.74226	6.51747	6.79247	6.89691	6.70783	6.96324
Ndufv3	6.92441	6.65824	6.95291	7.01186	6.92607	6.84521	6.92105	6.85175	6.80751	6.78298	6.56489	6.09816
Snx27	6.71941	6.75034	6.72917	6.53324	6.97191	6.82112	6.77996	6.54247	6.78929	6.74798	7.02732	6.91958
Vps26a	6.52797	6.55808	6.66826	7.14377	6.79714	6.68556	6.88332	6.62086	6.72738	7.06019	6.89269	6.76495
Ubr3	7.11125	6.83105	7.17422	6.30763	6.9026	6.90173	6.99974	6.70999	6.48114	6.58684	6.77526	6.54609
Clns1a	6.55975	6.79766	6.54986	7.21698	6.81763	6.57718	6.68104	6.75643	6.72572	7.01622	6.66986	6.95771
Golga7	6.71619	6.84274	6.7508	6.85885	6.81424	6.73973	6.62357	6.85286	6.91518	6.81775	6.65357	6.72843
Renbp	6.60918	6.8029	6.58767	6.82043	6.68707	6.79918	6.83473	6.73911	7.15062	6.81534	6.95495	6.48672
Clint1	7.04864	6.8044	6.89938	6.53733	6.69964	6.81146	6.78316	6.69458	6.72488	6.67133	6.96543	6.64496
Rbmxl1	6.57405	6.93027	6.56472	6.95553	6.85909	6.70748	6.57854	6.82369	6.77567	6.9026	6.77526	6.8311
Arpp19	6.61438	6.74022	6.81056	7.05357	6.8696	6.82028	6.72503	6.86942	6.89161	6.78729	6.65221	6.44152
Uqcrb	6.5687	6.73709	6.57049	7.00065	6.83918	6.71966	6.84335	6.72947	7.12178	6.8646	6.46885	6.81041
Golga2	7.00313	6.63405	6.91963	6.3759	6.80126	6.80639	7.06438	6.91533	6.74064	6.63894	6.68797	6.6863
Ilk	6.70405	6.93164	6.64716	7.06495	6.73023	6.69153	6.75928	6.68088	6.92465	6.86576	6.68464	6.58674
Sypl	6.86678	6.77343	6.77988	6.57441	6.70625	6.80131	6.66515	6.80946	6.91079	6.73335	6.71243	6.92977
Xrn2	6.93968	7.02823	6.69903	6.51012	6.75808	6.76389	6.8304	6.7753	6.72738	6.81775	6.76708	6.63253
Trir	6.75749	6.97478	6.73089	6.71463	6.88781	6.75953	6.66028	6.80889	7.06627	6.58401	6.56634	6.73297
Glo1	6.63584	6.90261	6.73775	6.86991	6.80674	6.76651	6.46739	6.84451	6.81222	6.69777	6.72482	6.94325
C2cd2l	7.06897	7.06799	7.12712	6.55518	6.79507	6.86646	6.54495	6.52655	6.72572	6.36804	6.70915	6.84613
Cmtm4	6.84337	6.99849	6.86534	6.41998	6.70698	6.78508	6.83226	6.57918	6.91591	6.64846	6.81058	6.78879
Snx6	6.57582	6.88505	6.521	6.78991	6.66838	6.61824	6.78828	6.77647	6.96403	6.9026	6.88922	6.81408
Cfl2	6.65193	6.86656	6.6084	6.76711	6.57354	6.66425	6.81232	6.77472	7.06824	6.80321	6.77526	6.81896
Strip1	6.87402	6.89842	6.83048	6.68323	6.98526	6.71966	6.76058	6.98741	6.55616	6.54522	6.67861	6.6525
Aldh9a1	6.9005	6.97012	6.81327	6.94817	6.71137	6.78208	6.70962	6.60841	6.66705	6.71664	6.86878	6.46663
Btf3l4	6.81129	6.93369	6.65624	7.08855	6.67063	6.74283	6.77611	6.84003	6.72655	7.0407	6.49728	6.37593
Reep3	6.94243	6.81557	6.97291	6.58946	6.85579	6.84397	6.62428	6.6721	6.54392	6.52911	6.60003	7.15984
Pygb	6.67201	6.93027	6.83475	6.21162	6.80057	6.83363	6.87132	6.73671	6.94769	6.58046	7.0093	6.71867
Ap3b1	6.94312	6.95741	6.86064	6.51594	6.73957	6.78423	6.96855	6.76176	6.65747	6.5939	6.79705	6.56146
Dynlrb1	6.60571	6.78635	6.62884	7.16137	6.71283	6.61099	6.66585	6.68713	6.84711	6.80625	6.74675	6.88099
Actr10	6.69835	6.83105	6.6034	7.07792	6.74172	6.58312	6.72769	6.80832	6.81536	6.88545	6.69396	6.6722
Pmf1	6.49077	6.80141	6.40013	7.27053	6.80742	6.70294	6.53129	6.50834	6.91079	6.93241	6.76455	7.01096
Pdhb	6.86678	6.68852	6.75756	6.929	6.61551	6.70566	6.59977	6.94689	6.71484	6.80625	6.63917	6.8515
Tufm	6.4936	6.79088	6.59399	6.68545	6.9166	6.70883	6.58443	6.64863	6.92102	6.74987	6.95992	7.06745
Gramd1a	6.89054	6.57658	6.90903	6.65942	6.64716	6.91239	6.70895	6.91107	6.78049	6.67133	6.71962	6.73167
Cdca3	6.75279	6.99718	6.58641	7.15765	6.83517	6.78723	6.45779	6.51677	6.8012	6.55754	6.53704	7.13117
Pikfyve	6.76452	6.56692	6.91963	6.35659	6.61629	6.80555	7.0628	6.81859	6.80514	6.8866	6.9959	6.51558
Fbrs	6.84337	6.61543	6.83954	6.04584	6.92544	6.8814	7.06702	6.98487	6.89902	6.80928	6.8246	6.37676
Zmynd8	6.82555	6.7253	6.95879	6.46361	6.78955	6.90173	6.93955	6.83048	6.88416	6.56976	6.8112	6.40301
Zmynd11	6.79917	6.9601	6.8912	6.63367	6.73957	6.84273	6.82543	6.65755	6.75377	6.6321	6.72482	6.64221
Ap3m1	6.82704	6.81927	6.8219	6.71752	6.92985	6.64072	6.63425	6.84171	6.67743	6.63758	6.73454	6.82018
Tubg1	6.55975	6.82296	6.66226	6.96223	7.02164	6.67772	6.58001	6.52097	6.73403	6.63621	6.83667	7.07768
Sulf2	7.03707	6.28785	7.22553	6.1435	7.4088	6.77388	6.27138	7.39985	5.63413	6.58046	6.41591	7.90688
Tsc22d4	6.95614	7.0115	7.00973	6.37224	6.76724	6.68832	6.71029	6.99296	6.73237	6.55031	6.75631	6.535
Lemd2	6.82779	7.10183	6.68254	6.58156	6.65705	6.81819	6.787	6.82369	6.87443	6.56833	6.78089	6.57235
Scamp3	6.49735	6.82075	6.71418	6.66989	6.80057	6.72951	6.68104	6.70138	6.85399	6.63553	6.85638	7.11389
Nup188	6.88195	6.93983	6.86534	6.28932	6.85712	6.79961	6.86287	6.64799	6.74886	6.63758	6.91336	6.62836
Eid1	6.61956	6.90471	6.48205	6.78648	6.98948	6.70929	6.68927	6.91852	6.85931	6.81775	6.56924	6.72193
Lrp10	6.83597	6.74645	6.88658	6.07764	6.86895	6.71019	6.83905	6.93435	6.72821	6.69777	6.90708	6.8153
Stk25	6.88697	6.6974	6.79366	7.20726	6.65477	6.77171	6.692	6.71488	6.64343	6.90317	6.58865	6.49208
Lrpprc	6.80069	6.97942	6.81867	6.34264	6.71356	6.72145	6.78252	6.68213	6.98646	6.68395	6.84507	6.68496
Spred1	7.06897	6.99194	7.03036	6.57362	6.66612	6.86889	6.71433	6.58788	6.66183	6.59601	6.63087	6.64771
Bin3	6.39839	6.49373	6.43078	7.05357	6.73814	6.57718	7.02378	6.97113	6.86007	7.23512	6.71831	6.52681
Pkp4	6.70161	6.79315	6.72745	6.47985	6.75454	6.80766	6.80414	6.66009	6.77647	6.61417	6.82035	7.06077
Fnip2	6.50203	6.46187	6.62576	6.72829	6.71502	6.92062	6.99034	6.68088	6.6757	6.80564	6.85756	7.0274
Tnfaip1	6.83671	6.78559	6.76093	6.50428	6.70771	6.82572	6.77353	6.54934	6.78049	6.63894	7.00342	6.81591
Ap1g1	6.93899	6.90122	6.97775	6.43057	6.81763	6.79833	6.88749	6.67462	6.60045	6.61139	6.75122	6.58602
Bcap31	6.5687	6.58791	6.58387	7.09799	6.56386	6.69428	6.55173	6.84451	6.76679	6.99719	6.75949	6.94827
Man2b2	6.93414	6.7939	6.9151	6.31623	6.75028	6.80258	7.07436	6.76649	6.67397	6.58613	6.96708	6.36261
Gna11	6.72423	6.78559	6.93661	6.67954	6.83047	6.69975	6.69812	6.7794	6.49294	6.77617	6.85875	6.68094
Tet3	7.22491	6.85217	7.34112	6.21162	6.87678	6.99674	6.78764	6.63255	6.46427	6.39576	6.4509	6.70752
Itga5	6.9758	6.81927	6.82029	6.36121	6.73455	6.67356	6.74028	6.94115	6.76192	6.6532	6.774	6.67893
Ptk2	6.77074	6.8907	6.81165	6.45585	6.76583	6.81525	6.6378	6.85452	6.7676	6.68196	6.67592	6.79624
Prpf4b	6.86388	6.63069	6.92865	6.58235	6.87418	6.81903	6.86226	6.76354	6.58492	6.68989	6.71504	6.60027
Prkaa1	6.81204	6.72293	6.73775	6.62448	6.67813	6.90332	6.6988	6.73189	6.69029	6.80077	6.81303	6.69695
Trap1	6.73778	6.88999	6.59336	6.80898	6.75028	6.62305	6.64768	6.50975	6.78209	6.86518	6.8764	6.81591
Cep170b	6.95478	6.79239	7.14141	6.06976	6.61316	6.83529	6.88451	6.91267	6.66618	6.49182	6.82399	6.71015
Hbs1l	6.83449	6.78711	6.78099	6.65038	6.70698	6.64735	6.64838	6.75048	6.71064	6.75869	6.69529	6.92355
Npepl1	6.62986	6.88435	6.68076	6.71463	6.65629	6.74812	6.63283	6.88904	6.87217	6.78174	6.80936	6.59103
Cnot9	6.67616	6.85651	6.6778	6.69938	6.86698	6.72235	6.63567	6.61825	6.66792	6.74924	6.75758	6.9555
BC004004	6.67947	6.88364	6.68313	6.93583	6.67139	6.70203	6.7237	6.70815	6.68173	6.82016	6.65766	6.73491
Usp34	7.11919	6.61031	7.08606	6.249	6.93736	6.7782	6.73433	6.76236	6.37677	6.72373	6.6267	6.8722
Prpf38b	6.66785	6.73631	6.7002	6.58867	6.84385	6.89658	6.81483	6.60248	6.79247	6.75932	6.71831	6.75224
Trp53inp2	6.78618	6.42151	7.18889	6.31623	6.88198	6.749	7.02161	6.93172	6.86462	6.58046	6.79086	6.32363
Tapt1	6.59172	6.66402	6.67005	7.02065	6.66763	6.69199	6.80729	6.50481	6.72655	6.88142	6.70322	6.92298
Phf14	6.9265	7.01085	6.76765	6.5768	6.71064	6.79023	6.81483	6.69891	6.90639	6.59319	6.53778	6.51483
Knstrn	6.60918	6.85434	6.53616	7.15019	6.71502	6.79706	6.65189	6.5952	6.83866	6.77493	6.41188	6.90702
Ccar1	6.99053	6.76193	6.86586	6.39225	6.83784	6.83446	6.78316	6.90466	6.60227	6.62178	6.58149	6.65045
Flii	6.75043	6.78332	6.86639	6.33138	6.88975	6.69702	6.76707	7.11603	6.62568	6.59319	6.86052	6.53944
Edf1	6.43017	6.68284	6.50367	7.1656	6.63489	6.67587	6.70016	6.76058	6.87518	6.83572	6.87933	6.67355
Idh1	6.8646	6.77343	7.04426	6.83778	6.88975	6.72638	6.40801	6.62541	6.68087	6.49258	6.59506	6.86809
Tbrg1	6.8841	6.64494	6.50367	6.86211	6.73742	6.49295	6.77417	6.7588	6.63635	7.06731	6.70124	6.74071
Ncapg2	6.9279	6.89702	6.85434	6.39946	6.79989	6.80385	6.69404	6.56569	6.59408	6.65185	6.67727	6.9354
Psip1	6.63839	6.98932	6.67601	6.7851	6.79024	6.77604	6.65679	6.57582	6.82939	6.69055	6.76645	6.62628
Stat6	6.74807	6.68771	6.79256	6.50762	6.78261	6.66891	6.83411	7.0599	6.60589	6.6958	6.895	6.52158
Tmsb4x	5.45983	6.11665	5.77628	7.25968	6.45555	6.43722	7.11816	6.42639	7.17279	7.61261	7.75647	7.19501
Atp13a1	6.66284	6.84638	6.71534	6.20752	6.89297	6.66098	6.76448	6.6865	6.82783	6.6532	6.86584	7.00133
Ranbp2	6.78156	6.67141	6.86743	6.44805	6.75524	6.72459	6.90466	6.56975	6.56363	6.76746	6.78837	6.93989
Pgrmc1	6.74175	6.75344	6.58831	7.02299	6.62949	6.58854	6.67346	6.72523	6.7332	6.81171	6.68864	6.82505
Ndrg1	7.16182	7.08778	6.58133	6.78028	6.46337	6.78637	6.81232	7.31735	6.6531	6.6559	6.25246	6.22774
Tia1	6.84999	6.48256	6.83475	7.06947	6.73023	6.96639	6.64768	6.74391	6.59863	6.9424	6.49347	6.41757
Smg1	6.80751	6.45427	7.05893	6.37041	6.83985	6.81777	6.8192	6.53765	6.43704	6.85347	6.90134	6.87689
Opa1	6.91672	6.76961	6.8262	6.4593	6.87418	6.63406	6.77868	6.81232	6.51914	6.71146	6.58436	6.87748
Agps	6.66033	6.78711	6.81813	6.77683	6.78261	6.65206	6.72836	6.57716	6.51432	6.92348	6.86819	6.66068
Sox6	7.02736	6.58617	7.25451	6.40663	6.90771	7.01917	6.64768	6.91587	6.4093	6.42771	6.51842	6.62488
Kmt2d	6.86968	6.20649	7.14012	6.14672	7.011	7.02682	6.77868	6.6921	6.73981	6.56259	6.68931	6.87807
Fads2	7.06201	6.69579	7.17	6.5568	6.87548	6.82947	6.57927	6.2697	6.44111	6.27012	6.77964	7.21135
Vps29	6.24488	6.49373	6.36143	7.43999	6.73814	6.62401	6.81232	6.46323	6.73899	7.32903	6.70849	6.77252
Letm1	6.69509	6.81705	6.64534	6.32949	6.77494	6.57966	6.68721	6.71244	6.83094	6.77679	6.93318	6.94157
Slc4a2	6.8128	6.73787	6.77211	6.39405	6.79162	6.76433	6.75602	6.67336	6.68344	6.59179	6.7921	6.95272
Eif6	6.70243	6.75885	6.51635	6.84967	6.67289	6.56673	6.55248	6.82878	6.79168	6.94295	6.79272	6.73103
Gmfb	6.71538	6.68284	6.72515	6.70084	6.69152	6.70566	6.83164	6.55071	6.72238	6.82736	6.71111	6.83773
Ctdsp2	7.21297	7.12894	7.06485	6.14779	6.25672	6.89499	6.66931	6.96601	6.63901	6.44342	6.71701	6.55782
Mroh1	6.9445	6.60174	6.98976	5.96193	6.77004	6.85832	6.94184	6.96241	6.68858	6.66464	6.82278	6.47979
Grsf1	6.79154	6.79615	6.81056	6.69646	6.77983	6.66378	6.65679	6.79855	6.53063	6.69842	6.71831	6.72258
Atp9a	6.78387	6.79088	6.81056	6.40035	6.80469	6.69199	6.84887	6.86832	6.71064	6.65927	6.71766	6.57163
Sh3gl1	6.72982	6.74256	6.69552	6.8083	6.83248	6.7138	6.61352	6.62996	6.73734	6.62523	6.8546	6.6695
Kcnab2	6.623	6.55008	6.72227	6.49506	6.99549	6.67263	6.69472	6.93225	6.4949	6.80077	6.80506	6.8509
Pcnx	6.93414	6.61628	7.13146	6.14458	6.73742	6.70612	6.92105	6.85508	6.50949	6.70365	6.69462	6.67893
Asxl1	6.93622	6.84347	6.81381	6.26092	6.73239	6.94772	6.83781	6.64863	6.66183	6.63553	6.5459	6.73103
Nasp	6.59435	6.99849	6.42866	6.77128	6.90324	6.72861	6.43678	6.50622	6.87367	6.65252	6.59719	7.09991
Imp4	6.53894	6.60174	6.50635	6.97616	6.87157	6.60906	6.59832	6.53072	6.58859	6.98757	6.83427	6.94493
Sec61b	6.46415	6.73317	6.42795	7.43606	6.53774	6.73929	6.50281	6.3034	6.90049	6.95287	6.68931	6.89955
Vapb	6.7457	6.82296	6.77711	6.75452	6.73167	6.69702	6.59102	6.5623	6.85931	6.68989	6.76392	6.58531
Ip6k1	6.77616	6.64745	6.89376	6.8854	6.61473	6.72951	6.68516	6.79509	6.55428	6.70951	6.71896	6.56292
Vcl	6.84115	7.12116	6.724	5.84671	6.88587	6.65112	6.98144	6.74092	6.85323	6.72695	6.84686	6.34495
Tlk1	6.76919	6.90122	6.72687	6.49085	6.64027	6.70521	6.90231	6.75999	6.65835	6.81231	6.65289	6.54018
Irak1	6.69754	6.70302	6.77933	6.72255	6.81083	6.78294	6.70827	6.65692	6.72738	6.58613	6.7696	6.61087
Pbdc1	6.57049	6.81111	6.55828	6.80152	6.74458	6.63692	6.56817	6.65755	6.91445	6.84047	6.66242	6.78879
Mad2l1	6.43703	6.83252	6.43852	7.33161	6.76864	6.64593	6.4911	6.38399	6.7505	7.01517	6.65494	6.7863
Max	6.4699	6.74022	6.46148	6.5768	6.69447	6.63692	6.99034	6.76767	6.87217	6.78914	6.99375	6.54314
Adam17	6.79383	6.91235	6.73432	6.42352	6.71575	6.66238	6.58222	6.59984	6.60499	6.52543	6.83125	7.14242
Gtf3c2	6.82331	6.68609	6.85592	6.31432	6.77145	6.81525	6.71634	6.74989	6.64959	6.60372	6.84686	6.68429
Fzd7	6.87041	6.95741	6.74287	6.49338	6.60925	6.7384	6.63141	6.63319	6.44212	6.57191	6.8546	6.97039
Dap3	6.70892	6.72134	6.58514	7.00479	6.68484	6.6497	6.67967	6.6721	6.7098	6.71987	6.62043	6.75607
Bmpr2	6.90687	6.71261	7.02289	6.14886	6.75383	6.7415	6.72703	6.7228	6.54014	6.60582	6.64536	6.98458
Chmp6	6.69099	6.80365	6.62822	7.05186	6.68558	6.64545	6.64627	6.7349	6.73237	6.80746	6.57069	6.51332
Emb	6.71054	6.72134	6.51702	6.73685	6.73742	6.50603	6.64557	6.9254	6.44415	6.65455	6.80076	7.10692
Sft2d2	6.94725	6.56516	6.98497	6.56803	6.51533	6.69428	6.91054	6.81346	6.51721	6.67532	6.80137	6.51332
Cand1	6.85292	6.76731	6.82352	6.36766	6.82979	6.64782	6.63283	6.81403	6.72988	6.61	6.83366	6.59245
Pkd1	6.84999	6.52581	7.01915	6.31908	6.63873	6.82864	6.8372	6.78639	6.61762	6.44888	6.94884	6.68027
Cmtr1	6.52981	6.60002	6.51502	6.4679	6.65249	6.62065	7.0879	6.74211	6.57293	6.97032	7.12705	6.61298
Gga1	6.71861	7.01538	6.74116	6.61522	6.68335	6.78723	6.64627	6.77354	6.75785	6.42455	6.6853	6.64839
Ext2	6.62729	6.85578	6.59462	6.62525	6.53444	6.60079	6.87673	6.64671	6.72071	6.60791	6.89904	6.90702
Jund	7.29348	7.28598	6.72054	6.00509	6.82912	6.40797	6.55022	7.02435	6.95979	6.44029	6.72612	6.25142
Aldoc	7.29078	6.63153	7.37597	6.82713	6.88198	6.82028	6.86408	7.09224	6.5477	6.43086	6.53185	5.19947
Dync1i2	6.68935	6.74645	6.72515	6.60746	6.77004	6.63596	6.64204	6.85397	6.8684	6.66397	6.66784	6.59815
Ap1s1	6.51599	6.82149	6.56921	7.03518	6.67139	6.57321	6.36075	6.78871	6.71736	6.86109	6.60639	6.92977
Lman1	6.9279	6.66895	6.78596	6.53078	6.76231	6.63167	6.68653	6.43828	6.52394	6.66598	6.73454	7.09035
Plekhb2	6.70973	6.70542	6.76877	6.47559	6.72373	6.59345	6.92279	6.79509	6.68773	6.79772	6.87874	6.38337
Mafg	6.64264	6.71341	6.80948	6.51428	6.66687	6.91003	6.77675	6.57178	6.9605	6.51803	6.63295	6.72128
Skap2	6.71458	6.58878	6.66766	7.02997	6.66612	6.60371	6.67898	6.85064	6.55522	6.79588	6.65426	6.62975
Pigs	6.74728	6.82959	6.76318	6.54872	6.72663	6.60322	6.5954	6.68338	6.70135	6.52838	6.85163	6.85448
Pigq	6.59348	6.85434	6.7107	6.77128	6.73599	6.70883	6.55623	6.6071	6.79168	6.53499	6.65562	6.89839
Ndufv1	6.76218	6.6541	6.65805	6.89563	6.71356	6.58805	6.63212	6.78871	6.7182	6.79527	6.67794	6.52831
Snrpa	6.69917	6.95539	6.58957	6.66541	6.77494	6.7111	6.57114	6.71976	6.76273	6.49861	6.6986	6.74713
Capg	6.4936	6.36487	6.51302	7.00774	6.68409	6.46482	6.82107	7.05073	6.70474	7.09094	6.6563	6.52607
Taf10	6.63072	6.8637	6.57241	7.08408	6.73957	6.48134	6.47057	6.36075	6.75785	6.75492	6.80076	6.85388
[truncated: 11,377 more rows]

## Sheet: SMAC_vs_Vehicle
	log2FC	baseMean	stat	pvalue	padj	Human
mt-Co1	0.095373	220606	0.793345	0.427577	0.778895	COX1
Eef1a1	0.155406	224018	1.15303	0.248899	0.660539	EEF1A1
Gapdh	-0.111816	224474	-1.08131	0.279558	0.683675	GAPDH
Dct	0.0414822	149715	0.348634	0.727364	0.923918	DCT
Eno1	-0.089193	140523	-0.885938	0.375651	0.746571	ENO1
Tyrp1	0.142083	114324	1.07152	0.283937	0.68616	TYRP1
Pkm	-0.100658	108894	-0.993328	0.32055	0.710093	PKM
Ftl1	0.134548	95990.3	1.08215	0.279187	0.683136	FTL
Gpnmb	0.0793199	83339.1	0.756068	0.449608	0.793199	GPNMB
mt-Cytb	0.25642	85069.6	2.24204	0.0249587	0.284529	CYTB
Pgk1	0.00600334	84303.7	0.053336	0.957464	0.989045	PGK1
Aldoa	0.0129921	79709.5	0.126556	0.899292	0.975929	ALDOA
Pmel	0.0640214	67488.1	0.485365	0.627417	0.881102	PMEL
Actg1	-0.17867	69334.9	-1.53571	0.124609	0.533801	ACTG1
Hsp90ab1	-0.0396444	67116	-0.392532	0.694665	0.911253	HSP90AB1
Atp1a1	-0.306462	68768	-2.61685	0.00887453	0.167162	ATP1A1
Eef2	-0.260361	67896.9	-2.16836	0.0301315	0.310929	EEF2
Hspa8	0.281724	57386.5	2.33924	0.0193231	0.250888	HSPA8
Ldha	0.0340367	65381.2	0.299948	0.764216	0.935066	LDHA
Ppia	0.230373	57278.8	1.768	0.0770613	0.453126	PPIA
Actb	0.0917333	55600.8	0.713553	0.475504	0.805927	ACTB
mt-Nd1	0.188875	56644.3	1.60163	0.109238	0.511652	ND1
Tpi1	0.0520451	55022.5	0.467976	0.639802	0.886029	TPI1
mt-Nd4	0.202042	49906.7	1.6581	0.0972963	0.4918	ND4
Ptma	0.146883	44962.5	1.25375	0.209932	0.629652	PTMA
Rplp0	0.253126	44048.9	1.80357	0.0712984	0.439702	RPLP0
Scd2	-0.339635	48446.6	-2.50255	0.0123301	0.202059	SCD
Tuba1b	0.201273	41806.6	1.52343	0.127651	0.540074	TUBA1B
Hsp90aa1	0.000882328	37193.9	0.00740154	0.994094	0.998359	HSP90AA1
Rpsa	0.187492	39711.3	1.37837	0.168088	0.587479	RPSA
Vim	0.158642	34727.2	1.40383	0.16037	0.579027	VIM
Rps2	0.196306	37991.9	1.49671	0.134468	0.546761	RPS2
mt-Nd5	0.126872	38233.1	0.991391	0.321495	0.710586	ND5
Atp5b	-0.0180733	35343.1	-0.168073	0.866525	0.965162	ATP5F1B
mt-Co3	0.275707	34198.9	2.36634	0.0179652	0.243561	COX3
Met	-0.0348863	32601.1	-0.289163	0.772457	0.937378	MET
Rpl4	-0.131485	35775.9	-1.35919	0.174087	0.593649	RPL4
Gpi1	-0.199516	35114	-1.75022	0.0800798	0.458842	GPI
mt-Co2	0.197536	36947.3	1.52003	0.128502	0.540822	COX2
Pgam1	0.0710205	34450.8	0.620028	0.53524	0.83838	PGAM1
Rack1	0.234018	32680.7	1.68234	0.0925031	0.482769	GNB2L1
Fth1	0.0370392	30331.9	0.306954	0.758879	0.933818	FTH1
Ctnnb1	-0.257016	31240.7	-2.23386	0.0254922	0.286192	CTNNB1
Rps3a1	0.138318	29863.8	1.07489	0.282424	0.685519	RPS3A
Ubb	0.100767	28461.3	0.980861	0.326662	0.713634	UBB
Rpl8	0.175659	29089.3	1.42986	0.152756	0.573291	RPL8
Tubb5	0.021399	28054.8	0.187016	0.851648	0.961607	TUBB
Hsp90b1	-0.0364653	26092.1	-0.350391	0.726045	0.923494	HSP90B1
Rpl3	0.0677363	27014.4	0.55509	0.578833	0.860472	RPL3
Rpl13a	0.52746	27850.2	3.82157	0.000132606	0.0106004	RPL13A
Pabpc1	-0.127939	26389.8	-1.17786	0.238852	0.65155	PABPC1
P4hb	0.0664635	27116.9	0.522907	0.601039	0.869032	P4HB
Hspd1	-0.0308917	24709.2	-0.265144	0.790898	0.943379	HSPD1
Tpt1	0.136739	25144	1.12116	0.26222	0.670845	TPT1
Rpl6	0.0898252	25117	0.770784	0.440835	0.788667	RPL6
Rplp1	0.138309	25187.6	1.18115	0.237542	0.650337	RPLP1
Hnrnpab	-0.0538351	26117	-0.455451	0.648784	0.888925	HNRNPAB
Gnas	-0.120142	26327.7	-1.26283	0.20665	0.625967	GNAS
Npm1	0.0371175	24993.9	0.328798	0.742309	0.928998	NPM1
Rpl19	0.294476	25460.2	2.09832	0.0358772	0.335595	RPL19
Eif4g2	-0.0763534	24901.4	-0.774182	0.438823	0.787356	EIF4G2
Nedd4	-0.138542	25889.6	-1.21426	0.224647	0.639438	NEDD4
Rps6	0.206075	24436.2	1.61235	0.106885	0.505338	RPS6
Rps3	0.339452	24672.2	2.45604	0.0140477	0.213613	RPS3
Hnrnpa2b1	0.0386315	24212.3	0.380317	0.70371	0.913743	HNRNPA2B1
Rpl7a	0.245868	24242.2	1.90759	0.0564439	0.40129	RPL7A
Hspa5	-0.0145587	22982.7	-0.131287	0.895548	0.974884	HSPA5
Rps7	0.167286	24666.2	1.28378	0.19922	0.617879	RPS7
Bsg	0.0632576	24409.1	0.534856	0.592749	0.865257	BSG
Eif5a	0.221682	23469.1	1.7336	0.0829888	0.464248	EIF5A
Hnrnpa3	-0.0872283	23764.5	-0.720163	0.471425	0.803691	HNRNPA3
Rpl13	0.0855733	23170.5	0.725958	0.467864	0.80142	RPL13
mt-Atp6	0.193547	22769.5	1.432	0.152143	0.572665	ATP6
Rps4x	0.0790575	23191.7	0.67446	0.500019	0.821489	RPS4Y1
Ywhae	0.108751	22399.4	0.887993	0.374545	0.746294	YWHAE
Ncl	-0.0833219	22074.7	-0.621912	0.534	0.837709	NCL
Rpl32	0.339742	22598.5	2.5608	0.0104431	0.184763	RPL32
Cfl1	0.106862	21688.4	0.98793	0.323187	0.711905	CFL1
Eps8	0.103854	20487.6	0.882417	0.377551	0.747237	EPS8
Rpl7	0.130231	21655.6	1.0422	0.297319	0.694922	RPL7
Syt4	-0.164375	22831.8	-1.62478	0.10421	0.500247	SYT4
Ddx5	-0.150061	22242.3	-1.29601	0.194973	0.612267	DDX5
mt-Nd2	0.241315	22852.7	2.17739	0.0294513	0.306416	ND2
Ctsd	0.207161	19265.6	1.71682	0.0860126	0.471218	CTSD
Atp5a1	-0.0456676	20901.4	-0.45381	0.649966	0.889877	ATP5F1A
Arhgdia	0.0103542	20937.6	0.0920695	0.926643	0.98303	ARHGDIA
Eif4a1	-0.00877341	20683.5	-0.0820364	0.934618	0.98334	EIF4A1
Rpl12	0.295539	19976.5	2.11534	0.0344008	0.327398	RPL12
Calr	0.278356	19049.2	2.51047	0.0120569	0.20038	CALR
Canx	-0.0395669	20123.6	-0.399928	0.68921	0.908348	CANX
Rcc2	-0.129887	20875.4	-1.07795	0.281058	0.68501	RCC2
Slc45a2	-0.0539842	19184	-0.467478	0.640158	0.886043	SLC45A2
Prdx1	0.205027	19144.6	1.47578	0.140004	0.553177	PRDX1
Serbp1	-0.0438819	19836.8	-0.387255	0.698568	0.911869	SERBP1
Ybx1	0.0842416	19464.6	0.754704	0.450427	0.79328	YBX1
Sqstm1	-0.271457	20019.5	-2.54755	0.0108481	0.188162	SQSTM1
Psap	0.0323305	15869.7	0.31886	0.749833	0.929945	PSAP
Tyr	0.0487148	19092.3	0.430744	0.666654	0.896277	TYR
Eif4g1	-0.0356115	17913.8	-0.276098	0.782473	0.940141	EIF4G1
Ran	0.304087	18467.3	2.27923	0.0226534	0.270251	RAN
Slc25a5	0.0513066	18069.5	0.500668	0.616605	0.877198	SLC25A5
Rpl10	0.13481	18038.5	1.17311	0.240753	0.654241	RPL10
Atp6v0c	0.0487963	17646.7	0.439971	0.659958	0.893284	ATP6V0C
Rpl27	0.372638	18237.5	2.74155	0.00611503	0.136109	RPL27
Akt1	0.0934776	17992.2	0.844463	0.398411	0.762153	AKT1
Mif	0.131732	18329.2	1.17033	0.24187	0.654881	MIF
Apoe	0.110777	16499	0.953699	0.340236	0.724883	APOE
Rps18	0.392385	18230.4	2.91026	0.00361129	0.0984284	RPS18
Rps9	0.26569	17812.2	1.99977	0.0455247	0.369165	RPS9
Rpl10a	0.318359	17423.8	2.47665	0.0132621	0.208668	RPL10A
Hnrnpf	-0.128737	17159.7	-1.11658	0.264172	0.672789	HNRNPF
Rpl15	0.30471	16891.4	2.29245	0.0218794	0.265743	RPL15
Rpl29	0.127626	16673.2	1.15628	0.247568	0.659372	RPL29
Serpinh1	0.0971319	17290.5	0.771459	0.440435	0.788639	SERPINH1
Hnrnpk	-0.102815	16633.6	-0.995802	0.319347	0.709599	HNRNPK
Rbm3	0.202688	16427.5	1.64189	0.100613	0.495829	RBM3
Cct7	-0.0397722	16057.4	-0.343041	0.731567	0.925418	CCT7
Hnrnpa1	-0.1059	16760.8	-0.946691	0.343796	0.727399	HNRNPA1
Vdac1	-0.00215556	16427.9	-0.0205999	0.983565	0.995847	VDAC1
Oxct1	0.00746001	15286.5	0.0658959	0.947461	0.986478	OXCT1
Pfn1	0.12465	15850.7	1.10813	0.267804	0.676476	PFN1
Hnrnpu	-0.0965722	16073.7	-0.753159	0.451354	0.793471	HNRNPU
H3f3b	-0.189168	16865.4	-1.70101	0.0889415	0.476901	H3-3A
Sdcbp	0.00168191	14663	0.0139544	0.988866	0.997541	SDCBP
Rpl18a	0.138659	15528.9	1.0452	0.295932	0.693633	RPL18A
Ero1l	-0.456519	18710.2	-3.43866	0.000584591	0.0296922	ERO1A
Rps15	0.273905	15804.2	2.03962	0.0413884	0.352339	RPS15
Slc25a4	-0.148436	15683.7	-1.52304	0.127749	0.540074	SLC25A4
Fkbp4	0.104548	15392.6	0.821775	0.411205	0.770569	FKBP4
Rps12	0.385964	14752.5	2.79264	0.00522799	0.125991	RPS12
Rps10	0.321764	15935	2.27991	0.0226128	0.270241	RPS10
Pdia3	0.0961694	14207.5	0.801281	0.422969	0.776737	PDIA3
Eef1b2	0.184215	15486.8	1.38394	0.166376	0.585084	EEF1B2
Rps14	0.236413	16056.8	1.95805	0.0502241	0.384328	RPS14
Rps24	0.470306	14909.7	3.31424	0.000918926	0.0408377	RPS24
Csrp1	0.123919	14970.6	0.981709	0.326243	0.713555	CSRP1
Prrc2a	-0.121049	15114.9	-0.90967	0.362996	0.739876	PRRC2A
Ubc	-0.214759	15477.6	-1.6885	0.0913153	0.480202	UBC
Rpl18	0.240737	15012.9	2.00519	0.0449427	0.367331	RPL18
Rpn1	-0.0649965	14926.5	-0.570443	0.568377	0.857405	RPN1
Slc25a3	-0.0671836	14241.1	-0.700982	0.483314	0.811508	SLC25A3
Caprin1	0.00178959	14530.3	0.0173913	0.986124	0.996645	CAPRIN1
Vat1	-0.0156645	13892.8	-0.142105	0.886997	0.972366	VAT1
Eef1g	0.0918245	14423.4	0.757524	0.448736	0.793199	EEF1G
Rpl27a	0.218602	14492.1	1.63146	0.102794	0.497077	RPL27A
Rpl21	0.220703	14373.2	1.90882	0.0562859	0.400916	RPL21
Mitf	-0.312042	14609.1	-2.45777	0.0139801	0.213613	MITF
Rps26	0.280246	14847.3	2.01278	0.0441376	0.364697	RPS26
Tuba1a	0.239432	15425.3	1.75502	0.0792565	0.457934	TUBA1A
Gnb1	-0.0669376	14523.4	-0.676746	0.498567	0.82066	GNB1
Calu	-0.191131	15133.7	-1.77575	0.0757741	0.451135	CALU
Rps8	0.234014	14035.2	1.7927	0.0730212	0.444226	RPS8
Plxna1	-0.118989	13794.1	-0.965169	0.33446	0.720415	PLXNA1
Tecpr1	-0.264119	15166.5	-2.01568	0.0438339	0.363313	TECPR1
Calm1	0.194785	13433.8	1.61578	0.106143	0.504562	CALM1
Pcbp1	-0.010287	13811.9	-0.0914689	0.92712	0.983062	PCBP1
Ctsb	0.308523	10974.9	2.63155	0.00849965	0.163354	CTSB
Rps25	0.426536	14021.9	3.06456	0.00217992	0.0725349	RPS25
Cnbp	0.11918	13368.6	0.951881	0.341158	0.724961	CNBP
Rps16	0.329557	13513	2.70529	0.00682451	0.144538	RPS16
Rps5	0.155495	13732.1	1.18022	0.237915	0.650704	RPS5
B2m	0.654278	8346.74	4.73212	2.22186e-06	0.000428362	B2M
Rpl26	0.262163	13199.6	1.90966	0.0561772	0.40048	RPL26
Cd63	0.254221	12281	1.90286	0.0570586	0.404126	CD63
Ugp2	0.0912286	13798.4	0.667154	0.504674	0.822963	UGP2
Cltc	-0.240751	13520.7	-1.91795	0.0551178	0.397248	CLTC
Rpl23	0.00546986	13620.4	0.0533473	0.957455	0.989045	RPL23
Rpl9	0.469673	13661.9	3.31566	0.000914286	0.0407697	RPL9
Itgb1	-0.16009	13389.1	-1.53909	0.123783	0.53209	ITGB1
Rpl28	0.132664	13158.1	1.18836	0.23469	0.64886	RPL28
Ptgds	0.0812757	12025.5	0.768586	0.442139	0.789276	PTGDS
Lgals1	0.234055	12428.7	1.95846	0.0501763	0.384236	LGALS1
5031439G07Rik	0.183523	11766.1	1.55773	0.119298	0.525854	KIAA0930
Gstp1	0.199423	12485.3	1.77433	0.0760085	0.451505	GSTP1
Car6	0.253264	13743.4	2.00775	0.0446701	0.366552	CA6
Sparc	0.211114	12344.1	1.7852	0.0742287	0.447009	SPARC
Rpl36	0.3701	13366.8	2.68464	0.00726078	0.149433	RPL36
Hmga1	0.168195	11686.6	1.47973	0.138946	0.552392	HMGA1
Rpl14	0.182855	12233.9	1.73585	0.082591	0.463518	RPL14
Rps11	0.4267	12455	3.24867	0.00115944	0.0470596	RPS11
Tmbim6	-0.0515091	11860.8	-0.512325	0.608424	0.87324	TMBIM6
H2az1	0.215761	12471.4	1.69935	0.0892538	0.477404	H2AFZ
Rpl31	0.128265	12069.7	1.08352	0.278576	0.683136	RPL31
Sox10	-0.239273	13024.6	-1.92025	0.0548262	0.396537	SOX10
Rps27a	0.158678	11873.3	1.30075	0.193344	0.609153	RPS27A
Sec61a1	-0.111104	12528.4	-1.1382	0.255036	0.666173	SEC61A1
Lamp1	0.0122883	11753	0.113211	0.909863	0.979481	LAMP1
H3f3a	0.140325	12067.1	1.09817	0.272131	0.679133	H3-3A
Set	0.0385386	11579.1	0.323903	0.746012	0.929413	SET
Vcp	-0.10285	11411.8	-0.816121	0.414431	0.771953	VCP
Cdk2	0.248293	11317.3	2.12752	0.0333768	0.325572	CDK2
Sort1	-0.243373	12629.9	-2.19686	0.0280305	0.300418	SORT1
Flna	-0.115294	11634	-0.907843	0.363961	0.740595	FLNA
Pfkl	-0.179025	12652.4	-1.50709	0.131789	0.544312	PFKL
Rps23	0.16985	12157.3	1.49263	0.135535	0.546903	RPS23
Pcbp2	-0.0801879	11927.7	-0.762749	0.445613	0.791811	PCBP2
Cd44	0.148594	10921.1	1.32546	0.18502	0.604271	CD44
Rpl11	0.227205	12167.6	1.71318	0.0866796	0.472147	RPL11
Atp2a2	-0.151639	11234.7	-1.19833	0.23079	0.646923	ATP2A2
Mlana	0.200892	10830	1.48692	0.137035	0.549565	MLANA
Fam120a	-0.0182651	10917.8	-0.156278	0.875814	0.968521	FAM120A
Ywhaz	0.00913689	11155.2	0.0826766	0.934109	0.98334	YWHAZ
Myo5a	0.0380994	11002.9	0.325226	0.74501	0.929401	MYO5A
Ptbp1	-0.0635358	11555.4	-0.567595	0.57031	0.857975	PTBP1
Rpl35	0.459075	11289.7	3.38466	0.000712672	0.034099	RPL35
Rps17	0.159253	11515.3	1.42371	0.154529	0.574741	RPS17
Tpm3	0.131158	11122.5	1.21678	0.223687	0.638585	TPM3
Hspa9	-0.35968	11614.1	-3.15817	0.00158764	0.0583022	HSPA9
Trpm1	0.104743	10928	0.730413	0.465138	0.799836	TRPM1
Rpl17	0.549801	11318.8	3.89522	9.81092e-05	0.00851795	RPL17
Pakap	-0.0882392	10732.4	-0.703315	0.481859	0.81051	PALM2AKAP2
Ssr3	0.0560108	11590.7	0.48474	0.62786	0.881102	SSR3
Hdlbp	-0.198225	11769.4	-1.6682	0.0952753	0.487152	HDLBP
Prkar1a	-0.0462575	11077.7	-0.462321	0.643851	0.887335	PRKAR1A
Rps15a	0.356675	10917.6	2.5916	0.00955305	0.175223	RPS15A
Kpnb1	-0.0545473	10871.4	-0.445447	0.655997	0.891989	KPNB1
Nckap5l	0.0111298	10739.8	0.0898889	0.928375	0.983062	NCKAP5L
Fasn	-0.184717	11490.4	-1.30845	0.190721	0.608556	FASN
Aco2	-0.132915	11144.1	-1.36235	0.173087	0.592518	ACO2
Chd4	-0.162999	11122.2	-1.21508	0.224337	0.639221	CHD4
Naca	0.250408	10858	1.83524	0.06647	0.428262	NACA
Sptan1	-0.0978583	10577.2	-0.736947	0.461155	0.797275	SPTAN1
Rab7	-0.0108595	10478.6	-0.112024	0.910804	0.979501	RAB7A
Akr1a1	0.0273842	10972.6	0.217414	0.827886	0.956729	AKR1A1
Sf3b1	-0.193953	11165.4	-1.80265	0.0714428	0.439726	SF3B1
Gars	-0.339007	11466.3	-2.94827	0.00319561	0.0914727	GARS
Eif3a	-0.143965	10744.2	-1.11154	0.266335	0.675238	EIF3A
Tfrc	-0.0323259	11168	-0.298807	0.765088	0.935066	TFRC
Fkbp9	-0.054313	11102.8	-0.537114	0.591189	0.865257	FKBP9
Rps19	0.277047	10665	2.19266	0.028332	0.301487	RPS19
Ybx3	-0.00446583	11057.3	-0.0351416	0.971967	0.992981	YBX3
Arf1	-0.0113097	10476.3	-0.11069	0.911862	0.979501	ARF1
Rpl5	0.307233	10843	2.30402	0.0212217	0.262964	RPL5
Ywhaq	0.145757	10347.9	1.23878	0.215428	0.631583	YWHAQ
Slc24a5	0.151339	9815.81	1.18128	0.237491	0.650337	SLC24A5
Cox4i1	0.271484	10204.6	2.04794	0.0405659	0.35025	COX4I1
Acly	-0.250175	11242.6	-2.03577	0.0417732	0.354321	ACLY
Eif4b	-0.246018	10976.3	-2.22037	0.0263937	0.290486	EIF4B
Lmna	-0.0192238	9764.09	-0.151605	0.879498	0.969089	LMNA
Hdgf	-0.0131327	10225.2	-0.121969	0.902924	0.977143	HDGF
Bnip3	0.0614476	12006.6	0.449074	0.653378	0.891432	BNIP3
Lbh	-0.0867313	10869.1	-0.801066	0.423093	0.776783	LBH
Cpe	-0.102818	9677.57	-0.910102	0.362769	0.739586	CPE
Ccnd2	-0.241297	10927.7	-1.84928	0.0644181	0.424312	CCND2
Atp13a2	-0.0563229	9662.18	-0.474679	0.635016	0.883576	ATP13A2
Dst	-0.0364618	10020.9	-0.260908	0.794163	0.945203	DST
Hspa4	-0.065525	9539.31	-0.557918	0.576901	0.860331	HSPA4
Got2	-0.0420177	9684.53	-0.386266	0.6993	0.911981	GOT2
Ptprs	0.0298816	9734.74	0.240825	0.809691	0.949971	PTPRS
Btf3	0.216751	9861.44	1.58593	0.112756	0.517378	BTF3
Bzw1	0.0561269	9760.32	0.524933	0.59963	0.868572	BZW1
Dync1h1	-0.119936	9113.8	-0.862043	0.388664	0.756149	DYNC1H1
Mgat4b	0.0328116	9108.64	0.272231	0.785445	0.940914	MGAT4B
Anp32b	-0.0526973	9929.81	-0.437056	0.662071	0.894237	ANP32B
Eif5	0.0824225	9627.87	0.778724	0.436142	0.786057	EIF5
Pdia6	0.00132072	9370.32	0.0115039	0.990821	0.997824	PDIA6
Rplp2	0.238362	9554.05	2.00574	0.0448844	0.367083	RPLP2
Eif4h	-0.0515054	9671.31	-0.477042	0.633332	0.882545	EIF4H
Tcp1	0.102861	9527.75	0.951597	0.341301	0.724961	TCP1
Phb2	0.190886	9305.27	1.64197	0.100597	0.495829	PHB2
Rac1	-0.115405	9924.23	-1.12212	0.261812	0.670529	RAC1
Fbln5	-0.149024	9406.47	-1.25401	0.209837	0.629512	FBLN5
Eif3c	-0.272945	9848.65	-2.37135	0.0177231	0.242537	EIF3C
Ctsz	0.107796	9109.78	1.06506	0.286849	0.687833	CTSZ
Actn4	-0.0304518	8943.83	-0.240451	0.80998	0.949971	ACTN4
Mdh2	0.00277464	9343.8	0.0270265	0.978439	0.994829	MDH2
Cct5	0.140394	9284.09	1.12538	0.260429	0.670019	CCT5
Eif1	-0.140407	10162.2	-1.18274	0.236912	0.650337	EIF1
Ago2	-0.109208	9038.56	-0.872563	0.382901	0.751024	AGO2
Odc1	0.0593364	9450.78	0.443674	0.657278	0.892084	ODC1
Cct8	-0.0181926	9172.13	-0.168276	0.866366	0.965162	CCT8
Prelid1	-0.0317497	9813.61	-0.269226	0.787756	0.941688	PRELID1
Myh9	-0.0984268	8882.19	-0.712675	0.476047	0.806119	MYH9
Top2a	-0.108925	9619.52	-0.983526	0.325348	0.713454	TOP2A
Slc7a5	-0.380537	9307	-2.91866	0.0035154	0.0970251	SLC7A5
H2-D1	0.667885	5362.32	4.85	1.23461e-06	0.000269762	HLA-A
Srsf2	0.11227	9042.82	1.03359	0.30133	0.697451	SRSF2
Eif3b	-0.0462944	9100.13	-0.36641	0.714059	0.917856	EIF3B
Ddx3x	-0.217744	9644.76	-1.76011	0.0783894	0.45513	DDX3X
H1f0	-0.126918	10617.1	-0.97304	0.330534	0.716773	H1F0
Cct2	-0.0189737	9117.24	-0.181868	0.855686	0.963503	CCT2
Rps20	0.109601	9116.48	0.9847	0.324771	0.713191	RPS20
Mrfap1	-0.0619017	8930.79	-0.543312	0.586915	0.863603	MRFAP1
Cct3	0.234654	9012.11	1.83813	0.0660437	0.427459	CCT3
Ddb1	-0.0785085	9132.65	-0.76515	0.444182	0.79077	DDB1
Plxnb2	-0.273662	9668.49	-2.15512	0.0311521	0.317062	PLXNB2
Rpl24	0.297466	8979.95	2.29716	0.0216095	0.265073	RPL24
Slc38a1	-0.0883813	8988.11	-0.740825	0.458799	0.796385	SLC38A1
Ppp1cc	0.0889466	9358.84	0.726026	0.467823	0.80142	PPP1CC
Rpl30	0.0310191	9126.35	0.309514	0.75693	0.933013	RPL30
Hnrnpa0	-0.270149	9708.67	-2.00817	0.0446249	0.366552	HNRNPA0
G3bp1	0.0163837	8754.31	0.156183	0.875889	0.968521	G3BP1
Srsf1	0.0819915	9004.48	0.769513	0.441589	0.789261	SRSF1
Ppp2ca	-0.00886721	9073.85	-0.0804247	0.935899	0.98334	PPP2CA
2020-09-09	0.0147383	8737.49	0.126591	0.899264	0.975929	2020-09-09
Mlf2	0.0218212	8876.95	0.203394	0.838827	0.959282	MLF2
Actr3	-0.0232043	8315.34	-0.192782	0.84713	0.960305	ACTR3
Tpm1	0.208714	8063.29	1.57874	0.114396	0.519956	TPM1
Chchd2	0.136159	8689.19	1.06707	0.285941	0.68716	CHCHD2
Aebp1	-0.0255948	8426.57	-0.207757	0.835419	0.958596	AEBP1
Dag1	-0.226046	9445.13	-1.69997	0.0891369	0.477168	DAG1
Mlph	0.350693	7570.51	3.22366	0.00126563	0.0498269	MLPH
Mcm2	0.0345767	8528.09	0.283698	0.776642	0.938137	MCM2
Mknk2	0.0980789	8075.26	0.856075	0.391956	0.758304	MKNK2
Maged1	-0.20627	9325.58	-1.98498	0.0471472	0.373809	MAGED1
Uba1	-0.040544	8208.22	-0.343336	0.731346	0.925418	UBA1
Chchd10	-0.133835	8278.41	-1.23854	0.215517	0.631583	CHCHD10
Pdia4	0.109136	8079.2	1.06817	0.285443	0.68716	PDIA4
Nono	-0.0226274	8557.84	-0.202777	0.839309	0.959338	NONO
Atp5g3	0.109994	8263.15	1.05614	0.290906	0.68918	ATP5MC3
Plxnd1	-0.0849022	8511.67	-0.634285	0.525895	0.835574	PLXND1
Ets1	-0.151944	8914.33	-1.32299	0.185839	0.604554	ETS1
Nckap1	-0.182694	8348.77	-1.68001	0.0929553	0.483973	NCKAP1
Hnrnpl	0.0656376	8490.79	0.599906	0.548569	0.845986	HNRNPL
Srrm2	0.0240954	8488.56	0.180442	0.856805	0.963503	SRRM2
Rpl34	0.487476	7978.43	3.49148	0.000480348	0.026239	RPL34
Msn	-0.15051	7944.84	-1.34975	0.177097	0.596103	MSN
Nucks1	-0.14215	8482.75	-1.26578	0.20559	0.625628	NUCKS1
Ckb	-0.0320892	9005.25	-0.290229	0.771641	0.937378	CKB
Sparcl1	-0.0153526	7830.61	-0.121896	0.902981	0.977143	SPARCL1
Wdr1	-0.0767715	7916.32	-0.653149	0.51366	0.82769	WDR1
Kpna2	0.102487	8522.75	0.849942	0.395357	0.759656	KPNA2
Rpl35a	0.371895	8206.69	2.79295	0.00522297	0.125991	RPL35A
Mprip	-0.116655	8523.86	-1.13514	0.256316	0.667616	MPRIP
Prpf8	-0.16625	8281.19	-1.2499	0.211338	0.630017	PRPF8
Pebp1	0.100376	8353.62	0.825323	0.409188	0.76951	PEBP1
Gpx1	0.434782	7399.89	3.09184	0.00198922	0.0688884	GPX1
Tmpo	-0.0966994	8412.04	-0.907987	0.363885	0.740595	TMPO
Aars	-0.386499	8671.6	-3.20093	0.00136984	0.0517541	AARS
Srsf3	0.278073	8162.76	2.22493	0.0260861	0.289328	SRSF3
Mtpn	-0.138138	8180.48	-1.40578	0.15979	0.578717	MTPN
Tomm20	0.29354	7971.12	2.21293	0.0269028	0.29318	TOMM20
Rps13	0.223561	7511.41	1.81056	0.0702093	0.437184	RPS13
Bhlhe40	-0.0532435	7905.25	-0.422115	0.672941	0.899873	BHLHE40
Laptm4a	0.167747	7463.08	1.32223	0.186091	0.604623	LAPTM4A
Fau	0.261686	7894.57	1.94865	0.051337	0.387137	FAU
Tkt	-0.121436	8253.97	-1.12452	0.260792	0.670077	TKT
Hif1a	-0.191914	8276.2	-1.62359	0.104463	0.500447	HIF1A
H2-K1	0.419403	4835.09	3.07679	0.00209243	0.0711162	HLA-A
Tubb4b	0.130926	7936.54	1.12621	0.260077	0.670016	TUBB4B
Ube2s	0.0730684	8168.19	0.642566	0.520506	0.832734	UBE2S
Mgat5	0.1138	6719.23	0.837807	0.402139	0.764507	MGAT5
Tmed2	0.0174262	7628.11	0.164533	0.869311	0.966381	TMED2
Selenof	0.206144	8618.95	1.69891	0.0893359	0.477511	SELENOF
Copg1	-0.124411	8054.66	-1.0242	0.305739	0.700136	COPG1
Hnrnpm	-0.10485	7764.94	-0.820848	0.411733	0.770671	HNRNPM
Ube2d3	0.22905	7663.05	1.7899	0.0734702	0.444483	UBE2D3
Sfpq	0.0395642	7673.81	0.325525	0.744784	0.929343	SFPQ
Fdps	-0.106976	8076.73	-1.09183	0.274907	0.681728	FDPS
Atp5c1	0.220904	7624.45	1.72053	0.0853365	0.470661	ATP5F1C
Oaz1	0.291853	7922.36	2.14323	0.0320946	0.32035	OAZ1
Pgm1	-0.215647	8466.26	-1.89886	0.0575831	0.405819	PGM1
Atf4	-0.368866	8773.14	-2.73833	0.00617519	0.136751	ATF4
Fus	-0.0954166	8280.57	-0.732921	0.463607	0.798789	FUS
Nap1l1	0.0724516	7521.23	0.581449	0.560938	0.853203	NAP1L1
Anapc5	-0.0936849	7894.97	-0.859452	0.390091	0.75725	ANAPC5
Ddx17	-0.0419869	7837.15	-0.33956	0.734188	0.926259	DDX17
Calm2	0.125591	7714.08	1.04807	0.294607	0.693176	CALM2
Sdhb	0.161143	7320.55	1.3402	0.18018	0.598533	SDHB
Gtf2i	-0.102741	7638.57	-0.889173	0.37391	0.746232	GTF2I
Nme2	0.42064	7504.39	3.00077	0.00269299	0.0830942	NME2
Ogdh	0.0740151	7347.72	0.597152	0.550406	0.847415	OGDH
Aplp2	-0.166247	7840.73	-1.42112	0.155281	0.575067	APLP2
Hnrnph1	0.130493	7573.97	1.18066	0.237739	0.650647	HNRNPH1
Rpl37	0.198256	7986.3	1.79043	0.0733856	0.444407	RPL37
Cycs	0.269921	7211.75	2.12274	0.0337753	0.326336	CYCS
Hk1	-0.150538	7690.54	-1.1312	0.257973	0.668119	HK1
Spg21	-0.00784934	7855.47	-0.0637925	0.949135	0.987161	SPG21
Ewsr1	-0.146256	7782.17	-1.15691	0.247309	0.659372	EWSR1
Morf4l1	0.0709131	7475.64	0.625817	0.531435	0.837655	MORF4L1
Hmgn1	-0.0133017	7737.42	-0.119574	0.90482	0.977562	HMGN1
Dbi	0.308433	7512.77	2.41292	0.0158253	0.226198	DBI
Anxa2	0.0600192	7105.54	0.534719	0.592844	0.865257	ANXA2
Pfkp	-0.142813	7267.68	-1.16066	0.245782	0.65813	PFKP
Cbx3	0.0318588	7361.55	0.28895	0.77262	0.937378	CBX3
Cdc42bpb	-0.273104	7788.94	-2.07375	0.0381023	0.342157	CDC42BPB
Srebf2	-0.342909	8201.56	-2.87479	0.00404294	0.105464	SREBF2
Rpn2	-0.101186	7281.12	-0.977032	0.328553	0.71491	RPN2
Tln1	-0.159358	7129.59	-1.15754	0.247052	0.659372	TLN1
Rrm2	0.0263455	7161.57	0.243398	0.807697	0.949727	RRM2
Cct6a	0.172509	7057.48	1.48305	0.138061	0.550438	CCT6A
Ppp1ca	0.266457	7493.39	1.94008	0.0523703	0.388062	PPP1CA
Cox5b	0.228475	7297.52	2.08585	0.0369921	0.338487	COX5B
Csde1	2.25722e-05	7115.74	0.000213709	0.999829	0.999906	CSDE1
Tmed10	0.00999619	7117.27	0.0970123	0.922717	0.982089	TMED10
Arhgdib	0.264828	6872.76	2.02714	0.0426486	0.358338	ARHGDIB
Psmd2	-0.0994179	7058.14	-0.942047	0.346168	0.730325	PSMD2
Eif3h	0.278044	7639.77	1.99418	0.0461325	0.371074	EIF3H
Hint1	0.453037	7158.61	3.30333	0.000955451	0.0417532	HINT1
Tspan10	0.201168	6686.47	1.6348	0.102091	0.496422	TSPAN10
Idh2	0.00669312	7280.51	0.0627662	0.949953	0.987255	IDH2
Syne2	-0.0231393	6711.96	-0.170083	0.864945	0.96498	SYNE2
Scpep1	-0.0340891	6586.65	-0.347498	0.728217	0.924225	SCPEP1
Hk2	-0.12732	7292.41	-0.944956	0.344681	0.728599	HK2
Sars	-0.337548	7820.32	-2.76232	0.00573924	0.132032	SARS1
Strap	-0.0161363	7109.34	-0.142196	0.886925	0.972366	STRAP
Cct4	0.0004294	6928.76	0.0038201	0.996952	0.998986	CCT4
Slc38a10	-0.124711	7497.56	-1.10583	0.268801	0.677314	SLC38A10
Calm3	0.114847	7204.62	0.987692	0.323303	0.711905	CALM3
Anxa5	0.230349	6531.22	2.13577	0.032698	0.322794	ANXA5
Rhoa	0.172099	6748.24	1.42515	0.154113	0.574741	RHOA
Hspe1	0.485892	7142.63	3.48086	0.000499798	0.0271113	HSPE1
Fam53b	0.0327843	6508.83	0.254411	0.799178	0.947393	FAM53B
Mpzl1	0.0373045	7131.76	0.337709	0.735582	0.926922	MPZL1
Pcna	0.125312	6940.67	0.99353	0.320452	0.710093	PCNA
Mtch1	-0.0220731	7281.37	-0.202563	0.839477	0.959338	MTCH1
Snd1	-0.217369	7182.9	-1.91649	0.0553027	0.397706	SND1
Eprs	-0.305438	7304.63	-2.46926	0.0135392	0.210556	EPRS1
Tcf25	-0.0915177	6945.7	-0.845215	0.397991	0.762153	TCF25
Selenot	0.0827497	6778.17	0.71869	0.472332	0.804539	SELT
Prrc2b	-0.174183	6915.43	-1.29762	0.194417	0.611373	PRRC2B
Mtmr2	-0.00957587	7076.39	-0.0867981	0.930832	0.983062	MTMR2
Eif2s2	-0.0936828	7174.85	-0.765641	0.44389	0.790572	EIF2S2
Atp5pb	0.172968	6570.49	1.33871	0.180665	0.599538	ATP5F1
Tinagl1	0.00907458	6360.59	0.0658462	0.9475	0.986478	TINAGL1
Ndufa4	0.261811	6823.95	1.94474	0.0518065	0.387137	NDUFA4
Szrd1	0.0946041	6779.71	0.890216	0.37335	0.74579	SZRD1
mt-Nd6	0.0621014	7190.63	0.491056	0.623387	0.88021	ND6
Atp5o	0.250014	6410.62	1.94128	0.0522242	0.388062	ATP5O
Rad21	-0.105758	7080.2	-1.01583	0.30971	0.703657	RAD21
Cdk4	0.144186	6935.45	1.1151	0.264806	0.673838	CDK4
Oat	-0.0934571	6675.1	-0.860603	0.389457	0.756655	OAT
Rad23b	-0.097431	6764.89	-0.943752	0.345297	0.729312	RAD23B
Gdi2	-0.0321849	6722.1	-0.293125	0.769427	0.936786	GDI2
Csnk1a1	-0.189437	6840.94	-1.89419	0.0581997	0.408895	CSNK1A1
Slc3a2	-0.297629	6771.75	-2.61178	0.00900729	0.168694	SLC3A2
Immt	-0.0501863	6652.63	-0.463096	0.643295	0.887281	IMMT
Gnb2	-0.108695	6672.53	-1.00984	0.31257	0.704911	GNB2
Atrx	-0.120978	7034.32	-0.969939	0.332077	0.718355	ATRX
Ywhag	-0.0584377	6429.93	-0.508147	0.61135	0.874979	YWHAG
Atp6v1e1	0.0760294	6624.28	0.655003	0.512466	0.827338	ATP6V1E1
Fkbp1a	0.137004	6432.03	1.26515	0.205817	0.625628	FKBP1A
App	-0.164558	6272.07	-1.43388	0.151607	0.572019	APP
Lonp1	-0.260017	7013.49	-2.28971	0.0220379	0.266038	LONP1
Srsf6	0.129302	6587.32	1.21025	0.226184	0.641157	SRSF6
Copa	-0.240682	6939.33	-2.04905	0.0404576	0.35025	COPA
Glrb	0.0207766	6971.6	0.177931	0.858777	0.963503	GLRB
Serp1	-0.0725575	6657.91	-0.592304	0.553647	0.849124	SERP1
Serf2	0.240556	6678.69	1.88051	0.0600389	0.413427	SERF2
Wsb2	0.0308745	6469.5	0.269882	0.787251	0.941513	WSB2
Atp5g2	0.105662	6606.15	0.848591	0.396109	0.760537	ATP5MC2
Trip12	-0.15144	6453.53	-1.22679	0.219901	0.635	TRIP12
Rrm1	-0.0150966	6627.24	-0.128603	0.897672	0.975468	RRM1
2610507B11Rik	-0.0325173	6037	-0.270722	0.786605	0.941355	KIAA0100
Tcf12	-0.171995	6770	-1.49446	0.135057	0.546903	TCF12
Ap2m1	0.0796737	6320.48	0.767909	0.442541	0.789581	AP2M1
Rpl37a	0.163327	6546.49	1.24766	0.212155	0.630017	RPL37A
Rps27	0.355918	6413.54	2.55408	0.010647	0.186857	RPS27
Atp6v1b2	-0.169219	6160.15	-1.63924	0.101162	0.49626	ATP6V1B2
Rangap1	-0.050128	6333.31	-0.433813	0.664425	0.895602	RANGAP1
Tm9sf3	-0.120699	6496.53	-1.14386	0.25268	0.663987	TM9SF3
Tle5	0.00873127	6450.51	0.0785933	0.937356	0.98334	TLE5
Cdv3	-0.0665692	6518.41	-0.564316	0.572539	0.859256	CDV3
Ppp2r1a	-0.117066	6328.51	-1.07234	0.283566	0.685894	PPP2R1A
Trim28	-0.0613294	6467.44	-0.499892	0.617151	0.877577	TRIM28
Gaa	-0.169074	6207.86	-1.37344	0.169616	0.589207	GAA
Plagl1	-0.137347	6242.2	-1.08821	0.276503	0.682153	PLAGL1
Tom1l2	-0.146569	7011.3	-1.24812	0.211989	0.630017	TOM1L2
Tuba1c	0.17995	6282.5	1.38401	0.166356	0.585084	TUBA1C
Cox8a	0.199139	6439.38	1.52747	0.126644	0.537719	COX8A
Cnot1	-0.191225	6586	-1.55334	0.120342	0.525854	CNOT1
Ttc3	0.137336	6280.48	1.23044	0.218533	0.633282	TTC3
Gnai2	0.0220775	6269.23	0.226581	0.820749	0.954495	GNAI2
Raly	0.176181	6442.12	1.34517	0.17857	0.597512	RALY
Lgals3	0.627744	4764.26	5.24839	1.53434e-07	5.43654e-05	LGALS3
Son	-0.0574089	6290.63	-0.460967	0.644822	0.887706	SON
Uqcrc1	0.0194369	6008.26	0.170122	0.864914	0.96498	UQCRC1
Papola	-0.0543065	6328.98	-0.545309	0.585541	0.863193	PAPOLA
Prdx2	0.314541	6232.64	2.38563	0.0170499	0.238299	PRDX2
Psmd8	0.150038	5890.96	1.11655	0.264189	0.672789	PSMD8
Myo7a	0.117607	5508.94	0.965132	0.334479	0.720415	MYO7A
Fabp5	0.429921	5600.21	3.43844	0.000585077	0.0296922	FABP5
Rapgef2	-0.179745	6332.47	-1.34411	0.178913	0.597728	RAPGEF2
Mki67	0.01009	6215.41	0.0807536	0.935638	0.98334	MKI67
Ywhab	0.0389591	6118.14	0.391809	0.695199	0.911401	YWHAB
Ldhb	-0.0267044	6201.63	-0.227948	0.819687	0.954241	LDHB
Tardbp	0.048366	5942.6	0.440148	0.65983	0.893284	TARDBP
Rapgef1	-0.0461941	6054.38	-0.345586	0.729654	0.924944	RAPGEF1
Ivns1abp	0.110689	6092.08	1.11714	0.263935	0.672789	IVNS1ABP
Serinc1	-0.112314	6117.52	-1.11154	0.266334	0.675238	SERINC1
Ddx39b	0.00346577	6323.66	0.0312445	0.975075	0.993644	DDX39B
Mt2	-0.304482	7059.13	-2.29097	0.0219651	0.265743	MT1M
Cyc1	0.138546	5972.92	1.12817	0.259248	0.668912	CYC1
Cs	-0.14302	5913.41	-1.29284	0.196067	0.614202	CS
Larp1	-0.0990639	5922.41	-0.764026	0.444851	0.791201	LARP1
Mat2a	0.242355	6316.44	2.06263	0.0391475	0.346772	MAT2A
Anp32e	-0.0588075	6325.37	-0.534731	0.592836	0.865257	ANP32E
Stt3b	-0.131326	5957.96	-1.19936	0.230389	0.646482	STT3B
Nrcam	-0.229653	6093.71	-1.90293	0.0570499	0.404126	NRCAM
Cyp51	-0.114555	6286.95	-0.999148	0.317723	0.708272	CYP51A1
Iqgap1	-0.158012	5961.55	-1.23923	0.215261	0.631429	IQGAP1
Cox7b	0.373697	5997.83	2.89385	0.0038055	0.101609	COX7B
Cnn3	-0.0276233	6001.43	-0.246569	0.805242	0.948496	CNN3
Slc6a6	-0.0594489	6013.69	-0.452309	0.651046	0.890105	SLC6A6
Car9	-0.211176	6844.36	-1.86988	0.0615011	0.416682	CA9
Atp6v1g1	0.209731	6054.73	1.56662	0.117204	0.524182	ATP6V1G1
Pum2	-0.141358	6084.32	-1.40312	0.16058	0.579628	PUM2
Gpx4	0.382421	6217.49	2.68142	0.00733113	0.150409	GPX4
Got1	-0.0863013	5419.99	-0.817717	0.413519	0.77186	GOT1
Eif3e	0.0903832	5925.49	0.735493	0.462039	0.798068	EIF3E
Slc6a17	0.151663	5326.6	1.32647	0.184685	0.603946	SLC6A17
Surf4	0.0132201	5869.58	0.130315	0.896317	0.975082	SURF4
Cdc42	0.130752	5798.01	1.07498	0.282382	0.685519	CDC42
Cox6a1	0.128587	5854.24	1.01586	0.309698	0.703657	COX6A1
Slc7a1	-0.42749	6644.12	-3.30649	0.000944744	0.0415624	SLC7A1
Vdac2	-0.0328443	5553.63	-0.316606	0.751543	0.930649	VDAC2
Bag6	-0.15467	6040.71	-1.28239	0.199706	0.618508	BAG6
Cers2	0.0173961	5831.58	0.166892	0.867455	0.965721	CERS2
Eif2s3x	0.0514944	5779.82	0.465999	0.641216	0.88648	EIF2S3
Ipo7	-0.203886	5891.71	-1.97176	0.0486375	0.37887	IPO7
Sdha	-0.182173	5942.95	-1.4758	0.139998	0.553177	SDHA
Hyou1	-0.041634	5603.82	-0.381139	0.7031	0.913743	HYOU1
Igsf8	0.0633338	4960.6	0.474106	0.635425	0.883633	IGSF8
Arpc2	-0.0662923	5711.42	-0.603917	0.545899	0.844054	ARPC2
Rtn4	-0.115191	5535.52	-1.05351	0.292107	0.690503	RTN4
Cbx5	0.0269789	5920	0.258597	0.795946	0.946026	CBX5
Khsrp	-0.0369595	5791.92	-0.288058	0.773302	0.937378	KHSRP
Mdh1	-0.0292759	5574.86	-0.295724	0.767441	0.936056	MDH1
Ipo5	-0.0320101	5655.03	-0.277175	0.781646	0.939782	IPO5
Npc2	0.0448055	5464.37	0.365611	0.714655	0.918219	NPC2
Map4k4	-0.252557	6480.27	-2.01578	0.0438232	0.363313	MAP4K4
Phgdh	-0.136602	6474.82	-0.971731	0.331184	0.71742	PHGDH
Ptp4a1	0.0919764	5605.62	0.82439	0.409718	0.76951	PTP4A1
Cenpb	-0.060788	5829.66	-0.52459	0.599868	0.868572	CENPB
St13	0.184084	5554.1	1.65702	0.0975146	0.491888	ST13
Tnpo1	-0.217121	5883.51	-1.74686	0.080662	0.458975	TNPO1
Naa50	-0.115511	5635.56	-1.05515	0.291356	0.689471	NAA50
Idh3a	0.0959237	5426.48	0.879671	0.379038	0.748258	IDH3A
Brd2	-0.0732686	5933.1	-0.714383	0.474991	0.80584	BRD2
Sf3b3	-0.110374	5755.81	-0.905208	0.365355	0.741114	SF3B3
Atp5d	0.121728	5681	1.13147	0.257855	0.668119	ATP5F1D
Eif3f	-0.0972111	5681.92	-0.964595	0.334747	0.720614	EIF3F
Mthfd1l	-0.161109	5973.2	-1.39663	0.162526	0.582641	MTHFD1L
Gask1b	0.154899	4946.99	1.18572	0.235735	0.649943	GASK1B
Tulp3	-0.177737	5827.66	-1.74981	0.0801506	0.458842	TULP3
Smarca4	-0.0764598	5644.25	-0.59289	0.553255	0.848821	SMARCA4
Dctn1	-0.152079	5855.66	-1.17867	0.23853	0.651328	DCTN1
Lima1	0.0770753	5143.64	0.647856	0.517078	0.830236	LIMA1
Sptbn1	-0.0763185	5384.22	-0.58249	0.560237	0.853142	SPTBN1
Dnmt1	-0.0911069	5739.87	-0.72059	0.471162	0.80366	DNMT1
Dnaja1	0.172251	5322.05	1.49786	0.134169	0.546761	DNAJA1
Dmxl2	0.116254	5312.36	0.931872	0.351403	0.733941	DMXL2
Piezo1	-0.179978	5209.22	-1.34375	0.17903	0.597728	PIEZO1
Lamp2	0.000917449	5357.07	0.00814621	0.9935	0.998049	LAMP2
Uhrf1	0.114717	5553.95	1.00313	0.315797	0.706875	UHRF1
Eif3l	0.0744874	5542.11	0.715343	0.474397	0.805823	EIF3L
Amotl1	-0.25277	6020.97	-1.95899	0.0501135	0.383979	AMOTL1
Plod1	-0.106766	5724.37	-0.904702	0.365623	0.741114	PLOD1
Slc16a3	0.132145	5922.14	1.13987	0.254339	0.666173	SLC16A3
Atp6v1a	-0.159079	5645.2	-1.47216	0.140979	0.554192	ATP6V1A
Hexa	0.0912729	5258.19	0.672085	0.50153	0.822013	HEXA
Arl6ip1	0.0107633	5573.2	0.100186	0.920196	0.98171	ARL6IP1
Actr2	-0.107558	5391.61	-0.966955	0.333567	0.719608	ACTR2
Cadm1	-0.100159	5360.21	-0.819703	0.412385	0.770907	CADM1
Sumo2	0.153377	5424.16	1.26709	0.205122	0.624947	SUMO2
Sf3b2	-0.146189	5633.99	-1.17509	0.239958	0.653625	SF3B2
Nampt	-0.0355817	5198.09	-0.313374	0.753996	0.932116	NAMPT
Atxn2l	-0.156248	5741.43	-1.19156	0.233433	0.648234	ATXN2L
Ube2v1	0.0140466	5459.77	0.13376	0.893592	0.974626	UBE2V1
Insig1	-0.152674	6434.45	-1.18299	0.236812	0.650337	INSIG1
Atp11a	0.0502355	5035.6	0.395818	0.692239	0.909729	ATP11A
Ssr1	-0.0637362	5488.97	-0.626574	0.530939	0.837655	SSR1
Myl6	0.215478	5360.76	1.76843	0.0769892	0.453126	MYL6
Lars2	0.04405	6174.79	0.334389	0.738086	0.92845	LARS2
Hmgn2	0.140921	5846.54	1.11123	0.266468	0.675445	HMGN2
Uqcrq	0.296027	5685.51	2.11392	0.0345223	0.327487	UQCRQ
Txn1	0.143368	5000.54	1.22991	0.21873	0.633432	TXN
Wnk1	-0.0976775	5372.32	-0.745597	0.455911	0.796385	WNK1
Mybbp1a	-0.0741687	5431.46	-0.609649	0.542094	0.842364	MYBBP1A
Mtdh	-0.146757	5691.55	-1.33082	0.183248	0.6028	MTDH
Cdk2ap1	0.123806	5814.73	1.01189	0.31159	0.704501	CDK2AP1
Rab38	0.164251	5044.81	1.27484	0.202367	0.620526	RAB38
Mc1r	0.0937441	5172.96	0.89128	0.372779	0.745476	MC1R
Fam168b	-0.170578	5588.39	-1.49039	0.136122	0.547048	FAM168B
Gtf2h1	0.0533163	5272.55	0.484975	0.627694	0.881102	GTF2H1
Mapk1	-0.111655	5407.86	-1.1472	0.2513	0.662752	MAPK1
Cnot6	-0.0125528	5486.77	-0.121337	0.903424	0.977239	CNOT6
Hmgb2	0.0345038	5890.17	0.25925	0.795442	0.945759	HMGB2
Cyb5a	0.0387918	5401.32	0.28666	0.774373	0.937386	CYB5A
Purb	-0.0977332	5391.5	-0.778861	0.436062	0.786026	PURB
M6pr	0.100469	5230.25	0.883021	0.377225	0.747202	M6PR
Zfp106	-0.199845	5455.55	-1.60243	0.10906	0.511187	ZNF106
Rlim	-0.267731	5530.88	-2.45607	0.0140468	0.213613	RLIM
Qk	-0.0736091	5484.07	-0.673902	0.500373	0.821489	QKI
Dhx9	-0.10155	5459.71	-0.777355	0.436949	0.786246	DHX9
Arpc1b	0.0243231	5213.01	0.232053	0.816497	0.952899	ARPC1B
U2af2	0.0336286	5557.01	0.331266	0.740443	0.928901	U2AF2
Stx7	0.0826429	4987.08	0.682811	0.494726	0.818715	STX7
Stt3a	-0.157172	5331.38	-1.40517	0.159972	0.578727	STT3A
Arf4	0.0433304	5036.15	0.399933	0.689206	0.908348	ARF4
Vegfa	-0.233677	6025.42	-1.77738	0.0755055	0.450212	VEGFA
Alkbh5	-0.264686	5547.76	-2.346	0.0189761	0.248529	ALKBH5
Ssb	-0.00985855	5341.34	-0.0836189	0.933359	0.98334	SSB
Sympk	-0.11274	5358.82	-0.91504	0.36017	0.738048	SYMPK
Rpa1	0.0738819	5197.5	0.667431	0.504497	0.822963	RPA1
Rab27a	0.240361	5007.2	1.85763	0.0632215	0.421682	RAB27A
Rrbp1	-0.183949	5312.31	-1.37147	0.170228	0.589959	RRBP1
Gns	-0.00202099	4882.81	-0.0172816	0.986212	0.996645	GNS
Eif4ebp2	-0.169952	5491.92	-1.38449	0.16621	0.585056	EIF4EBP2
Eif3d	0.0259108	5174.21	0.215364	0.829484	0.956901	EIF3D
Phb	0.371571	5282.46	2.67212	0.00753733	0.152963	PHB
Maz	0.0345897	5374.7	0.312545	0.754626	0.932196	MAZ
Gpr137b	-0.0615363	4838.64	-0.565473	0.571752	0.859015	GPR137B
Pa2g4	0.11228	5189.89	0.923706	0.35564	0.735516	PA2G4
Cdc37	0.0378736	5260.25	0.359329	0.719349	0.920335	CDC37
Ndufs2	0.0366235	5200.66	0.318941	0.749771	0.929945	NDUFS2
Nup205	-0.0864547	5328.41	-0.729151	0.465909	0.800186	NUP205
Cd81	-0.0666468	5544.45	-0.608147	0.54309	0.842893	CD81
Plod2	-0.145046	5719.45	-1.41436	0.157255	0.577273	PLOD2
Arcn1	-0.14722	5289.14	-1.44236	0.149202	0.568699	ARCN1
Erh	0.230845	5336.65	1.73832	0.0821545	0.463113	ERH
Ssrp1	-0.087415	5349.6	-0.769609	0.441532	0.789261	SSRP1
Adam12	-0.289898	7331.93	-2.074	0.0380793	0.342157	ADAM12
Rps21	0.428013	5216.25	3.07273	0.00212109	0.0711162	RPS21
Aup1	0.0770204	5180.75	0.645473	0.518621	0.830883	AUP1
Snrpb	0.0715283	5223.61	0.631767	0.527539	0.836783	SNRPB
Nop56	0.266014	5041.06	2.13644	0.0326439	0.322654	NOP56
Slc38a2	-0.341815	5757.26	-2.55677	0.0105648	0.185911	SLC38A2
Cotl1	0.010281	5305.2	0.103607	0.917481	0.981011	COTL1
Arpc5	0.14183	5017.02	1.24363	0.213636	0.630017	ARPC5
Impad1	-0.123711	5456.63	-1.15892	0.24649	0.659006	BPNT2
Mcm6	0.013983	5075.22	0.108581	0.913535	0.979507	MCM6
Tax1bp1	-0.223834	5132.6	-2.19104	0.0284489	0.302241	TAX1BP1
Ubap2l	-0.00822427	5147.34	-0.0663171	0.947125	0.986323	UBAP2L
Hnrnpc	0.178172	5165.29	1.48817	0.136706	0.548582	HNRNPC
Nup210	-0.259911	5480.1	-2.08864	0.0367404	0.337543	NUP210
Bhlhe41	0.110049	4766.91	0.933744	0.350436	0.733275	BHLHE41
Mlec	-0.0617335	5102.84	-0.553432	0.579968	0.86129	MLEC
Ap2b1	-0.0795809	5064.64	-0.680463	0.496211	0.819781	AP2B1
Slc2a1	-0.11655	5456.06	-1.01716	0.309077	0.703106	SLC2A1
Cyb5b	-0.134733	5182.08	-1.24719	0.212329	0.630017	CYB5B
Fn1	0.202023	4473.54	1.47802	0.139401	0.552642	FN1
Prmt1	0.154704	5127.42	1.18939	0.234286	0.64886	PRMT1
Hadha	-0.082479	5105.87	-0.771418	0.440459	0.788639	HADHA
Dlst	0.101653	4801.57	0.995963	0.319268	0.709599	DLST
Rnf10	-0.0592559	5134.59	-0.53887	0.589976	0.86449	RNF10
Stip1	0.146188	5013.81	1.2087	0.226779	0.641923	STIP1
Syngr1	0.282583	4870.97	2.22088	0.0263593	0.290486	SYNGR1
Txnrd1	-0.163234	5111.24	-1.56081	0.118569	0.525325	TXNRD1
Car14	-0.0361139	5364.43	-0.302571	0.762216	0.934462	CA14
Rpl22	0.097428	5087.81	0.785844	0.431959	0.782828	RPL22
Capza2	-0.0205562	4907.02	-0.201316	0.840451	0.959338	CAPZA2
Ddx21	-0.101756	4933.12	-0.791945	0.428393	0.779382	DDX21
Itgav	-0.0347462	4991.54	-0.278881	0.780336	0.939413	ITGAV
Ppp1cb	-0.00581656	5049.45	-0.0520121	0.958519	0.989233	PPP1CB
Psme3	0.0681234	4948.07	0.655298	0.512276	0.827188	PSME3
Nfe2l1	-0.371151	5408.2	-2.86724	0.00414075	0.106776	NFE2L1
Ncapd2	-0.103409	5297.54	-0.829803	0.40665	0.767963	NCAPD2
Lman2	0.0981591	4907.61	0.862412	0.388461	0.756149	LMAN2
Grn	0.176772	3869.54	1.56561	0.117441	0.524723	GRN
Uggt1	-0.133757	4955.12	-1.16962	0.242153	0.655372	UGGT1
Picalm	-0.199386	5105.25	-1.6841	0.0921616	0.482091	PICALM
Gspt1	0.0522944	5021.94	0.486288	0.626763	0.881025	GSPT1
Psmd3	-0.0407743	4896.37	-0.339511	0.734225	0.926259	PSMD3
Clta	0.106447	4911.86	0.898951	0.368679	0.742512	CLTA
Skp1a	0.244808	4860.68	1.84639	0.0648361	0.425365	SKP1
9530068E07Rik	0.0246224	5141.24	0.211709	0.832334	0.957688	C5orf15
Col4a1	-0.142672	5424.74	-1.07253	0.283483	0.685894	COL4A1
Lrrc59	-0.0300882	4820.25	-0.270146	0.787048	0.941486	LRRC59
Ddx6	-0.15439	5117.89	-1.20156	0.229534	0.646028	DDX6
Dusp4	-0.289384	5354.43	-2.43438	0.0149172	0.22023	DUSP4
Ctnnd1	-0.0956076	4858.57	-0.799449	0.42403	0.77727	CTNND1
Adam9	-0.143373	4965.01	-1.24623	0.21268	0.630017	ADAM9
Psmc1	-0.0211846	4830.69	-0.204856	0.837684	0.959066	PSMC1
Ankrd11	-0.268581	5343.93	-2.07329	0.0381453	0.342157	ANKRD11
Hsd17b12	-0.0339979	4952.29	-0.322368	0.747174	0.929645	HSD17B12
Nisch	-0.0203239	5013.33	-0.160949	0.872134	0.966732	NISCH
Mgrn1	-0.152474	5296.09	-1.21967	0.222591	0.63745	MGRN1
Eng	-0.039198	4568.08	-0.340185	0.733717	0.926186	ENG
Slc25a39	0.00355892	4864.99	0.0316656	0.974739	0.993571	SLC25A39
Ssr2	0.1339	4858.16	1.02226	0.306658	0.701008	SSR2
Gng12	-0.09595	5126.56	-0.91872	0.358242	0.737321	GNG12
Rpl36al	0.330858	4752.95	2.48732	0.0128711	0.205405	RPL36AL
Pcbp4	0.0302693	4759.99	0.266614	0.789766	0.942972	PCBP4
Ap3d1	-0.129444	4877.26	-1.06038	0.288973	0.688824	AP3D1
Srsf5	-0.0586315	4999.39	-0.434708	0.663774	0.895368	SRSF5
Pianp	-0.0840222	4612.77	-0.69663	0.486034	0.812948	PIANP
Rab5c	0.0542928	4476.86	0.496141	0.619795	0.878506	RAB5C
Ppfibp1	-0.126192	4907.9	-1.19752	0.231105	0.647113	PPFIBP1
Ndufs1	-0.131297	4851.2	-1.3301	0.183486	0.60294	NDUFS1
Smarcc1	-0.0873265	4966.18	-0.701955	0.482708	0.811138	SMARCC1
Syncrip	-0.0723393	4884.09	-0.65583	0.511934	0.826871	SYNCRIP
Arpc3	0.22088	4736.87	1.65518	0.0978873	0.492541	ARPC3
Gfpt1	-0.231538	5096.81	-1.92291	0.0544916	0.395609	GFPT1
Jpt1	0.147749	4748.72	1.25154	0.210736	0.630017	JPT1
Vars	-0.159235	4773.3	-1.31547	0.188352	0.607006	VARS1
Naglu	-0.0885978	4794.86	-0.803185	0.421868	0.776564	NAGLU
Wbp2	-0.127576	4858.14	-1.19586	0.231753	0.647458	WBP2
Ddx1	-0.14912	4860.54	-1.33715	0.181174	0.599538	DDX1
Eogt	0.17844	4084.71	1.59024	0.111781	0.515646	EOGT
Ccnd1	-0.289191	4960.82	-2.29429	0.0217739	0.26554	CCND1
Tm4sf1	0.263428	5078.2	1.86116	0.0627212	0.420253	TM4SF1
Nsun2	-0.10737	4774.63	-0.920457	0.357334	0.73716	NSUN2
Capns1	0.0254425	4561.5	0.243556	0.807574	0.949704	CAPNS1
Foxk2	0.0806357	4763.23	0.75351	0.451143	0.793471	FOXK2
Cttn	-0.102649	4589.28	-0.893505	0.371587	0.74491	CTTN
Psmb4	0.191759	4590.86	1.4639	0.143221	0.558533	PSMB4
Sqle	-0.267188	4967.29	-2.08615	0.0369652	0.338487	SQLE
Ptpa	0.139078	4796.51	1.21902	0.222836	0.637547	PPP2R4
Psmc3	0.264052	4510.56	2.12036	0.0339758	0.326336	PSMC3
Dazap2	-0.044596	4700.41	-0.430675	0.666704	0.896277	DAZAP2
Cops7a	0.163055	4645.31	1.3366	0.181354	0.599655	COPS7A
Lgals3bp	0.32484	3603.68	2.62234	0.00873289	0.165867	LGALS3BP
2020-09-02	0.00708368	4663.31	0.0663778	0.947077	0.986323	SEPTIN2
Acat1	0.070163	4906.32	0.586751	0.557371	0.851995	ACAT1
Tmem30a	0.0480344	4688.88	0.41109	0.681006	0.904558	TMEM30A
Etf1	-0.0970371	4632.97	-0.891112	0.372869	0.745476	ETF1
Dhx15	-0.0410252	4676.11	-0.364624	0.715392	0.918244	DHX15
Lrrfip1	-0.115314	4585.52	-0.980752	0.326715	0.713634	LRRFIP1
Mcl1	0.0225436	4501.59	0.20088	0.840792	0.959338	MCL1
Mical3	0.0677199	4440.51	0.557992	0.57685	0.860331	MICAL3
Ppp4r2	-0.0838467	4680.13	-0.817442	0.413676	0.77186	PPP4R2
Rab1a	-0.0406771	4429.06	-0.409722	0.68201	0.905157	RAB1A
Ppib	0.23336	4600.24	1.85565	0.0635037	0.422866	PPIB
Atp6v0a1	-0.136753	4561.74	-1.06896	0.285088	0.68716	ATP6V0A1
Matr3	-0.0105001	4638.65	-0.0961023	0.923439	0.982089	MATR3
Nr4a3	-0.251362	4652.66	-2.21676	0.0266393	0.291537	NR4A3
Ahcy	0.129456	4790.18	1.017	0.309154	0.70316	AHCY
Amfr	-0.221145	4621.24	-2.23418	0.0254712	0.286192	AMFR
Paics	0.0712557	4644.94	0.613714	0.539404	0.840855	PAICS
Rbm39	-0.18608	4753.73	-1.7328	0.0831316	0.464248	RBM39
Bnip3l	-0.00154309	5276.37	-0.0121052	0.990342	0.997765	BNIP3L
Mrpl12	0.418813	4755.02	2.98082	0.00287476	0.0854604	MRPL12
Srpr	-0.0832411	4732.64	-0.81419	0.415536	0.772791	SRPRA
Litaf	0.0181143	4400.2	0.174154	0.861745	0.963583	LITAF
Sorbs3	0.111783	4250.88	0.959824	0.337144	0.722569	SORBS3
Mtap	0.148373	4533.83	1.32801	0.184176	0.60342	MTAP
Kars	0.0042265	4280.52	0.0367736	0.970666	0.992623	KARS1
Apold1	-0.256818	5055.76	-1.99554	0.0459836	0.370298	APOLD1
Actr1b	0.00744528	4597.27	0.0711319	0.943293	0.98477	ACTR1B
Ptprm	-0.181019	5010.21	-1.58038	0.114019	0.519567	PTPRM
Ranbp1	0.179282	4511.05	1.49913	0.13384	0.546761	RANBP1
Psma3	0.29011	4287.57	2.20649	0.0273496	0.296325	PSMA3
Ppm1g	0.0230792	4420.13	0.188831	0.850225	0.961531	PPM1G
Bace2	0.322352	3771.51	2.38266	0.017188	0.238955	BACE2
Trf	-0.0641756	4665.2	-0.660121	0.509176	0.82513	TF
Polr2m	-0.0215542	4534.29	-0.21605	0.828948	0.956901	POLR2M
Metrn	0.123768	4725.29	0.919742	0.357708	0.737225	METRN
Rrp1	-0.018982	4452.26	-0.172444	0.863088	0.964135	RRP1
Brd4	-0.144057	4634.16	-1.08942	0.275967	0.681898	BRD4
Thrap3	-0.0678192	4710.99	-0.5586	0.576435	0.860153	THRAP3
Plekhm2	-0.0110785	4533.09	-0.093685	0.925359	0.982623	PLEKHM2
Mrs2	-0.166902	4672.62	-1.48272	0.138148	0.550491	MRS2
Eftud2	0.0265616	4505.06	0.231725	0.816752	0.952899	EFTUD2
Fkbp8	0.104856	4586.7	0.856597	0.391668	0.758304	FKBP8
Arhgef12	-0.155892	4538.84	-1.21532	0.224245	0.639098	ARHGEF12
Egln1	-0.403103	5162.1	-3.59564	0.000323593	0.019196	EGLN1
Mcm3	0.010534	4400.12	0.0856306	0.93176	0.983062	MCM3
Tpr	-0.153661	4411.99	-1.19597	0.231707	0.647458	TPR
Nop58	-0.00298452	4511.73	-0.0260156	0.979245	0.995088	NOP58
Nacc1	-0.207772	4499.54	-1.6532	0.0982904	0.492726	NACC1
Shmt2	-0.193084	4646.77	-1.50702	0.131805	0.544312	SHMT2
Ppp1r15b	-0.279626	4730.02	-2.49739	0.0125111	0.202996	PPP1R15B
Rps29	0.0598866	4739.87	0.444847	0.656431	0.891989	RPS29
Phlda1	-0.0624858	4710.56	-0.604091	0.545783	0.843975	PHLDA1
Sf1	-0.0683581	4518.94	-0.556177	0.57809	0.860472	SF1
Xpo1	-0.0548012	4442.48	-0.526321	0.598665	0.868389	XPO1
Mapre1	0.117801	4433.65	1.07404	0.282806	0.685575	MAPRE1
Igfbp4	-0.142335	5097.15	-1.42865	0.153106	0.573574	IGFBP4
Aebp2	-0.185593	4546.1	-1.60052	0.109483	0.51214	AEBP2
Sf3a1	-0.0841472	4468.09	-0.766163	0.443579	0.790341	SF3A1
Hmgcr	-0.233425	4782.67	-1.87536	0.0607427	0.414071	HMGCR
Magt1	-0.000871279	4395.53	-0.00866283	0.993088	0.998049	MAGT1
Aff4	-0.253818	4751.1	-1.98441	0.0472099	0.37394	AFF4
Hnrnpul1	-0.158021	4624.2	-1.26062	0.207445	0.627649	HNRNPUL1
Mmp14	-0.18016	4519.52	-1.47136	0.141195	0.554493	MMP14
Chchd3	0.0658682	4467.52	0.534049	0.593308	0.865406	CHCHD3
Ubl3	0.136131	4262.01	1.1123	0.266009	0.675065	UBL3
Eef1d	0.190612	4252.7	1.60283	0.108973	0.511138	EEF1D
Capzb	0.103302	4287.81	0.973185	0.330461	0.716773	CAPZB
Psma7	0.480344	4397.47	3.41867	0.000629269	0.031131	PSMA7
Eif2s1	0.25743	4287.23	1.97762	0.0479717	0.37795	EIF2S1
2020-09-07	0.194421	4463.77	1.63356	0.102352	0.496422	2020-09-07
Galk1	0.167033	4594.98	1.29052	0.196869	0.615086	GALK1
Gpc1	0.0581685	4113.93	0.492823	0.622138	0.880026	GPC1
Scd1	-0.367563	5333.26	-2.6797	0.00736884	0.150946	SCD
Atp13a3	-0.15431	4566.92	-1.2972	0.194564	0.611433	ATP13A3
Chsy3	-0.128469	4588.55	-0.998889	0.317848	0.708425	CHSY3
Edem1	-0.15535	4298.56	-1.50351	0.132708	0.546025	EDEM1
Nars	-0.345974	4663.58	-2.90413	0.00368275	0.0993434	NARS1
Psmc5	0.133487	4245.23	1.15114	0.249674	0.661391	PSMC5
Ccna2	0.0356715	4505.7	0.297888	0.765788	0.935646	CCNA2
Anapc1	-0.160185	4458.62	-1.34816	0.177607	0.596103	ANAPC1
Coro1c	0.00837563	4013.81	0.0665856	0.946912	0.986315	CORO1C
Myadm	-0.0493668	3951.66	-0.385857	0.699603	0.911981	MYADM
Ddost	0.122275	4314.87	1.03597	0.300218	0.696489	DDOST
Nrp2	0.305602	4152.5	2.20536	0.0274287	0.296937	NRP2
Ncor1	-0.0739151	4469.05	-0.623479	0.53297	0.837655	NCOR1
Arf3	-0.222791	4288.88	-1.83486	0.0665271	0.428375	ARF3
Polr2a	-0.221709	4611.28	-1.57114	0.116151	0.5222	POLR2A
Larp4	-0.146403	4332.22	-1.27791	0.201281	0.619101	LARP4
Atxn10	-0.0486474	4271.58	-0.435591	0.663134	0.894872	ATXN10
Dbnl	0.189078	3958.12	1.63103	0.102885	0.497168	DBNL
Luc7l2	-0.0646074	4547.98	-0.500621	0.616638	0.877198	LUC7L2
Nomo1	-0.132917	4338.93	-1.11189	0.266188	0.675238	NOMO1
Xpnpep1	-0.124864	4289.94	-1.07269	0.28341	0.685894	XPNPEP1
Myo10	-0.0751978	4304.4	-0.549073	0.582955	0.862151	MYO10
Tpp1	0.0197989	4210.01	0.196074	0.844552	0.959344	TPP1
Elf2	-0.0959102	4421.43	-0.862241	0.388555	0.756149	ELF2
Atp1b3	0.108478	3947.44	1.00327	0.31573	0.706875	ATP1B3
Rpl38	0.293436	4447.42	2.46293	0.0137806	0.212687	RPL38
Puf60	-0.0331321	4279.18	-0.283106	0.777095	0.938137	PUF60
Scaf11	-0.217411	4415.85	-1.80289	0.0714054	0.439702	SCAF11
Sptlc2	-0.0862156	4002.28	-0.751108	0.452587	0.7943	SPTLC2
Pafah1b1	-0.197794	4302.3	-1.72342	0.0848125	0.469351	PAFAH1B1
Mta1	-0.196115	4448.56	-1.73231	0.0832189	0.464248	MTA1
Tex261	-0.103251	4279.67	-1.04036	0.298173	0.695202	TEX261
Txndc5	-0.0480246	4397.22	-0.441502	0.658849	0.893136	TXNDC5
Ncaph2	0.143365	4395.86	1.09861	0.271937	0.679133	NCAPH2
Tomm70a	-0.0508789	4277.98	-0.465795	0.641362	0.88648	TOMM70
Rbbp4	0.173942	4306.18	1.40553	0.159865	0.578727	RBBP4
Plin3	0.157696	4079.17	1.46386	0.143233	0.558533	PLIN3
Fubp1	0.0357894	4399.92	0.349047	0.727054	0.923918	FUBP1
Spcs2	0.0717121	4270.05	0.559046	0.57613	0.860153	SPCS2
Tnks2	-0.255913	4479.33	-2.3397	0.0192993	0.250888	TNKS2
Hgsnat	-0.119147	4229.6	-0.98087	0.326657	0.713634	HGSNAT
Setd5	-0.194243	4509.88	-1.59191	0.111405	0.515646	SETD5
Psmd1	-0.00621847	4098.22	-0.0548042	0.956294	0.989045	PSMD1
Mef2d	-0.235049	4350.56	-1.82539	0.0679424	0.430207	MEF2D
Khdrbs1	-0.0755939	4290.81	-0.687455	0.491796	0.816232	KHDRBS1
Arpc4	0.217764	4164.46	1.84148	0.0655514	0.427052	ARPC4
Msmo1	-0.239103	4440.24	-2.15578	0.031101	0.317056	MSMO1
Ghitm	-0.178922	4368.53	-1.55876	0.119053	0.525517	GHITM
Dcaf7	-0.146876	4232.13	-1.1727	0.240916	0.654241	DCAF7
Kif5b	-0.166463	4182.49	-1.4069	0.159458	0.578717	KIF5B
Vps35	-0.0752317	4152.7	-0.744408	0.456629	0.796385	VPS35
Nf2	-0.136754	4242.61	-1.13077	0.258152	0.66827	NF2
Dnajc3	0.00291859	4079.04	0.0295904	0.976394	0.993942	DNAJC3
Psmb1	0.254278	4239.35	1.86821	0.0617322	0.417816	PSMB1
Ehmt2	-0.105552	4254.72	-0.992638	0.320887	0.710093	EHMT2
Ctsa	0.180076	3994.4	1.72738	0.0840995	0.466389	CTSA
Rpl39	0.277275	4356.86	2.09464	0.0362032	0.336136	RPL39
Snrnp70	0.0172555	4200.23	0.135516	0.892204	0.973921	SNRNP70
Glmp	0.00439138	4084.27	0.0392727	0.968673	0.992191	GLMP
Ckap5	-0.23203	4429.77	-1.86391	0.0623349	0.419536	CKAP5
Prrc2c	-0.046081	4217.75	-0.334289	0.738161	0.928456	PRRC2C
Capza1	0.0945625	4100.18	0.795799	0.426149	0.777776	CAPZA1
Cdkn1a	-0.163511	4931.03	-1.16407	0.244397	0.657226	CDKN1A
Itm2b	0.156726	3321.68	1.442	0.149303	0.568699	ITM2B
Rnf187	0.0888279	4171.38	0.722067	0.470253	0.803086	RNF187
Snu13	0.297177	4087.76	2.24995	0.0244522	0.281694	NHP2L1
Abce1	-0.0895345	4138.24	-0.829128	0.407032	0.768018	ABCE1
Map4	-0.118458	4083.72	-0.909443	0.363116	0.740005	MAP4
Ubr5	-0.19715	4296.14	-1.49119	0.135912	0.547048	UBR5
Clptm1	-0.045119	4055.97	-0.439608	0.660221	0.893284	CLPTM1
Cd164	-0.055097	3997.99	-0.535499	0.592305	0.865257	CD164
Cul1	-0.0230654	4166.13	-0.230409	0.817774	0.953371	CUL1
Fam174b	0.0204525	3883.85	0.192726	0.847174	0.960305	FAM174B
Stat3	-0.0555731	3682.73	-0.422904	0.672365	0.899735	STAT3
Ctbp1	-0.165077	4181.29	-1.49017	0.136179	0.547048	CTBP1
Ube2l3	0.0174729	4096.19	0.163625	0.870026	0.966381	UBE2L3
Anp32a	-0.0242793	4204.16	-0.206775	0.836186	0.958754	ANP32A
Ppp5c	0.1689	3879.37	1.44017	0.149819	0.568844	PPP5C
Ctnna1	-0.148205	4171.86	-1.12945	0.258708	0.668912	CTNNA1
Uap1l1	0.177185	3889.22	1.42179	0.155086	0.574832	UAP1L1
Shc4	-0.245605	4374.89	-2.29585	0.0216843	0.265073	SHC4
Eif4e	0.185998	4052.9	1.43106	0.152412	0.573021	EIF4E
Uqcr10	0.444935	4121.25	3.29073	0.000999285	0.0429504	UQCR10
Ccdc47	-0.247556	4261.69	-2.28516	0.0223034	0.268009	CCDC47
C1qbp	0.122713	3973.38	1.08676	0.277143	0.682425	C1QBP
Ganab	-0.0838208	4074.26	-0.809076	0.418471	0.77387	GANAB
Uba2	0.128872	4170.46	1.04047	0.298122	0.695202	UBA2
Mbp	0.527626	4415.15	4.36609	1.26488e-05	0.00162575	MBP
Atp6ap1	0.0712463	4010.01	0.686852	0.492176	0.81635	ATP6AP1
Mapk8ip1	0.000165334	3831.18	0.00140213	0.998881	0.999491	MAPK8IP1
Dennd5a	-0.266699	4354.23	-2.31957	0.0203643	0.257675	DENND5A
Wdr26	-0.21193	4181.92	-1.7002	0.0890938	0.477168	WDR26
Dynll1	0.354412	4134.75	2.75348	0.00589649	0.134206	DYNLL1
Swi5	0.294143	4257.71	2.19896	0.0278806	0.299337	SWI5
Wls	-0.0529071	3977.7	-0.501677	0.615895	0.876792	WLS
Snx3	0.0611893	4148.16	0.540306	0.588986	0.86425	SNX3
Pdap1	0.0466613	4226.49	0.457564	0.647266	0.888056	PDAP1
Timp2	-0.117969	4065	-0.993189	0.320618	0.710093	TIMP2
Adgrl2	-0.244438	4316.82	-1.8974	0.0577746	0.406562	ADGRL2
Parvb	-0.0456061	4022.23	-0.387931	0.698067	0.911706	PARVB
Uqcrc2	0.135213	4022.51	1.05754	0.290265	0.689048	UQCRC2
Scly	0.180359	3899.87	1.44545	0.148331	0.567274	SCLY
Cap1	0.0409373	3979.86	0.376423	0.706602	0.914913	CAP1
Parp1	-0.0474418	4117.02	-0.398032	0.690607	0.908737	PARP1
Abcf1	0.0522235	3876.82	0.458735	0.646425	0.887954	ABCF1
Mindy2	-0.102276	4021.4	-0.862034	0.388669	0.756149	MINDY2
Rnf4	-0.0834819	3936.64	-0.851276	0.394616	0.759187	RNF4
Sdhd	0.34012	3902.17	2.57837	0.00992668	0.178682	SDHD
Sirpa	0.0250311	3908.66	0.214126	0.830449	0.956901	SIRPA
Ywhah	0.204295	3750	1.72559	0.0844217	0.467978	YWHAH
Mcm5	0.0702993	3924.66	0.595858	0.55127	0.847939	MCM5
Suz12	-0.216283	4113.99	-1.857	0.0633111	0.421967	SUZ12
Eif5b	-0.0601674	3882.05	-0.474123	0.635412	0.883633	EIF5B
Smc4	-0.0588086	4104.04	-0.503221	0.614809	0.876388	SMC4
Racgap1	0.0106425	4161.83	0.0946903	0.924561	0.982332	RACGAP1
Dkk3	-0.0813362	3755.24	-0.732044	0.464142	0.798963	DKK3
Rasa3	-0.098315	4235.57	-0.911036	0.362276	0.739328	RASA3
Wbp11	-0.146189	4030.11	-1.31375	0.188932	0.608275	WBP11
Hectd1	-0.202688	3789.01	-1.53803	0.124042	0.532829	HECTD1
Lrp6	-0.30879	4363.73	-2.37197	0.0176937	0.242511	LRP6
Smad5	0.0488084	4117.6	0.439607	0.660222	0.893284	SMAD5
Pds5a	-0.100106	3983.78	-0.920229	0.357453	0.737225	PDS5A
Psmb7	0.0528818	3902.95	0.441898	0.658563	0.89284	PSMB7
Cyb5r3	-0.124399	3943.74	-1.07771	0.281164	0.685141	CYB5R3
Pgd	-0.00324562	3883.37	-0.0322198	0.974297	0.993571	PGD
Arhgef2	-0.299956	4193.38	-2.55142	0.0107284	0.187283	ARHGEF2
Mogs	-0.138051	3875.68	-1.14918	0.250481	0.661736	MOGS
Chtop	-0.00184302	3950.91	-0.017144	0.986322	0.996661	CHTOP
Bub3	0.0123857	4022.66	0.107097	0.914712	0.979889	BUB3
Mob1a	-0.120119	3889.85	-1.20958	0.226439	0.641724	MOB1A
Hjurp	-0.036998	4164.94	-0.32682	0.743804	0.929312	HJURP
Rab14	-0.104925	3957.48	-1.07445	0.282623	0.685519	RAB14
Ppp2r5c	-0.0728067	3943.15	-0.742816	0.457593	0.796385	PPP2R5C
Snx1	0.166337	3847.12	1.40644	0.159594	0.578717	SNX1
Atp6v1f	0.241642	3947.96	1.74913	0.0802694	0.458842	ATP6V1F
Coa5	-0.0909507	3860.04	-0.850901	0.394824	0.759187	COA5
Mbd3	0.0323469	3991.39	0.283628	0.776695	0.938137	MBD3
Nsd2	-0.124278	3893.52	-1.10506	0.269135	0.677314	WHSC1
Zfp207	0.140485	4028.89	1.25538	0.209339	0.629512	ZNF207
Ndufb9	0.324538	3836.78	2.41171	0.0158781	0.226509	NDUFB9
Arl8b	0.0867266	3808.66	0.768622	0.442117	0.789276	ARL8B
Lta4h	-0.148188	4164.22	-1.32793	0.184202	0.60342	LTA4H
Atn1	-0.161807	4008.67	-1.25341	0.210057	0.629739	ATN1
Copb2	-0.226181	3998.23	-2.00093	0.0454002	0.369165	COPB2
Tcea1	0.130463	3858.54	0.997196	0.318669	0.708909	TCEA1
Nudt3	0.143221	3842.55	1.3149	0.188542	0.607468	NUDT3
Ubr4	-0.155988	3766.45	-1.13069	0.258184	0.66827	UBR4
Fkbp3	0.0978581	3919.01	0.822543	0.410768	0.77041	FKBP3
Rdx	0.0236323	3704.45	0.228859	0.818978	0.953956	RDX
Gyg	0.0720527	3505.41	0.582745	0.560065	0.853142	GYG1
Tnpo3	-0.122514	3986.29	-1.08733	0.276893	0.682425	TNPO3
Chmp4b	-0.0578101	3732.96	-0.545694	0.585276	0.863193	CHMP4B
Dld	-0.061329	3800.82	-0.585226	0.558396	0.852081	DLD
Rbm25	-0.0599961	4030.85	-0.491187	0.623294	0.88021	RBM25
Gm10053	0.167153	3550.67	1.24586	0.212815	0.630017	CYCS
Rps28	0.157667	4043.37	1.45455	0.145794	0.56295	RPS28
Smg5	0.0350197	3921.2	0.346962	0.72862	0.924338	SMG5
Dars	0.0109214	3728.5	0.0991167	0.921046	0.981827	DARS
Cox7c	0.115537	3928.55	1.00132	0.316674	0.707498	COX7C
Snrnp200	-0.191621	4008.88	-1.39332	0.163524	0.583426	SNRNP200
Dnajc5	-0.254411	3997.28	-2.0929	0.036358	0.336419	DNAJC5
Rnps1	-0.12889	3933.99	-1.08383	0.278438	0.683136	RNPS1
Marcks	-0.123751	3853.52	-1.12125	0.262182	0.670845	MARCKS
Cul7	-0.131842	3706.54	-0.987973	0.323166	0.711905	CUL7
Ube2q1	0.0127872	3736.48	0.126906	0.899015	0.975929	UBE2Q1
Ube2z	-0.1483	3860.05	-1.42368	0.154539	0.574741	UBE2Z
Tgoln1	-0.215823	3933.7	-1.88682	0.0591846	0.411624	TGOLN2
Vdac3	-0.0494299	3635.11	-0.449525	0.653053	0.891175	VDAC3
Nme1	0.134168	3715.11	1.03508	0.300631	0.69683	NME1
Adipor1	0.0192153	3882.41	0.175312	0.860835	0.963503	ADIPOR1
Ahsa1	0.253731	3567.84	2.02942	0.0424154	0.357139	AHSA1
Mthfd2	-0.481222	4503.32	-3.63439	0.000278635	0.0179064	MTHFD2
Hcfc1	-0.171804	3926.59	-1.30969	0.1903	0.608456	HCFC1
Snx5	0.228857	3521.49	1.78126	0.0748704	0.448402	SNX5
Celf1	-0.102064	3820.06	-0.904674	0.365638	0.741114	CELF1
Aldh2	-0.249392	4074.3	-2.21936	0.0264621	0.290551	ALDH2
Git1	-0.122549	3613.66	-0.978824	0.327667	0.714524	GIT1
Nhp2	0.305386	3776.15	2.27185	0.0230956	0.274224	NHP2
Trak2	-0.0437967	3853.41	-0.385666	0.699744	0.911995	TRAK2
Plekha5	-0.0840397	3942.78	-0.813314	0.416038	0.773106	PLEKHA5
Psat1	-0.0759845	4087.21	-0.549121	0.582923	0.862151	PSAT1
Cox6c	0.068757	3747.39	0.651473	0.514741	0.828551	COX6C
Suclg2	-0.153311	3847.74	-1.48449	0.13768	0.550052	SUCLG2
Atp6v0b	0.402705	3771.88	2.8428	0.00447197	0.112745	ATP6V0B
St3gal6	0.185487	3622.27	1.55036	0.121054	0.527309	ST3GAL6
Gps1	0.117325	3745.8	0.983061	0.325577	0.713454	GPS1
Tmem59	-0.00571145	3718.77	-0.0512255	0.959146	0.989565	TMEM59
Pdcd6ip	-0.138412	3727.04	-1.16502	0.24401	0.657226	PDCD6IP
Sae1	0.0302377	3686.69	0.251003	0.801812	0.947813	SAE1
Txn2	0.192347	3717.53	1.47885	0.139181	0.552642	TXN2
Cyp2j6	0.165094	3769.97	1.49887	0.133906	0.546761	CYP2J2
Sec13	0.127281	3720.81	1.00278	0.315966	0.706879	SEC13
Hbb-bs	0.218115	10365.3	3.48051	0.000500453	0.0271113	HBB
Ube2i	0.134822	3801.52	1.22604	0.220182	0.635392	UBE2I
Slk	-0.0936578	3671.98	-0.835545	0.403411	0.766036	SLK
Clic4	-0.283494	3715.69	-2.36391	0.0180831	0.243993	CLIC4
Nucb1	-0.0330302	3604.76	-0.332348	0.739627	0.928591	NUCB1
Prdm16	-0.0143464	3897.73	-0.122767	0.902292	0.977123	PRDM16
Ppargc1a	0.0365253	3015.48	0.295672	0.76748	0.936056	PPARGC1A
Huwe1	-0.0927856	3707.71	-0.73206	0.464132	0.798963	HUWE1
Glrx3	0.238225	3813.52	1.77244	0.0763212	0.451946	GLRX3
Pafah1b2	0.0349301	3790.23	0.336569	0.736442	0.92745	PAFAH1B2
Hmgcs1	-0.422592	4295.65	-3.14488	0.00166153	0.0601732	HMGCS1
Csnk1d	-0.189096	3771.19	-1.68026	0.0929073	0.483915	CSNK1D
Ap2a1	-0.160039	3654.63	-1.26376	0.206318	0.625631	AP2A1
Bclaf1	0.0954298	3718.44	0.855383	0.392339	0.758464	BCLAF1
Nploc4	-0.121377	3588.16	-1.11083	0.266641	0.675622	NPLOC4
Samm50	-0.0305239	3659.95	-0.289491	0.772206	0.937378	SAMM50
Ptges3	0.217764	3559.87	1.7532	0.0795684	0.458555	PTGES3
Dynll2	-0.15644	3527.98	-1.24957	0.211455	0.630017	DYNLL2
Pole4	0.172917	3696.66	1.31124	0.189776	0.608456	POLE4
Rock2	-0.154574	3670.63	-1.24758	0.212187	0.630017	ROCK2
Usp5	-0.00133292	3663	-0.0120776	0.990364	0.997765	USP5
Metap2	-0.0913929	3696.25	-0.81231	0.416614	0.773567	METAP2
Clptm1l	-0.00925621	3653.25	-0.085454	0.9319	0.983062	CLPTM1L
Ipo9	-0.0107268	3698.28	-0.0956382	0.923808	0.982089	IPO9
Psen2	0.0509616	3707.41	0.496081	0.619837	0.878506	PSEN2
Srp72	-0.172875	3866.77	-1.62672	0.103798	0.499005	SRP72
Atp6v0e2	0.00793944	3770.19	0.0692714	0.944774	0.985161	ATP6V0E2
Tra2b	0.00652406	3698.41	0.0618514	0.950681	0.987312	TRA2B
Atp5h	0.372382	3572.56	2.71315	0.00666472	0.142769	ATP5PD
L3mbtl2	0.238503	3338.85	2.04233	0.041119	0.351845	L3MBTL2
Acsl3	-0.332923	4134.44	-3.15474	0.00160641	0.0588268	ACSL3
Gusb	0.00924925	3514.73	0.0792803	0.93681	0.98334	GUSB
Ppid	0.149843	3550.33	1.3341	0.182172	0.601143	PPID
Tex2	0.0223065	3489.84	0.22355	0.823107	0.954826	TEX2
Cox6b1	0.288509	3441.22	2.22486	0.026091	0.289328	COX6B1
Gys1	-0.432242	4242.63	-3.62188	0.000292471	0.0182471	GYS1
Map2k1	-0.187721	3703.28	-1.87664	0.0605679	0.414042	MAP2K1
Dnaja2	-0.104505	3609.87	-0.903738	0.366134	0.741316	DNAJA2
Atad2	-0.00832596	3619.17	-0.0761957	0.939263	0.983925	ATAD2
Scarb1	-0.163889	3970.06	-1.49235	0.135606	0.546903	SCARB1
Api5	-0.0358048	3534.08	-0.348257	0.727647	0.923918	API5
Nfic	-0.0550795	3622.08	-0.403406	0.68665	0.907008	NFIC
Rsl1d1	0.0860896	3508.11	0.771071	0.440665	0.788667	RSL1D1
Raver1	-0.0895104	3642.58	-0.731191	0.464663	0.79944	RAVER1
Celf2	-0.220177	3781.56	-1.78255	0.0746588	0.447748	CELF2
Poldip3	0.0136679	3534.82	0.129222	0.897182	0.975457	POLDIP3
Baz1b	-0.0627624	3595.41	-0.550197	0.582184	0.861805	BAZ1B
Tra2a	0.193962	3595.54	1.62687	0.103765	0.499005	TRA2A
Mbnl2	-0.176674	3758.26	-1.41796	0.156204	0.576854	MBNL2
Tmf1	0.125478	3319.71	1.2359	0.216497	0.631583	TMF1
Tor1aip2	0.0346413	3339.82	0.308604	0.757623	0.933412	TOR1AIP2
Rps27l	0.480776	3605.31	3.47548	0.000509948	0.027512	RPS27L
Pitpna	0.0926673	3422.83	0.858725	0.390492	0.757749	PITPNA
Slc39a7	-0.164056	3485.28	-1.33745	0.181075	0.599538	SLC39A7
Tram1	0.0723063	3420.27	0.625607	0.531573	0.837655	TRAM1
Megf8	-0.254053	3890.41	-1.88204	0.05983	0.412827	MEGF8
Dnajc7	-0.120319	3620.24	-1.10827	0.267745	0.676456	DNAJC7
Rap2b	-0.160191	3979.51	-1.54898	0.121387	0.528174	RAP2B
Mfsd5	0.0507965	3332.37	0.483985	0.628397	0.881167	MFSD5
Ociad1	0.111513	3463.91	0.924554	0.355198	0.73495	OCIAD1
Zc3h14	-0.203071	3624.47	-1.86388	0.0623383	0.419536	ZC3H14
Sod1	0.122169	3584.27	1.08303	0.278794	0.683136	SOD1
Derl1	-0.0413073	3516.58	-0.36923	0.711956	0.917053	DERL1
Tomm40	-0.019842	3440.11	-0.174624	0.861375	0.963583	TOMM40
Napa	0.0972534	3447.1	0.838725	0.401624	0.763971	NAPA
Ppt2	0.0763449	3498.24	0.688645	0.491047	0.816218	PPT2
Usp9x	-0.275177	3647.41	-2.24827	0.0245587	0.28193	USP9X
Ldlr	-0.320064	4055.25	-2.34695	0.018928	0.248395	LDLR
Fmn1	-0.0114488	3489.59	-0.087752	0.930074	0.983062	FMN1
Nolc1	0.168646	3391.15	1.35422	0.175665	0.595432	NOLC1
Nrd1	-0.115901	3578.63	-1.02542	0.305163	0.699833	NRD1
Psmd4	0.163242	3431.08	1.29178	0.196433	0.614256	PSMD4
Smarca5	-0.197527	3617.29	-1.69319	0.0904197	0.478687	SMARCA5
Insc	0.187485	3501.62	1.38972	0.164615	0.58501	INSC
Sub1	0.165872	3658.24	1.26362	0.206366	0.625631	SUB1
Dhcr7	-0.0423751	3525.08	-0.387743	0.698207	0.911706	DHCR7
Emc3	0.0541198	3506.65	0.481199	0.630375	0.881328	EMC3
Naa15	-0.0219139	3394.4	-0.191865	0.847848	0.960367	NAA15
Slc6a8	0.00501202	3183.88	0.0392012	0.96873	0.992191	SLC6A8
Atp5j	0.0970656	3487.84	0.823728	0.410094	0.769732	ATP5J
Wdfy1	-0.0345994	3426.99	-0.28574	0.775077	0.937386	WDFY1
Atic	0.02807	3360.67	0.233385	0.815463	0.952572	ATIC
Appl2	-0.0993694	4035.13	-0.775183	0.438232	0.78734	APPL2
Psmb3	0.291496	3434.42	2.13669	0.032623	0.322654	PSMB3
Nr4a1	-0.521422	4110.56	-3.85669	0.000114934	0.00947667	NR4A1
Ppp1r14b	0.097551	3610.92	0.840996	0.40035	0.763057	PPP1R14B
Nup50	0.0128273	3443.36	0.122456	0.902538	0.977123	NUP50
Usp19	-0.16675	3424.96	-1.37034	0.17058	0.590459	USP19
Manf	0.246583	3367.76	2.08218	0.0373256	0.339582	MANF
Copz1	-0.047146	3556.13	-0.453201	0.650404	0.889877	COPZ1
Kdm3a	-0.18978	3803.63	-1.66625	0.0956642	0.488379	KDM3A
Macf1	-0.131615	3581.22	-0.955691	0.339229	0.724623	MACF1
Zfp706	0.060774	3383.59	0.579376	0.562335	0.853661	ZNF706
Psmd7	0.162977	3356.04	1.357	0.174783	0.593935	PSMD7
Cope	0.0419919	3618.39	0.341699	0.732577	0.925606	COPE
Gabarap	0.188841	3435.76	1.48621	0.137223	0.549647	GABARAP
Map2k2	0.0432195	3407.24	0.387921	0.698075	0.911706	MAP2K2
Tbx2	-0.408236	3591.15	-3.08606	0.00202829	0.0694993	TBX2
Ndufa9	0.00891559	3375.95	0.0847409	0.932467	0.983062	NDUFA9
Asns	-0.370681	4029.28	-2.70614	0.006807	0.144401	ASNS
Ptbp3	-0.103101	3410.25	-1.00781	0.313546	0.705438	PTBP3
Glyr1	0.0496356	3561.83	0.504025	0.614244	0.875869	GLYR1
Tmx2	0.0184082	3265.33	0.179742	0.857355	0.963503	TMX2
Csk	0.0664773	3317.98	0.5948	0.551977	0.848449	CSK
Psmc4	0.174978	3367.58	1.43275	0.15193	0.572194	PSMC4
Cops2	-0.0894558	3420.07	-0.84332	0.399049	0.762503	COPS2
Fat1	-0.222928	3590.41	-1.59159	0.111476	0.515646	FAT1
Nudc	-0.00857502	3339.68	-0.0718056	0.942757	0.984769	NUDC
Atp6v1d	-0.0471512	3370.12	-0.408712	0.682751	0.905591	ATP6V1D
Akr1b3	0.211035	3441.26	1.58443	0.113095	0.518057	AKR1B1
Lamc1	-0.200298	3527.57	-1.52324	0.1277	0.540074	LAMC1
Traf4	-0.134495	3487.13	-1.24161	0.214381	0.630659	TRAF4
Iars	-0.437831	3897.13	-3.54865	0.000387217	0.0220714	IARS1
Wdr6	-0.282114	3762.98	-2.23625	0.0253352	0.286192	WDR6
Grina	-0.063367	3158.88	-0.571718	0.567513	0.856759	GRINA
Fermt2	-0.166887	3624.34	-1.54635	0.122021	0.528826	FERMT2
Uqcrfs1	-0.0384131	3372.11	-0.365485	0.714749	0.918219	UQCRFS1
Nek9	-0.159782	3360.21	-1.35274	0.176137	0.595769	NEK9
Csnk2a1	-0.111187	3495.53	-0.973541	0.330285	0.716655	CSNK2A1
Hnrnpd	-0.118565	3503.75	-0.893101	0.371803	0.74491	HNRNPD
Itm2c	-0.078478	3421.5	-0.75562	0.449877	0.793199	ITM2C
St6gal1	-0.0314914	3229.51	-0.286615	0.774407	0.937386	ST6GAL1
Rtkn	0.0106658	3569.33	0.105495	0.915983	0.980804	RTKN
Serinc3	-0.17035	3207.27	-1.53488	0.124814	0.534044	SERINC3
Mcm7	0.0625907	3433.67	0.522123	0.601585	0.869205	MCM7
Atp5j2	0.272736	3377.9	1.96865	0.0489928	0.380282	ATP5MF
Spcs3	0.022575	3370.44	0.187296	0.851428	0.961607	SPCS3
Ubtf	-0.061304	3398.81	-0.542291	0.587618	0.86425	UBTF
Clstn1	-0.269668	3697.21	-2.26425	0.0235588	0.276721	CLSTN1
Igf2r	-0.136626	3507.83	-0.994179	0.320136	0.710028	IGF2R
Eif4g3	-0.0618212	3485.71	-0.45944	0.645918	0.887842	EIF4G3
Vapa	-0.0830527	3367.55	-0.753102	0.451389	0.793471	VAPA
Ecpas	-0.186671	3316.22	-1.65489	0.097946	0.492548	KIAA0368
Wars	-0.0539905	3242.17	-0.519509	0.603406	0.870223	WARS
Crk	-0.0412176	3338.98	-0.398019	0.690616	0.908737	CRK
Pax3	-0.289441	3529.81	-2.71159	0.00669614	0.143007	PAX3
Pnn	0.115194	3413.74	0.965363	0.334363	0.720415	PNN
Higd1a	-0.0662126	3753.3	-0.55022	0.582169	0.861805	HIGD1A
Ssbp4	-0.067345	3466.32	-0.555233	0.578736	0.860472	SSBP4
Iars2	-0.156311	3412.01	-1.39437	0.163205	0.583251	IARS2
Spen	0.010255	3638.93	0.0760042	0.939416	0.983925	SPEN
Morf4l2	0.019885	3325.39	0.17939	0.857632	0.963503	MORF4L2
Kcmf1	-0.0289648	3442.34	-0.235339	0.813946	0.952157	KCMF1
Dnajc10	-0.0592398	3427.33	-0.522976	0.600991	0.869032	DNAJC10
Myl12a	0.188253	3174.04	1.57836	0.114483	0.519956	MYL12B
Arf5	0.105426	3408.15	0.784045	0.433014	0.783549	ARF5
Ptp4a2	-0.0112324	3446.36	-0.095688	0.923768	0.982089	PTP4A2
Aph1a	-0.0141576	3218.43	-0.133384	0.89389	0.974626	APH1A
Mark3	-0.181514	3405.89	-1.74848	0.0803817	0.458842	MARK3
Smarce1	0.155356	3446.51	1.31715	0.187788	0.606429	SMARCE1
Polr1d	0.271048	3333.01	1.99282	0.0462808	0.371323	POLR1D
Park7	0.05564	3436.1	0.459873	0.645608	0.88775	PARK7
Yap1	-0.155165	3287.06	-1.31264	0.189304	0.608456	YAP1
Srsf10	0.172757	3247.06	1.69683	0.0897285	0.477807	SRSF10
[truncated: 12,255 more rows]

## Sheet: SMAC+ICB_vs_ICB
	log2FC	baseMean	stat	pvalue	padj	Human
[truncated: 13,376 more rows]

[truncated: 1 more sheets: TIMER_results]
